# Supplementary material for: In silico identification of novel kinase inhibitors targeting wild-type and T315I mutant ABL1 from FDA-approved drugs
Source: Royal Society of Chemistry journal article supplement (doi:10.1039/c3mb70577c), 2014-02-18
Supplement: c3mb70577c2.xlsx [file c3mb70577c2.xlsx]

## Sheet: Sheet1
Table S3 positive ligands set for wild-type ABL1
COMPOUND_ID	SMILES	Canonical_SMILES
CHEMBL550281	Cc2ccc(C(=O)Nc1cc(C(F)(F)F)ccn1)cc2\C=C\n3cnc4cncnc34	Cc1ccc(cc1\C=C\n2cnc3cncnc23)C(=O)Nc4cc(ccn4)C(F)(F)F
CHEMBL556874	Cc2ccc(C(=O)Nc1cc(C(F)(F)F)ccn1)cc2\C=C\n4cnc5c(NC3CC3)ncnc45	Cc1ccc(cc1\C=C\n2cnc3c(NC4CC4)ncnc23)C(=O)Nc5cc(ccn5)C(F)(F)F
CHEMBL1169875	Cc2ccc(C(=O)Nc1cc(C(F)(F)F)ccn1)cc2C#Cn4cnc5c(NC3CC3)ncnc45	Cc1ccc(cc1C#Cn2cnc3c(NC4CC4)ncnc23)C(=O)Nc5cc(ccn5)C(F)(F)F
CHEMBL1169876	Cc2ccc(C(=O)Nc1cc(C(F)(F)F)on1)cc2\C=C\n4cnc5c(NC3CC3)ncnc45	Cc1ccc(cc1\C=C\n2cnc3c(NC4CC4)ncnc23)C(=O)Nc5cc(on5)C(F)(F)F
CHEMBL1171280	Cc2ccc(C(=O)Nc1cc(C(F)(F)F)on1)cc2C#Cn4cnc5c(NC3CC3)cccc45	Cc1ccc(cc1C#Cn2cnc3c(NC4CC4)cccc23)C(=O)Nc5cc(on5)C(F)(F)F
CHEMBL1172720	Cc2ccc(C(=O)Nc1cccc(C(F)(F)F)c1)cc2C#Cc3cnc4cccnn34	Cc1ccc(cc1C#Cc2cnc3cccnn23)C(=O)Nc4cccc(c4)C(F)(F)F
CHEMBL559826	Cc3ccc(C(=O)Nc2cc(n1ccnc1)cc(C(F)(F)F)c2)cc3\C=C\n5cnc6c(NC4CC4)ncnc56	Cc1ccc(cc1\C=C\n2cnc3c(NC4CC4)ncnc23)C(=O)Nc5cc(cc(c5)C(F)(F)F)n6ccnc6
CHEMBL1172397	Cc3ccc(C(=O)Nc2cc(n1ccnc1)cc(C(F)(F)F)c2)cc3C#Cc4cnc5c(N)cccn45	Cc1ccc(cc1C#Cc2cnc3c(N)cccn23)C(=O)Nc4cc(cc(c4)C(F)(F)F)n5ccnc5
CHEMBL1171283	Cc3ccc(C(=O)Nc2ccc(CN1CCOCC1)c(C(F)(F)F)c2)cc3C#Cc4cnc5ccccn45	Cc1ccc(cc1C#Cc2cnc3ccccn23)C(=O)Nc4ccc(CN5CCOCC5)c(c4)C(F)(F)F
CHEMBL1171038	Cc4ccc(C(=O)Nc3cc(n2cnc(CN1CCCC1)c2)cc(C(F)(F)F)c3)cc4C#Cc5cnc6ccccn56	Cc1ccc(cc1C#Cc2cnc3ccccn23)C(=O)Nc4cc(cc(c4)C(F)(F)F)n5cnc(CN6CCCC6)c5
CHEMBL1421	Cc4nc(Nc2ncc(C(=O)Nc1c(C)cccc1Cl)s2)cc(N3CCN(CCO)CC3)n4	Cc1nc(Nc2ncc(s2)C(=O)Nc3c(C)cccc3Cl)cc(n1)N4CCN(CCO)CC4
CHEMBL1171679	Cc5cn(c4cc(NC(=O)c3ccc(C)c(\C=C\n1cnc2c(N)ncnc12)c3)cc(C(F)(F)F)c4)cn5	Cc1cn(cn1)c2cc(NC(=O)c3ccc(C)c(\C=C\n4cnc5c(N)ncnc45)c3)cc(c2)C(F)(F)F
CHEMBL255863	Cc5cn(c4cc(NC(=O)c3ccc(C)c(Nc2nccc(c1cccnc1)n2)c3)cc(C(F)(F)F)c4)cn5	Cc1cn(cn1)c2cc(NC(=O)c3ccc(C)c(Nc4nccc(n4)c5cccnc5)c3)cc(c2)C(F)(F)F
CHEMBL1077317	Cc6cn(c5cc(NC(=O)c4ccc(C)c(/C=C/N2CNc3c(NC1CC1)ncnc23)c4)cc(C(F)(F)F)c5)cn6	Cc1cn(cn1)c2cc(NC(=O)c3ccc(C)c(\C=C\N4CNc5c(NC6CC6)ncnc45)c3)cc(c2)C(F)(F)F
CHEMBL1171473	CN(C)[C@@H]5CCN(Cc4ccc(NC(=O)c3ccc(C)c(C#Cc1cnc2ccccn12)c3)cc4C(F)(F)F)C5	CN(C)[C@@H]1CCN(Cc2ccc(NC(=O)c3ccc(C)c(c3)C#Cc4cnc5ccccn45)cc2C(F)(F)F)C1
CHEMBL1169881	CN5CCC(Oc4ccc(NC(=O)c3ccc(C)c(C#Cc1cnc2ccccn12)c3)cc4C(F)(F)F)CC5	CN1CCC(CC1)Oc2ccc(NC(=O)c3ccc(C)c(c3)C#Cc4cnc5ccccn45)cc2C(F)(F)F
CHEMBL1169705	CN5CCCN(Cc4ccc(NC(=O)c3ccc(C)c(C#Cc1cnc2ccccn12)c3)cc4C(F)(F)F)CC5	CN1CCCN(Cc2ccc(NC(=O)c3ccc(C)c(c3)C#Cc4cnc5ccccn45)cc2C(F)(F)F)CC1
CHEMBL1171282	CN5CCN(Cc4cc(NC(=O)c3ccc(C)c(C#Cc1cnc2ccccn12)c3)cc(C(F)(F)F)c4)CC5	CN1CCN(Cc2cc(NC(=O)c3ccc(C)c(c3)C#Cc4cnc5ccccn45)cc(c2)C(F)(F)F)CC1
CHEMBL1171281	CN5CCN(Cc4ccc(C(=O)Nc3ccc(C)c(C#Cc1cnc2ccccn12)c3)cc4C(F)(F)F)CC5	CN1CCN(Cc2ccc(cc2C(F)(F)F)C(=O)Nc3ccc(C)c(c3)C#Cc4cnc5ccccn45)CC1
CHEMBL941	CN5CCN(Cc4ccc(C(=O)Nc3ccc(C)c(Nc2nccc(c1cccnc1)n2)c3)cc4)CC5	CN1CCN(Cc2ccc(cc2)C(=O)Nc3ccc(C)c(Nc4nccc(n4)c5cccnc5)c3)CC1
CHEMBL1173201	CN5CCN(Cc4ccc(NC(=O)c3ccc(C)c(\C=C\c1cnc2cccnn12)c3)cc4C(F)(F)F)CC5	CN1CCN(Cc2ccc(NC(=O)c3ccc(C)c(\C=C\c4cnc5cccnn45)c3)cc2C(F)(F)F)CC1
CHEMBL1171086	CN5CCN(Cc4ccc(NC(=O)c3ccc(C)c(C#Cc1cnc2ccccn12)c3)cc4C(F)(F)F)CC5	CN1CCN(Cc2ccc(NC(=O)c3ccc(C)c(c3)C#Cc4cnc5ccccn45)cc2C(F)(F)F)CC1
CHEMBL1171837	CN5CCN(Cc4ccc(NC(=O)c3ccc(C)c(C#Cc1cnc2cccnn12)c3)cc4C(F)(F)F)CC5	CN1CCN(Cc2ccc(NC(=O)c3ccc(C)c(c3)C#Cc4cnc5cccnn45)cc2C(F)(F)F)CC1
CHEMBL1171836	CN5CCN(Cc4ccc(NC(=O)c3ccc(C)c(C#Cc1cnc2cnccn12)c3)cc4C(F)(F)F)CC5	CN1CCN(Cc2ccc(NC(=O)c3ccc(C)c(c3)C#Cc4cnc5cnccn45)cc2C(F)(F)F)CC1
CHEMBL1171835	CN5CCN(Cc4ccc(NC(=O)c3ccc(C)c(C#Cc1cnc2ncccn12)c3)cc4C(F)(F)F)CC5	CN1CCN(Cc2ccc(NC(=O)c3ccc(C)c(c3)C#Cc4cnc5ncccn45)cc2C(F)(F)F)CC1
CHEMBL1171658	CN5CCN(Cc4ccc(NC(=O)c3ccc(C)c(C#Cc2cnc1[nH]c(=O)[nH]c1c2)c3)cc4C(F)(F)F)CC5	CN1CCN(Cc2ccc(NC(=O)c3ccc(C)c(c3)C#Cc4cnc5NC(=O)Nc5c4)cc2C(F)(F)F)CC1
CHEMBL1171479	CN5CCN(Cc4ccc(NC(=O)c3ccc(C)c(C#Cc2cnc1[nH]ccc1c2)c3)cc4C(F)(F)F)CC5	CN1CCN(Cc2ccc(NC(=O)c3ccc(C)c(c3)C#Cc4cnc5[nH]ccc5c4)cc2C(F)(F)F)CC1
CHEMBL1171657	CN5CCN(Cc4ccc(NC(=O)c3ccc(C)c(C#Cc2cnc1[nH]cnc1c2)c3)cc4C(F)(F)F)CC5	CN1CCN(Cc2ccc(NC(=O)c3ccc(C)c(c3)C#Cc4cnc5[nH]cnc5c4)cc2C(F)(F)F)CC1
CHEMBL1171247	CN5CCN(Cc4ccc(NC(=O)c3ccc(C)c(C#Cc2cnc1NC(=O)COc1c2)c3)cc4C(F)(F)F)CC5	CN1CCN(Cc2ccc(NC(=O)c3ccc(C)c(c3)C#Cc4cnc5NC(=O)COc5c4)cc2C(F)(F)F)CC1
CHEMBL1173200	CN5CCN(Cc4ccc(NC(=O)c3ccc(C)c(CCc1cnc2cccnn12)c3)cc4C(F)(F)F)CC5	CN1CCN(Cc2ccc(NC(=O)c3ccc(C)c(CCc4cnc5cccnn45)c3)cc2C(F)(F)F)CC1
CHEMBL1172719	CN6CCN(Cc4ccc(NC(=O)c3ccc(C)c(C#Cc1cnc2cccnn12)c3)cc4C5CC5)CC6	CN1CCN(Cc2ccc(NC(=O)c3ccc(C)c(c3)C#Cc4cnc5cccnn45)cc2C6CC6)CC1
CHEMBL288441	COc4cc(Nc2c(C#N)cnc3cc(OCCCN1CCN(C)CC1)c(OC)cc23)c(Cl)cc4Cl	COc1cc(Nc2c(cnc3cc(OCCCN4CCN(C)CC4)c(OC)cc23)C#N)c(Cl)cc1Cl
