# Supplementary material for: In silico identification of novel kinase inhibitors targeting wild-type and T315I mutant ABL1 from FDA-approved drugs
Source: Royal Society of Chemistry journal article supplement (doi:10.1039/c3mb70577c), 2014-02-18
Supplement: c3mb70577c3.xlsx [file c3mb70577c3.xlsx]

## Sheet: Sheet1
Table S4 positive ligands set for T315I ABL1
COMPOUND_ID	SMILES	Canonical_SMILES
CHEMBL103667	Cc5ccc(n1nc(C(C)(C)C)cc1NC(=O)Nc3ccc(OCCN2CCOCC2)c4ccccc34)cc5	Cc1ccc(cc1)n2nc(cc2NC(=O)Nc3ccc(OCCN4CCOCC4)c5ccccc35)C(C)(C)C
CHEMBL535	CCN(CC)CCNC(=O)c3c(C)[nH]c(\C=c1/c(=O)[nH]c2ccc(F)cc12)c3C	CCN(CC)CCNC(=O)c1c(C)[nH]c(\C=C\2/C(=O)Nc3ccc(F)cc23)c1C
CHEMBL574738	CCN4CCN(Cc3ccc(NC(=O)Nc2ccc(Oc1cc(NC)ncn1)cc2)cc3C(F)(F)F)CC4	CCN1CCN(Cc2ccc(NC(=O)Nc3ccc(Oc4cc(NC)ncn4)cc3)cc2C(F)(F)F)CC1
CHEMBL162	CN[C@@H]1CC5O[C@@](C)([C@@H]1OC)n7c2ccccc2c8c3CNC(=O)c3c6c4ccccc4n5c6c78	CN[C@@H]1CC2O[C@@](C)([C@@H]1OC)n3c4ccccc4c5c6CNC(=O)c6c7c8ccccc8n2c7c35
CHEMBL482968	CN4CCN(c3cc(Nc1cc(C)[nH]n1)nc(/C=C/c2ccccc2)n3)CC4	CN1CCN(CC1)c2cc(Nc3cc(C)[nH]n3)nc(\C=C\c4ccccc4)n2
CHEMBL572878	CN5CCN(c4cc(Nc1cc(C)n[nH]1)nc(Sc3ccc(NC(=O)C2CC2)cc3)n4)CC5	CN1CCN(CC1)c2cc(Nc3cc(C)[nH]n3)nc(Sc4ccc(NC(=O)C5CC5)cc4)n2
CHEMBL522892	CN5CCN(c4ccc3nc(c2c(N)c1c(F)cccc1[nH]c2=O)[nH]c3c4)CC5	CN1CCN(CC1)c2ccc3nc([nH]c3c2)C4=C(N)c5c(F)cccc5NC4=O
CHEMBL24828	COc3cc2c(Nc1ccc(Br)cc1F)ncnc2cc3OCC4CCN(C)CC4	COc1cc2c(Nc3ccc(Br)cc3F)ncnc2cc1OCC4CCN(C)CC4
CHEMBL288441	COc4cc(Nc2c(C#N)cnc3cc(OCCCN1CCN(C)CC1)c(OC)cc23)c(Cl)cc4Cl	COc1cc(Nc2c(cnc3cc(OCCCN4CCN(C)CC4)c(OC)cc23)C#N)c(Cl)cc1Cl
CHEMBL31965	Fc4ccc(Nc2ncnc3cc(OCCCN1CCOCC1)c(NC(=O)C=C)cc23)cc4Cl	Fc1ccc(Nc2ncnc3cc(OCCCN4CCOCC4)c(NC(=O)C=C)cc23)cc1Cl
CHEMBL191003	Nc2nc(Nc1ccc(S(N)(=O)=O)cc1)nn2C(=O)c3c(F)cccc3F	Nc1nc(Nc2ccc(cc2)S(=O)(=O)N)nn1C(=O)c3c(F)cccc3F
CHEMBL495727	O=C(NC1CC1)Nc2c[nH]nc2c5nc4cc(CN3CCOCC3)ccc4[nH]5	O=C(NC1CC1)Nc2c[nH]nc2c3nc4ccc(CN5CCOCC5)cc4[nH]3
