# Supplementary material for: In silico identification of novel kinase inhibitors targeting wild-type and T315I mutant ABL1 from FDA-approved drugs
Source: Royal Society of Chemistry journal article supplement (doi:10.1039/c3mb70577c), 2014-02-18
Supplement: c3mb70577c4.pdf [file c3mb70577c4.pdf]

Table S3 The time frames of each trajectory for binding free energy calculation

| Wildtype ABL1 |                 | T315I ABL1   |                 |
|---------------|-----------------|--------------|-----------------|
| Drug name     | Time frame (ns) | Drug name    | Time frame (ns) |
| Bethanechol   | 3~5             | Bethanechol  | 10~12           |
| Methacholine  | 10~12           | Methacholine | 12~14           |
| Sorafenib     | 12~14           | Plerixafor   | 10~12           |
| Nilotinib     | 12~14           | Ticlopidine  | 7~9             |
| Chlorhexidine | 8~10            | Nicergoline  | 13~15           |
| Imatinib      | 8~10            | Ponatinib    | 12~14           |
