# Supplementary material for: In silico identification of novel kinase inhibitors targeting wild-type and T315I mutant ABL1 from FDA-approved drugs
Source: Royal Society of Chemistry journal article supplement (doi:10.1039/c3mb70577c), 2014-02-18
Supplement: c3mb70577c6.xlsx [file c3mb70577c6.xlsx]

## Sheet: Sheet1
T315I Mutant ABL1
ZINC_ID	DrugBank_ID	Drug_Name	Amber_Score
ZINC03830314	DB01019	Bethanechol	-61.8649
ZINC03831050	DB06709	Methacholine	-52.4733
ZINC22443609	DB06809	Plerixafor	-50.0757
ZINC19594599	DB00208	Ticlopidine	-44.9768
ZINC03873817	DB00699	Nicergoline	-41.4559
ZINC12402582	DB01043	Memantine	-40.4875
ZINC00003742	DB01059	Norfloxacin	-40.1093
ZINC00897229	DB00232	Methyclothiazide	-40.0515
ZINC19363537	DB00375	Colestipol	-40.0323
ZINC00001894	DB00487	Pefloxacin	-38.2404
ZINC00968275	DB00726	Trimipramine	-38.1891
ZINC18098320	DB00878	Chlorhexidine	-37.9341
ZINC00020245	DB00458	Imipramine	-36.7823
ZINC00121541	DB00643	Mebendazole	-35.6618
ZINC00020244	DB00985	Dimenhydrinate	-35.4981
ZINC00000905	DB00488	Altretamine	-35.4345
ZINC01542393	DB01218	Halofantrine	-35.3635
ZINC19632927	DB00670	Pirenzepine	-35.2055
ZINC03830283	DB01244	Bepridil	-35.0059
ZINC00968266	DB01231	Diphenidol	-34.9919
ZINC01668588	DB01237	Bromodiphenhydramine	-34.8488
ZINC00000570	DB01096	Oxamniquine	-34.5813
ZINC18324776	DB00862	Vardenafil	-34.5188
ZINC22002214	DB01618	Molindone	-34.4565
ZINC33955641	DB00162	Vitamin A	-34.3436
ZINC00643153	DB01026	Ketoconazole	-34.2992
ZINC16343331	DB01131	Proguanil	-34.2185
ZINC00601293	DB01624	Zuclopenthixol	-33.9324
ZINC13763987	DB00406	Gentian Violet	-33.389
ZINC00896849	DB00777	Propiomazine	-33.2916
ZINC03812918	DB01244	Bepridil	-33.2843
ZINC00156792	DB01193	Acebutolol	-32.9537
ZINC00897232	DB00232	Methyclothiazide	-32.8327
ZINC00018635	DB00998	Frovatriptan	-32.6615
ZINC01530567	DB00195	Betaxolol	-32.6284
ZINC00003876	DB00425	Zolpidem	-32.4833
ZINC01530611	DB01151	Desipramine	-32.184
ZINC00606383	DB01153	Sertaconazole	-31.8282
ZINC01542199	DB00799	Tazarotene	-31.8111
ZINC01536779	DB00476	Duloxetine	-31.7139
ZINC19594549	DB00467	Enoxacin	-31.6152
ZINC38657182	DB00162	Vitamin A	-31.5606
ZINC19594557	DB00737	Meclizine	-31.2587
ZINC01546066	DB00530	Erlotinib	-31.1042
ZINC03871723	DB04794	Bifonazole	-31.0134
ZINC13298436	DB01029	Irbesartan	-30.978
ZINC19702119	DB00370	Mirtazapine	-30.9473
ZINC19632628	DB01224	Quetiapine	-30.7797
ZINC00001735	DB00350	Minoxidil	-30.7338
ZINC00897234	DB01021	Trichlormethiazide	-30.5944
ZINC08637880	DB00162	Vitamin A	-30.5215
ZINC02008866	DB00601	Linezolid	-30.2626
ZINC00968273	DB00376	Trihexyphenidyl	-30.2611
ZINC01530649	DB00793	Haloprogin	-30.2499
ZINC03943279	DB06695	Dabigatran etexilate	-30.2388
ZINC12484958	DB00755	Tretinoin	-30.2289
ZINC19796082	DB00805	Minaprine	-30.2274
ZINC03812923	DB00276	Amsacrine	-30.1928
ZINC00001850	DB00768	Olopatadine	-30.0574
ZINC49938464	DB00585	Nizatidine	-30.0366
ZINC00896463	DB00521	Carteolol	-29.8554
ZINC17146904	DB00518	Albendazole	-29.8031
ZINC34967244	DB01604	Pivampicillin	-29.6783
ZINC02015928	DB01048	Abacavir	-29.6488
ZINC11616581	DB01252	Mitiglinide	-29.5991
ZINC05456939	DB00755	Tretinoin	-29.5977
ZINC12484934	DB00162	Vitamin A	-29.5098
ZINC03830280	DB00767	Benzquinamide	-29.4471
ZINC00643046	DB00975	Dipyridamole	-29.3658
ZINC19632614	DB00317	Gefitinib	-29.3476
ZINC02041380	DB01090	Pentolinium	-29.295
ZINC01530660	DB01181	Ifosfamide	-29.2711
ZINC28643021	DB00875	Flupenthixol	-29.1185
ZINC01271441	DB01162	Terazosin	-28.9897
ZINC01530637	DB00472	Fluoxetine	-28.9698
ZINC00057455	DB00387	Procyclidine	-28.8765
ZINC00000471	DB00660	Metaxalone	-28.7933
ZINC03794601	DB00215	Citalopram	-28.734
ZINC03872055	DB00880	Chlorothiazide	-28.5832
ZINC00527386	DB00715	Paroxetine	-28.5813
ZINC19796018	DB00433	Prochlorperazine	-28.5243
ZINC00896836	DB01096	Oxamniquine	-28.5174
ZINC22002218	DB01618	Molindone	-28.5032
ZINC09302201	DB00755	Tretinoin	-28.2377
ZINC01851149	DB01238	Aripiprazole	-27.9442
ZINC00000242	DB00366	Doxylamine	-27.9254
ZINC03869855	DB00266	Dicumarol	-27.8682
ZINC01530694	DB00706	Tamsulosin	-27.8391
ZINC01846088	DB06288	Amisulpride	-27.8249
ZINC00897240	DB00972	Azelastine	-27.8195
ZINC09212654	DB00755	Tretinoin	-27.752
ZINC01530759	DB01182	Propafenone	-27.7112
ZINC01532179	DB00815	Sodium lauryl sulfate	-27.6711
ZINC19796158	DB00408	Loxapine	-27.5783
ZINC00523925	DB01120	Gliclazide	-27.5291
ZINC19796155	DB00363	Clozapine	-27.4225
ZINC03873364	DB06718	Stanozolol	-27.3595
ZINC01530776	DB00806	Pentoxifylline	-27.3579
ZINC03830445	DB00229	Cefotiam	-27.2099
ZINC29489118	DB00875	Flupenthixol	-27.1464
ZINC01530713	DB00577	Valaciclovir	-27.1151
ZINC19203912	DB00623	Fluphenazine	-27.059
ZINC03875393	DB04844	Tetrabenazine	-27.0543
ZINC19632603	DB01184	Domperidone	-27.0182
ZINC01530638	DB00472	Fluoxetine	-26.9205
ZINC03831404	DB00468	Quinine	-26.918
ZINC01481910	DB06714	Propylhexedrine	-26.9025
ZINC00057313	DB00749	Etodolac	-26.8173
ZINC00968257	DB00321	Amitriptyline	-26.675
ZINC03930376	DB00718	Adefovir Dipivoxil	-26.5223
ZINC06845860	DB06689	Ethanolamine Oleate	-26.4993
ZINC06845654	DB00464	Sodium Tetradecyl Sulfate	-26.4493
ZINC00002226	DB04571	Trioxsalen	-26.3073
ZINC03830999	DB00279	Liothyronine	-26.2824
ZINC13831150	DB06708	Lumefantrine	-26.2051
ZINC03831001	DB00589	Lisuride	-26.1929
ZINC22446685	DB01622	Thioproperazine	-26.1802
ZINC02016037	DB01153	Sertaconazole	-26.1473
ZINC00538065	DB01149	Nefazodone	-26.0545
ZINC01999261	DB00812	Phenylbutazone	-26.0009
ZINC13540266	DB00795	Sulfasalazine	-25.9799
ZINC19796087	DB00622	Nicardipine	-25.9439
ZINC03800706	DB00215	Citalopram	-25.9361
ZINC00601304	DB00457	Prazosin	-25.8894
ZINC00897369	DB00336	Nitrofurazone	-25.8533
ZINC00002105	DB00891	Sulfapyridine	-25.8034
ZINC00000786	DB01056	Tocainide	-25.7939
ZINC00897002	DB00296	Ropivacaine	-25.7312
ZINC03812908	DB08806	Roxatidine acetate	-25.6731
ZINC01530814	DB00297	Bupivacaine	-25.6206
ZINC30690433	DB01623	Thiothixene	-25.5999
ZINC17364045	DB00292	Etomidate	-25.5976
ZINC12503102	DB00469	Tenoxicam	-25.5508
ZINC00054567	DB01125	Anisindione	-25.5497
ZINC35342787	DB00494	Entacapone	-25.545
ZINC03830220	DB01612	Amyl Nitrite	-25.501
ZINC01612996	DB00762	Irinotecan	-25.4951
ZINC00597013	DB00843	Donepezil	-25.4658
ZINC00057060	DB01065	Melatonin	-25.4301
ZINC12503139	DB00629	Guanabenz	-25.4227
ZINC00896731	DB00744	Zileuton	-25.3523
ZINC03875543	DB00682	Warfarin	-25.3502
ZINC12503070	DB00226	Guanadrel Sulfate	-25.3284
ZINC19228902	DB00850	Perphenazine	-25.2978
ZINC03774999	DB00616	Candoxatril	-25.2531
ZINC02548959	DB00553	Methoxsalen	-25.2262
ZINC30690629	DB01145	Sulfoxone	-25.202
ZINC03830247	DB01103	Quinacrine	-25.1398
ZINC00608179	DB00913	Anileridine	-25.1187
ZINC19606670	DB01171	Moclobemide	-25.0747
ZINC19632912	DB00724	Imiquimod	-25.015
ZINC03960338	DB00980	Ramelteon	-25.0045
ZINC12503240	DB01034	Cerulenin	-24.9718
ZINC00001916	DB01121	Phenacemide	-24.8814
ZINC00154964	DB00961	Mepivacaine	-24.7458
ZINC01543873	DB02546	Vorinostat	-24.7247
ZINC04824235	DB06267	Udenafil	-24.7121
ZINC01530652	DB01611	Hydroxychloroquine	-24.7037
ZINC00001587	DB01247	Isocarboxazid	-24.6986
ZINC03802189	DB00132	Alpha-Linolenic Acid	-24.6416
ZINC00002283	DB01056	Tocainide	-24.6155
ZINC01843099	DB00346	Alfuzosin	-24.6109
ZINC01850376	DB04930	Permethrin	-24.6073
ZINC19632713	DB00393	Nimodipine	-24.591
ZINC00002042	DB00817	Rosoxacin	-24.573
ZINC01540228	DB06155	Rimonabant	-24.5316
ZINC03830246	DB01103	Quinacrine	-24.4894
ZINC03830954	DB01187	Iophendylate	-24.4088
ZINC00057062	DB00379	Mexiletine	-24.2768
ZINC21984084	DB00243	Ranolazine	-24.2661
ZINC00601274	DB00637	Astemizole	-24.2479
ZINC22116612	DB00800	Fenoldopam	-24.1234
ZINC00896569	DB00999	Hydrochlorothiazide	-24.122
ZINC34781704	DB00758	Clopidogrel	-24.1162
ZINC03830953	DB01187	Iophendylate	-24.0679
ZINC00004076	DB00952	Naratriptan	-24.0606
ZINC00897385	DB01007	Tioconazole	-24.0412
ZINC02036972	DB06706	Isometheptene	-23.9483
ZINC00006157	DB00751	Epinastine	-23.8507
ZINC00967787	DB00365	Grepafloxacin	-23.7605
ZINC01530812	DB00297	Bupivacaine	-23.7574
ZINC13298439	DB00678	Losartan	-23.7434
ZINC03871541	DB00261	Anagrelide	-23.6833
ZINC00004448	DB00904	Ondansetron	-23.6742
ZINC01999487	DB00751	Epinastine	-23.6639
ZINC01683250	DB06706	Isometheptene	-23.6163
ZINC01530939	DB00527	Dibucaine	-23.5857
ZINC00020248	DB01242	Clomipramine	-23.5604
ZINC00001925	DB00498	Phenindione	-23.4836
ZINC00601265	DB00622	Nicardipine	-23.448
ZINC05844788	DB04861	Nebivolol	-23.4239
ZINC00020221	DB00461	Nabumetone	-23.3556
ZINC02021799	DB00409	Remoxipride	-23.3346
ZINC03873936	DB00251	Terconazole	-23.2738
ZINC01530935	DB01129	Rabeprazole	-23.2648
ZINC00004778	DB00238	Nevirapine	-23.1933
ZINC03875392	DB04844	Tetrabenazine	-23.1158
ZINC01530741	DB00540	Nortriptyline	-23.0218
ZINC00896740	DB01110	Miconazole	-23.0089
ZINC00001041	DB01158	Bretylium	-22.9807
ZINC01530867	DB04572	Thiotepa	-22.9597
ZINC18456289	DB00158	Folic Acid	-22.9096
ZINC00083315	DB00150	L-Tryptophan	-22.8388
ZINC22064534	DB06712	Nilvadipine	-22.8293
ZINC03876174	DB00946	Phenprocoumon	-22.7132
ZINC00896543	DB01195	Flecainide	-22.6982
ZINC08101082	DB01613	Erythrityl Tetranitrate	-22.6978
ZINC21983537	DB00568	Cinnarizine	-22.6525
ZINC11616580	DB01252	Mitiglinide	-22.6501
ZINC00000596	DB00652	Pentazocine	-22.589
ZINC01538857	DB00559	Bosentan	-22.5586
ZINC00001748	DB00600	Monobenzone	-22.5543
ZINC01530598	DB00269	Chlorotrianisene	-22.5409
ZINC21297783	DB00225	Gadodiamide	-22.4603
ZINC00000655	DB01058	Praziquantel	-22.4307
ZINC00538415	DB04942	Tamibarotene	-22.4179
ZINC00005298	DB00315	Zolmitriptan	-22.3656
ZINC00057421	DB00779	Nalidixic Acid	-22.3548
ZINC00020237	DB00281	Lidocaine	-22.3136
ZINC00056427	DB00265	Crotamiton	-22.2708
ZINC01530764	DB00344	Protriptyline	-22.2567
ZINC00001661	DB01042	Melphalan	-22.2481
ZINC00000494	DB01214	Metipranolol	-22.2306
ZINC19364230	DB00341	Cetirizine	-22.2093
ZINC00968255	DB01193	Acebutolol	-22.1986
ZINC00896683	DB00902	Methdilazine	-22.1929
ZINC01550499	DB01012	Cinacalcet	-22.1898
ZINC00000504	DB06148	Mianserin	-22.1809
ZINC01530688	DB00934	Maprotiline	-22.1427
ZINC01482094	DB06714	Propylhexedrine	-22.0876
ZINC01530751	DB01062	Oxybutynin	-22.0718
ZINC18115268	DB00501	Cimetidine	-22.066
ZINC12503149	DB00685	Trovafloxacin	-22.0638
ZINC43677065	DB01196	Estramustine	-22.0359
ZINC01481877	DB00340	Metixene	-21.9882
ZINC00000856	DB00983	Formoterol	-21.975
ZINC00000323	DB00712	Flurbiprofen	-21.975
ZINC01530968	DB00756	Hexachlorophene	-21.9634
ZINC03831429	DB00478	Rimantadine	-21.9412
ZINC19156872	DB01176	Cyclizine	-21.9048
ZINC00003642	DB00749	Etodolac	-21.8779
ZINC00113418	DB00614	Furazolidone	-21.8762
ZINC03872735	DB00629	Guanabenz	-21.862
ZINC12358719	DB01086	Benzocaine	-21.8002
ZINC00006300	DB00962	Zaleplon	-21.7612
ZINC01530861	DB00608	Chloroquine	-21.7329
ZINC13831151	DB06708	Lumefantrine	-21.7144
ZINC03813061	DB00887	Bumetanide	-21.7121
ZINC00896512	DB00590	Doxazosin	-21.6941
ZINC03871698	DB00562	Benzthiazide	-21.6936
ZINC01851132	DB00642	Pemetrexed	-21.663
ZINC00643055	DB01127	Econazole	-21.5894
ZINC00896621	DB00579	Mazindol	-21.5859
ZINC00113382	DB00446	Chloramphenicol	-21.5621
ZINC00001331	DB01142	Doxepin	-21.5484
ZINC00000850	DB00744	Zileuton	-21.5297
ZINC00057249	DB08800	Chloropyramine	-21.4879
ZINC01481966	DB01616	Alverine	-21.4789
ZINC00075126	DB00904	Ondansetron	-21.431
ZINC13597823	DB00900	Didanosine	-21.4079
ZINC00005895	DB00953	Rizatriptan	-21.3778
ZINC02568036	DB01219	Dantrolene	-21.371
ZINC00057522	DB00525	Tolnaftate	-21.3678
ZINC00608101	DB01007	Tioconazole	-21.3395
ZINC00014360	DB00669	Sumatriptan	-21.3291
ZINC04521470	DB00154	gamma-Homolinolenic acid	-21.2878
ZINC01532131	DB00168	Aspartame	-21.2433
ZINC00020229	DB00391	Sulpiride	-21.2387
ZINC00607939	DB00270	Isradipine	-21.2207
ZINC03813024	DB01621	Pipotiazine	-21.1799
ZINC00000294	DB01191	Dexfenfluramine	-21.1349
ZINC06094354	DB00377	Palonosetron	-21.1292
ZINC00895154	DB00360	Tetrahydrobiopterin	-21.1244
ZINC03831139	DB00745	Modafinil	-21.1217
ZINC03872738	DB01018	Guanfacine	-21.0877
ZINC00057255	DB00310	Chlorthalidone	-21.0846
ZINC00056659	DB00263	Sulfisoxazole	-21.0562
ZINC01995484	DB01610	Valganciclovir	-21.0514
ZINC00105216	DB00788	Naproxen	-21.0239
ZINC22446634	DB01063	Acetophenazine	-20.9368
ZINC00001288	DB00711	Diethylcarbamazine	-20.9363
ZINC07997571	DB00614	Furazolidone	-20.9255
ZINC00537791	DB00222	Glimepiride	-20.9043
ZINC01536934	DB01207	Ridogrel	-20.8698
ZINC03875544	DB00682	Warfarin	-20.8603
ZINC00001408	DB00292	Etomidate	-20.8521
ZINC12461841	DB01120	Gliclazide	-20.7919
ZINC04467397	DB00857	Terbinafine	-20.7918
ZINC17836367	DB00742	Mannitol	-20.7715
ZINC38141759	DB01050	Ibuprofen	-20.7658
ZINC01530717	DB00264	Metoprolol	-20.72
ZINC00537805	DB01016	Glyburide	-20.6746
ZINC03876173	DB00946	Phenprocoumon	-20.666
ZINC01482197	DB00752	Tranylcypromine	-20.6645
ZINC00113389	DB00446	Chloramphenicol	-20.6337
ZINC00001370	DB01215	Estazolam	-20.6108
ZINC22446644	DB01038	Carphenazine	-20.5987
ZINC00010163	DB00185	Cevimeline	-20.5972
ZINC04311748	DB01595	Nitrazepam	-20.5785
ZINC19364224	DB00557	Hydroxyzine	-20.5765
ZINC01530697	DB00679	Thioridazine	-20.5516
ZINC00491073	DB00674	Galantamine	-20.5142
ZINC03872605	DB00176	Fluvoxamine	-20.4998
ZINC03831586	DB00726	Trimipramine	-20.488
ZINC01530695	DB00679	Thioridazine	-20.4763
ZINC54053587	DB08795	Azidocillin	-20.4418
ZINC00018087	DB00918	Almotriptan	-20.4333
ZINC00049153	DB00152	Thiamine	-20.4201
ZINC01319234	DB01346	Quinidine barbiturate	-20.394
ZINC00006016	DB00285	Venlafaxine	-20.3818
ZINC00119839	DB00848	Levamisole	-20.3553
ZINC00607971	DB01110	Miconazole	-20.3224
ZINC00001655	DB00939	Meclofenamic acid	-20.217
ZINC00896520	DB01228	Encainide	-20.2061
ZINC38140873	DB00657	Mecamylamine	-20.1725
ZINC00601242	DB00590	Doxazosin	-20.1627
ZINC00006156	DB00745	Modafinil	-20.1542
ZINC19364228	DB00354	Buclizine	-20.1293
ZINC19632718	DB00393	Nimodipine	-20.1207
ZINC03830511	DB01139	Cephapirin	-20.0498
ZINC00001246	DB00298	Dapiprazole	-20.0435
ZINC04213946	DB04861	Nebivolol	-20.0368
ZINC00113355	DB00388	Phenylephrine	-20.0355
ZINC03831483	DB01138	Sulfinpyrazone	-20.0305
ZINC01530725	DB00648	Mitotane	-20.0185
ZINC00897251	DB00843	Donepezil	-19.9786
ZINC01550477	DB01259	Lapatinib	-19.9479
ZINC01530820	DB00202	Succinylcholine	-19.9227
ZINC19802035	DB01023	Felodipine	-19.8761
ZINC02522669	DB00813	Fentanyl	-19.8572
ZINC00001982	DB01032	Probenecid	-19.8561
ZINC01530940	DB00645	Dyclonine	-19.7545
ZINC33956087	DB01088	Iloprost	-19.7505
ZINC02020233	DB00625	Efavirenz	-19.7497
ZINC38140872	DB00657	Mecamylamine	-19.7419
ZINC19227925	DB01054	Nitrendipine	-19.7157
ZINC00601316	DB00771	Clidinium	-19.6844
ZINC00020243	DB00861	Diflunisal	-19.6726
ZINC19364222	DB00557	Hydroxyzine	-19.648
ZINC00537755	DB04842	Fluspirilene	-19.6336
ZINC19632618	DB00619	Imatinib	-19.6071
ZINC01850374	DB04930	Permethrin	-19.6064
ZINC01537194	DB01102	Arbutamine	-19.5997
ZINC01542907	DB00302	Tranexamic Acid	-19.5774
ZINC01530981	DB00857	Terbinafine	-19.5183
ZINC00001175	DB00349	Clobazam	-19.5179
ZINC00601255	DB06288	Amisulpride	-19.5002
ZINC03831042	DB00933	Mesoridazine	-19.4476
ZINC00000199	DB00942	Cycrimine	-19.4174
ZINC19227923	DB01054	Nitrendipine	-19.4131
ZINC04215257	DB00430	Cefpiramide	-19.4087
ZINC04228257	DB00360	Tetrahydrobiopterin	-19.3923
ZINC01530703	DB01124	Tolbutamide	-19.3672
ZINC00001091	DB00389	Carbimazole	-19.3531
ZINC00004351	DB00920	Ketotifen	-19.3525
ZINC01530639	DB01095	Fluvastatin	-19.3025
ZINC43677057	DB01196	Estramustine	-19.2796
ZINC00006427	DB00829	Diazepam	-19.2728
ZINC00004785	DB00564	Carbamazepine	-19.2415
ZINC03079342	DB00411	Carbachol	-19.1991
ZINC03831006	DB01206	Lomustine	-19.1833
ZINC00538564	DB01128	Bicalutamide	-19.147
ZINC03873830	DB00334	Olanzapine	-19.1403
ZINC19166988	DB01168	Procarbazine	-19.0971
ZINC00057008	DB00391	Sulpiride	-19.0938
ZINC00004028	DB05271	Rotigotine	-19.0931
ZINC19796084	DB01100	Pimozide	-19.0377
ZINC00001341	DB01010	Edrophonium	-19.0311
ZINC01552174	DB01166	Cilostazol	-19.0174
ZINC22007271	DB01084	Emedastine	-18.99
ZINC15880092	DB06698	Betahistine	-18.9687
ZINC00001283	DB00890	Dienestrol	-18.96
ZINC00402830	DB00283	Clemastine	-18.9528
ZINC00968264	DB00434	Cyproheptadine	-18.9257
ZINC01530863	DB01087	Primaquine	-18.9052
ZINC01530803	DB00949	Felbamate	-18.8977
ZINC01530752	DB01062	Oxybutynin	-18.8882
ZINC00968263	DB00924	Cyclobenzaprine	-18.8826
ZINC03936683	DB01591	Solifenacin	-18.8813
ZINC01532130	DB00168	Aspartame	-18.8592
ZINC03874496	DB06803	Niclosamide	-18.8562
ZINC00391812	DB00184	Nicotine	-18.8514
ZINC00897408	DB01128	Bicalutamide	-18.8511
ZINC00897320	DB00356	Chlorzoxazone	-18.8451
ZINC03830387	DB00262	Carmustine	-18.8268
ZINC09225358	DB04880	Enoximone	-18.8154
ZINC00000575	DB00842	Oxazepam	-18.808
ZINC00896518	DB01228	Encainide	-18.799
ZINC00523926	DB01120	Gliclazide	-18.7936
ZINC00608382	DB01148	Flavoxate	-18.7796
ZINC03956788	DB00507	Nitazoxanide	-18.7745
ZINC00000096	DB00405	Dexbrompheniramine	-18.7701
ZINC00006923	DB00234	Reboxetine	-18.7629
ZINC01530799	DB00772	Malathion	-18.7477
ZINC01533874	DB01594	Cinolazepam	-18.7236
ZINC19166991	DB00780	Phenelzine	-18.7142
ZINC00020253	DB00310	Chlorthalidone	-18.6671
ZINC00000903	DB00404	Alprazolam	-18.584
ZINC17953024	DB00845	Clofazimine	-18.5603
ZINC00002176	DB00373	Timolol	-18.5575
ZINC01530570	DB00612	Bisoprolol	-18.5321
ZINC00155694	DB00531	Cyclophosphamide	-18.5251
ZINC13900201	DB01252	Mitiglinide	-18.5102
ZINC13916432	DB06267	Udenafil	-18.4881
ZINC07997952	DB00366	Doxylamine	-18.4697
ZINC00902159	DB01055	Mimosine	-18.4656
ZINC00598034	DB01162	Terazosin	-18.4515
ZINC01532339	DB01245	Decamethonium	-18.4226
ZINC22446674	DB00372	Thiethylperazine	-18.4215
ZINC01481815	DB01609	Deferasirox	-18.4027
ZINC03831531	DB00906	Tiagabine	-18.3801
ZINC03830683	DB01209	Dezocine	-18.3789
ZINC19796080	DB00450	Droperidol	-18.3616
ZINC00005626	DB04948	Lofexidine	-18.336
ZINC19850111	DB01060	Amoxicillin	-18.2968
ZINC18099446	DB00851	Dacarbazine	-18.2888
ZINC00896455	DB00835	Brompheniramine	-18.2753
ZINC18043251	DB01303 DB01223 DB00277	Oxtriphylline Aminophylline Theophylline	-18.2753
ZINC01530622	DB00869	Dorzolamide	-18.2614
ZINC00897291	DB00754	Ethotoin	-18.2597
ZINC00002041	DB00268	Ropinirole	-18.243
ZINC01543916	DB01610	Valganciclovir	-18.1939
ZINC08403947	DB00191	Phentermine	-18.1761
ZINC00002235	DB00791	Uracil mustard	-18.1664
ZINC11680943	DB01255	Lisdexamfetamine	-18.1651
ZINC03831070	DB01603	Meticillin	-18.1372
ZINC00001971	DB01588	Prazepam	-18.1303
ZINC03830316	DB00121	Biotin	-18.1246
ZINC01530762	DB00807	Proparacaine	-18.1238
ZINC12503156	DB00733	Pralidoxime	-18.1184
ZINC00968337	DB00719	Azatadine	-18.11
ZINC01493878	DB00398	Sorafenib	-18.0967
ZINC00897225	DB00774	Hydroflumethiazide	-18.0883
ZINC00001084	DB00201	Caffeine	-18.0815
ZINC00896449	DB00767	Benzquinamide	-18.0685
ZINC00587541	DB00365	Grepafloxacin	-18.0435
ZINC00056555	DB01113	Papaverine	-18.0433
ZINC04097476	DB00271	Diatrizoate	-18.0385
ZINC00057340	DB00423	Methocarbamol	-18.0194
ZINC00113439	DB00788	Naproxen	-18.0111
ZINC01530579	DB01136	Carvedilol	-17.9733
ZINC00032350	DB00827	Cinoxacin	-17.9616
ZINC00001145	DB01188	Ciclopirox	-17.9532
ZINC05004658	DB01034	Cerulenin	-17.9378
ZINC00057147	DB00651	Dyphylline	-17.9209
ZINC01853550	DB01104	Sertraline	-17.8944
ZINC00622123	DB00400	Griseofulvin	-17.8735
ZINC00057501	DB01581	Sulfamerazine	-17.8702
ZINC13863965	DB01014	Balsalazide	-17.8636
ZINC00601254	DB00524	Metolazone	-17.8616
ZINC00057493	DB00576	Sulfamethizole	-17.8411
ZINC19632610	DB01023	Felodipine	-17.8248
ZINC06716957	DB04868	Nilotinib	-17.8113
ZINC00001758	DB01024	Mycophenolic acid	-17.8028
ZINC00968303	DB00818	Propofol	-17.8003
ZINC01530718	DB00264	Metoprolol	-17.7961
ZINC13537284	DB00969	Alosetron	-17.7896
ZINC07997897	DB00735	Naftifine	-17.7709
ZINC01532614	DB00155	L-Citrulline	-17.7236
ZINC19702309	DB00697	Tizanidine	-17.7183
ZINC04258316	DB00993	Azathioprine	-17.7024
ZINC35653009	DB06209	Prasugrel	-17.697
ZINC02570895	DB00482	Celecoxib	-17.694
ZINC04632106	DB00633	Dexmedetomidine	-17.6933
ZINC00000215	DB00937	Diethylpropion	-17.6753
ZINC13831144	DB00885	Pemirolast	-17.6745
ZINC00000440	DB00579	Mazindol	-17.6681
ZINC00001677	DB00170	Menadione	-17.6632
ZINC12404516	DB00539	Toremifene	-17.6518
ZINC00057407	DB00723	Methoxamine	-17.6394
ZINC00113386	DB00446	Chloramphenicol	-17.6301
ZINC21985879	DB01252	Mitiglinide	-17.6177
ZINC00968340	DB01619	Phenindamine	-17.6078
ZINC34142545	DB06713	Norelgestromin	-17.6008
ZINC19361042	DB00737	Meclizine	-17.5877
ZINC00056556	DB00571	Propranolol	-17.5467
ZINC12503237	DB01034	Cerulenin	-17.5405
ZINC00001621	DB00431	Lindane	-17.5372
ZINC03830990	DB01202	Levetiracetam	-17.5207
ZINC00537795	DB01067	Glipizide	-17.5199
ZINC00895103	DB00156	L-Threonine	-17.4915
ZINC00001930	DB00397	Phenylpropanolamine	-17.4825
ZINC03831041	DB00933	Mesoridazine	-17.4635
ZINC02041282	DB00942	Cycrimine	-17.4618
ZINC00113442	DB00916	Metronidazole	-17.4363
ZINC12470632	DB00475	Chlordiazepoxide	-17.4045
ZINC00001131	DB01243	Chloroxine	-17.3867
ZINC01713960	DB00340	Metixene	-17.3758
ZINC00000449	DB04843	Mepenzolate	-17.3361
ZINC00000061	DB00181	Baclofen	-17.3305
ZINC00901552	DB06782	Dimercaprol	-17.2625
ZINC01530621	DB00869	Dorzolamide	-17.2581
ZINC21297660	DB00688	Mycophenolate mofetil	-17.2425
ZINC03978083	DB01199	Tubocurarine	-17.1942
ZINC00000122	DB00748	Carbinoxamine	-17.1906
ZINC12503197	DB00889	Granisetron	-17.1807
ZINC01532529	DB00134	L-Methionine	-17.1676
ZINC01530975	DB01091	Butenafine	-17.1416
ZINC11726211	DB06766	Alcaftadine	-17.125
ZINC00125031	DB04552	Niflumic Acid	-17.1234
ZINC00601229	DB00972	Azelastine	-17.101
ZINC00001798	DB00184	Nicotine	-17.0876
ZINC00001266	DB04948	Lofexidine	-16.9725
ZINC00013156	DB00555	Lamotrigine	-16.9208
ZINC03784384	DB08810	Cinitapride	-16.9179
ZINC00896868	DB00830	Phenmetrazine	-16.9159
ZINC12503099	DB00427	Triprolidine	-16.907
ZINC00002101	DB00259	Sulfanilamide	-16.9049
ZINC00896507	DB00449	Dipivefrin	-16.8579
ZINC00596881	DB01127	Econazole	-16.8504
ZINC03812974	DB01203	Nadolol	-16.8465
ZINC04640636	DB00550	Propylthiouracil	-16.8421
ZINC01482164	DB00825	Menthol	-16.833
ZINC00020257	DB00379	Mexiletine	-16.832
ZINC03810860	DB00973	Ezetimibe	-16.8261
ZINC18268128	DB01145	Sulfoxone	-16.8011
ZINC00000368	DB00725	Homatropine Methylbromide	-16.7962
ZINC00020251	DB00692	Phentolamine	-16.7894
ZINC00537822	DB00502	Haloperidol	-16.7827
ZINC12496506	DB01129	Rabeprazole	-16.7764
ZINC04363416	DB01134	Desoxycorticosterone Pivalate	-16.7202
ZINC00000095	DB01237	Bromodiphenhydramine	-16.7119
ZINC00896634	DB00231	Temazepam	-16.7091
ZINC00000941	DB01217	Anastrozole	-16.7071
ZINC00004009	DB00196	Fluconazole	-16.7035
ZINC00000480	DB00902	Methdilazine	-16.6956
ZINC01530572	DB01008	Busulfan	-16.6926
ZINC01544807	DB00166	Lipoic Acid	-16.6898
ZINC03830612	DB04838	Cyclandelate	-16.6788
ZINC00039906	DB00943	Zalcitabine	-16.6732
ZINC00155269	DB01173	Orphenadrine	-16.6673
ZINC03860453	DB00693	Fluorescein	-16.6382
ZINC00897236	DB01021	Trichlormethiazide	-16.6289
ZINC00119717	DB06711	Naphazoline	-16.6271
ZINC00001300	DB08792	Diloxanide	-16.6216
ZINC00897322	DB00660	Metaxalone	-16.5949
ZINC00001137	DB01239	Chlorprothixene	-16.5923
ZINC00402979	DB00221	Isoetharine	-16.5743
ZINC01842633	DB00289	Atomoxetine	-16.559
ZINC00002097	DB00664	Sulfametopyrazine	-16.5459
ZINC02015035	DB06262	Droxidopa	-16.5448
ZINC01530726	DB00648	Mitotane	-16.5325
ZINC01567421	DB01071	Mequitazine	-16.5169
ZINC00896918	DB01144	Dichlorphenamide	-16.5044
ZINC00001681	DB00454	Meperidine	-16.4601
ZINC02032615	DB04930	Permethrin	-16.4555
ZINC03874185	DB00358	Mefloquine	-16.4021
ZINC00020240	DB00571	Propranolol	-16.3983
ZINC04363405	DB01134	Desoxycorticosterone Pivalate	-16.3889
ZINC00006481	DB00740	Riluzole	-16.3789
ZINC00001863	DB00991	Oxaprozin	-16.3683
ZINC02539827	DB00360	Tetrahydrobiopterin	-16.3462
ZINC00113410	DB01114	Chlorpheniramine	-16.3424
ZINC00001612	DB01191	Dexfenfluramine	-16.3118
ZINC00000607	DB01620	Pheniramine	-16.3032
ZINC00001021	DB00676	Benzyl Benzoate	-16.3002
ZINC01542392	DB00346	Alfuzosin	-16.2987
ZINC33971762	DB00981	Physostigmine	-16.2771
ZINC00001267	DB00422	Methylphenidate	-16.2681
ZINC00057198	DB01614	Acepromazine	-16.2542
ZINC04102315	DB01034	Cerulenin	-16.2391
ZINC03594299	DB04840	Debrisoquin	-16.1977
ZINC13233295	DB06150	Sulfadimethoxine	-16.1664
ZINC00000271	DB00754	Ethotoin	-16.1571
ZINC03798537	DB00912	Repaglinide	-16.1331
ZINC00044027	DB00477	Chlorpromazine	-16.1216
ZINC01530701	DB00371	Meprobamate	-16.0849
ZINC03830212	DB01118	Amiodarone	-16.0846
ZINC00056653	DB01064	Isoproterenol	-16.0485
ZINC19632633	DB01037	Selegiline	-16.0456
ZINC07997592	DB00890	Dienestrol	-16.0416
ZINC04228258	DB00360	Tetrahydrobiopterin	-16.0402
ZINC35379666	DB00542	Benazepril	-16.0395
ZINC03775140	DB00604	Cisapride	-16.0069
ZINC00009342	DB06700	Desvenlafaxine	-16.0042
ZINC00033882	DB00988	Dopamine	-15.9579
ZINC12859773	DB00331	Metformin	-15.9561
ZINC00120249	DB00147	Pyridoxal	-15.9484
ZINC04016817	DB06751	Drotaverine	-15.9436
ZINC43677060	DB01196	Estramustine	-15.9172
ZINC01481714	DB01615	Aceprometazine	-15.909
ZINC37868619	DB08802	Isothipendyl	-15.8802
ZINC04676424	DB00213	Pantoprazole	-15.8724
ZINC00057341	DB00423	Methocarbamol	-15.828
ZINC00001290	DB00255	Diethylstilbestrol	-15.8214
ZINC00000431	DB00186	Lorazepam	-15.8164
ZINC01532132	DB00168	Aspartame	-15.8052
ZINC00000106	DB08808	Bupranolol	-15.7974
ZINC01530886	DB00966	Telmisartan	-15.7801
ZINC01999544	DB01580	Oxprenolol	-15.7103
ZINC00001385	DB01031	Ethinamate	-15.6532
ZINC00089763	DB01015	Sulfamethoxazole	-15.626
ZINC00388396	DB00149	L-Leucine	-15.6154
ZINC01530753	DB00236	Pipobroman	-15.5161
ZINC03812958	DB04794	Bifonazole	-15.5128
ZINC31261349	DB01239	Chlorprothixene	-15.4772
ZINC00642908	DB00522	Bentiromide	-15.4735
ZINC00001261	DB00967	Desloratadine	-15.4677
ZINC35342789	DB00323	Tolcapone	-15.4548
ZINC00057464	DB00205	Pyrimethamine	-15.4535
ZINC02034892	DB00473	Hexylcaine	-15.433
ZINC00000023	DB00866	Alprenolol	-15.4092
ZINC00056645	DB00960	Pindolol	-15.3642
ZINC00897085	DB00358	Mefloquine	-15.3284
ZINC00643114	DB00808	Indapamide	-15.3128
ZINC04474603	DB00159	Icosapent	-15.3058
ZINC00020259	DB00852	Pseudoephedrine	-15.2403
ZINC12402836	DB00882	Clomifene	-15.2206
ZINC00538159	DB01608	Propericiazine	-15.2121
ZINC00897283	DB00189	Ethchlorvynol	-15.1832
ZINC21303210	DB00484	Brimonidine	-15.1602
ZINC00012346	DB00709	Lamivudine	-15.1579
ZINC00004234	DB05266	Ibudilast	-15.1478
ZINC03830339	DB01210	Levobunolol	-15.1249
ZINC03872317	DB00449	Dipivefrin	-15.1091
ZINC00000740	DB00231	Temazepam	-15.1083
ZINC00001115	DB00291	Chlorambucil	-15.103
ZINC00039092	DB01094	Hesperetin	-15.0956
ZINC38664631	DB00890	Dienestrol	-15.0944
ZINC00035804	DB00695	Furosemide	-15.0613
ZINC00057533	DB00809	Tropicamide	-15.0492
ZINC00020255	DB00968	Methyldopa	-15.0483
ZINC02011568	DB01071	Mequitazine	-14.9981
ZINC00508068	DB01620	Pheniramine	-14.9594
ZINC00001590	DB00951	Isoniazid	-14.9448
ZINC00968338	DB01619	Phenindamine	-14.9278
ZINC04363409	DB01134	Desoxycorticosterone Pivalate	-14.9137
ZINC00002043	DB00748	Carbinoxamine	-14.8906
ZINC00057146	DB00651	Dyphylline	-14.7765
ZINC00125006	DB00797	Tolazoline	-14.7696
ZINC03778874	DB01006	Letrozole	-14.7023
ZINC19230190	DB00592	Piperazine	-14.6852
ZINC49583080	DB00204	Dofetilide	-14.6825
ZINC01530569	DB00612	Bisoprolol	-14.6064
ZINC34676245	DB00260	Cycloserine	-14.6005
ZINC03831430	DB00478	Rimantadine	-14.566
ZINC00057409	DB00723	Methoxamine	-14.5196
ZINC00584092	DB01039	Fenofibrate	-14.465
ZINC00020228	DB01156	Bupropion	-14.4576
ZINC19796041	DB00381	Amlodipine	-14.4326
ZINC01530772	DB00617	Paramethadione	-14.428
ZINC00538550	DB00246	Ziprasidone	-14.3801
ZINC03830485	DB01112	Cefuroxime	-14.372
ZINC00016827	DB00382	Tacrine	-14.3479
ZINC00113378	DB00446	Chloramphenicol	-14.2998
ZINC00000267	DB00189	Ethchlorvynol	-14.2706
ZINC01532129	DB00168	Aspartame	-14.2403
ZINC00896698	DB00285	Venlafaxine	-14.227
ZINC02032320	DB08807	Bopindolol	-14.2031
ZINC15668997	DB04861	Nebivolol	-14.1911
ZINC01530555	DB00787	Acyclovir	-14.1822
ZINC00509440	DB00842	Oxazepam	-14.1565
ZINC19360739	DB04841	Flunarizine	-14.1366
ZINC00057175	DB00964	Apraclonidine	-14.1346
ZINC01187543	DB00763	Methimazole	-14.1335
ZINC00012342	DB00179	Masoprocol	-14.1238
ZINC00403010	DB00598	Labetalol	-14.0932
ZINC00113446	DB00911	Tinidazole	-14.0855
ZINC02041046	DB00217	Bethanidine	-14.0846
ZINC18085533	DB00352	Thioguanine	-14.0806
ZINC03201907	DB00514	Dextromethorphan	-14.0592
ZINC00137884	DB00649	Stavudine	-14.0317
ZINC00074836	DB01364	Ephedrine	-14.0299
ZINC03079337	DB00122	Choline	-13.9716
ZINC00000931	DB00543	Amoxapine	-13.9638
ZINC21984080	DB01025	Amlexanox	-13.9507
ZINC00001505	DB01004	Ganciclovir	-13.9426
ZINC03629271	DB00879	Emtricitabine	-13.8841
ZINC02510358	DB00252	Phenytoin	-13.8622
ZINC06021033	DB00182	Amphetamine	-13.8471
ZINC00897288	DB01213	Fomepizole	-13.8366
ZINC00003911	DB00841	Dobutamine	-13.8312
ZINC00537752	DB00690	Flurazepam	-13.8307
ZINC12503159	DB00757	Dolasetron	-13.811
ZINC00002276	DB08808	Bupranolol	-13.8103
ZINC19364229	DB00341	Cetirizine	-13.7809
ZINC01530654	DB01611	Hydroxychloroquine	-13.7726
ZINC00000404	DB08802	Isothipendyl	-13.7581
ZINC01530977	DB00735	Naftifine	-13.7457
ZINC00897258	DB00983	Formoterol	-13.7391
ZINC00056721	DB00311	Ethoxzolamide	-13.7373
ZINC00968305	DB00865	Benzphetamine	-13.7343
ZINC00000135	DB00856	Chlorphenesin	-13.715
ZINC19632891	DB00568	Cinnarizine	-13.7103
ZINC01487602	DB00658	Sevelamer	-13.7053
ZINC34781666	DB00415	Ampicillin	-13.7003
ZINC00129343	DB00856	Chlorphenesin	-13.69
ZINC01530771	DB00617	Paramethadione	-13.6862
ZINC05513434	DB00374	Treprostinil	-13.664
ZINC00403079	DB00211	Midodrine	-13.6638
ZINC04658290	DB01033	Mercaptopurine	-13.6598
ZINC03645145	DB00149	L-Leucine	-13.6388
ZINC01482162	DB08801	Dimethindene	-13.631
ZINC33342870	DB01140	Cefadroxil	-13.6264
ZINC00056651	DB00392	Ethopropazine	-13.6052
ZINC03831165	DB01203	Nadolol	-13.5871
ZINC00968301	DB00986	Glycopyrrolate	-13.5815
ZINC00896988	DB01028	Methoxyflurane	-13.5491
ZINC00056652	DB01064	Isoproterenol	-13.5401
ZINC00020241	DB00784	Mefenamic acid	-13.5232
ZINC00057408	DB00723	Methoxamine	-13.514
ZINC00001695	DB00610	Metaraminol	-13.4582
ZINC00000128	DB00521	Carteolol	-13.4519
ZINC00538483	DB00656	Trazodone	-13.4116
ZINC00105196	DB00120	L-Phenylalanine	-13.4116
ZINC00266964	DB00135	L-Tyrosine	-13.4103
ZINC00004413	DB00989	Rivastigmine	-13.4001
ZINC00896484	DB00575	Clonidine	-13.3431
ZINC00007601	DB01001	Salbutamol	-13.3286
ZINC39949130	DB00353	Methylergonovine	-13.3136
ZINC00601291	DB01587	Ketazolam	-13.2975
ZINC01530659	DB01181	Ifosfamide	-13.2866
ZINC49089868	DB06725	Lornoxicam	-13.2807
ZINC00000808	DB01246	Trimeprazine	-13.2467
ZINC00621893	DB00343	Diltiazem	-13.2435
ZINC19796168	DB00203	Sildenafil	-13.235
ZINC07997568	DB00698	Nitrofurantoin	-13.2289
ZINC14294279	DB00275	Olmesartan	-13.2284
ZINC00896968	DB00986	Glycopyrrolate	-13.2263
ZINC03873362	DB06718	Stanozolol	-13.2093
ZINC03581355	DB00167	L-Isoleucine	-13.1937
ZINC00001899	DB00299	Penciclovir	-13.1699
ZINC00896958	DB00986	Glycopyrrolate	-13.1632
ZINC00537811	DB00801	Halazepam	-13.1497
ZINC00001281	DB00586	Diclofenac	-13.1331
ZINC00896755	DB00524	Metolazone	-13.1307
ZINC00537891	DB01165	Ofloxacin	-13.1064
ZINC18010484	DB00742	Mannitol	-13.1024
ZINC04475353	DB00605	Sulindac	-13.1019
ZINC00120319	DB05245 DB00359	Silver sulfadiazine Sulfadiazine	-13.0993
ZINC00000469	DB00816	Orciprenaline	-13.0494
ZINC04658553	DB00160	L-Alanine	-13.0392
ZINC01530641	DB01241	Gemfibrozil	-13.026
ZINC00000565	DB01173	Orphenadrine	-13.0128
ZINC08214496	DB08795	Azidocillin	-12.972
ZINC01542901	DB08807	Bopindolol	-12.9705
ZINC00004227	DB00392	Ethopropazine	-12.9461
ZINC03806104	DB00775	Tirofiban	-12.9278
ZINC01530619	DB00869	Dorzolamide	-12.8845
ZINC00057480	DB00867	Ritodrine	-12.8595
ZINC01530817	DB00750	Prilocaine	-12.8265
ZINC00000196	DB00979	Cyclopentolate	-12.8138
ZINC05316843	DB08810	Cinitapride	-12.7668
ZINC13298313	DB00437	Allopurinol	-12.76
ZINC00057206	DB01156	Bupropion	-12.7342
ZINC22447798	DB00538	Gadoversetamide	-12.7196
ZINC03782818	DB00796	Candesartan	-12.7193
ZINC08220828	DB01159	Halothane	-12.7105
ZINC00001732	DB00683	Midazolam	-12.7047
ZINC01529425	DB00513	Aminocaproic Acid	-12.7031
ZINC13523046	DB04876	Vildagliptin	-12.7026
ZINC00896887	DB00832	Phensuximide	-12.6648
ZINC00403566	DB01058	Praziquantel	-12.6585
ZINC00896546	DB01099	Flucytosine	-12.6297
ZINC00056643	DB01146	Diphenylpyraline	-12.6139
ZINC00056648	DB00636	Clofibrate	-12.6138
ZINC05162311	DB06802	Nepafenac	-12.5427
ZINC00057524	DB00792	Tripelennamine	-12.5162
ZINC12503208	DB00895	Benzylpenicilloyl Polylysine	-12.513
ZINC00119344	DB00345	Aminohippurate	-12.5098
ZINC00113415	DB00335	Atenolol	-12.4913
ZINC00896487	DB00628	Clorazepate	-12.4879
ZINC00968330	DB00412	Rosiglitazone	-12.4738
ZINC03830891	DB00143	Glutathione	-12.4628
ZINC18067894	DB00414	Acetohexamide	-12.4504
ZINC01530932	DB00940	Methantheline	-12.4503
ZINC01532673	DB00138	L-Cystine	-12.4177
ZINC03830986	DB00448	Lansoprazole	-12.4142
ZINC00000853	DB00193	Tramadol	-12.3646
ZINC18153101	DB00837	Progabide	-12.3526
ZINC00020250	DB01069	Promethazine	-12.3187
ZINC00000882	DB00173	Adenine	-12.2894
ZINC00001028	DB00272	Betazole	-12.2633
ZINC00057512	DB00839	Tolazamide	-12.2619
ZINC03831282	DB00417	Penicillin V	-12.2372
ZINC00895360	DB00172	L-Proline	-12.2286
ZINC00000353	DB00874	Guaifenesin	-12.2166
ZINC00000257	DB00187	Esmolol	-12.2121
ZINC36382071	DB00447	Loracarbef	-12.1903
ZINC00002009	DB00545	Pyridostigmine	-12.1845
ZINC34676244	DB00260	Cycloserine	-12.1722
ZINC00394284	DB00874	Guaifenesin	-12.155
ZINC00008667	DB00712	Flurbiprofen	-12.1419
ZINC02036848	DB00140	Riboflavin	-12.0972
ZINC00896873	DB00830	Phenmetrazine	-12.0899
ZINC00004724	DB00776	Oxcarbazepine	-12.059
ZINC18274777	DB00316	Acetaminophen	-12.058
ZINC00057406	DB00723	Methoxamine	-12.0542
ZINC00056544	DB00255	Diethylstilbestrol	-12.0042
ZINC00004760	DB00387	Procyclidine	-11.9678
ZINC03830261	DB01061	Azlocillin	-11.9605
ZINC02019492	DB00892	Oxybuprocaine	-11.9485
ZINC00006310	DB00250	Dapsone	-11.9444
ZINC04097392	DB01189	Desflurane	-11.934
ZINC04099200	DB00213	Pantoprazole	-11.923
ZINC12466469	DB00554	Piroxicam	-11.8982
ZINC01530756	DB01035	Procainamide	-11.8972
ZINC00538266	DB01589	Quazepam	-11.8967
ZINC03830842	DB01195	Flecainide	-11.8897
ZINC00968328	DB00412	Rosiglitazone	-11.8525
ZINC00057254	DB04837	Chlophedianol	-11.8446
ZINC00057278	DB00841	Dobutamine	-11.8222
ZINC12503133	DB00605	Sulindac	-11.8069
ZINC00056646	DB00960	Pindolol	-11.7889
ZINC02599970	DB00983	Formoterol	-11.7555
ZINC08214587	DB00677	Isoflurophate	-11.7191
ZINC00005151	DB05271	Rotigotine	-11.6662
ZINC12503190	DB00876	Eprosartan	-11.6534
ZINC01530862	DB01087	Primaquine	-11.6404
ZINC01530599	DB00672	Chlorpropamide	-11.6343
ZINC00896595	DB00186	Lorazepam	-11.615
ZINC00004840	DB01097	Leflunomide	-11.6024
ZINC00005560	DB01009	Ketoprofen	-11.6005
ZINC00010402	DB00420	Promazine	-11.5653
ZINC00901555	DB06782	Dimercaprol	-11.5407
ZINC01530860	DB00608	Chloroquine	-11.5299
ZINC00897256	DB00983	Formoterol	-11.5099
ZINC03830611	DB04838	Cyclandelate	-11.4977
ZINC03876068	DB00474	Methohexital	-11.495
ZINC01639567	DB00752	Tranylcypromine	-11.4911
ZINC03777838	DB01594	Cinolazepam	-11.468
ZINC03873366	DB06718	Stanozolol	-11.4678
ZINC00402980	DB00221	Isoetharine	-11.4623
ZINC00002232	DB08803	Tymazoline	-11.4571
ZINC03831403	DB01346	Quinidine barbiturate	-11.4523
ZINC00896485	DB00628	Clorazepate	-11.4397
ZINC00056647	DB01069	Promethazine	-11.421
ZINC03813003	DB01068	Clonazepam	-11.3949
ZINC00895042	DB00151	L-Cysteine	-11.3587
ZINC00000456	DB00961	Mepivacaine	-11.3424
ZINC43677062	DB01196	Estramustine	-11.2788
ZINC00968274	DB00376	Trihexyphenidyl	-11.0997
ZINC00896709	DB00422	Methylphenidate	-11.086
ZINC00020235	DB00821	Carprofen	-11.0295
ZINC00120286	DB00384	Triamterene	-11.024
ZINC00020260	DB00383	Oxyphencyclimine	-10.9993
ZINC12466082	DB00176	Fluvoxamine	-10.987
ZINC02522648	DB00422	Methylphenidate	-10.9856
ZINC03830347	DB00241	Butalbital	-10.9769
ZINC03812960	DB00753	Isoflurane	-10.9549
ZINC00968327	DB01132	Pioglitazone	-10.9452
ZINC00968326	DB01132	Pioglitazone	-10.943
ZINC01481789	DB08801	Dimethindene	-10.9015
ZINC38142440	DB00447	Loracarbef	-10.8946
ZINC01530929	DB00474	Methohexital	-10.886
ZINC01532522	DB00123	L-Lysine	-10.8753
ZINC00608204	DB00522	Bentiromide	-10.8592
ZINC03871701	DB01053	Penicillin G	-10.8245
ZINC00538507	DB00508	Triflupromazine	-10.8172
ZINC19632834	DB01198 DB00402	Zopiclone Eszopiclone	-10.7784
ZINC00020230	DB01001	Salbutamol	-10.7669
ZINC21985213	DB00380	Dexrazoxane	-10.7339
ZINC08214397	DB01159	Halothane	-10.7015
ZINC03779720	DB05265	Ecabet	-10.6526
ZINC03872952	DB00753	Isoflurane	-10.6181
ZINC00002212	DB00897	Triazolam	-10.6045
ZINC00601310	DB01138	Sulfinpyrazone	-10.5907
ZINC01530710	DB00347	Trimethadione	-10.5808
ZINC00968256	DB00915	Amantadine	-10.5388
ZINC38212689	DB00544	Fluorouracil	-10.4929
ZINC00601305	DB00808	Indapamide	-10.4754
ZINC18178475	DB01613	Erythrityl Tetranitrate	-10.4748
ZINC32709485	DB00613	Amodiaquine	-10.4274
ZINC00001673	DB01042	Melphalan	-10.4155
ZINC00000746	DB00871	Terbutaline	-10.4139
ZINC01530689	DB00675	Tamoxifen	-10.3745
ZINC00085733	DB00181	Baclofen	-10.3616
ZINC18217584	DB00667	Histamine Phosphate	-10.3591
ZINC00538273	DB01137	Levofloxacin	-10.3544
ZINC01530816	DB00750	Prilocaine	-10.3451
ZINC02016052	DB00658	Sevelamer	-10.3204
ZINC00034157	DB06707	Levonordefrin	-10.2759
ZINC01530950	DB00395	Carisoprodol	-10.2731
ZINC22001248	DB00270	Isradipine	-10.2359
ZINC00403567	DB00824	Enprofylline	-10.2211
ZINC00597260	DB06712	Nilvadipine	-10.1521
ZINC00000346	DB00986	Glycopyrrolate	-10.0268
ZINC00057532	DB00809	Tropicamide	-10.0257
ZINC01850377	DB04930	Permethrin	-10.012
ZINC00057439	DB00383	Oxyphencyclimine	-10.0087
ZINC03812964	DB00228	Enflurane	-9.97284
ZINC04676236	DB00633	Dexmedetomidine	-9.91034
ZINC04095696	DB01597	Cilastatin	-9.909
ZINC01530568	DB00195	Betaxolol	-9.8495
ZINC03813083	DB04843	Mepenzolate	-9.84373
ZINC01530628	DB01057	Echothiophate	-9.80585
ZINC04468780	DB00493	Cefotaxime	-9.78962
ZINC00073711	DB00730	Thiabendazole	-9.68825
ZINC00000609	DB00830	Phenmetrazine	-9.64584
ZINC00113404	DB01114	Chlorpheniramine	-9.59916
ZINC00057624	DB00368	Norepinephrine	-9.58431
ZINC04214740	DB00546	Adinazolam	-9.5666
ZINC28631694	DB00895	Benzylpenicilloyl Polylysine	-9.54295
ZINC08101083	DB01613	Erythrityl Tetranitrate	-9.50865
ZINC01530866	DB01218	Halofantrine	-9.50702
ZINC00968306	DB00865	Benzphetamine	-9.4492
ZINC01530757	DB00721	Procaine	-9.41293
ZINC00599734	DB00448	Lansoprazole	-9.37704
ZINC08214625	DB00727	Nitroglycerin	-9.35061
ZINC00014037	DB04896	Milnacipran	-9.33593
ZINC00057253	DB04837	Chlophedianol	-9.32994
ZINC00020220	DB00537	Ciprofloxacin	-9.31578
ZINC03872277	DB01119	Diazoxide	-9.27019
ZINC00155531	DB00979	Cyclopentolate	-9.20805
ZINC01530806	DB00593	Ethosuximide	-9.19789
ZINC03915645	DB00922	Levosimendan	-9.1824
ZINC03871703	DB04890	Bepotastine	-9.17265
ZINC31356637	DB00605	Sulindac	-9.10015
ZINC00002281	DB00871	Terbutaline	-9.0392
ZINC00057494	DB01582	Sulfamethazine	-9.03028
ZINC03798750	DB01080	Vigabatrin	-9.01751
ZINC12503222	DB00927	Famotidine	-8.99022
ZINC00000453	DB00532	Mephenytoin	-8.83971
ZINC00039089	DB00668	Epinephrine	-8.81428
ZINC13473744	DB00348	Nitisinone	-8.77341
ZINC19632839	DB01198	Zopiclone	-8.71929
ZINC02847375	DB00937	Diethylpropion	-8.70438
ZINC01530620	DB00869	Dorzolamide	-8.65771
ZINC12503073	DB00226	Guanadrel Sulfate	-8.64454
ZINC03872449	DB00228	Enflurane	-8.60827
ZINC06661227	DB00117	L-Histidine	-8.56139
ZINC03873365	DB06718	Stanozolol	-8.55752
ZINC33963598	DB01170	Guanethidine	-8.55737
ZINC01530800	DB00772	Malathion	-8.55101
ZINC19364221	DB00330	Ethambutol	-8.50742
ZINC22116608	DB00800	Fenoldopam	-8.50387
ZINC01530580	DB01136	Carvedilol	-8.40962
ZINC03776875	DB01189	Desflurane	-8.39102
ZINC00001728	DB01011	Metyrapone	-8.34787
ZINC00049154	DB00165	Pyridoxine	-8.34756
ZINC00057204	DB08799	Antazoline	-8.33557
ZINC01530805	DB00593	Ethosuximide	-8.32112
ZINC01530716	DB01233	Metoclopramide	-8.29163
ZINC01698105	DB08796	Pipazethate	-8.27014
ZINC05508997	DB00463	Metharbital	-8.23974
ZINC08766756	DB00849	Methylphenobarbital	-8.20011
ZINC00086599	DB00866	Alprenolol	-8.17797
ZINC01482039	DB00729	Diphemanil Methylsulfate	-8.17079
ZINC03589203	DB06151	Acetylcysteine	-8.13434
ZINC01542924	DB01580	Oxprenolol	-8.1019
ZINC14438802	DB00126	Vitamin C	-8.02559
ZINC12503147	DB00671	Cefixime	-8.01882
ZINC08034121	DB00847	Cysteamine	-7.94357
ZINC00896703	DB05246	Methsuximide	-7.89905
ZINC01530951	DB00395	Carisoprodol	-7.89504
ZINC00004321	DB00909	Zonisamide	-7.88288
ZINC00895034	DB00133	L-Serine	-7.83618
ZINC01855421	DB00192	Indecainide	-7.82226
ZINC01530760	DB01182	Propafenone	-7.82112
ZINC28467879	DB01212	Ceftriaxone	-7.80346
ZINC00403618	DB01080	Vigabatrin	-7.78933
ZINC00000133	DB01178	Chlormezanone	-7.68753
ZINC00896648	DB00532	Mephenytoin	-7.63218
ZINC09224016	DB00235	Milrinone	-7.43167
ZINC19796039	DB00381	Amlodipine	-7.42502
ZINC35024383	DB00833	Cefaclor	-7.4141
ZINC01530930	DB00474	Methohexital	-7.38597
ZINC38141396	DB00305	Mitomycin	-7.38437
ZINC00403011	DB00598	Labetalol	-7.37927
ZINC02525885	DB06700	Desvenlafaxine	-7.36636
ZINC01482184	DB00853	Temozolomide	-7.3495
ZINC03830564	DB00604	Cisapride	-7.32361
ZINC00004319	DB00598	Labetalol	-7.24247
ZINC00014257	DB05246	Methsuximide	-7.22255
ZINC01530938	DB01161	Chloroprocaine	-7.18958
ZINC00602128	DB04890	Bepotastine	-7.17835
ZINC11616796	DB01155	Gemifloxacin	-7.0967
ZINC03873296	DB00239	Oxiconazole	-7.08775
ZINC01530605	DB01003	Cromoglicic acid	-7.05035
ZINC03830437	DB00493	Cefotaxime	-7.02847
ZINC34781667	DB00567	Cephalexin	-7.02515
ZINC03871927	DB00267	Cefmenoxime	-6.85157
ZINC00057302	DB08798	Sulfamoxole	-6.84699
ZINC02041302	DB00742	Mannitol	-6.817
ZINC01997127	DB00480	Lenalidomide	-6.81658
ZINC00537964	DB00358	Mefloquine	-6.80914
ZINC00402909	DB00573	Fenoprofen	-6.79047
ZINC00005152	DB00230	Pregabalin	-6.74474
ZINC21982937	DB00743	Gadobenate Dimeglumine	-6.74353
ZINC22016981	DB00597	Gadoteridol	-6.74222
ZINC00002279	DB00465	Ketorolac	-6.71407
ZINC03775644	DB01123	Proflavine	-6.68977
ZINC00114127	DB00859	Penicillamine	-6.68716
ZINC26894874	DB01219	Dantrolene	-6.66071
ZINC04658552	DB00145	Glycine	-6.60715
ZINC13129998	DB00814	Meloxicam	-6.5997
ZINC00011012	DB00465	Ketorolac	-6.57929
ZINC03876069	DB00474	Methohexital	-6.56198
ZINC00001979	DB00794	Primidone	-6.5398
ZINC00121458	DB06147	Sulfathiazole	-6.47127
ZINC00000301	DB00573	Fenoprofen	-6.46558
ZINC01869694	DB00821	Carprofen	-6.43343
ZINC35653007	DB06209	Prasugrel	-6.42784
ZINC00000507	DB00211	Midodrine	-6.37026
ZINC19594535	DB01140	Cefadroxil	-6.34581
ZINC00896681	DB01246	Trimeprazine	-6.13449
ZINC19594578	DB01115	Nifedipine	-6.13022
ZINC00000053	DB00945	Acetylsalicylic acid	-6.06967
ZINC00000767	DB01600	Tiaprofenic acid	-5.96796
ZINC00002273	DB00816	Orciprenaline	-5.82366
ZINC30690638	DB01145	Sulfoxone	-5.69517
ZINC20444137	DB00710	Ibandronate	-5.61163
ZINC02012726	DB01587	Ketazolam	-5.58314
ZINC35024386	DB01140	Cefadroxil	-5.50274
ZINC19364219	DB00330	Ethambutol	-5.36615
ZINC00000922	DB00233	Aminosalicylic Acid	-5.32153
ZINC01529266	DB00822	Disulfiram	-5.25208
ZINC12503187	DB00872	Conivaptan	-5.20008
ZINC00001464	DB01205	Flumazenil	-5.18876
ZINC00896870	DB00830	Phenmetrazine	-5.12566
ZINC00896711	DB00422	Methylphenidate	-5.08609
ZINC03782550	DB00855	Aminolevulinic acid	-5.05218
ZINC01530947	DB01041	Thalidomide	-5.0037
ZINC00389149	DB01214	Metipranolol	-4.92719
ZINC01531036	DB00548	Azelaic Acid	-4.89986
ZINC19168887	DB00190	Carbidopa	-4.89116
ZINC03831107	DB01107	Methyprylon	-4.87204
ZINC00601283	DB00328	Indomethacin	-4.86662
ZINC12503076	DB00265	Crotamiton	-4.81629
ZINC05224188	DB01093	Dimethyl sulfoxide	-4.8072
ZINC00075008	DB01085	Pilocarpine	-4.79087
ZINC33965961	DB00743	Gadobenate Dimeglumine	-4.76781
ZINC08766760	DB00849	Methylphenobarbital	-4.74109
ZINC03008621	DB00313	Valproic Acid	-4.61582
ZINC35395414	DB00689	Cephaloglycin	-4.5647
ZINC01532526	DB00130	L-Glutamine	-4.51708
ZINC08034120	DB01005	Hydroxyurea	-4.49956
ZINC00002055	DB08797	Salicylamide	-4.47028
ZINC00402981	DB00221	Isoetharine	-4.38296
ZINC00001382	DB00903	Ethacrynic acid	-4.32322
ZINC03812865	DB01250	Olsalazine	-4.27698
ZINC00000693	DB00765	Metyrosine	-4.27202
ZINC00000416	DB00598	Labetalol	-4.2581
ZINC00000401	DB00221	Isoetharine	-4.24167
ZINC04658603	DB00551	Acetohydroxamic Acid	-4.23044
ZINC01532525	DB00125	L-Arginine	-4.15191
ZINC03830417	DB00274	Cefmetazole	-4.12586
ZINC00002272	DB01009	Ketoprofen	-4.01515
ZINC01530948	DB01041	Thalidomide	-4.01302
ZINC03137566	DB01174	Phenobarbital	-4.01237
ZINC35024381	DB00833	Cefaclor	-4.00803
ZINC00579472	DB01628	Etoricoxib	-4.00292
ZINC01909090	DB00992	Methyl aminolevulinate	-3.88541
ZINC03920719	DB01076	Atorvastatin	-3.86878
ZINC00014007	DB00335	Atenolol	-3.82897
ZINC02019621	DB01615	Aceprometazine	-3.80599
ZINC00001795	DB00627	Niacin	-3.75301
ZINC01481831	DB06268	Sitaxentan	-3.66873
ZINC00001554	DB00936	Salicyclic acid	-3.60737
ZINC12495103	DB00144	Phosphatidylserine	-3.59352
ZINC00002282	DB01600	Tiaprofenic acid	-3.54807
ZINC13513942	DB00116	Tetrahydrofolic acid	-3.41882
ZINC03831352	DB00413	Pramipexole	-3.34392
ZINC13513943	DB00116	Tetrahydrofolic acid	-3.28942
ZINC12503242	DB01040	Hydroxystilbamidine Isethionate	-3.26297
ZINC02570817	DB00963	Bromfenac	-3.1526
ZINC12484909	DB00144	Phosphatidylserine	-3.04467
ZINC38141758	DB01050	Ibuprofen	-3.03401
ZINC03830434	DB00923	Ceforanide	-3.02497
ZINC01554588	DB00659	Acamprosate	-2.95671
ZINC02519740	DB06716	Fospropofol	-2.7869
ZINC22921371	DB00330	Ethambutol	-2.7843
ZINC12503206	DB00895	Benzylpenicilloyl Polylysine	-2.76318
ZINC01529323	DB00563	Methotrexate	-2.74804
ZINC00002005	DB00339	Pyrazinamide	-2.65184
ZINC03831120	DB00948	Mezlocillin	-2.57907
ZINC03604264	DB00480	Lenalidomide	-2.36293
ZINC01530810	DB01236	Sevoflurane	-2.27058
ZINC02539484	DB00888	Mechlorethamine	-1.63038
ZINC33943584	DB01140	Cefadroxil	-1.56659
ZINC00538337	DB06144	Sertindole	-1.56146
ZINC18279893	DB00742	Mannitol	-1.37424
ZINC00057503	DB00870	Suprofen	-1.35867
ZINC01532556	DB00174	L-Asparagine	-1.3354
ZINC18279672	DB00293	Raltitrexed	-1.31941
ZINC03831474	DB00566	Succimer	-1.12596
ZINC00896523	DB00187	Esmolol	-1.12182
ZINC03871960	DB00438	Ceftazidime	-1.09014
ZINC01539579	DB00307	Bexarotene	-1.02944
ZINC03831475	DB00566	Succimer	-0.936042
ZINC00000189	DB04838	Cyclandelate	-0.672545
ZINC00057504	DB00870	Suprofen	-0.664418
ZINC03831540	DB01607	Ticarcillin	-0.167149
ZINC00000365	DB00473	Hexylcaine	-0.09493
ZINC38664632	DB00895	Benzylpenicilloyl Polylysine	-0.090992
ZINC00002191	DB00500	Tolmetin	-0.070081
ZINC14768469	DB00430	Cefpiramide	-0.026021
ZINC05179119	DB00634	Sulfacetamide	0.203695
ZINC08101126	DB00536	Guanidine	0.214783
ZINC03953037	DB01194	Brinzolamide	0.291804
ZINC19419017	DB00789	Gadopentetate dimeglumine	0.372962
ZINC03831157	DB04570	Latamoxef	0.483543
ZINC19340795	DB00680	Moricizine	0.86179
ZINC00001688	DB00244	Mesalazine	1.18507
ZINC03871094	DB00703	Methazolamide	1.20058
ZINC01532517	DB00119	Pyruvic acid	1.29207
ZINC03861770	DB00148	Creatine	1.49332
ZINC00895099	DB00161	L-Valine	1.96421
ZINC00004949	DB00996	Gabapentin	2.0685
ZINC00057001	DB01197	Captopril	2.32708
ZINC00895032	DB00128	L-Aspartic Acid	2.46476
ZINC21992285	DB01143	Amifostine	2.49522
ZINC08214651	DB00556	Perflutren	2.57099
ZINC22016976	DB00597	Gadoteridol	2.99845
ZINC05224164	DB00258	Calcium Acetate	3.21601
ZINC01532530	DB00129	L-Ornithine	3.32913
ZINC18456284	DB00650	Leucovorin	3.35525
ZINC01482113	DB00142	L-Glutamic Acid	4.54926
ZINC18456286	DB00650	Leucovorin	5.78639
ZINC03872520	DB00609	Ethionamide	6.16674
ZINC03831477	DB00566	Succimer	6.21326
ZINC08035131	DB00720	Clodronate	6.30753
ZINC03830507	DB00456	Cefalotin	6.50274
ZINC13897226	DB00177	Valsartan	8.03857
ZINC03871880	DB00578	Carbenicillin	8.37903
ZINC12503091	DB00355	Aztreonam	8.633
ZINC03786192	DB00605	Sulindac	9.09059
ZINC01532734	DB00127	Spermine	11.7062
ZINC19364242	DB00974	Edetic Acid	11.7088
ZINC00895199	DB01235	Levodopa	11.8537
ZINC03813042	DB00819	Acetazolamide	12.6884
ZINC29319828	DB00876	Eprosartan	12.8932
ZINC19702112	DB00630	Alendronate	15.6066
ZINC01530283	DB06775	Carglumic Acid	21.5575
ZINC00895030	DB00139	Succinic acid	21.728
ZINC03079340	DB00583	L-Carnitine	40.3405
ZINC20330769	DB00884	Risedronate	152392176
ZINC19632883	DB01077	Etidronic acid	804496256
ZINC21981378	DB00300	Tenofovir	2060131584
ZINC19594585	DB00828	Fosfomycin	6444792320
ZINC22066984	DB01133	Tiludronate	7099449856
