# Supplementary material for: In silico identification of novel kinase inhibitors targeting wild-type and T315I mutant ABL1 from FDA-approved drugs
Source: Royal Society of Chemistry journal article supplement (doi:10.1039/c3mb70577c), 2014-02-18
Supplement: c3mb70577c7.xlsx [file c3mb70577c7.xlsx]

## Sheet: Abbreviation
ELE	- non-bonded electrostatic energy + 1,4-electrostatic energy
VDW	- non-bonded van der Waals energy + 1,4-van der Waals energy
INT	- bond, angle, dihedral energies
GAS	- ELE + VDW + INT
PBSUR	- hydrophobic contrib. to solv. free energy for PB calculations
PBCAL	- reaction field energy calculated by PB
PBSOL	- PBSUR + PBCAL
PBELE	- PBCAL + ELE
PBTOT	- PBSOL + GAS
GBSUR	- hydrophobic contrib. to solv. free energy for GB calculations
GB	- reaction field energy calculated by GB
GBSOL	- GBSUR + GB
GBELE	- GB + ELE
GBTOT	- GBSOL + GAS
TSTRA	- translational entropy (as calculated by nmode) times temperature
TSROT	- rotational entropy (as calculated by nmode) times temperature
TSVIB	- vibrational entropy (as calculated by nmode) times temperature
*** Prefixes in front of abbreviations for energy decomposition ***
"T" - energy part due to Total residue
"S" - energy part due to Sidechain atoms
"B" - energy part due to Backbone atoms

## Sheet: wt_bethanechol
=>>	COMPLEX
	Number	Residue	Residue Name	Residue ID	SINT		BINT		TINT		SVDW		BVDW		TVDW		SELE		BELE		TELE		SGAS		BGAS		TGAS		SGB		BGB		TGB		SGBSUR		BGBSUR		TGBSUR		SGBSOL		BGBSOL		TGBSOL		SGBTOT		BGBTOT
	0	1	TRP	235	12.38	2.27	3.77	0.86	16.15	2.69	0.69	0.84	-1.03	0.45	-0.34	1.01	-19.44	5.86	-27.48	1.36	-46.92	6.55	-6.37	6.51	-24.74	1.59	-31.1	7.27	-41.03	5.71	-3.87	0.9	-44.9	6.21	1.79	0.14	0	0.01	1.79	0.14	-39.24	5.7	-3.86	0.9	-43.11	6.2	-45.61	2.65	-28.6
	1	2	GLU	236	6.03	1.65	9.21	1.34	15.24	2.36	-1.33	0.59	-0.39	0.69	-1.72	0.89	-2.97	4.79	-3.49	1.33	-6.46	5.38	1.73	5.21	5.33	1.91	7.06	5.99	-59.44	4.78	-3.26	1.23	-62.7	5.23	0.68	0.08	0.19	0.03	0.87	0.09	-58.76	4.74	-3.07	1.22	-61.83	5.2	-57.03	1.61	2.26
	2	3	MET	237	6.88	1.95	9.7	1.09	16.59	2.38	-6.22	0.82	-0.54	0.87	-6.76	1.21	-0.39	0.48	-8.48	1.4	-8.88	1.53	0.27	2.14	0.68	1.97	0.95	3.18	0.33	0.37	-3.19	1.04	-2.86	1.09	0.05	0.03	0.08	0.02	0.13	0.04	0.38	0.37	-3.12	1.04	-2.73	1.09	0.66	2.15	-2.44
	3	4	GLU	238	6.6	1.99	9.71	1.13	16.32	2.41	-0.36	1.07	-0.86	0.89	-1.22	1.5	-21.38	7.9	1.54	1.25	-19.84	8.14	-15.13	7.67	10.39	1.53	-4.74	8.21	-44.22	6.62	-4.07	0.84	-48.29	6.96	0.6	0.07	0.03	0.01	0.63	0.07	-43.62	6.58	-4.04	0.84	-47.66	6.93	-58.75	1.99	6.35
	4	5	ARG	239	13.45	3	10.91	1.41	24.36	3.45	-3.59	1.31	-1.67	0.68	-5.26	1.45	-194.8	7.27	-4.81	0.96	-199.61	7.31	-184.94	7.5	4.43	1.49	-180.51	7.78	6.91	5.82	-4.7	0.75	2.2	5.76	0.5	0.11	0.08	0.02	0.58	0.11	7.4	5.77	-4.62	0.75	2.78	5.72	-177.54	3.5	-0.2
	5	6	THR	240	6.37	1.28	10.01	1.41	16.38	1.94	-0.26	0.46	0.98	0.97	0.72	1.25	-20.58	0.99	-22.57	3.42	-43.14	3.38	-14.46	1.54	-11.58	3.09	-26.04	3.42	-3.99	0.66	-0.16	2.6	-4.15	2.44	0.7	0.05	0.1	0.04	0.8	0.07	-3.29	0.67	-0.06	2.57	-3.36	2.39	-17.76	1.47	-11.64
	6	7	ASP	241	4.98	1.7	10.2	1.53	15.18	2.42	-2.24	1.01	-0.77	0.94	-3.02	1.44	-35.95	11.68	-9.85	2.01	-45.8	11.83	-33.22	11.13	-0.42	2.66	-33.63	11.42	-26.22	10.47	-2.16	1.42	-28.38	10.64	0.2	0.08	0.02	0.02	0.22	0.08	-26.02	10.4	-2.14	1.4	-28.16	10.57	-59.24	2.1	-2.56
	7	8	ILE	242	9.97	1.88	10.23	1.32	20.2	2.58	-3.8	1.04	-0.55	0.8	-4.35	1.49	-3.21	0.37	-6.49	1.35	-9.7	1.21	2.96	1.97	3.19	1.99	6.15	3.12	1.26	0.33	-4.29	1.16	-3.02	1	0.01	0.01	0.05	0.02	0.06	0.02	1.27	0.32	-4.24	1.17	-2.97	1.01	4.23	1.95	-1.05
	8	9	THR	243	6.57	1.42	10.6	1.4	17.17	2.11	-1.06	0.68	-0.71	0.97	-1.76	1.24	-21.68	2.13	-12.78	1.37	-34.45	2.57	-16.17	2.44	-2.88	1.83	-19.05	2.9	-2.01	1.65	-2.15	0.7	-4.17	1.68	0.41	0.07	0.03	0.01	0.44	0.07	-1.6	1.62	-2.12	0.7	-3.72	1.65	-17.77	1.49	-5
	9	10	MET	244	7.56	1.87	9.9	1.1	17.46	2.3	-4.82	0.66	-0.75	0.62	-5.57	0.98	1.04	0.53	1.57	0.75	2.62	0.82	3.79	1.82	10.72	1.32	14.5	2.32	-1.18	0.38	-4.48	0.76	-5.66	0.69	0.26	0.06	0.19	0.03	0.45	0.06	-0.92	0.37	-4.29	0.75	-5.2	0.69	2.87	1.81	6.43
	10	11	LYS	245	10.96	2.27	11.84	1.23	22.8	2.71	-1.18	1.07	-0.09	0.71	-1.28	1.29	-11.06	10.41	-4.12	1.01	-15.17	10.09	-1.28	10.61	7.62	1.31	6.35	10.16	-15.64	9.72	-4.42	0.58	-20.06	9.47	0.94	0.17	0.27	0.03	1.21	0.17	-14.7	9.67	-4.16	0.57	-18.85	9.42	-15.97	2.58	3.47
	11	12	HIS	246	24.91	1.54	9.76	1.21	34.66	1.94	-2.45	0.69	-0.97	0.75	-3.42	0.99	-11.73	2.29	-8.36	1.09	-20.09	3.04	10.73	2.86	0.43	1.52	11.16	3.58	-4.9	1.99	-2.27	0.7	-7.17	2.32	0.76	0.07	0.05	0.02	0.81	0.07	-4.14	1.96	-2.22	0.71	-6.36	2.3	6.59	1.67	-1.79
	12	13	LYS	247	11.34	2.33	10.47	1.1	21.81	2.63	-2.87	0.91	-1.79	0.95	-4.66	1.29	-25.7	13.37	-3.7	1.62	-29.41	13.44	-17.23	13.73	4.97	1.93	-12.26	13.89	-2.58	12.04	-3.37	1.16	-5.94	12.02	0.52	0.1	0.01	0.02	0.53	0.1	-2.05	11.96	-3.36	1.15	-5.41	11.94	-19.28	3.09	1.61
	13	14	LEU	248	8.75	1.82	9.41	1.15	18.16	2.31	-3.21	0.95	-1.89	0.92	-5.09	1.33	-25.98	0.4	-10.38	1.41	-36.37	1.45	-20.44	1.89	-2.85	1.91	-23.29	2.87	2.37	0.3	-1.92	0.67	0.45	0.65	0.13	0.04	0	0	0.13	0.04	2.5	0.3	-1.92	0.67	0.59	0.65	-17.93	1.9	-4.77
	14	15	GLY	249	0	0	8.67	1.35	8.67	1.35	0	0	-1.58	0.68	-1.58	0.68	0	0	-10.98	1.92	-10.98	1.92	0	0	-3.89	2	-3.89	2	0	0	-2.75	1.35	-2.75	1.35	0	0	0.28	0.04	0.28	0.04	0	0	-2.47	1.33	-2.47	1.33	0	0	-6.35
	15	16	GLY	250	0	0	8.5	1.51	8.5	1.51	0	0	-0.94	0.55	-0.94	0.55	0	0	-7.69	1.85	-7.69	1.85	0	0	-0.13	2.12	-0.13	2.12	0	0	-5.07	1.67	-5.07	1.67	0	0	0.45	0.08	0.45	0.08	0	0	-4.62	1.63	-4.62	1.63	0	0	-4.76
	16	17	GLY	251	0	0	9.69	1.71	9.69	1.71	0	0	-1.35	0.77	-1.35	0.77	0	0	-8.76	2.43	-8.76	2.43	0	0	-0.41	2.93	-0.41	2.93	0	0	-3.03	1.98	-3.03	1.98	0	0	0.22	0.05	0.22	0.05	0	0	-2.81	1.95	-2.81	1.95	0	0	-3.22
	17	18	GLN	252	14.04	1.99	10.19	1.57	24.23	2.72	-2.3	0.76	-0.54	0.62	-2.84	1.06	-66.16	1.83	-5.12	1.63	-71.28	2.22	-54.42	2.61	4.53	2.05	-49.89	3.39	-8.23	1.51	-4.8	1.03	-13.03	1.72	0.63	0.07	0.13	0.04	0.76	0.09	-7.59	1.49	-4.67	1.01	-12.26	1.67	-62.01	1.9	-0.14
	18	19	TYR	253	8.1	2.05	8.64	1.24	16.74	2.51	-4.09	0.81	-0.71	0.69	-4.8	1.18	-17.78	0.82	-3.86	1.05	-21.63	1.27	-13.76	2.32	4.07	1.61	-9.69	2.86	-2.35	0.64	-4.3	0.67	-6.64	0.86	0.1	0.04	0.03	0.02	0.13	0.04	-2.24	0.62	-4.26	0.67	-6.51	0.84	-16.01	2.25	-0.19
	19	20	GLY	254	0	0	8.73	1.53	8.73	1.53	0	0	-1.69	0.74	-1.69	0.74	0	0	-10.82	1.54	-10.82	1.54	0	0	-3.78	2.02	-3.78	2.02	0	0	-2.14	1.11	-2.14	1.11	0	0	0.14	0.04	0.14	0.04	0	0	-2.01	1.09	-2.01	1.09	0	0	-5.79
	20	21	GLU	255	6.49	1.88	10.87	1.46	17.36	2.32	-0.53	0.82	-1	0.87	-1.53	1.42	-21.35	9.94	-6.56	2.26	-27.92	9.86	-15.39	10.34	3.3	2.47	-12.09	10.04	-41.62	9.52	-4.4	1.06	-46.02	9.57	0.66	0.11	0.05	0.02	0.71	0.12	-40.96	9.47	-4.35	1.04	-45.31	9.51	-56.35	1.77	-1.05
	21	22	VAL	256	5.99	1.56	10.27	1.31	16.26	2.16	-2.8	0.79	-1.24	0.97	-4.04	1.32	-17.76	0.52	-10.84	1.12	-28.6	1.07	-14.56	1.84	-1.82	1.67	-16.38	2.44	2.58	0.42	-3.66	0.73	-1.08	0.56	0.05	0.03	0	0	0.05	0.03	2.63	0.43	-3.65	0.73	-1.03	0.55	-11.94	1.77	-5.47
	22	23	TYR	257	8.25	1.87	10.71	1.38	18.96	2.34	-3.76	0.74	-2.56	0.93	-6.31	1.15	-16.09	1.12	-12	1.02	-28.09	1.68	-11.6	2.31	-3.85	1.37	-15.45	2.55	-5.11	0.91	-1.51	0.43	-6.62	1.02	0.41	0.05	0	0	0.41	0.05	-4.7	0.91	-1.51	0.43	-6.21	1.02	-16.29	2.1	-5.36
	23	24	GLU	258	6.14	1.66	9.52	1.34	15.66	2.44	-4.1	0.75	-1.92	0.91	-6.02	1.3	4.55	8.27	-10.14	1.04	-5.59	8.21	6.59	8.44	-2.54	1.45	4.04	8.71	-64.47	8.4	-1.38	0.48	-65.84	8.39	0.26	0.08	0	0	0.26	0.08	-64.2	8.33	-1.38	0.48	-65.58	8.32	-57.62	1.71	-3.92
	24	25	GLY	259	0	0	8.3	1.44	8.3	1.44	0	0	-3.16	0.86	-3.16	0.86	0	0	-6.89	1.13	-6.89	1.13	0	0	-1.76	1.66	-1.76	1.66	0	0	-3.73	0.89	-3.73	0.89	0	0	0.02	0.01	0.02	0.01	0	0	-3.71	0.88	-3.71	0.88	0	0	-5.47
	25	26	VAL	260	6.42	1.91	10	1.31	16.43	2.37	-1.95	0.73	-1.53	0.97	-3.48	1.44	-16.05	0.69	-12.84	1.42	-28.89	1.42	-11.57	1.93	-4.37	1.79	-15.94	2.6	1.13	0.54	-1.19	0.86	-0.07	0.76	0.3	0.07	0	0	0.3	0.07	1.43	0.59	-1.19	0.86	0.23	0.77	-10.15	1.94	-5.56
	26	27	TRP	261	11.46	2.16	11.38	1.18	22.84	2.53	-6.38	1	-3.1	0.84	-9.48	1.39	4.68	2.19	-5.03	1.4	-0.35	2.52	9.77	2.75	3.25	1.75	13.02	3.24	-0.71	1.12	-1.07	0.57	-1.79	1.37	0.28	0.08	0	0	0.28	0.08	-0.43	1.12	-1.07	0.57	-1.5	1.35	9.34	2.35	2.18
	27	28	LYS	262	11.03	2.37	12.58	1.56	23.61	2.78	-1.96	1.01	-1.12	0.67	-3.08	1.32	-1.89	7.46	1.09	1.59	-0.8	8.26	7.18	7.71	12.55	2.08	19.73	8.83	-24.82	7.31	-4.57	0.97	-29.38	7.61	0.77	0.11	0.13	0.03	0.91	0.11	-24.04	7.23	-4.43	0.95	-28.47	7.54	-16.86	2.64	8.12
	28	29	LYS	263	10.76	2.38	11.2	1.4	21.96	2.88	-1.32	1.21	-0.33	0.69	-1.66	1.53	-6.18	10.33	-7.71	1.44	-13.89	9.76	3.26	9.69	3.15	1.96	6.41	9.06	-21.83	9.19	-5.47	1.05	-27.3	8.58	0.84	0.07	0.25	0.03	1.08	0.07	-20.99	9.19	-5.22	1.04	-26.21	8.59	-17.74	2.6	-2.07
	29	30	TYR	264	8.67	2.22	9.41	1.32	18.08	2.9	0.46	0.86	0.29	0.69	0.75	1.11	-17.31	1	-8.3	0.85	-25.61	1.45	-8.18	2.8	1.4	1.43	-6.78	3.54	-5.36	0.92	-6.2	0.63	-11.57	1.25	0.93	0.09	0.19	0.02	1.13	0.1	-4.43	0.85	-6.01	0.62	-10.44	1.17	-12.61	2.49	-4.61
	30	31	SER	265	3.33	1	10.57	1.4	13.9	1.76	-0.14	0.43	-0.15	0.64	-0.29	0.87	-2.31	1.13	-4.11	1.46	-6.43	2.01	0.88	1.64	6.3	1.9	7.18	2.62	-3.29	1.01	-7.03	1.03	-10.32	1.44	0.55	0.03	0.14	0.03	0.68	0.04	-2.74	1.01	-6.9	1.01	-9.64	1.43	-1.87	1.12	-0.59
	31	32	LEU	266	9.08	2.22	10.51	1.08	19.59	2.57	-1.02	0.74	-0.97	0.82	-1.99	1.08	-25.25	0.39	-7.74	0.92	-32.98	1.01	-17.18	2.29	1.8	1.24	-15.38	2.61	1.27	0.24	-1.58	0.52	-0.31	0.52	0.55	0.06	0.02	0.01	0.57	0.06	1.82	0.25	-1.56	0.52	0.26	0.52	-15.36	2.29	0.24
	32	33	THR	267	6.71	1.54	10.12	1.14	16.84	2.1	-1.46	0.58	-1.38	0.74	-2.84	1.01	-22.07	1.51	-8.62	0.89	-30.68	2.1	-16.81	2.05	0.13	1.46	-16.69	2.64	-1.62	1.11	-4.74	0.68	-6.36	1.57	0.45	0.07	0.04	0.02	0.49	0.07	-1.17	1.1	-4.7	0.68	-5.88	1.57	-17.99	1.71	-4.58
	33	34	VAL	268	5.95	1.58	9.91	1.28	15.86	2.17	-3.74	0.77	-1.72	0.88	-5.46	1.35	-18.37	0.47	-11.3	1.12	-29.67	1.28	-16.16	1.78	-3.11	1.51	-19.27	2.54	2.82	0.34	-3.78	0.58	-0.96	0.5	0	0	0	0	0	0	2.82	0.34	-3.78	0.58	-0.96	0.5	-13.34	1.72	-6.89
	34	35	ALA	269	2.53	0.76	9.85	1.34	12.38	1.66	-2.06	0.27	-2.46	0.92	-4.52	0.96	2.21	0.14	-7.14	1.14	-4.94	1.14	2.67	0.84	0.25	1.67	2.92	2.01	-0.1	0.08	-0.61	0.39	-0.71	0.4	0.02	0.01	0	0	0.02	0.01	-0.08	0.08	-0.61	0.39	-0.7	0.4	2.59	0.83	-0.36
	35	36	VAL	270	6.09	1.7	10.81	1.39	16.9	2.35	-3.4	0.64	-1.1	1	-4.49	1.33	-17.79	0.47	-5.25	1.16	-23.04	1.16	-15.09	1.8	4.47	1.49	-10.63	2.47	2.12	0.33	-3.42	0.51	-1.3	0.39	0	0	0	0	0	0	2.12	0.33	-3.42	0.51	-1.3	0.39	-12.97	1.7	1.05
	36	37	LYS	271	10.61	2.32	10.46	1.08	21.07	2.6	-3.26	0.86	-2.62	0.73	-5.88	1.12	-34.71	9.5	-8.81	1.12	-43.52	9.73	-27.36	9.92	-0.97	1.56	-28.33	10.39	7.07	7.74	-1.07	0.46	6	7.94	0.31	0.06	0	0	0.31	0.06	7.38	7.75	-1.07	0.46	6.32	7.95	-19.98	3.41	-2.03
	37	38	THR	272	6.26	1.48	10.02	1.28	16.28	2.1	-2.29	0.75	-1.27	0.71	-3.55	1.12	-22.84	1.73	-12.43	0.97	-35.26	2.23	-18.86	2.33	-3.68	1.49	-22.54	2.83	-1.3	1.08	-3.92	0.7	-5.22	1.43	0.11	0.04	0.05	0.03	0.16	0.06	-1.18	1.05	-3.87	0.7	-5.05	1.39	-20.04	1.81	-7.55
	38	39	LEU	273	8.88	2.09	10.25	1.28	19.13	2.45	-2.11	0.96	-1.64	0.67	-3.75	1.21	-25.57	0.45	2.81	1.22	-22.76	1.2	-18.8	2.2	11.42	1.58	-7.38	2.68	1.88	0.32	-3.71	0.75	-1.83	0.78	0.25	0.04	0.03	0.01	0.27	0.05	2.13	0.3	-3.69	0.75	-1.56	0.77	-16.67	2.23	7.73
	39	40	LYS	274	11.25	2.39	17.63	1.56	28.88	3.08	-0.64	0.78	-1.79	0.76	-2.43	1.23	-5.11	8.38	-9.2	1	-14.31	8.45	5.49	7.94	6.64	1.37	12.13	7.97	-22.03	7.8	-3.88	0.88	-25.91	7.73	1.04	0.11	0.08	0.02	1.12	0.11	-20.99	7.72	-3.8	0.87	-24.79	7.66	-15.5	2.64	2.84
	40	41	ASP	276	3.93	1.2	14.07	1.4	18	1.88	-3.09	0.58	-1.04	0.83	-4.13	1.14	10.81	3.66	-7.74	2.22	3.07	5.41	11.65	3.79	5.29	2.54	16.94	5.69	-72.53	3.93	-8.4	2.13	-80.94	5.56	0.27	0.05	0.13	0.03	0.4	0.05	-72.27	3.92	-8.27	2.12	-80.54	5.54	-60.62	1.37	-2.98
	41	42	THR	277	6.29	1.37	11	1.51	17.28	2.17	-0.35	0.46	0.7	0.68	0.35	0.94	-21.86	1.12	-7.24	1.53	-29.11	1.69	-15.93	1.76	4.45	1.92	-11.48	2.44	-2.62	1	-7.62	1.17	-10.24	1.28	0.6	0.05	0.26	0.03	0.85	0.06	-2.02	1.01	-7.36	1.17	-9.39	1.29	-17.95	1.52	-2.91
	42	43	MET	278	6.83	1.6	11.14	1.48	17.97	2.42	-0.58	0.57	0.22	0.55	-0.35	0.92	-1.15	1.05	-1.7	1.34	-2.85	1.92	5.11	1.99	9.66	2.16	14.77	3.15	0.03	1.02	-9.37	1.12	-9.34	1.72	1.09	0.06	0.23	0.04	1.32	0.06	1.12	1.01	-9.14	1.12	-8.02	1.71	6.23	1.7	0.52
	43	44	GLU	279	5.83	1.69	9.7	1.17	15.53	2.35	-1.36	0.83	-0.41	0.66	-1.78	1.07	24.55	6	-1.72	2.23	22.83	7.47	29.02	6.56	7.56	2.55	36.58	8.18	-86.46	6.33	-6.49	1.9	-92.95	7.62	0.61	0.12	0.08	0.02	0.69	0.13	-85.85	6.29	-6.41	1.89	-92.26	7.56	-56.83	1.81	1.16
	44	45	VAL	280	6.41	1.57	10.78	1.4	17.2	2.24	-1.51	0.75	0.14	1.06	-1.38	1.42	-19.61	0.74	-13.36	2.13	-32.97	2.63	-14.71	1.9	-2.44	2.22	-17.15	3.19	4.84	0.6	-2.87	1.19	1.97	1.62	0.3	0.05	0.01	0.01	0.31	0.05	5.14	0.59	-2.86	1.19	2.28	1.61	-9.57	1.75	-5.3
	45	46	GLU	281	6.21	1.56	11.28	1.21	17.49	1.99	-1	0.72	-0.7	1.1	-1.69	1.32	19.22	9.77	-12.62	1.59	6.6	9.7	24.44	9.65	-2.04	1.93	22.4	9.82	-82.98	9.44	-2.44	1	-85.42	9.47	0.73	0.09	0.01	0.02	0.74	0.1	-82.26	9.4	-2.42	1	-84.68	9.43	-57.82	1.76	-4.46
	46	47	GLU	282	6.37	2	10.32	1.17	16.69	2.36	-0.38	1.07	-1.02	0.8	-1.4	1.32	-9.16	13.06	-4.41	1.49	-13.57	13.51	-3.17	12.86	4.9	1.59	1.73	13.21	-55.19	12.03	-6.35	1.2	-61.54	12.42	0.63	0.13	0.04	0.02	0.67	0.13	-54.56	11.94	-6.31	1.19	-60.87	12.32	-57.73	2.18	-1.41
	47	48	PHE	283	8.23	1.88	10.93	1.22	19.16	2.28	-4.67	0.75	-2.16	0.75	-6.83	0.99	1.64	0.33	-7.64	1.01	-6	1.09	5.2	2.32	1.14	1.45	6.34	2.82	-0.74	0.27	-0.64	0.62	-1.38	0.73	0.04	0.02	0.01	0.01	0.05	0.02	-0.7	0.27	-0.63	0.62	-1.33	0.73	4.5	2.31	0.51
	48	49	LEU	284	9.09	2.02	11.29	1.3	20.38	2.41	-1.07	0.99	-1.41	0.76	-2.48	1.3	-25.57	0.44	-1.04	1.27	-26.61	1.25	-17.55	2.24	8.84	1.78	-8.71	2.76	2.02	0.32	-2.16	1	-0.14	0.94	0.52	0.06	0.05	0.02	0.57	0.06	2.54	0.31	-2.11	0.99	0.43	0.93	-15.01	2.25	6.72
	49	50	LYS	285	10.89	2.1	11.46	1.47	22.36	2.79	-1.32	0.83	-1.16	0.85	-2.47	1.23	-32.82	11.28	-13.39	1.23	-46.21	11.23	-23.24	11.42	-3.08	1.64	-26.32	11.56	4.64	10.02	-0.83	0.8	3.82	9.85	0.96	0.09	0.04	0.02	1	0.09	5.61	9.96	-0.79	0.79	4.82	9.79	-17.63	2.76	-3.87
	50	51	GLU	286	6.61	1.72	11.43	1.3	18.04	2.28	-2.34	0.98	-1.29	0.97	-3.64	1.45	-16.99	12.77	-15.1	1.58	-32.09	13.82	-12.73	13.03	-4.96	1.91	-17.69	13.98	-41.41	13.1	-2.89	1.08	-44.3	13.96	0.22	0.07	0.03	0.01	0.25	0.07	-41.19	13.05	-2.86	1.08	-44.05	13.91	-53.91	1.77	-7.82
	51	52	ALA	287	2.67	0.78	10.97	1.16	13.64	1.49	-1.5	0.33	-2.48	0.77	-3.98	0.85	2.13	0.14	-9.99	0.94	-7.86	0.94	3.3	0.91	-1.49	1.52	1.8	1.86	-0.18	0.07	0.6	0.67	0.43	0.7	0.05	0.02	0.02	0.01	0.07	0.02	-0.13	0.07	0.63	0.67	0.5	0.69	3.17	0.9	-0.87
	52	53	ALA	288	2.77	0.87	11.05	1.15	13.82	1.58	-0.91	0.2	-1.75	0.73	-2.66	0.79	2.07	0.15	-6.01	1.29	-3.94	1.31	3.93	0.93	3.29	1.62	7.22	1.91	-0.08	0.08	-0.76	1.03	-0.84	1.04	0.33	0.04	0.05	0.03	0.39	0.05	0.25	0.09	-0.7	1.03	-0.45	1.03	4.18	0.91	2.59
	53	54	VAL	289	6.29	1.8	11.13	1.34	17.43	2.31	-1.02	0.69	-0.49	0.9	-1.52	1.23	-18.03	0.73	-11	1.18	-29.03	1.11	-12.76	1.85	-0.36	1.77	-13.12	2.6	2.9	0.62	-2.85	0.81	0.06	0.62	0.4	0.06	0	0.01	0.41	0.06	3.3	0.61	-2.84	0.81	0.46	0.61	-9.45	1.83	-3.21
	54	55	MET	290	8.72	1.89	11.3	1.38	20.02	2.4	-5.3	0.78	-1.85	0.84	-7.15	1.22	-1.3	0.73	-1.55	1.09	-2.85	1.3	2.11	1.83	7.91	1.84	10.02	2.69	0.93	0.64	-3.73	0.96	-2.8	1.16	0.06	0.03	0.01	0.01	0.07	0.04	0.99	0.63	-3.72	0.96	-2.73	1.15	3.1	1.89	4.19
	55	56	LYS	291	11.1	2.15	10.65	1.37	21.74	2.79	-1.5	0.75	-1.31	0.66	-2.81	1.14	7.26	10.29	-10.62	1.41	-3.36	9.99	16.85	10.61	-1.28	1.66	15.58	10.5	-33.55	9.71	-1.7	1.29	-35.25	9.29	0.89	0.08	0.09	0.05	0.98	0.1	-32.66	9.69	-1.61	1.26	-34.26	9.29	-15.8	2.55	-2.88
	56	57	GLU	292	6.7	1.71	10.85	1.45	17.56	2.22	-1.9	0.85	-0.37	1.04	-2.28	1.38	-23.02	8.9	-16.38	1.68	-39.41	9.5	-18.22	8.99	-5.9	2.2	-24.13	9.64	-40.37	8.27	-1.52	0.91	-41.89	8.59	0.47	0.07	0.02	0.01	0.5	0.07	-39.89	8.22	-1.5	0.91	-41.39	8.53	-58.12	1.77	-7.4
	57	58	ILE	293	9.48	1.81	11.32	1.47	20.8	2.52	-2.73	1.03	-0.99	0.69	-3.72	1.34	-5.25	0.43	1.38	1.02	-3.87	0.96	1.5	2.08	11.71	1.56	13.21	2.62	2.85	0.4	-6.16	0.63	-3.31	0.52	0.11	0.04	0.01	0.01	0.12	0.04	2.97	0.41	-6.15	0.63	-3.19	0.53	4.47	2.04	5.56
	58	59	LYS	294	11.21	1.94	11.63	1.34	22.84	2.46	-0.37	0.85	-0.79	0.69	-1.16	1.11	6.28	5.12	-3.62	1.21	2.66	5.23	17.11	5.37	7.23	1.54	24.34	5.5	-33.14	4.98	-3.27	0.9	-36.41	5.08	1.08	0.17	0.09	0.04	1.18	0.16	-32.06	4.99	-3.18	0.89	-35.24	5.09	-14.95	2.11	4.05
	59	60	HIS	295	24.58	1.68	11.37	1.22	35.95	2.18	-6.85	0.87	-0.45	0.68	-7.3	1.01	-14.98	1.8	-1.66	1.07	-16.63	2.33	2.76	2.28	9.26	1.63	12.02	2.81	-0.13	1.45	-3.72	0.71	-3.85	1.76	0.2	0.04	0.08	0.02	0.28	0.04	0.07	1.42	-3.64	0.71	-3.57	1.74	2.84	1.97	5.62
	60	61	PRO	296	12.14	1.4	13.99	1.36	26.13	2.23	-1.06	0.48	-1.35	0.54	-2.41	0.69	-7.01	0.94	-2.03	1.24	-9.04	0.97	4.08	1.88	10.61	1.7	14.69	2.41	6.36	0.91	-8.57	1.04	-2.2	0.77	0.68	0.03	0.1	0.02	0.78	0.03	7.04	0.91	-8.46	1.04	-1.42	0.76	11.12	1.54	2.15
	61	62	ASN	297	11.6	1.9	10.03	1.48	21.63	2.53	-4.42	0.76	-1.61	0.93	-6.03	1.24	-81.04	1.32	-8.07	0.85	-89.11	1.71	-73.86	1.85	0.35	1.33	-73.51	2.4	-4.19	0.78	-0.4	0.28	-4.6	0.83	0.11	0.02	0	0	0.11	0.02	-4.09	0.78	-0.4	0.28	-4.49	0.83	-77.95	1.65	-0.05
	62	63	LEU	298	8.62	2.18	9.96	1.29	18.58	2.76	-4.31	0.82	-1.88	0.83	-6.19	1.22	-26.87	0.44	-1.89	2.01	-28.76	1.96	-22.56	2.4	6.2	2.34	-16.36	3.46	3.17	0.28	-5.18	0.97	-2.01	0.87	0.02	0.01	0	0	0.03	0.01	3.2	0.27	-5.17	0.97	-1.98	0.87	-19.36	2.37	1.02
	63	64	VAL	299	6.29	1.57	10.38	1.14	16.67	2.05	-2.65	0.85	-1.6	0.6	-4.25	1.13	-18.88	0.51	-7.65	1.21	-26.53	1.15	-15.24	1.9	1.13	1.5	-14.11	2.39	3.82	0.45	-6.71	1	-2.89	0.8	0.01	0.01	0	0	0.02	0.01	3.83	0.45	-6.7	1	-2.87	0.8	-11.41	1.87	-5.57
	64	65	GLN	300	14.32	2.28	10.75	1.2	25.08	2.9	-2.48	0.66	-2.32	0.75	-4.81	1.1	-65.12	2.13	-6.73	1.15	-71.85	2.33	-53.28	2.52	1.7	1.45	-51.58	3.13	-7.93	1.69	-2.48	0.55	-10.41	1.77	0.58	0.09	0.01	0.01	0.59	0.1	-7.35	1.67	-2.47	0.55	-9.82	1.76	-60.63	2.07	-0.77
	65	66	LEU	301	8.57	1.89	10.98	1.3	19.55	2.36	-3.19	0.99	-1.8	0.85	-4.99	1.32	-24.11	0.75	-2.78	1.94	-26.89	1.75	-18.73	2.36	6.4	2.18	-12.33	3.22	0.33	0.57	-2.69	1.27	-2.36	1.05	0.07	0.03	0.07	0.03	0.14	0.05	0.41	0.58	-2.62	1.25	-2.21	1.03	-18.33	2.22	3.79
	66	67	LEU	302	9.74	1.97	11.25	1.27	20.99	2.57	-3.25	0.87	-1.05	0.79	-4.3	1.25	-24.65	0.38	-6.08	1.37	-30.73	1.3	-18.16	2	4.12	2.01	-14.04	3.1	1.17	0.29	-3.13	1.13	-1.96	0.98	0.15	0.05	0.08	0.03	0.24	0.06	1.33	0.3	-3.05	1.12	-1.72	0.98	-16.84	2.02	1.08
	67	68	GLY	303	0	0	8.04	1.23	8.04	1.23	0	0	-3.34	0.77	-3.34	0.77	0	0	-9.12	0.92	-9.12	0.92	0	0	-4.42	1.33	-4.42	1.33	0	0	-2.11	0.5	-2.11	0.5	0	0	0	0	0	0	0	0	-2.11	0.5	-2.11	0.5	0	0	-6.53
	68	69	VAL	304	6.38	1.65	9.76	1.39	16.14	2.21	-2.39	0.7	-2.04	0.87	-4.43	1.29	-16.48	0.59	-12.16	1.18	-28.65	1.07	-12.49	1.76	-4.44	1.64	-16.94	2.11	1.23	0.48	-2.64	0.86	-1.41	0.6	0.1	0.03	0	0	0.1	0.03	1.34	0.48	-2.64	0.86	-1.31	0.6	-11.16	1.65	-7.09
	69	70	CYS	305	3.17	1.06	11.13	1.13	14.3	1.73	-3.19	0.65	-2.15	0.83	-5.34	1	4.5	0.71	-8.49	1.14	-3.99	1.37	4.47	1.27	0.49	1.42	4.97	2.07	-0.44	0.33	-0.59	0.54	-1.03	0.64	0.02	0.01	0.01	0.01	0.03	0.01	-0.42	0.33	-0.58	0.54	-1	0.64	4.05	1.17	-0.08
	70	71	THR	306	6.29	1.71	10.9	1.45	17.18	2.52	-1.81	0.63	-0.4	0.69	-2.21	1.06	-22.26	1.16	-0.14	1.13	-22.41	1.66	-17.79	2.08	10.36	1.55	-7.43	2.56	-1.57	1.15	-7.08	0.52	-8.65	1.28	0.16	0.04	0.11	0.03	0.26	0.05	-1.42	1.14	-6.97	0.51	-8.39	1.27	-19.2	1.74	3.38
	71	72	ARG	307	13.46	2.9	11.34	1.46	24.8	3.31	-0.06	1.49	-0.1	0.64	-0.15	1.65	-220.77	9.71	-4.25	1.05	-225.02	9.91	-207.37	9.97	7	1.6	-200.37	10.29	25.85	7.58	-7.36	0.66	18.49	7.8	0.87	0.11	0.26	0.02	1.12	0.11	26.71	7.5	-7.1	0.66	19.61	7.73	-180.65	3.53	-0.1
	72	73	GLU	308	6.08	1.81	11.04	1.39	17.12	2.49	-1.33	0.99	-0.25	0.64	-1.58	1.3	-19.28	10.47	-2.38	1.7	-21.66	10.17	-14.53	10.5	8.41	2.01	-6.12	10.24	-45.17	10.19	-5.07	1.14	-50.24	9.93	0.46	0.07	0.02	0.01	0.48	0.07	-44.71	10.13	-5.05	1.14	-49.76	9.87	-59.24	2.35	3.36
	73	74	PRO	309	12.45	1.44	14.56	1.44	27.02	1.95	-1.56	0.49	-0.91	0.68	-2.47	0.83	-6.63	0.83	8.91	1.91	2.29	1.61	4.26	1.79	22.57	2.41	26.83	2.61	6.02	0.81	-9.79	1.78	-3.77	1.42	0.49	0.04	0.08	0.03	0.57	0.04	6.51	0.79	-9.71	1.76	-3.2	1.41	10.77	1.47	12.86
	74	75	PRO	310	12.2	1.35	12.99	1.15	25.19	1.8	-2.19	0.42	-2.11	1.01	-4.3	1.06	-2.75	0.98	-5.26	3.4	-8.01	3.17	7.26	1.89	5.62	3.24	12.88	3.39	2.09	0.9	-4.76	1.58	-2.67	1.34	0.4	0.05	0	0	0.4	0.05	2.49	0.91	-4.76	1.58	-2.27	1.37	9.75	1.52	0.86
	75	76	PHE	311	8.17	1.91	9.59	1.21	17.76	2.33	-4.32	0.79	-2.6	0.84	-6.92	1.26	0.38	0.35	-9.97	1.31	-9.59	1.43	4.23	2.05	-2.98	1.29	1.25	2.44	-0.02	0.26	-0.79	0.53	-0.82	0.61	0.14	0.03	0	0	0.14	0.03	0.12	0.26	-0.79	0.53	-0.68	0.61	4.35	2.06	-3.77
	76	77	TYR	312	8.91	2.24	10.17	1.23	19.08	2.66	-4	0.7	-2.89	0.67	-6.89	1.03	-16.44	0.95	-7.67	0.89	-24.1	1.33	-11.53	2.48	-0.39	1.25	-11.92	2.82	-4.14	0.61	-1.07	0.31	-5.21	0.68	0.21	0.04	0	0	0.21	0.04	-3.93	0.6	-1.07	0.31	-5	0.66	-15.46	2.42	-1.47
	77	78	ILE	313	9.5	1.96	10.9	1.3	20.41	2.55	-3.9	1.06	-2.13	0.76	-6.02	1.26	-3.23	0.39	-6.7	1.01	-9.92	0.98	2.38	2.05	2.08	1.59	4.46	2.59	1.32	0.35	-2.68	0.44	-1.36	0.41	0	0	0	0	0	0	1.33	0.35	-2.68	0.44	-1.36	0.41	3.71	1.98	-0.6
	78	79	ILE	314	10.28	2.24	10.74	1.2	21.02	2.58	-4.66	0.96	-1.81	1.03	-6.47	1.71	-3.45	0.36	-13.92	1.02	-17.37	1.01	2.17	2.01	-5	1.37	-2.82	2.27	1.5	0.31	-0.57	0.53	0.93	0.35	0	0	0	0	0	0	1.5	0.31	-0.57	0.53	0.93	0.35	3.68	1.97	-5.57
	79	80	THR	315	6.49	1.58	10.27	1.18	16.76	2.12	-3.31	0.87	-1.77	1.07	-5.08	1.54	-24.08	2.17	-16.75	0.98	-40.83	2.58	-20.9	2.42	-8.25	1.34	-29.15	2.73	1.15	0.95	-1.62	0.41	-0.47	1.06	0	0	0	0	0	0	1.15	0.95	-1.62	0.41	-0.47	1.06	-19.75	2.19	-9.87
	80	81	GLU	316	6.34	1.9	9.99	1.41	16.34	2.64	-2.05	1.33	-1.8	0.76	-3.86	1.66	-14.46	4.3	-0.8	0.95	-15.25	4.54	-10.17	3.93	7.4	1.63	-2.77	4.46	-47.31	3.99	-6.76	0.78	-54.07	4.32	0.2	0.03	0.02	0.02	0.21	0.03	-47.11	3.97	-6.74	0.78	-53.85	4.31	-57.28	1.93	0.66
	81	82	PHE	317	8.17	2.16	9.8	1.29	17.97	2.83	-1.75	0.56	-1.41	0.65	-3.16	0.91	0.37	0.46	-2.72	0.84	-2.35	0.94	6.8	2.28	5.66	1.34	12.46	2.86	-0.76	0.47	-4.92	0.57	-5.68	0.72	0.4	0.06	0.13	0.02	0.53	0.07	-0.37	0.44	-4.79	0.57	-5.15	0.71	6.43	2.3	0.88
	82	83	MET	318	7.46	2.15	11.12	1.41	18.58	2.47	-5.99	0.83	-1.82	0.59	-7.81	1.14	-2.67	0.49	-2.94	0.82	-5.62	0.97	-1.21	2.38	6.36	1.73	5.15	2.79	2.56	0.48	-5.86	0.65	-3.29	0.69	0.04	0.02	0.07	0.02	0.11	0.02	2.61	0.47	-5.79	0.64	-3.18	0.69	1.4	2.2	0.57
	83	84	THR	319	6.25	1.55	12.56	1.48	18.82	2.3	-0.58	0.9	-0.54	0.63	-1.11	1.17	-32.09	1.74	-7.63	0.8	-39.72	1.97	-26.41	2.18	4.4	1.38	-22.01	2.54	4.64	0.82	-8.99	0.63	-4.34	0.99	0.37	0.05	0.2	0.02	0.58	0.06	5.02	0.82	-8.78	0.63	-3.77	0.98	-21.39	1.78	-4.39
	84	85	TYR	320	8.87	2.07	8.89	1.38	17.76	2.61	-1.03	0.72	-0.78	0.65	-1.81	1.03	-17.4	0.87	-0.82	1.14	-18.22	1.35	-9.56	2.14	7.29	1.67	-2.27	2.64	-4.34	0.71	-8.74	0.93	-13.08	0.96	0.7	0.07	0.15	0.04	0.86	0.06	-3.63	0.71	-8.59	0.92	-12.22	0.96	-13.19	2.12	-1.29
	85	86	GLY	321	0	0	8.27	1.5	8.27	1.5	0	0	-2.01	0.57	-2.01	0.57	0	0	-7.68	1.28	-7.68	1.28	0	0	-1.41	1.9	-1.41	1.9	0	0	-3.59	0.99	-3.59	0.99	0	0	0.21	0.03	0.21	0.03	0	0	-3.38	1	-3.38	1	0	0	-4.8
	86	87	ASN	322	11.64	1.78	10.35	1.32	21.99	2.27	-4.37	0.54	-2.82	0.56	-7.18	0.89	-78.68	1.6	0.15	1.91	-78.53	2.61	-71.41	2.24	7.68	1.97	-63.72	3.02	-5.62	1.24	-6.61	1.35	-12.23	1.98	0.12	0.04	0.01	0.01	0.13	0.04	-5.49	1.23	-6.6	1.35	-12.1	1.97	-76.9	1.8	1.08
	87	88	LEU	323	8.53	1.75	11.68	1.22	20.22	2.04	-4.52	0.9	-2.35	0.84	-6.87	1.37	-28.02	0.36	-0.58	0.96	-28.6	1.05	-24.01	1.93	8.75	1.26	-15.26	2.09	4.26	0.2	-7.46	0.5	-3.19	0.47	0	0	0	0	0	0	4.26	0.2	-7.46	0.5	-3.19	0.47	-19.74	1.92	1.29
	88	89	LEU	324	8.67	1.92	11.67	1.44	20.33	2.45	-2.73	0.84	-3	0.75	-5.73	1.26	-27.82	0.44	-4.74	0.84	-32.57	0.97	-21.89	2.18	3.93	1.63	-17.96	2.69	3.86	0.28	-7.2	0.58	-3.34	0.58	0.21	0.04	0	0	0.21	0.04	4.07	0.29	-7.2	0.58	-3.13	0.58	-17.82	2.1	-3.27
	89	90	ASP	325	4.38	1.36	10.42	1.19	14.81	1.95	-2.11	0.37	-2.21	0.67	-4.32	0.81	54.46	8.21	5.17	2.64	59.63	9.53	56.74	8.25	13.38	2.76	70.12	9.65	-117.48	7.3	-19.64	2.37	-137.12	8.5	0.49	0.06	0.01	0.01	0.51	0.06	-116.98	7.34	-19.63	2.37	-136.61	8.53	-60.25	1.48	-6.25
	90	91	TYR	326	8.29	2.27	11.22	1.23	19.51	2.62	-4.25	0.72	-1.85	0.83	-6.1	1	-19.25	0.92	-4.09	1.56	-23.34	1.62	-15.21	2.65	5.27	2.08	-9.94	3.38	-1.35	0.84	-5.3	0.63	-6.64	0.9	0.15	0.06	0.02	0.01	0.17	0.06	-1.2	0.82	-5.27	0.63	-6.47	0.87	-16.41	2.48	0
	91	92	LEU	327	9.05	1.89	11.45	1.25	20.5	2.41	-4.68	0.95	-2.17	0.78	-6.85	1.28	-28.23	0.41	5.82	1.17	-22.42	1.12	-23.86	2.07	15.1	1.77	-8.76	2.8	4.9	0.24	-8	1.03	-3.1	0.97	0	0	0.02	0.01	0.02	0.01	4.9	0.24	-7.98	1.03	-3.07	0.97	-18.96	2.02	7.13
	92	93	ARG	328	12.65	2.66	10.39	1.15	23.04	3.1	-3.66	0.95	-0.46	0.65	-4.13	1.26	-228.58	4.63	-9.63	0.8	-238.21	4.66	-219.6	5.18	0.3	1.33	-219.3	5.51	42.79	4.49	-4.96	0.51	37.83	4.48	0.81	0.07	0.26	0.02	1.06	0.08	43.6	4.45	-4.7	0.51	38.9	4.44	-176	2.54	-4.4
	93	94	GLU	329	6.17	1.88	10.43	1.5	16.6	2.54	-1.05	0.67	0.41	0.7	-0.64	1.01	67.88	6.93	-5.01	0.99	62.87	7.16	73	7.07	5.82	1.68	78.82	7.46	-129.24	5.75	-13.48	0.67	-142.72	5.98	0.78	0.07	0.25	0.03	1.03	0.06	-128.46	5.8	-13.23	0.66	-141.69	6.02	-55.46	2.23	-7.41
	94	95	CYS	330	3.4	1.12	9.51	1.3	12.9	1.77	-3.32	0.51	-0.15	0.72	-3.46	0.96	6.22	1.2	-5.38	1.2	0.84	1.8	6.3	1.73	3.98	1.65	10.28	2.29	-1.58	0.79	-2.9	1.12	-4.48	1.48	0.01	0.01	0.14	0.03	0.16	0.04	-1.57	0.78	-2.75	1.1	-4.33	1.46	4.73	1.24	1.23
	95	96	ASN	331	10.9	1.74	10.52	1.2	21.42	2.33	-1.46	0.67	-0.55	0.86	-2.01	1.25	-84.58	2.9	-0.09	1.42	-84.68	3.47	-75.15	3.42	9.88	1.75	-65.27	4.42	-3.26	2.22	-3.39	0.76	-6.65	2.55	0.51	0.06	0.11	0.02	0.62	0.06	-2.74	2.17	-3.28	0.76	-6.03	2.5	-77.89	1.85	6.59
	96	97	ARG	332	12.82	2.74	11.32	1.48	24.14	3.26	-3.01	0.8	-0.71	0.68	-3.72	1.15	-219.95	5.51	-2.79	1.15	-222.74	5.55	-210.14	5.94	7.82	1.51	-202.32	6.41	35.07	5.24	-6.55	0.76	28.52	5.27	0.95	0.08	0.17	0.04	1.12	0.08	36.02	5.18	-6.38	0.76	29.64	5.22	-174.12	2.82	1.44
	97	98	GLN	333	13.67	2.27	10.41	1.26	24.08	2.72	0.01	0.66	0.69	0.69	0.7	1.06	-64.27	2.07	-11.41	1.2	-75.67	2.31	-50.59	2.7	-0.31	1.66	-50.89	3.4	-11	1.44	-6.21	0.89	-17.21	1.65	1.04	0.05	0.25	0.04	1.29	0.06	-9.96	1.42	-5.96	0.88	-15.92	1.62	-60.55	2.03	-6.26
	98	99	GLU	334	5.91	1.74	10.91	1.43	16.82	2.38	-1.21	0.73	-0.35	0.77	-1.55	1.17	37.41	3.74	0.56	1.65	37.97	4.49	42.11	4.22	11.12	1.77	53.23	4.91	-100.2	3.87	-10.78	1.36	-110.98	4.52	0.73	0.1	0.12	0.05	0.85	0.11	-99.47	3.82	-10.66	1.34	-110.13	4.46	-57.35	1.74	0.46
	99	100	VAL	335	6.26	1.59	10.43	1.4	16.69	2.13	-2.72	0.76	-0.75	0.94	-3.47	1.29	-22.1	0.51	-2.23	1.52	-24.33	1.59	-18.56	1.74	7.45	1.81	-11.11	2.34	6.82	0.37	-10.13	1.1	-3.31	1.08	0.02	0.02	0.01	0.01	0.02	0.03	6.83	0.36	-10.12	1.1	-3.28	1.07	-11.73	1.71	-2.67
	100	101	ASN	336	11.4	1.93	10.14	1.37	21.54	2.47	-1.85	0.59	-0.44	0.86	-2.29	1.09	-81.24	3.01	-7.28	1.16	-88.51	3.58	-71.68	3.54	2.42	1.69	-69.26	4.34	-5.04	2.51	-3.63	0.59	-8.67	2.91	0.5	0.06	0.03	0.01	0.54	0.06	-4.54	2.47	-3.6	0.59	-8.13	2.88	-76.22	1.87	-1.17
	101	102	ALA	337	2.7	0.63	11.23	1.43	13.93	1.65	-0.82	0.2	-1.67	0.61	-2.49	0.63	2.2	0.12	-3.27	0.82	-1.07	0.85	4.08	0.68	6.29	1.43	10.37	1.76	-0.22	0.06	-3.84	0.58	-4.06	0.61	0.24	0.07	0.08	0.02	0.32	0.08	0.02	0.08	-3.76	0.57	-3.74	0.58	4.1	0.7	2.53
	102	103	VAL	338	6.48	1.62	11.13	1.44	17.61	2.22	0.1	0.83	-0.36	0.84	-0.26	1.27	-21.03	0.59	-3.92	1.27	-24.94	1.28	-14.45	1.71	6.85	1.47	-7.6	2.34	5.82	0.41	-8.91	0.87	-3.09	0.77	0.69	0.07	0.02	0.01	0.7	0.07	6.51	0.42	-8.89	0.86	-2.38	0.75	-7.94	1.75	-2.04
	103	104	VAL	339	6.23	1.67	11.29	1.38	17.52	2.11	-2.41	0.82	-0.7	0.93	-3.11	1.33	-21.5	0.54	-6.15	1.01	-27.65	1.18	-17.68	2.13	4.43	1.4	-13.24	2.47	6.54	0.41	-7.86	0.45	-1.32	0.47	0.16	0.04	0.02	0.01	0.17	0.04	6.69	0.41	-7.84	0.45	-1.15	0.47	-10.99	1.96	-3.41
	104	105	LEU	340	9.7	2.11	11.42	1.32	21.12	2.76	-3.56	0.79	-2.07	0.9	-5.63	1.22	-27.31	0.36	-3.08	1.09	-30.39	1.21	-21.16	2.25	6.27	1.45	-14.9	2.81	4.08	0.26	-5.59	0.42	-1.51	0.48	0.09	0.03	0.01	0.01	0.1	0.03	4.17	0.26	-5.58	0.41	-1.41	0.47	-17	2.21	0.68
	105	106	LEU	341	9	1.85	11.63	1.48	20.63	2.45	-2.49	1.07	-1.33	0.95	-3.82	1.52	-28.46	0.44	-8.23	1.22	-36.7	1.32	-21.95	1.94	2.06	1.73	-19.89	2.73	4.48	0.32	-5.42	0.38	-0.93	0.43	0.15	0.05	0.02	0.01	0.17	0.06	4.63	0.31	-5.4	0.38	-0.77	0.43	-17.32	1.9	-3.34
	106	107	TYR	342	8.63	2.37	11.13	1.42	19.76	2.81	-2.18	0.71	-2.9	0.77	-5.07	1.14	-19.52	0.63	-10.55	1.04	-30.07	1.27	-13.06	2.5	-2.32	1.54	-15.38	3.09	-2.58	0.56	-2.21	0.31	-4.79	0.66	0.56	0.1	0	0	0.57	0.1	-2.02	0.5	-2.2	0.31	-4.22	0.61	-15.08	2.44	-4.52
	107	108	MET	343	7.16	1.71	11.39	1.24	18.55	2.3	-6.28	0.78	-3.12	0.7	-9.4	1.1	-2.78	0.47	-8.15	0.89	-10.93	1.08	-1.9	2.05	0.11	1.3	-1.78	2.59	2.9	0.35	-3.46	0.3	-0.56	0.45	0	0	0	0	0	0	2.9	0.35	-3.46	0.3	-0.56	0.45	1.01	1.97	-3.35
	108	109	ALA	344	2.75	0.75	11.12	1.28	13.87	1.51	-1.89	0.29	-2.92	0.89	-4.81	0.95	2.23	0.12	-11.25	1.32	-9.01	1.34	3.09	0.79	-3.04	1.46	0.05	1.63	-0.26	0.05	-0.16	0.37	-0.42	0.37	0.02	0.01	0	0	0.02	0.01	-0.24	0.05	-0.15	0.37	-0.4	0.37	2.84	0.8	-3.2
	109	110	THR	345	6.41	1.51	11.13	1.22	17.54	2.03	-3.09	0.73	-1.91	1.07	-5	1.28	-24.57	0.92	-12.2	1.77	-36.77	2.1	-21.24	1.7	-2.99	1.67	-24.23	2.52	1.72	0.51	-4.13	0.45	-2.41	0.58	0.08	0.04	0	0	0.08	0.04	1.8	0.49	-4.13	0.45	-2.33	0.58	-19.44	1.61	-7.12
	110	111	GLN	346	13.34	1.85	11.01	1.18	24.35	2.41	-5.67	0.83	-3.34	0.69	-9.01	1.08	-74.51	1.54	-5.57	0.74	-80.08	1.88	-66.84	2.12	2.1	1.36	-64.74	2.81	1.1	0.73	-2.67	0.36	-1.58	0.9	0.06	0.03	0.01	0.01	0.07	0.03	1.16	0.73	-2.67	0.36	-1.5	0.89	-65.68	1.93	-0.57
	111	112	ILE	347	9.54	1.95	11.18	1.12	20.72	2.29	-3.02	1.35	-1.49	0.71	-4.51	1.61	-6.67	0.25	-5.95	0.94	-12.61	0.94	-0.15	2.13	3.74	1.37	3.59	2.57	5.11	0.22	-6.02	0.37	-0.91	0.33	0	0	0	0	0	0	5.11	0.22	-6.02	0.37	-0.91	0.33	4.96	2.09	-2.28
	112	113	SER	348	3.68	0.76	11.42	1.2	15.1	1.51	-3.06	0.5	-3.28	0.88	-6.34	0.98	-3.8	1.94	-7.17	1.1	-10.96	2.25	-3.18	2.02	0.97	1.34	-2.21	2.43	1.91	1.31	-5.84	0.74	-3.94	1.25	0	0	0	0	0	0	1.91	1.31	-5.84	0.74	-3.94	1.25	-1.27	0.99	-4.87
	113	114	SER	349	3.68	0.84	11.31	1.17	14.99	1.53	-1.95	0.74	-3.28	0.7	-5.23	1.16	-5.01	1.83	-6.27	1.25	-11.28	2.4	-3.29	1.88	1.76	1.67	-1.52	2.7	1.21	1.4	-5.48	0.92	-4.27	1.85	0.13	0.03	0	0	0.13	0.03	1.34	1.39	-5.47	0.92	-4.14	1.84	-1.95	1.2	-3.71
	114	115	ALA	350	2.69	0.77	11.12	1.2	13.81	1.65	-1.93	0.43	-3.92	0.67	-5.85	0.79	2.33	0.12	-8.77	0.75	-6.44	0.78	3.1	0.91	-1.57	1.45	1.53	1.96	-0.34	0.05	0.35	0.44	0	0.45	0	0	0	0	0	0	-0.34	0.05	0.35	0.44	0	0.45	2.76	0.9	-1.22
	115	116	MET	351	7.44	1.83	10.88	1.41	18.32	2.31	-6.57	0.74	-2.98	0.74	-9.55	1	-3.72	0.33	-9.82	0.91	-13.54	0.94	-2.85	1.77	-1.91	1.67	-4.77	2.33	3.47	0.24	-3.09	0.52	0.39	0.54	0.01	0.01	0	0	0.01	0.01	3.48	0.24	-3.09	0.52	0.39	0.54	0.63	1.77	-5
	116	117	GLU	352	7.49	1.79	10.87	1.47	18.36	2.46	-3.63	0.83	-2.46	0.86	-6.09	1.16	41.13	15.27	-4.94	1.11	36.19	15.29	44.98	14.62	3.47	1.84	48.46	14.96	-99.98	14.3	-7.19	1.01	-107.17	14.14	0.3	0.1	0	0	0.31	0.1	-99.68	14.21	-7.19	1.01	-106.87	14.04	-54.7	1.85	-3.71
	117	118	TYR	353	8.26	1.97	10.71	1.23	18.97	2.61	-3.69	0.73	-2.58	0.74	-6.27	1.11	-20.67	1.66	-7.65	1.09	-28.32	1.75	-16.09	2.28	0.48	1.51	-15.62	2.85	-1.5	1.09	-0.31	0.56	-1.81	1.14	0.29	0.06	0	0.01	0.3	0.06	-1.21	1.06	-0.31	0.57	-1.51	1.11	-17.3	2.02	0.17
	118	119	LEU	354	8.78	1.75	11.53	1.31	20.31	2.25	-3.48	0.71	-2.45	0.78	-5.93	1.06	-27.22	0.37	-9.65	1.27	-36.87	1.32	-21.92	1.86	-0.58	1.55	-22.49	2.36	3.67	0.22	-2.38	0.67	1.3	0.65	0.08	0.02	0	0	0.08	0.02	3.75	0.22	-2.37	0.67	1.38	0.65	-18.16	1.83	-2.95
	119	120	GLU	355	5.57	1.52	11.14	1.13	16.71	1.99	-3.91	0.87	-1.66	0.86	-5.58	1.33	19.73	4.4	-1.46	1.25	18.27	4.87	21.39	4.27	8.02	1.48	29.41	4.76	-75.93	3.57	-6.59	0.88	-82.52	3.9	0.2	0.03	0.05	0.01	0.25	0.04	-75.73	3.56	-6.53	0.88	-82.27	3.89	-54.34	1.96	1.48
	120	121	LYS	356	11.32	2.51	11.17	1.33	22.49	2.87	-0.96	0.75	-0.81	0.54	-1.77	0.97	-40.08	21.24	0.33	1.26	-39.75	21.11	-29.71	21.25	10.68	1.68	-19.03	21.17	11.99	20.1	-3.35	0.98	8.64	19.82	0.99	0.13	0.24	0.03	1.23	0.11	12.98	20.01	-3.12	0.96	9.86	19.74	-16.74	2.82	7.57
	121	122	LYS	357	12.02	2.21	10.41	1.46	22.43	2.9	-3.34	0.91	-0.54	0.67	-3.88	1.28	-31.71	9.13	-9.8	1.31	-41.51	9.17	-23.03	9.51	0.07	1.62	-22.96	9.64	3.31	8.18	-2.68	0.98	0.63	8.39	0.47	0.08	0.12	0.02	0.59	0.09	3.78	8.14	-2.56	0.97	1.22	8.34	-19.25	2.62	-2.49
	122	123	ASN	358	11.3	1.88	10.89	1.52	22.19	2.4	-0.51	0.6	-0.47	0.79	-0.98	1.2	-75.3	1.31	-15.4	1.41	-90.7	1.87	-64.51	2.06	-4.99	2.2	-69.5	2.74	-11.4	1.04	-0.51	1.08	-11.9	1.43	0.77	0.05	0.1	0.02	0.87	0.06	-10.63	1.01	-0.41	1.07	-11.04	1.4	-75.14	1.64	-5.4
	123	124	PHE	359	8.67	2.2	10.08	1.33	18.76	2.68	-1.77	0.7	-1.06	0.78	-2.83	1.13	1.26	0.89	-1.57	0.95	-0.31	1.49	8.16	2.29	7.45	1.34	15.61	2.51	-1.04	0.65	-6.29	0.55	-7.34	0.95	0.36	0.05	0.03	0.01	0.39	0.05	-0.68	0.62	-6.27	0.55	-6.95	0.93	7.48	2.24	1.18
	124	125	ILE	360	9.33	1.81	10.42	1.39	19.75	2.45	-1.89	0.87	0.1	0.77	-1.79	1.22	-5.44	0.4	-3.78	1.18	-9.22	1.19	2	1.91	6.75	1.61	8.74	2.62	3.15	0.33	-5.74	1.03	-2.59	0.98	0.35	0.06	0.14	0.02	0.49	0.06	3.5	0.34	-5.6	1.02	-2.1	0.95	5.5	1.89	1.14
	125	126	HIS	361	24.82	1.83	11.61	1.24	36.43	2.25	-6.81	0.6	-0.72	0.88	-7.53	1.13	-13.27	1.12	-3.31	1.33	-16.58	1.85	4.73	2.01	7.59	1.52	12.32	2.67	-0.57	0.64	-3.48	0.77	-4.05	1.16	0.08	0.02	0.14	0.02	0.22	0.03	-0.49	0.64	-3.34	0.76	-3.83	1.14	4.24	1.91	4.25
	126	127	ARG	362	13.63	2.83	11.32	1.22	24.95	3.08	-2.74	0.68	-1.23	0.58	-3.97	0.89	-187.25	4.39	-12.86	0.96	-200.12	4.36	-176.36	5.14	-2.78	1.45	-179.14	5.2	2.48	4.28	-1	0.5	1.48	4.08	0.91	0.08	0.08	0.03	0.99	0.08	3.39	4.31	-0.92	0.49	2.47	4.1	-172.97	2.5	-3.7
	127	128	ASP	363	4.9	1.6	10.08	1.27	14.98	2.14	-0.7	1.15	-0.29	0.94	-0.99	1.51	-24.36	3.41	-11.12	1.39	-35.48	4	-20.16	3.44	-1.33	1.55	-21.48	4.01	-42.31	2.88	-6.84	0.58	-49.15	3.25	0.07	0.03	0	0	0.08	0.03	-42.24	2.87	-6.84	0.58	-49.07	3.25	-62.39	1.74	-8.17
	128	129	LEU	364	8.57	1.63	10.94	1.3	19.51	2.24	-4.4	0.8	-1.95	0.74	-6.35	1.25	-27.83	0.31	0.02	0.58	-27.82	0.66	-23.66	1.68	9	1.46	-14.66	2.34	4.03	0.18	-6.06	0.48	-2.03	0.45	0	0	0.02	0.01	0.02	0.01	4.03	0.18	-6.05	0.48	-2.02	0.45	-19.63	1.68	2.95
	129	130	ALA	365	2.48	0.76	9.86	1.23	12.34	1.53	-1.38	0.57	-3.41	0.69	-4.79	0.84	2.56	0.15	-10.01	1.09	-7.45	1.12	3.66	0.98	-3.56	1.6	0.11	2.04	-0.44	0.08	0.68	0.33	0.24	0.37	0	0	0	0	0	0	-0.44	0.08	0.68	0.33	0.24	0.37	3.22	0.97	-2.88
	130	131	ALA	366	2.68	0.81	10.91	1.31	13.59	1.6	-2.32	0.32	-3.3	0.84	-5.62	0.86	2.03	0.14	-1.9	0.98	0.12	0.99	2.38	0.88	5.71	1.51	8.09	1.87	-0.02	0.05	-0.09	0.35	-0.11	0.35	0	0	0	0	0	0	-0.02	0.05	-0.09	0.35	-0.11	0.35	2.36	0.87	5.62
	131	132	ARG	367	13.38	2.82	10.5	1.39	23.88	3.17	-6.18	1.12	-2.16	0.74	-8.34	1.49	-216.34	4	-2.6	0.85	-218.94	4.12	-209.14	4.16	5.74	1.24	-203.4	4.34	33.13	3.24	-4.59	0.53	28.54	3.21	0.12	0.03	0	0	0.13	0.03	33.25	3.24	-4.59	0.53	28.66	3.2	-175.89	2.8	1.15
	132	133	ASN	368	12.46	2.19	10.33	1.43	22.78	2.72	-3.71	1.12	-1.67	0.82	-5.38	1.43	-84.4	1.93	-14.42	1.01	-98.82	2.11	-75.65	2.07	-5.76	1.53	-81.41	2.56	-2.33	0.83	-0.19	0.34	-2.52	0.92	0	0	0	0	0	0	-2.33	0.83	-0.19	0.34	-2.52	0.92	-77.98	1.72	-5.95
	133	134	CYS	369	2.96	1.01	9.77	1.53	12.73	2.03	-4.29	0.4	-2.04	0.89	-6.33	0.95	6.21	0.42	-7.73	0.92	-1.52	1.06	4.88	1.12	0	1.64	4.88	2.13	-1.51	0.14	0.3	0.43	-1.21	0.42	0	0	0	0	0	0	-1.51	0.14	0.3	0.43	-1.21	0.42	3.37	1.12	0.3
	134	135	LEU	370	8.76	1.99	9.88	1.12	18.64	2.47	-3.25	0.81	-1.97	1	-5.22	1.31	-26.67	0.42	-3.59	1	-30.26	1.05	-21.16	2.09	4.33	1.56	-16.84	2.56	3.31	0.3	-4.06	0.47	-0.75	0.52	0.06	0.03	0	0	0.06	0.03	3.38	0.3	-4.06	0.47	-0.68	0.51	-17.79	2.04	0.27
	135	136	VAL	371	6.4	1.75	9.28	1.23	15.68	2.25	-3.4	0.83	-2.13	0.99	-5.53	1.34	-22.68	0.43	-8.43	1.08	-31.12	0.99	-19.68	1.85	-1.28	1.52	-20.96	2.46	7.1	0.34	-6.86	0.77	0.24	0.64	0	0.01	0	0	0	0.01	7.11	0.34	-6.86	0.77	0.24	0.64	-12.58	1.78	-8.14
	136	137	GLY	372	0	0	9.02	1.41	9.02	1.41	0	0	-3.32	0.74	-3.32	0.74	0	0	-9.66	1.25	-9.66	1.25	0	0	-3.96	1.63	-3.96	1.63	0	0	-4.38	0.86	-4.38	0.86	0	0	0.01	0.01	0.01	0.01	0	0	-4.37	0.86	-4.37	0.86	0	0	-8.33
	137	138	GLU	373	6.17	1.71	9.45	1.3	15.63	2.35	-0.63	0.91	-0.64	0.7	-1.27	1.32	27.87	3.06	1.85	1.01	29.72	3.12	33.41	3.42	10.66	1.54	44.08	3.62	-89.61	2.98	-10.65	0.67	-100.25	3.06	0.73	0.03	0.05	0.02	0.79	0.03	-88.87	2.99	-10.6	0.67	-99.47	3.06	-55.46	1.67	0.07
	138	139	ASN	374	10.9	1.68	10.8	1.37	21.7	2.27	-0.04	0.45	-0.15	0.7	-0.19	1.02	-74.72	1.6	-5.25	0.92	-79.97	1.86	-63.86	1.91	5.41	1.51	-58.46	2.52	-13.08	1.38	-3.79	0.79	-16.87	1.74	0.89	0.03	0.16	0.02	1.05	0.05	-12.19	1.37	-3.63	0.78	-15.82	1.71	-76.05	1.31	1.77
	139	140	HIS	375	24.8	1.64	11.39	1.5	36.19	2.52	-4.01	0.79	-1.43	0.76	-5.43	1.22	-10.42	2.22	-6.13	1.22	-16.55	2.6	10.37	2.8	3.84	1.7	14.21	3.55	-3.9	1.83	-4.36	0.71	-8.25	2.02	0.34	0.11	0.03	0.02	0.37	0.12	-3.55	1.75	-4.33	0.71	-7.88	1.96	6.82	1.92	-0.49
	140	141	LEU	376	8.88	1.96	10.34	1.18	19.22	2.47	-1.75	0.85	-1.42	0.85	-3.17	1.21	-27.87	0.39	-3.4	1.11	-31.27	1.15	-20.74	2.19	5.51	1.57	-15.22	2.89	3.91	0.23	-5.34	0.56	-1.43	0.51	0.43	0.05	0	0	0.43	0.05	4.35	0.23	-5.34	0.56	-0.99	0.53	-16.39	2.14	0.17
	141	142	VAL	377	5.81	1.84	9.97	1.25	15.78	2.46	-3.62	0.84	-1.63	0.88	-5.24	1.28	-21.85	0.42	-2.56	0.85	-24.41	0.83	-19.65	2.01	5.78	1.38	-13.87	2.53	6.53	0.29	-7.03	0.45	-0.5	0.36	0	0	0	0	0	0	6.53	0.29	-7.03	0.45	-0.5	0.36	-13.13	1.96	-1.25
	142	143	LYS	378	10.8	2.16	9.94	1.3	20.74	2.53	-4.43	1.2	-2.05	0.86	-6.48	1.47	-65.37	3.76	-7.92	0.8	-73.3	3.8	-59.01	3.97	-0.03	1.24	-59.03	4.28	36.74	3.4	-1.9	0.35	34.84	3.38	0.14	0.03	0	0	0.14	0.03	36.88	3.4	-1.9	0.35	34.98	3.38	-22.12	2.38	-1.93
	143	144	VAL	379	5.82	1.47	9.78	1.23	15.61	2.02	-3.09	0.67	-1.56	0.69	-4.66	1.03	-20.83	0.32	-11.9	0.89	-32.72	0.91	-18.1	1.58	-3.68	1.51	-21.78	2.17	5.41	0.27	-5.82	0.51	-0.41	0.39	0.01	0.01	0	0.01	0.01	0.01	5.42	0.27	-5.82	0.51	-0.4	0.38	-12.68	1.56	-9.49
	144	145	ALA	380	2.59	0.85	10.46	1.47	13.04	1.93	-1.19	0.5	-1.78	0.82	-2.97	1	2.24	0.11	-6.7	1.04	-4.46	1.07	3.63	0.94	1.98	1.61	5.61	1.96	-0.3	0.07	-3.48	0.52	-3.78	0.55	0	0	0.06	0.02	0.06	0.02	-0.3	0.07	-3.42	0.52	-3.72	0.55	3.33	0.93	-1.44
	145	146	ASP	381	3.95	1.32	9.67	1.14	13.61	1.91	-2.01	0.74	-1.36	0.68	-3.37	1.05	-2.39	5.05	-4.45	1.16	-6.84	5.12	-0.45	5.15	3.85	1.61	3.4	5.45	-58.06	5.07	-3.99	0.9	-62.05	5.13	0.32	0.04	0	0.01	0.32	0.04	-57.74	5.06	-3.99	0.9	-61.73	5.11	-58.2	1.38	-0.14
	146	147	PHE	382	8.37	2.16	9.56	1.59	17.93	2.9	-3.3	0.7	-1.3	0.71	-4.61	1.07	0.71	0.44	-6.28	1.08	-5.58	1.2	5.78	2.26	1.98	1.69	7.75	3	0.52	0.28	-1.66	0.69	-1.14	0.74	0.04	0.02	0.03	0.02	0.07	0.03	0.56	0.28	-1.63	0.68	-1.07	0.74	6.34	2.28	0.35
	147	148	GLY	383	0	0	9.08	1.51	9.08	1.51	0	0	-1.68	0.73	-1.68	0.73	0	0	-11.67	1.98	-11.67	1.98	0	0	-4.27	2.25	-4.27	2.25	0	0	0.93	0.98	0.93	0.98	0	0	0.16	0.05	0.16	0.05	0	0	1.09	0.96	1.09	0.96	0	0	-3.19
	148	149	LEU	384	9.02	2.26	11.15	1.42	20.17	2.78	-2.57	0.72	-1.25	0.83	-3.82	1.11	-25.61	0.4	-8.26	1.28	-33.87	1.24	-19.16	2.46	1.64	1.6	-17.52	2.76	2.29	0.29	-1.33	0.66	0.95	0.59	0.1	0.04	0	0	0.1	0.04	2.39	0.29	-1.33	0.66	1.06	0.58	-16.77	2.44	0.3
	149	150	SER	385	3.63	1.02	10.63	1.35	14.26	1.77	-1.6	0.39	-1.19	0.81	-2.79	1.03	-2.93	1.14	-6.73	3.09	-9.66	2.97	-0.9	1.7	2.71	3.16	1.81	3.13	-0.64	1.06	-1.51	2.22	-2.15	2	0.24	0.05	0.04	0.04	0.28	0.05	-0.39	1.05	-1.47	2.2	-1.87	2	-1.3	1.18	1.24
	150	151	ARG	386	13	2.76	10.36	1.35	23.37	3.09	-0.02	1.38	0.39	0.77	0.37	1.59	-193.03	15.44	-2.3	0.88	-195.33	15.25	-180.05	14.93	8.46	1.43	-171.59	14.85	4.38	12.16	-4.7	0.79	-0.31	11.96	1.17	0.17	0.25	0.05	1.42	0.16	5.56	12.09	-4.45	0.77	1.11	11.9	-174.5	3.81	4.01
	151	152	LEU	387	8.7	2.01	11.33	1.42	20.03	2.59	-1.08	0.85	0.12	0.77	-0.96	1.21	-25.59	0.51	-7.14	1.07	-32.74	1.02	-17.97	2.31	4.3	1.61	-13.67	2.69	1.68	0.36	-5.93	0.71	-4.25	0.63	0.47	0.09	0.21	0.03	0.68	0.08	2.14	0.33	-5.72	0.71	-3.57	0.65	-15.82	2.28	-1.42
	152	153	MET	388	6.74	1.7	10.03	1.31	16.77	2.3	-3.43	0.7	-0.42	0.95	-3.86	1.1	-0.55	0.67	-10.21	2.58	-10.76	2.58	2.75	1.85	-0.6	2.7	2.15	3.32	-0.15	0.59	-1.72	1.67	-1.87	1.71	0.55	0.08	0.03	0.01	0.58	0.09	0.4	0.59	-1.69	1.67	-1.29	1.7	3.15	1.84	-2.29
	153	154	THR	389	6.4	1.53	9.69	1.22	16.09	2.12	-0.41	0.82	0.09	0.58	-0.32	1.11	-25.7	2.14	-7.89	1.46	-33.59	2.6	-19.71	2.33	1.89	1.68	-17.82	3.05	0.32	1.25	-6.06	0.97	-5.73	1.56	0.46	0.1	0.23	0.03	0.7	0.1	0.79	1.19	-5.82	0.97	-5.04	1.52	-18.92	1.75	-3.94
	154	155	GLY	390	0	0	10	1.6	10	1.6	0	0	-1.12	0.83	-1.12	0.83	0	0	-6.8	1.32	-6.8	1.32	0	0	2.08	2.37	2.08	2.37	0	0	-5.6	1.9	-5.6	1.9	0	0	0.32	0.05	0.32	0.05	0	0	-5.28	1.86	-5.28	1.86	0	0	-3.2
	155	156	ASP	391	4.18	1.56	10.68	1.34	14.86	2.19	-0.65	0.65	-0.44	0.73	-1.09	1.05	6.87	10.23	-3.34	3.4	3.53	12.58	10.4	10.26	6.9	3.43	17.3	12.57	-72.06	9.97	-9.67	2.49	-81.73	11.87	0.66	0.1	0.1	0.05	0.76	0.12	-71.4	9.89	-9.58	2.46	-80.98	11.77	-61	1.37	-2.68
	156	157	THR	392	6.77	1.61	11.61	1.41	18.38	2.25	-2.25	0.66	-1.28	0.85	-3.54	1.19	-20.15	2	-7.17	1.04	-27.32	2.06	-15.63	2.55	3.16	1.41	-12.48	3.03	-2.55	1.53	-5.42	0.71	-7.97	1.83	0.21	0.06	0.02	0.01	0.22	0.06	-2.34	1.49	-5.4	0.7	-7.74	1.79	-17.97	1.8	-2.24
	157	158	TYR	393	8.18	1.84	10.04	1.28	18.22	2.34	-4.72	1.09	-2.02	0.81	-6.74	1.35	-25.02	1.42	-6.58	1.42	-31.6	2.18	-21.56	2.18	1.45	1.71	-20.11	3.07	-0.28	0.44	-2.28	0.99	-2.56	1.13	0.02	0.02	0	0	0.02	0.02	-0.25	0.43	-2.28	0.98	-2.53	1.13	-21.81	2.12	-0.83
	158	159	THR	394	6.11	1.22	10.07	1.27	16.19	1.94	-2.27	0.67	-1.15	0.89	-3.42	1.23	-21.11	1.99	-13.69	1.15	-34.8	2.67	-17.26	2.34	-4.77	1.56	-22.03	3.18	-1.83	1.48	-2.08	0.73	-3.91	1.79	0.17	0.03	0.01	0.01	0.18	0.04	-1.66	1.49	-2.07	0.73	-3.73	1.79	-18.92	1.33	-6.84
	159	160	ALA	395	2.85	0.88	9.94	1.25	12.79	1.69	-0.75	0.26	-0.86	0.6	-1.61	0.64	2.42	0.14	1.39	1.26	3.81	1.28	4.52	0.9	10.48	1.61	14.99	2.15	-0.34	0.09	-7.34	0.95	-7.68	0.98	0.37	0.07	0.18	0.03	0.55	0.07	0.03	0.14	-7.16	0.95	-7.13	0.98	4.55	0.91	3.32
	160	161	HIS	396	24.81	1.75	10.14	1.32	34.94	2.22	-5.22	0.71	-0.5	0.86	-5.72	1.11	-12.18	1.43	-7.4	1.36	-19.58	2.17	7.41	2.57	2.23	1.94	9.64	3.47	-3.15	1.12	-3.25	0.97	-6.41	1.58	0.26	0.08	0.05	0.02	0.31	0.08	-2.89	1.08	-3.2	0.97	-6.09	1.56	4.51	2.04	-0.97
	161	162	ALA	397	2.71	1.08	10.12	1.19	12.82	1.76	-0.39	0.35	0.01	0.52	-0.38	0.73	2	0.12	-2.25	1.18	-0.24	1.17	4.32	1.11	7.88	1.68	12.2	2.21	0.17	0.06	-7.3	0.89	-7.13	0.87	0.27	0.08	0.4	0.05	0.68	0.11	0.44	0.09	-6.9	0.88	-6.46	0.81	4.76	1.13	0.98
	162	163	GLY	398	0	0	9.37	1.55	9.37	1.55	0	0	0.2	0.6	0.2	0.6	0	0	-6.43	0.99	-6.43	0.99	0	0	3.13	1.64	3.13	1.64	0	0	-6.64	0.77	-6.64	0.77	0	0	0.66	0.05	0.66	0.05	0	0	-5.98	0.75	-5.98	0.75	0	0	-2.85
	163	164	ALA	399	2.45	0.97	9.04	1.35	11.49	2.01	-0.78	0.27	0.27	0.83	-0.51	0.92	2.23	0.13	0.19	0.88	2.42	0.92	3.9	1.01	9.5	1.52	13.4	2.18	0.05	0.09	-3.1	0.6	-3.05	0.64	0.18	0.07	0.09	0.03	0.27	0.07	0.24	0.1	-3.01	0.61	-2.78	0.62	4.14	1.01	6.49
	164	165	LYS	400	10.82	2.19	9.97	1.2	20.79	2.41	-2.31	0.83	-0.82	0.62	-3.13	1.11	-20.33	7.48	-2.87	0.97	-23.2	7.11	-11.82	7.91	6.28	1.47	-5.54	7.74	-6.01	7.36	-4.63	0.8	-10.64	7.16	0.54	0.15	0.18	0.02	0.72	0.15	-5.46	7.23	-4.45	0.79	-9.92	7.03	-17.28	2.33	1.82
	165	166	PHE	401	7.48	1.87	11.72	1.36	19.2	2.19	-3.95	0.86	-1.2	0.72	-5.15	1.06	0.88	0.4	-5.2	0.95	-4.32	1.04	4.4	2.26	5.33	1.5	9.73	2.61	-0.24	0.36	-0.72	0.49	-0.97	0.67	0.04	0.04	0.01	0.01	0.05	0.04	-0.2	0.33	-0.72	0.49	-0.92	0.64	4.2	2.19	4.61
	166	167	PRO	402	12.74	1.57	15.45	1.08	28.19	2.13	-3.34	0.69	-2.27	0.8	-5.61	1.11	-5.5	0.64	-3.04	1.33	-8.54	1.15	3.9	1.67	10.14	1.68	14.04	2.46	5.2	0.6	-6.87	0.67	-1.67	0.36	0.06	0.02	0	0	0.06	0.02	5.26	0.6	-6.87	0.67	-1.61	0.35	9.16	1.62	3.27
	167	168	ILE	403	9.74	1.92	12.82	1.29	22.56	2.5	-3.36	0.93	-1.92	0.73	-5.28	1.29	-5.25	0.32	2	0.91	-3.24	0.92	1.13	1.79	12.9	1.45	14.04	2.37	3.37	0.27	-7.33	0.65	-3.96	0.64	0.03	0.01	0.01	0.01	0.03	0.02	3.4	0.28	-7.32	0.65	-3.92	0.64	4.53	1.78	5.58
	168	169	LYS	404	11.48	2.44	10.54	1.53	22.02	2.96	-4.16	0.91	-1.87	0.85	-6.03	1.24	-59.65	9.59	-3.67	0.88	-63.32	9.5	-52.34	10	5	1.54	-47.34	10.06	33.87	7.84	-4.41	0.53	29.46	7.87	0.12	0.04	0	0	0.12	0.04	33.99	7.81	-4.4	0.53	29.58	7.85	-18.35	3.37	0.6
	169	170	TRP	405	11.62	2.32	10.31	1.42	21.93	2.93	-9.1	0.76	-2.1	0.77	-11.19	1.17	-2.66	1.18	-11.12	0.8	-13.78	1.52	-0.14	2.7	-2.91	1.49	-3.05	3.17	3.92	0.37	-3.64	0.41	0.28	0.53	0.07	0.02	0	0	0.07	0.03	4	0.37	-3.64	0.41	0.36	0.53	3.86	2.63	-6.55
	170	171	THR	406	6.53	1.41	10.28	1.39	16.8	2.14	-3.16	0.69	-1.95	0.72	-5.11	1.03	-24.2	1.03	-7.16	0.91	-31.37	1.55	-20.84	1.92	1.16	1.69	-19.68	2.68	2.18	0.84	-6.82	0.77	-4.64	1.28	0.02	0.01	0.03	0.01	0.05	0.02	2.2	0.84	-6.8	0.77	-4.6	1.27	-18.64	1.57	-5.63
	171	172	ALA	407	2.64	0.78	11.12	1.42	13.77	1.73	-2.23	0.42	-2.5	0.66	-4.73	0.7	2.39	0.11	2.26	1	4.65	1.04	2.8	0.88	10.89	1.61	13.69	1.92	-0.2	0.06	-0.98	0.45	-1.18	0.47	0	0	0.01	0.01	0.01	0.01	-0.2	0.06	-0.98	0.45	-1.18	0.47	2.6	0.88	9.91
	172	173	PRO	408	12.27	1.34	14.28	1.29	26.55	2.07	-4.27	0.63	-2.63	0.73	-6.9	0.97	-10.18	0.74	-1.44	1.4	-11.62	1.16	-2.18	1.65	10.21	1.73	8.03	2.21	9.33	0.69	-10.46	0.95	-1.13	0.57	0.02	0.02	0.01	0.01	0.03	0.02	9.35	0.7	-10.46	0.95	-1.1	0.57	7.17	1.44	-0.24
	173	174	GLU	409	7.91	1.84	10.92	1.43	18.83	2.51	-1.99	1.33	-2.09	0.95	-4.08	1.9	-28.31	3.91	-10.07	1.45	-38.38	4.52	-22.39	3.8	-1.24	1.89	-23.63	4.47	-36.4	3.05	-3.89	0.85	-40.3	3.41	0.1	0.04	0.01	0.01	0.1	0.04	-36.31	3.04	-3.88	0.85	-40.19	3.41	-58.69	1.89	-5.12
	174	175	SER	410	3.82	1.05	10.96	1.27	14.78	1.72	-2.47	0.67	-2.67	0.84	-5.15	1.02	-5.95	0.76	-7.06	1.03	-13.01	1.12	-4.6	1.2	1.22	1.61	-3.38	1.77	0.7	0.38	-2.62	0.79	-1.92	0.72	0	0	0	0	0	0.01	0.7	0.38	-2.61	0.78	-1.91	0.72	-3.9	1.12	-1.39
	175	176	LEU	411	8.5	1.66	11.05	1.41	19.55	2.31	-4.39	1.05	-1.54	0.81	-5.93	1.41	-26.9	0.49	-4.09	1.32	-30.99	1.35	-22.79	1.84	5.43	1.61	-17.36	2.65	3.43	0.32	-5.64	0.83	-2.21	0.78	0	0	0.03	0.02	0.03	0.02	3.43	0.32	-5.6	0.83	-2.17	0.77	-19.36	1.86	-0.18
	176	177	ALA	412	2.49	0.76	11.19	1.48	13.68	1.86	-1.27	0.32	-1.06	0.7	-2.33	0.76	2.27	0.13	-6.15	1.23	-3.88	1.24	3.49	0.86	3.99	1.64	7.48	2.05	-0.08	0.08	-4.76	0.57	-4.84	0.61	0.11	0.04	0.23	0.03	0.34	0.05	0.03	0.09	-4.53	0.56	-4.51	0.6	3.52	0.84	-0.55
	177	178	TYR	413	8.67	2.29	9.67	1.45	18.35	2.94	0.83	0.62	0.06	0.76	0.89	1.01	-16.45	0.66	-5.63	0.89	-22.08	1.07	-6.94	2.48	4.1	1.72	-2.84	3.1	-6.36	0.66	-3.58	0.77	-9.94	0.84	1.04	0.1	0.19	0.02	1.23	0.1	-5.31	0.61	-3.39	0.75	-8.71	0.8	-12.26	2.36	0.71
	178	179	ASN	414	11.72	1.76	10.36	1.46	22.08	2.45	-1.01	0.56	-0.52	0.78	-1.52	1.08	-76.68	1.33	-2.85	1.81	-79.53	2.29	-65.97	1.98	6.99	2.21	-58.98	3.07	-9.56	1.14	-2.43	1.34	-11.99	1.81	0.6	0.09	0.11	0.02	0.71	0.1	-8.96	1.09	-2.32	1.34	-11.28	1.78	-74.92	1.5	4.67
	179	180	LYS	415	11.19	2.32	9.82	1.38	21.01	2.93	-1.75	0.77	-0.83	0.92	-2.58	1.32	-5.81	2.36	-4.06	1.18	-9.87	2.8	3.63	3.41	4.94	1.85	8.57	3.9	-21.16	2.53	-4.59	0.7	-25.75	2.78	0.98	0.08	0.03	0.01	1.01	0.07	-20.18	2.5	-4.56	0.7	-24.74	2.75	-16.55	2.53	0.38
	180	181	PHE	416	8.02	1.87	9.96	1.26	17.98	2.24	-2.31	0.64	-1.2	0.57	-3.51	0.94	0.16	0.63	-11.09	1.16	-10.93	1.2	5.87	2.3	-2.33	1.73	3.54	2.91	-0.17	0.45	-2.95	1.02	-3.12	1.03	0.26	0.06	0.19	0.04	0.44	0.08	0.09	0.42	-2.76	0.99	-2.68	0.98	5.96	2.25	-5.09
	181	182	SER	417	3.08	0.85	9.92	1.3	13	1.65	-1.34	0.5	-0.59	0.99	-1.94	1.22	-1.68	1.74	-4.78	1.47	-6.46	2.69	0.05	1.74	4.56	1.79	4.61	2.86	-2.85	1.37	-4.4	0.8	-7.25	1.88	0.28	0.05	0.04	0.01	0.32	0.05	-2.57	1.37	-4.35	0.8	-6.92	1.89	-2.52	0.99	0.2
	182	183	ILE	418	9.61	2.27	11.34	1.57	20.95	2.75	-1.99	1.13	-0.18	0.92	-2.17	1.61	-5.68	0.47	3.7	1.22	-1.98	1.42	1.94	2.51	14.86	1.75	16.8	3.14	3.86	0.32	-7.53	0.64	-3.67	0.74	0.19	0.05	0.01	0.01	0.2	0.05	4.05	0.32	-7.51	0.63	-3.46	0.71	5.99	2.39	7.34
	183	184	LYS	419	11.63	1.93	11.4	1.45	23.02	2.44	-4.09	1.01	-1.41	0.85	-5.49	1.42	-56.09	4.82	-9.09	0.99	-65.18	4.88	-48.55	5.15	0.9	1.65	-47.64	5.32	30.93	4.4	-3.82	0.6	27.11	4.4	0.38	0.04	0	0	0.38	0.04	31.31	4.39	-3.82	0.6	27.49	4.4	-17.24	2.32	-2.91
	184	185	SER	420	3.53	0.94	11.02	1.48	14.55	2.03	-2.04	0.92	-2.95	0.64	-4.99	1.2	-11.7	1.57	-14.46	0.87	-26.16	1.72	-10.21	1.4	-6.4	1.49	-16.6	2.2	3.64	0.38	-4.33	0.6	-0.69	0.52	0.01	0.01	0.01	0.01	0.03	0.01	3.65	0.38	-4.31	0.6	-0.66	0.52	-6.55	1.25	-10.71
	185	186	ASP	421	4.48	1.47	10.73	1.27	15.21	2.02	-4.31	0.74	-2.26	0.84	-6.56	1.07	-3.37	2.4	-2.11	0.89	-5.47	2.68	-3.2	2.61	6.37	1.51	3.17	3.02	-53.87	2.14	-8.36	0.43	-62.23	2.3	0.01	0.01	0	0	0.02	0.01	-53.86	2.14	-8.36	0.43	-62.22	2.3	-57.06	1.35	-1.99
	186	187	VAL	422	5.89	1.36	11.36	1.33	17.24	1.97	-3.74	0.63	-1.83	0.83	-5.57	1.15	-20.88	0.41	-6.32	1.09	-27.19	1.12	-18.72	1.44	3.21	1.57	-15.52	2.1	5.93	0.26	-7.35	0.4	-1.42	0.37	0	0	0	0	0	0	5.93	0.26	-7.35	0.4	-1.42	0.37	-12.8	1.43	-4.14
	187	188	TRP	423	11.04	2.4	11.28	1.2	22.32	2.79	-10.42	0.73	-3.71	0.72	-14.13	1.08	5.95	0.81	-9.52	0.85	-3.57	1.01	6.57	2.59	-1.95	1.48	4.62	3.13	0.12	0.5	-2.85	0.46	-2.72	0.59	0.02	0.01	0	0	0.02	0.01	0.14	0.5	-2.85	0.46	-2.71	0.58	6.71	2.55	-4.8
	188	189	ALA	424	2.53	0.72	10.81	1.04	13.34	1.39	-2.05	0.34	-3.56	0.79	-5.6	0.87	2.18	0.11	-9.32	0.99	-7.14	1	2.66	0.78	-2.06	1.36	0.59	1.73	-0.21	0.06	-0.67	0.4	-0.88	0.43	0.04	0.01	0	0	0.04	0.01	-0.17	0.06	-0.67	0.4	-0.84	0.42	2.49	0.79	-2.73
	189	190	PHE	425	7.84	1.76	9.95	1.2	17.79	2.28	-4.46	0.74	-2.26	1.02	-6.72	1.23	0.43	0.3	-8.69	1.02	-8.26	1.07	3.81	2.02	-1	1.3	2.81	2.58	0.38	0.18	-2.07	0.4	-1.69	0.44	0	0	0	0	0	0	0.38	0.18	-2.07	0.4	-1.69	0.44	4.19	2.01	-3.07
	190	191	GLY	426	0	0	9.42	1.52	9.42	1.52	0	0	-5.13	0.71	-5.13	0.71	0	0	-7.75	1.07	-7.75	1.07	0	0	-3.46	1.67	-3.46	1.67	0	0	-1.34	0.5	-1.34	0.5	0	0	0	0	0	0	0	0	-1.34	0.5	-1.34	0.5	0	0	-4.8
	191	192	VAL	427	5.88	1.54	10.75	1.26	16.62	1.96	-3.67	0.86	-1.63	0.9	-5.3	1.37	-20.81	0.47	-6.37	0.94	-27.18	0.94	-18.6	1.75	2.75	1.42	-15.86	2.35	5.6	0.29	-6.79	0.48	-1.19	0.36	0	0	0	0	0	0	5.6	0.29	-6.79	0.48	-1.19	0.36	-13	1.7	-4.05
	192	193	LEU	428	9.64	1.84	11.75	1.38	21.39	2.32	-4.15	1.04	-2.02	0.96	-6.17	1.38	-28.08	0.34	-3.87	0.9	-31.95	0.95	-22.59	1.98	5.86	1.63	-16.73	2.52	4.11	0.19	-5.16	0.33	-1.05	0.3	0	0	0	0	0	0	4.11	0.19	-5.16	0.33	-1.05	0.3	-18.48	1.97	0.7
	193	194	LEU	429	8.46	1.67	11.11	1.39	19.58	2.35	-3.92	0.86	-2.32	0.77	-6.25	1.29	-27.71	0.36	-4.94	1.27	-32.66	1.22	-23.18	1.91	3.85	1.73	-19.33	2.69	4.15	0.2	-5.36	0.72	-1.21	0.62	0.02	0.01	0.01	0.01	0.02	0.01	4.16	0.2	-5.35	0.71	-1.19	0.62	-19.01	1.92	-1.5
	194	195	TRP	430	10.9	1.93	11.29	1.15	22.19	2.3	-8.92	0.87	-3.22	0.82	-12.15	1.31	5.33	1.29	-13.15	1.33	-7.82	1.99	7.31	2.42	-5.08	1.48	2.22	2.96	0.41	0.68	-2.55	0.36	-2.14	0.84	0.11	0.06	0	0	0.11	0.06	0.52	0.65	-2.55	0.36	-2.03	0.81	7.83	2.15	-7.63
	195	196	GLU	431	6.16	1.91	11.41	1.39	17.56	2.6	-5.46	0.94	-2.89	0.79	-8.35	1.34	4.08	2.82	-3.94	1.02	0.13	3.14	4.77	3.1	4.58	1.51	9.35	3.69	-58.38	2.57	-8.08	0.55	-66.46	2.83	0.01	0.01	0	0	0.01	0.01	-58.37	2.57	-8.08	0.55	-66.45	2.83	-53.6	1.99	-3.5
	196	197	ILE	432	9.41	2.13	11.48	1.28	20.89	2.63	-3.16	1.03	-1.4	0.94	-4.56	1.43	-6.99	0.3	-4.41	0.79	-11.41	0.85	-0.75	2.11	5.67	1.53	4.92	2.76	5.2	0.23	-7.13	0.6	-1.93	0.55	0.03	0.01	0	0	0.03	0.01	5.23	0.23	-7.13	0.6	-1.89	0.55	4.48	2.13	-1.46
	197	198	ALA	433	2.76	0.74	10.65	1.41	13.41	1.73	-1.7	0.31	-2.4	0.67	-4.1	0.78	2.38	0.13	-6.72	1.03	-4.34	1.02	3.44	0.85	1.53	1.63	4.97	1.79	-0.34	0.06	-2.63	0.5	-2.98	0.51	0.03	0.02	0.04	0.03	0.07	0.03	-0.31	0.07	-2.59	0.5	-2.9	0.51	3.13	0.83	-1.07
	198	199	THR	434	6.6	1.37	10.12	1.56	16.71	2.25	-2.76	0.78	-0.63	0.65	-3.4	1.07	-27.2	1.2	-9.41	1.04	-36.61	1.45	-23.36	1.65	0.07	1.74	-23.3	2.39	2.49	0.43	-5.48	0.82	-2.99	0.74	0.07	0.03	0.11	0.04	0.18	0.05	2.56	0.42	-5.37	0.79	-2.81	0.72	-20.8	1.59	-5.31
	199	200	TYR	435	8.35	1.98	9.47	1.34	17.82	2.53	-3.44	0.89	-1.92	0.67	-5.36	1.24	-18.17	0.78	-3.63	1.15	-21.8	1.33	-13.26	2.21	3.92	1.48	-9.34	2.72	-2.41	0.53	-4.83	0.89	-7.24	1	0.17	0.06	0.04	0.02	0.22	0.07	-2.24	0.52	-4.79	0.88	-7.02	0.97	-15.49	2.13	-0.87
	200	201	GLY	436	0	0	10.43	1.61	10.43	1.61	0	0	-2.27	0.99	-2.27	0.99	0	0	-16.69	2.13	-16.69	2.13	0	0	-8.52	2.43	-8.52	2.43	0	0	1.6	0.95	1.6	0.95	0	0	0.02	0.02	0.02	0.02	0	0	1.62	0.94	1.62	0.94	0	0	-6.91
	201	202	MET	437	7.37	1.72	9.79	1.35	17.17	2.19	-2.66	0.63	-1.57	0.73	-4.23	0.94	-1.8	0.86	-1.56	1.07	-3.36	1.62	2.92	2.02	6.66	1.61	9.58	2.67	1.03	0.61	-7.41	0.66	-6.38	1.02	0.69	0.09	0.04	0.02	0.73	0.08	1.72	0.62	-7.37	0.66	-5.65	1.05	4.64	1.86	-0.71
	202	203	SER	438	3.69	0.87	11.58	1.26	15.27	1.7	-1.19	0.55	-0.35	0.69	-1.54	0.95	-3.93	1.89	4.67	1.26	0.73	2.37	-1.43	1.91	15.9	1.66	14.47	2.73	-0.99	1.28	-6.86	1.07	-7.85	1.63	0.27	0.07	0.05	0.02	0.32	0.08	-0.72	1.25	-6.81	1.06	-7.53	1.6	-2.15	1.14	9.09
	203	204	PRO	439	12.42	1.7	13.16	1.3	25.58	2.31	-4.31	0.64	-2.17	0.91	-6.48	1.12	-10.03	0.97	1.65	3.51	-8.39	2.84	-1.92	2.2	12.64	3.6	10.71	3.59	9.35	0.86	-10.67	2.15	-1.32	1.58	0	0	0	0.01	0	0.01	9.35	0.86	-10.67	2.14	-1.32	1.58	7.43	1.92	1.97
	204	205	TYR	440	9.01	1.94	12.29	1.29	21.3	2.45	-3.73	0.7	-0.86	0.74	-4.59	1.1	-18.03	0.63	5.22	1.95	-12.82	1.77	-12.75	2.09	16.65	2.2	3.9	3.14	-1.69	0.49	-5.75	1.59	-7.44	1.43	0.02	0.01	0.03	0.02	0.05	0.02	-1.67	0.48	-5.73	1.58	-7.39	1.42	-14.41	2.16	10.92
	205	206	PRO	441	12.14	1.31	12.27	1.19	24.41	2.05	-1.58	0.48	-0.53	0.57	-2.11	0.8	-10.37	1.03	7.9	1.48	-2.48	1.09	0.19	1.77	19.64	1.7	19.82	2.25	9.68	1	-16.14	1.26	-6.46	0.85	0.38	0.1	0.14	0.03	0.52	0.11	10.06	0.96	-16	1.25	-5.94	0.84	10.25	1.39	3.63
	206	207	GLY	442	0	0	9.6	1.53	9.6	1.53	0	0	-0.45	0.47	-0.45	0.47	0	0	-5.32	0.76	-5.32	0.76	0	0	3.83	1.47	3.83	1.47	0	0	-7.13	0.47	-7.13	0.47	0	0	0.68	0.02	0.68	0.02	0	0	-6.45	0.46	-6.45	0.46	0	0	-2.62
	207	208	ILE	443	9.24	2.13	9.67	1.36	18.91	2.64	-2.17	1.02	0.94	0.75	-1.23	1.36	-7.69	0.43	-5.14	1.17	-12.83	1.18	-0.63	2.24	5.48	1.71	4.85	2.64	5.37	0.37	-8.12	1.14	-2.75	1.08	0.25	0.06	0.17	0.04	0.41	0.06	5.61	0.35	-7.95	1.13	-2.34	1.07	4.99	2.2	-2.48
	208	209	ASP	444	4.13	1.34	9.65	1.23	13.78	1.87	-0.03	0.98	-0.87	0.72	-0.9	1.24	8.88	3.22	-0.49	1.44	8.39	3.8	12.98	3.22	8.29	1.72	21.27	3.96	-76.52	3.11	-10.11	1.05	-86.64	3.68	0.53	0.03	0.08	0.02	0.61	0.04	-75.99	3.1	-10.04	1.03	-86.03	3.66	-63.01	1.43	-1.75
	209	210	LEU	445	9.05	1.87	11.15	1.24	20.19	2.32	-1.94	1.04	-1.04	0.79	-2.98	1.43	-27.24	0.57	-3.01	0.95	-30.25	1	-20.13	2.21	7.09	1.47	-13.04	2.62	3.44	0.35	-5.46	0.87	-2.01	0.85	0.21	0.08	0.04	0.02	0.25	0.09	3.66	0.38	-5.42	0.86	-1.76	0.8	-16.47	2.2	1.67
	210	211	SER	446	3.6	0.89	9.89	1.43	13.5	1.75	0.45	0.85	0.14	0.78	0.59	1.26	-8.9	1.19	-7.42	1.29	-16.32	1.86	-4.85	1.15	2.61	1.62	-2.24	2.05	1.03	0.65	-7.42	0.9	-6.38	1.21	0.44	0.04	0.19	0.05	0.64	0.06	1.48	0.63	-7.22	0.91	-5.75	1.21	-3.37	1.03	-4.61
	211	212	GLN	447	13.49	2.03	9.7	1.4	23.18	2.67	-2.29	0.74	-0.86	0.88	-3.15	1.23	-67.72	2.62	-4.91	1.2	-72.63	2.67	-56.53	3.02	3.93	1.51	-52.59	3.29	-6.44	1.78	-3.06	0.79	-9.5	1.72	0.61	0.06	0	0	0.61	0.06	-5.83	1.76	-3.06	0.79	-8.89	1.69	-62.36	2.26	0.88
	212	213	VAL	448	6.24	1.49	11.23	1.26	17.47	2.01	-3.11	0.65	-1.07	0.78	-4.18	1.13	-20.38	0.45	-5.98	1.09	-26.36	1.16	-17.25	1.59	4.19	1.35	-13.07	2.06	5.59	0.38	-7.8	0.57	-2.21	0.51	0	0	0	0	0.01	0.01	5.59	0.38	-7.8	0.57	-2.21	0.51	-11.66	1.51	-3.61
	213	214	TYR	449	9.19	1.84	10.76	1.24	19.95	2.09	-2.92	1.01	-1.81	0.73	-4.73	1.24	-18.03	2	-6.75	1.17	-24.78	2.61	-11.76	3.06	2.2	1.53	-9.55	3.46	-2.93	1.78	-5.46	0.86	-8.4	2.15	0.34	0.15	0.01	0.01	0.35	0.15	-2.59	1.7	-5.46	0.86	-8.05	2.08	-14.35	2.04	-3.25
	214	215	GLU	450	6.3	1.73	11.27	1.58	17.57	2.51	-1.29	0.71	-1.22	0.88	-2.52	1.2	34.79	5.9	-1.77	3.08	33.02	7.08	39.8	6.59	8.28	3.51	48.07	7.65	-97.36	5.91	-8	2.09	-105.37	6.78	0.71	0.08	0.03	0.03	0.74	0.09	-96.66	5.86	-7.97	2.08	-104.63	6.73	-56.86	1.79	0.3
	215	216	LEU	451	8.38	1.65	11.27	1.37	19.65	2.32	-2.02	0.81	-1.83	0.8	-3.85	1.33	-28.02	0.37	-1.42	1.07	-29.43	1.06	-21.66	1.85	8.02	1.56	-13.64	2.51	3.83	0.26	-5.91	0.7	-2.08	0.61	0.32	0.07	0.01	0.01	0.32	0.07	4.15	0.28	-5.91	0.7	-1.76	0.6	-17.51	1.84	2.11
	216	217	LEU	452	8.77	1.85	11.39	1.46	20.15	2.58	-3.13	0.96	-1.69	0.96	-4.83	1.35	-28.1	0.53	-6.67	1.31	-34.77	1.54	-22.47	2.05	3.02	1.59	-19.45	2.69	4.1	0.3	-6.31	0.83	-2.21	0.94	0.01	0.01	0	0	0.01	0.01	4.11	0.3	-6.31	0.83	-2.19	0.94	-18.36	2.04	-3.28
	217	218	GLU	453	6.91	2.06	11.01	1.36	17.91	2.65	-1.55	0.82	-0.41	0.68	-1.96	1.07	36.53	6.39	3.59	1.58	40.12	6.32	41.89	6.4	14.19	2.12	56.08	6.59	-98.69	5.96	-12.03	1.25	-110.71	5.99	0.64	0.09	0.17	0.04	0.81	0.09	-98.04	5.97	-11.85	1.26	-109.9	6	-56.16	2.06	2.33
	218	219	LYS	454	11.03	2.15	10.02	1.48	21.05	2.67	-0.53	1	0.62	0.84	0.09	1.42	-54.26	10.12	-7.42	0.81	-61.68	9.98	-43.76	9.98	3.22	1.61	-40.54	9.84	26.69	9.95	-5.31	0.58	21.37	9.72	0.95	0.09	0.24	0.02	1.19	0.09	27.64	9.87	-5.08	0.57	22.56	9.64	-16.12	2.48	-1.86
	219	220	ASP	455	4.77	1.78	10.95	1.61	15.72	2.61	0.09	0.96	-0.17	0.74	-0.08	1.37	11.87	5.18	-3.72	1.62	8.15	5.97	16.73	5.24	7.06	2.18	23.79	6.08	-79.05	4.85	-14.33	1.26	-93.38	5.55	0.58	0.05	0.1	0.02	0.68	0.07	-78.47	4.82	-14.22	1.24	-92.69	5.5	-61.74	1.61	-7.16
	220	221	TYR	456	8.47	1.81	9.28	1.01	17.75	2.27	-2.26	0.65	-1.14	0.91	-3.4	1.1	-16.39	0.66	-0.24	1.1	-16.63	1.21	-10.19	1.88	7.91	1.47	-2.28	2.51	-5.16	0.56	-3.69	0.64	-8.85	0.77	0.56	0.08	0.05	0.01	0.61	0.08	-4.6	0.53	-3.64	0.64	-8.24	0.74	-14.79	1.78	4.26
	221	222	ARG	457	14	2.98	10.17	1.51	24.16	3.37	-3.93	1.4	-1.1	0.63	-5.03	1.62	-244.65	5.04	0.32	0.66	-244.33	5.08	-234.59	4.95	9.39	1.49	-225.2	5.3	53.81	3.85	-7.76	0.54	46.05	3.85	0.39	0.07	0.11	0.02	0.5	0.08	54.2	3.83	-7.65	0.53	46.55	3.83	-180.39	2.77	1.74
	222	223	MET	458	6.68	1.69	9.49	1.21	16.17	2.23	-6.23	0.76	-1.19	0.77	-7.41	1.19	-1.74	0.64	-9.84	0.99	-11.57	1.18	-1.29	2.15	-1.53	1.48	-2.82	2.74	1.65	0.41	-5.59	0.83	-3.94	0.87	0.03	0.02	0.02	0.02	0.05	0.03	1.68	0.4	-5.56	0.82	-3.88	0.86	0.4	1.98	-7.1
	223	224	GLU	459	6.23	1.73	10.04	1.33	16.27	2.4	-0.76	0.48	-0.67	0.75	-1.43	0.95	37.54	2.41	5.53	1.17	43.07	2.51	43.01	2.9	14.91	1.84	57.92	3.43	-100.75	2.52	-8.99	0.81	-109.74	2.7	0.91	0.07	0.04	0.02	0.95	0.07	-99.84	2.51	-8.95	0.81	-108.79	2.69	-56.83	1.69	5.96
	224	225	ARG	460	13.94	2.84	12.13	1.4	26.07	3.31	-4.26	1.05	-0.4	0.57	-4.66	1.24	-212.98	5.09	12.2	1.11	-200.79	5.2	-203.31	5.71	23.93	1.72	-179.38	6.01	26.27	4.56	-9.28	1	16.98	4.57	0.71	0.06	0.12	0.03	0.83	0.06	26.98	4.53	-9.16	1.01	17.82	4.53	-176.33	2.67	14.76
	225	226	PRO	461	12.36	1.62	12.85	1.1	25.21	2.06	-3.73	0.61	-1.32	0.57	-5.05	0.78	-11.17	0.77	-3.28	1.33	-14.44	1.16	-2.53	1.98	8.26	1.64	5.72	2.37	10.38	0.69	-9.9	1.06	0.48	0.85	0.02	0.03	0.07	0.02	0.09	0.05	10.4	0.69	-9.83	1.05	0.57	0.83	7.86	1.76	-1.58
	226	227	GLU	462	6.44	1.87	8.98	1.24	15.42	2.33	0.2	0.58	-0.07	0.62	0.13	0.9	31.67	3.96	4.8	0.99	36.46	3.99	38.3	4.47	13.7	1.56	52.01	4.6	-95.76	3.97	-13.56	0.86	-109.32	4.14	1.03	0.09	0.17	0.04	1.2	0.1	-94.73	3.91	-13.39	0.85	-108.12	4.07	-56.43	2.05	0.31
	227	228	GLY	463	0	0	9.45	1.46	9.45	1.46	0	0	-1.06	0.5	-1.06	0.5	0	0	-6.82	1	-6.82	1	0	0	1.58	1.63	1.58	1.63	0	0	-5.6	0.74	-5.6	0.74	0	0	0.47	0.08	0.47	0.08	0	0	-5.13	0.75	-5.13	0.75	0	0	-3.55
	228	229	CYS	464	3.25	0.93	11.14	1.31	14.39	1.6	-3.63	0.38	0.64	0.88	-2.99	0.94	6.58	0.51	-4.03	1.28	2.56	1.25	6.2	1.11	7.75	1.87	13.96	2.07	-1.39	0.37	1.74	0.71	0.35	0.63	0.02	0.01	0.04	0.02	0.05	0.02	-1.37	0.37	1.78	0.71	0.41	0.63	4.83	1.04	9.53
	229	230	PRO	465	12.19	1.47	13.25	1.11	25.44	2.07	-1.88	0.65	-1.67	0.87	-3.55	0.98	-8.43	1.03	-0.39	1.39	-8.82	1.53	1.89	1.88	11.19	1.64	13.08	2.5	8.06	0.99	-10.79	0.72	-2.73	0.97	0.35	0.07	0.06	0.02	0.41	0.07	8.4	0.98	-10.72	0.72	-2.32	0.96	10.29	1.65	0.47
	230	231	GLU	466	6.32	1.84	11.32	1.47	17.65	2.47	-0.92	0.67	-1.46	0.68	-2.38	0.99	18.64	4.44	2.57	1.96	21.21	5.48	24.05	4.63	12.43	1.98	36.48	5.4	-82.4	4.61	-8.49	1.45	-90.9	5.29	0.83	0.06	0.05	0.02	0.88	0.06	-81.57	4.58	-8.44	1.45	-90.01	5.26	-57.52	1.75	3.99
	231	232	LYS	467	11.58	2.14	11.19	1.51	22.77	2.62	-0.76	0.85	-1.54	0.74	-2.29	1.25	-60.79	14.76	-0.45	1.15	-61.24	14.78	-49.96	14.83	9.2	1.55	-40.76	14.59	31.13	13.35	-6.72	0.85	24.41	13.56	0.95	0.1	0.02	0.02	0.98	0.11	32.09	13.28	-6.7	0.85	25.39	13.48	-17.87	2.63	2.5
	232	233	VAL	468	6.13	1.65	11.16	1.48	17.28	2.3	-2.32	0.71	-1.4	0.87	-3.73	1.25	-20.52	0.52	-10.24	0.91	-30.76	1	-16.72	1.92	-0.49	1.5	-17.21	2.47	5.32	0.39	-7.81	0.5	-2.49	0.51	0.08	0.03	0	0	0.08	0.03	5.4	0.37	-7.81	0.5	-2.41	0.5	-11.32	1.83	-8.3
	233	234	TYR	469	8.34	2.06	10.97	1.38	19.3	2.42	-4.48	0.68	-2.22	0.86	-6.7	1.1	-16.95	1	-12	1.1	-28.95	1.39	-13.1	2.4	-3.25	1.81	-16.34	3	-4.35	0.77	-2.16	0.6	-6.51	0.83	0.33	0.07	0	0	0.33	0.07	-4.02	0.78	-2.16	0.6	-6.18	0.84	-17.12	2.25	-5.41
	234	235	GLU	470	6.37	2.02	11.14	1.37	17.51	2.57	-1.55	0.81	-1.81	0.76	-3.36	1.26	10.61	9.39	-1.69	1.24	8.92	9.61	15.42	9.17	7.64	1.61	23.07	9.36	-73.46	8.9	-8.24	0.94	-81.7	9.11	0.56	0.1	0.03	0.02	0.59	0.1	-72.9	8.82	-8.21	0.94	-81.11	9.03	-57.48	2.05	-0.57
	235	236	LEU	471	8.67	1.89	11.62	1.49	20.29	2.64	-3.05	0.91	-1.29	0.93	-4.35	1.36	-27.93	0.39	-4.07	0.98	-32	1.06	-22.31	2.05	6.25	1.72	-16.06	2.93	4.37	0.22	-5.08	0.51	-0.72	0.54	0.11	0.04	0	0.01	0.12	0.04	4.48	0.22	-5.08	0.51	-0.6	0.55	-17.83	2.03	1.17
	236	237	MET	472	7.06	1.67	11.65	1.31	18.72	2.32	-7.27	0.85	-3.21	0.74	-10.48	1.16	-2.52	0.59	-0.74	1.03	-3.26	1.24	-2.73	1.88	7.71	1.69	4.98	2.58	2.44	0.44	-4.19	0.45	-1.75	0.63	0	0	0	0	0	0	2.44	0.44	-4.19	0.45	-1.75	0.63	-0.29	1.84	3.52
	237	238	ARG	473	13.43	2.82	11.45	1.36	24.88	3.5	-2.67	1.08	-2.31	0.63	-4.97	1.24	-205.23	11.22	-6.02	1.33	-211.24	11.29	-194.47	11.53	3.12	1.64	-191.34	11.86	19.49	9.72	-4.4	0.87	15.08	9.88	0.99	0.1	0.03	0.02	1.02	0.11	20.47	9.64	-4.37	0.86	16.1	9.8	-174	3.26	-1.25
	238	239	ALA	474	2.81	0.87	11.05	1.31	13.87	1.74	-1.37	0.3	-2.64	0.76	-4.01	0.85	2.3	0.11	-13.27	0.92	-10.97	0.94	3.74	0.89	-4.86	1.53	-1.12	1.88	-0.16	0.06	-0.32	0.55	-0.47	0.55	0.18	0.03	0.04	0.02	0.22	0.03	0.02	0.07	-0.28	0.55	-0.26	0.55	3.76	0.88	-5.14
	239	240	CYS	475	3.31	0.94	10.82	1.12	14.13	1.46	-3.81	0.68	-3.43	0.75	-7.24	1.06	5.76	0.55	-9.71	0.92	-3.95	1.04	5.26	1.12	-2.32	1.42	2.94	1.83	-1.61	0.19	1.33	0.44	-0.29	0.51	0	0	0	0	0	0	-1.61	0.19	1.33	0.44	-0.29	0.51	3.65	1.1	-0.99
	240	241	TRP	476	11.58	2.29	10.59	1.4	22.17	2.68	-9.78	0.71	-1.43	0.92	-11.21	1.18	7.2	0.5	-12.39	1.75	-5.18	1.87	9.01	2.38	-3.23	2	5.77	2.93	0.59	0.38	-0.74	0.56	-0.15	0.69	0.02	0.01	0	0	0.02	0.01	0.61	0.38	-0.74	0.56	-0.12	0.69	9.62	2.41	-3.97
	241	242	GLN	477	13.95	1.96	10.09	1.18	24.04	2.34	-3.01	0.76	-1.57	0.87	-4.58	1.26	-72.5	3.74	-8.32	1.21	-80.83	3.46	-61.56	3.56	0.2	1.54	-61.37	3.51	-3.24	2.43	-1.57	0.49	-4.81	2.37	0.51	0.04	0	0	0.52	0.04	-2.72	2.42	-1.57	0.49	-4.29	2.36	-64.28	1.9	-1.37
	242	243	TRP	478	11.27	2.33	11.72	1.28	22.99	2.76	-4.36	0.7	-2.18	0.61	-6.54	0.84	10.42	0.75	-6.57	1.38	3.85	1.48	17.33	2.58	2.97	1.73	20.29	3.11	-5.07	0.76	-3.7	0.73	-8.77	1.05	0.68	0.08	0.04	0.01	0.72	0.08	-4.39	0.72	-3.66	0.72	-8.04	1.01	12.94	2.55	-0.69
	243	244	ASN	479	11.32	1.92	11.9	1.42	23.21	2.57	-1.85	0.6	-0.59	0.66	-2.44	1.02	-81.62	2.09	2.36	1.52	-79.26	2.93	-72.15	2.67	13.66	2.03	-58.49	3.81	-5.01	1.74	-4.18	0.76	-9.19	2.11	0.56	0.03	0.05	0.01	0.61	0.03	-4.45	1.73	-4.13	0.76	-8.58	2.1	-76.59	1.74	9.53
	244	245	PRO	480	12.08	1.41	13.94	1.23	26.02	1.95	-2.82	0.53	-2.69	0.72	-5.51	0.91	-5.51	0.98	-2.54	1.71	-8.05	1.55	3.75	1.82	8.71	2.17	12.46	2.65	5.11	0.89	-8.17	0.99	-3.05	0.87	0.28	0.05	0	0	0.29	0.05	5.4	0.91	-8.17	0.99	-2.77	0.88	9.15	1.57	0.54
	245	246	SER	481	3.65	0.98	10.19	1.27	13.83	1.73	-0.66	0.38	-0.26	0.8	-0.92	0.95	-2.58	0.8	-6.71	1.24	-9.29	1.61	0.4	1.26	3.22	1.7	3.62	2.38	-2.42	0.55	-8.46	1.09	-10.88	1.28	0.51	0.03	0.21	0.04	0.72	0.04	-1.91	0.55	-8.25	1.07	-10.16	1.26	-1.51	1.18	-5.03
	246	247	ASP	482	4.44	1.32	10.41	1.59	14.85	1.95	-1.16	0.72	-0.69	0.75	-1.85	1.05	19.84	5.96	9.03	1.09	28.87	6.5	23.12	6.06	18.75	1.73	41.87	6.52	-85.58	5.76	-15.52	0.96	-101.1	6.19	0.49	0.05	0.15	0.03	0.64	0.05	-85.09	5.73	-15.37	0.95	-100.45	6.16	-61.97	1.23	3.39
	247	248	ARG	483	12.63	2.28	11.36	1.5	23.99	3	-7.71	1.46	-0.21	0.96	-7.91	1.72	-239.17	3.94	2.64	2.1	-236.53	4.28	-234.24	4.06	13.79	2.18	-220.45	4.52	45.79	2.99	-2.03	1.22	43.77	3.2	0	0	0.02	0.02	0.02	0.02	45.79	2.99	-2.01	1.21	43.79	3.19	-188.45	2.6	11.79
	248	249	PRO	484	12.24	1.57	12.78	1.23	25.02	2.22	-3.03	0.67	-2.11	0.64	-5.14	0.9	-13.5	0.86	0.31	1.5	-13.18	1.4	-4.29	1.85	10.98	1.76	6.7	2.46	12.91	0.78	-11.03	1.12	1.88	1.02	0.14	0.03	0.04	0.02	0.18	0.04	13.05	0.78	-10.98	1.12	2.06	1	8.76	1.64	0
	249	250	SER	485	3.44	1.06	9.9	1.23	13.34	1.89	-0.9	0.83	-1.69	0.9	-2.59	1.25	-7.8	2.42	-9.3	1.51	-17.1	3.29	-5.27	2.24	-1.09	1.9	-6.36	3.34	1.38	1.37	-4.33	0.69	-2.95	1.78	0.18	0.03	0	0.01	0.18	0.04	1.56	1.35	-4.32	0.69	-2.77	1.76	-3.71	1.4	-5.41
	250	251	PHE	486	8.62	2.05	11.15	1.52	19.77	2.46	-5.23	0.77	-2.36	0.75	-7.6	1.09	-0.36	0.27	-9.53	1.24	-9.89	1.28	3.03	2.34	-0.75	1.76	2.28	2.86	0.92	0.19	-2.84	0.72	-1.92	0.75	0	0.01	0	0	0	0.01	0.92	0.19	-2.84	0.72	-1.92	0.75	3.95	2.31	-3.58
	251	252	ALA	487	2.7	0.86	11.18	1.32	13.88	1.66	-1	0.2	-2.2	0.72	-3.21	0.71	2.38	0.16	-9.17	1.34	-6.79	1.36	4.08	0.88	-0.19	1.64	3.89	1.97	-0.44	0.1	-2.42	0.86	-2.86	0.92	0.3	0.03	0.03	0.02	0.34	0.04	-0.14	0.1	-2.39	0.86	-2.52	0.91	3.94	0.88	-2.58
	252	253	GLU	488	6.15	1.67	11.04	1.29	17.19	2.24	-1.01	1	-1.68	0.66	-2.7	1.26	29.21	7.04	2.19	1.21	31.4	7.21	34.35	7.12	11.55	1.79	45.9	7.69	-92.36	6.39	-11.9	0.9	-104.26	6.68	0.68	0.06	0.04	0.02	0.72	0.06	-91.68	6.35	-11.86	0.89	-103.54	6.65	-57.33	1.99	-0.31
	253	254	ILE	489	10.13	1.98	11.55	1.29	21.68	2.38	-3.36	0.91	-1.14	0.85	-4.5	1.43	-7.7	0.34	-3.02	1.05	-10.72	1.12	-0.92	2	7.39	1.65	6.46	2.74	6.1	0.3	-7.09	0.58	-0.98	0.59	0.02	0.01	0	0	0.02	0.01	6.12	0.3	-7.09	0.58	-0.97	0.59	5.2	2.03	0.3
	254	255	HIS	490	24.76	1.65	11.09	1.51	35.85	2.24	-7.13	0.78	-2.07	0.91	-9.19	1.19	-6.98	2.78	-9.78	1.56	-16.76	3.38	10.66	2.95	-0.76	1.55	9.9	3.32	-6.39	2.09	-3.95	0.96	-10.34	2.35	0.2	0.06	0	0	0.2	0.06	-6.19	2.09	-3.95	0.96	-10.14	2.34	4.47	1.79	-4.71
	255	256	GLN	491	13.69	1.93	11.02	1.19	24.71	2.51	-1.05	0.67	-0.92	1.01	-1.97	1.33	-64.85	1.67	-9.83	1.83	-74.68	2.49	-52.21	2.1	0.28	1.89	-51.94	3.14	-9.41	1.22	-3.81	0.87	-13.22	1.34	0.93	0.05	0.03	0.02	0.97	0.06	-8.47	1.21	-3.78	0.86	-12.25	1.32	-60.69	1.78	-3.5
	256	257	ALA	492	2.87	1.01	11.13	1.33	14	1.75	-1.29	0.31	-2.28	0.79	-3.57	0.85	2.32	0.13	-9.09	1.21	-6.77	1.23	3.9	1.09	-0.24	1.59	3.66	2.03	-0.31	0.06	-0.45	0.77	-0.76	0.78	0.16	0.04	0.06	0.02	0.22	0.03	-0.15	0.07	-0.4	0.76	-0.55	0.78	3.76	1.08	-0.64
	257	258	PHE	493	8.84	2.11	12.15	1.44	20.99	2.52	-4.87	0.75	-2.39	0.84	-7.26	1.17	-0.32	0.39	-10.61	1.39	-10.93	1.44	3.66	2.45	-0.86	1.83	2.8	3.05	0.8	0.21	-2.16	0.81	-1.37	0.87	0	0	0	0	0	0	0.8	0.21	-2.16	0.81	-1.36	0.87	4.46	2.43	-3.02
	258	259	GLU	494	6.57	1.82	10.89	1.36	17.47	2.4	-2.22	0.62	-1.39	0.76	-3.61	1.1	55.54	4.11	0.57	2	56.11	4.73	59.9	4.55	10.07	2.28	69.97	5.35	-116.61	4.37	-13.36	1.39	-129.97	4.7	0.61	0.09	0.04	0.03	0.64	0.1	-116	4.38	-13.33	1.38	-129.33	4.71	-56.11	1.85	-3.26
	259	260	THR	495	6.61	1.76	10.93	1.37	17.53	2.21	-0.21	0.79	-0.3	0.91	-0.51	1.29	-26.92	1.95	-5.87	2.24	-32.79	2.64	-20.52	2.15	4.75	2.58	-15.77	2.87	2.05	1.23	-8.51	2.01	-6.46	2.11	0.57	0.05	0.08	0.05	0.65	0.08	2.62	1.22	-8.43	2	-5.81	2.08	-17.9	1.58	-3.68
	260	261	MET	496	7.38	1.87	10.69	1.41	18.07	2.31	-5.03	0.75	-0.63	0.71	-5.66	1.07	-4.49	0.86	-3.05	1.72	-7.54	1.63	-2.14	2.23	7.01	2.22	4.87	2.76	4.03	0.78	-7.85	1.58	-3.83	1.48	0.16	0.06	0.19	0.04	0.35	0.07	4.19	0.76	-7.66	1.57	-3.48	1.45	2.05	1.98	-0.65
	261	262	PHE	497	8.12	2.1	10.79	1.39	18.91	2.48	-0.58	1.07	-0.59	0.84	-1.17	1.58	0.67	0.57	0.5	1.46	1.18	1.46	8.21	2.22	10.71	1.77	18.92	2.94	-1.07	0.51	-6.07	0.96	-7.15	1.13	0.56	0.15	0.13	0.05	0.69	0.16	-0.51	0.44	-5.95	0.97	-6.46	1.11	7.7	2.22	4.76
	262	263	GLN	498	14.06	2.38	6.69	1.22	20.74	2.99	-1.26	0.78	0.34	0.52	-0.92	0.95	9.24	10.53	-9.32	3.75	-0.09	7.16	22.04	10.81	-2.3	4.13	19.74	7.57	-211.58	9.6	71.03	3.36	-140.55	6.49	1.39	0.08	0.09	0.02	1.48	0.08	-210.19	9.63	71.12	3.35	-139.06	6.52	-188.15	2.47	68.83
	263	264	LIG	499	25.27	3.39	0	0	25.27	3.39	-9.87	1.88	0	0	-9.87	1.88	-71.29	4.99	0	0	-71.29	4.99	-55.89	6.02	0	0	-55.89	6.02	8.51	4.54	0	0	8.51	4.54	0.07	0.03	0	0	0.07	0.03	8.58	4.53	0	0	8.58	4.53	-47.31	3.72	0
=>>	RECEPTOR
	Number	Residue	Residue Name	Residue ID	SINT		BINT		TINT		SVDW		BVDW		TVDW		SELE		BELE		TELE		SGAS		BGAS		TGAS		SGB		BGB		TGB		SGBSUR		BGBSUR		TGBSUR		SGBSOL		BGBSOL		TGBSOL		SGBTOT		BGBTOT
	0	1	TRP	235	12.38	2.27	3.77	0.86	16.15	2.69	0.69	0.84	-1.03	0.45	-0.33	1.01	-29.51	5.88	-27.9	1.34	-57.42	6.58	-16.44	6.53	-25.16	1.58	-41.6	7.31	-31.11	5.79	-3.46	0.88	-34.57	6.3	1.79	0.14	0	0.01	1.79	0.14	-29.33	5.78	-3.45	0.88	-32.78	6.28	-45.77	2.64	-28.61
	1	2	GLU	236	6.03	1.65	9.21	1.34	15.24	2.36	-1.33	0.59	-0.39	0.69	-1.72	0.89	4.67	4.74	-2.48	1.31	2.18	5.33	9.37	5.17	6.34	1.89	15.7	5.95	-66.99	4.72	-4.25	1.2	-71.24	5.18	0.68	0.08	0.19	0.03	0.87	0.09	-66.31	4.68	-4.06	1.19	-70.37	5.15	-56.94	1.61	2.27
	2	3	MET	237	6.88	1.95	9.7	1.09	16.59	2.38	-6.21	0.82	-0.54	0.87	-6.75	1.21	-0.77	0.45	-7.88	1.36	-8.65	1.46	-0.1	2.12	1.29	1.94	1.18	3.14	0.7	0.39	-3.79	1	-3.09	1.04	0.05	0.03	0.08	0.02	0.13	0.04	0.76	0.38	-3.72	0.99	-2.96	1.04	0.65	2.15	-2.43
	3	4	GLU	238	6.6	1.99	9.71	1.13	16.32	2.41	-0.36	1.07	-0.86	0.89	-1.22	1.5	-14.65	7.86	2.82	1.27	-11.83	8.1	-8.4	7.63	11.67	1.53	3.27	8.16	-50.87	6.58	-5.33	0.85	-56.2	6.92	0.6	0.07	0.03	0.01	0.63	0.07	-50.27	6.55	-5.3	0.85	-55.57	6.89	-58.67	1.99	6.37
	4	5	ARG	239	13.45	3	10.91	1.41	24.36	3.45	-3.59	1.31	-1.67	0.68	-5.26	1.45	-203.72	7.4	-4.37	0.97	-208.08	7.44	-193.86	7.52	4.87	1.5	-188.99	7.79	15.71	5.98	-5.14	0.76	10.57	5.92	0.5	0.11	0.08	0.02	0.58	0.11	16.2	5.93	-5.06	0.75	11.14	5.87	-177.65	3.5	-0.19
	5	6	THR	240	6.37	1.28	10.01	1.41	16.38	1.94	-0.26	0.46	0.98	0.97	0.72	1.25	-20.9	0.96	-22.2	3.43	-43.1	3.36	-14.79	1.51	-11.21	3.1	-26	3.4	-3.67	0.65	-0.52	2.62	-4.19	2.43	0.7	0.05	0.1	0.04	0.8	0.07	-2.97	0.66	-0.43	2.58	-3.4	2.39	-17.76	1.47	-11.63
	6	7	ASP	241	4.98	1.7	10.2	1.53	15.18	2.42	-2.24	1.01	-0.77	0.94	-3.02	1.44	-28.93	11.73	-8.64	2	-37.57	11.89	-26.19	11.17	0.79	2.64	-25.4	11.47	-33.17	10.51	-3.35	1.41	-36.52	10.68	0.2	0.08	0.02	0.02	0.22	0.08	-32.97	10.43	-3.33	1.4	-36.3	10.61	-59.16	2.1	-2.54
	7	8	ILE	242	9.97	1.88	10.23	1.32	20.2	2.58	-3.79	1.04	-0.55	0.8	-4.34	1.49	-4.16	0.37	-5.83	1.35	-9.99	1.2	2.01	1.97	3.86	1.99	5.87	3.12	2.21	0.33	-4.95	1.16	-2.74	1	0.01	0.01	0.05	0.02	0.06	0.02	2.21	0.33	-4.9	1.17	-2.69	1.01	4.23	1.95	-1.04
	8	9	THR	243	6.57	1.42	10.6	1.4	17.17	2.11	-1.06	0.68	-0.71	0.97	-1.76	1.24	-22.18	2.18	-12.13	1.4	-34.31	2.63	-16.67	2.49	-2.23	1.85	-18.9	2.96	-1.52	1.71	-2.79	0.74	-4.31	1.75	0.41	0.07	0.03	0.01	0.44	0.07	-1.11	1.68	-2.76	0.74	-3.87	1.72	-17.78	1.49	-4.99
	9	10	MET	244	7.56	1.87	9.9	1.1	17.46	2.3	-4.81	0.66	-0.75	0.62	-5.56	0.98	0.72	0.61	1.74	0.75	2.46	0.83	3.47	1.83	10.89	1.31	14.36	2.32	-0.87	0.46	-4.65	0.76	-5.52	0.7	0.26	0.06	0.19	0.03	0.45	0.06	-0.61	0.46	-4.46	0.75	-5.07	0.7	2.87	1.81	6.43
	10	11	LYS	245	10.96	2.27	11.84	1.23	22.8	2.71	-1.18	1.07	-0.09	0.71	-1.27	1.29	-19.93	10.86	-4.24	1.01	-24.18	10.54	-10.15	11.05	7.5	1.31	-2.65	10.59	-6.88	10.17	-4.31	0.59	-11.19	9.92	0.94	0.17	0.27	0.03	1.21	0.17	-5.94	10.12	-4.04	0.58	-9.98	9.88	-16.09	2.58	3.46
	11	12	HIS	246	24.91	1.54	9.76	1.21	34.66	1.94	-2.45	0.69	-0.97	0.75	-3.41	0.99	-11.95	2.32	-7.66	1.09	-19.61	3.06	10.51	2.89	1.13	1.53	11.64	3.61	-4.69	2.02	-2.96	0.72	-7.65	2.35	0.76	0.07	0.05	0.02	0.81	0.07	-3.93	1.99	-2.91	0.72	-6.84	2.33	6.59	1.67	-1.78
	12	13	LYS	247	11.34	2.33	10.47	1.1	21.81	2.63	-2.86	0.9	-1.79	0.95	-4.65	1.29	-36.49	13.6	-3.88	1.62	-40.37	13.68	-28.01	13.96	4.8	1.93	-23.21	14.13	8.05	12.29	-3.18	1.16	4.88	12.28	0.52	0.1	0.01	0.02	0.53	0.1	8.57	12.21	-3.17	1.16	5.41	12.19	-19.43	3.09	1.63
	13	14	LEU	248	8.75	1.82	9.41	1.15	18.16	2.31	-2.86	0.93	-1.86	0.92	-4.72	1.33	-27.32	0.39	-9.6	1.47	-36.92	1.5	-21.43	1.9	-2.05	1.96	-23.48	2.92	3.67	0.31	-2.69	0.71	0.97	0.69	0.17	0.04	0	0	0.17	0.04	3.83	0.3	-2.69	0.71	1.14	0.69	-17.6	1.91	-4.74
	14	15	GLY	249	0	0	8.67	1.35	8.67	1.35	0	0	-1.57	0.68	-1.57	0.68	0	0	-11.01	1.89	-11.01	1.89	0	0	-3.91	1.99	-3.91	1.99	0	0	-2.73	1.33	-2.73	1.33	0	0	0.28	0.04	0.28	0.04	0	0	-2.45	1.3	-2.45	1.3	0	0	-6.36
	15	16	GLY	250	0	0	8.5	1.51	8.5	1.51	0	0	-0.94	0.55	-0.94	0.55	0	0	-7.92	1.86	-7.92	1.86	0	0	-0.36	2.12	-0.36	2.12	0	0	-4.85	1.67	-4.85	1.67	0	0	0.45	0.08	0.45	0.08	0	0	-4.4	1.64	-4.4	1.64	0	0	-4.77
	16	17	GLY	251	0	0	9.69	1.71	9.69	1.71	0	0	-1.34	0.77	-1.34	0.77	0	0	-9.02	2.29	-9.02	2.29	0	0	-0.67	2.82	-0.67	2.82	0	0	-2.77	1.84	-2.77	1.84	0	0	0.22	0.05	0.22	0.05	0	0	-2.56	1.81	-2.56	1.81	0	0	-3.23
	17	18	GLN	252	14.04	1.99	10.19	1.57	24.23	2.72	-2.29	0.75	-0.53	0.62	-2.82	1.06	-66.57	1.7	-4.79	1.58	-71.35	2.12	-54.82	2.45	4.87	2.02	-49.95	3.26	-7.84	1.37	-5.13	0.97	-12.97	1.65	0.63	0.07	0.13	0.04	0.76	0.09	-7.2	1.35	-5	0.96	-12.2	1.6	-62.02	1.9	-0.13
	18	19	TYR	253	8.1	2.05	8.64	1.24	16.74	2.51	-3.96	0.8	-0.67	0.69	-4.63	1.17	-18.16	0.81	-2.79	1.06	-20.95	1.29	-14.02	2.28	5.18	1.64	-8.84	2.88	-2.11	0.6	-5.41	0.67	-7.52	0.85	0.1	0.04	0.03	0.02	0.13	0.04	-2.01	0.58	-5.38	0.67	-7.38	0.83	-16.02	2.25	-0.2
	19	20	GLY	254	0	0	8.73	1.53	8.73	1.53	0	0	-1.68	0.74	-1.68	0.74	0	0	-10.7	1.57	-10.7	1.57	0	0	-3.64	2.02	-3.64	2.02	0	0	-2.28	1.14	-2.28	1.14	0	0	0.14	0.04	0.14	0.04	0	0	-2.14	1.12	-2.14	1.12	0	0	-5.78
	20	21	GLU	255	6.49	1.88	10.87	1.46	17.36	2.32	-0.52	0.82	-0.98	0.86	-1.5	1.42	-11.7	10.18	-4.4	2.26	-16.1	10.11	-5.73	10.57	5.49	2.45	-0.24	10.27	-51.17	9.75	-6.56	1.07	-57.73	9.83	0.66	0.11	0.05	0.02	0.71	0.12	-50.51	9.7	-6.51	1.06	-57.02	9.78	-56.24	1.77	-1.02
	21	22	VAL	256	5.99	1.56	10.27	1.31	16.26	2.16	-2.27	0.7	-1.16	0.97	-3.43	1.29	-19.89	0.55	-9.68	1.08	-29.57	1.01	-16.18	1.74	-0.57	1.65	-16.75	2.34	4.69	0.46	-4.74	0.73	-0.05	0.52	0.13	0.03	0	0	0.13	0.03	4.82	0.46	-4.74	0.73	0.07	0.51	-11.36	1.69	-5.31
	22	23	TYR	257	8.25	1.87	10.71	1.38	18.96	2.34	-3.74	0.74	-2.47	0.94	-6.21	1.15	-16.36	1.13	-10.61	1.06	-26.97	1.71	-11.85	2.31	-2.37	1.44	-14.22	2.56	-4.86	0.92	-2.93	0.47	-7.79	1.04	0.41	0.05	0	0	0.41	0.05	-4.45	0.92	-2.93	0.47	-7.38	1.04	-16.3	2.1	-5.3
	23	24	GLU	258	6.14	1.66	9.52	1.34	15.66	2.44	-4.09	0.75	-1.9	0.92	-5.99	1.3	14.58	8.26	-8.73	1.05	5.85	8.17	16.63	8.42	-1.12	1.46	15.51	8.67	-74.41	8.37	-2.8	0.49	-77.2	8.34	0.26	0.08	0	0	0.26	0.08	-74.14	8.3	-2.8	0.49	-76.94	8.27	-57.51	1.71	-3.92
	24	25	GLY	259	0	0	8.3	1.44	8.3	1.44	0	0	-3.16	0.86	-3.16	0.86	0	0	-6.73	1.13	-6.73	1.13	0	0	-1.6	1.65	-1.6	1.65	0	0	-3.88	0.91	-3.88	0.91	0	0	0.02	0.01	0.02	0.01	0	0	-3.87	0.9	-3.87	0.9	0	0	-5.46
	25	26	VAL	260	6.42	1.91	10	1.31	16.43	2.37	-1.95	0.73	-1.53	0.97	-3.47	1.44	-17.05	0.7	-11.8	1.44	-28.85	1.44	-12.57	1.93	-3.33	1.79	-15.9	2.6	2.12	0.55	-2.22	0.89	-0.11	0.8	0.3	0.07	0	0	0.3	0.07	2.41	0.6	-2.22	0.88	0.19	0.81	-10.16	1.94	-5.55
	26	27	TRP	261	11.46	2.16	11.38	1.18	22.84	2.53	-6.37	1	-3.1	0.84	-9.47	1.39	4.51	2.19	-4.83	1.43	-0.32	2.52	9.6	2.75	3.45	1.77	13.05	3.24	-0.54	1.13	-1.27	0.59	-1.82	1.37	0.28	0.08	0	0	0.28	0.08	-0.26	1.13	-1.27	0.59	-1.53	1.35	9.34	2.35	2.18
	27	28	LYS	262	11.03	2.37	12.58	1.56	23.61	2.78	-1.96	1.01	-1.12	0.67	-3.08	1.32	-9.49	7.61	1.16	1.6	-8.32	8.42	-0.41	7.86	12.62	2.09	12.2	8.98	-17.32	7.47	-4.64	0.97	-21.96	7.78	0.77	0.11	0.13	0.03	0.91	0.11	-16.55	7.39	-4.5	0.96	-21.05	7.7	-16.96	2.64	8.12
	28	29	LYS	263	10.76	2.38	11.2	1.4	21.96	2.88	-1.32	1.21	-0.33	0.69	-1.65	1.53	-13.93	10.16	-7.72	1.44	-21.65	9.57	-4.49	9.55	3.14	1.96	-1.35	8.91	-14.18	9.04	-5.46	1.06	-19.64	8.42	0.84	0.07	0.25	0.03	1.08	0.07	-13.34	9.04	-5.21	1.05	-18.56	8.42	-17.84	2.6	-2.07
	29	30	TYR	264	8.67	2.22	9.41	1.32	18.08	2.9	0.46	0.86	0.29	0.69	0.75	1.11	-17.47	0.99	-8.15	0.84	-25.62	1.44	-8.34	2.79	1.55	1.43	-6.79	3.53	-5.21	0.91	-6.36	0.62	-11.56	1.24	0.93	0.09	0.19	0.02	1.13	0.1	-4.27	0.85	-6.16	0.61	-10.43	1.16	-12.61	2.49	-4.61
	30	31	SER	265	3.33	1	10.57	1.4	13.9	1.76	-0.14	0.43	-0.15	0.64	-0.29	0.87	-2.75	1.11	-3.73	1.44	-6.48	1.97	0.44	1.62	6.69	1.89	7.13	2.59	-2.86	0.99	-7.42	1.02	-10.28	1.41	0.55	0.03	0.14	0.03	0.68	0.04	-2.32	0.99	-7.28	1.01	-9.6	1.4	-1.87	1.12	-0.59
	31	32	LEU	266	9.08	2.22	10.51	1.08	19.59	2.57	-1.02	0.74	-0.97	0.82	-1.99	1.08	-26	0.38	-6.94	0.93	-32.94	1.02	-17.94	2.3	2.6	1.24	-15.34	2.61	2.02	0.24	-2.37	0.54	-0.35	0.53	0.55	0.06	0.02	0.01	0.57	0.06	2.57	0.24	-2.34	0.54	0.22	0.54	-15.37	2.29	0.26
	32	33	THR	267	6.71	1.54	10.12	1.14	16.84	2.1	-1.46	0.58	-1.37	0.74	-2.83	1.01	-22.76	1.59	-7.91	0.89	-30.67	2.19	-17.51	2.1	0.84	1.45	-16.67	2.7	-0.95	1.2	-5.42	0.69	-6.37	1.67	0.45	0.07	0.04	0.02	0.49	0.07	-0.5	1.2	-5.38	0.68	-5.88	1.67	-18	1.71	-4.55
	33	34	VAL	268	5.95	1.58	9.91	1.28	15.86	2.17	-3.73	0.77	-1.69	0.88	-5.42	1.35	-19.86	0.46	-10.4	1.1	-30.26	1.23	-17.64	1.79	-2.18	1.5	-19.82	2.53	4.34	0.34	-4.6	0.59	-0.26	0.49	0	0	0	0	0	0	4.34	0.34	-4.6	0.59	-0.26	0.49	-13.3	1.72	-6.78
	34	35	ALA	269	2.53	0.76	9.85	1.34	12.38	1.66	-1.78	0.2	-2.15	0.91	-3.94	0.95	2.14	0.12	-7.31	1.13	-5.18	1.14	2.88	0.82	0.39	1.74	3.27	1.99	-0.06	0.06	-0.52	0.53	-0.58	0.54	0.08	0.02	0	0	0.08	0.02	0.02	0.06	-0.52	0.53	-0.49	0.54	2.9	0.81	-0.13
	35	36	VAL	270	6.09	1.7	10.81	1.39	16.9	2.35	-3.34	0.64	-0.69	1.02	-4.03	1.35	-19.64	0.49	-3.71	1.2	-23.34	1.19	-16.89	1.78	6.42	1.52	-10.47	2.46	4.01	0.36	-5.03	0.67	-1.03	0.53	0	0	0.01	0.01	0.01	0.01	4.01	0.36	-5.03	0.66	-1.02	0.53	-12.88	1.7	1.39
	36	37	LYS	271	10.61	2.32	10.46	1.08	21.07	2.6	-2.2	0.85	-2.29	0.7	-4.49	1.1	-63.84	9.62	-8.31	1	-72.16	9.83	-55.44	9.95	-0.14	1.51	-55.58	10.41	35.44	7.98	-1.54	0.43	33.9	8.14	0.49	0.07	0.01	0.01	0.49	0.07	35.93	7.99	-1.53	0.43	34.39	8.14	-19.51	3.27	-1.67
	37	38	THR	272	6.26	1.48	10.02	1.28	16.28	2.1	-2.27	0.75	-1.24	0.71	-3.51	1.12	-23.93	1.93	-10.93	0.94	-34.86	2.4	-19.94	2.46	-2.15	1.47	-22.09	2.94	-0.21	1.31	-5.44	0.67	-5.65	1.65	0.11	0.04	0.05	0.03	0.16	0.06	-0.09	1.28	-5.39	0.67	-5.48	1.61	-20.03	1.8	-7.54
	38	39	LEU	273	8.88	2.09	10.25	1.28	19.13	2.45	-2.1	0.96	-1.63	0.66	-3.74	1.21	-26.57	0.44	3.92	1.22	-22.65	1.2	-19.79	2.2	12.54	1.59	-7.26	2.69	2.87	0.32	-4.83	0.75	-1.96	0.78	0.25	0.04	0.03	0.01	0.27	0.05	3.12	0.31	-4.81	0.75	-1.69	0.77	-16.68	2.23	7.73
	39	40	LYS	274	11.25	2.39	17.63	1.56	28.88	3.08	-0.64	0.78	-1.79	0.76	-2.43	1.23	-13.92	8.76	-9.06	1.01	-22.98	8.83	-3.32	8.32	6.79	1.37	3.47	8.34	-13.34	8.17	-4.03	0.87	-17.37	8.1	1.04	0.11	0.08	0.02	1.12	0.11	-12.3	8.09	-3.95	0.86	-16.24	8.02	-15.61	2.64	2.84
	40	41	ASP	276	3.93	1.2	14.07	1.4	18	1.88	-3.09	0.58	-1.04	0.83	-4.13	1.14	18.25	3.66	-6.66	2.2	11.58	5.4	19.08	3.78	6.37	2.53	25.46	5.68	-79.88	3.91	-9.47	2.11	-89.36	5.53	0.27	0.05	0.13	0.03	0.4	0.05	-79.62	3.9	-9.34	2.09	-88.96	5.51	-60.53	1.37	-2.97
	41	42	THR	277	6.29	1.37	11	1.51	17.28	2.17	-0.35	0.46	0.7	0.68	0.35	0.94	-22.2	1.05	-7.05	1.53	-29.25	1.65	-16.26	1.72	4.64	1.91	-11.62	2.41	-2.29	0.94	-7.81	1.16	-10.1	1.24	0.6	0.05	0.26	0.03	0.85	0.06	-1.7	0.95	-7.55	1.16	-9.25	1.25	-17.96	1.52	-2.91
	42	43	MET	278	6.83	1.6	11.14	1.48	17.97	2.42	-0.58	0.57	0.22	0.55	-0.35	0.92	-1.58	1.03	-1.55	1.33	-3.13	1.89	4.67	1.97	9.82	2.15	14.49	3.14	0.46	0.99	-9.52	1.11	-9.06	1.7	1.09	0.06	0.23	0.04	1.32	0.06	1.55	0.98	-9.29	1.11	-7.75	1.69	6.22	1.7	0.52
	43	44	GLU	279	5.83	1.69	9.7	1.17	15.53	2.35	-1.36	0.83	-0.41	0.66	-1.78	1.07	32.26	5.89	-0.33	2.21	31.93	7.35	36.72	6.45	8.96	2.53	45.68	8.06	-94.07	6.21	-7.87	1.88	-101.94	7.49	0.61	0.12	0.08	0.02	0.69	0.13	-93.46	6.18	-7.79	1.87	-101.25	7.44	-56.74	1.81	1.17
	44	45	VAL	280	6.41	1.57	10.78	1.4	17.2	2.24	-1.51	0.75	0.14	1.06	-1.37	1.42	-20.7	0.74	-11.82	2.11	-32.52	2.62	-15.8	1.9	-0.9	2.21	-16.7	3.18	5.92	0.6	-4.39	1.17	1.53	1.6	0.3	0.05	0.01	0.01	0.31	0.05	6.22	0.59	-4.38	1.16	1.84	1.59	-9.58	1.75	-5.28
	45	46	GLU	281	6.21	1.56	11.28	1.21	17.49	1.99	-1	0.72	-0.69	1.1	-1.69	1.32	26.71	9.7	-10.99	1.56	15.72	9.63	31.93	9.59	-0.41	1.92	31.52	9.76	-90.38	9.37	-4.04	0.98	-94.43	9.4	0.73	0.09	0.01	0.02	0.74	0.1	-89.66	9.33	-4.03	0.98	-93.69	9.36	-57.73	1.76	-4.44
	46	47	GLU	282	6.37	2	10.32	1.17	16.69	2.36	-0.38	1.07	-1.01	0.8	-1.39	1.32	1.58	12.66	-2.2	1.5	-0.62	13.09	7.57	12.49	7.11	1.59	14.68	12.82	-65.82	11.66	-8.53	1.21	-74.35	12.03	0.63	0.13	0.04	0.02	0.67	0.13	-65.18	11.57	-8.5	1.2	-73.68	11.93	-57.61	2.18	-1.39
	47	48	PHE	283	8.23	1.88	10.93	1.22	19.16	2.28	-4.63	0.74	-2.15	0.75	-6.78	0.99	1.45	0.34	-6.65	1	-5.2	1.09	5.05	2.31	2.14	1.46	7.19	2.8	-0.65	0.29	-1.62	0.61	-2.28	0.73	0.04	0.02	0.01	0.01	0.05	0.02	-0.61	0.29	-1.61	0.61	-2.23	0.73	4.44	2.31	0.52
	48	49	LEU	284	9.09	2.02	11.29	1.3	20.38	2.41	-1.06	0.99	-1.41	0.76	-2.47	1.3	-26.4	0.44	0.2	1.2	-26.2	1.2	-18.37	2.23	10.07	1.74	-8.3	2.75	2.83	0.31	-3.39	0.93	-0.56	0.89	0.52	0.06	0.05	0.02	0.57	0.06	3.36	0.3	-3.34	0.91	0.01	0.87	-15.01	2.25	6.73
	49	50	LYS	285	10.89	2.1	11.46	1.47	22.36	2.79	-1.31	0.83	-1.15	0.85	-2.46	1.23	-43.47	11.37	-13.15	1.23	-56.62	11.3	-33.89	11.48	-2.84	1.64	-36.73	11.6	15.15	10.11	-1.03	0.83	14.12	9.93	0.96	0.09	0.04	0.02	1	0.09	16.11	10.04	-0.99	0.82	15.12	9.86	-17.77	2.76	-3.83
	50	51	GLU	286	6.61	1.72	11.43	1.3	18.04	2.28	-1.84	0.93	-1.25	0.97	-3.09	1.39	12.53	9.95	-12.68	1.65	-0.15	11.07	17.3	10.05	-2.5	1.92	14.8	11.06	-72.87	9.58	-5.35	1.13	-78.22	10.47	0.28	0.08	0.03	0.01	0.31	0.07	-72.59	9.53	-5.32	1.13	-77.91	10.42	-55.29	1.63	-7.81
	51	52	ALA	287	2.67	0.78	10.97	1.16	13.64	1.49	-1.49	0.33	-2.46	0.77	-3.95	0.85	2.23	0.14	-9.87	0.98	-7.64	0.98	3.4	0.91	-1.35	1.57	2.05	1.91	-0.29	0.07	0.49	0.72	0.2	0.74	0.05	0.02	0.02	0.01	0.07	0.02	-0.24	0.07	0.51	0.72	0.27	0.74	3.16	0.9	-0.84
	52	53	ALA	288	2.77	0.87	11.05	1.15	13.82	1.58	-0.91	0.2	-1.75	0.73	-2.65	0.79	2.14	0.15	-6.21	1.24	-4.07	1.26	4.01	0.93	3.09	1.61	7.1	1.9	-0.15	0.08	-0.55	1	-0.7	1.01	0.33	0.04	0.05	0.03	0.39	0.05	0.18	0.09	-0.49	1	-0.31	1	4.18	0.91	2.6
	53	54	VAL	289	6.29	1.8	11.13	1.34	17.43	2.31	-1.01	0.69	-0.48	0.9	-1.49	1.23	-19.82	0.72	-9.88	1.17	-29.7	1.08	-14.53	1.85	0.77	1.76	-13.76	2.58	4.7	0.6	-3.91	0.85	0.79	0.65	0.4	0.06	0	0.01	0.41	0.06	5.1	0.59	-3.91	0.85	1.2	0.64	-9.43	1.82	-3.14
	54	55	MET	290	8.72	1.89	11.3	1.38	20.02	2.4	-4.71	0.78	-1.81	0.84	-6.52	1.21	-0.94	0.67	-0.92	1.11	-1.86	1.25	3.07	1.93	8.57	1.84	11.64	2.77	0.65	0.58	-4.29	0.95	-3.64	1.02	0.16	0.04	0.01	0.01	0.17	0.04	0.81	0.58	-4.28	0.95	-3.47	1.01	3.88	1.91	4.29
	55	56	LYS	291	11.1	2.15	10.65	1.37	21.74	2.79	-1.5	0.75	-1.3	0.66	-2.8	1.14	-3.58	10.33	-10.5	1.42	-14.07	10.04	6.02	10.67	-1.15	1.68	4.87	10.56	-22.86	9.77	-1.85	1.28	-24.71	9.35	0.89	0.08	0.09	0.05	0.98	0.1	-21.97	9.75	-1.76	1.26	-23.73	9.35	-15.95	2.55	-2.91
	56	57	GLU	292	6.7	1.71	10.85	1.45	17.56	2.22	-1.9	0.85	-0.37	1.04	-2.27	1.38	-14.2	8.89	-15.32	1.69	-29.52	9.49	-9.39	8.98	-4.84	2.21	-14.23	9.63	-49.09	8.25	-2.56	0.93	-51.65	8.57	0.47	0.07	0.02	0.01	0.5	0.07	-48.62	8.2	-2.54	0.93	-51.16	8.52	-58.01	1.77	-7.38
	57	58	ILE	293	9.48	1.81	11.32	1.47	20.8	2.52	-2.67	1.03	-0.99	0.69	-3.66	1.34	-6.69	0.42	2.82	1.05	-3.87	0.99	0.12	2.07	13.16	1.59	13.28	2.67	4.28	0.39	-7.59	0.65	-3.32	0.53	0.11	0.04	0.01	0.01	0.12	0.04	4.39	0.4	-7.59	0.65	-3.2	0.54	4.51	2.04	5.57
	58	59	LYS	294	11.21	1.94	11.63	1.34	22.84	2.46	-0.37	0.85	-0.79	0.69	-1.16	1.11	-3.66	5.05	-3.6	1.22	-7.26	5.1	7.17	5.36	7.24	1.55	14.42	5.44	-23.34	5.07	-3.3	0.9	-26.64	5.07	1.08	0.17	0.09	0.04	1.18	0.16	-22.25	5.05	-3.21	0.89	-25.47	5.06	-15.08	2.11	4.03
	59	60	HIS	295	24.58	1.68	11.37	1.22	35.95	2.18	-6.85	0.87	-0.45	0.68	-7.29	1.01	-14.89	1.81	-0.74	1.07	-15.62	2.33	2.85	2.28	10.18	1.62	13.03	2.8	-0.21	1.46	-4.63	0.71	-4.85	1.76	0.2	0.04	0.08	0.02	0.28	0.04	-0.01	1.43	-4.56	0.71	-4.57	1.74	2.84	1.97	5.63
	60	61	PRO	296	12.14	1.4	13.99	1.36	26.13	2.23	-1.06	0.48	-1.34	0.54	-2.4	0.69	-8.94	0.94	0.22	1.19	-8.72	0.93	2.15	1.87	12.86	1.68	15.01	2.4	8.27	0.91	-10.79	1	-2.52	0.73	0.68	0.03	0.1	0.02	0.78	0.03	8.95	0.91	-10.69	0.99	-1.74	0.72	11.09	1.54	2.18
	61	62	ASN	297	11.6	1.9	10.03	1.48	21.63	2.53	-4.42	0.76	-1.61	0.93	-6.03	1.24	-81.29	1.31	-7.93	0.85	-89.22	1.7	-74.11	1.84	0.49	1.31	-73.62	2.39	-3.95	0.76	-0.53	0.28	-4.48	0.81	0.11	0.02	0	0	0.11	0.02	-3.84	0.75	-0.53	0.28	-4.37	0.81	-77.96	1.65	-0.03
	62	63	LEU	298	8.62	2.18	9.96	1.29	18.58	2.76	-4.29	0.82	-1.87	0.83	-6.16	1.23	-27.97	0.43	-1.59	2.02	-29.56	1.97	-23.65	2.39	6.51	2.33	-17.14	3.46	4.26	0.26	-5.42	0.98	-1.15	0.88	0.02	0.01	0	0	0.03	0.01	4.28	0.26	-5.41	0.98	-1.13	0.88	-19.37	2.37	1.1
	63	64	VAL	299	6.29	1.57	10.38	1.14	16.67	2.05	-2.05	0.83	-1.53	0.6	-3.57	1.13	-21.48	0.44	-5.69	1.11	-27.17	1.07	-17.24	1.82	3.17	1.44	-14.07	2.3	6.35	0.38	-8.67	0.91	-2.31	0.7	0.1	0.03	0	0	0.1	0.03	6.45	0.37	-8.66	0.91	-2.21	0.71	-10.79	1.8	-5.5
	64	65	GLN	300	14.32	2.28	10.75	1.2	25.08	2.9	-2.47	0.66	-2.28	0.75	-4.75	1.1	-65.57	2.26	-5.33	1.19	-70.91	2.4	-53.73	2.61	3.14	1.45	-50.58	3.17	-7.5	1.77	-3.91	0.6	-11.4	1.86	0.58	0.09	0.01	0.01	0.59	0.1	-6.91	1.74	-3.9	0.6	-10.81	1.84	-60.64	2.07	-0.76
	65	66	LEU	301	8.57	1.89	10.98	1.3	19.55	2.36	-3.16	0.98	-1.77	0.85	-4.93	1.32	-25.35	0.75	-2.15	1.95	-27.49	1.78	-19.93	2.35	7.06	2.2	-12.87	3.25	1.55	0.58	-3.3	1.28	-1.75	1.08	0.07	0.03	0.07	0.03	0.14	0.05	1.62	0.59	-3.23	1.27	-1.61	1.06	-18.31	2.22	3.83
	66	67	LEU	302	9.74	1.97	11.25	1.27	20.99	2.57	-3.24	0.87	-1.04	0.79	-4.28	1.25	-25.66	0.38	-5.73	1.36	-31.39	1.31	-19.16	2	4.48	2.01	-14.68	3.11	2.17	0.29	-3.48	1.12	-1.31	1	0.15	0.05	0.08	0.03	0.24	0.06	2.32	0.3	-3.4	1.11	-1.07	1	-16.84	2.02	1.09
	67	68	GLY	303	0	0	8.04	1.23	8.04	1.23	0	0	-3.33	0.77	-3.33	0.77	0	0	-8.4	0.89	-8.4	0.89	0	0	-3.69	1.31	-3.69	1.31	0	0	-2.85	0.48	-2.85	0.48	0	0	0	0	0	0	0	0	-2.85	0.48	-2.85	0.48	0	0	-6.54
	68	69	VAL	304	6.38	1.65	9.76	1.39	16.14	2.21	-2.38	0.7	-2.03	0.87	-4.41	1.29	-17.97	0.59	-11.1	1.17	-29.07	1.06	-13.97	1.75	-3.38	1.62	-17.35	2.11	2.72	0.47	-3.69	0.84	-0.98	0.59	0.1	0.03	0	0	0.1	0.03	2.82	0.48	-3.69	0.84	-0.87	0.59	-11.15	1.65	-7.07
	69	70	CYS	305	3.17	1.06	11.13	1.13	14.3	1.73	-3.19	0.65	-2.15	0.83	-5.33	1	4.82	0.69	-8.46	1.15	-3.64	1.38	4.8	1.25	0.52	1.42	5.32	2.07	-0.76	0.32	-0.63	0.52	-1.39	0.63	0.02	0.01	0.01	0.01	0.03	0.01	-0.74	0.32	-0.62	0.52	-1.36	0.63	4.06	1.17	-0.09
	70	71	THR	306	6.29	1.71	10.9	1.45	17.18	2.52	-1.81	0.63	-0.4	0.69	-2.21	1.06	-22.91	1.05	0.41	1.15	-22.5	1.64	-18.43	2.02	10.91	1.56	-7.52	2.54	-0.94	1.01	-7.63	0.53	-8.57	1.16	0.16	0.04	0.11	0.03	0.26	0.05	-0.78	1	-7.52	0.52	-8.31	1.15	-19.21	1.74	3.38
	71	72	ARG	307	13.46	2.9	11.34	1.46	24.8	3.31	-0.06	1.49	-0.09	0.64	-0.15	1.65	-228.66	9.81	-4.08	1.07	-232.74	10.01	-215.26	10.07	7.16	1.61	-208.09	10.39	33.64	7.68	-7.52	0.68	26.11	7.9	0.87	0.11	0.26	0.02	1.12	0.11	34.5	7.6	-7.27	0.67	27.24	7.83	-180.75	3.53	-0.1
	72	73	GLU	308	6.08	1.81	11.04	1.39	17.12	2.49	-1.33	0.99	-0.25	0.64	-1.57	1.3	-12.72	10.33	-1.13	1.71	-13.85	10.02	-7.97	10.38	9.66	2.01	1.69	10.1	-51.65	10.02	-6.31	1.16	-57.96	9.77	0.46	0.07	0.02	0.01	0.48	0.07	-51.19	9.96	-6.29	1.16	-57.48	9.71	-59.16	2.35	3.37
	73	74	PRO	309	12.45	1.44	14.56	1.44	27.02	1.95	-1.56	0.49	-0.91	0.68	-2.47	0.83	-8.28	0.84	10.33	1.92	2.05	1.6	2.61	1.79	23.99	2.42	26.59	2.61	7.65	0.81	-11.19	1.78	-3.54	1.42	0.49	0.04	0.08	0.03	0.57	0.04	8.14	0.8	-11.11	1.77	-2.97	1.41	10.75	1.47	12.88
	74	75	PRO	310	12.2	1.35	12.99	1.15	25.19	1.8	-2.19	0.41	-2.11	1.01	-4.3	1.06	-4.64	0.97	-3.53	3.41	-8.17	3.19	5.37	1.9	7.35	3.25	12.72	3.42	3.96	0.9	-6.47	1.58	-2.51	1.36	0.4	0.05	0	0	0.4	0.05	4.36	0.91	-6.47	1.58	-2.11	1.38	9.73	1.52	0.88
	75	76	PHE	311	8.17	1.91	9.59	1.21	17.76	2.33	-4.32	0.79	-2.6	0.84	-6.92	1.26	0.17	0.35	-9.57	1.25	-9.39	1.37	4.03	2.06	-2.57	1.27	1.45	2.4	0.17	0.27	-1.18	0.49	-1	0.56	0.14	0.03	0	0	0.14	0.03	0.31	0.26	-1.18	0.49	-0.86	0.56	4.34	2.06	-3.75
	76	77	TYR	312	8.91	2.24	10.17	1.23	19.08	2.66	-3.99	0.7	-2.88	0.67	-6.87	1.02	-16.94	0.96	-7.91	0.91	-24.85	1.38	-12.02	2.5	-0.62	1.24	-12.64	2.84	-3.66	0.62	-0.76	0.32	-4.42	0.72	0.21	0.04	0	0	0.21	0.04	-3.45	0.61	-0.76	0.32	-4.21	0.71	-15.47	2.42	-1.39
	77	78	ILE	313	9.5	1.96	10.9	1.3	20.41	2.55	-3.55	1.04	-2.01	0.76	-5.55	1.25	-5.4	0.37	-4.46	1.09	-9.86	1.02	0.56	2.05	4.43	1.67	4.99	2.67	3.46	0.33	-5.02	0.6	-1.56	0.53	0.03	0.01	0	0	0.03	0.01	3.49	0.33	-5.02	0.6	-1.53	0.53	4.05	1.99	-0.58
	78	79	ILE	314	10.28	2.24	10.74	1.2	21.02	2.58	-4.63	0.96	-1.73	1.03	-6.37	1.72	-4.81	0.35	-12.41	1.03	-17.23	1.03	0.83	2	-3.41	1.36	-2.58	2.27	2.87	0.31	-2	0.49	0.87	0.35	0	0	0	0	0	0	2.87	0.31	-2	0.49	0.87	0.35	3.7	1.97	-5.4
	79	80	THR	315	6.49	1.58	10.27	1.18	16.76	2.12	-2.96	0.61	-1.57	1.08	-4.53	1.3	-22.68	0.73	-16.15	0.99	-38.83	1.3	-19.14	1.81	-7.46	1.37	-26.6	2.28	0.66	0.5	-2.09	0.49	-1.43	0.67	0.15	0.02	0	0	0.15	0.02	0.81	0.49	-2.09	0.49	-1.28	0.67	-18.33	1.72	-9.55
	80	81	GLU	316	6.34	1.9	9.99	1.41	16.34	2.64	-2	1.33	-1.64	0.73	-3.64	1.66	-0.97	4.1	2.88	0.99	1.91	4.33	3.38	3.76	11.23	1.63	14.61	4.33	-60.68	3.77	-10.8	0.76	-71.47	4.06	0.2	0.03	0.04	0.01	0.24	0.04	-60.48	3.76	-10.76	0.76	-71.24	4.05	-57.1	1.93	0.48
	81	82	PHE	317	8.17	2.16	9.8	1.29	17.97	2.83	-1.71	0.55	-1.37	0.64	-3.09	0.9	0.18	0.43	-2.84	0.89	-2.66	0.97	6.64	2.28	5.59	1.36	12.22	2.85	-0.59	0.43	-4.87	0.61	-5.46	0.74	0.4	0.06	0.13	0.02	0.53	0.07	-0.2	0.41	-4.74	0.61	-4.93	0.73	6.44	2.3	0.85
	82	83	MET	318	7.46	2.15	11.12	1.41	18.58	2.47	-5.96	0.83	-1.8	0.59	-7.76	1.14	-2.98	0.45	-2.02	0.79	-5	0.94	-1.48	2.31	7.3	1.7	5.82	2.72	2.85	0.39	-6.79	0.61	-3.95	0.65	0.04	0.02	0.07	0.02	0.11	0.03	2.89	0.39	-6.73	0.61	-3.84	0.65	1.41	2.2	0.57
	83	84	THR	319	6.25	1.55	12.56	1.48	18.82	2.3	-0.57	0.9	-0.53	0.63	-1.11	1.17	-32.45	1.73	-7.12	0.76	-39.57	1.94	-26.77	2.17	4.91	1.39	-21.86	2.55	5	0.81	-9.5	0.61	-4.5	0.97	0.37	0.05	0.2	0.02	0.58	0.06	5.37	0.8	-9.3	0.6	-3.92	0.96	-21.4	1.78	-4.39
	84	85	TYR	320	8.87	2.07	8.89	1.38	17.76	2.61	-1.03	0.72	-0.77	0.65	-1.8	1.03	-17.64	0.88	-0.75	1.13	-18.39	1.34	-9.8	2.14	7.36	1.67	-2.44	2.64	-4.11	0.72	-8.81	0.92	-12.91	0.95	0.7	0.07	0.15	0.04	0.86	0.06	-3.4	0.71	-8.66	0.92	-12.06	0.95	-13.2	2.12	-1.29
	85	86	GLY	321	0	0	8.27	1.5	8.27	1.5	0	0	-2	0.56	-2	0.56	0	0	-7.95	1.14	-7.95	1.14	0	0	-1.68	1.83	-1.68	1.83	0	0	-3.33	0.83	-3.33	0.83	0	0	0.21	0.03	0.21	0.03	0	0	-3.12	0.84	-3.12	0.84	0	0	-4.8
	86	87	ASN	322	11.64	1.78	10.35	1.32	21.99	2.27	-4.36	0.53	-2.81	0.56	-7.17	0.89	-79.2	1.57	-0.43	1.85	-79.64	2.54	-71.91	2.21	7.1	1.92	-64.81	2.97	-5.11	1.18	-6.02	1.29	-11.12	1.88	0.12	0.04	0.01	0.01	0.13	0.04	-4.99	1.17	-6.01	1.29	-10.99	1.88	-76.9	1.8	1.09
	87	88	LEU	323	8.53	1.75	11.68	1.22	20.22	2.04	-4.52	0.9	-2.35	0.84	-6.87	1.37	-28.84	0.36	-0.17	0.96	-29	1.06	-24.82	1.93	9.17	1.27	-15.66	2.1	5.07	0.2	-7.87	0.5	-2.8	0.48	0	0	0	0	0	0	5.07	0.2	-7.87	0.5	-2.8	0.48	-19.75	1.92	1.3
	88	89	LEU	324	8.67	1.92	11.67	1.44	20.33	2.45	-2.73	0.84	-3	0.75	-5.73	1.26	-28.58	0.44	-4.4	0.84	-32.99	0.97	-22.65	2.18	4.27	1.63	-18.38	2.69	4.61	0.29	-7.54	0.58	-2.93	0.58	0.21	0.04	0	0	0.21	0.04	4.82	0.29	-7.54	0.58	-2.72	0.58	-17.83	2.1	-3.27
	89	90	ASP	325	4.38	1.36	10.42	1.19	14.81	1.95	-2.11	0.37	-2.21	0.67	-4.31	0.81	62.5	8.22	6.18	2.67	68.67	9.56	64.77	8.25	14.39	2.78	79.17	9.67	-125.42	7.31	-20.64	2.4	-146.06	8.52	0.49	0.06	0.01	0.01	0.51	0.06	-124.93	7.34	-20.63	2.4	-145.56	8.55	-60.16	1.48	-6.24
	90	91	TYR	326	8.29	2.27	11.22	1.23	19.51	2.62	-4.25	0.72	-1.85	0.83	-6.1	1	-19.52	0.93	-4.13	1.57	-23.64	1.63	-15.48	2.65	5.24	2.08	-10.24	3.38	-1.08	0.85	-5.26	0.64	-6.35	0.9	0.15	0.06	0.02	0.01	0.17	0.06	-0.94	0.82	-5.24	0.63	-6.18	0.88	-16.41	2.48	0
	91	92	LEU	327	9.05	1.89	11.45	1.25	20.5	2.41	-4.68	0.95	-2.17	0.78	-6.85	1.28	-28.85	0.42	6.18	1.17	-22.67	1.12	-24.48	2.07	15.46	1.77	-9.02	2.8	5.51	0.24	-8.36	1.03	-2.84	0.96	0	0	0.02	0.01	0.02	0.01	5.51	0.24	-8.34	1.03	-2.82	0.96	-18.97	2.02	7.13
	92	93	ARG	328	12.65	2.66	10.39	1.15	23.04	3.1	-3.66	0.95	-0.46	0.65	-4.13	1.26	-236.85	4.65	-9.54	0.8	-246.39	4.68	-227.87	5.19	0.38	1.33	-227.48	5.51	50.96	4.53	-5.05	0.51	45.91	4.52	0.81	0.07	0.26	0.02	1.06	0.08	51.76	4.49	-4.79	0.51	46.97	4.48	-176.11	2.54	-4.4
	93	94	GLU	329	6.17	1.88	10.43	1.5	16.6	2.54	-1.05	0.67	0.41	0.7	-0.64	1.01	74.84	7.14	-4.32	1.01	70.52	7.36	79.96	7.26	6.52	1.68	86.47	7.64	-136.12	5.94	-14.17	0.69	-150.29	6.17	0.78	0.07	0.25	0.03	1.03	0.06	-135.34	5.99	-13.92	0.68	-149.26	6.21	-55.38	2.23	-7.41
	94	95	CYS	330	3.4	1.12	9.51	1.3	12.9	1.77	-3.32	0.51	-0.15	0.72	-3.46	0.96	6.3	1.21	-5.62	1.21	0.68	1.81	6.38	1.74	3.74	1.65	10.12	2.29	-1.66	0.79	-2.66	1.13	-4.32	1.48	0.01	0.01	0.14	0.03	0.16	0.04	-1.65	0.79	-2.51	1.11	-4.16	1.47	4.73	1.24	1.23
	95	96	ASN	331	10.9	1.74	10.52	1.2	21.42	2.33	-1.46	0.67	-0.55	0.86	-2.01	1.25	-84.6	2.89	-0.06	1.44	-84.67	3.47	-75.17	3.41	9.91	1.76	-65.26	4.41	-3.24	2.22	-3.42	0.77	-6.66	2.55	0.51	0.06	0.11	0.02	0.62	0.06	-2.72	2.17	-3.31	0.77	-6.04	2.5	-77.89	1.85	6.59
	96	97	ARG	332	12.82	2.74	11.32	1.48	24.14	3.26	-3.01	0.8	-0.71	0.68	-3.72	1.15	-225.86	5.55	-2.6	1.16	-228.46	5.6	-216.05	5.98	8.01	1.52	-208.04	6.45	40.9	5.3	-6.74	0.77	34.17	5.32	0.95	0.08	0.17	0.04	1.12	0.08	41.86	5.24	-6.57	0.77	35.29	5.27	-174.19	2.82	1.44
	97	98	GLN	333	13.67	2.27	10.41	1.26	24.08	2.72	0.01	0.66	0.69	0.69	0.7	1.06	-64.43	2.08	-11.29	1.2	-75.72	2.31	-50.75	2.7	-0.19	1.66	-50.94	3.4	-10.84	1.45	-6.32	0.89	-17.16	1.65	1.04	0.05	0.25	0.04	1.29	0.06	-9.8	1.43	-6.07	0.88	-15.88	1.62	-60.55	2.03	-6.26
	98	99	GLU	334	5.91	1.74	10.91	1.43	16.82	2.38	-1.21	0.73	-0.35	0.77	-1.55	1.17	42.59	3.72	1.2	1.67	43.79	4.47	47.3	4.19	11.76	1.78	59.06	4.9	-105.32	3.78	-11.42	1.38	-116.73	4.42	0.73	0.1	0.12	0.05	0.85	0.11	-104.59	3.74	-11.29	1.36	-115.89	4.37	-57.29	1.74	0.47
	99	100	VAL	335	6.26	1.59	10.43	1.4	16.69	2.13	-2.72	0.76	-0.75	0.94	-3.47	1.29	-22.78	0.51	-1.66	1.51	-24.45	1.57	-19.24	1.75	8.02	1.8	-11.23	2.34	7.49	0.37	-10.68	1.08	-3.19	1.07	0.02	0.02	0.01	0.01	0.02	0.03	7.51	0.37	-10.67	1.08	-3.17	1.05	-11.74	1.71	-2.66
	100	101	ASN	336	11.4	1.93	10.14	1.37	21.54	2.47	-1.85	0.59	-0.44	0.86	-2.29	1.09	-81.13	3.06	-7.17	1.17	-88.3	3.65	-71.58	3.58	2.53	1.69	-69.05	4.39	-5.14	2.56	-3.73	0.6	-8.88	2.98	0.5	0.06	0.03	0.01	0.54	0.06	-4.64	2.52	-3.7	0.6	-8.34	2.94	-76.22	1.87	-1.17
	101	102	ALA	337	2.7	0.63	11.23	1.43	13.93	1.65	-0.82	0.2	-1.67	0.61	-2.49	0.63	2.22	0.12	-3.17	0.81	-0.95	0.84	4.1	0.68	6.39	1.43	10.49	1.76	-0.24	0.06	-3.94	0.58	-4.18	0.6	0.24	0.07	0.08	0.02	0.32	0.08	0	0.08	-3.86	0.57	-3.86	0.57	4.1	0.7	2.53
	102	103	VAL	338	6.48	1.62	11.13	1.44	17.61	2.22	0.1	0.83	-0.36	0.84	-0.26	1.27	-21.62	0.59	-3.2	1.26	-24.83	1.28	-15.04	1.72	7.56	1.46	-7.48	2.34	6.41	0.41	-9.61	0.86	-3.2	0.76	0.69	0.07	0.02	0.01	0.7	0.07	7.1	0.42	-9.59	0.85	-2.5	0.75	-7.95	1.75	-2.03
	103	104	VAL	339	6.23	1.67	11.29	1.38	17.52	2.11	-2.41	0.82	-0.7	0.93	-3.11	1.33	-22.19	0.54	-5.31	1.01	-27.5	1.18	-18.37	2.13	5.27	1.4	-13.1	2.47	7.22	0.41	-8.69	0.45	-1.47	0.47	0.16	0.04	0.02	0.01	0.17	0.04	7.37	0.41	-8.67	0.45	-1.3	0.47	-10.99	1.96	-3.4
	104	105	LEU	340	9.7	2.11	11.42	1.32	21.12	2.76	-3.56	0.79	-2.07	0.9	-5.63	1.22	-27.8	0.36	-2.39	1.09	-30.19	1.21	-21.66	2.25	6.96	1.45	-14.7	2.81	4.57	0.26	-6.28	0.41	-1.71	0.49	0.09	0.03	0.01	0.01	0.1	0.03	4.66	0.26	-6.27	0.41	-1.61	0.48	-17	2.21	0.69
	105	106	LEU	341	9	1.85	11.63	1.48	20.63	2.45	-2.49	1.07	-1.33	0.95	-3.82	1.52	-28.92	0.44	-7.6	1.21	-36.51	1.32	-22.4	1.94	2.7	1.74	-19.71	2.73	4.93	0.32	-6.04	0.38	-1.11	0.43	0.15	0.05	0.02	0.01	0.17	0.06	5.08	0.31	-6.03	0.38	-0.95	0.43	-17.33	1.9	-3.33
	106	107	TYR	342	8.63	2.37	11.13	1.42	19.76	2.81	-2.18	0.71	-2.9	0.77	-5.07	1.14	-19.72	0.64	-10.2	1.03	-29.93	1.27	-13.27	2.5	-1.97	1.54	-15.24	3.09	-2.38	0.57	-2.55	0.31	-4.93	0.66	0.56	0.1	0	0	0.57	0.1	-1.82	0.51	-2.55	0.31	-4.36	0.61	-15.08	2.44	-4.52
	107	108	MET	343	7.16	1.71	11.39	1.24	18.55	2.3	-6.28	0.78	-3.12	0.7	-9.4	1.1	-3.18	0.47	-7.51	0.9	-10.69	1.09	-2.3	2.05	0.76	1.31	-1.54	2.6	3.3	0.35	-4.1	0.3	-0.8	0.45	0	0	0	0	0	0	3.3	0.35	-4.1	0.3	-0.8	0.45	1	1.97	-3.34
	108	109	ALA	344	2.75	0.75	11.12	1.28	13.87	1.51	-1.89	0.29	-2.92	0.89	-4.81	0.95	2.26	0.12	-11.08	1.33	-8.81	1.34	3.12	0.79	-2.87	1.47	0.25	1.64	-0.29	0.05	-0.32	0.37	-0.62	0.37	0.02	0.01	0	0	0.02	0.01	-0.28	0.05	-0.32	0.37	-0.6	0.37	2.85	0.8	-3.2
	109	110	THR	345	6.41	1.51	11.13	1.22	17.54	2.03	-3.09	0.73	-1.91	1.07	-5	1.28	-25.06	0.92	-11.7	1.76	-36.76	2.09	-21.73	1.7	-2.49	1.67	-24.22	2.52	2.21	0.5	-4.62	0.44	-2.42	0.57	0.08	0.04	0	0	0.08	0.04	2.29	0.48	-4.62	0.44	-2.34	0.57	-19.45	1.61	-7.11
	110	111	GLN	346	13.34	1.85	11.01	1.18	24.35	2.41	-5.67	0.83	-3.34	0.69	-9.01	1.08	-74.53	1.52	-5.14	0.75	-79.67	1.87	-66.86	2.12	2.54	1.35	-64.32	2.81	1.11	0.72	-3.1	0.35	-1.99	0.88	0.06	0.03	0.01	0.01	0.07	0.03	1.18	0.71	-3.09	0.35	-1.92	0.87	-65.68	1.93	-0.56
	111	112	ILE	347	9.54	1.95	11.18	1.12	20.72	2.29	-3.02	1.35	-1.49	0.71	-4.51	1.61	-7.55	0.24	-4.88	0.95	-12.43	0.95	-1.03	2.13	4.8	1.37	3.78	2.57	5.98	0.21	-7.07	0.36	-1.09	0.32	0	0	0	0	0	0	5.98	0.21	-7.07	0.36	-1.08	0.32	4.96	2.09	-2.26
	112	113	SER	348	3.68	0.76	11.42	1.2	15.1	1.51	-3.06	0.5	-3.28	0.88	-6.34	0.98	-4.33	1.92	-6.59	1.08	-10.92	2.23	-3.72	2	1.55	1.33	-2.17	2.41	2.44	1.28	-6.41	0.71	-3.98	1.23	0	0	0	0	0	0	2.44	1.28	-6.41	0.71	-3.98	1.23	-1.28	0.99	-4.86
	113	114	SER	349	3.68	0.84	11.31	1.17	14.99	1.53	-1.95	0.74	-3.28	0.7	-5.23	1.16	-5.55	1.85	-5.81	1.24	-11.36	2.43	-3.82	1.89	2.22	1.66	-1.6	2.72	1.74	1.38	-5.93	0.91	-4.2	1.85	0.13	0.03	0	0	0.13	0.03	1.86	1.37	-5.93	0.91	-4.07	1.84	-1.96	1.2	-3.71
	114	115	ALA	350	2.69	0.77	11.12	1.2	13.81	1.65	-1.93	0.43	-3.92	0.67	-5.85	0.79	2.31	0.12	-8.79	0.75	-6.48	0.78	3.08	0.91	-1.59	1.44	1.48	1.95	-0.32	0.05	0.38	0.4	0.06	0.42	0	0	0	0	0	0	-0.32	0.05	0.38	0.4	0.06	0.42	2.75	0.9	-1.21
	115	116	MET	351	7.44	1.83	10.88	1.41	18.32	2.31	-6.57	0.74	-2.97	0.74	-9.54	1	-3.94	0.33	-9.29	0.9	-13.23	0.93	-3.07	1.77	-1.38	1.66	-4.45	2.32	3.68	0.24	-3.61	0.51	0.07	0.53	0.01	0.01	0	0	0.01	0.01	3.69	0.24	-3.61	0.51	0.08	0.53	0.62	1.77	-4.99
	116	117	GLU	352	7.49	1.79	10.87	1.47	18.36	2.46	-3.63	0.83	-2.46	0.86	-6.09	1.16	47.62	15.16	-3.94	1.1	43.68	15.18	51.48	14.51	4.47	1.84	55.95	14.85	-106.4	14.18	-8.18	0.99	-114.58	14.03	0.3	0.1	0	0	0.31	0.1	-106.1	14.1	-8.17	0.99	-114.27	13.94	-54.62	1.85	-3.7
	117	118	TYR	353	8.26	1.97	10.71	1.23	18.97	2.61	-3.69	0.73	-2.58	0.74	-6.26	1.11	-21.2	1.68	-7.56	1.08	-28.76	1.77	-16.62	2.29	0.57	1.5	-16.05	2.86	-0.98	1.11	-0.4	0.54	-1.38	1.15	0.29	0.06	0	0.01	0.3	0.06	-0.69	1.07	-0.4	0.55	-1.08	1.12	-17.31	2.02	0.18
	118	119	LEU	354	8.78	1.75	11.53	1.31	20.31	2.25	-3.47	0.71	-2.45	0.78	-5.93	1.06	-28.13	0.36	-8.95	1.27	-37.07	1.32	-22.82	1.86	0.13	1.55	-22.69	2.35	4.57	0.22	-3.08	0.67	1.49	0.64	0.08	0.02	0	0	0.08	0.02	4.65	0.22	-3.07	0.67	1.57	0.64	-18.17	1.83	-2.95
	119	120	GLU	355	5.57	1.52	11.14	1.13	16.71	1.99	-3.91	0.87	-1.66	0.86	-5.58	1.33	26.16	4.43	-0.44	1.24	25.71	4.9	27.82	4.29	9.04	1.48	36.85	4.77	-82.28	3.58	-7.6	0.87	-89.88	3.91	0.2	0.03	0.05	0.01	0.25	0.04	-82.08	3.57	-7.54	0.86	-89.63	3.9	-54.26	1.96	1.49
	120	121	LYS	356	11.32	2.51	11.17	1.33	22.49	2.87	-0.96	0.75	-0.81	0.54	-1.77	0.97	-47.64	21.25	0.34	1.26	-47.3	21.11	-37.27	21.25	10.69	1.67	-26.58	21.17	19.45	20.11	-3.36	0.97	16.09	19.82	0.99	0.13	0.24	0.03	1.23	0.11	20.44	20.02	-3.12	0.96	17.31	19.74	-16.83	2.82	7.57
	121	122	LYS	357	12.02	2.21	10.41	1.46	22.43	2.9	-3.34	0.91	-0.54	0.67	-3.88	1.28	-41.48	9.26	-9.52	1.33	-51	9.31	-32.8	9.64	0.35	1.64	-32.45	9.78	12.95	8.32	-2.96	0.98	10	8.54	0.47	0.08	0.12	0.02	0.59	0.09	13.42	8.27	-2.84	0.97	10.59	8.49	-19.38	2.62	-2.49
	122	123	ASN	358	11.3	1.88	10.89	1.52	22.19	2.4	-0.51	0.6	-0.47	0.79	-0.98	1.2	-75.18	1.32	-15.44	1.42	-90.62	1.93	-64.39	2.04	-5.02	2.2	-69.41	2.77	-11.52	1.04	-0.48	1.09	-12	1.49	0.77	0.05	0.1	0.02	0.87	0.06	-10.75	1.02	-0.38	1.08	-11.13	1.47	-75.14	1.64	-5.4
	123	124	PHE	359	8.67	2.2	10.08	1.33	18.76	2.68	-1.77	0.7	-1.06	0.78	-2.83	1.13	1.05	0.93	-1.61	0.91	-0.55	1.48	7.95	2.3	7.42	1.34	15.38	2.53	-0.85	0.69	-6.26	0.53	-7.11	0.96	0.36	0.05	0.03	0.01	0.39	0.05	-0.49	0.66	-6.24	0.53	-6.73	0.94	7.47	2.24	1.19
	124	125	ILE	360	9.33	1.81	10.42	1.39	19.75	2.45	-1.88	0.87	0.1	0.77	-1.78	1.22	-6.36	0.39	-2.35	1.21	-8.71	1.24	1.08	1.91	8.18	1.64	9.26	2.63	4.06	0.33	-7.15	1.07	-3.09	1.03	0.35	0.06	0.14	0.02	0.49	0.06	4.41	0.33	-7.02	1.07	-2.6	1	5.49	1.89	1.16
	125	126	HIS	361	24.82	1.83	11.61	1.24	36.43	2.25	-6.8	0.6	-0.71	0.88	-7.51	1.13	-14.62	1.26	-2.36	1.33	-16.98	1.95	3.4	2.05	8.54	1.53	11.94	2.72	0.71	0.72	-4.41	0.78	-3.7	1.21	0.08	0.02	0.14	0.02	0.22	0.03	0.79	0.72	-4.27	0.76	-3.48	1.2	4.19	1.91	4.27
	126	127	ARG	362	13.63	2.83	11.32	1.22	24.95	3.08	-2.74	0.68	-1.23	0.58	-3.97	0.89	-199.04	4.43	-12.51	0.99	-211.55	4.45	-188.14	5.18	-2.42	1.46	-190.56	5.28	14.1	4.33	-1.36	0.52	12.74	4.16	0.91	0.08	0.08	0.03	0.99	0.08	15.01	4.36	-1.28	0.51	13.73	4.18	-173.13	2.5	-3.7
	127	128	ASP	363	4.9	1.6	10.08	1.27	14.98	2.14	-0.69	1.15	-0.28	0.94	-0.98	1.51	-11.74	3.51	-9.02	1.43	-20.76	4.12	-7.53	3.51	0.77	1.59	-6.76	4.1	-54.8	3	-8.91	0.66	-63.71	3.39	0.07	0.03	0	0	0.08	0.03	-54.73	2.99	-8.9	0.66	-63.63	3.38	-62.26	1.73	-8.13
	128	129	LEU	364	8.57	1.63	10.94	1.3	19.51	2.24	-4.39	0.8	-1.95	0.74	-6.35	1.25	-28.66	0.31	0.52	0.6	-28.14	0.67	-24.48	1.68	9.51	1.46	-14.97	2.34	4.85	0.18	-6.57	0.48	-1.72	0.45	0	0	0.02	0.01	0.02	0.01	4.85	0.18	-6.55	0.48	-1.71	0.45	-19.64	1.68	2.96
	129	130	ALA	365	2.48	0.76	9.86	1.23	12.34	1.53	-1.38	0.57	-3.41	0.69	-4.79	0.84	2.58	0.15	-9.54	1.08	-6.96	1.1	3.69	0.98	-3.09	1.6	0.6	2.04	-0.47	0.08	0.22	0.32	-0.24	0.35	0	0	0	0	0	0	-0.47	0.08	0.22	0.32	-0.24	0.35	3.22	0.97	-2.87
	130	131	ALA	366	2.68	0.81	10.91	1.31	13.59	1.6	-2.32	0.33	-3.29	0.84	-5.62	0.86	2.08	0.13	-1.52	0.97	0.56	0.98	2.44	0.88	6.09	1.51	8.54	1.87	-0.08	0.05	-0.45	0.33	-0.53	0.33	0	0	0	0	0	0	-0.08	0.05	-0.45	0.33	-0.53	0.33	2.36	0.87	5.64
	131	132	ARG	367	13.38	2.82	10.5	1.39	23.88	3.17	-6.18	1.12	-2.15	0.74	-8.33	1.49	-228.46	4.02	-1.57	0.86	-230.03	4.14	-221.25	4.2	6.78	1.24	-214.48	4.37	45.09	3.29	-5.61	0.52	39.48	3.25	0.12	0.03	0	0	0.13	0.03	45.21	3.28	-5.6	0.51	39.6	3.25	-176.05	2.8	1.17
	132	133	ASN	368	12.46	2.19	10.33	1.43	22.78	2.72	-3.68	1.12	-1.65	0.82	-5.33	1.43	-83.15	1.97	-14.07	0.97	-97.22	2.12	-74.38	2.14	-5.39	1.48	-79.77	2.56	-3.6	0.92	-0.53	0.47	-4.13	1.03	0	0	0	0	0	0	-3.6	0.92	-0.53	0.47	-4.13	1.03	-77.97	1.72	-5.92
	133	134	CYS	369	2.96	1.01	9.77	1.53	12.73	2.03	-4.28	0.4	-2.03	0.89	-6.31	0.95	6.46	0.44	-8.1	0.95	-1.63	1.12	5.14	1.13	-0.35	1.66	4.79	2.15	-1.77	0.17	0.66	0.36	-1.12	0.39	0	0	0	0	0	0	-1.77	0.17	0.66	0.36	-1.12	0.39	3.37	1.12	0.3
	134	135	LEU	370	8.76	1.99	9.88	1.12	18.64	2.47	-3.04	0.82	-1.95	1	-4.99	1.3	-28.15	0.38	-2.68	0.94	-30.83	1	-22.43	2.09	5.24	1.51	-17.19	2.55	4.75	0.25	-4.96	0.4	-0.21	0.46	0.13	0.03	0	0	0.13	0.03	4.88	0.25	-4.96	0.4	-0.08	0.46	-17.55	2.06	0.28
	135	136	VAL	371	6.4	1.75	9.28	1.23	15.68	2.25	-3.4	0.83	-2.12	0.99	-5.52	1.34	-23.87	0.43	-6.86	1.07	-30.73	0.99	-20.87	1.85	0.3	1.51	-20.56	2.46	8.27	0.33	-8.43	0.72	-0.15	0.6	0	0.01	0	0	0	0.01	8.28	0.33	-8.43	0.72	-0.15	0.6	-12.59	1.78	-8.13
	136	137	GLY	372	0	0	9.02	1.41	9.02	1.41	0	0	-3.32	0.74	-3.32	0.74	0	0	-9.75	1.24	-9.75	1.24	0	0	-4.04	1.63	-4.04	1.63	0	0	-4.3	0.86	-4.3	0.86	0	0	0.01	0.01	0.01	0.01	0	0	-4.29	0.86	-4.29	0.86	0	0	-8.33
	137	138	GLU	373	6.17	1.71	9.45	1.3	15.63	2.35	-0.63	0.91	-0.63	0.7	-1.27	1.32	35.1	3.03	3.09	1.01	38.19	3.08	40.64	3.42	11.91	1.54	52.55	3.6	-96.75	2.95	-11.88	0.66	-108.63	3.01	0.73	0.03	0.05	0.02	0.79	0.03	-96.01	2.95	-11.83	0.65	-107.84	3.01	-55.38	1.67	0.08
	138	139	ASN	374	10.9	1.68	10.8	1.37	21.7	2.27	-0.04	0.45	-0.15	0.7	-0.19	1.02	-74.77	1.63	-5.22	0.93	-79.98	1.89	-63.91	1.93	5.43	1.51	-58.47	2.54	-13.03	1.41	-3.82	0.8	-16.86	1.77	0.89	0.03	0.16	0.02	1.05	0.05	-12.15	1.4	-3.66	0.79	-15.81	1.75	-76.05	1.31	1.77
	139	140	HIS	375	24.8	1.64	11.39	1.5	36.19	2.52	-4.01	0.79	-1.43	0.76	-5.43	1.22	-10.61	2.23	-5.9	1.21	-16.51	2.57	10.18	2.82	4.07	1.7	14.25	3.53	-3.72	1.83	-4.58	0.71	-8.29	1.99	0.34	0.11	0.03	0.02	0.37	0.12	-3.37	1.75	-4.55	0.72	-7.92	1.92	6.81	1.92	-0.49
	140	141	LEU	376	8.88	1.96	10.34	1.18	19.22	2.47	-1.75	0.85	-1.42	0.85	-3.17	1.21	-28.63	0.39	-2.54	1.07	-31.17	1.11	-21.49	2.19	6.37	1.55	-15.12	2.87	4.66	0.23	-6.18	0.52	-1.52	0.47	0.43	0.05	0	0	0.43	0.05	5.1	0.23	-6.18	0.52	-1.09	0.48	-16.4	2.14	0.19
	141	142	VAL	377	5.81	1.84	9.97	1.25	15.78	2.46	-3.61	0.84	-1.63	0.88	-5.24	1.28	-22.99	0.41	-1.7	0.85	-24.69	0.83	-20.79	2.01	6.64	1.37	-14.14	2.54	7.65	0.29	-7.87	0.43	-0.22	0.34	0	0	0	0	0	0	7.65	0.29	-7.87	0.43	-0.22	0.34	-13.14	1.96	-1.22
	142	143	LYS	378	10.8	2.16	9.94	1.3	20.74	2.53	-4.41	1.2	-2.04	0.86	-6.45	1.47	-79.67	3.73	-7.55	0.76	-87.22	3.77	-73.29	3.95	0.36	1.25	-72.93	4.25	50.84	3.38	-2.27	0.26	48.58	3.32	0.14	0.03	0	0	0.14	0.03	50.98	3.37	-2.27	0.26	48.72	3.31	-22.31	2.37	-1.91
	143	144	VAL	379	5.82	1.47	9.78	1.23	15.61	2.02	-3.09	0.67	-1.54	0.69	-4.62	1.03	-22.45	0.32	-9.84	0.9	-32.29	0.94	-19.71	1.57	-1.59	1.53	-21.3	2.19	7.03	0.26	-7.87	0.49	-0.84	0.4	0.01	0.01	0	0.01	0.01	0.01	7.04	0.26	-7.86	0.49	-0.82	0.4	-12.67	1.56	-9.46
	144	145	ALA	380	2.59	0.85	10.46	1.47	13.04	1.93	-1.04	0.51	-1.63	0.82	-2.68	1.01	2.2	0.11	-9.01	1.04	-6.81	1.07	3.74	0.94	-0.19	1.64	3.56	1.98	-0.29	0.06	-1.18	0.55	-1.47	0.58	0.02	0.01	0.06	0.02	0.08	0.02	-0.27	0.06	-1.12	0.55	-1.39	0.58	3.47	0.94	-1.3
	145	146	ASP	381	3.95	1.32	9.67	1.14	13.61	1.91	-1.47	0.72	-0.57	0.57	-2.04	0.95	22.66	4.61	2.73	0.84	25.39	4.9	25.14	4.62	11.82	1.45	36.96	5.19	-84.11	4.41	-12.79	0.63	-96.9	4.74	0.39	0.06	0.15	0.02	0.54	0.07	-83.72	4.4	-12.64	0.63	-96.36	4.73	-58.58	1.36	-0.82
	146	147	PHE	382	8.37	2.16	9.56	1.59	17.93	2.9	-2.61	0.68	-0.76	0.67	-3.37	1	0.88	0.34	-5.85	1.13	-4.96	1.18	6.65	2.3	2.96	1.76	9.6	3.05	-0.04	0.23	-2.4	0.77	-2.44	0.76	0.1	0.03	0.08	0.03	0.18	0.04	0.06	0.23	-2.32	0.77	-2.25	0.76	6.71	2.31	0.64
	147	148	GLY	383	0	0	9.08	1.51	9.08	1.51	0	0	-1.55	0.73	-1.55	0.73	0	0	-12.13	2.12	-12.13	2.12	0	0	-4.6	2.34	-4.6	2.34	0	0	1.39	1.1	1.39	1.1	0	0	0.16	0.05	0.16	0.05	0	0	1.56	1.08	1.56	1.08	0	0	-3.04
	148	149	LEU	384	9.02	2.26	11.15	1.42	20.17	2.78	-2.55	0.72	-1.23	0.83	-3.78	1.11	-26.75	0.41	-7.63	1.27	-34.38	1.23	-20.28	2.46	2.28	1.6	-18	2.76	3.42	0.3	-1.98	0.66	1.44	0.59	0.1	0.04	0	0	0.1	0.04	3.52	0.3	-1.98	0.66	1.54	0.58	-16.76	2.43	0.3
	149	150	SER	385	3.63	1.02	10.63	1.35	14.26	1.77	-1.6	0.39	-1.19	0.81	-2.79	1.03	-3.72	1.2	-6.6	3.07	-10.32	2.93	-1.69	1.76	2.84	3.14	1.15	3.11	0.13	1.19	-1.66	2.21	-1.53	2.02	0.24	0.05	0.04	0.04	0.28	0.05	0.37	1.18	-1.62	2.18	-1.25	2.02	-1.32	1.18	1.23
	150	151	ARG	386	13	2.76	10.36	1.35	23.37	3.09	-0.01	1.38	0.39	0.77	0.38	1.59	-206.57	15.48	-2.24	0.9	-208.81	15.28	-193.58	15.03	8.52	1.44	-185.06	14.95	17.73	12.26	-4.77	0.83	12.97	12.02	1.17	0.17	0.25	0.05	1.42	0.16	18.91	12.18	-4.52	0.81	14.39	11.95	-174.68	3.8	4.01
	151	152	LEU	387	8.7	2.01	11.33	1.42	20.03	2.59	-1.07	0.85	0.12	0.77	-0.95	1.21	-26.58	0.5	-6.61	1.11	-33.19	1.04	-18.95	2.31	4.84	1.64	-14.11	2.69	2.65	0.36	-6.46	0.73	-3.81	0.64	0.47	0.09	0.21	0.03	0.68	0.08	3.12	0.34	-6.25	0.73	-3.13	0.66	-15.83	2.28	-1.41
	152	153	MET	388	6.74	1.7	10.03	1.31	16.77	2.3	-3.43	0.7	-0.42	0.95	-3.85	1.1	-1.2	0.74	-9.6	2.59	-10.8	2.56	2.11	1.89	0.01	2.69	2.12	3.31	0.48	0.63	-2.33	1.67	-1.84	1.68	0.55	0.08	0.03	0.01	0.58	0.09	1.03	0.62	-2.3	1.67	-1.26	1.67	3.14	1.84	-2.29
	153	154	THR	389	6.4	1.53	9.69	1.22	16.09	2.12	-0.41	0.82	0.09	0.58	-0.32	1.11	-26.11	2.16	-7.42	1.45	-33.52	2.64	-20.11	2.33	2.36	1.68	-17.75	3.06	0.72	1.29	-6.52	0.96	-5.81	1.61	0.46	0.1	0.23	0.03	0.7	0.1	1.18	1.23	-6.29	0.97	-5.11	1.56	-18.93	1.75	-3.93
	154	155	GLY	390	0	0	10	1.6	10	1.6	0	0	-1.12	0.83	-1.12	0.83	0	0	-6.86	1.27	-6.86	1.27	0	0	2.02	2.32	2.02	2.32	0	0	-5.54	1.85	-5.54	1.85	0	0	0.32	0.05	0.32	0.05	0	0	-5.22	1.8	-5.22	1.8	0	0	-3.2
	155	156	ASP	391	4.18	1.56	10.68	1.34	14.86	2.19	-0.65	0.65	-0.44	0.73	-1.09	1.05	13.12	10.36	-2.35	3.38	10.77	12.7	16.65	10.39	7.88	3.41	24.53	12.69	-78.23	10.09	-10.65	2.47	-88.88	11.99	0.66	0.1	0.1	0.05	0.76	0.12	-77.57	10.01	-10.55	2.45	-88.12	11.89	-60.92	1.37	-2.67
	156	157	THR	392	6.77	1.61	11.61	1.41	18.38	2.25	-2.25	0.66	-1.28	0.85	-3.54	1.19	-20.72	1.94	-6.83	1.02	-27.55	2.01	-16.21	2.51	3.5	1.39	-12.71	3	-1.98	1.47	-5.75	0.67	-7.74	1.78	0.21	0.06	0.02	0.01	0.22	0.06	-1.78	1.43	-5.74	0.67	-7.52	1.74	-17.98	1.8	-2.24
	157	158	TYR	393	8.18	1.84	10.04	1.28	18.22	2.34	-4.72	1.09	-2.02	0.81	-6.74	1.35	-25.26	1.41	-6.41	1.39	-31.67	2.16	-21.8	2.17	1.61	1.69	-20.18	3.06	-0.03	0.45	-2.45	0.96	-2.48	1.11	0.02	0.02	0	0	0.02	0.02	-0.01	0.45	-2.44	0.96	-2.46	1.11	-21.81	2.12	-0.83
	158	159	THR	394	6.11	1.22	10.07	1.27	16.19	1.94	-2.27	0.67	-1.15	0.89	-3.42	1.23	-21.56	1.96	-13.14	1.14	-34.7	2.63	-17.71	2.31	-4.21	1.55	-21.93	3.15	-1.38	1.45	-2.63	0.71	-4.01	1.75	0.17	0.03	0.01	0.01	0.18	0.04	-1.21	1.46	-2.62	0.71	-3.83	1.75	-18.93	1.33	-6.83
	159	160	ALA	395	2.85	0.88	9.94	1.25	12.79	1.69	-0.75	0.26	-0.86	0.6	-1.61	0.64	2.44	0.14	1.31	1.26	3.75	1.29	4.54	0.9	10.39	1.61	14.93	2.15	-0.36	0.09	-7.26	0.95	-7.61	0.98	0.37	0.07	0.18	0.03	0.55	0.07	0.01	0.14	-7.08	0.95	-7.06	0.98	4.55	0.91	3.32
	160	161	HIS	396	24.81	1.75	10.14	1.32	34.94	2.22	-5.22	0.71	-0.5	0.86	-5.72	1.11	-12.43	1.45	-7.03	1.36	-19.45	2.19	7.16	2.58	2.61	1.93	9.77	3.48	-2.91	1.14	-3.63	0.95	-6.54	1.59	0.26	0.08	0.05	0.02	0.31	0.08	-2.65	1.1	-3.57	0.95	-6.22	1.57	4.51	2.04	-0.97
	161	162	ALA	397	2.71	1.08	10.12	1.19	12.82	1.76	-0.39	0.35	0.01	0.52	-0.38	0.73	2.01	0.12	-2.17	1.18	-0.16	1.17	4.33	1.11	7.95	1.68	12.28	2.21	0.15	0.06	-7.37	0.88	-7.22	0.87	0.27	0.08	0.4	0.05	0.68	0.11	0.43	0.09	-6.97	0.87	-6.54	0.81	4.76	1.13	0.98
	162	163	GLY	398	0	0	9.37	1.55	9.37	1.55	0	0	0.2	0.6	0.2	0.6	0	0	-6.38	0.98	-6.38	0.98	0	0	3.18	1.63	3.18	1.63	0	0	-6.69	0.77	-6.69	0.77	0	0	0.66	0.05	0.66	0.05	0	0	-6.03	0.75	-6.03	0.75	0	0	-2.85
	163	164	ALA	399	2.45	0.97	9.04	1.35	11.49	2.01	-0.78	0.27	0.27	0.83	-0.51	0.92	2.23	0.13	0.01	0.89	2.24	0.93	3.91	1.01	9.32	1.52	13.22	2.18	0.05	0.09	-2.92	0.61	-2.87	0.65	0.18	0.07	0.09	0.03	0.27	0.07	0.23	0.1	-2.83	0.62	-2.6	0.63	4.14	1.01	6.49
	164	165	LYS	400	10.82	2.19	9.97	1.2	20.79	2.41	-2.31	0.83	-0.82	0.62	-3.13	1.11	-29.51	7.99	-2.55	0.95	-32.06	7.61	-20.99	8.4	6.6	1.46	-14.4	8.22	3.05	7.87	-4.95	0.79	-1.9	7.67	0.54	0.15	0.18	0.02	0.72	0.15	3.59	7.74	-4.77	0.78	-1.18	7.53	-17.4	2.33	1.83
	165	166	PHE	401	7.48	1.87	11.72	1.36	19.2	2.19	-3.95	0.86	-1.2	0.72	-5.15	1.06	0.75	0.39	-5.2	0.94	-4.46	1.02	4.27	2.26	5.33	1.5	9.6	2.61	-0.12	0.35	-0.72	0.47	-0.84	0.65	0.04	0.04	0.01	0.01	0.05	0.04	-0.08	0.33	-0.71	0.47	-0.79	0.62	4.2	2.19	4.61
	166	167	PRO	402	12.74	1.57	15.45	1.08	28.19	2.13	-3.34	0.69	-2.27	0.8	-5.61	1.11	-7.52	0.65	-1.17	1.34	-8.68	1.15	1.89	1.67	12.02	1.68	13.9	2.46	7.19	0.6	-8.72	0.67	-1.53	0.35	0.06	0.02	0	0	0.06	0.02	7.25	0.6	-8.72	0.67	-1.47	0.34	9.13	1.62	3.3
	167	168	ILE	403	9.74	1.92	12.82	1.29	22.56	2.5	-3.36	0.93	-1.92	0.73	-5.28	1.29	-5.88	0.32	2.6	0.91	-3.28	0.92	0.5	1.79	13.5	1.45	14	2.37	4	0.27	-7.92	0.64	-3.92	0.63	0.03	0.01	0.01	0.01	0.03	0.02	4.02	0.28	-7.91	0.64	-3.89	0.63	4.52	1.78	5.59
	168	169	LYS	404	11.48	2.44	10.54	1.53	22.02	2.96	-4.16	0.91	-1.87	0.85	-6.03	1.24	-66.88	9.65	-3.63	0.88	-70.51	9.55	-59.57	10.05	5.04	1.53	-54.52	10.1	41.01	7.9	-4.45	0.53	36.56	7.93	0.12	0.04	0	0	0.12	0.04	41.12	7.87	-4.45	0.53	36.68	7.91	-18.44	3.37	0.6
	169	170	TRP	405	11.62	2.32	10.31	1.42	21.93	2.93	-9.1	0.76	-2.1	0.77	-11.19	1.17	-2.94	1.18	-10.95	0.81	-13.89	1.52	-0.42	2.7	-2.74	1.49	-3.16	3.17	4.2	0.37	-3.81	0.41	0.39	0.52	0.07	0.02	0	0	0.07	0.03	4.27	0.37	-3.81	0.41	0.46	0.52	3.86	2.63	-6.55
	170	171	THR	406	6.53	1.41	10.28	1.39	16.8	2.14	-3.16	0.69	-1.95	0.72	-5.11	1.03	-24.59	1	-6.94	0.91	-31.53	1.53	-21.23	1.9	1.39	1.69	-19.84	2.65	2.56	0.82	-7.05	0.76	-4.49	1.24	0.02	0.01	0.03	0.01	0.05	0.02	2.58	0.82	-7.02	0.76	-4.44	1.24	-18.65	1.57	-5.63
	171	172	ALA	407	2.64	0.78	11.12	1.42	13.77	1.73	-2.23	0.42	-2.5	0.66	-4.73	0.7	2.39	0.11	2.29	1	4.68	1.04	2.81	0.88	10.92	1.61	13.72	1.92	-0.21	0.06	-1.01	0.45	-1.22	0.47	0	0	0.01	0.01	0.01	0.01	-0.21	0.06	-1.01	0.45	-1.21	0.47	2.6	0.88	9.91
	172	173	PRO	408	12.27	1.34	14.28	1.29	26.55	2.07	-4.27	0.63	-2.63	0.73	-6.9	0.97	-11.42	0.74	-0.17	1.39	-11.59	1.15	-3.41	1.66	11.48	1.73	8.06	2.21	10.55	0.69	-11.71	0.95	-1.16	0.56	0.02	0.02	0.01	0.01	0.03	0.02	10.57	0.7	-11.71	0.95	-1.14	0.56	7.16	1.44	-0.23
	173	174	GLU	409	7.91	1.84	10.92	1.43	18.83	2.51	-1.99	1.33	-2.09	0.95	-4.08	1.9	-22.45	3.88	-9.37	1.45	-31.82	4.49	-16.53	3.77	-0.54	1.9	-17.07	4.45	-42.18	3.02	-4.59	0.85	-46.77	3.39	0.1	0.04	0.01	0.01	0.1	0.04	-42.09	3.01	-4.58	0.85	-46.67	3.38	-58.62	1.89	-5.12
	174	175	SER	410	3.82	1.05	10.96	1.27	14.78	1.72	-2.47	0.67	-2.67	0.84	-5.15	1.02	-6.3	0.76	-6.72	1.03	-13.02	1.12	-4.96	1.2	1.57	1.6	-3.39	1.77	1.05	0.38	-2.96	0.79	-1.91	0.72	0	0	0	0	0	0.01	1.05	0.38	-2.95	0.79	-1.9	0.72	-3.91	1.12	-1.39
	175	176	LEU	411	8.5	1.66	11.05	1.41	19.55	2.31	-4.39	1.05	-1.53	0.81	-5.93	1.41	-27.38	0.49	-3.64	1.32	-31.02	1.35	-23.27	1.84	5.87	1.61	-17.4	2.65	3.91	0.32	-6.08	0.83	-2.17	0.77	0	0	0.03	0.02	0.03	0.02	3.91	0.32	-6.05	0.83	-2.14	0.77	-19.36	1.86	-0.17
	176	177	ALA	412	2.49	0.76	11.19	1.48	13.68	1.86	-1.27	0.32	-1.06	0.7	-2.33	0.76	2.29	0.13	-6.22	1.23	-3.93	1.24	3.51	0.86	3.91	1.64	7.42	2.05	-0.1	0.08	-4.69	0.57	-4.79	0.61	0.11	0.04	0.23	0.03	0.34	0.05	0.01	0.08	-4.46	0.56	-4.45	0.61	3.52	0.84	-0.55
	177	178	TYR	413	8.67	2.29	9.67	1.45	18.35	2.94	0.83	0.62	0.06	0.76	0.89	1.01	-16.59	0.66	-5.5	0.89	-22.09	1.07	-7.08	2.48	4.23	1.72	-2.85	3.1	-6.22	0.66	-3.71	0.77	-9.93	0.84	1.04	0.1	0.19	0.02	1.23	0.1	-5.18	0.61	-3.52	0.75	-8.7	0.8	-12.26	2.36	0.71
	178	179	ASN	414	11.72	1.76	10.36	1.46	22.08	2.45	-1.01	0.56	-0.52	0.78	-1.52	1.08	-76.48	1.32	-2.86	1.8	-79.34	2.26	-65.77	1.95	6.99	2.2	-58.79	3.04	-9.75	1.12	-2.43	1.34	-12.18	1.78	0.6	0.09	0.11	0.02	0.71	0.1	-9.15	1.06	-2.32	1.33	-11.47	1.75	-74.92	1.5	4.67
	179	180	LYS	415	11.19	2.32	9.82	1.38	21.01	2.93	-1.75	0.77	-0.83	0.92	-2.58	1.32	-11.84	2.33	-3.88	1.19	-15.72	2.7	-2.4	3.36	5.11	1.85	2.72	3.79	-15.2	2.5	-4.77	0.7	-19.97	2.71	0.98	0.08	0.03	0.01	1.01	0.07	-14.23	2.48	-4.74	0.71	-18.96	2.68	-16.62	2.53	0.38
	180	181	PHE	416	8.02	1.87	9.96	1.26	17.98	2.24	-2.31	0.64	-1.2	0.57	-3.51	0.94	0.01	0.63	-11.01	1.18	-11.01	1.23	5.72	2.3	-2.25	1.75	3.46	2.91	-0.02	0.45	-3.03	1.04	-3.04	1.04	0.26	0.06	0.19	0.04	0.44	0.08	0.24	0.42	-2.84	1.01	-2.6	1	5.95	2.25	-5.09
	181	182	SER	417	3.08	0.85	9.92	1.3	13	1.65	-1.34	0.5	-0.59	0.99	-1.93	1.22	-2.04	1.77	-4.24	1.5	-6.28	2.74	-0.3	1.77	5.09	1.81	4.79	2.9	-2.5	1.41	-4.93	0.83	-7.42	1.94	0.28	0.05	0.04	0.01	0.32	0.05	-2.22	1.41	-4.88	0.83	-7.1	1.94	-2.52	0.99	0.21
	182	183	ILE	418	9.61	2.27	11.34	1.57	20.95	2.75	-1.99	1.13	-0.18	0.92	-2.17	1.61	-6.41	0.48	4.54	1.22	-1.88	1.43	1.21	2.52	15.69	1.76	16.91	3.15	4.58	0.33	-8.35	0.64	-3.77	0.75	0.19	0.05	0.01	0.01	0.2	0.05	4.77	0.32	-8.34	0.64	-3.57	0.73	5.98	2.39	7.35
	183	184	LYS	419	11.63	1.93	11.4	1.45	23.02	2.44	-4.09	1.01	-1.41	0.85	-5.49	1.42	-62.46	4.79	-8.94	1	-71.4	4.86	-54.92	5.11	1.05	1.66	-53.87	5.29	37.22	4.37	-3.96	0.63	33.26	4.38	0.38	0.04	0	0	0.38	0.04	37.6	4.37	-3.96	0.63	33.64	4.38	-17.32	2.32	-2.91
	184	185	SER	420	3.53	0.94	11.02	1.48	14.55	2.03	-2.04	0.92	-2.95	0.64	-4.99	1.2	-12.12	1.56	-14.08	0.88	-26.19	1.72	-10.62	1.39	-6.02	1.49	-16.64	2.2	4.05	0.39	-4.7	0.62	-0.65	0.54	0.01	0.01	0.01	0.01	0.03	0.01	4.06	0.38	-4.69	0.62	-0.62	0.53	-6.56	1.25	-10.7
	185	186	ASP	421	4.48	1.47	10.73	1.27	15.21	2.02	-4.3	0.74	-2.26	0.84	-6.56	1.07	5.67	2.37	-0.85	0.9	4.82	2.65	5.84	2.6	7.63	1.5	13.47	3.01	-62.81	2.11	-9.6	0.44	-72.41	2.28	0.01	0.01	0	0	0.02	0.01	-62.79	2.11	-9.6	0.44	-72.39	2.28	-56.95	1.35	-1.97
	186	187	VAL	422	5.89	1.36	11.36	1.33	17.24	1.97	-3.74	0.63	-1.83	0.83	-5.57	1.15	-21.67	0.42	-5.45	1.09	-27.12	1.12	-19.52	1.44	4.07	1.57	-15.45	2.09	6.71	0.26	-8.2	0.41	-1.49	0.37	0	0	0	0	0	0	6.71	0.26	-8.2	0.41	-1.49	0.37	-12.81	1.43	-4.13
	187	188	TRP	423	11.04	2.4	11.28	1.2	22.32	2.79	-10.42	0.73	-3.71	0.72	-14.13	1.08	5.67	0.81	-9.35	0.85	-3.68	1.01	6.29	2.59	-1.79	1.49	4.51	3.14	0.4	0.51	-3.01	0.46	-2.61	0.6	0.02	0.01	0	0	0.02	0.01	0.42	0.51	-3.01	0.46	-2.59	0.59	6.71	2.55	-4.8
	188	189	ALA	424	2.53	0.72	10.81	1.04	13.34	1.39	-2.05	0.34	-3.56	0.79	-5.6	0.87	2.17	0.11	-9.39	1	-7.22	1.02	2.65	0.78	-2.13	1.36	0.52	1.73	-0.2	0.06	-0.6	0.41	-0.8	0.44	0.04	0.01	0	0	0.04	0.01	-0.16	0.06	-0.6	0.41	-0.76	0.44	2.49	0.79	-2.73
	189	190	PHE	425	7.84	1.76	9.95	1.2	17.79	2.28	-4.46	0.74	-2.26	1.02	-6.72	1.23	0.26	0.31	-8.54	1.02	-8.27	1.07	3.64	2.02	-0.85	1.3	2.79	2.57	0.54	0.18	-2.22	0.39	-1.68	0.43	0	0	0	0	0	0	0.54	0.18	-2.22	0.39	-1.68	0.43	4.19	2.01	-3.07
	190	191	GLY	426	0	0	9.42	1.52	9.42	1.52	0	0	-5.13	0.71	-5.13	0.71	0	0	-7.78	1.07	-7.78	1.07	0	0	-3.49	1.67	-3.49	1.67	0	0	-1.31	0.5	-1.31	0.5	0	0	0	0	0	0	0	0	-1.31	0.5	-1.31	0.5	0	0	-4.8
	191	192	VAL	427	5.88	1.54	10.75	1.26	16.62	1.96	-3.67	0.86	-1.63	0.9	-5.3	1.37	-21.62	0.48	-5.69	0.94	-27.31	0.94	-19.41	1.75	3.43	1.42	-15.98	2.36	6.4	0.3	-7.47	0.49	-1.07	0.36	0	0	0	0	0	0	6.4	0.3	-7.47	0.49	-1.07	0.36	-13.01	1.7	-4.04
	192	193	LEU	428	9.64	1.84	11.75	1.38	21.39	2.32	-4.15	1.04	-2.02	0.96	-6.17	1.38	-28.79	0.33	-3.31	0.91	-32.1	0.94	-23.3	1.98	6.42	1.62	-16.89	2.52	4.82	0.19	-5.71	0.32	-0.89	0.3	0	0	0	0	0	0	4.82	0.19	-5.71	0.32	-0.89	0.3	-18.48	1.97	0.71
	193	194	LEU	429	8.46	1.67	11.11	1.39	19.58	2.35	-3.92	0.86	-2.32	0.77	-6.25	1.29	-28.25	0.36	-4.44	1.26	-32.69	1.21	-23.71	1.91	4.35	1.72	-19.36	2.69	4.68	0.2	-5.85	0.71	-1.18	0.61	0.02	0.01	0.01	0.01	0.02	0.01	4.69	0.2	-5.85	0.71	-1.15	0.61	-19.02	1.92	-1.5
	194	195	TRP	430	10.9	1.93	11.29	1.15	22.19	2.3	-8.92	0.87	-3.22	0.82	-12.15	1.31	5.22	1.29	-13.05	1.33	-7.83	1.99	7.2	2.42	-4.98	1.48	2.21	2.96	0.52	0.69	-2.65	0.37	-2.13	0.84	0.11	0.06	0	0	0.11	0.06	0.63	0.65	-2.65	0.37	-2.02	0.81	7.82	2.15	-7.63
	195	196	GLU	431	6.16	1.91	11.41	1.39	17.56	2.6	-5.46	0.94	-2.89	0.79	-8.35	1.34	12.46	2.8	-3.17	1.03	9.28	3.12	13.15	3.09	5.34	1.51	18.5	3.68	-66.66	2.56	-8.84	0.55	-75.5	2.82	0.01	0.01	0	0	0.01	0.01	-66.65	2.56	-8.84	0.55	-75.49	2.82	-53.5	1.99	-3.5
	196	197	ILE	432	9.41	2.13	11.48	1.28	20.89	2.63	-3.16	1.03	-1.4	0.94	-4.56	1.43	-7.69	0.3	-3.82	0.79	-11.5	0.85	-1.44	2.11	6.27	1.53	4.83	2.76	5.88	0.24	-7.72	0.6	-1.84	0.55	0.03	0.01	0	0	0.03	0.01	5.91	0.23	-7.72	0.6	-1.8	0.54	4.47	2.13	-1.45
	197	198	ALA	433	2.76	0.74	10.65	1.41	13.41	1.73	-1.7	0.31	-2.4	0.67	-4.1	0.78	2.4	0.13	-6.83	1.04	-4.43	1.02	3.46	0.85	1.42	1.64	4.88	1.79	-0.36	0.06	-2.53	0.51	-2.89	0.51	0.03	0.02	0.04	0.03	0.07	0.03	-0.33	0.07	-2.49	0.5	-2.82	0.51	3.13	0.83	-1.07
	198	199	THR	434	6.6	1.37	10.12	1.56	16.71	2.25	-2.76	0.78	-0.63	0.65	-3.4	1.07	-27.46	1.2	-9.15	1.04	-36.61	1.45	-23.63	1.65	0.33	1.74	-23.29	2.39	2.75	0.43	-5.74	0.82	-2.99	0.75	0.07	0.03	0.11	0.04	0.18	0.05	2.82	0.43	-5.63	0.79	-2.81	0.73	-20.8	1.59	-5.3
	199	200	TYR	435	8.35	1.98	9.47	1.34	17.82	2.53	-3.44	0.89	-1.92	0.67	-5.36	1.24	-18.31	0.78	-3.52	1.14	-21.83	1.32	-13.4	2.21	4.03	1.48	-9.37	2.72	-2.27	0.53	-4.94	0.88	-7.21	0.99	0.17	0.06	0.04	0.02	0.22	0.07	-2.1	0.52	-4.9	0.87	-6.99	0.97	-15.49	2.13	-0.87
	200	201	GLY	436	0	0	10.43	1.61	10.43	1.61	0	0	-2.27	0.99	-2.27	0.99	0	0	-16.69	2.11	-16.69	2.11	0	0	-8.53	2.41	-8.53	2.41	0	0	1.61	0.94	1.61	0.94	0	0	0.02	0.02	0.02	0.02	0	0	1.62	0.93	1.62	0.93	0	0	-6.91
	201	202	MET	437	7.37	1.72	9.79	1.35	17.17	2.19	-2.66	0.63	-1.57	0.73	-4.23	0.94	-2.14	0.85	-1.04	1.08	-3.18	1.62	2.57	2.02	7.19	1.62	9.76	2.67	1.37	0.61	-7.93	0.67	-6.56	1.02	0.69	0.09	0.04	0.02	0.73	0.08	2.06	0.62	-7.89	0.67	-5.82	1.05	4.63	1.86	-0.7
	202	203	SER	438	3.69	0.87	11.58	1.26	15.27	1.7	-1.19	0.55	-0.34	0.69	-1.54	0.95	-4.26	1.9	4.88	1.26	0.62	2.36	-1.76	1.91	16.12	1.66	14.36	2.73	-0.66	1.29	-7.08	1.06	-7.74	1.62	0.27	0.07	0.05	0.02	0.32	0.08	-0.4	1.25	-7.03	1.06	-7.42	1.59	-2.16	1.14	9.09
	203	204	PRO	439	12.42	1.7	13.16	1.3	25.58	2.31	-4.31	0.64	-2.17	0.91	-6.48	1.12	-11.56	0.98	3.14	3.52	-8.42	2.84	-3.45	2.19	14.13	3.6	10.68	3.59	10.85	0.87	-12.14	2.16	-1.29	1.57	0	0	0	0.01	0	0.01	10.85	0.87	-12.14	2.15	-1.29	1.57	7.41	1.92	1.99
	204	205	TYR	440	9.01	1.94	12.29	1.29	21.3	2.45	-3.73	0.7	-0.86	0.74	-4.59	1.1	-18.29	0.63	5.44	1.94	-12.85	1.77	-13.01	2.09	16.87	2.19	3.87	3.14	-1.43	0.49	-5.97	1.59	-7.41	1.43	0.02	0.01	0.03	0.02	0.05	0.02	-1.41	0.48	-5.95	1.58	-7.36	1.42	-14.42	2.16	10.93
	205	206	PRO	441	12.14	1.31	12.27	1.19	24.41	2.05	-1.58	0.48	-0.53	0.57	-2.11	0.8	-11.53	1.04	9	1.49	-2.53	1.09	-0.97	1.77	20.74	1.71	19.77	2.25	10.83	1.01	-17.24	1.27	-6.41	0.85	0.38	0.1	0.14	0.03	0.52	0.11	11.21	0.96	-17.1	1.25	-5.89	0.83	10.23	1.39	3.65
	206	207	GLY	442	0	0	9.6	1.53	9.6	1.53	0	0	-0.45	0.47	-0.45	0.47	0	0	-5.39	0.76	-5.39	0.76	0	0	3.76	1.48	3.76	1.48	0	0	-7.06	0.47	-7.06	0.47	0	0	0.68	0.02	0.68	0.02	0	0	-6.38	0.47	-6.38	0.47	0	0	-2.62
	207	208	ILE	443	9.24	2.13	9.67	1.36	18.91	2.64	-2.17	1.02	0.94	0.75	-1.23	1.36	-8.15	0.43	-4.6	1.17	-12.75	1.19	-1.08	2.24	6.02	1.71	4.94	2.64	5.82	0.37	-8.65	1.14	-2.84	1.09	0.25	0.06	0.17	0.04	0.41	0.06	6.06	0.35	-8.49	1.13	-2.43	1.08	4.98	2.2	-2.47
	208	209	ASP	444	4.13	1.34	9.65	1.23	13.78	1.87	-0.03	0.98	-0.87	0.72	-0.9	1.24	13.59	3.17	0.28	1.44	13.87	3.74	17.69	3.16	9.06	1.72	26.75	3.89	-81.17	3.05	-10.88	1.05	-92.05	3.61	0.53	0.03	0.08	0.02	0.61	0.04	-80.64	3.03	-10.8	1.03	-91.44	3.59	-62.95	1.43	-1.74
	209	210	LEU	445	9.05	1.87	11.15	1.24	20.19	2.32	-1.94	1.03	-1.04	0.79	-2.98	1.43	-27.72	0.56	-2.54	0.95	-30.26	1	-20.61	2.21	7.56	1.47	-13.05	2.62	3.92	0.35	-5.92	0.87	-2	0.86	0.21	0.08	0.04	0.02	0.25	0.09	4.13	0.37	-5.89	0.86	-1.75	0.81	-16.48	2.2	1.68
	210	211	SER	446	3.6	0.89	9.89	1.43	13.5	1.75	0.45	0.85	0.14	0.78	0.59	1.26	-9.27	1.18	-7.14	1.28	-16.41	1.85	-5.22	1.15	2.89	1.62	-2.32	2.04	1.39	0.64	-7.69	0.89	-6.3	1.2	0.44	0.04	0.19	0.05	0.64	0.06	1.84	0.63	-7.5	0.9	-5.66	1.2	-3.38	1.03	-4.61
	211	212	GLN	447	13.49	2.03	9.7	1.4	23.18	2.67	-2.29	0.74	-0.86	0.88	-3.15	1.23	-67.84	2.62	-4.8	1.2	-72.65	2.67	-56.65	3.02	4.04	1.51	-52.61	3.3	-6.32	1.78	-3.16	0.78	-9.48	1.72	0.61	0.06	0	0	0.61	0.06	-5.71	1.76	-3.16	0.78	-8.87	1.69	-62.36	2.26	0.88
	212	213	VAL	448	6.24	1.49	11.23	1.26	17.47	2.01	-3.11	0.65	-1.07	0.78	-4.18	1.13	-21.02	0.45	-5.46	1.1	-26.47	1.16	-17.89	1.58	4.71	1.35	-13.18	2.05	6.21	0.38	-8.31	0.57	-2.1	0.51	0	0	0	0	0.01	0.01	6.22	0.38	-8.31	0.57	-2.09	0.51	-11.67	1.51	-3.61
	213	214	TYR	449	9.19	1.84	10.76	1.24	19.95	2.09	-2.92	1.01	-1.81	0.73	-4.73	1.24	-18.16	2	-6.64	1.17	-24.8	2.61	-11.88	3.06	2.31	1.53	-9.58	3.45	-2.81	1.78	-5.57	0.86	-8.37	2.15	0.34	0.15	0.01	0.01	0.35	0.15	-2.46	1.7	-5.56	0.86	-8.02	2.07	-14.35	2.04	-3.25
	214	215	GLU	450	6.3	1.73	11.27	1.58	17.57	2.51	-1.29	0.71	-1.22	0.88	-2.52	1.2	38.9	5.94	-1.23	3.09	37.67	7.11	43.9	6.61	8.81	3.51	52.72	7.67	-101.42	5.93	-8.53	2.09	-109.95	6.8	0.71	0.08	0.03	0.03	0.74	0.09	-100.71	5.89	-8.5	2.09	-109.21	6.75	-56.81	1.79	0.31
	215	216	LEU	451	8.38	1.65	11.27	1.37	19.65	2.32	-2.02	0.81	-1.83	0.8	-3.85	1.33	-28.4	0.37	-1.13	1.07	-29.53	1.06	-22.04	1.85	8.31	1.55	-13.73	2.51	4.2	0.26	-6.19	0.7	-1.99	0.61	0.32	0.07	0.01	0.01	0.32	0.07	4.52	0.28	-6.19	0.7	-1.67	0.6	-17.52	1.84	2.12
	216	217	LEU	452	8.77	1.85	11.39	1.46	20.15	2.58	-3.13	0.96	-1.69	0.96	-4.83	1.35	-28.52	0.53	-6.34	1.31	-34.86	1.54	-22.89	2.05	3.35	1.59	-19.54	2.69	4.52	0.3	-6.63	0.83	-2.12	0.94	0.01	0.01	0	0	0.01	0.01	4.53	0.3	-6.63	0.83	-2.1	0.94	-18.36	2.04	-3.28
	217	218	GLU	453	6.91	2.06	11.01	1.36	17.91	2.65	-1.55	0.82	-0.41	0.68	-1.96	1.07	40.68	6.46	4.12	1.58	44.8	6.37	46.04	6.47	14.71	2.12	60.75	6.64	-102.79	6.01	-12.54	1.25	-115.33	6.04	0.64	0.09	0.17	0.04	0.81	0.09	-102.14	6.03	-12.37	1.26	-114.52	6.05	-56.1	2.06	2.34
	218	219	LYS	454	11.03	2.15	10.02	1.48	21.05	2.67	-0.53	1	0.62	0.84	0.09	1.42	-58.73	10.18	-7.36	0.8	-66.09	10.03	-48.23	10.04	3.28	1.61	-44.95	9.89	31.1	10.01	-5.37	0.58	25.73	9.78	0.95	0.09	0.24	0.02	1.19	0.09	32.05	9.93	-5.14	0.57	26.92	9.7	-16.18	2.48	-1.86
	219	220	ASP	455	4.77	1.78	10.95	1.61	15.72	2.61	0.09	0.96	-0.17	0.74	-0.08	1.37	15.92	5.13	-3.12	1.61	12.8	5.92	20.78	5.19	7.66	2.17	28.44	6.03	-83.05	4.81	-14.92	1.24	-97.97	5.49	0.58	0.05	0.1	0.02	0.68	0.07	-82.47	4.77	-14.82	1.23	-97.29	5.44	-61.69	1.61	-7.16
	220	221	TYR	456	8.47	1.81	9.28	1.01	17.75	2.27	-2.26	0.65	-1.14	0.91	-3.4	1.1	-16.59	0.66	-0.03	1.11	-16.62	1.21	-10.39	1.88	8.12	1.47	-2.27	2.51	-4.96	0.56	-3.9	0.65	-8.86	0.77	0.56	0.08	0.05	0.01	0.61	0.08	-4.4	0.53	-3.85	0.64	-8.25	0.74	-14.79	1.78	4.27
	221	222	ARG	457	14	2.98	10.17	1.51	24.16	3.37	-3.93	1.4	-1.1	0.63	-5.03	1.62	-250.01	5.06	0.41	0.66	-249.6	5.1	-239.95	4.96	9.48	1.49	-230.47	5.33	59.1	3.87	-7.85	0.54	51.25	3.87	0.39	0.07	0.11	0.02	0.5	0.08	59.49	3.85	-7.73	0.53	51.76	3.85	-180.46	2.77	1.74
	222	223	MET	458	6.68	1.69	9.49	1.21	16.17	2.23	-6.23	0.76	-1.19	0.77	-7.41	1.19	-2.01	0.65	-9.6	0.98	-11.62	1.18	-1.56	2.16	-1.3	1.47	-2.86	2.74	1.92	0.42	-5.82	0.82	-3.89	0.86	0.03	0.02	0.02	0.02	0.05	0.03	1.95	0.41	-5.79	0.81	-3.84	0.85	0.39	1.98	-7.1
	223	224	GLU	459	6.23	1.73	10.04	1.33	16.27	2.4	-0.76	0.48	-0.67	0.75	-1.43	0.95	41.69	2.43	6.28	1.17	47.97	2.52	47.16	2.9	15.65	1.84	62.81	3.43	-104.85	2.52	-9.73	0.8	-114.57	2.68	0.91	0.07	0.04	0.02	0.95	0.07	-103.94	2.51	-9.69	0.8	-113.63	2.67	-56.78	1.69	5.97
	224	225	ARG	460	13.94	2.84	12.13	1.4	26.07	3.31	-4.26	1.05	-0.4	0.57	-4.66	1.24	-217.89	5.08	12.3	1.12	-205.59	5.2	-208.21	5.7	24.03	1.72	-184.19	6	31.11	4.55	-9.38	1	21.73	4.57	0.71	0.06	0.12	0.03	0.83	0.06	31.82	4.52	-9.26	1.01	22.56	4.53	-176.39	2.67	14.77
	225	226	PRO	461	12.36	1.62	12.85	1.1	25.21	2.06	-3.73	0.61	-1.32	0.57	-5.05	0.78	-12.33	0.76	-2.2	1.33	-14.54	1.16	-3.7	1.98	9.33	1.64	5.63	2.37	11.53	0.68	-10.96	1.06	0.57	0.85	0.02	0.03	0.07	0.02	0.09	0.05	11.55	0.69	-10.89	1.05	0.66	0.83	7.85	1.76	-1.56
	226	227	GLU	462	6.44	1.87	8.98	1.24	15.42	2.33	0.2	0.58	-0.07	0.62	0.13	0.9	35.87	3.91	5.54	0.99	41.41	3.94	42.51	4.43	14.45	1.56	56.96	4.57	-99.92	3.92	-14.29	0.86	-114.21	4.09	1.03	0.09	0.17	0.04	1.2	0.1	-98.88	3.86	-14.13	0.85	-113.01	4.02	-56.37	2.05	0.32
	227	228	GLY	463	0	0	9.45	1.46	9.45	1.46	0	0	-1.06	0.5	-1.06	0.5	0	0	-6.76	1.01	-6.76	1.01	0	0	1.63	1.64	1.63	1.64	0	0	-5.65	0.75	-5.65	0.75	0	0	0.47	0.08	0.47	0.08	0	0	-5.19	0.76	-5.19	0.76	0	0	-3.55
	228	229	CYS	464	3.25	0.93	11.14	1.31	14.39	1.6	-3.63	0.38	0.64	0.88	-2.99	0.94	6.7	0.52	-4.24	1.28	2.46	1.25	6.32	1.11	7.54	1.87	13.86	2.07	-1.5	0.38	1.95	0.71	0.45	0.63	0.02	0.01	0.04	0.02	0.05	0.02	-1.49	0.39	1.99	0.71	0.5	0.63	4.83	1.04	9.53
	229	230	PRO	465	12.19	1.47	13.25	1.11	25.44	2.07	-1.88	0.65	-1.67	0.87	-3.55	0.98	-9.53	1.04	0.79	1.38	-8.74	1.53	0.79	1.88	12.37	1.64	13.16	2.5	9.14	1	-11.96	0.72	-2.81	0.97	0.35	0.07	0.06	0.02	0.41	0.07	9.49	0.98	-11.89	0.72	-2.4	0.96	10.28	1.65	0.48
	230	231	GLU	466	6.32	1.84	11.32	1.47	17.65	2.47	-0.92	0.67	-1.46	0.68	-2.38	0.99	22.45	4.41	3.21	1.96	25.66	5.45	27.85	4.61	13.07	1.98	40.92	5.37	-86.16	4.58	-9.13	1.45	-95.28	5.25	0.83	0.06	0.05	0.02	0.88	0.06	-85.32	4.55	-9.08	1.44	-94.4	5.22	-57.47	1.75	3.99
	231	232	LYS	467	11.58	2.14	11.19	1.51	22.77	2.62	-0.76	0.85	-1.54	0.74	-2.29	1.25	-65.61	14.77	-0.29	1.15	-65.9	14.79	-54.79	14.84	9.36	1.55	-45.43	14.59	35.9	13.36	-6.88	0.85	29.02	13.57	0.95	0.1	0.02	0.02	0.98	0.11	36.85	13.29	-6.86	0.85	30	13.49	-17.93	2.63	2.5
	232	233	VAL	468	6.13	1.65	11.16	1.48	17.28	2.3	-2.32	0.71	-1.4	0.87	-3.73	1.25	-21.13	0.52	-9.57	0.92	-30.71	1	-17.33	1.92	0.18	1.5	-17.15	2.46	5.92	0.39	-8.47	0.5	-2.55	0.52	0.08	0.03	0	0	0.08	0.03	6.01	0.37	-8.47	0.5	-2.46	0.5	-11.32	1.83	-8.29
	233	234	TYR	469	8.34	2.06	10.97	1.38	19.3	2.42	-4.48	0.68	-2.22	0.86	-6.7	1.1	-17.06	1	-11.79	1.1	-28.84	1.38	-13.2	2.4	-3.04	1.82	-16.24	3.01	-4.25	0.77	-2.37	0.6	-6.62	0.83	0.33	0.07	0	0	0.33	0.07	-3.92	0.78	-2.37	0.6	-6.29	0.84	-17.12	2.25	-5.4
	234	235	GLU	470	6.37	2.02	11.14	1.37	17.51	2.57	-1.55	0.81	-1.81	0.76	-3.36	1.26	14.83	9.39	-1.03	1.24	13.79	9.61	19.64	9.16	8.29	1.61	27.94	9.35	-77.63	8.89	-8.88	0.94	-86.51	9.1	0.56	0.1	0.03	0.02	0.59	0.1	-77.07	8.81	-8.85	0.94	-85.92	9.02	-57.43	2.05	-0.56
	235	236	LEU	471	8.67	1.89	11.62	1.49	20.29	2.64	-3.05	0.91	-1.29	0.93	-4.35	1.36	-28.38	0.39	-3.62	0.99	-32	1.06	-22.76	2.05	6.7	1.72	-16.05	2.93	4.81	0.22	-5.54	0.52	-0.72	0.55	0.11	0.04	0	0.01	0.12	0.04	4.93	0.22	-5.53	0.51	-0.61	0.55	-17.83	2.03	1.17
	236	237	MET	472	7.06	1.67	11.65	1.31	18.72	2.32	-7.27	0.85	-3.21	0.74	-10.48	1.16	-2.85	0.61	-0.38	1.03	-3.23	1.25	-3.07	1.89	8.07	1.7	5	2.58	2.77	0.46	-4.55	0.45	-1.78	0.65	0	0	0	0	0	0	2.77	0.46	-4.55	0.45	-1.78	0.65	-0.3	1.84	3.52
	237	238	ARG	473	13.43	2.82	11.45	1.36	24.88	3.5	-2.67	1.08	-2.31	0.63	-4.97	1.24	-210.14	11.25	-5.82	1.32	-215.95	11.32	-199.38	11.56	3.32	1.64	-196.05	11.89	24.33	9.75	-4.6	0.86	19.74	9.91	0.99	0.1	0.03	0.02	1.02	0.11	25.32	9.67	-4.57	0.86	20.76	9.83	-174.06	3.26	-1.24
	238	239	ALA	474	2.81	0.87	11.05	1.31	13.87	1.74	-1.37	0.3	-2.64	0.76	-4.01	0.85	2.31	0.11	-13.3	0.92	-10.99	0.94	3.75	0.89	-4.88	1.53	-1.13	1.87	-0.17	0.06	-0.29	0.55	-0.46	0.55	0.18	0.03	0.04	0.02	0.22	0.03	0.01	0.07	-0.25	0.55	-0.24	0.55	3.76	0.88	-5.14
	239	240	CYS	475	3.31	0.94	10.82	1.12	14.13	1.46	-3.81	0.68	-3.43	0.75	-7.24	1.06	5.94	0.55	-9.81	0.92	-3.87	1.04	5.44	1.12	-2.42	1.41	3.03	1.82	-1.79	0.19	1.42	0.44	-0.37	0.51	0	0	0	0	0	0	-1.79	0.19	1.42	0.44	-0.37	0.51	3.65	1.1	-0.99
	240	241	TRP	476	11.58	2.29	10.59	1.4	22.17	2.68	-9.78	0.71	-1.43	0.92	-11.21	1.18	6.91	0.5	-12.27	1.75	-5.36	1.87	8.71	2.38	-3.12	2	5.59	2.93	0.88	0.38	-0.85	0.56	0.03	0.69	0.02	0.01	0	0	0.02	0.01	0.9	0.38	-0.85	0.56	0.05	0.69	9.61	2.41	-3.97
	241	242	GLN	477	13.95	1.96	10.09	1.18	24.04	2.34	-3.01	0.76	-1.57	0.87	-4.58	1.26	-72.68	3.72	-8.02	1.21	-80.7	3.44	-61.74	3.54	0.5	1.54	-61.24	3.5	-3.06	2.41	-1.87	0.49	-4.93	2.34	0.51	0.04	0	0	0.52	0.04	-2.55	2.4	-1.87	0.49	-4.42	2.33	-64.29	1.9	-1.37
	242	243	TRP	478	11.27	2.33	11.72	1.28	22.99	2.76	-4.36	0.7	-2.18	0.61	-6.54	0.84	10.3	0.75	-6.3	1.38	4	1.48	17.21	2.58	3.24	1.73	20.45	3.11	-4.95	0.76	-3.97	0.73	-8.92	1.05	0.68	0.08	0.04	0.01	0.72	0.08	-4.27	0.72	-3.92	0.72	-8.19	1.01	12.94	2.55	-0.69
	243	244	ASN	479	11.32	1.92	11.9	1.42	23.21	2.57	-1.85	0.6	-0.59	0.66	-2.44	1.02	-81.47	2.07	2.35	1.52	-79.12	2.91	-72	2.66	13.66	2.04	-58.35	3.8	-5.15	1.73	-4.18	0.76	-9.33	2.09	0.56	0.03	0.05	0.01	0.61	0.03	-4.59	1.71	-4.13	0.76	-8.72	2.08	-76.59	1.74	9.53
	244	245	PRO	480	12.08	1.41	13.94	1.23	26.02	1.95	-2.82	0.53	-2.69	0.72	-5.51	0.91	-6.7	0.98	-1.32	1.7	-8.03	1.55	2.56	1.82	9.92	2.17	12.48	2.65	6.29	0.89	-9.37	0.99	-3.08	0.86	0.28	0.05	0	0	0.29	0.05	6.58	0.9	-9.37	0.99	-2.79	0.88	9.13	1.57	0.56
	245	246	SER	481	3.65	0.98	10.19	1.27	13.83	1.73	-0.66	0.38	-0.26	0.8	-0.92	0.95	-2.82	0.79	-6.4	1.24	-9.22	1.6	0.16	1.26	3.52	1.7	3.68	2.37	-2.18	0.55	-8.76	1.08	-10.94	1.27	0.51	0.03	0.21	0.04	0.72	0.04	-1.67	0.55	-8.55	1.06	-10.22	1.25	-1.51	1.18	-5.03
	246	247	ASP	482	4.44	1.32	10.41	1.59	14.85	1.95	-1.16	0.72	-0.69	0.75	-1.85	1.05	23.98	5.95	9.77	1.09	33.75	6.49	27.27	6.04	19.49	1.73	46.75	6.5	-89.67	5.74	-16.25	0.97	-105.92	6.17	0.49	0.05	0.15	0.03	0.64	0.05	-89.18	5.71	-16.09	0.95	-105.27	6.14	-61.92	1.23	3.4
	247	248	ARG	483	12.63	2.28	11.36	1.5	23.99	3	-7.71	1.46	-0.21	0.96	-7.91	1.72	-245.78	3.93	2.82	2.09	-242.96	4.27	-240.86	4.05	13.98	2.17	-226.88	4.51	52.33	2.99	-2.21	1.21	50.12	3.19	0	0	0.02	0.02	0.02	0.02	52.33	2.99	-2.18	1.2	50.14	3.19	-188.53	2.6	11.79
	248	249	PRO	484	12.24	1.57	12.78	1.23	25.02	2.22	-3.03	0.67	-2.11	0.64	-5.14	0.9	-14.71	0.85	1.65	1.51	-13.06	1.41	-5.5	1.84	12.33	1.76	6.83	2.47	14.11	0.78	-12.35	1.13	1.75	1.03	0.14	0.03	0.04	0.02	0.18	0.04	14.25	0.77	-12.31	1.13	1.94	1.01	8.75	1.64	0.02
	249	250	SER	485	3.44	1.06	9.9	1.23	13.34	1.89	-0.9	0.83	-1.69	0.9	-2.59	1.25	-8.14	2.41	-9.03	1.51	-17.18	3.29	-5.61	2.22	-0.82	1.9	-6.43	3.32	1.71	1.36	-4.59	0.69	-2.88	1.78	0.18	0.03	0	0.01	0.18	0.04	1.89	1.34	-4.59	0.69	-2.69	1.75	-3.72	1.4	-5.41
	250	251	PHE	486	8.62	2.05	11.15	1.52	19.77	2.46	-5.23	0.77	-2.36	0.75	-7.6	1.09	-0.52	0.26	-9.43	1.25	-9.96	1.28	2.87	2.34	-0.65	1.76	2.21	2.86	1.08	0.19	-2.93	0.73	-1.85	0.76	0	0.01	0	0	0	0.01	1.08	0.19	-2.93	0.73	-1.85	0.76	3.94	2.31	-3.58
	251	252	ALA	487	2.7	0.86	11.18	1.32	13.88	1.66	-1	0.2	-2.2	0.72	-3.21	0.71	2.4	0.16	-9.2	1.34	-6.8	1.36	4.1	0.88	-0.22	1.64	3.88	1.97	-0.46	0.1	-2.39	0.86	-2.85	0.93	0.3	0.03	0.03	0.02	0.34	0.04	-0.15	0.1	-2.36	0.86	-2.51	0.91	3.94	0.88	-2.58
	252	253	GLU	488	6.15	1.67	11.04	1.29	17.19	2.24	-1.01	1	-1.68	0.66	-2.7	1.26	34.12	6.97	2.88	1.2	37	7.14	39.27	7.06	12.23	1.79	51.5	7.63	-97.21	6.32	-12.57	0.9	-109.79	6.62	0.68	0.06	0.04	0.02	0.72	0.06	-96.54	6.28	-12.53	0.88	-109.07	6.59	-57.27	1.99	-0.3
	253	254	ILE	489	10.13	1.98	11.55	1.29	21.68	2.38	-3.36	0.91	-1.14	0.85	-4.5	1.43	-8.31	0.34	-2.55	1.05	-10.86	1.12	-1.54	2	7.85	1.65	6.32	2.74	6.71	0.3	-7.55	0.57	-0.84	0.58	0.02	0.01	0	0	0.02	0.01	6.72	0.3	-7.55	0.57	-0.82	0.58	5.19	2.03	0.31
	254	255	HIS	490	24.76	1.65	11.09	1.51	35.85	2.24	-7.13	0.78	-2.07	0.91	-9.19	1.19	-7.3	2.79	-9.61	1.55	-16.91	3.39	10.33	2.95	-0.58	1.56	9.75	3.33	-6.07	2.09	-4.13	0.96	-10.2	2.34	0.2	0.06	0	0	0.2	0.06	-5.87	2.09	-4.13	0.96	-9.99	2.33	4.47	1.79	-4.71
	255	256	GLN	491	13.69	1.93	11.02	1.19	24.71	2.51	-1.05	0.67	-0.92	1.01	-1.97	1.33	-65.02	1.71	-9.68	1.83	-74.69	2.51	-52.38	2.13	0.43	1.9	-51.95	3.15	-9.24	1.27	-3.96	0.88	-13.2	1.37	0.93	0.05	0.03	0.02	0.97	0.06	-8.31	1.26	-3.93	0.87	-12.24	1.36	-60.69	1.78	-3.5
	256	257	ALA	492	2.87	1.01	11.13	1.33	14	1.75	-1.29	0.31	-2.28	0.79	-3.57	0.85	2.33	0.13	-9.19	1.21	-6.87	1.24	3.91	1.09	-0.35	1.59	3.57	2.03	-0.32	0.06	-0.35	0.77	-0.67	0.78	0.16	0.04	0.06	0.02	0.22	0.03	-0.16	0.07	-0.3	0.76	-0.45	0.78	3.76	1.08	-0.64
	257	258	PHE	493	8.84	2.11	12.15	1.44	20.99	2.52	-4.87	0.75	-2.39	0.84	-7.26	1.17	-0.44	0.38	-10.6	1.39	-11.04	1.44	3.54	2.45	-0.84	1.83	2.69	3.04	0.92	0.21	-2.18	0.82	-1.26	0.87	0	0	0	0	0	0	0.92	0.21	-2.18	0.82	-1.26	0.87	4.45	2.43	-3.02
	258	259	GLU	494	6.57	1.82	10.89	1.36	17.47	2.4	-2.22	0.62	-1.39	0.76	-3.61	1.1	61.13	4.08	1.2	2	62.33	4.72	65.49	4.52	10.7	2.28	76.19	5.33	-122.13	4.31	-13.98	1.4	-136.12	4.65	0.61	0.09	0.04	0.03	0.64	0.1	-121.52	4.33	-13.95	1.38	-135.47	4.67	-56.04	1.85	-3.25
	259	260	THR	495	6.61	1.76	10.93	1.37	17.53	2.21	-0.21	0.79	-0.3	0.91	-0.51	1.29	-27.24	1.97	-5.67	2.24	-32.91	2.65	-20.85	2.16	4.96	2.59	-15.88	2.89	2.37	1.25	-8.72	2.02	-6.35	2.12	0.57	0.05	0.08	0.05	0.65	0.08	2.94	1.24	-8.64	2.01	-5.69	2.1	-17.91	1.58	-3.67
	260	261	MET	496	7.38	1.87	10.69	1.41	18.07	2.31	-5.03	0.75	-0.63	0.71	-5.66	1.07	-4.79	0.89	-2.87	1.72	-7.66	1.63	-2.44	2.24	7.2	2.21	4.75	2.75	4.33	0.8	-8.04	1.58	-3.71	1.48	0.16	0.06	0.19	0.04	0.35	0.07	4.48	0.79	-7.85	1.57	-3.36	1.45	2.04	1.98	-0.65
	261	262	PHE	497	8.12	2.1	10.79	1.39	18.91	2.48	-0.58	1.07	-0.59	0.84	-1.17	1.58	0.56	0.56	0.61	1.48	1.17	1.47	8.09	2.22	10.81	1.79	18.91	2.95	-0.96	0.51	-6.18	0.96	-7.14	1.12	0.56	0.15	0.13	0.05	0.69	0.16	-0.4	0.43	-6.05	0.97	-6.45	1.1	7.7	2.22	4.76
	262	263	GLN	498	14.06	2.38	6.69	1.22	20.74	2.99	-1.26	0.78	0.34	0.52	-0.92	0.95	16.97	10.51	-12.12	3.74	4.85	7.15	29.77	10.8	-5.09	4.13	24.68	7.56	-219.21	9.59	73.79	3.35	-145.43	6.48	1.39	0.08	0.09	0.02	1.48	0.08	-217.82	9.62	73.88	3.34	-143.94	6.52	-188.05	2.47	68.79
=>>	LIGAND
	Number	Residue	Residue Name	Residue ID	SINT		BINT		TINT		SVDW		BVDW		TVDW		SELE		BELE		TELE		SGAS		BGAS		TGAS		SGB		BGB		TGB		SGBSUR		BGBSUR		TGBSUR		SGBSOL		BGBSOL		TGBSOL		SGBTOT		BGBTOT
	0	264	LIG	499	25.27	3.39	0	0	25.27	3.39	1.46	1.36	0	0	1.46	1.36	-1.79	1.62	0	0	-1.79	1.62	24.94	3.53	0	0	24.94	3.53	-63.04	1.5	0	0	-63.04	1.5	2.61	0.02	0	0	2.61	0.02	-60.44	1.5	0	0	-60.44	1.5	-35.5	3.49	0
=>>	DELTA
	Number	Residue	Residue Name	Residue ID	SINT		BINT		TINT		SVDW		BVDW		TVDW		SELE		BELE		TELE		SGAS		BGAS		TGAS		SGB		BGB		TGB		SGBSUR		BGBSUR		TGBSUR		SGBSOL		BGBSOL		TGBSOL		SGBTOT		BGBTOT
	0	1	TRP	235	0	0	0	0	0	0	0	0	0	0	0	0	10.07	0.57	0.42	0.05	10.5	0.58	10.07	0.57	0.42	0.05	10.49	0.58	-9.91	0.56	-0.41	0.05	-10.33	0.57	0	0	0	0	0	0	-9.91	0.56	-0.41	0.05	-10.33	0.57	0.16	0.01	0.01
	1	2	GLU	236	0	0	0	0	0	0	0	0	0	0	0	0	-7.63	0.26	-1.01	0.08	-8.64	0.26	-7.63	0.26	-1.01	0.08	-8.64	0.26	7.54	0.25	1	0.08	8.54	0.26	0	0	0	0	0	0	7.54	0.25	1	0.08	8.54	0.26	-0.09	0	-0.01
	2	3	MET	237	0	0	0	0	0	0	0	0	0	0	0	0	0.38	0.11	-0.61	0.07	-0.23	0.14	0.38	0.11	-0.61	0.07	-0.23	0.14	-0.37	0.11	0.6	0.07	0.23	0.14	0	0	0	0	0	0	-0.37	0.11	0.6	0.07	0.23	0.14	0.01	0	-0.01
	3	4	GLU	238	0	0	0	0	0	0	0	0	0	0	0	0	-6.73	0.23	-1.28	0.06	-8	0.24	-6.73	0.23	-1.28	0.06	-8.01	0.24	6.65	0.23	1.26	0.06	7.91	0.24	0	0	0	0	0	0	6.65	0.23	1.26	0.06	7.91	0.24	-0.08	0	-0.02
	4	5	ARG	239	0	0	0	0	0	0	0	0	0	0	0	0	8.92	0.55	-0.44	0.05	8.48	0.56	8.92	0.55	-0.44	0.05	8.47	0.56	-8.8	0.55	0.44	0.05	-8.36	0.55	0	0	0	0	0	0	-8.8	0.55	0.44	0.05	-8.36	0.55	0.12	0.01	0
	5	6	THR	240	0	0	0	0	0	0	0	0	0	0	0	0	0.33	0.06	-0.37	0.04	-0.04	0.07	0.33	0.06	-0.37	0.04	-0.04	0.07	-0.32	0.06	0.36	0.04	0.04	0.07	0	0	0	0	0	0	-0.32	0.06	0.36	0.04	0.04	0.07	0.01	0	0
	6	7	ASP	241	0	0	0	0	0	0	0	0	0	0	0	0	-7.02	0.23	-1.21	0.06	-8.23	0.27	-7.02	0.23	-1.21	0.06	-8.23	0.27	6.94	0.23	1.19	0.06	8.14	0.26	0	0	0	0	0	0	6.94	0.23	1.19	0.06	8.14	0.26	-0.08	0	-0.01
	7	8	ILE	242	0	0	0	0	0	0	0	0	0	0	-0.01	0	0.95	0.04	-0.66	0.06	0.29	0.06	0.95	0.03	-0.66	0.06	0.28	0.06	-0.94	0.04	0.66	0.06	-0.28	0.06	0	0	0	0	0	0	-0.94	0.04	0.66	0.06	-0.28	0.06	0.01	0	0
	8	9	THR	243	0	0	0	0	0	0	0	0	0	0	0	0	0.5	0.08	-0.65	0.08	-0.15	0.11	0.5	0.08	-0.65	0.08	-0.15	0.11	-0.49	0.08	0.64	0.07	0.15	0.11	0	0	0	0	0	0	-0.49	0.08	0.64	0.07	0.15	0.11	0.01	0	-0.01
	9	10	MET	244	0	0	0	0	0	0	-0.01	0	0	0	-0.01	0	0.32	0.14	-0.17	0.03	0.15	0.15	0.31	0.14	-0.17	0.03	0.14	0.15	-0.31	0.14	0.18	0.03	-0.14	0.15	0	0	0	0	0	0	-0.31	0.14	0.18	0.03	-0.14	0.15	0	0	0
	10	11	LYS	245	0	0	0	0	0	0	0	0	0	0	0	0	8.87	0.55	0.13	0.03	9	0.56	8.87	0.55	0.13	0.03	9	0.56	-8.75	0.54	-0.12	0.03	-8.87	0.55	0	0	0	0	0	0	-8.75	0.54	-0.12	0.03	-8.87	0.55	0.12	0.01	0.01
	11	12	HIS	246	0	0	0	0	0	0	0	0	0	0	-0.01	0	0.22	0.12	-0.7	0.06	-0.48	0.13	0.21	0.12	-0.7	0.06	-0.49	0.13	-0.21	0.12	0.69	0.06	0.48	0.13	0	0	0	0	0	0	-0.21	0.12	0.69	0.06	0.48	0.13	0.01	0	-0.01
	12	13	LYS	247	0	0	0	0	0	0	-0.01	0	-0.01	0	-0.01	0	10.78	0.59	0.18	0.06	10.96	0.62	10.78	0.58	0.17	0.06	10.95	0.62	-10.63	0.57	-0.19	0.06	-10.82	0.61	0	0	0	0	0	0	-10.63	0.57	-0.19	0.06	-10.82	0.61	0.15	0.01	-0.02
	13	14	LEU	248	0	0	0	0	0	0	-0.35	0.14	-0.02	0.01	-0.37	0.15	1.34	0.1	-0.79	0.11	0.55	0.15	0.99	0.15	-0.81	0.11	0.18	0.17	-1.29	0.09	0.77	0.11	-0.52	0.15	-0.04	0.02	0	0	-0.04	0.02	-1.33	0.1	0.77	0.11	-0.55	0.16	-0.34	0.15	-0.03
	14	15	GLY	249	0	0	0	0	0	0	0	0	-0.01	0	-0.01	0	0	0	0.03	0.08	0.03	0.08	0	0	0.03	0.08	0.03	0.08	0	0	-0.02	0.08	-0.02	0.08	0	0	0	0	0	0	0	0	-0.02	0.08	-0.02	0.08	0	0	0.01
	15	16	GLY	250	0	0	0	0	0	0	0	0	0	0	0	0	0	0	0.23	0.05	0.23	0.05	0	0	0.23	0.05	0.23	0.05	0	0	-0.22	0.05	-0.22	0.05	0	0	0	0	0	0	0	0	-0.22	0.05	-0.22	0.05	0	0	0.01
	16	17	GLY	251	0	0	0	0	0	0	0	0	0	0	0	0	0	0	0.26	0.18	0.26	0.18	0	0	0.26	0.18	0.26	0.18	0	0	-0.25	0.17	-0.25	0.17	0	0	0	0	0	0	0	0	-0.25	0.17	-0.25	0.17	0	0	0.01
	17	18	GLN	252	0	0	0	0	0	0	-0.01	0	-0.01	0	-0.01	0	0.41	0.33	-0.33	0.11	0.07	0.34	0.4	0.33	-0.34	0.11	0.06	0.34	-0.39	0.33	0.33	0.11	-0.06	0.34	0	0	0	0	0	0	-0.39	0.33	0.33	0.11	-0.06	0.34	0.01	0	-0.01
	18	19	TYR	253	0	0	0	0	0	0	-0.13	0.07	-0.03	0.02	-0.16	0.09	0.38	0.12	-1.07	0.22	-0.69	0.21	0.25	0.14	-1.11	0.23	-0.85	0.24	-0.24	0.13	1.11	0.23	0.87	0.23	0	0	0	0	0	0	-0.24	0.13	1.11	0.23	0.87	0.23	0.02	0.06	0.01
	19	20	GLY	254	0	0	0	0	0	0	0	0	-0.01	0.01	-0.01	0.01	0	0	-0.13	0.12	-0.13	0.12	0	0	-0.14	0.11	-0.14	0.11	0	0	0.14	0.11	0.14	0.11	0	0	0	0	0	0	0	0	0.14	0.11	0.14	0.11	0	0	-0.01
	20	21	GLU	255	0	0	0	0	0	0	-0.01	0	-0.03	0.01	-0.03	0.01	-9.65	0.52	-2.16	0.26	-11.81	0.71	-9.66	0.52	-2.19	0.26	-11.85	0.71	9.55	0.52	2.16	0.27	11.7	0.71	0	0	0	0	0	0	9.55	0.52	2.16	0.27	11.7	0.71	-0.11	0.01	-0.03
	21	22	VAL	256	0	0	0	0	0	0	-0.52	0.34	-0.09	0.03	-0.61	0.35	2.14	0.19	-1.16	0.16	0.97	0.3	1.61	0.48	-1.25	0.17	0.37	0.6	-2.11	0.18	1.09	0.13	-1.02	0.25	-0.08	0.02	0	0	-0.08	0.02	-2.19	0.18	1.09	0.13	-1.1	0.25	-0.58	0.34	-0.16
	22	23	TYR	257	0	0	0	0	0	0	-0.02	0	-0.09	0.03	-0.11	0.04	0.27	0.04	-1.39	0.22	-1.12	0.21	0.25	0.04	-1.48	0.24	-1.23	0.23	-0.25	0.04	1.42	0.2	1.17	0.18	0	0	0	0	0	0	-0.25	0.04	1.42	0.2	1.17	0.18	0	0.01	-0.06
	23	24	GLU	258	0	0	0	0	0	0	-0.01	0	-0.02	0.01	-0.03	0.01	-10.04	0.48	-1.41	0.13	-11.44	0.53	-10.05	0.48	-1.42	0.13	-11.47	0.54	9.94	0.48	1.42	0.13	11.36	0.53	0	0	0	0	0	0	9.94	0.48	1.42	0.13	11.36	0.53	-0.11	0.01	0
	24	25	GLY	259	0	0	0	0	0	0	0	0	-0.01	0	-0.01	0	0	0	-0.15	0.08	-0.15	0.08	0	0	-0.16	0.08	-0.16	0.08	0	0	0.16	0.08	0.16	0.08	0	0	0	0	0	0	0	0	0.16	0.08	0.16	0.08	0	0	0
	25	26	VAL	260	0	0	0	0	0	0	0	0	0	0	0	0	1	0.02	-1.04	0.06	-0.04	0.06	1	0.02	-1.04	0.06	-0.04	0.06	-0.99	0.02	1.03	0.06	0.04	0.06	0	0	0	0	0	0	-0.99	0.02	1.03	0.06	0.04	0.06	0.01	0	-0.01
	26	27	TRP	261	0	0	0	0	0	0	0	0	0	0	0	0	0.17	0.05	-0.2	0.05	-0.03	0.07	0.17	0.05	-0.2	0.05	-0.03	0.07	-0.17	0.05	0.2	0.05	0.03	0.06	0	0	0	0	0	0	-0.17	0.05	0.2	0.05	0.03	0.06	0	0	0
	27	28	LYS	262	0	0	0	0	0	0	0	0	0	0	0	0	7.59	0.26	-0.07	0.03	7.52	0.27	7.59	0.26	-0.07	0.03	7.52	0.27	-7.49	0.26	0.07	0.03	-7.42	0.27	0	0	0	0	0	0	-7.49	0.26	0.07	0.03	-7.42	0.27	0.1	0	0
	28	29	LYS	263	0	0	0	0	0	0	0	0	0	0	0	0	7.75	0.39	0.01	0.02	7.76	0.4	7.75	0.39	0.01	0.02	7.76	0.4	-7.65	0.39	-0.01	0.02	-7.66	0.4	0	0	0	0	0	0	-7.65	0.39	-0.01	0.02	-7.66	0.4	0.1	0.01	0
	29	30	TYR	264	0	0	0	0	0	0	0	0	0	0	0	0	0.16	0.02	-0.15	0.04	0.01	0.04	0.16	0.02	-0.15	0.04	0.01	0.04	-0.16	0.02	0.15	0.04	-0.01	0.04	0	0	0	0	0	0	-0.16	0.02	0.15	0.04	-0.01	0.04	0	0	0
	30	31	SER	265	0	0	0	0	0	0	0	0	0	0	0	0	0.44	0.05	-0.39	0.05	0.05	0.07	0.44	0.05	-0.39	0.05	0.05	0.07	-0.43	0.05	0.39	0.05	-0.04	0.07	0	0	0	0	0	0	-0.43	0.05	0.39	0.05	-0.04	0.07	0.01	0	0
	31	32	LEU	266	0	0	0	0	0	0	0	0	0	0	0	0	0.75	0.03	-0.79	0.06	-0.04	0.06	0.75	0.03	-0.8	0.06	-0.04	0.06	-0.74	0.03	0.78	0.06	0.04	0.06	0	0	0	0	0	0	-0.74	0.03	0.78	0.06	0.04	0.06	0.01	0	-0.01
	32	33	THR	267	0	0	0	0	0	0	0	0	0	0	-0.01	0	0.69	0.12	-0.7	0.07	-0.01	0.14	0.69	0.12	-0.71	0.07	-0.02	0.14	-0.68	0.12	0.68	0.07	0	0.14	0	0	0	0	0	0	-0.68	0.12	0.68	0.07	0	0.14	0.01	0	-0.03
	33	34	VAL	268	0	0	0	0	0	0	-0.01	0	-0.03	0.01	-0.04	0.01	1.49	0.07	-0.9	0.12	0.59	0.18	1.48	0.07	-0.93	0.13	0.55	0.18	-1.52	0.06	0.82	0.1	-0.7	0.14	0	0	0	0	0	0	-1.52	0.06	0.82	0.1	-0.7	0.14	-0.04	0.02	-0.12
	34	35	ALA	269	0	0	0	0	0	0	-0.28	0.17	-0.31	0.12	-0.59	0.18	0.07	0.08	0.17	0.59	0.24	0.57	-0.21	0.19	-0.14	0.6	-0.35	0.57	-0.04	0.06	-0.09	0.53	-0.14	0.51	-0.06	0.02	0	0	-0.07	0.02	-0.1	0.06	-0.1	0.52	-0.2	0.51	-0.31	0.16	-0.24
	35	36	VAL	270	0	0	0	0	0	0	-0.05	0.02	-0.41	0.16	-0.46	0.18	1.85	0.14	-1.54	0.36	0.3	0.38	1.79	0.13	-1.95	0.47	-0.16	0.47	-1.88	0.1	1.61	0.35	-0.27	0.3	0	0	-0.01	0.01	-0.01	0.01	-1.88	0.1	1.61	0.35	-0.28	0.3	-0.09	0.05	-0.34
	36	37	LYS	271	0	0	0	0	0	0	-1.06	0.27	-0.33	0.1	-1.39	0.31	29.13	1.97	-0.5	0.36	28.64	1.9	28.07	1.87	-0.83	0.35	27.25	1.79	-28.37	1.82	0.47	0.22	-27.9	1.8	-0.17	0.03	-0.01	0.01	-0.18	0.03	-28.54	1.82	0.47	0.22	-28.08	1.8	-0.47	0.34	-0.36
	37	38	THR	272	0	0	0	0	0	0	-0.01	0	-0.03	0.01	-0.05	0.01	1.09	0.32	-1.5	0.18	-0.4	0.32	1.08	0.32	-1.53	0.18	-0.45	0.32	-1.09	0.32	1.52	0.16	0.43	0.33	0	0	0	0	0	0	-1.09	0.32	1.52	0.16	0.43	0.33	-0.01	0.01	-0.01
	38	39	LEU	273	0	0	0	0	0	0	-0.01	0	0	0	-0.01	0	1	0.05	-1.11	0.07	-0.11	0.06	0.99	0.05	-1.12	0.07	-0.12	0.06	-0.99	0.05	1.12	0.07	0.13	0.06	0	0	0	0	0	0	-0.99	0.05	1.12	0.07	0.13	0.06	0.01	0	0
	39	40	LYS	274	0	0	0	0	0	0	0	0	0	0	0	0	8.81	0.64	-0.14	0.04	8.67	0.65	8.81	0.64	-0.14	0.04	8.66	0.65	-8.69	0.63	0.15	0.04	-8.55	0.64	0	0	0	0	0	0	-8.69	0.63	0.15	0.04	-8.55	0.64	0.12	0.01	0
	40	41	ASP	276	0	0	0	0	0	0	0	0	0	0	0	0	-7.44	0.21	-1.08	0.05	-8.52	0.23	-7.44	0.21	-1.08	0.05	-8.52	0.23	7.35	0.21	1.07	0.04	8.42	0.23	0	0	0	0	0	0	7.35	0.21	1.07	0.04	8.42	0.23	-0.09	0	-0.01
	41	42	THR	277	0	0	0	0	0	0	0	0	0	0	0	0	0.33	0.1	-0.19	0.02	0.15	0.1	0.33	0.1	-0.19	0.02	0.15	0.1	-0.33	0.1	0.19	0.02	-0.14	0.1	0	0	0	0	0	0	-0.33	0.1	0.19	0.02	-0.14	0.1	0.01	0	0
	42	43	MET	278	0	0	0	0	0	0	0	0	0	0	0	0	0.44	0.09	-0.16	0.02	0.28	0.09	0.43	0.09	-0.16	0.02	0.28	0.09	-0.43	0.08	0.16	0.02	-0.27	0.09	0	0	0	0	0	0	-0.43	0.08	0.16	0.02	-0.27	0.09	0.01	0	0
	43	44	GLU	279	0	0	0	0	0	0	0	0	0	0	0	0	-7.7	0.35	-1.4	0.08	-9.1	0.39	-7.7	0.35	-1.4	0.08	-9.1	0.39	7.61	0.35	1.38	0.08	8.99	0.39	0	0	0	0	0	0	7.61	0.35	1.38	0.08	8.99	0.39	-0.09	0	-0.01
	44	45	VAL	280	0	0	0	0	0	0	0	0	0	0	0	0	1.09	0.04	-1.54	0.07	-0.45	0.05	1.09	0.04	-1.54	0.07	-0.45	0.05	-1.08	0.04	1.52	0.07	0.44	0.05	0	0	0	0	0	0	-1.08	0.04	1.52	0.07	0.44	0.05	0.01	0	-0.02
	45	46	GLU	281	0	0	0	0	0	0	0	0	0	0	0	0	-7.49	0.31	-1.63	0.09	-9.12	0.38	-7.49	0.31	-1.63	0.09	-9.12	0.39	7.4	0.31	1.61	0.09	9.01	0.38	0	0	0	0	0	0	7.4	0.31	1.61	0.09	9.01	0.38	-0.09	0	-0.02
	46	47	GLU	282	0	0	0	0	0	0	0	0	-0.01	0	-0.01	0	-10.74	0.93	-2.21	0.2	-12.94	0.95	-10.74	0.93	-2.21	0.21	-12.95	0.95	10.62	0.92	2.18	0.21	12.81	0.95	0	0	0	0	0	0	10.62	0.92	2.18	0.21	12.81	0.95	-0.12	0.01	-0.03
	47	48	PHE	283	0	0	0	0	0	0	-0.04	0.01	-0.01	0	-0.05	0.01	0.19	0.1	-0.99	0.13	-0.8	0.19	0.15	0.1	-1	0.13	-0.85	0.19	-0.09	0.11	0.99	0.13	0.9	0.2	0	0	0	0	0	0	-0.09	0.11	0.99	0.13	0.9	0.2	0.06	0.02	-0.01
	48	49	LEU	284	0	0	0	0	0	0	0	0	0	0	-0.01	0	0.82	0.03	-1.23	0.12	-0.41	0.11	0.82	0.03	-1.24	0.13	-0.42	0.11	-0.81	0.03	1.23	0.12	0.42	0.11	0	0	0	0	0	0	-0.81	0.03	1.23	0.12	0.42	0.11	0.01	0	0
	49	50	LYS	285	0	0	0	0	0	0	0	0	-0.01	0	-0.01	0	10.65	0.8	-0.24	0.09	10.41	0.82	10.65	0.8	-0.25	0.09	10.4	0.82	-10.51	0.79	0.21	0.09	-10.3	0.82	0	0	0	0	0	0	-10.51	0.79	0.21	0.09	-10.3	0.82	0.14	0.01	-0.04
	50	51	GLU	286	0	0	0	0	0	0	-0.51	0.27	-0.04	0.02	-0.55	0.28	-29.52	4.21	-2.42	0.27	-31.94	4.25	-30.03	4.37	-2.46	0.28	-32.49	4.42	31.46	5.13	2.46	0.29	33.92	5.18	-0.06	0.03	0	0	-0.06	0.03	31.4	5.12	2.46	0.29	33.86	5.17	1.38	0.92	0
	51	52	ALA	287	0	0	0	0	0	0	-0.01	0	-0.02	0.01	-0.03	0.01	-0.1	0.02	-0.12	0.16	-0.22	0.16	-0.1	0.02	-0.14	0.16	-0.25	0.16	0.11	0.02	0.12	0.16	0.23	0.17	0	0	0	0	0	0	0.11	0.02	0.12	0.16	0.23	0.17	0	0	-0.02
	52	53	ALA	288	0	0	0	0	0	0	0	0	-0.01	0	-0.01	0	-0.07	0.01	0.2	0.11	0.13	0.11	-0.07	0.01	0.2	0.11	0.12	0.11	0.07	0.01	-0.21	0.11	-0.14	0.11	0	0	0	0	0	0	0.07	0.01	-0.21	0.11	-0.14	0.11	0	0	-0.01
	53	54	VAL	289	0	0	0	0	0	0	-0.02	0.01	-0.01	0	-0.03	0.01	1.79	0.11	-1.12	0.14	0.67	0.2	1.77	0.11	-1.13	0.14	0.64	0.19	-1.8	0.12	1.06	0.15	-0.73	0.21	0	0	0	0	0	0	-1.8	0.12	1.06	0.15	-0.73	0.21	-0.02	0.01	-0.07
	54	55	MET	290	0	0	0	0	0	0	-0.59	0.25	-0.04	0.01	-0.63	0.25	-0.37	0.73	-0.62	0.16	-0.99	0.76	-0.96	0.69	-0.66	0.16	-1.62	0.71	0.28	0.63	0.56	0.17	0.84	0.67	-0.1	0.03	0	0	-0.1	0.03	0.18	0.62	0.56	0.17	0.74	0.66	-0.78	0.23	-0.1
	55	56	LYS	291	0	0	0	0	0	0	0	0	-0.01	0	-0.01	0	10.83	0.49	-0.12	0.1	10.71	0.51	10.83	0.49	-0.13	0.1	10.7	0.51	-10.69	0.48	0.15	0.1	-10.53	0.5	0	0	0	0	0	0	-10.69	0.48	0.15	0.1	-10.53	0.5	0.14	0.01	0.03
	56	57	GLU	292	0	0	0	0	0	0	0	0	0	0	-0.01	0	-8.83	0.31	-1.06	0.06	-9.89	0.32	-8.83	0.31	-1.07	0.06	-9.89	0.32	8.72	0.31	1.04	0.07	9.76	0.32	0	0	0	0	0	0	8.72	0.31	1.04	0.07	9.76	0.32	-0.1	0	-0.03
	57	58	ILE	293	0	0	0	0	0	0	-0.06	0.02	-0.01	0	-0.06	0.02	1.44	0.06	-1.44	0.12	-0.01	0.11	1.38	0.05	-1.45	0.12	-0.07	0.11	-1.42	0.06	1.43	0.12	0.01	0.12	0	0.01	0	0	0	0.01	-1.42	0.06	1.43	0.12	0.01	0.11	-0.05	0.02	-0.01
	58	59	LYS	294	0	0	0	0	0	0	0	0	0	0	0	0	9.94	0.96	-0.02	0.04	9.92	0.97	9.94	0.96	-0.02	0.04	9.92	0.97	-9.81	0.94	0.03	0.04	-9.77	0.95	0	0	0	0	0	0	-9.81	0.94	0.03	0.04	-9.77	0.95	0.13	0.02	0.02
	59	60	HIS	295	0	0	0	0	0	0	0	0	0	0	0	0	-0.09	0.04	-0.92	0.05	-1.01	0.07	-0.09	0.04	-0.92	0.05	-1.01	0.07	0.09	0.04	0.91	0.05	1	0.07	0	0	0	0	0	0	0.09	0.04	0.91	0.05	1	0.07	0	0	-0.01
	60	61	PRO	296	0	0	0	0	0	0	0	0	0	0	0	0	1.93	0.05	-2.25	0.1	-0.32	0.08	1.93	0.05	-2.25	0.1	-0.32	0.08	-1.91	0.05	2.22	0.09	0.32	0.07	0	0	0	0	0	0	-1.91	0.05	2.22	0.09	0.32	0.07	0.02	0	-0.03
	61	62	ASN	297	0	0	0	0	0	0	0	0	0	0	0	0	0.25	0.05	-0.14	0.07	0.11	0.07	0.25	0.05	-0.14	0.07	0.11	0.07	-0.24	0.05	0.12	0.07	-0.12	0.07	0	0	0	0	0	0	-0.24	0.05	0.12	0.07	-0.12	0.07	0.01	0	-0.02
	62	63	LEU	298	0	0	0	0	0	0	-0.01	0	-0.01	0	-0.03	0.01	1.1	0.04	-0.3	0.07	0.81	0.09	1.09	0.04	-0.31	0.07	0.78	0.09	-1.09	0.04	0.24	0.07	-0.85	0.09	0	0	0	0	0	0	-1.09	0.04	0.24	0.07	-0.85	0.09	0	0	-0.07
	63	64	VAL	299	0	0	0	0	0	0	-0.6	0.26	-0.07	0.03	-0.68	0.28	2.6	0.2	-1.96	0.27	0.63	0.3	1.99	0.3	-2.03	0.27	-0.04	0.38	-2.53	0.16	1.96	0.29	-0.57	0.3	-0.08	0.02	0	0	-0.08	0.02	-2.61	0.16	1.96	0.29	-0.66	0.31	-0.62	0.26	-0.08
	64	65	GLN	300	0	0	0	0	0	0	-0.01	0	-0.04	0.01	-0.05	0.02	0.45	0.37	-1.4	0.29	-0.94	0.5	0.44	0.37	-1.44	0.29	-1	0.49	-0.43	0.37	1.43	0.3	0.99	0.5	0	0	0	0	0	0	-0.43	0.37	1.43	0.3	0.99	0.5	0.01	0.01	-0.01
	65	66	LEU	301	0	0	0	0	0	0	-0.04	0.01	-0.02	0	-0.06	0.02	1.24	0.09	-0.63	0.08	0.6	0.12	1.2	0.08	-0.66	0.08	0.54	0.11	-1.21	0.09	0.61	0.08	-0.6	0.13	0	0	0	0	0	0	-1.21	0.09	0.61	0.08	-0.6	0.13	-0.02	0.02	-0.05
	66	67	LEU	302	0	0	0	0	0	0	-0.01	0	-0.01	0	-0.02	0	1.01	0.06	-0.35	0.04	0.66	0.09	1	0.06	-0.36	0.04	0.64	0.09	-1	0.07	0.35	0.05	-0.65	0.1	0	0	0	0	0	0	-1	0.07	0.35	0.05	-0.65	0.1	0	0.01	-0.01
	67	68	GLY	303	0	0	0	0	0	0	0	0	-0.01	0	-0.01	0	0	0	-0.72	0.1	-0.72	0.1	0	0	-0.73	0.1	-0.73	0.1	0	0	0.74	0.1	0.74	0.1	0	0	0	0	0	0	0	0	0.74	0.1	0.74	0.1	0	0	0.01
	68	69	VAL	304	0	0	0	0	0	0	-0.01	0	0	0	-0.01	0	1.49	0.06	-1.06	0.06	0.43	0.06	1.48	0.06	-1.06	0.06	0.41	0.06	-1.48	0.07	1.05	0.06	-0.43	0.06	0	0	0	0	0	0	-1.48	0.07	1.05	0.06	-0.43	0.06	-0.01	0.01	-0.01
	69	70	CYS	305	0	0	0	0	0	0	0	0	0	0	0	0	-0.32	0.08	-0.03	0.09	-0.35	0.13	-0.33	0.08	-0.03	0.09	-0.36	0.13	0.32	0.08	0.04	0.09	0.36	0.13	0	0	0	0	0	0	0.32	0.08	0.04	0.09	0.36	0.13	0	0	0.01
	70	71	THR	306	0	0	0	0	0	0	0	0	0	0	0	0	0.64	0.17	-0.55	0.04	0.09	0.17	0.64	0.17	-0.55	0.04	0.09	0.17	-0.63	0.17	0.55	0.04	-0.08	0.17	0	0	0	0	0	0	-0.63	0.17	0.55	0.04	-0.08	0.17	0.01	0	0
	71	72	ARG	307	0	0	0	0	0	0	0	0	0	0	0	0	7.89	0.21	-0.17	0.04	7.72	0.22	7.89	0.21	-0.17	0.04	7.72	0.22	-7.79	0.21	0.17	0.04	-7.62	0.22	0	0	0	0	0	0	-7.79	0.21	0.17	0.04	-7.62	0.22	0.1	0	0
	72	73	GLU	308	0	0	0	0	0	0	0	0	0	0	0	0	-6.56	0.32	-1.25	0.05	-7.81	0.33	-6.56	0.32	-1.25	0.05	-7.82	0.33	6.48	0.32	1.24	0.05	7.72	0.33	0	0	0	0	0	0	6.48	0.32	1.24	0.05	7.72	0.33	-0.08	0	-0.01
	73	74	PRO	309	0	0	0	0	0	0	0	0	0	0	0	0	1.66	0.04	-1.42	0.03	0.24	0.03	1.66	0.04	-1.42	0.03	0.24	0.03	-1.63	0.04	1.4	0.03	-0.23	0.03	0	0	0	0	0	0	-1.63	0.04	1.4	0.03	-0.23	0.03	0.02	0	-0.02
	74	75	PRO	310	0	0	0	0	0	0	0	0	0	0	0	0	1.89	0.06	-1.73	0.06	0.16	0.06	1.89	0.06	-1.73	0.06	0.16	0.06	-1.86	0.06	1.7	0.06	-0.16	0.06	0	0	0	0	0	0	-1.86	0.06	1.7	0.06	-0.16	0.06	0.02	0	-0.03
	75	76	PHE	311	0	0	0	0	0	0	0	0	0	0	-0.01	0	0.2	0.01	-0.4	0.11	-0.2	0.11	0.2	0.01	-0.41	0.11	-0.2	0.11	-0.2	0.01	0.38	0.11	0.18	0.11	0	0	0	0	0	0	-0.2	0.01	0.38	0.11	0.18	0.11	0	0	-0.03
	76	77	TYR	312	0	0	0	0	0	0	-0.01	0	-0.01	0	-0.02	0	0.5	0.05	0.25	0.11	0.75	0.14	0.49	0.05	0.23	0.11	0.72	0.14	-0.48	0.05	-0.31	0.11	-0.79	0.13	0	0	0	0	0	0	-0.48	0.05	-0.31	0.11	-0.79	0.13	0.01	0	-0.08
	77	78	ILE	313	0	0	0	0	0	0	-0.35	0.14	-0.12	0.03	-0.47	0.15	2.17	0.15	-2.23	0.51	-0.06	0.56	1.82	0.11	-2.35	0.51	-0.54	0.5	-2.14	0.14	2.34	0.47	0.2	0.51	-0.03	0.01	0	0	-0.03	0.01	-2.17	0.14	2.33	0.47	0.17	0.52	-0.35	0.14	-0.02
	78	79	ILE	314	0	0	0	0	0	0	-0.02	0	-0.08	0.01	-0.1	0.02	1.37	0.06	-1.51	0.2	-0.14	0.21	1.34	0.06	-1.59	0.21	-0.25	0.22	-1.36	0.06	1.43	0.2	0.06	0.2	0	0	0	0	0	0	-1.36	0.06	1.43	0.2	0.06	0.2	-0.02	0.01	-0.16
	79	80	THR	315	0	0	0	0	0	0	-0.35	0.68	-0.19	0.05	-0.55	0.65	-1.41	1.91	-0.59	0.22	-2	2.03	-1.76	1.55	-0.79	0.25	-2.55	1.7	0.49	0.81	0.47	0.22	0.97	0.83	-0.15	0.02	0	0	-0.15	0.02	0.34	0.81	0.47	0.22	0.81	0.83	-1.42	1.22	-0.31
	80	81	GLU	316	0	0	0	0	0	0	-0.05	0.03	-0.16	0.09	-0.22	0.12	-13.49	0.63	-3.67	0.69	-17.17	1.13	-13.55	0.63	-3.84	0.64	-17.38	1.09	13.37	0.64	4.04	0.5	17.41	1	0	0	-0.02	0.02	-0.02	0.02	13.37	0.64	4.02	0.51	17.39	1.01	-0.18	0.03	0.18
	81	82	PHE	317	0	0	0	0	0	0	-0.03	0.01	-0.04	0.02	-0.07	0.03	0.2	0.06	0.11	0.15	0.31	0.15	0.16	0.06	0.08	0.14	0.24	0.14	-0.17	0.06	-0.05	0.14	-0.22	0.14	0	0	0	0	0	0	-0.17	0.06	-0.05	0.14	-0.22	0.14	-0.01	0.01	0.03
	82	83	MET	318	0	0	0	0	0	0	-0.03	0.02	-0.02	0.01	-0.05	0.03	0.31	0.19	-0.92	0.12	-0.61	0.24	0.27	0.19	-0.94	0.12	-0.66	0.24	-0.28	0.19	0.94	0.12	0.66	0.23	0	0	0	0	0	0	-0.28	0.19	0.94	0.12	0.65	0.23	-0.01	0.02	0
	83	84	THR	319	0	0	0	0	0	0	0	0	0	0	0	0	0.36	0.03	-0.51	0.09	-0.15	0.09	0.36	0.03	-0.52	0.09	-0.16	0.09	-0.35	0.03	0.51	0.09	0.16	0.09	0	0	0	0	0	0	-0.35	0.03	0.51	0.09	0.16	0.09	0	0	0
	84	85	TYR	320	0	0	0	0	0	0	0	0	0	0	0	0	0.24	0.02	-0.07	0.06	0.17	0.06	0.24	0.02	-0.07	0.06	0.17	0.06	-0.23	0.02	0.07	0.05	-0.16	0.06	0	0	0	0	0	0	-0.23	0.02	0.07	0.05	-0.16	0.06	0	0	0
	85	86	GLY	321	0	0	0	0	0	0	0	0	-0.01	0	-0.01	0	0	0	0.27	0.2	0.27	0.2	0	0	0.26	0.2	0.26	0.2	0	0	-0.26	0.2	-0.26	0.2	0	0	0	0	0	0	0	0	-0.26	0.2	-0.26	0.2	0	0	0
	86	87	ASN	322	0	0	0	0	0	0	-0.01	0	-0.01	0	-0.02	0	0.52	0.12	0.59	0.1	1.1	0.15	0.51	0.12	0.58	0.1	1.09	0.15	-0.51	0.12	-0.6	0.1	-1.11	0.15	0	0	0	0	0	0	-0.51	0.12	-0.6	0.1	-1.11	0.15	0	0	-0.02
	87	88	LEU	323	0	0	0	0	0	0	0	0	0	0	0	0	0.82	0.03	-0.41	0.02	0.4	0.03	0.82	0.03	-0.42	0.02	0.4	0.03	-0.81	0.03	0.41	0.02	-0.4	0.03	0	0	0	0	0	0	-0.81	0.03	0.41	0.02	-0.4	0.03	0.01	0	0
	88	89	LEU	324	0	0	0	0	0	0	0	0	0	0	0	0	0.76	0.02	-0.34	0.01	0.42	0.03	0.76	0.02	-0.34	0.01	0.42	0.03	-0.75	0.02	0.34	0.01	-0.41	0.03	0	0	0	0	0	0	-0.75	0.02	0.34	0.01	-0.41	0.03	0.01	0	0
	89	90	ASP	325	0	0	0	0	0	0	0	0	0	0	0	0	-8.03	0.27	-1.01	0.04	-9.04	0.28	-8.04	0.27	-1.01	0.04	-9.04	0.28	7.95	0.27	1	0.04	8.94	0.28	0	0	0	0	0	0	7.95	0.27	1	0.04	8.94	0.28	-0.09	0	-0.01
	90	91	TYR	326	0	0	0	0	0	0	0	0	0	0	0	0	0.27	0.03	0.04	0.02	0.3	0.04	0.27	0.03	0.03	0.02	0.3	0.04	-0.26	0.03	-0.03	0.02	-0.3	0.04	0	0	0	0	0	0	-0.26	0.03	-0.03	0.02	-0.3	0.04	0	0	0
	91	92	LEU	327	0	0	0	0	0	0	0	0	0	0	0	0	0.62	0.02	-0.36	0.01	0.26	0.02	0.62	0.02	-0.36	0.01	0.26	0.02	-0.61	0.02	0.36	0.01	-0.25	0.02	0	0	0	0	0	0	-0.61	0.02	0.36	0.01	-0.25	0.02	0.01	0	0
	92	93	ARG	328	0	0	0	0	0	0	0	0	0	0	0	0	8.27	0.26	-0.09	0.02	8.19	0.26	8.27	0.26	-0.09	0.02	8.19	0.26	-8.16	0.26	0.08	0.02	-8.08	0.26	0	0	0	0	0	0	-8.16	0.26	0.08	0.02	-8.08	0.26	0.11	0	0
	93	94	GLU	329	0	0	0	0	0	0	0	0	0	0	0	0	-6.96	0.31	-0.7	0.04	-7.65	0.32	-6.96	0.31	-0.7	0.04	-7.65	0.32	6.88	0.31	0.69	0.04	7.56	0.32	0	0	0	0	0	0	6.88	0.31	0.69	0.04	7.56	0.32	-0.08	0	-0.01
	94	95	CYS	330	0	0	0	0	0	0	0	0	0	0	0	0	-0.08	0.04	0.24	0.03	0.16	0.06	-0.08	0.04	0.24	0.03	0.16	0.06	0.08	0.04	-0.24	0.03	-0.16	0.06	0	0	0	0	0	0	0.08	0.04	-0.24	0.03	-0.16	0.06	0	0	0
	95	96	ASN	331	0	0	0	0	0	0	0	0	0	0	0	0	0.02	0.03	-0.03	0.02	-0.01	0.04	0.02	0.03	-0.03	0.02	-0.01	0.04	-0.02	0.03	0.03	0.02	0.01	0.04	0	0	0	0	0	0	-0.02	0.03	0.03	0.02	0.01	0.04	0	0	0
	96	97	ARG	332	0	0	0	0	0	0	0	0	0	0	0	0	5.91	0.15	-0.19	0.02	5.72	0.15	5.91	0.15	-0.19	0.02	5.72	0.15	-5.84	0.15	0.19	0.02	-5.65	0.15	0	0	0	0	0	0	-5.84	0.15	0.19	0.02	-5.65	0.15	0.07	0	0
	97	98	GLN	333	0	0	0	0	0	0	0	0	0	0	0	0	0.16	0.05	-0.12	0.02	0.04	0.06	0.16	0.05	-0.12	0.02	0.04	0.06	-0.16	0.05	0.11	0.02	-0.04	0.06	0	0	0	0	0	0	-0.16	0.05	0.11	0.02	-0.04	0.06	0	0	0
	98	99	GLU	334	0	0	0	0	0	0	0	0	0	0	0	0	-5.19	0.37	-0.64	0.04	-5.83	0.38	-5.19	0.37	-0.64	0.04	-5.83	0.38	5.12	0.37	0.63	0.04	5.76	0.37	0	0	0	0	0	0	5.12	0.37	0.63	0.04	5.76	0.37	-0.06	0	-0.01
	99	100	VAL	335	0	0	0	0	0	0	0	0	0	0	0	0	0.68	0.02	-0.56	0.04	0.12	0.03	0.68	0.02	-0.56	0.04	0.12	0.03	-0.67	0.01	0.56	0.04	-0.12	0.03	0	0	0	0	0	0	-0.67	0.01	0.56	0.04	-0.12	0.03	0.01	0	-0.01
	100	101	ASN	336	0	0	0	0	0	0	0	0	0	0	0	0	-0.11	0.07	-0.11	0.02	-0.21	0.08	-0.11	0.07	-0.11	0.02	-0.21	0.08	0.1	0.07	0.11	0.02	0.21	0.08	0	0	0	0	0	0	0.1	0.07	0.11	0.02	0.21	0.08	0	0	0
	101	102	ALA	337	0	0	0	0	0	0	0	0	0	0	0	0	-0.02	0	-0.1	0.02	-0.12	0.02	-0.02	0	-0.1	0.02	-0.12	0.02	0.02	0	0.1	0.02	0.12	0.02	0	0	0	0	0	0	0.02	0	0.1	0.02	0.12	0.02	0	0	0
	102	103	VAL	338	0	0	0	0	0	0	0	0	0	0	0	0	0.6	0.01	-0.71	0.02	-0.12	0.02	0.6	0.01	-0.71	0.02	-0.12	0.02	-0.59	0.01	0.7	0.02	0.12	0.02	0	0	0	0	0	0	-0.59	0.01	0.7	0.02	0.12	0.02	0.01	0	-0.01
	103	104	VAL	339	0	0	0	0	0	0	0	0	0	0	0	0	0.69	0.01	-0.84	0.02	-0.15	0.02	0.69	0.01	-0.84	0.02	-0.15	0.02	-0.68	0.01	0.83	0.02	0.15	0.02	0	0	0	0	0	0	-0.68	0.01	0.83	0.02	0.15	0.02	0.01	0	-0.01
	104	105	LEU	340	0	0	0	0	0	0	0	0	0	0	0	0	0.5	0.01	-0.69	0.02	-0.2	0.02	0.5	0.01	-0.69	0.02	-0.2	0.02	-0.49	0.01	0.68	0.02	0.19	0.02	0	0	0	0	0	0	-0.49	0.01	0.68	0.02	0.19	0.02	0.01	0	-0.01
	105	106	LEU	341	0	0	0	0	0	0	0	0	0	0	0	0	0.45	0.01	-0.64	0.02	-0.18	0.02	0.45	0.01	-0.64	0.02	-0.18	0.02	-0.45	0.01	0.63	0.02	0.18	0.02	0	0	0	0	0	0	-0.45	0.01	0.63	0.02	0.18	0.02	0.01	0	-0.01
	106	107	TYR	342	0	0	0	0	0	0	0	0	0	0	0	0	0.2	0.04	-0.35	0.02	-0.14	0.04	0.2	0.04	-0.35	0.02	-0.14	0.04	-0.2	0.04	0.34	0.02	0.14	0.04	0	0	0	0	0	0	-0.2	0.04	0.34	0.02	0.14	0.04	0	0	0
	107	108	MET	343	0	0	0	0	0	0	0	0	0	0	0	0	0.4	0.05	-0.65	0.03	-0.24	0.06	0.4	0.05	-0.65	0.03	-0.25	0.06	-0.4	0.05	0.64	0.03	0.24	0.06	0	0	0	0	0	0	-0.4	0.05	0.64	0.03	0.24	0.06	0.01	0	-0.01
	108	109	ALA	344	0	0	0	0	0	0	0	0	0	0	0	0	-0.03	0	-0.17	0.03	-0.2	0.04	-0.03	0	-0.17	0.03	-0.2	0.04	0.03	0	0.17	0.03	0.2	0.03	0	0	0	0	0	0	0.03	0	0.17	0.03	0.2	0.03	0	0	0
	109	110	THR	345	0	0	0	0	0	0	0	0	0	0	0	0	0.49	0.02	-0.5	0.02	-0.01	0.03	0.49	0.02	-0.5	0.02	-0.01	0.03	-0.49	0.02	0.5	0.02	0.01	0.03	0	0	0	0	0	0	-0.49	0.02	0.5	0.02	0.01	0.03	0.01	0	-0.01
	110	111	GLN	346	0	0	0	0	0	0	0	0	0	0	0	0	0.02	0.05	-0.43	0.04	-0.42	0.07	0.02	0.05	-0.44	0.04	-0.42	0.07	-0.02	0.05	0.43	0.04	0.41	0.07	0	0	0	0	0	0	-0.02	0.05	0.43	0.04	0.41	0.07	0	0	-0.01
	111	112	ILE	347	0	0	0	0	0	0	0	0	0	0	0	0	0.88	0.02	-1.07	0.04	-0.18	0.03	0.88	0.02	-1.07	0.04	-0.18	0.03	-0.87	0.02	1.05	0.04	0.18	0.03	0	0	0	0	0	0	-0.87	0.02	1.05	0.04	0.18	0.03	0.01	0	-0.01
	112	113	SER	348	0	0	0	0	0	0	0	0	0	0	0	0	0.54	0.05	-0.58	0.04	-0.04	0.06	0.54	0.05	-0.58	0.04	-0.04	0.06	-0.53	0.05	0.57	0.04	0.04	0.05	0	0	0	0	0	0	-0.53	0.05	0.57	0.04	0.04	0.05	0.01	0	-0.01
	113	114	SER	349	0	0	0	0	0	0	0	0	0	0	0	0	0.53	0.1	-0.46	0.03	0.07	0.1	0.53	0.1	-0.46	0.03	0.07	0.1	-0.53	0.1	0.46	0.03	-0.07	0.1	0	0	0	0	0	0	-0.53	0.1	0.46	0.03	-0.07	0.1	0.01	0	-0.01
	114	115	ALA	350	0	0	0	0	0	0	0	0	0	0	0	0	0.02	0.01	0.03	0.06	0.05	0.07	0.02	0.01	0.03	0.06	0.05	0.07	-0.02	0.01	-0.03	0.06	-0.05	0.07	0	0	0	0	0	0	-0.02	0.01	-0.03	0.06	-0.05	0.07	0	0	-0.01
	115	116	MET	351	0	0	0	0	0	0	0	0	0	0	0	0	0.21	0.02	-0.53	0.04	-0.31	0.04	0.21	0.02	-0.53	0.04	-0.31	0.04	-0.21	0.02	0.52	0.04	0.32	0.04	0	0	0	0	0	0	-0.21	0.02	0.52	0.04	0.32	0.04	0.01	0	0
	116	117	GLU	352	0	0	0	0	0	0	0	0	0	0	0	0	-6.5	0.17	-1	0.04	-7.5	0.17	-6.5	0.17	-1	0.04	-7.5	0.17	6.42	0.16	0.99	0.04	7.41	0.17	0	0	0	0	0	0	6.42	0.16	0.99	0.04	7.41	0.17	-0.08	0	-0.01
	117	118	TYR	353	0	0	0	0	0	0	0	0	0	0	0	0	0.53	0.04	-0.1	0.04	0.44	0.06	0.53	0.04	-0.1	0.05	0.43	0.06	-0.52	0.03	0.09	0.04	-0.43	0.06	0	0	0	0	0	0	-0.52	0.03	0.09	0.04	-0.43	0.06	0.01	0	-0.01
	118	119	LEU	354	0	0	0	0	0	0	0	0	0	0	-0.01	0	0.9	0.03	-0.71	0.05	0.2	0.05	0.9	0.03	-0.71	0.05	0.19	0.05	-0.89	0.03	0.7	0.05	-0.19	0.05	0	0	0	0	0	0	-0.89	0.03	0.7	0.05	-0.19	0.05	0.01	0	-0.01
	119	120	GLU	355	0	0	0	0	0	0	0	0	0	0	0	0	-6.43	0.12	-1.02	0.04	-7.45	0.14	-6.43	0.12	-1.02	0.04	-7.45	0.14	6.35	0.12	1.01	0.04	7.36	0.13	0	0	0	0	0	0	6.35	0.12	1.01	0.04	7.36	0.13	-0.08	0	-0.01
	120	121	LYS	356	0	0	0	0	0	0	0	0	0	0	0	0	7.55	0.27	-0.01	0.02	7.55	0.27	7.55	0.26	-0.01	0.02	7.55	0.27	-7.46	0.26	0.01	0.02	-7.45	0.26	0	0	0	0	0	0	-7.46	0.26	0.01	0.02	-7.45	0.26	0.1	0	0
	121	122	LYS	357	0	0	0	0	0	0	0	0	0	0	0	0	9.77	0.41	-0.28	0.06	9.49	0.42	9.77	0.41	-0.28	0.06	9.49	0.42	-9.64	0.4	0.28	0.06	-9.36	0.41	0	0	0	0	0	0	-9.64	0.4	0.28	0.06	-9.36	0.41	0.13	0.01	0
	122	123	ASN	358	0	0	0	0	0	0	0	0	0	0	0	0	-0.12	0.11	0.04	0.05	-0.09	0.12	-0.12	0.11	0.03	0.05	-0.09	0.12	0.12	0.11	-0.03	0.05	0.09	0.12	0	0	0	0	0	0	0.12	0.11	-0.03	0.05	0.09	0.12	0	0	0
	123	124	PHE	359	0	0	0	0	0	0	0	0	0	0	-0.01	0	0.21	0.05	0.03	0.1	0.24	0.11	0.21	0.05	0.03	0.1	0.24	0.11	-0.19	0.05	-0.03	0.1	-0.22	0.1	0	0	0	0	0	0	-0.19	0.05	-0.03	0.1	-0.22	0.1	0.01	0	0
	124	125	ILE	360	0	0	0	0	0	0	0	0	0	0	0	0	0.92	0.03	-1.43	0.1	-0.51	0.09	0.92	0.03	-1.43	0.1	-0.51	0.09	-0.91	0.03	1.41	0.1	0.51	0.09	0	0	0	0	0	0	-0.91	0.03	1.41	0.1	0.51	0.09	0.01	0	-0.02
	125	126	HIS	361	0	0	0	0	0	0	-0.01	0	0	0	-0.02	0	1.34	0.23	-0.94	0.07	0.4	0.25	1.33	0.23	-0.95	0.07	0.38	0.24	-1.28	0.23	0.93	0.07	-0.35	0.25	0	0	0	0	0	0	-1.28	0.23	0.93	0.07	-0.35	0.25	0.04	0.01	-0.02
	126	127	ARG	362	0	0	0	0	0	0	0	0	0	0	0	0	11.78	0.7	-0.36	0.07	11.43	0.7	11.78	0.7	-0.36	0.07	11.42	0.7	-11.62	0.69	0.36	0.07	-11.26	0.69	0	0	0	0	0	0	-11.62	0.69	0.36	0.07	-11.26	0.69	0.16	0.01	0
	127	128	ASP	363	0	0	0	0	0	0	-0.01	0	0	0	-0.01	0	-12.62	0.4	-2.1	0.12	-14.72	0.45	-12.63	0.4	-2.1	0.12	-14.73	0.45	12.49	0.39	2.06	0.12	14.56	0.44	0	0	0	0	0	0	12.49	0.39	2.06	0.12	14.56	0.44	-0.14	0.01	-0.04
	128	129	LEU	364	0	0	0	0	0	0	0	0	0	0	0	0	0.82	0.02	-0.5	0.04	0.32	0.04	0.82	0.02	-0.51	0.04	0.32	0.04	-0.82	0.02	0.5	0.04	-0.31	0.04	0	0	0	0	0	0	-0.82	0.02	0.5	0.04	-0.31	0.04	0.01	0	0
	129	130	ALA	365	0	0	0	0	0	0	0	0	0	0	0	0	-0.03	0.01	-0.46	0.04	-0.49	0.04	-0.03	0.01	-0.47	0.04	-0.49	0.04	0.03	0.01	0.45	0.04	0.48	0.04	0	0	0	0	0	0	0.03	0.01	0.45	0.04	0.48	0.04	0	0	-0.01
	130	131	ALA	366	0	0	0	0	0	0	0	0	0	0	0	0	-0.06	0	-0.38	0.06	-0.44	0.06	-0.06	0	-0.38	0.06	-0.44	0.06	0.06	0	0.36	0.06	0.42	0.06	0	0	0	0	0	0	0.06	0	0.36	0.06	0.42	0.06	0	0	-0.02
	131	132	ARG	367	0	0	0	0	0	0	-0.01	0	-0.01	0	-0.01	0	12.12	0.29	-1.03	0.09	11.09	0.26	12.11	0.29	-1.04	0.09	11.08	0.26	-11.96	0.28	1.02	0.09	-10.94	0.25	0	0	0	0	0	0	-11.96	0.28	1.02	0.09	-10.94	0.25	0.15	0.01	-0.02
	132	133	ASN	368	0	0	0	0	0	0	-0.02	0	-0.02	0.01	-0.04	0.01	-1.25	0.26	-0.35	0.3	-1.6	0.35	-1.27	0.26	-0.37	0.3	-1.64	0.36	1.27	0.27	0.35	0.31	1.61	0.37	0	0	0	0	0	0	1.27	0.27	0.35	0.31	1.61	0.37	0	0.02	-0.02
	133	134	CYS	369	0	0	0	0	0	0	0	0	-0.01	0	-0.02	0	-0.26	0.09	0.37	0.19	0.11	0.21	-0.26	0.09	0.35	0.19	0.09	0.21	0.26	0.09	-0.35	0.19	-0.09	0.21	0	0	0	0	0	0	0.26	0.09	-0.35	0.19	-0.09	0.21	0	0	0
	134	135	LEU	370	0	0	0	0	0	0	-0.21	0.13	-0.01	0.01	-0.23	0.13	1.48	0.12	-0.9	0.11	0.57	0.13	1.27	0.11	-0.92	0.11	0.35	0.16	-1.43	0.11	0.9	0.1	-0.54	0.13	-0.07	0.04	0	0	-0.07	0.04	-1.5	0.13	0.9	0.1	-0.6	0.14	-0.24	0.16	-0.02
	135	136	VAL	371	0	0	0	0	0	0	0	0	0	0	-0.01	0	1.18	0.04	-1.58	0.1	-0.39	0.08	1.18	0.04	-1.58	0.1	-0.4	0.08	-1.17	0.04	1.57	0.09	0.39	0.08	0	0	0	0	0	0	-1.17	0.04	1.57	0.09	0.39	0.08	0.01	0	-0.01
	136	137	GLY	372	0	0	0	0	0	0	0	0	0	0	0	0	0	0	0.09	0.05	0.09	0.05	0	0	0.08	0.05	0.08	0.05	0	0	-0.08	0.04	-0.08	0.04	0	0	0	0	0	0	0	0	-0.08	0.04	-0.08	0.04	0	0	0.01
	137	138	GLU	373	0	0	0	0	0	0	0	0	0	0	0	0	-7.22	0.2	-1.25	0.05	-8.47	0.22	-7.22	0.2	-1.25	0.05	-8.47	0.22	7.14	0.2	1.23	0.05	8.37	0.22	0	0	0	0	0	0	7.14	0.2	1.23	0.05	8.37	0.22	-0.08	0	-0.01
	138	139	ASN	374	0	0	0	0	0	0	0	0	0	0	0	0	0.04	0.06	-0.03	0.03	0.02	0.07	0.04	0.06	-0.03	0.03	0.02	0.07	-0.04	0.06	0.03	0.03	-0.01	0.06	0	0	0	0	0	0	-0.04	0.06	0.03	0.03	-0.01	0.06	0	0	0
	139	140	HIS	375	0	0	0	0	0	0	0	0	0	0	0	0	0.19	0.16	-0.22	0.04	-0.04	0.16	0.19	0.16	-0.22	0.04	-0.04	0.16	-0.18	0.15	0.22	0.04	0.04	0.16	0	0	0	0	0	0	-0.18	0.15	0.22	0.04	0.04	0.16	0	0	0
	140	141	LEU	376	0	0	0	0	0	0	0	0	0	0	0	0	0.76	0.03	-0.86	0.07	-0.1	0.07	0.76	0.03	-0.86	0.07	-0.1	0.07	-0.75	0.03	0.84	0.07	0.09	0.07	0	0	0	0	0	0	-0.75	0.03	0.84	0.07	0.09	0.07	0.01	0	-0.02
	141	142	VAL	377	0	0	0	0	0	0	0	0	0	0	0	0	1.14	0.03	-0.86	0.05	0.27	0.06	1.13	0.03	-0.86	0.05	0.27	0.06	-1.13	0.03	0.84	0.05	-0.29	0.06	0	0	0	0	0	0	-1.13	0.03	0.84	0.05	-0.29	0.06	0.01	0	-0.02
	142	143	LYS	378	0	0	0	0	0	0	-0.02	0.01	-0.01	0	-0.03	0.01	14.3	0.65	-0.38	0.15	13.92	0.69	14.28	0.65	-0.39	0.15	13.9	0.68	-14.1	0.65	0.37	0.15	-13.74	0.68	0	0	0	0	0	0	-14.1	0.65	0.37	0.15	-13.74	0.68	0.18	0.01	-0.02
	143	144	VAL	379	0	0	0	0	0	0	-0.01	0	-0.03	0.01	-0.03	0.01	1.62	0.06	-2.06	0.15	-0.44	0.12	1.61	0.06	-2.09	0.15	-0.47	0.13	-1.62	0.06	2.05	0.16	0.43	0.13	0	0	0	0	0	0	-1.62	0.06	2.05	0.16	0.43	0.13	-0.01	0	-0.04
	144	145	ALA	380	0	0	0	0	0	0	-0.15	0.08	-0.14	0.05	-0.29	0.12	0.04	0.05	2.31	0.28	2.35	0.31	-0.11	0.06	2.17	0.26	2.06	0.25	-0.02	0.05	-2.3	0.21	-2.31	0.24	-0.01	0.01	0	0	-0.02	0.01	-0.03	0.06	-2.3	0.22	-2.33	0.25	-0.14	0.09	-0.13
	145	146	ASP	381	0	0	0	0	0	0	-0.54	0.15	-0.79	0.32	-1.33	0.36	-25.05	2.07	-7.18	0.95	-32.23	2.12	-25.59	2.14	-7.97	0.86	-33.56	2.18	26.05	2.48	8.8	0.89	34.85	2.54	-0.07	0.03	-0.15	0.02	-0.22	0.04	25.98	2.47	8.65	0.88	34.63	2.54	0.39	0.42	0.68
	146	147	PHE	382	0	0	0	0	0	0	-0.69	0.3	-0.55	0.24	-1.24	0.46	-0.18	0.23	-0.43	0.43	-0.61	0.49	-0.87	0.38	-0.98	0.48	-1.85	0.65	0.56	0.19	0.74	0.43	1.3	0.47	-0.06	0.03	-0.05	0.02	-0.11	0.04	0.5	0.19	0.69	0.43	1.19	0.46	-0.37	0.27	-0.29
	147	148	GLY	383	0	0	0	0	0	0	0	0	-0.13	0.1	-0.13	0.1	0	0	0.46	0.21	0.46	0.21	0	0	0.32	0.19	0.32	0.19	0	0	-0.47	0.24	-0.47	0.24	0	0	0	0	0	0	0	0	-0.47	0.24	-0.47	0.24	0	0	-0.15
	148	149	LEU	384	0	0	0	0	0	0	-0.02	0.01	-0.02	0.01	-0.04	0.02	1.14	0.04	-0.63	0.07	0.51	0.07	1.12	0.04	-0.64	0.07	0.47	0.07	-1.13	0.04	0.65	0.07	-0.49	0.07	0	0	0	0	0	0	-1.13	0.04	0.65	0.07	-0.49	0.07	-0.02	0.01	0
	149	150	SER	385	0	0	0	0	0	0	0	0	0	0	-0.01	0	0.79	0.21	-0.13	0.04	0.66	0.22	0.79	0.21	-0.13	0.04	0.66	0.22	-0.77	0.21	0.15	0.04	-0.62	0.21	0	0	0	0	0	0	-0.77	0.21	0.15	0.04	-0.62	0.21	0.02	0.01	0.01
	150	151	ARG	386	0	0	0	0	0	0	-0.01	0.01	0	0	-0.01	0.01	13.54	1.21	-0.06	0.13	13.48	1.2	13.53	1.2	-0.06	0.13	13.47	1.19	-13.35	1.19	0.07	0.13	-13.28	1.17	0	0	0	0	0	0	-13.35	1.19	0.07	0.13	-13.28	1.17	0.18	0.02	0.01
	151	152	LEU	387	0	0	0	0	0	0	-0.01	0.01	0	0	-0.01	0.01	0.99	0.05	-0.53	0.07	0.46	0.08	0.98	0.04	-0.53	0.07	0.44	0.08	-0.97	0.05	0.53	0.07	-0.44	0.08	0	0	0	0	0	0	-0.97	0.05	0.53	0.07	-0.44	0.08	0.01	0	0
	152	153	MET	388	0	0	0	0	0	0	0	0	0	0	0	0	0.65	0.18	-0.61	0.06	0.04	0.2	0.64	0.18	-0.61	0.06	0.03	0.2	-0.64	0.18	0.61	0.06	-0.03	0.19	0	0	0	0	0	0	-0.64	0.18	0.61	0.06	-0.03	0.19	0.01	0	0
	153	154	THR	389	0	0	0	0	0	0	0	0	0	0	0	0	0.4	0.09	-0.47	0.04	-0.07	0.1	0.4	0.09	-0.47	0.04	-0.07	0.1	-0.4	0.09	0.47	0.04	0.07	0.1	0	0	0	0	0	0	-0.4	0.09	0.47	0.04	0.07	0.1	0.01	0	0
	154	155	GLY	390	0	0	0	0	0	0	0	0	0	0	0	0	0	0	0.06	0.06	0.06	0.06	0	0	0.06	0.06	0.06	0.06	0	0	-0.06	0.06	-0.06	0.06	0	0	0	0	0	0	0	0	-0.06	0.06	-0.06	0.06	0	0	0
	155	156	ASP	391	0	0	0	0	0	0	0	0	0	0	0	0	-6.25	0.35	-0.98	0.05	-7.23	0.33	-6.25	0.35	-0.98	0.05	-7.23	0.33	6.17	0.35	0.97	0.05	7.14	0.33	0	0	0	0	0	0	6.17	0.35	0.97	0.05	7.14	0.33	-0.08	0	-0.01
	156	157	THR	392	0	0	0	0	0	0	0	0	0	0	0	0	0.57	0.12	-0.34	0.07	0.24	0.12	0.57	0.12	-0.34	0.07	0.23	0.12	-0.56	0.12	0.34	0.07	-0.23	0.12	0	0	0	0	0	0	-0.56	0.12	0.34	0.07	-0.23	0.12	0.01	0	0
	157	158	TYR	393	0	0	0	0	0	0	0	0	0	0	0	0	0.24	0.05	-0.17	0.04	0.08	0.06	0.24	0.05	-0.17	0.04	0.07	0.06	-0.24	0.05	0.17	0.04	-0.08	0.06	0	0	0	0	0	0	-0.24	0.05	0.17	0.04	-0.08	0.06	0	0	0
	158	159	THR	394	0	0	0	0	0	0	0	0	0	0	0	0	0.45	0.04	-0.55	0.03	-0.1	0.05	0.45	0.04	-0.55	0.03	-0.1	0.05	-0.44	0.04	0.55	0.03	0.1	0.05	0	0	0	0	0	0	-0.44	0.04	0.55	0.03	0.1	0.05	0.01	0	-0.01
	159	160	ALA	395	0	0	0	0	0	0	0	0	0	0	0	0	-0.02	0	0.08	0.02	0.06	0.02	-0.02	0	0.08	0.02	0.06	0.02	0.02	0	-0.08	0.02	-0.06	0.02	0	0	0	0	0	0	0.02	0	-0.08	0.02	-0.06	0.02	0	0	0
	160	161	HIS	396	0	0	0	0	0	0	0	0	0	0	0	0	0.24	0.03	-0.38	0.02	-0.13	0.04	0.24	0.03	-0.38	0.02	-0.13	0.04	-0.24	0.03	0.37	0.02	0.13	0.03	0	0	0	0	0	0	-0.24	0.03	0.37	0.02	0.13	0.03	0	0	0
	161	162	ALA	397	0	0	0	0	0	0	0	0	0	0	0	0	-0.01	0	-0.07	0.03	-0.08	0.03	-0.01	0	-0.07	0.03	-0.08	0.03	0.01	0	0.07	0.03	0.08	0.03	0	0	0	0	0	0	0.01	0	0.07	0.03	0.08	0.03	0	0	0
	162	163	GLY	398	0	0	0	0	0	0	0	0	0	0	0	0	0	0	-0.05	0.03	-0.05	0.03	0	0	-0.05	0.03	-0.05	0.03	0	0	0.05	0.03	0.05	0.03	0	0	0	0	0	0	0	0	0.05	0.03	0.05	0.03	0	0	0
	163	164	ALA	399	0	0	0	0	0	0	0	0	0	0	0	0	-0.01	0	0.19	0.03	0.18	0.03	-0.01	0	0.19	0.03	0.18	0.03	0.01	0	-0.18	0.03	-0.18	0.03	0	0	0	0	0	0	0.01	0	-0.18	0.03	-0.18	0.03	0	0	0
	164	165	LYS	400	0	0	0	0	0	0	0	0	0	0	0	0	9.18	0.63	-0.32	0.05	8.86	0.63	9.18	0.63	-0.32	0.05	8.86	0.63	-9.06	0.62	0.32	0.04	-8.74	0.62	0	0	0	0	0	0	-9.06	0.62	0.32	0.04	-8.74	0.62	0.12	0.01	0
	165	166	PHE	401	0	0	0	0	0	0	0	0	0	0	0	0	0.13	0.01	0	0.03	0.13	0.04	0.13	0.01	0	0.03	0.13	0.04	-0.13	0.01	0	0.03	-0.13	0.04	0	0	0	0	0	0	-0.13	0.01	0	0.03	-0.13	0.04	0	0	0
	166	167	PRO	402	0	0	0	0	0	0	0	0	0	0	0	0	2.01	0.05	-1.87	0.04	0.14	0.02	2.01	0.05	-1.87	0.04	0.14	0.02	-1.99	0.05	1.85	0.04	-0.13	0.02	0	0	0	0	0	0	-1.99	0.05	1.85	0.04	-0.13	0.02	0.03	0	-0.02
	167	168	ILE	403	0	0	0	0	0	0	0	0	0	0	0	0	0.63	0.01	-0.6	0.02	0.03	0.02	0.63	0.01	-0.6	0.02	0.03	0.02	-0.62	0.01	0.59	0.02	-0.03	0.02	0	0	0	0	0	0	-0.62	0.01	0.59	0.02	-0.03	0.02	0.01	0	-0.01
	168	169	LYS	404	0	0	0	0	0	0	0	0	0	0	0	0	7.23	0.27	-0.04	0.02	7.19	0.26	7.23	0.27	-0.04	0.02	7.19	0.26	-7.14	0.26	0.04	0.02	-7.09	0.26	0	0	0	0	0	0	-7.14	0.26	0.04	0.02	-7.09	0.26	0.09	0	0
	169	170	TRP	405	0	0	0	0	0	0	0	0	0	0	0	0	0.28	0.04	-0.17	0.04	0.11	0.06	0.28	0.04	-0.17	0.04	0.1	0.06	-0.28	0.03	0.17	0.04	-0.11	0.06	0	0	0	0	0	0	-0.28	0.03	0.17	0.04	-0.11	0.06	0	0	0
	170	171	THR	406	0	0	0	0	0	0	0	0	0	0	0	0	0.39	0.05	-0.23	0.02	0.16	0.06	0.39	0.05	-0.23	0.02	0.16	0.06	-0.38	0.05	0.23	0.02	-0.16	0.06	0	0	0	0	0	0	-0.38	0.05	0.23	0.02	-0.16	0.06	0.01	0	0
	171	172	ALA	407	0	0	0	0	0	0	0	0	0	0	0	0	-0.01	0	-0.03	0.01	-0.03	0.01	-0.01	0	-0.03	0.01	-0.04	0.01	0.01	0	0.03	0.01	0.03	0.01	0	0	0	0	0	0	0.01	0	0.03	0.01	0.03	0.01	0	0	0
	172	173	PRO	408	0	0	0	0	0	0	0	0	0	0	0	0	1.24	0.02	-1.27	0.03	-0.03	0.02	1.24	0.02	-1.27	0.03	-0.03	0.02	-1.22	0.02	1.25	0.03	0.03	0.02	0	0	0	0	0	0	-1.22	0.02	1.25	0.03	0.03	0.02	0.02	0	-0.02
	173	174	GLU	409	0	0	0	0	0	0	0	0	0	0	0	0	-5.86	0.1	-0.7	0.02	-6.56	0.11	-5.86	0.1	-0.7	0.02	-6.56	0.11	5.78	0.1	0.69	0.02	6.47	0.11	0	0	0	0	0	0	5.78	0.1	0.69	0.02	6.47	0.11	-0.07	0	-0.01
	174	175	SER	410	0	0	0	0	0	0	0	0	0	0	0	0	0.35	0.03	-0.34	0.03	0.01	0.04	0.35	0.03	-0.34	0.03	0.01	0.04	-0.35	0.03	0.34	0.03	-0.01	0.04	0	0	0	0	0	0	-0.35	0.03	0.34	0.03	-0.01	0.04	0	0	0
	175	176	LEU	411	0	0	0	0	0	0	0	0	0	0	0	0	0.48	0.01	-0.45	0.02	0.03	0.02	0.48	0.01	-0.45	0.02	0.03	0.02	-0.48	0.01	0.44	0.02	-0.03	0.02	0	0	0	0	0	0	-0.48	0.01	0.44	0.02	-0.03	0.02	0.01	0	-0.01
	176	177	ALA	412	0	0	0	0	0	0	0	0	0	0	0	0	-0.02	0	0.07	0.02	0.06	0.02	-0.02	0	0.07	0.02	0.06	0.02	0.02	0	-0.07	0.02	-0.06	0.02	0	0	0	0	0	0	0.02	0	-0.07	0.02	-0.06	0.02	0	0	0
	177	178	TYR	413	0	0	0	0	0	0	0	0	0	0	0	0	0.14	0.01	-0.13	0.01	0.01	0.02	0.14	0.01	-0.13	0.01	0.01	0.02	-0.14	0.01	0.13	0.01	-0.01	0.02	0	0	0	0	0	0	-0.14	0.01	0.13	0.01	-0.01	0.02	0	0	0
	178	179	ASN	414	0	0	0	0	0	0	0	0	0	0	0	0	-0.19	0.1	0	0.04	-0.19	0.1	-0.19	0.1	0	0.04	-0.19	0.1	0.19	0.1	0	0.04	0.19	0.1	0	0	0	0	0	0	0.19	0.1	0	0.04	0.19	0.1	0	0	0
	179	180	LYS	415	0	0	0	0	0	0	0	0	0	0	0	0	6.03	0.33	-0.18	0.03	5.85	0.34	6.03	0.33	-0.18	0.03	5.85	0.34	-5.95	0.32	0.18	0.03	-5.77	0.33	0	0	0	0	0	0	-5.95	0.32	0.18	0.03	-5.77	0.33	0.08	0	0
	180	181	PHE	416	0	0	0	0	0	0	0	0	0	0	0	0	0.15	0.02	-0.07	0.05	0.08	0.05	0.15	0.02	-0.07	0.05	0.08	0.05	-0.15	0.02	0.07	0.05	-0.08	0.05	0	0	0	0	0	0	-0.15	0.02	0.07	0.05	-0.08	0.05	0	0	0
	181	182	SER	417	0	0	0	0	0	0	0	0	0	0	0	0	0.36	0.04	-0.53	0.04	-0.18	0.07	0.36	0.04	-0.53	0.04	-0.18	0.07	-0.35	0.04	0.53	0.04	0.18	0.07	0	0	0	0	0	0	-0.35	0.04	0.53	0.04	0.18	0.07	0	0	-0.01
	182	183	ILE	418	0	0	0	0	0	0	0	0	0	0	0	0	0.73	0.02	-0.84	0.03	-0.11	0.03	0.73	0.02	-0.84	0.03	-0.11	0.03	-0.72	0.02	0.83	0.03	0.11	0.03	0	0	0	0	0	0	-0.72	0.02	0.83	0.03	0.11	0.03	0.01	0	-0.01
	183	184	LYS	419	0	0	0	0	0	0	0	0	0	0	0	0	6.37	0.12	-0.15	0.03	6.23	0.12	6.37	0.12	-0.15	0.03	6.23	0.12	-6.29	0.12	0.14	0.03	-6.15	0.12	0	0	0	0	0	0	-6.29	0.12	0.14	0.03	-6.15	0.12	0.08	0	0
	184	185	SER	420	0	0	0	0	0	0	0	0	0	0	0	0	0.42	0.02	-0.38	0.03	0.04	0.03	0.42	0.02	-0.38	0.03	0.04	0.03	-0.41	0.02	0.38	0.03	-0.04	0.03	0	0	0	0	0	0	-0.41	0.02	0.38	0.03	-0.04	0.03	0.01	0	-0.01
	185	186	ASP	421	0	0	0	0	0	0	0	0	0	0	0	0	-9.04	0.21	-1.26	0.03	-10.29	0.22	-9.04	0.21	-1.26	0.03	-10.3	0.22	8.93	0.2	1.24	0.03	10.17	0.22	0	0	0	0	0	0	8.93	0.2	1.24	0.03	10.17	0.22	-0.11	0	-0.02
	186	187	VAL	422	0	0	0	0	0	0	0	0	0	0	0	0	0.79	0.01	-0.86	0.03	-0.07	0.03	0.79	0.01	-0.86	0.03	-0.07	0.03	-0.78	0.01	0.85	0.03	0.07	0.03	0	0	0	0	0	0	-0.78	0.01	0.85	0.03	0.07	0.03	0.01	0	-0.01
	187	188	TRP	423	0	0	0	0	0	0	0	0	0	0	0	0	0.28	0.01	-0.17	0.02	0.11	0.02	0.28	0.01	-0.17	0.02	0.11	0.02	-0.28	0.01	0.16	0.02	-0.11	0.02	0	0	0	0	0	0	-0.28	0.01	0.16	0.02	-0.11	0.02	0	0	0
	188	189	ALA	424	0	0	0	0	0	0	0	0	0	0	0	0	0.01	0	0.07	0.04	0.08	0.04	0.01	0	0.07	0.04	0.08	0.04	-0.01	0	-0.07	0.03	-0.08	0.04	0	0	0	0	0	0	-0.01	0	-0.07	0.03	-0.08	0.04	0	0	0
	189	190	PHE	425	0	0	0	0	0	0	0	0	0	0	0	0	0.16	0.01	-0.15	0.03	0.01	0.03	0.16	0.01	-0.15	0.03	0.01	0.03	-0.16	0.01	0.15	0.03	-0.01	0.03	0	0	0	0	0	0	-0.16	0.01	0.15	0.03	-0.01	0.03	0	0	0
	190	191	GLY	426	0	0	0	0	0	0	0	0	0	0	0	0	0	0	0.04	0.02	0.04	0.02	0	0	0.04	0.02	0.04	0.02	0	0	-0.03	0.02	-0.03	0.02	0	0	0	0	0	0	0	0	-0.03	0.02	-0.03	0.02	0	0	0
	191	192	VAL	427	0	0	0	0	0	0	0	0	0	0	0	0	0.81	0.02	-0.68	0.03	0.13	0.02	0.81	0.02	-0.68	0.03	0.13	0.02	-0.8	0.02	0.67	0.02	-0.13	0.02	0	0	0	0	0	0	-0.8	0.02	0.67	0.02	-0.13	0.02	0.01	0	-0.01
	192	193	LEU	428	0	0	0	0	0	0	0	0	0	0	0	0	0.71	0.02	-0.56	0.03	0.16	0.03	0.71	0.02	-0.56	0.03	0.15	0.03	-0.71	0.02	0.55	0.03	-0.16	0.03	0	0	0	0	0	0	-0.71	0.02	0.55	0.03	-0.16	0.03	0.01	0	-0.01
	193	194	LEU	429	0	0	0	0	0	0	0	0	0	0	0	0	0.54	0.01	-0.5	0.03	0.04	0.03	0.54	0.01	-0.5	0.03	0.04	0.03	-0.53	0.01	0.49	0.03	-0.04	0.03	0	0	0	0	0	0	-0.53	0.01	0.49	0.03	-0.04	0.03	0.01	0	-0.01
	194	195	TRP	430	0	0	0	0	0	0	0	0	0	0	0	0	0.11	0.01	-0.1	0.01	0.01	0.02	0.11	0.01	-0.1	0.01	0.01	0.02	-0.11	0.01	0.1	0.01	-0.01	0.02	0	0	0	0	0	0	-0.11	0.01	0.1	0.01	-0.01	0.02	0	0	0
	195	196	GLU	431	0	0	0	0	0	0	0	0	0	0	0	0	-8.38	0.2	-0.77	0.03	-9.15	0.22	-8.38	0.2	-0.77	0.03	-9.15	0.22	8.28	0.2	0.76	0.03	9.04	0.21	0	0	0	0	0	0	8.28	0.2	0.76	0.03	9.04	0.21	-0.1	0	-0.01
	196	197	ILE	432	0	0	0	0	0	0	0	0	0	0	0	0	0.69	0.01	-0.6	0.02	0.09	0.02	0.69	0.01	-0.6	0.02	0.09	0.02	-0.68	0.01	0.59	0.02	-0.09	0.02	0	0	0	0	0	0	-0.68	0.01	0.59	0.02	-0.09	0.02	0.01	0	-0.01
	197	198	ALA	433	0	0	0	0	0	0	0	0	0	0	0	0	-0.02	0	0.11	0.02	0.09	0.02	-0.02	0	0.11	0.02	0.09	0.02	0.02	0	-0.11	0.02	-0.09	0.02	0	0	0	0	0	0	0.02	0	-0.11	0.02	-0.09	0.02	0	0	0
	198	199	THR	434	0	0	0	0	0	0	0	0	0	0	0	0	0.26	0.02	-0.26	0.02	0	0.03	0.26	0.02	-0.26	0.02	0	0.03	-0.26	0.02	0.26	0.02	0	0.03	0	0	0	0	0	0	-0.26	0.02	0.26	0.02	0	0.03	0	0	0
	199	200	TYR	435	0	0	0	0	0	0	0	0	0	0	0	0	0.14	0.01	-0.11	0.03	0.04	0.03	0.14	0.01	-0.11	0.03	0.03	0.03	-0.14	0.01	0.11	0.03	-0.03	0.03	0	0	0	0	0	0	-0.14	0.01	0.11	0.03	-0.03	0.03	0	0	0
	200	201	GLY	436	0	0	0	0	0	0	0	0	0	0	0	0	0	0	0.01	0.04	0.01	0.04	0	0	0.01	0.04	0.01	0.04	0	0	-0.01	0.04	-0.01	0.04	0	0	0	0	0	0	0	0	-0.01	0.04	-0.01	0.04	0	0	0
	201	202	MET	437	0	0	0	0	0	0	0	0	0	0	0	0	0.34	0.03	-0.52	0.03	-0.18	0.04	0.34	0.03	-0.52	0.03	-0.18	0.04	-0.34	0.03	0.52	0.03	0.18	0.04	0	0	0	0	0	0	-0.34	0.03	0.52	0.03	0.18	0.04	0	0	-0.01
	202	203	SER	438	0	0	0	0	0	0	0	0	0	0	0	0	0.33	0.08	-0.22	0.01	0.11	0.08	0.33	0.08	-0.22	0.01	0.11	0.08	-0.33	0.08	0.22	0.01	-0.11	0.08	0	0	0	0	0	0	-0.33	0.08	0.22	0.01	-0.11	0.08	0.01	0	0
	203	204	PRO	439	0	0	0	0	0	0	0	0	0	0	0	0	1.52	0.03	-1.49	0.04	0.03	0.03	1.52	0.03	-1.49	0.04	0.03	0.03	-1.5	0.03	1.47	0.03	-0.03	0.03	0	0	0	0	0	0	-1.5	0.03	1.47	0.03	-0.03	0.03	0.02	0	-0.02
	204	205	TYR	440	0	0	0	0	0	0	0	0	0	0	0	0	0.26	0.01	-0.23	0.02	0.03	0.03	0.26	0.01	-0.23	0.02	0.03	0.03	-0.26	0.01	0.22	0.02	-0.03	0.03	0	0	0	0	0	0	-0.26	0.01	0.22	0.02	-0.03	0.03	0	0	0
	205	206	PRO	441	0	0	0	0	0	0	0	0	0	0	0	0	1.16	0.02	-1.11	0.03	0.05	0.02	1.16	0.02	-1.11	0.03	0.05	0.02	-1.14	0.02	1.1	0.03	-0.05	0.02	0	0	0	0	0	0	-1.14	0.02	1.1	0.03	-0.05	0.02	0.01	0	-0.01
	206	207	GLY	442	0	0	0	0	0	0	0	0	0	0	0	0	0	0	0.07	0.02	0.07	0.02	0	0	0.07	0.02	0.07	0.02	0	0	-0.07	0.02	-0.07	0.02	0	0	0	0	0	0	0	0	-0.07	0.02	-0.07	0.02	0	0	0
	207	208	ILE	443	0	0	0	0	0	0	0	0	0	0	0	0	0.46	0.01	-0.54	0.02	-0.09	0.02	0.46	0.01	-0.54	0.02	-0.09	0.02	-0.45	0.01	0.54	0.02	0.09	0.02	0	0	0	0	0	0	-0.45	0.01	0.54	0.02	0.09	0.02	0.01	0	-0.01
	208	209	ASP	444	0	0	0	0	0	0	0	0	0	0	0	0	-4.71	0.17	-0.77	0.02	-5.48	0.17	-4.71	0.17	-0.77	0.02	-5.48	0.17	4.65	0.16	0.76	0.02	5.41	0.16	0	0	0	0	0	0	4.65	0.16	0.76	0.02	5.41	0.16	-0.06	0	-0.01
	209	210	LEU	445	0	0	0	0	0	0	0	0	0	0	0	0	0.48	0.02	-0.47	0.02	0.01	0.03	0.48	0.02	-0.47	0.02	0.01	0.03	-0.48	0.02	0.47	0.02	-0.01	0.03	0	0	0	0	0	0	-0.48	0.02	0.47	0.02	-0.01	0.03	0.01	0	-0.01
	210	211	SER	446	0	0	0	0	0	0	0	0	0	0	0	0	0.37	0.01	-0.28	0.02	0.09	0.02	0.37	0.01	-0.28	0.02	0.09	0.02	-0.36	0.01	0.28	0.02	-0.08	0.02	0	0	0	0	0	0	-0.36	0.01	0.28	0.02	-0.08	0.02	0	0	0
	211	212	GLN	447	0	0	0	0	0	0	0	0	0	0	0	0	0.12	0.03	-0.1	0.01	0.02	0.03	0.12	0.03	-0.1	0.01	0.02	0.03	-0.12	0.03	0.1	0.01	-0.02	0.03	0	0	0	0	0	0	-0.12	0.03	0.1	0.01	-0.02	0.03	0	0	0
	212	213	VAL	448	0	0	0	0	0	0	0	0	0	0	0	0	0.63	0.01	-0.52	0.02	0.11	0.02	0.63	0.01	-0.52	0.02	0.11	0.02	-0.62	0.01	0.51	0.02	-0.11	0.02	0	0	0	0	0	0	-0.62	0.01	0.51	0.02	-0.11	0.02	0.01	0	-0.01
	213	214	TYR	449	0	0	0	0	0	0	0	0	0	0	0	0	0.13	0.01	-0.11	0.01	0.02	0.02	0.13	0.01	-0.11	0.01	0.02	0.02	-0.13	0.01	0.1	0.01	-0.02	0.02	0	0	0	0	0	0	-0.13	0.01	0.1	0.01	-0.02	0.02	0	0	0
	214	215	GLU	450	0	0	0	0	0	0	0	0	0	0	0	0	-4.11	0.11	-0.54	0.01	-4.64	0.11	-4.11	0.11	-0.54	0.01	-4.64	0.11	4.06	0.11	0.53	0.01	4.59	0.11	0	0	0	0	0	0	4.06	0.11	0.53	0.01	4.59	0.11	-0.05	0	-0.01
	215	216	LEU	451	0	0	0	0	0	0	0	0	0	0	0	0	0.38	0.01	-0.29	0.01	0.09	0.01	0.38	0.01	-0.29	0.01	0.09	0.01	-0.37	0.01	0.28	0.01	-0.09	0.01	0	0	0	0	0	0	-0.37	0.01	0.28	0.01	-0.09	0.01	0	0	0
	216	217	LEU	452	0	0	0	0	0	0	0	0	0	0	0	0	0.42	0.01	-0.33	0.01	0.09	0.01	0.42	0.01	-0.33	0.01	0.09	0.01	-0.42	0.01	0.33	0.01	-0.09	0.01	0	0	0	0	0	0	-0.42	0.01	0.33	0.01	-0.09	0.01	0.01	0	0
	217	218	GLU	453	0	0	0	0	0	0	0	0	0	0	0	0	-4.15	0.18	-0.53	0.01	-4.68	0.18	-4.15	0.18	-0.53	0.01	-4.68	0.18	4.1	0.17	0.52	0.01	4.62	0.18	0	0	0	0	0	0	4.1	0.17	0.52	0.01	4.62	0.18	-0.05	0	-0.01
	218	219	LYS	454	0	0	0	0	0	0	0	0	0	0	0	0	4.47	0.11	-0.06	0.01	4.41	0.11	4.47	0.11	-0.06	0.01	4.41	0.11	-4.42	0.11	0.06	0.01	-4.36	0.11	0	0	0	0	0	0	-4.42	0.11	0.06	0.01	-4.36	0.11	0.06	0	0
	219	220	ASP	455	0	0	0	0	0	0	0	0	0	0	0	0	-4.05	0.08	-0.6	0.02	-4.65	0.09	-4.05	0.08	-0.6	0.02	-4.65	0.09	4	0.08	0.6	0.02	4.6	0.09	0	0	0	0	0	0	4	0.08	0.6	0.02	4.6	0.09	-0.05	0	-0.01
	220	221	TYR	456	0	0	0	0	0	0	0	0	0	0	0	0	0.2	0.01	-0.21	0.02	-0.01	0.02	0.2	0.01	-0.21	0.02	-0.01	0.02	-0.2	0.01	0.21	0.01	0.01	0.02	0	0	0	0	0	0	-0.2	0.01	0.21	0.01	0.01	0.02	0	0	0
	221	222	ARG	457	0	0	0	0	0	0	0	0	0	0	0	0	5.36	0.08	-0.09	0.01	5.27	0.08	5.36	0.08	-0.09	0.01	5.27	0.08	-5.29	0.08	0.09	0.01	-5.21	0.08	0	0	0	0	0	0	-5.29	0.08	0.09	0.01	-5.21	0.08	0.07	0	0
	222	223	MET	458	0	0	0	0	0	0	0	0	0	0	0	0	0.28	0.02	-0.23	0.02	0.04	0.03	0.28	0.02	-0.23	0.02	0.04	0.03	-0.27	0.02	0.23	0.02	-0.04	0.03	0	0	0	0	0	0	-0.27	0.02	0.23	0.02	-0.04	0.03	0	0	0
	223	224	GLU	459	0	0	0	0	0	0	0	0	0	0	0	0	-4.15	0.13	-0.75	0.02	-4.9	0.14	-4.15	0.13	-0.75	0.02	-4.9	0.14	4.1	0.13	0.74	0.02	4.84	0.14	0	0	0	0	0	0	4.1	0.13	0.74	0.02	4.84	0.14	-0.05	0	-0.01
	224	225	ARG	460	0	0	0	0	0	0	0	0	0	0	0	0	4.9	0.07	-0.1	0.01	4.8	0.07	4.9	0.07	-0.1	0.01	4.8	0.07	-4.84	0.06	0.1	0.01	-4.74	0.06	0	0	0	0	0	0	-4.84	0.06	0.1	0.01	-4.74	0.06	0.06	0	0
	225	226	PRO	461	0	0	0	0	0	0	0	0	0	0	0	0	1.17	0.02	-1.07	0.02	0.09	0.02	1.17	0.02	-1.07	0.02	0.09	0.02	-1.15	0.02	1.06	0.02	-0.09	0.02	0	0	0	0	0	0	-1.15	0.02	1.06	0.02	-0.09	0.02	0.01	0	-0.01
	226	227	GLU	462	0	0	0	0	0	0	0	0	0	0	0	0	-4.2	0.13	-0.75	0.02	-4.95	0.15	-4.2	0.13	-0.75	0.02	-4.95	0.15	4.15	0.13	0.74	0.02	4.89	0.14	0	0	0	0	0	0	4.15	0.13	0.74	0.02	4.89	0.14	-0.05	0	-0.01
	227	228	GLY	463	0	0	0	0	0	0	0	0	0	0	0	0	0	0	-0.06	0.02	-0.06	0.02	0	0	-0.06	0.02	-0.06	0.02	0	0	0.06	0.02	0.06	0.02	0	0	0	0	0	0	0	0	0.06	0.02	0.06	0.02	0	0	0
	228	229	CYS	464	0	0	0	0	0	0	0	0	0	0	0	0	-0.11	0.03	0.21	0.01	0.1	0.03	-0.11	0.03	0.21	0.01	0.1	0.03	0.11	0.03	-0.21	0.01	-0.09	0.03	0	0	0	0	0	0	0.11	0.03	-0.21	0.01	-0.09	0.03	0	0	0
	229	230	PRO	465	0	0	0	0	0	0	0	0	0	0	0	0	1.1	0.02	-1.18	0.02	-0.08	0.01	1.1	0.02	-1.18	0.02	-0.08	0.01	-1.09	0.02	1.17	0.02	0.08	0.01	0	0	0	0	0	0	-1.09	0.02	1.17	0.02	0.08	0.01	0.01	0	-0.01
	230	231	GLU	466	0	0	0	0	0	0	0	0	0	0	0	0	-3.8	0.07	-0.64	0.02	-4.44	0.08	-3.8	0.07	-0.64	0.02	-4.44	0.08	3.75	0.07	0.63	0.02	4.39	0.08	0	0	0	0	0	0	3.75	0.07	0.63	0.02	4.39	0.08	-0.05	0	-0.01
	231	232	LYS	467	0	0	0	0	0	0	0	0	0	0	0	0	4.83	0.11	-0.16	0.01	4.67	0.11	4.83	0.11	-0.16	0.01	4.67	0.11	-4.77	0.11	0.16	0.01	-4.61	0.11	0	0	0	0	0	0	-4.77	0.11	0.16	0.01	-4.61	0.11	0.06	0	0
	232	233	VAL	468	0	0	0	0	0	0	0	0	0	0	0	0	0.61	0.01	-0.67	0.02	-0.05	0.02	0.61	0.01	-0.67	0.02	-0.05	0.02	-0.61	0.01	0.66	0.02	0.05	0.01	0	0	0	0	0	0	-0.61	0.01	0.66	0.02	0.05	0.01	0.01	0	-0.01
	233	234	TYR	469	0	0	0	0	0	0	0	0	0	0	0	0	0.11	0.01	-0.21	0.01	-0.11	0.02	0.11	0.01	-0.21	0.01	-0.11	0.02	-0.1	0.01	0.21	0.01	0.11	0.02	0	0	0	0	0	0	-0.1	0.01	0.21	0.01	0.11	0.02	0	0	0
	234	235	GLU	470	0	0	0	0	0	0	0	0	0	0	0	0	-4.22	0.09	-0.65	0.02	-4.87	0.09	-4.22	0.09	-0.65	0.02	-4.87	0.09	4.17	0.09	0.64	0.02	4.81	0.09	0	0	0	0	0	0	4.17	0.09	0.64	0.02	4.81	0.09	-0.05	0	-0.01
	235	236	LEU	471	0	0	0	0	0	0	0	0	0	0	0	0	0.45	0.01	-0.46	0.02	-0.01	0.02	0.45	0.01	-0.46	0.02	-0.01	0.02	-0.44	0.01	0.45	0.02	0.01	0.02	0	0	0	0	0	0	-0.44	0.01	0.45	0.02	0.01	0.02	0.01	0	-0.01
	236	237	MET	472	0	0	0	0	0	0	0	0	0	0	0	0	0.33	0.03	-0.36	0.01	-0.03	0.03	0.33	0.03	-0.36	0.01	-0.03	0.03	-0.33	0.03	0.36	0.01	0.03	0.03	0	0	0	0	0	0	-0.33	0.03	0.36	0.01	0.03	0.03	0	0	0
	237	238	ARG	473	0	0	0	0	0	0	0	0	0	0	0	0	4.91	0.07	-0.2	0.02	4.71	0.07	4.91	0.07	-0.2	0.02	4.71	0.07	-4.85	0.07	0.2	0.02	-4.65	0.07	0	0	0	0	0	0	-4.85	0.07	0.2	0.02	-4.65	0.07	0.06	0	0
	238	239	ALA	474	0	0	0	0	0	0	0	0	0	0	0	0	-0.01	0	0.02	0.01	0.02	0.01	-0.01	0	0.02	0.01	0.02	0.01	0.01	0	-0.02	0.01	-0.01	0.01	0	0	0	0	0	0	0.01	0	-0.02	0.01	-0.01	0.01	0	0	0
	239	240	CYS	475	0	0	0	0	0	0	0	0	0	0	0	0	-0.18	0.02	0.1	0.02	-0.08	0.03	-0.18	0.02	0.1	0.02	-0.08	0.03	0.18	0.02	-0.1	0.02	0.08	0.03	0	0	0	0	0	0	0.18	0.02	-0.1	0.02	0.08	0.03	0	0	0
	240	241	TRP	476	0	0	0	0	0	0	0	0	0	0	0	0	0.29	0.01	-0.11	0.01	0.18	0.02	0.29	0.01	-0.11	0.01	0.18	0.02	-0.29	0.01	0.11	0.01	-0.18	0.02	0	0	0	0	0	0	-0.29	0.01	0.11	0.01	-0.18	0.02	0	0	0
	241	242	GLN	477	0	0	0	0	0	0	0	0	0	0	0	0	0.18	0.03	-0.3	0.01	-0.13	0.03	0.18	0.03	-0.3	0.01	-0.13	0.03	-0.17	0.03	0.3	0.01	0.13	0.03	0	0	0	0	0	0	-0.17	0.03	0.3	0.01	0.13	0.03	0	0	0
	242	243	TRP	478	0	0	0	0	0	0	0	0	0	0	0	0	0.12	0.02	-0.27	0.01	-0.15	0.02	0.12	0.02	-0.27	0.01	-0.15	0.02	-0.12	0.01	0.27	0.01	0.15	0.02	0	0	0	0	0	0	-0.12	0.01	0.27	0.01	0.15	0.02	0	0	0
	243	244	ASN	479	0	0	0	0	0	0	0	0	0	0	0	0	-0.15	0.03	0	0.01	-0.14	0.03	-0.15	0.03	0	0.01	-0.14	0.03	0.14	0.03	0	0.01	0.14	0.03	0	0	0	0	0	0	0.14	0.03	0	0.01	0.14	0.03	0	0	0
	244	245	PRO	480	0	0	0	0	0	0	0	0	0	0	0	0	1.19	0.02	-1.22	0.02	-0.02	0.02	1.19	0.02	-1.22	0.02	-0.02	0.02	-1.18	0.02	1.2	0.02	0.02	0.02	0	0	0	0	0	0	-1.18	0.02	1.2	0.02	0.02	0.02	0.01	0	-0.02
	245	246	SER	481	0	0	0	0	0	0	0	0	0	0	0	0	0.24	0.03	-0.31	0.03	-0.07	0.04	0.24	0.03	-0.31	0.03	-0.07	0.04	-0.24	0.03	0.3	0.03	0.07	0.04	0	0	0	0	0	0	-0.24	0.03	0.3	0.03	0.07	0.04	0	0	0
	246	247	ASP	482	0	0	0	0	0	0	0	0	0	0	0	0	-4.15	0.05	-0.73	0.02	-4.88	0.06	-4.15	0.05	-0.73	0.02	-4.88	0.06	4.09	0.05	0.73	0.02	4.82	0.06	0	0	0	0	0	0	4.09	0.05	0.73	0.02	4.82	0.06	-0.05	0	-0.01
	247	248	ARG	483	0	0	0	0	0	0	0	0	0	0	0	0	6.62	0.1	-0.18	0.02	6.44	0.09	6.62	0.1	-0.18	0.02	6.44	0.09	-6.53	0.09	0.18	0.02	-6.36	0.09	0	0	0	0	0	0	-6.53	0.09	0.18	0.02	-6.36	0.09	0.08	0	0
	248	249	PRO	484	0	0	0	0	0	0	0	0	0	0	0	0	1.21	0.02	-1.34	0.02	-0.13	0.02	1.21	0.02	-1.34	0.02	-0.13	0.02	-1.2	0.02	1.33	0.02	0.13	0.02	0	0	0	0	0	0	-1.2	0.02	1.33	0.02	0.13	0.02	0.02	0	-0.02
	249	250	SER	485	0	0	0	0	0	0	0	0	0	0	0	0	0.34	0.03	-0.27	0.01	0.07	0.03	0.34	0.03	-0.27	0.01	0.07	0.03	-0.34	0.03	0.26	0.01	-0.07	0.03	0	0	0	0	0	0	-0.34	0.03	0.26	0.01	-0.07	0.03	0	0	0
	250	251	PHE	486	0	0	0	0	0	0	0	0	0	0	0	0	0.16	0.02	-0.09	0.02	0.07	0.03	0.16	0.02	-0.09	0.02	0.07	0.03	-0.16	0.02	0.09	0.02	-0.07	0.03	0	0	0	0	0	0	-0.16	0.02	0.09	0.02	-0.07	0.03	0	0	0
	251	252	ALA	487	0	0	0	0	0	0	0	0	0	0	0	0	-0.02	0	0.03	0.02	0.01	0.02	-0.02	0	0.03	0.02	0.01	0.02	0.02	0	-0.03	0.02	-0.01	0.02	0	0	0	0	0	0	0.02	0	-0.03	0.02	-0.01	0.02	0	0	0
	252	253	GLU	488	0	0	0	0	0	0	0	0	0	0	0	0	-4.92	0.1	-0.68	0.02	-5.6	0.11	-4.92	0.1	-0.68	0.02	-5.6	0.11	4.86	0.1	0.67	0.02	5.53	0.11	0	0	0	0	0	0	4.86	0.1	0.67	0.02	5.53	0.11	-0.06	0	-0.01
	253	254	ILE	489	0	0	0	0	0	0	0	0	0	0	0	0	0.61	0.01	-0.47	0.02	0.15	0.02	0.61	0.01	-0.47	0.02	0.15	0.02	-0.61	0.01	0.46	0.02	-0.14	0.02	0	0	0	0	0	0	-0.61	0.01	0.46	0.02	-0.14	0.02	0.01	0	-0.01
	254	255	HIS	490	0	0	0	0	0	0	0	0	0	0	0	0	0.33	0.07	-0.18	0.01	0.15	0.06	0.33	0.07	-0.18	0.01	0.15	0.06	-0.32	0.06	0.18	0.01	-0.14	0.06	0	0	0	0	0	0	-0.32	0.06	0.18	0.01	-0.14	0.06	0.01	0	0
	255	256	GLN	491	0	0	0	0	0	0	0	0	0	0	0	0	0.16	0.07	-0.15	0.01	0.01	0.07	0.16	0.07	-0.15	0.01	0.01	0.07	-0.16	0.07	0.15	0.01	-0.01	0.07	0	0	0	0	0	0	-0.16	0.07	0.15	0.01	-0.01	0.07	0	0	0
	256	257	ALA	492	0	0	0	0	0	0	0	0	0	0	0	0	-0.01	0	0.1	0.01	0.09	0.01	-0.01	0	0.1	0.01	0.09	0.01	0.01	0	-0.1	0.01	-0.09	0.01	0	0	0	0	0	0	0.01	0	-0.1	0.01	-0.09	0.01	0	0	0
	257	258	PHE	493	0	0	0	0	0	0	0	0	0	0	0	0	0.12	0.01	-0.02	0.02	0.11	0.02	0.12	0.01	-0.02	0.02	0.11	0.02	-0.12	0.01	0.02	0.02	-0.11	0.02	0	0	0	0	0	0	-0.12	0.01	0.02	0.02	-0.11	0.02	0	0	0
	258	259	GLU	494	0	0	0	0	0	0	0	0	0	0	0	0	-5.59	0.21	-0.63	0.02	-6.22	0.22	-5.59	0.21	-0.63	0.02	-6.22	0.22	5.52	0.21	0.62	0.02	6.14	0.22	0	0	0	0	0	0	5.52	0.21	0.62	0.02	6.14	0.22	-0.07	0	-0.01
	259	260	THR	495	0	0	0	0	0	0	0	0	0	0	0	0	0.32	0.03	-0.21	0.01	0.12	0.03	0.32	0.03	-0.21	0.01	0.11	0.03	-0.32	0.03	0.21	0.01	-0.11	0.03	0	0	0	0	0	0	-0.32	0.03	0.21	0.01	-0.11	0.03	0	0	0
	260	261	MET	496	0	0	0	0	0	0	0	0	0	0	0	0	0.3	0.04	-0.19	0.02	0.11	0.04	0.3	0.04	-0.19	0.02	0.11	0.04	-0.3	0.04	0.19	0.02	-0.11	0.04	0	0	0	0	0	0	-0.3	0.04	0.19	0.02	-0.11	0.04	0	0	0
	261	262	PHE	497	0	0	0	0	0	0	0	0	0	0	0	0	0.11	0.01	-0.11	0.04	0.01	0.04	0.11	0.01	-0.11	0.04	0.01	0.04	-0.11	0.01	0.1	0.04	-0.01	0.04	0	0	0	0	0	0	-0.11	0.01	0.1	0.04	-0.01	0.04	0	0	0
	262	263	GLN	498	0	0	0	0	0	0	0	0	0	0	0	0	-7.73	0.29	2.79	0.1	-4.94	0.19	-7.73	0.29	2.79	0.1	-4.94	0.19	7.64	0.29	-2.76	0.1	4.88	0.19	0	0	0	0	0	0	7.64	0.29	-2.76	0.1	4.88	0.19	-0.1	0	0.03
	263	264	LIG	499	0	0	0	0	0	0	-11.34	1.27	0	0	-11.34	1.27	-69.49	4.84	0	0	-69.49	4.84	-80.83	4.94	0	0	-80.83	4.94	71.56	4.64	0	0	71.56	4.64	-2.54	0.04	0	0	-2.54	0.04	69.02	4.63	0	0	69.02	4.63	-11.81	1.16	0
[truncated: 3 more columns]

## Sheet: wt_chlorhexidine
=>>	COMPLEX
	Number	Residue	Residue Name	Residue ID	SINT		BINT		TINT		SVDW		BVDW		TVDW		SELE		BELE		TELE		SGAS		BGAS		TGAS		SGB		BGB		TGB		SGBSUR		BGBSUR		TGBSUR		SGBSOL		BGBSOL		TGBSOL		SGBTOT		BGBTOT
	0	1	TRP	235	12.39	2.44	4.01	1	16.4	2.75	-4.08	0.78	-1.83	0.53	-5.91	0.88	-19.23	5.21	-22.85	1.35	-42.07	6.28	-10.91	5.88	-20.67	1.53	-31.58	6.86	-40.6	5.09	-6.85	1.06	-47.45	5.99	1.08	0.08	0.01	0.01	1.09	0.08	-39.51	5.1	-6.84	1.06	-46.36	6	-50.43	2.63	-27.51
	1	2	GLU	236	6.28	2.02	9.43	1.19	15.71	2.41	-0.78	0.85	-0.09	0.62	-0.87	1.09	-12.93	4.6	-4.21	1.47	-17.14	4.97	-7.43	4.72	5.13	1.87	-2.31	5.13	-50.9	4.92	-3.17	1.31	-54.06	5.39	0.72	0.05	0.21	0.02	0.93	0.04	-50.18	4.91	-2.96	1.3	-53.14	5.37	-57.61	1.89	2.17
	2	3	MET	237	7.08	1.9	10.04	1.31	17.12	2.3	-5.61	0.92	-0.81	0.73	-6.42	1.26	-0.48	0.75	-9.47	1.13	-9.96	1.48	0.98	2.06	-0.24	1.78	0.74	2.75	0.18	0.57	-2.61	0.73	-2.42	0.97	0.11	0.04	0.09	0.02	0.2	0.04	0.29	0.57	-2.52	0.73	-2.23	0.97	1.27	1.99	-2.76
	3	4	GLU	238	6.64	1.83	10.08	1.24	16.72	2.36	-0.79	0.9	-1.27	0.82	-2.06	1.37	-25.05	4.38	1.93	1.45	-23.13	4.3	-19.21	4.48	10.74	1.87	-8.47	4.82	-38.44	3.92	-4.5	0.95	-42.94	3.99	0.5	0.05	0.04	0.02	0.53	0.06	-37.94	3.92	-4.47	0.94	-42.41	3.99	-57.15	1.72	6.27
	4	5	ARG	239	13.26	2.7	11.04	1.35	24.31	2.98	-2.73	1.35	-1.76	0.56	-4.5	1.45	-192.63	4.47	-4.98	0.88	-197.61	4.53	-182.1	5.02	4.3	1.46	-177.8	5.11	4.04	4.19	-4.16	0.83	-0.12	4.2	0.69	0.1	0.05	0.02	0.75	0.1	4.74	4.14	-4.11	0.83	0.63	4.15	-177.36	2.65	0.2
	5	6	THR	240	6.74	1.6	10.26	1.42	17	2.24	-0.44	0.64	0.9	0.92	0.46	1.32	-20.48	1	-23.78	2.55	-44.26	2.52	-14.18	1.91	-12.63	2.59	-26.8	3.25	-3.85	0.79	0.55	1.94	-3.3	1.84	0.65	0.06	0.09	0.04	0.73	0.08	-3.21	0.79	0.64	1.91	-2.56	1.81	-17.38	1.84	-11.98
	6	7	ASP	241	5.19	1.65	9.86	1.35	15.05	2.24	-2.7	0.68	-0.78	1.02	-3.48	1.24	-30.08	7.86	-9.99	1.61	-40.07	8.47	-27.59	7.96	-0.91	2.12	-28.5	8.62	-30.61	7.83	-1.68	1.44	-32.28	8.3	0.22	0.06	0.02	0.01	0.24	0.06	-30.38	7.79	-1.66	1.44	-32.04	8.26	-57.97	2.12	-2.57
	7	8	ILE	242	9.32	2.13	9.68	1.33	19	2.52	-4.15	0.98	-0.53	0.92	-4.68	1.41	-3.87	0.36	-7.6	1.51	-11.47	1.43	1.29	2.31	1.55	2	2.84	3.21	1.7	0.3	-3.72	1.29	-2.02	1.18	0	0.01	0.05	0.02	0.05	0.02	1.71	0.3	-3.68	1.29	-1.97	1.18	3	2.25	-2.13
	8	9	THR	243	6.22	1.49	10.5	1.34	16.72	2.15	-0.99	0.57	-1.02	0.81	-2.01	1.1	-21.56	2.17	-12.91	1.5	-34.47	2.68	-16.32	2.42	-3.44	1.89	-19.76	3.2	-2.23	1.71	-2.09	1.06	-4.33	1.92	0.39	0.06	0.03	0.01	0.42	0.06	-1.84	1.72	-2.07	1.06	-3.91	1.93	-18.16	1.64	-5.5
	9	10	MET	244	7.45	1.66	10.49	1.42	17.94	2.25	-5.32	0.73	-0.76	0.74	-6.07	1.14	-1.24	0.56	1.15	1.42	-0.09	1.63	0.89	1.94	10.88	2.15	11.77	2.84	0.72	0.44	-3.87	1.5	-3.14	1.63	0.2	0.05	0.19	0.03	0.39	0.06	0.92	0.41	-3.68	1.48	-2.76	1.59	1.82	1.79	7.2
	10	11	LYS	245	10.89	1.93	12.09	1.32	22.98	2.24	-1.48	1.01	0.07	0.81	-1.42	1.15	-13.05	14.99	-4.51	1.42	-17.56	14.27	-3.64	15.29	7.65	1.88	4	14.36	-13.68	14.1	-4.24	1.11	-17.92	13.4	0.86	0.15	0.26	0.04	1.12	0.14	-12.82	14	-3.98	1.08	-16.8	13.32	-16.46	2.41	3.66
	11	12	HIS	246	25.07	1.89	9.68	1.18	34.76	2.26	-2.4	0.62	-0.97	0.77	-3.36	1.08	-9.44	3.62	-6.69	1.83	-16.13	5.21	13.24	4.21	2.02	1.97	15.26	5.6	-6.84	3.23	-3.32	1.07	-10.16	4.09	0.91	0.09	0.05	0.02	0.96	0.08	-5.93	3.21	-3.27	1.08	-9.2	4.07	7.31	2.03	-1.25
	12	13	LYS	247	10.94	2.56	10.25	1.3	21.19	2.86	-2.57	0.93	-1.31	0.73	-3.88	1.21	-46.32	6.84	-1.97	1.47	-48.29	7.22	-37.95	7.27	6.97	2.1	-30.98	7.94	17.43	6.13	-5.07	1.35	12.35	6.56	0.6	0.08	0.08	0.05	0.68	0.1	18.02	6.08	-4.99	1.33	13.03	6.5	-19.93	2.77	1.98
	13	14	LEU	248	9.41	1.87	9.57	1.44	18.98	2.3	-3.2	0.85	-0.41	0.94	-3.61	1.4	-26.74	0.48	-6.03	1.05	-32.77	1.21	-20.53	2.08	3.12	1.78	-17.41	2.68	3.37	0.33	-5.77	0.79	-2.4	0.9	0.13	0.03	0.06	0.03	0.18	0.04	3.5	0.32	-5.71	0.78	-2.22	0.88	-17.03	2	-2.59
	14	15	GLY	249	0	0	8.58	1.64	8.58	1.64	0	0	-1.5	0.67	-1.5	0.67	0	0	-8.29	1.74	-8.29	1.74	0	0	-1.21	2.18	-1.21	2.18	0	0	-3.84	1.45	-3.84	1.45	0	0	0.29	0.05	0.29	0.05	0	0	-3.56	1.43	-3.56	1.43	0	0	-4.76
	15	16	GLY	250	0	0	8.23	1.5	8.23	1.5	0	0	-0.53	0.62	-0.53	0.62	0	0	-1.3	1.58	-1.3	1.58	0	0	6.4	2.11	6.4	2.11	0	0	-9.63	1.16	-9.63	1.16	0	0	0.56	0.05	0.56	0.05	0	0	-9.07	1.14	-9.07	1.14	0	0	-2.67
	16	17	GLY	251	0	0	9.37	1.45	9.37	1.45	0	0	-1.61	0.63	-1.61	0.63	0	0	-4.27	1.31	-4.27	1.31	0	0	3.48	2.02	3.48	2.02	0	0	-6.56	1.29	-6.56	1.29	0	0	0.28	0.09	0.28	0.09	0	0	-6.28	1.27	-6.28	1.27	0	0	-2.8
	17	18	GLN	252	13.22	2.16	10.21	1.35	23.43	2.71	-2.56	1.04	-1.19	0.86	-3.74	1.61	-68.09	3.78	-1	1.67	-69.09	4.74	-57.43	4.05	8.02	2.05	-49.4	5.12	-6.25	3.08	-6.56	0.8	-12.81	3.48	0.36	0.06	0.02	0.01	0.38	0.07	-5.89	3.09	-6.54	0.8	-12.42	3.49	-63.31	1.96	1.48
	18	19	TYR	253	8.45	1.98	9.55	1.3	18	2.49	-4.9	0.64	-2.06	0.61	-6.97	0.9	-20.08	1.32	-1.37	1.04	-21.45	1.68	-16.53	2.43	6.11	1.59	-10.42	3.2	-1.33	0.65	-5.17	0.6	-6.5	0.93	0.09	0.03	0.01	0.01	0.09	0.03	-1.24	0.64	-5.17	0.6	-6.41	0.92	-17.77	2.3	0.95
	19	20	GLY	254	0	0	8.91	1.25	8.91	1.25	0	0	-1.89	0.82	-1.89	0.82	0	0	-7.24	1.61	-7.24	1.61	0	0	-0.22	1.98	-0.22	1.98	0	0	-4.75	1.21	-4.75	1.21	0	0	0.09	0.03	0.09	0.03	0	0	-4.66	1.2	-4.66	1.2	0	0	-4.88
	20	21	GLU	255	6.43	1.74	11.08	1.56	17.51	2.67	-1.68	0.95	-1.77	0.7	-3.45	1.25	-11.6	6.45	-4.53	1.18	-16.13	6.49	-6.85	6.18	4.77	1.85	-2.08	6.36	-50.74	6.08	-5.67	0.42	-56.42	6.19	0.32	0.05	0.02	0.01	0.34	0.05	-50.42	6.06	-5.65	0.42	-56.08	6.17	-57.27	1.5	-0.88
	21	22	VAL	256	6.2	1.89	10.19	1.22	16.39	2.41	-3.81	0.6	-1.33	0.78	-5.15	1.12	-19.42	0.42	-9.58	0.96	-29	0.98	-17.04	1.89	-0.72	1.59	-17.76	2.56	4.26	0.33	-4.96	0.59	-0.7	0.45	0	0	0	0	0	0	4.27	0.33	-4.96	0.59	-0.7	0.45	-12.77	1.86	-5.69
	22	23	TYR	257	8.82	2.29	10.33	1.33	19.15	2.9	-3.88	0.67	-1.86	1.09	-5.74	1.38	-16.14	1.06	-12.08	0.95	-28.21	1.38	-11.2	2.62	-3.61	1.46	-14.8	3.07	-5.21	0.63	-1.78	0.47	-7	0.8	0.44	0.05	0	0	0.44	0.05	-4.77	0.64	-1.78	0.47	-6.56	0.81	-15.97	2.49	-5.39
	23	24	GLU	258	6.36	1.88	9.86	1.49	16.22	2.47	-2.9	0.74	-1.7	0.86	-4.6	1.13	18.98	10.98	-8.83	1.63	10.15	11.38	22.45	10.75	-0.67	1.82	21.78	11.19	-79.83	10.53	-2.58	0.71	-82.41	10.69	0.37	0.08	0	0	0.37	0.08	-79.46	10.47	-2.58	0.71	-82.04	10.62	-57.02	1.74	-3.25
	24	25	GLY	259	0	0	8.47	1.25	8.47	1.25	0	0	-3.25	0.72	-3.25	0.72	0	0	-6.29	1.12	-6.29	1.12	0	0	-1.08	1.59	-1.08	1.59	0	0	-4.26	0.92	-4.26	0.92	0	0	0.01	0.02	0.01	0.02	0	0	-4.25	0.91	-4.25	0.91	0	0	-5.32
	25	26	VAL	260	6.01	1.76	10.05	1.4	16.06	2.44	-1.97	0.69	-1.46	0.85	-3.43	1.23	-16.84	0.78	-12.24	1.19	-29.09	1.12	-12.8	1.76	-3.65	1.77	-16.46	2.41	1.7	0.58	-2.06	0.72	-0.36	0.61	0.31	0.08	0	0	0.31	0.08	2.01	0.64	-2.06	0.72	-0.05	0.62	-10.8	1.69	-5.71
	26	27	TRP	261	11.77	2.46	11.71	1.3	23.48	2.75	-6.43	0.9	-2.78	0.8	-9.2	1.22	6.11	2.54	-4.99	1.49	1.12	3.2	11.45	3.62	3.94	1.9	15.39	4.37	-1.4	1.47	-1.31	0.71	-2.71	1.89	0.25	0.07	0	0	0.25	0.07	-1.15	1.46	-1.31	0.71	-2.46	1.88	10.3	2.85	2.63
	27	28	LYS	262	11.41	2.02	12.86	1.76	24.27	2.88	-2.27	0.88	-1.15	0.66	-3.41	1.17	-6.21	5.99	1.17	1.69	-5.04	6.32	2.94	6.42	12.88	2.29	15.82	7.06	-20.37	5.97	-4.56	0.95	-24.93	5.98	0.72	0.07	0.13	0.03	0.85	0.08	-19.65	5.94	-4.43	0.94	-24.08	5.94	-16.71	2.1	8.45
	28	29	LYS	263	11.49	2.27	11.33	1.61	22.82	3.09	-1.95	1.21	-0.28	0.68	-2.24	1.4	-0.39	6.95	-8.62	1.74	-9.01	6.65	9.14	6.84	2.42	2.15	11.57	7.01	-26.82	6.46	-4.84	1.24	-31.65	6.12	0.84	0.15	0.26	0.04	1.09	0.14	-25.98	6.4	-4.58	1.23	-30.56	6.06	-16.84	2.51	-2.16
	29	30	TYR	264	8.66	2.07	9.72	1.63	18.37	2.81	-0.17	0.86	0.15	0.69	-0.02	1.16	-17.56	1.11	-8.39	0.91	-25.95	1.52	-9.08	2.59	1.47	1.63	-7.6	3.21	-4.96	0.92	-6.14	0.74	-11.1	1.17	0.86	0.09	0.2	0.03	1.05	0.08	-4.1	0.87	-5.95	0.73	-10.05	1.12	-13.18	2.29	-4.47
	30	31	SER	265	3.4	0.88	10.74	1.58	14.13	1.87	-0.11	0.41	-0.02	0.68	-0.13	0.84	-2.7	0.9	-3.53	1.54	-6.23	1.91	0.59	1.32	7.19	2.13	7.78	2.63	-2.92	0.87	-7.73	1.01	-10.65	1.34	0.55	0.04	0.17	0.04	0.72	0.05	-2.37	0.85	-7.57	0.99	-9.93	1.32	-1.78	0.95	-0.38
	31	32	LEU	266	8.69	1.78	10.7	1.37	19.39	2.29	-0.85	0.93	-0.73	0.85	-1.58	1.41	-25.55	0.43	-7.23	0.98	-32.78	0.98	-17.71	2.13	2.74	1.53	-14.97	2.69	1.6	0.32	-2.01	0.5	-0.41	0.45	0.59	0.09	0.03	0.01	0.61	0.08	2.19	0.32	-1.98	0.49	0.2	0.45	-15.52	2.09	0.76
	32	33	THR	267	6.54	1.45	10.48	1.06	17.03	1.87	-1.7	0.57	-1.4	0.78	-3.09	1.05	-22.79	1.48	-9	0.72	-31.79	1.64	-17.94	2.27	0.09	1.34	-17.85	2.75	-0.87	1.07	-4.43	0.56	-5.3	1.12	0.39	0.07	0.04	0.02	0.44	0.07	-0.48	1.05	-4.39	0.56	-4.86	1.1	-18.42	1.67	-4.3
	33	34	VAL	268	5.88	1.73	10.07	1	15.95	2.17	-4.07	0.8	-1.91	0.91	-5.98	1.41	-18.99	0.49	-9.25	1.13	-28.24	1.24	-17.18	1.83	-1.09	1.54	-18.27	2.33	3.61	0.36	-5.16	0.77	-1.56	0.68	0	0	0	0	0	0	3.61	0.36	-5.16	0.77	-1.56	0.67	-13.58	1.74	-6.25
	34	35	ALA	269	2.62	0.8	10.27	1.08	12.89	1.5	-2.32	0.33	-2.57	0.97	-4.88	0.95	2.07	0.13	-9.82	1.41	-7.75	1.47	2.37	0.87	-2.11	1.6	0.25	2	0.01	0.05	0.36	0.34	0.37	0.36	0	0	0	0	0	0	0.01	0.05	0.36	0.34	0.37	0.36	2.38	0.87	-1.75
	35	36	VAL	270	5.98	1.55	10.84	1.22	16.83	2.02	-3.82	0.72	-1.31	0.97	-5.13	1.2	-18.98	0.43	-4.45	0.87	-23.43	0.89	-16.81	1.72	5.08	1.39	-11.74	2.16	3.42	0.28	-4.61	0.41	-1.19	0.37	0	0	0	0	0	0	3.42	0.28	-4.61	0.41	-1.19	0.37	-13.39	1.68	0.47
	36	37	LYS	271	10.51	2.54	10.32	1.1	20.82	3.01	-5.45	0.71	-3.13	0.73	-8.58	1.06	-41.05	6.9	-9.89	0.96	-50.94	6.99	-35.99	7.04	-2.71	1.3	-38.7	7.16	17.29	6.03	-0.74	0.35	16.55	6.05	0.11	0.05	0	0	0.11	0.05	17.39	6.04	-0.74	0.35	16.66	6.06	-18.6	2.61	-3.44
	37	38	THR	272	6.15	1.47	10.36	1.4	16.51	2.14	-2.77	0.62	-2.28	0.71	-5.05	0.97	-23.92	0.84	-14.27	1.08	-38.19	1.3	-20.54	1.83	-6.19	1.73	-26.73	2.54	1.21	0.54	-2.7	0.74	-1.49	0.83	0.12	0.03	0	0	0.13	0.03	1.33	0.53	-2.7	0.74	-1.37	0.83	-19.21	1.72	-8.88
	38	39	LEU	273	9.26	1.95	10.79	1.36	20.05	2.44	-3.74	0.9	-1.85	0.71	-5.59	1.17	-25.71	0.37	8.01	0.91	-17.69	0.97	-20.19	2.14	16.95	1.61	-3.24	2.65	2.25	0.21	-8.58	0.9	-6.33	0.88	0.04	0.02	0.03	0.01	0.07	0.03	2.29	0.21	-8.55	0.89	-6.26	0.87	-17.89	2.14	8.4
	39	40	LYS	274	10.97	2.18	17.29	1.55	28.26	2.64	-1.95	0.85	-0.7	0.58	-2.64	1.11	-35.05	5.21	-6.38	0.97	-41.42	5.31	-26.03	5.7	10.22	1.35	-15.81	5.79	7.76	4.66	-7.6	0.6	0.16	4.65	0.41	0.09	0.28	0.03	0.69	0.11	8.17	4.65	-7.32	0.63	0.85	4.63	-17.86	2.53	2.89
	40	41	ASP	276	4.19	1.5	14.11	1.43	18.3	2.26	-1.44	0.47	-0.52	0.77	-1.96	1.08	13.78	2.03	-3.69	1.1	10.09	2.73	16.53	2.5	9.9	1.77	26.43	3.59	-78.5	2.21	-13.12	0.87	-91.62	2.79	0.57	0.05	0.19	0.02	0.75	0.04	-77.93	2.19	-12.94	0.87	-90.87	2.78	-61.4	1.3	-3.04
	41	42	THR	277	5.64	1.38	9.97	1.13	15.62	1.93	-0.63	0.8	0.21	0.79	-0.42	1.24	-23.14	2.62	-4.9	1.36	-28.04	3.04	-18.13	2.83	5.29	1.8	-12.84	3.36	-0.82	1.25	-7.62	1.06	-8.44	1.84	0.38	0.04	0.11	0.03	0.49	0.05	-0.44	1.22	-7.52	1.05	-7.95	1.81	-18.57	1.97	-2.23
	42	43	MET	278	7.43	1.89	10.61	1.5	18.03	2.6	-0.43	0.49	0.24	0.73	-0.19	0.95	-0.14	1.01	-3.89	1.15	-4.03	1.69	6.86	2.18	6.95	1.41	13.81	2.82	-0.96	0.91	-7.74	0.98	-8.7	1.5	1.21	0.07	0.09	0.03	1.3	0.08	0.25	0.9	-7.65	0.97	-7.4	1.49	7.11	2.01	-0.7
	43	44	GLU	279	7.12	2.12	10.58	1.53	17.71	2.64	-1.38	1.37	0.08	0.88	-1.3	1.75	-34.9	7.08	-5.78	1.56	-40.68	6.99	-29.16	6.79	4.88	1.72	-24.27	6.81	-28.49	6.03	-5.6	0.82	-34.09	6.02	0.16	0.07	0.03	0.02	0.19	0.07	-28.33	6.01	-5.57	0.81	-33.9	6.01	-57.48	2.36	-0.69
	44	45	VAL	280	6.54	1.63	10.82	1.38	17.36	2.28	-1.33	0.69	-0.2	0.95	-1.54	1.42	-18.46	0.48	-11.85	0.99	-30.31	0.95	-13.25	1.71	-1.24	1.63	-14.49	2.5	3.93	0.39	-5.11	1.01	-1.18	0.84	0.35	0.05	0.04	0.02	0.39	0.06	4.27	0.38	-5.06	1	-0.79	0.84	-8.98	1.67	-6.3
	45	46	GLU	281	6.34	1.98	10.03	1.09	16.37	2.46	-0.79	0.68	-0.01	0.8	-0.81	1.2	15	3.99	-10.68	2.68	4.32	5.64	20.55	4.6	-0.66	2.82	19.89	6.33	-78.43	4.12	-4.35	2.19	-82.77	5.5	0.86	0.08	0.11	0.05	0.97	0.1	-77.57	4.09	-4.23	2.16	-81.8	5.44	-57.02	1.98	-4.89
	46	47	GLU	282	6.1	1.98	10.76	1.33	16.86	2.63	-1.25	1.02	-0.56	1	-1.81	1.46	-13.47	9.29	-6.24	1.71	-19.71	9.42	-8.62	9.22	3.96	1.84	-4.66	9.52	-50.89	8.35	-4.9	0.94	-55.79	8.51	0.43	0.06	0	0.01	0.43	0.06	-50.46	8.32	-4.9	0.94	-55.36	8.49	-59.07	2.09	-0.94
	47	48	PHE	283	7.88	2	12.21	1.24	20.1	2.32	-5.2	0.67	-2.62	0.83	-7.82	1.17	1.11	0.42	-5.09	1.07	-3.98	1.3	3.79	2.28	4.51	1.4	8.3	2.79	-0.56	0.3	-2.43	0.66	-2.99	0.85	0.03	0.03	0.01	0.01	0.04	0.03	-0.54	0.29	-2.42	0.66	-2.96	0.83	3.26	2.24	2.09
	48	49	LEU	284	8.84	1.8	10.99	1.31	19.82	2.39	-2.17	0.87	-1.27	0.78	-3.44	1.27	-24.37	0.43	0.57	1.12	-23.8	1.12	-17.7	2.1	10.28	1.73	-7.42	2.92	1.08	0.3	-2.29	0.9	-1.21	0.81	0.33	0.06	0.03	0.01	0.36	0.06	1.41	0.3	-2.26	0.89	-0.85	0.81	-16.29	2.04	8.02
	49	50	LYS	285	11.28	2.49	11.28	1.55	22.56	3.07	-1.42	0.68	-1.68	0.63	-3.1	0.95	-10.95	8.66	-11.02	1.12	-21.97	8.2	-1.09	9.16	-1.42	1.76	-2.51	8.81	-16.05	8.65	-1.58	1.03	-17.63	8.09	0.97	0.09	0.05	0.02	1.01	0.09	-15.09	8.59	-1.53	1.02	-16.62	8.03	-16.18	2.69	-2.96
	50	51	GLU	286	6.01	1.63	11.52	1.36	17.53	2.16	-3.73	0.83	-2.42	0.86	-6.15	1.24	3.01	7.2	-15	1.35	-11.99	7.4	5.29	7.17	-5.89	2.11	-0.61	7.9	-60.57	6.99	-2.85	0.7	-63.43	7.19	0.13	0.05	0	0	0.13	0.05	-60.44	6.96	-2.85	0.7	-63.29	7.16	-55.15	1.73	-8.74
	51	52	ALA	287	2.85	0.86	11.05	1.52	13.91	1.93	-1.85	0.3	-2.69	0.68	-4.53	0.73	2.19	0.12	-7.87	1	-5.68	1	3.2	0.96	0.49	1.65	3.69	2.01	-0.24	0.05	-0.42	0.62	-0.65	0.65	0.01	0.01	0	0.01	0.01	0.01	-0.23	0.06	-0.42	0.62	-0.64	0.65	2.97	0.95	0.08
	52	53	ALA	288	2.91	0.84	10.9	1.38	13.81	1.86	-0.99	0.32	-1.67	0.74	-2.66	0.75	2.19	0.15	-2.83	1.41	-0.64	1.4	4.1	0.92	6.41	1.5	10.51	1.92	-0.22	0.12	-3.89	1.25	-4.11	1.26	0.27	0.04	0.05	0.02	0.32	0.05	0.05	0.14	-3.84	1.24	-3.79	1.25	4.15	0.89	2.57
	53	54	VAL	289	6.35	1.6	11.05	1.35	17.41	2.19	-2.01	0.91	-0.71	0.93	-2.72	1.44	-17.91	0.64	-8.19	1.55	-26.11	1.49	-13.57	1.94	2.15	1.64	-11.42	2.72	2.84	0.54	-4.74	1.04	-1.9	0.96	0.13	0.05	0.01	0.01	0.14	0.05	2.97	0.53	-4.74	1.04	-1.77	0.95	-10.6	1.9	-2.59
	54	55	MET	290	7.35	1.64	10.8	1.37	18.15	2.17	-5.91	0.69	-2.36	0.65	-8.26	1.04	-1.7	0.47	-0.2	1.16	-1.9	1.26	-0.25	1.85	8.24	1.56	7.99	2.46	1.72	0.37	-4.57	0.77	-2.84	0.76	0.03	0.02	0.01	0.01	0.04	0.02	1.75	0.37	-4.56	0.77	-2.81	0.76	1.5	1.81	3.68
	55	56	LYS	291	10.99	2.4	10.81	1.47	21.8	3.05	-3.28	0.77	-1.08	0.74	-4.36	1.16	4.91	4.98	-11.42	1.89	-6.52	4.51	12.61	5.18	-1.69	2.45	10.92	5.24	-29.9	4.85	-1	1.65	-30.9	4.44	0.55	0.09	0.07	0.04	0.63	0.09	-29.34	4.84	-0.93	1.63	-30.28	4.44	-16.73	2.37	-2.62
	56	57	GLU	292	5.92	1.76	10.62	1.61	16.54	2.6	-1.8	0.53	-0.06	0.9	-1.86	1.03	4.77	5.32	-12.22	2.79	-7.45	7.19	8.89	5.33	-1.65	2.7	7.23	7.04	-66.9	5.3	-3.72	2.12	-70.62	6.82	0.66	0.06	0.15	0.06	0.81	0.1	-66.23	5.27	-3.57	2.09	-69.81	6.75	-57.35	1.53	-5.23
	57	58	ILE	293	9.72	2.03	10.55	1.59	20.27	2.86	-3	1.08	-0.35	0.87	-3.35	1.64	-4.79	0.44	3.59	1.23	-1.2	1.36	1.94	2.06	13.79	1.52	15.72	2.72	2.54	0.41	-7.11	0.71	-4.56	0.69	0.02	0.01	0.02	0.02	0.04	0.03	2.56	0.41	-7.09	0.7	-4.53	0.68	4.5	2.07	6.7
	58	59	LYS	294	10.8	2.45	10.62	1.46	21.42	3	-0.65	0.91	-0.87	0.66	-1.52	1.28	0.54	6.76	-3.99	1.3	-3.45	6.48	10.7	7.58	5.76	1.67	16.45	7.49	-26.95	6.74	-1.9	0.97	-28.85	6.34	1.03	0.13	0.08	0.03	1.11	0.12	-25.92	6.69	-1.82	0.96	-27.74	6.31	-15.22	2.62	3.94
	59	60	HIS	295	24.79	1.7	11.08	1.2	35.87	2.27	-6.73	0.8	-0.29	0.79	-7.02	1.11	-12.85	1.2	-0.98	0.98	-13.84	1.68	5.21	2.08	9.81	1.58	15.01	2.79	-1.94	1.08	-3.93	0.68	-5.88	1.43	0.22	0.04	0.05	0.02	0.27	0.04	-1.73	1.07	-3.88	0.67	-5.61	1.41	3.48	1.84	5.92
	60	61	PRO	296	12.28	1.51	14.2	1.59	26.48	2.45	-1.08	0.5	-1.4	0.6	-2.48	0.72	-5.85	0.86	-2.89	1.43	-8.74	1.16	5.35	1.81	9.91	1.98	15.27	2.52	5.21	0.82	-7.81	1.17	-2.59	0.9	0.68	0.03	0.09	0.02	0.77	0.04	5.89	0.82	-7.72	1.16	-1.82	0.88	11.25	1.58	2.19
	61	62	ASN	297	11.24	1.49	10.24	1.33	21.48	2.04	-4.27	0.65	-0.94	0.99	-5.21	1.26	-81.63	1.26	-7.99	0.89	-89.63	1.44	-74.66	1.78	1.3	1.4	-73.36	2.18	-3.78	0.9	-0.82	0.33	-4.6	0.89	0.13	0.02	0	0	0.13	0.02	-3.65	0.89	-0.82	0.33	-4.47	0.88	-78.31	1.5	0.48
	62	63	LEU	298	8.96	1.89	10.34	1.34	19.3	2.48	-3.34	0.94	-2.13	0.95	-5.47	1.38	-26.55	0.44	-2.14	1.26	-28.7	1.25	-20.93	2.04	6.06	1.88	-14.87	2.88	2.66	0.32	-4.19	0.83	-1.53	0.72	0.07	0.03	0	0	0.07	0.03	2.73	0.31	-4.19	0.83	-1.46	0.72	-18.2	2.02	1.88
	63	64	VAL	299	6.61	1.64	10.31	1.25	16.92	2.19	-3.35	0.81	-1.63	0.67	-4.98	1.17	-19.69	0.54	-8.94	0.97	-28.63	1.13	-16.43	1.8	-0.26	1.56	-16.69	2.35	4.87	0.37	-6.13	0.67	-1.26	0.6	0.01	0.01	0.01	0.01	0.02	0.02	4.88	0.37	-6.12	0.67	-1.24	0.6	-11.54	1.78	-6.39
	64	65	GLN	300	13.89	1.88	10.97	1.22	24.86	2.34	-2.41	0.77	-2.38	0.72	-4.8	1.12	-70.89	5.85	-5.68	1.07	-76.56	5.9	-59.41	5.7	2.91	1.27	-56.5	6.18	-3.48	4.8	-3.76	0.49	-7.24	5.02	0.48	0.12	0.01	0.01	0.49	0.13	-3.01	4.72	-3.75	0.49	-6.75	4.94	-62.42	2	-0.84
	65	66	LEU	301	9.33	2.21	10.81	1.34	20.15	2.75	-3.95	0.99	-1.95	0.67	-5.9	1.16	-25.3	0.45	0.28	1.02	-25.02	1.01	-19.92	2.5	9.14	1.64	-10.78	3.12	1.41	0.37	-4.53	0.92	-3.13	0.86	0.01	0.01	0.07	0.03	0.07	0.03	1.41	0.37	-4.47	0.91	-3.05	0.86	-18.51	2.51	4.68
	66	67	LEU	302	8.81	2.04	10.56	1.3	19.36	2.31	-2.93	0.87	-1	0.72	-3.93	1.14	-25.21	0.46	-6.21	1.04	-31.43	0.93	-19.34	2.2	3.35	1.63	-15.99	2.34	1.74	0.33	-3.13	0.8	-1.38	0.73	0.19	0.06	0.11	0.03	0.31	0.06	1.93	0.31	-3.01	0.79	-1.08	0.72	-17.4	2.12	0.33
	67	68	GLY	303	0	0	8.27	1.5	8.27	1.5	0	0	-3.41	0.71	-3.41	0.71	0	0	-8.71	0.95	-8.71	0.95	0	0	-3.86	1.52	-3.86	1.52	0	0	-2.79	0.43	-2.79	0.43	0	0	0	0	0	0	0	0	-2.79	0.43	-2.79	0.43	0	0	-6.65
	68	69	VAL	304	6.08	1.78	9.87	1.39	15.95	2.18	-2.75	0.81	-1.77	0.93	-4.52	1.32	-16.87	0.52	-13.94	0.95	-30.8	0.89	-13.54	1.96	-5.84	1.48	-19.37	2.24	1.43	0.42	-1.62	0.58	-0.19	0.42	0.05	0.03	0	0	0.05	0.03	1.48	0.44	-1.62	0.58	-0.14	0.42	-12.06	1.9	-7.46
	69	70	CYS	305	3.29	0.89	10.68	1.3	13.97	1.72	-3.71	0.49	-2.6	0.74	-6.3	0.91	5.47	0.63	-7.71	1.12	-2.24	1.23	5.06	1.1	0.37	1.59	5.43	2.01	-0.83	0.26	-1	0.51	-1.84	0.59	0.01	0	0	0	0.01	0	-0.83	0.26	-1	0.51	-1.83	0.59	4.23	1.05	-0.63
	70	71	THR	306	6.07	1.26	11.18	1.27	17.25	2.03	-0.93	0.9	-0.42	0.61	-1.36	1.17	-27.93	3.21	-0.85	1.01	-28.78	3.68	-22.79	3.22	9.9	1.47	-12.89	3.95	1.11	1.59	-6.87	0.57	-5.76	1.77	0.15	0.05	0.11	0.02	0.26	0.05	1.26	1.57	-6.76	0.56	-5.5	1.75	-21.53	2.03	3.15
	71	72	ARG	307	12.84	2.75	11.01	1.62	23.85	3.06	-0.7	1.27	-0.11	0.7	-0.81	1.58	-204.74	5.34	-5.18	0.99	-209.91	5.61	-192.59	5.86	5.73	1.71	-186.87	6.24	12.49	4.35	-6.13	0.66	6.36	4.54	1.03	0.05	0.22	0.02	1.25	0.05	13.52	4.33	-5.9	0.66	7.61	4.52	-179.08	2.85	-0.18
	72	73	GLU	308	6.22	1.83	11.31	1.2	17.53	2.31	-1.95	1.12	-0.05	0.67	-2	1.32	-24.59	6.5	0.11	1.06	-24.48	6.37	-20.32	6.39	11.37	1.67	-8.95	6.37	-37.95	5.72	-6.77	0.9	-44.72	5.54	0.32	0.07	0.02	0.01	0.34	0.07	-37.63	5.68	-6.75	0.9	-44.38	5.51	-57.95	1.9	4.61
	73	74	PRO	309	12.01	1.29	14.44	1.17	26.45	1.83	-1.14	0.65	0.24	0.64	-0.9	0.94	-5.65	0.79	7.46	2.21	1.82	1.67	5.22	1.79	22.14	2.51	27.36	2.52	5.11	0.77	-8.47	2.01	-3.36	1.45	0.64	0.09	0.1	0.04	0.74	0.09	5.76	0.72	-8.37	1.98	-2.61	1.45	10.98	1.55	13.77
	74	75	PRO	310	12.07	1.21	12.97	1.05	25.04	1.82	-2.04	0.51	-1.97	0.6	-4.01	0.79	-6.87	1.15	2.54	1.77	-4.34	0.89	3.15	1.65	13.54	2.1	16.7	2.23	6.02	1.08	-9.03	1.61	-3.02	0.76	0.41	0.06	0.01	0.01	0.41	0.06	6.42	1.1	-9.03	1.61	-2.6	0.74	9.58	1.32	4.52
	75	76	PHE	311	8.11	2.04	9.48	1.33	17.58	2.64	-2.96	0.81	-2.9	0.7	-5.86	1.26	0.71	0.34	-5.48	0.89	-4.76	0.97	5.86	2.21	1.1	1.48	6.96	2.76	-0.78	0.33	-3.27	0.49	-4.05	0.59	0.28	0.06	0	0	0.28	0.06	-0.5	0.32	-3.27	0.49	-3.77	0.59	5.36	2.21	-2.17
	76	77	TYR	312	8.62	2.16	9.51	1.33	18.13	2.72	-4.16	0.61	-3.36	0.68	-7.52	0.9	-14.9	0.77	-7.71	0.78	-22.62	1.1	-10.44	2.2	-1.56	1.42	-12	2.65	-5.3	0.61	-0.38	0.32	-5.69	0.63	0.23	0.04	0	0	0.23	0.04	-5.08	0.61	-0.38	0.32	-5.46	0.63	-15.51	2.23	-1.95
	77	78	ILE	313	9.36	1.82	10.71	1.23	20.07	2.31	-3.39	1.14	-2.08	1	-5.48	1.6	-4.11	0.41	-6.08	0.86	-10.19	0.86	1.85	2.2	2.55	1.59	4.4	2.6	2.19	0.33	-4.07	0.39	-1.88	0.35	0	0	0	0	0	0	2.19	0.33	-4.07	0.39	-1.88	0.35	4.04	2.11	-1.51
	78	79	ILE	314	10.49	1.78	10.88	1.26	21.36	2.07	-4.79	1.03	-1.68	0.94	-6.47	1.43	-3.89	0.33	-12.32	1.1	-16.21	1.12	1.81	1.95	-3.13	1.39	-1.32	2.36	2.05	0.3	-1.51	0.48	0.54	0.37	0	0	0	0	0	0	2.05	0.3	-1.51	0.48	0.54	0.37	3.86	1.92	-4.64
	79	80	THR	315	6.34	1.26	10.14	1.13	16.47	1.83	-3.99	0.77	-2.11	0.81	-6.1	1.16	-24.85	1.12	-16.41	1.15	-41.26	1.51	-22.5	1.51	-8.39	1.44	-30.89	1.93	1.27	0.59	-1.57	0.43	-0.3	0.58	0	0	0	0	0	0	1.27	0.59	-1.57	0.43	-0.3	0.58	-21.24	1.4	-9.96
	80	81	GLU	316	6.46	1.8	9.66	1.4	16.11	2.24	-2.55	1.11	-1.99	0.84	-4.54	1.38	-17.91	6.09	0.23	1.17	-17.67	6.35	-14	6.5	7.9	1.87	-6.1	6.91	-45.47	5.29	-7.73	0.85	-53.2	5.6	0.16	0.03	0	0	0.16	0.04	-45.31	5.28	-7.73	0.85	-53.04	5.59	-59.31	2.3	0.17
	81	82	PHE	317	7.95	2.02	9.86	1.41	17.81	2.4	-2.61	0.66	-2	0.69	-4.61	0.97	0.73	0.49	-3.01	0.95	-2.28	1.02	6.07	2.25	4.84	1.51	10.91	2.47	-0.91	0.41	-4.65	0.72	-5.56	0.85	0.3	0.07	0.12	0.02	0.43	0.07	-0.61	0.39	-4.52	0.71	-5.13	0.84	5.46	2.2	0.32
	82	83	MET	318	7.25	2.03	11.08	1.46	18.32	2.66	-6.34	0.74	-2.26	0.65	-8.6	1.08	-2.9	0.57	-2.15	0.8	-5.05	0.99	-1.99	2.26	6.66	1.69	4.67	3.17	2.75	0.5	-6.18	0.65	-3.43	0.83	0.03	0.02	0.03	0.01	0.06	0.02	2.78	0.5	-6.15	0.65	-3.37	0.82	0.79	2.15	0.51
	83	84	THR	319	6.57	1.45	12.41	1.68	18.98	2.44	-1.19	0.66	-0.53	0.63	-1.71	1.09	-25.8	2.28	-7.03	1	-32.83	2.85	-20.43	2.81	4.86	1.74	-15.57	3.71	1.53	1.31	-9.01	0.72	-7.49	1.8	0.4	0.07	0.18	0.03	0.58	0.08	1.93	1.27	-8.83	0.71	-6.91	1.75	-18.5	1.92	-3.98
	84	85	TYR	320	8.75	1.95	8.96	1.22	17.71	2.29	-0.67	0.83	-0.74	0.76	-1.42	1.19	-18.13	0.73	-1.89	1	-20.02	1.07	-10.05	2.25	6.32	1.4	-3.73	2.45	-4.04	0.64	-7.69	0.81	-11.73	0.76	0.75	0.09	0.14	0.03	0.88	0.08	-3.29	0.62	-7.55	0.8	-10.84	0.75	-13.35	2.16	-1.23
	85	86	GLY	321	0	0	8.15	1.28	8.15	1.28	0	0	-2.22	0.77	-2.22	0.77	0	0	-9.34	1.14	-9.34	1.14	0	0	-3.4	1.43	-3.4	1.43	0	0	-2.32	0.74	-2.32	0.74	0	0	0.11	0.03	0.11	0.03	0	0	-2.21	0.74	-2.21	0.74	0	0	-5.61
	86	87	ASN	322	11.55	1.42	9.98	1.22	21.54	2.02	-4.48	0.89	-2.62	0.64	-7.1	1.21	-81.96	1.29	-1.81	1.29	-83.77	1.86	-74.88	1.82	5.55	1.67	-69.33	2.69	-3.38	0.95	-4.79	0.95	-8.17	1.45	0.02	0.01	0	0	0.02	0.01	-3.36	0.95	-4.79	0.95	-8.15	1.44	-78.24	1.56	0.77
	87	88	LEU	323	8.77	1.77	11.96	1.42	20.73	2.25	-4.45	0.86	-2.53	0.93	-6.98	1.19	-28.15	0.37	-0.5	0.94	-28.65	1.01	-23.84	1.95	8.94	1.79	-14.9	2.56	4.39	0.24	-7.42	0.56	-3.02	0.55	0	0	0	0	0	0	4.39	0.24	-7.42	0.56	-3.02	0.55	-19.44	1.96	1.52
	88	89	LEU	324	8.35	1.75	11.57	1.27	19.92	2.2	-2.85	0.99	-2.79	0.72	-5.64	1.37	-27.97	0.44	-4.89	0.96	-32.86	1.07	-22.47	2.11	3.88	1.45	-18.59	2.43	4.02	0.33	-6.92	0.67	-2.89	0.67	0.17	0.04	0	0	0.17	0.04	4.19	0.33	-6.92	0.67	-2.73	0.67	-18.28	2.1	-3.04
	89	90	ASP	325	4.35	1.25	10.5	1.27	14.85	1.81	-2.41	0.49	-2.21	0.74	-4.62	0.95	45.14	7	2.75	1.73	47.89	7.57	47.08	7.18	11.05	1.92	58.12	7.86	-108.82	6.79	-17.87	1.62	-126.69	7.18	0.41	0.06	0.02	0.02	0.43	0.07	-108.41	6.79	-17.85	1.61	-126.26	7.19	-61.33	1.35	-6.8
	90	91	TYR	326	8.1	1.88	11.33	1.33	19.44	2.4	-4.17	0.67	-1.9	0.81	-6.07	1.07	-20.23	1.52	-4.69	1.54	-24.92	1.98	-16.3	2.45	4.74	1.74	-11.56	3.11	-0.74	1.01	-5.14	0.69	-5.88	1.1	0.16	0.05	0.03	0.02	0.19	0.06	-0.58	1	-5.11	0.68	-5.69	1.08	-16.88	2.08	-0.37
	91	92	LEU	327	9.1	2.04	11.6	1.47	20.71	2.62	-4.9	0.8	-2.12	0.82	-7.02	1.24	-28.35	0.43	4.95	1.44	-23.4	1.42	-24.15	2.22	14.43	1.88	-9.72	2.58	4.99	0.28	-7.17	1.04	-2.18	0.96	0	0	0.01	0.01	0.01	0.01	4.99	0.28	-7.16	1.03	-2.17	0.96	-19.17	2.16	7.27
	92	93	ARG	328	12.9	2.8	10.8	1.33	23.71	3.33	-3.79	0.92	-0.57	0.66	-4.35	1.26	-228.84	5.62	-9.61	1.26	-238.45	5.46	-219.72	6	0.63	1.68	-219.09	6.21	43.4	5.2	-5.04	1.07	38.35	5.09	0.78	0.05	0.23	0.04	1.01	0.07	44.18	5.18	-4.81	1.07	39.37	5.06	-175.54	2.73	-4.18
	93	94	GLU	329	6.32	1.85	10.74	1.58	17.06	2.53	-0.6	0.71	0.43	0.73	-0.17	1.27	60.27	4.6	-4.78	1.44	55.49	4.37	65.98	4.63	6.4	1.65	72.38	4.64	-123.13	4.07	-13.52	0.98	-136.65	3.99	0.9	0.08	0.2	0.04	1.1	0.06	-122.24	4.12	-13.31	1	-135.55	4.01	-56.26	1.69	-6.91
	94	95	CYS	330	3.44	0.92	10.19	1.38	13.63	1.77	-3.3	0.52	-0.52	0.75	-3.82	0.9	6.07	1.15	-6.42	1.39	-0.35	1.9	6.21	1.57	3.25	1.71	9.46	2.59	-1.42	0.69	-1.85	1.26	-3.27	1.54	0.01	0.01	0.13	0.03	0.14	0.04	-1.41	0.69	-1.72	1.24	-3.13	1.52	4.8	1.21	1.53
	95	96	ASN	331	11.35	1.87	10.64	1.28	21.99	2.45	-1.52	0.61	-0.92	0.89	-2.44	1.23	-82.09	2.79	1.6	2.27	-80.49	4.39	-72.26	3.11	11.33	2.15	-60.94	4.55	-5.41	2.35	-4.35	0.97	-9.76	3.09	0.58	0.06	0.1	0.02	0.67	0.06	-4.83	2.31	-4.25	0.98	-9.09	3.06	-77.1	1.74	7.08
	96	97	ARG	332	12.91	2.56	11.39	1.41	24.29	3.09	-3.15	0.83	-0.78	0.66	-3.93	1.15	-221.28	4.67	-2.21	1.08	-223.49	4.76	-211.52	5.3	8.4	1.64	-203.12	5.41	36.5	4.43	-7.25	0.82	29.25	4.44	0.97	0.06	0.15	0.04	1.12	0.07	37.47	4.4	-7.1	0.82	30.37	4.41	-174.05	2.27	1.3
	97	98	GLN	333	13.88	2.55	11.14	1.72	25.03	2.98	-0.19	0.6	0.53	0.91	0.33	1.25	-64.13	2.14	-11.52	1.52	-75.65	2.89	-50.44	2.67	0.15	2.12	-50.29	3.43	-10.74	1.65	-5.69	1.36	-16.43	2.5	1.05	0.05	0.18	0.08	1.24	0.08	-9.69	1.64	-5.5	1.31	-15.2	2.45	-60.13	2.13	-5.36
	98	99	GLU	334	6.1	1.83	11.13	1.37	17.23	2.31	-1.54	0.76	-0.6	0.78	-2.14	1.18	39.71	4.12	1.07	1.55	40.78	4.45	44.27	4.4	11.6	1.67	55.87	4.9	-101.78	4.43	-11.08	1.07	-112.86	4.75	0.66	0.1	0.11	0.03	0.77	0.11	-101.12	4.37	-10.97	1.07	-112.09	4.7	-56.86	1.86	0.63
	99	100	VAL	335	5.82	1.49	10.74	1.46	16.56	2.3	-2.9	0.83	-1.05	0.92	-3.95	1.3	-22.39	0.5	-1.99	1.39	-24.38	1.6	-19.47	1.83	7.7	1.67	-11.77	2.52	7.13	0.4	-10.31	0.89	-3.18	0.95	0	0.01	0.01	0.01	0.01	0.01	7.14	0.4	-10.3	0.89	-3.17	0.95	-12.33	1.76	-2.6
	100	101	ASN	336	11.5	1.85	10.23	1.31	21.73	2.29	-1.91	0.6	-0.49	0.97	-2.4	1.24	-81.4	2.53	-8.03	1.12	-89.43	2.88	-71.8	2.84	1.71	1.66	-70.09	3.79	-5.31	2.13	-3.14	0.49	-8.44	2.33	0.49	0.07	0.03	0.01	0.52	0.08	-4.81	2.09	-3.11	0.49	-7.92	2.29	-76.62	1.62	-1.4
	101	102	ALA	337	2.76	0.78	11.1	1.55	13.85	1.86	-0.75	0.24	-1.56	0.63	-2.31	0.74	2.19	0.13	-3.62	0.94	-1.43	0.98	4.19	0.83	5.92	1.62	10.11	2.04	-0.21	0.07	-3.42	0.67	-3.63	0.69	0.28	0.09	0.08	0.02	0.36	0.1	0.07	0.08	-3.34	0.66	-3.27	0.65	4.26	0.83	2.58
	102	103	VAL	338	6.58	1.81	10.87	1.2	17.44	2.37	0.22	0.72	-0.32	0.84	-0.1	1.13	-21.46	0.46	-4.4	1.15	-25.86	1.27	-14.66	1.9	6.15	1.51	-8.51	2.65	6.2	0.38	-8.42	0.64	-2.22	0.67	0.68	0.05	0.01	0.01	0.68	0.05	6.88	0.38	-8.41	0.64	-1.54	0.66	-7.78	1.89	-2.27
	103	104	VAL	339	6.08	1.47	11.3	1.38	17.38	2.06	-2.68	0.84	-0.59	0.88	-3.27	1.24	-21.88	0.59	-6.24	0.92	-28.11	1.06	-18.48	1.83	4.47	1.59	-14.01	2.42	6.94	0.42	-7.78	0.41	-0.84	0.42	0.15	0.04	0.01	0.01	0.16	0.04	7.09	0.42	-7.77	0.41	-0.68	0.41	-11.39	1.76	-3.29
	104	105	LEU	340	9.53	2.32	11.34	1.21	20.87	2.8	-3.29	1.05	-2.39	0.77	-5.68	1.36	-27.6	0.47	-2.86	0.83	-30.46	0.86	-21.36	2.41	6.09	1.27	-15.27	2.84	4.26	0.28	-5.51	0.41	-1.25	0.43	0.11	0.04	0.01	0.01	0.12	0.05	4.37	0.29	-5.5	0.41	-1.12	0.42	-16.98	2.41	0.59
	105	106	LEU	341	9.18	2.29	11.66	1.4	20.84	2.9	-2.66	0.95	-1.63	0.98	-4.29	1.16	-28.29	0.36	-8.84	0.96	-37.13	1.04	-21.78	2.71	1.2	1.64	-20.57	3.23	4.45	0.26	-4.92	0.4	-0.46	0.43	0.13	0.05	0.02	0.01	0.15	0.05	4.59	0.27	-4.9	0.4	-0.31	0.44	-17.19	2.68	-3.7
	106	107	TYR	342	8.87	2.11	11.24	1.35	20.11	2.57	-2.63	0.61	-3.03	0.86	-5.66	1.03	-19.81	0.51	-11.26	0.79	-31.07	0.93	-13.57	2.24	-3.05	1.47	-16.62	2.75	-2.14	0.41	-1.75	0.3	-3.89	0.55	0.51	0.05	0	0	0.51	0.05	-1.62	0.38	-1.75	0.3	-3.37	0.53	-15.19	2.21	-4.8
	107	108	MET	343	7.53	2.06	11.29	1.27	18.82	2.45	-6.44	0.63	-3.19	0.71	-9.63	0.99	-2.53	0.35	-8.16	0.89	-10.69	0.92	-1.44	2.15	-0.06	1.31	-1.5	2.6	2.72	0.27	-3.29	0.37	-0.58	0.44	0	0	0	0	0	0	2.72	0.27	-3.29	0.37	-0.58	0.44	1.27	2.13	-3.35
	108	109	ALA	344	2.77	0.8	11.29	1.37	14.06	1.71	-1.92	0.37	-3.15	0.94	-5.07	0.99	2.23	0.12	-11.28	1.48	-9.05	1.51	3.08	0.85	-3.14	1.84	-0.06	2.2	-0.28	0.04	0.04	0.39	-0.24	0.4	0.01	0.01	0	0	0.01	0.01	-0.27	0.04	0.04	0.39	-0.23	0.4	2.81	0.85	-3.1
	109	110	THR	345	6.58	1.6	11.36	1.33	17.94	2.14	-2.79	0.7	-1.74	0.97	-4.53	1.24	-24.75	0.8	-12.69	2.2	-37.44	2.44	-20.97	1.8	-3.06	2.02	-24.03	2.87	1.81	0.46	-3.6	0.66	-1.8	0.71	0.11	0.05	0	0	0.11	0.05	1.91	0.44	-3.6	0.66	-1.69	0.69	-19.05	1.76	-6.66
	110	111	GLN	346	13.43	1.94	11.21	1.2	24.64	2.25	-6.11	0.76	-3.18	0.71	-9.29	1.09	-74.46	1.57	-6.31	1.14	-80.77	1.92	-67.15	2.13	1.72	1.52	-65.42	2.66	1.18	0.66	-2.06	0.45	-0.89	0.79	0.05	0.02	0.01	0.01	0.05	0.02	1.22	0.66	-2.06	0.45	-0.83	0.78	-65.92	2.05	-0.33
	111	112	ILE	347	9.49	2.14	11.14	1.11	20.63	2.57	-3.07	1.05	-1.58	0.97	-4.66	1.54	-6.47	0.29	-6.22	0.93	-12.68	0.9	-0.05	2.23	3.34	1.49	3.29	2.58	4.91	0.23	-5.52	0.43	-0.61	0.36	0	0	0	0	0	0	4.91	0.23	-5.52	0.43	-0.61	0.36	4.86	2.19	-2.18
	112	113	SER	348	3.89	1.02	11.42	1.15	15.31	1.68	-2.95	0.58	-2.81	0.88	-5.76	1.14	-3.42	1.65	-8.83	1.23	-12.25	2.13	-2.49	1.87	-0.22	1.51	-2.71	2.43	1.47	1.05	-4.65	0.65	-3.19	1.17	0	0	0	0	0	0	1.47	1.05	-4.65	0.65	-3.19	1.17	-1.02	1.34	-4.87
	113	114	SER	349	3.61	0.91	11.28	1.18	14.9	1.64	-1.81	0.69	-3.17	0.62	-4.98	1	-4.84	1.94	-7.66	1.12	-12.5	1.91	-3.04	1.92	0.45	1.6	-2.59	2.39	0.79	1.38	-4.37	0.84	-3.58	1.41	0.12	0.03	0	0.01	0.13	0.03	0.91	1.37	-4.37	0.84	-3.46	1.4	-2.13	1.24	-3.91
	114	115	ALA	350	2.77	0.87	10.85	1.29	13.62	1.63	-2.01	0.44	-3.46	0.68	-5.48	0.78	2.3	0.14	-8.95	1.04	-6.65	1.06	3.06	1.02	-1.56	1.53	1.49	1.98	-0.25	0.05	0.73	0.41	0.47	0.43	0	0	0	0	0	0	-0.25	0.05	0.73	0.41	0.48	0.43	2.8	1.02	-0.83
	115	116	MET	351	7.1	1.72	10.73	1.27	17.84	2.13	-6.83	0.65	-2.94	0.69	-9.77	1.01	-3.45	0.32	-9.93	0.83	-13.38	0.85	-3.18	1.76	-2.13	1.42	-5.31	2.34	3.11	0.26	-2.78	0.51	0.33	0.54	0	0	0	0	0	0	3.11	0.26	-2.78	0.51	0.33	0.54	-0.07	1.77	-4.91
	116	117	GLU	352	8.03	1.98	11	1.49	19.03	2.67	-3.85	0.98	-2.79	0.88	-6.65	1.42	13.43	10.46	-5.43	1.44	8	11.19	17.61	10.63	2.78	2.06	20.38	11.48	-73.39	9.83	-6.81	1.04	-80.2	10.38	0.21	0.06	0	0	0.21	0.06	-73.18	9.79	-6.81	1.04	-79.99	10.34	-55.57	2.13	-4.03
	117	118	TYR	353	8.71	2.11	11.44	1.3	20.16	2.54	-4.03	0.84	-2.63	0.93	-6.66	1.28	-16.5	1.29	-7.88	1.03	-24.38	1.65	-11.82	2.56	0.94	1.61	-10.88	3.02	-4.73	0.86	-0.33	0.54	-5.06	0.98	0.24	0.07	0	0	0.24	0.07	-4.49	0.89	-0.33	0.54	-4.82	1	-16.31	2.52	0.61
	118	119	LEU	354	9.08	1.82	12.26	1.37	21.34	2.52	-3.77	0.75	-2.81	0.74	-6.59	1.02	-27.03	0.41	-9.42	0.98	-36.45	0.97	-21.72	2.01	0.03	1.4	-21.7	2.58	3.16	0.29	-2.49	0.56	0.67	0.5	0.02	0.01	0	0	0.02	0.01	3.18	0.3	-2.49	0.56	0.69	0.5	-18.55	1.95	-2.46
	119	120	GLU	355	5.79	1.58	11.2	1.25	16.99	2.16	-4.18	0.86	-1.9	0.68	-6.08	1.04	11.33	4.46	-1.7	1.07	9.63	4.97	12.94	4.86	7.61	1.28	20.54	5.35	-67.62	4.23	-6.58	0.88	-74.21	4.76	0.18	0.02	0.07	0.02	0.25	0.03	-67.44	4.22	-6.51	0.88	-73.96	4.75	-54.51	1.84	1.09
	120	121	LYS	356	11.64	2.54	11.53	1.66	23.18	2.94	-0.76	0.96	-0.8	0.67	-1.56	1.17	-49.21	13.71	0.09	1.48	-49.12	13.81	-38.33	13.42	10.82	1.81	-27.51	13.56	20.53	12.98	-3.19	1.05	17.34	12.9	0.84	0.1	0.24	0.02	1.08	0.09	21.38	12.92	-2.96	1.05	18.42	12.85	-16.95	2.77	7.87
	121	122	LYS	357	12.09	2.4	10.59	1.32	22.68	2.71	-2.7	0.91	-0.22	0.83	-2.92	1.38	-9.94	8.21	-8.89	1.07	-18.83	8.23	-0.55	8.35	1.48	1.4	0.93	8.4	-16.51	7.98	-3.62	0.65	-20.13	8.1	0.65	0.09	0.13	0.02	0.78	0.09	-15.86	7.91	-3.49	0.65	-19.35	8.04	-16.41	2.57	-2.02
	122	123	ASN	358	11.46	1.8	11.75	1.65	23.21	2.66	-0.07	0.63	-0.47	0.75	-0.54	1.14	-75.62	1.42	-14.13	1.74	-89.75	2.16	-64.23	1.98	-2.85	2.08	-67.08	2.84	-11.85	0.91	-2.05	1.11	-13.89	1.31	0.89	0.05	0.14	0.02	1.02	0.05	-10.96	0.91	-1.91	1.11	-12.87	1.31	-75.19	1.68	-4.76
	123	124	PHE	359	8.12	2.16	10.03	1.12	18.15	2.56	-1.49	0.62	-1.3	0.76	-2.79	0.97	1.71	0.69	-1.28	0.97	0.43	1.36	8.34	2.34	7.45	1.41	15.79	2.85	-1.24	0.55	-5.79	0.59	-7.03	0.91	0.33	0.06	0.03	0.01	0.36	0.06	-0.9	0.53	-5.77	0.59	-6.67	0.89	7.44	2.28	1.68
	124	125	ILE	360	9.18	2.09	10.08	1.29	19.25	2.39	-2.05	0.77	-0.18	0.93	-2.23	1.4	-4.98	0.46	-6.83	1.3	-11.81	1.22	2.14	1.95	3.06	1.89	5.21	2.62	2.73	0.39	-2.79	0.86	-0.07	0.77	0.3	0.05	0.01	0.01	0.32	0.05	3.03	0.39	-2.78	0.86	0.25	0.77	5.17	1.99	0.28
	125	126	HIS	361	24.79	1.64	11.41	1.14	36.19	2	-7.3	0.66	-1.43	1.03	-8.73	1.28	-13.85	1.33	-3.25	1.79	-17.1	2.6	3.64	1.88	6.73	1.84	10.36	2.86	-0.08	0.8	-3	1.06	-3.08	1.62	0.03	0.01	0.01	0.01	0.05	0.02	-0.05	0.8	-2.98	1.06	-3.03	1.61	3.59	1.74	3.74
	126	127	ARG	362	14.07	2.86	12.11	1.65	26.18	3.4	-3.39	0.96	-1.23	0.58	-4.62	1.14	-181.53	5.56	-13.41	1.42	-194.94	5.92	-170.85	6.05	-2.53	1.67	-173.38	6.43	-2.31	5.53	-0.92	1.15	-3.24	5.88	0.73	0.11	0.12	0.05	0.84	0.12	-1.59	5.47	-0.8	1.13	-2.39	5.81	-172.44	2.65	-3.33
	127	128	ASP	363	4.89	1.61	10.03	1.47	14.92	2.39	-1.05	1.34	-0.14	0.85	-1.19	1.69	-18.6	6.97	-10.74	1.26	-29.34	7.31	-14.76	6.66	-0.85	1.95	-15.61	7.32	-45.95	5.25	-7.63	0.69	-53.58	5.72	0.11	0.02	0.02	0.01	0.13	0.02	-45.83	5.25	-7.61	0.68	-53.44	5.72	-60.6	2.24	-8.46
	128	129	LEU	364	8.77	1.89	10.79	1.23	19.57	2.35	-4.36	0.83	-1.7	0.92	-6.06	1.27	-27.97	0.39	-0.09	0.82	-28.06	0.88	-23.55	2.05	9	1.52	-14.56	2.51	4.09	0.24	-6.5	0.69	-2.41	0.68	0	0	0.02	0.01	0.02	0.01	4.09	0.24	-6.49	0.69	-2.4	0.68	-19.47	2.01	2.51
	129	130	ALA	365	2.43	0.83	9.77	1.15	12.2	1.53	-1.5	0.65	-2.69	0.9	-4.19	1.03	2.52	0.14	-8.74	1.35	-6.22	1.36	3.45	1.15	-1.66	1.73	1.79	2.01	-0.48	0.09	0.09	0.44	-0.39	0.48	0	0	0	0	0	0	-0.48	0.09	0.09	0.44	-0.38	0.48	2.98	1.16	-1.57
	130	131	ALA	366	2.92	0.91	11.28	1.49	14.2	2.01	-2.22	0.33	-3.37	0.71	-5.59	0.75	2.05	0.15	-0.83	1.4	1.22	1.38	2.75	0.9	7.07	2	9.83	2.43	-0.07	0.06	-0.66	0.48	-0.73	0.47	0	0	0	0	0	0	-0.07	0.06	-0.66	0.48	-0.73	0.47	2.68	0.91	6.41
	131	132	ARG	367	13.8	2.86	10.88	1.39	24.68	3.21	-6.75	1.06	-2.11	0.71	-8.85	1.34	-219.16	5.12	-1.05	0.78	-220.21	5.09	-212.11	5.47	7.72	1.18	-204.39	5.53	37.13	4.09	-5.76	0.5	31.37	4.13	0.09	0.03	0.01	0.01	0.1	0.04	37.22	4.08	-5.75	0.5	31.47	4.12	-174.89	3.48	1.97
	132	133	ASN	368	12.65	2.06	10.41	1.33	23.06	2.41	-3.99	1.02	-1.76	0.86	-5.75	1.44	-83.72	1.85	-14.79	1.03	-98.5	1.99	-75.05	1.84	-6.13	1.52	-81.19	2.3	-2.96	1.01	0.18	0.35	-2.78	1.07	0	0	0	0	0	0	-2.96	1.01	0.18	0.35	-2.77	1.07	-78.01	1.51	-5.95
	133	134	CYS	369	3.04	0.97	9.53	1.18	12.57	1.63	-4.25	0.47	-2.28	0.8	-6.53	0.95	5.96	0.36	-7.47	0.83	-1.51	0.9	4.74	1.21	-0.22	1.34	4.52	2.05	-1.34	0.14	0.05	0.31	-1.29	0.3	0	0	0	0	0	0	-1.34	0.14	0.05	0.31	-1.29	0.3	3.4	1.17	-0.17
	134	135	LEU	370	8.46	1.65	9.96	1.21	18.42	2.29	-4.58	0.98	-2.1	0.91	-6.68	1.37	-27.35	0.38	-4.08	0.91	-31.42	0.98	-23.47	2.03	3.79	1.34	-19.68	2.46	4.1	0.25	-3.87	0.46	0.23	0.42	0	0	0	0	0	0	4.1	0.25	-3.87	0.46	0.23	0.43	-19.37	2	-0.09
	135	136	VAL	371	6.04	1.46	9.27	1.27	15.31	1.95	-3.62	0.82	-1.98	0.83	-5.6	1.22	-22.82	0.44	-8.28	1	-31.1	1.06	-20.4	1.78	-0.98	1.47	-21.39	2.24	7.23	0.32	-7.11	0.54	0.12	0.49	0	0	0	0	0	0	7.24	0.32	-7.11	0.54	0.12	0.49	-13.17	1.78	-8.1
	136	137	GLY	372	0	0	9.11	1.44	9.11	1.44	0	0	-3.35	0.84	-3.35	0.84	0	0	-9.91	1.62	-9.91	1.62	0	0	-4.14	2.25	-4.14	2.25	0	0	-3.95	1.09	-3.95	1.09	0	0	0.01	0.01	0.01	0.01	0	0	-3.94	1.09	-3.94	1.09	0	0	-8.08
	137	138	GLU	373	6.33	1.88	9.68	1.39	16.02	2.38	-0.45	0.53	-0.68	0.76	-1.13	1.01	33.98	3.77	2.84	1.28	36.82	4.14	39.87	3.99	11.85	1.73	51.71	4.5	-97.62	4.29	-11.75	1.01	-109.37	4.37	0.87	0.07	0.06	0.02	0.93	0.07	-96.75	4.26	-11.69	1.01	-108.44	4.33	-56.89	1.93	0.16
	138	139	ASN	374	11.17	1.76	10.83	1.46	22.01	2.39	-0.07	0.58	-0.1	0.76	-0.18	1.19	-74.84	1.69	-4.27	1.39	-79.11	2.36	-63.74	1.72	6.46	1.86	-57.28	2.71	-12.95	1.23	-4.66	1.18	-17.61	1.81	0.86	0.04	0.15	0.03	1.02	0.06	-12.09	1.21	-4.51	1.18	-16.59	1.79	-75.82	1.42	1.95
	139	140	HIS	375	24.96	1.67	11.1	1.34	36.06	2.18	-4.54	0.69	-1.65	0.71	-6.19	1.15	-11.7	2.35	-4.97	0.98	-16.67	2.6	8.71	2.84	4.49	1.34	13.2	3.22	-2.72	1.66	-5.09	0.59	-7.81	1.89	0.24	0.09	0.02	0.01	0.26	0.09	-2.48	1.62	-5.07	0.59	-7.55	1.85	6.22	1.9	-0.58
	140	141	LEU	376	9.31	1.86	10.33	1.22	19.64	2.45	-2.06	0.9	-1.34	0.91	-3.39	1.4	-27.94	0.34	-3.2	1.13	-31.15	1.1	-20.69	1.89	5.79	1.42	-14.9	2.6	4.13	0.25	-5.56	0.62	-1.43	0.61	0.41	0.05	0	0	0.41	0.05	4.54	0.24	-5.55	0.62	-1.02	0.61	-16.15	1.92	0.23
	141	142	VAL	377	6.21	1.58	10.06	1.19	16.28	2.01	-3.63	0.8	-1.72	0.9	-5.35	1.27	-21.91	0.42	-2.99	1.09	-24.9	1.14	-19.33	1.79	5.36	1.52	-13.97	2.32	6.57	0.31	-6.69	0.46	-0.12	0.38	0	0	0	0	0	0	6.57	0.31	-6.69	0.46	-0.12	0.38	-12.76	1.75	-1.33
	142	143	LYS	378	10.86	2.32	9.9	1.21	20.76	2.82	-5.15	1.11	-2.29	0.89	-7.44	1.34	-61.96	5.04	-7.34	0.77	-69.3	5.21	-56.25	5.38	0.27	1.24	-55.98	5.47	35.45	4.47	-2.34	0.29	33.11	4.4	0.14	0.04	0	0	0.14	0.04	35.59	4.47	-2.34	0.29	33.25	4.4	-20.67	2.86	-2.07
	143	144	VAL	379	5.83	1.45	9.61	1.19	15.44	1.97	-3.15	0.65	-1.49	0.73	-4.63	1	-20.64	0.38	-13.68	0.83	-34.32	0.9	-17.96	1.62	-5.55	1.68	-23.51	2.33	5.36	0.28	-5.5	0.44	-0.14	0.38	0.01	0.01	0	0	0.01	0.01	5.37	0.28	-5.5	0.44	-0.13	0.38	-12.59	1.55	-11.05
	144	145	ALA	380	2.27	0.79	9.74	1.33	12.02	1.71	-1.77	0.45	-1.7	0.8	-3.46	0.97	2.11	0.12	-8.25	1.07	-6.14	1.09	2.61	0.93	-0.2	1.66	2.41	2.11	-0.11	0.07	-1.87	0.48	-1.98	0.5	0	0	0.02	0.01	0.02	0.01	-0.11	0.07	-1.85	0.48	-1.95	0.5	2.5	0.92	-2.05
	145	146	ASP	381	4.4	1.56	9.74	1.23	14.14	1.86	-3.06	0.65	-1.85	0.69	-4.91	1.05	9.14	4.45	-4.71	2.09	4.43	4.95	10.48	4.9	3.18	1.96	13.66	5.21	-67.64	4.39	-6.18	0.86	-73.81	4.6	0.09	0.03	0.01	0.01	0.09	0.03	-67.55	4.39	-6.17	0.86	-73.72	4.6	-57.07	1.58	-2.99
	146	147	PHE	382	8.38	1.86	9.79	1.33	18.17	2.34	-4.04	0.79	-1.21	0.63	-5.25	1.07	-0.39	0.38	-6.98	1.76	-7.37	1.83	3.95	1.95	1.59	1.77	5.54	2.66	1.26	0.27	-0.69	1.27	0.57	1.28	0	0	0.03	0.02	0.03	0.02	1.26	0.27	-0.66	1.25	0.6	1.27	5.21	1.99	0.93
	147	148	GLY	383	0	0	9.68	1.53	9.68	1.53	0	0	-2.14	0.63	-2.14	0.63	0	0	-9.2	3.66	-9.2	3.66	0	0	-1.66	3.97	-1.66	3.97	0	0	0.39	2.23	0.39	2.23	0	0	0.17	0.06	0.17	0.06	0	0	0.56	2.21	0.56	2.21	0	0	-1.1
	148	149	LEU	384	8.87	1.87	11.28	1.36	20.15	2.48	-3.8	0.96	-1.42	0.79	-5.21	1.15	-26.43	0.48	-8.42	1.39	-34.85	1.43	-21.35	2.18	1.44	1.75	-19.91	3.08	2.97	0.4	-1.6	0.75	1.38	0.79	0.01	0.01	0	0	0.01	0.01	2.99	0.39	-1.6	0.75	1.39	0.79	-18.37	2.14	-0.16
	149	150	SER	385	3.69	0.96	10.75	1.36	14.45	1.66	-1.56	0.41	-1.37	0.82	-2.93	1.05	-2.94	1.51	-7.38	2.25	-10.32	2.59	-0.81	1.68	2	2.5	1.19	2.89	-1.02	1.48	0.2	1.65	-0.82	2.03	0.26	0.04	0	0	0.27	0.04	-0.75	1.46	0.2	1.65	-0.55	2.01	-1.56	1.28	2.2
	150	151	ARG	386	12.72	3.03	10	1.49	22.72	3.38	-0.88	1.47	0.34	0.65	-0.54	1.59	-207.18	7.62	-2.47	1.4	-209.65	7.74	-195.34	7.49	7.87	1.71	-187.47	7.88	15.08	5.77	-4.55	0.94	10.53	5.9	0.7	0.13	0.18	0.03	0.88	0.14	15.78	5.75	-4.36	0.93	11.41	5.87	-179.56	3.44	3.5
	151	152	LEU	387	8.57	1.85	11.39	1.25	19.96	2.44	-1.31	1.09	0.04	0.86	-1.27	1.58	-25.67	0.47	-5.57	1.3	-31.24	1.25	-18.42	2	5.85	1.5	-12.56	2.53	1.75	0.36	-6.68	0.88	-4.93	0.81	0.38	0.08	0.18	0.02	0.56	0.08	2.13	0.36	-6.5	0.87	-4.37	0.8	-16.28	1.99	-0.65
	152	153	MET	388	7.1	1.7	10.93	1.46	18.03	2.28	-4.3	0.76	-1.28	0.79	-5.58	1.25	-1.84	1.39	-11.96	1.53	-13.8	2.39	0.96	1.98	-2.32	2.05	-1.36	3.02	1.36	1.21	-3.62	0.66	-2.27	1.56	0.27	0.08	0.03	0.02	0.3	0.08	1.63	1.2	-3.6	0.67	-1.97	1.54	2.59	1.62	-5.91
	153	154	THR	389	6.49	1.43	9.53	1.39	16.02	2.33	-1.08	0.69	0.27	0.76	-0.81	1.07	-24.89	3.27	-5.44	1.54	-30.33	3.6	-19.47	3.05	4.36	1.82	-15.11	3.8	0.2	2.52	-8.87	1.11	-8.67	2.83	0.43	0.07	0.16	0.03	0.59	0.07	0.63	2.52	-8.71	1.11	-8.08	2.84	-18.84	1.53	-4.35
	154	155	GLY	390	0	0	9.95	1.87	9.95	1.87	0	0	-0.93	0.8	-0.93	0.8	0	0	-7.3	1.47	-7.3	1.47	0	0	1.73	2.02	1.73	2.02	0	0	-6.97	1.42	-6.97	1.42	0	0	0.43	0.08	0.43	0.08	0	0	-6.54	1.36	-6.54	1.36	0	0	-4.8
	155	156	ASP	391	4.02	1.14	11.43	1.32	15.45	1.8	-1.24	0.64	-0.22	0.74	-1.45	0.95	16.87	6.27	-0.65	1.6	16.21	7.07	19.65	6.3	10.56	1.97	30.21	7.28	-81.48	6.42	-12.46	1.36	-93.94	7.26	0.57	0.08	0.22	0.07	0.79	0.09	-80.9	6.38	-12.25	1.33	-93.15	7.2	-61.26	1.3	-1.69
	156	157	THR	392	6.28	1.4	11.19	1.19	17.47	2.11	-2.21	0.81	-1.11	0.8	-3.32	1.37	-24.55	2.95	-9.2	1.23	-33.75	3.32	-20.48	3.06	0.88	1.52	-19.6	3.57	0.4	1.75	-4.4	0.74	-3.99	1.99	0.15	0.08	0.04	0.02	0.19	0.09	0.55	1.75	-4.36	0.74	-3.8	1.97	-19.93	2	-3.48
	157	158	TYR	393	8.54	1.89	10.14	1.26	18.68	2.47	-5.03	1.14	-2.04	1.12	-7.07	1.7	-25.81	1.42	-8.63	1.74	-34.44	2.41	-22.3	2.34	-0.53	1.98	-22.83	3.11	0.57	0.69	-1.28	1.39	-0.71	1.75	0.02	0.01	0	0	0.03	0.01	0.6	0.7	-1.28	1.39	-0.68	1.76	-21.7	2.3	-1.8
	158	159	THR	394	6.93	1.37	10.66	1.28	17.59	1.9	-2.13	0.55	-1.23	0.85	-3.36	1.04	-21.61	1.4	-12.26	1.25	-33.87	1.84	-16.81	1.89	-2.83	1.59	-19.63	2.47	-1.21	1.06	-2.52	0.61	-3.73	1.08	0.2	0.07	0.01	0.01	0.21	0.07	-1.01	1.05	-2.51	0.61	-3.52	1.06	-17.82	1.47	-5.33
	159	160	ALA	395	2.77	0.87	10.29	1.28	13.06	1.72	-0.58	0.23	-0.89	0.6	-1.47	0.66	2.27	0.12	1.03	0.91	3.3	0.93	4.46	0.89	10.43	1.55	14.88	1.98	-0.24	0.06	-7.12	0.65	-7.36	0.67	0.43	0.05	0.19	0.03	0.62	0.05	0.2	0.1	-6.94	0.65	-6.74	0.66	4.65	0.91	3.49
	160	161	HIS	396	24.6	1.69	9.9	1.26	34.51	2.21	-5.2	0.86	-0.85	0.85	-6.05	1.31	-11.97	1.38	-7.67	1.14	-19.64	2.02	7.43	1.95	1.38	1.58	8.81	2.64	-3.37	1	-2.95	0.72	-6.31	1.32	0.25	0.1	0.05	0.01	0.3	0.1	-3.12	0.94	-2.89	0.72	-6.01	1.26	4.32	1.72	-1.51
	161	162	ALA	397	2.55	0.91	10.47	1.49	13.01	1.91	-0.38	0.37	-0.02	0.54	-0.4	0.79	1.99	0.11	-2.19	1.13	-0.2	1.11	4.15	1.02	8.25	1.83	12.41	2.3	0.18	0.06	-7.2	0.85	-7.02	0.84	0.23	0.08	0.4	0.05	0.63	0.1	0.41	0.08	-6.8	0.83	-6.39	0.79	4.56	1.03	1.45
	162	163	GLY	398	0	0	9.63	1.85	9.63	1.85	0	0	0.14	0.64	0.14	0.64	0	0	-6.65	0.91	-6.65	0.91	0	0	3.12	1.69	3.12	1.69	0	0	-6.71	0.56	-6.71	0.56	0	0	0.68	0.04	0.68	0.04	0	0	-6.02	0.56	-6.02	0.56	0	0	-2.91
	163	164	ALA	399	2.46	0.84	9.82	1.46	12.29	1.84	-0.66	0.4	0.22	1.08	-0.45	1.15	2.18	0.13	0.58	1.24	2.76	1.25	3.98	0.93	10.62	1.91	14.6	2.33	0.03	0.09	-3.37	0.73	-3.34	0.75	0.17	0.07	0.11	0.03	0.28	0.08	0.2	0.09	-3.26	0.73	-3.06	0.74	4.18	0.94	7.37
	164	165	LYS	400	11.04	2.15	10.36	1.46	21.4	2.87	-2.55	1	-0.96	0.77	-3.5	1.39	-8.18	5.34	-3.79	1.27	-11.98	5	0.31	6.28	5.61	1.66	5.91	6.29	-17.18	4.93	-3.31	1.23	-20.49	4.66	0.54	0.1	0.13	0.04	0.67	0.09	-16.64	4.89	-3.18	1.19	-19.82	4.63	-16.33	2.45	2.43
	165	166	PHE	401	8.06	2.06	11.54	1.5	19.6	2.63	-3.5	0.7	-1.35	0.72	-4.85	0.98	1.05	0.47	-4.58	1.4	-3.53	1.54	5.61	2.25	5.61	1.92	11.22	3.05	-0.43	0.36	-0.85	0.68	-1.28	0.83	0.06	0.05	0.01	0.01	0.07	0.05	-0.37	0.34	-0.84	0.68	-1.21	0.83	5.24	2.16	4.77
	166	167	PRO	402	12.93	1.34	15.08	1.31	28.01	2.18	-3.34	0.73	-1.9	1.01	-5.24	1.35	-5.38	0.86	-5.06	1.62	-10.44	1.35	4.21	1.76	8.11	2.11	12.32	2.67	5	0.76	-6.31	0.77	-1.32	0.36	0.07	0.02	0	0	0.07	0.02	5.07	0.77	-6.31	0.77	-1.24	0.36	9.28	1.53	1.8
	167	168	ILE	403	9.58	1.93	12.64	1.35	22.22	2.51	-3.09	1.08	-1.91	0.84	-5	1.44	-5.14	0.41	1.78	0.98	-3.36	1.01	1.35	1.96	12.51	1.4	13.86	2.47	3.03	0.33	-7.06	0.65	-4.03	0.6	0.06	0.03	0	0.01	0.06	0.03	3.09	0.33	-7.06	0.65	-3.97	0.6	4.43	1.94	5.45
	168	169	LYS	404	11.75	2.31	10.54	1.57	22.29	3.18	-3.59	0.95	-1.88	0.75	-5.47	1.25	-44.68	8.42	-3.24	0.88	-47.92	8.63	-36.51	8.15	5.42	1.47	-31.1	8.28	19.62	7.95	-4.7	0.53	14.92	8.1	0.26	0.07	0	0	0.26	0.07	19.87	7.9	-4.7	0.53	15.17	8.05	-16.64	2.61	0.72
	169	170	TRP	405	11.32	2.28	10.31	1.48	21.63	2.57	-7.62	1.12	-1.93	0.79	-9.55	1.31	-2.6	1.97	-10.22	0.97	-12.82	2.35	1.1	2.69	-1.84	1.4	-0.74	3.22	3.47	0.66	-4.12	0.64	-0.64	0.86	0.13	0.06	0.01	0.01	0.13	0.06	3.6	0.64	-4.11	0.64	-0.51	0.83	4.7	2.58	-5.95
	170	171	THR	406	6.33	1.48	10.34	1.25	16.66	2.08	-2.64	0.95	-1.99	0.7	-4.63	1.36	-24.75	1.3	-7.93	1.02	-32.69	1.9	-21.07	1.85	0.41	1.51	-20.66	2.48	2.15	0.73	-5.91	0.78	-3.76	1.14	0.03	0.02	0.03	0.02	0.07	0.03	2.18	0.72	-5.88	0.77	-3.69	1.13	-18.89	1.67	-5.47
	171	172	ALA	407	2.61	0.78	11.54	1.41	14.15	1.76	-2.24	0.45	-2.26	0.68	-4.51	0.79	2.38	0.11	1.54	1.06	3.92	1.09	2.75	0.88	10.82	1.64	13.56	2.01	-0.19	0.07	-0.64	0.41	-0.83	0.42	0	0	0.01	0.01	0.01	0.01	-0.19	0.07	-0.63	0.41	-0.82	0.42	2.56	0.87	10.19
	172	173	PRO	408	12.46	1.52	14.34	1.3	26.79	2.04	-4.14	0.61	-2.69	0.78	-6.82	0.95	-9.23	0.9	-2.39	1.31	-11.62	1.06	-0.91	1.94	9.26	1.77	8.35	2.2	8.44	0.85	-9.55	0.97	-1.11	0.64	0.03	0.02	0.01	0.01	0.04	0.02	8.46	0.85	-9.54	0.97	-1.08	0.64	7.55	1.62	-0.28
	173	174	GLU	409	7.99	1.59	10.98	1.53	18.98	2.37	-1.86	1.35	-2.04	0.97	-3.91	1.8	-31.04	5.18	-10.4	1.32	-41.45	5.75	-24.91	4.98	-1.47	2.11	-26.38	6.02	-33.89	4.17	-3.47	0.8	-37.36	4.52	0.11	0.04	0.01	0.01	0.12	0.05	-33.78	4.15	-3.45	0.8	-37.24	4.5	-58.7	1.79	-4.92
	174	175	SER	410	3.84	1.02	11.23	1.41	15.07	1.98	-2.3	0.71	-2.64	0.77	-4.94	1.05	-5.36	0.98	-7.16	1.11	-12.52	1.34	-3.82	1.36	1.43	1.6	-2.39	2.41	0.33	0.43	-2.47	0.67	-2.14	0.64	0.01	0.01	0	0	0.01	0.01	0.34	0.43	-2.46	0.67	-2.13	0.64	-3.49	1.35	-1.03
	175	176	LEU	411	9.07	2.11	11.38	1.45	20.45	2.71	-4.41	0.92	-1.73	0.8	-6.14	1.34	-26.45	0.45	-4.55	1.34	-31	1.53	-21.79	2.29	5.1	2.05	-16.69	3.27	2.97	0.29	-5.16	0.72	-2.18	0.79	0.01	0.01	0.02	0.02	0.03	0.02	2.98	0.29	-5.13	0.72	-2.16	0.78	-18.81	2.27	-0.03
	176	177	ALA	412	2.61	0.74	11.63	1.46	14.24	1.71	-1.34	0.32	-1.18	0.73	-2.52	0.78	2.22	0.13	-6.51	1.11	-4.29	1.14	3.48	0.84	3.95	1.76	7.43	2.05	-0.05	0.08	-4.63	0.59	-4.68	0.63	0.09	0.04	0.2	0.04	0.3	0.05	0.04	0.08	-4.43	0.58	-4.39	0.62	3.53	0.83	-0.48
	177	178	TYR	413	8.9	1.99	9.87	1.29	18.77	2.44	0.77	0.74	0.11	0.79	0.88	1.17	-16.3	0.84	-5.84	0.97	-22.14	1.34	-6.63	2.42	4.14	1.45	-2.49	2.88	-6.5	0.82	-3.49	0.92	-9.98	1.2	1.05	0.09	0.19	0.03	1.24	0.09	-5.44	0.79	-3.29	0.91	-8.74	1.17	-12.07	2.16	0.85
	178	179	ASN	414	11.88	1.93	10.3	1.3	22.19	2.54	-1.05	0.61	-0.71	0.74	-1.76	1.09	-77.49	1.37	-3.06	1.56	-80.55	1.79	-66.66	2	6.54	2.07	-60.12	2.53	-8.81	1.19	-2.25	1.25	-11.06	1.36	0.58	0.08	0.11	0.02	0.69	0.08	-8.23	1.14	-2.14	1.24	-10.37	1.34	-74.88	1.63	4.39
	179	180	LYS	415	11.04	2.23	9.72	1.18	20.76	2.55	-1.66	0.79	-0.79	0.87	-2.45	1.23	-2	3.33	-4.11	1.41	-6.11	4.09	7.39	4.15	4.82	1.71	12.2	4.78	-24.77	3	-4.47	0.75	-29.25	3.37	1	0.09	0.03	0.01	1.03	0.09	-23.77	3	-4.44	0.75	-28.21	3.37	-16.38	2.49	0.37
	180	181	PHE	416	7.86	1.97	9.9	1.26	17.76	2.5	-2.15	0.96	-1.11	0.57	-3.26	1.15	0.07	0.62	-11.34	1.2	-11.27	1.31	5.77	2.25	-2.55	1.68	3.23	2.92	-0.18	0.43	-2.79	0.93	-2.97	0.95	0.3	0.12	0.18	0.03	0.49	0.13	0.13	0.37	-2.61	0.91	-2.48	0.89	5.9	2.17	-5.15
	181	182	SER	417	3.11	0.94	9.81	1.23	12.92	1.73	-1.18	0.58	-0.39	1.05	-1.57	1.23	-1.2	1.52	-5.21	1.24	-6.41	2.14	0.73	1.67	4.2	1.77	4.93	2.71	-3.38	1.19	-4.09	0.59	-7.47	1.44	0.29	0.05	0.04	0.02	0.33	0.05	-3.09	1.2	-4.05	0.58	-7.14	1.45	-2.36	1.14	0.15
	182	183	ILE	418	9.6	2.14	11.25	1.34	20.84	2.61	-3.33	0.86	-0.68	0.91	-4.01	1.35	-5.24	0.47	3.08	1.21	-2.16	1.32	1.02	2.17	13.65	1.42	14.68	2.66	3.26	0.43	-7.04	0.57	-3.77	0.66	0.21	0.04	0.03	0.01	0.24	0.04	3.47	0.43	-7.01	0.57	-3.54	0.66	4.5	2.15	6.65
	183	184	LYS	419	11.48	2.66	10.84	1.35	22.32	3.31	-4.53	0.91	-1.63	0.82	-6.16	1.37	-52.56	6.84	-9.17	1.14	-61.74	7	-45.62	6.76	0.04	1.51	-45.57	7.09	28.79	6.29	-3.68	0.52	25.11	6.42	0.33	0.05	0	0	0.33	0.05	29.12	6.28	-3.68	0.52	25.44	6.4	-16.5	3.51	-3.64
	184	185	SER	420	3.63	0.87	11.23	1.51	14.86	1.85	-1.88	0.98	-2.72	0.76	-4.6	1.42	-11.19	1.63	-14.15	1.02	-25.34	1.82	-9.44	1.52	-5.64	1.43	-15.08	2.03	3.43	0.43	-4.5	0.61	-1.07	0.61	0.02	0.01	0.02	0.01	0.03	0.02	3.45	0.43	-4.48	0.61	-1.03	0.61	-5.99	1.32	-10.12
	185	186	ASP	421	4.57	1.33	10.93	1.25	15.51	1.92	-4.72	0.79	-2.13	0.79	-6.86	1.08	-6.5	3.29	-2.1	0.98	-8.61	3.74	-6.65	3.23	6.7	1.55	0.04	3.77	-50.52	2.86	-8.48	0.46	-59	3.13	0.02	0.01	0	0	0.02	0.01	-50.5	2.86	-8.48	0.46	-58.99	3.13	-57.16	1.37	-1.79
	186	187	VAL	422	6.18	1.56	11.36	1.47	17.54	2.25	-3.63	0.79	-1.8	0.7	-5.43	1.07	-20.42	0.44	-6.47	1.05	-26.9	1.14	-17.87	1.75	3.09	1.61	-14.79	2.14	5.54	0.3	-7.27	0.44	-1.72	0.41	0	0	0	0	0	0	5.54	0.3	-7.27	0.44	-1.72	0.41	-12.33	1.73	-4.18
	187	188	TRP	423	11.66	2.45	11.22	1.58	22.88	2.95	-10.64	0.63	-3.54	0.71	-14.18	0.89	6.4	0.64	-9.54	0.96	-3.13	1.09	7.42	2.65	-1.86	1.72	5.57	3.13	-0.17	0.41	-2.92	0.49	-3.09	0.57	0	0	0	0	0	0	-0.17	0.41	-2.92	0.49	-3.09	0.57	7.25	2.6	-4.78
	188	189	ALA	424	2.7	0.77	11.15	1.25	13.85	1.59	-1.89	0.37	-3.26	0.88	-5.15	0.95	2.07	0.13	-8.87	1.02	-6.79	1.04	2.88	0.81	-0.97	1.34	1.91	1.63	-0.11	0.07	-0.97	0.5	-1.08	0.53	0.04	0.01	0	0	0.05	0.02	-0.07	0.06	-0.97	0.5	-1.04	0.52	2.82	0.82	-1.94
	189	190	PHE	425	7.85	1.84	10.22	1.23	18.07	2.25	-4.97	0.65	-2.37	0.87	-7.33	1.12	0.5	0.25	-8.54	0.94	-8.04	1.06	3.38	2.02	-0.68	1.31	2.7	2.51	0.3	0.18	-2.16	0.29	-1.86	0.36	0	0	0	0	0	0	0.3	0.18	-2.16	0.29	-1.86	0.36	3.68	2.03	-2.84
	190	191	GLY	426	0	0	9.39	1.32	9.39	1.32	0	0	-5.2	0.69	-5.2	0.69	0	0	-7.84	1.04	-7.84	1.04	0	0	-3.66	1.51	-3.66	1.51	0	0	-1.19	0.45	-1.19	0.45	0	0	0	0	0	0	0	0	-1.19	0.45	-1.19	0.45	0	0	-4.85
	191	192	VAL	427	6.45	1.79	11	1.22	17.46	2.28	-3.73	0.68	-1.79	0.89	-5.52	1.21	-20.63	0.38	-6.89	1.18	-27.52	1.19	-17.91	1.89	2.33	1.49	-15.58	2.51	5.5	0.31	-6.63	0.5	-1.13	0.43	0	0	0	0	0	0	5.5	0.31	-6.63	0.5	-1.13	0.44	-12.42	1.87	-4.3
	192	193	LEU	428	9.73	1.99	12.01	1.31	21.74	2.37	-3.94	0.95	-2.02	0.84	-5.96	1.34	-28.05	0.37	-3.8	0.94	-31.85	1.01	-22.26	2.2	6.18	1.51	-16.07	2.49	4.17	0.22	-5.19	0.39	-1.02	0.4	0	0	0	0	0	0	4.17	0.22	-5.19	0.39	-1.02	0.4	-18.09	2.17	0.99
	193	194	LEU	429	9.04	2.02	11.39	1.34	20.43	2.57	-4.01	0.91	-2.27	0.78	-6.28	1.29	-27.39	0.37	-5.27	0.93	-32.67	1.03	-22.37	2.35	3.85	1.48	-18.52	2.76	3.88	0.22	-5.12	0.46	-1.23	0.45	0.01	0.01	0.01	0.01	0.02	0.01	3.9	0.22	-5.11	0.46	-1.21	0.45	-18.47	2.34	-1.26
	194	195	TRP	430	10.93	2.28	10.97	1.26	21.91	2.51	-9.63	0.81	-2.91	0.93	-12.54	1.32	4.6	1.1	-13.67	1.07	-9.07	1.42	5.91	2.7	-5.61	1.65	0.3	3.16	1.03	0.48	-2.51	0.34	-1.48	0.65	0.08	0.03	0	0	0.08	0.03	1.11	0.47	-2.51	0.34	-1.4	0.64	7.02	2.56	-8.12
	195	196	GLU	431	6.69	1.93	11.21	1.26	17.89	2.4	-5.64	0.83	-3	0.79	-8.64	1.26	5.64	3.7	-3.66	1.18	1.98	4.06	6.69	3.97	4.55	1.69	11.24	4.55	-60.21	3.38	-8.16	0.6	-68.37	3.64	0	0	0	0	0.01	0.01	-60.2	3.38	-8.16	0.6	-68.36	3.64	-53.52	1.92	-3.61
	196	197	ILE	432	9.75	2.14	12.1	1.39	21.85	2.58	-3.26	1.06	-1.23	0.86	-4.49	1.44	-7.01	0.28	-4.08	1.04	-11.09	1.01	-0.52	2.13	6.79	1.68	6.26	2.65	5.25	0.24	-7.46	0.66	-2.21	0.56	0.03	0.01	0	0	0.03	0.01	5.28	0.25	-7.46	0.66	-2.18	0.55	4.76	2.13	-0.67
	197	198	ALA	433	2.92	0.87	10.89	1.43	13.81	1.77	-1.64	0.36	-2.47	0.71	-4.12	0.8	2.43	0.13	-6.36	0.86	-3.93	0.88	3.71	0.98	2.05	1.26	5.76	1.62	-0.39	0.07	-3.47	0.48	-3.87	0.52	0.03	0.02	0.04	0.03	0.08	0.03	-0.36	0.07	-3.43	0.48	-3.79	0.52	3.35	0.97	-1.38
	198	199	THR	434	6.61	1.51	9.74	1.48	16.34	2.17	-2.58	0.8	-0.4	0.84	-2.98	1.26	-27.87	1.02	-9.81	1.06	-37.69	1.45	-23.84	1.69	-0.47	1.77	-24.32	2.26	2.54	0.32	-4.96	0.71	-2.42	0.68	0.07	0.03	0.1	0.04	0.17	0.06	2.61	0.32	-4.87	0.69	-2.25	0.66	-21.23	1.64	-5.34
	199	200	TYR	435	8.72	2.04	9.28	1.38	18	2.47	-3.16	0.82	-2.02	0.77	-5.18	1.18	-18.63	0.9	-4.16	1.12	-22.79	1.21	-13.08	2.38	3.1	1.66	-9.98	3.03	-2.29	0.77	-4.22	0.89	-6.51	0.98	0.23	0.06	0.03	0.01	0.26	0.07	-2.06	0.74	-4.19	0.88	-6.25	0.96	-15.14	2.27	-1.09
	200	201	GLY	436	0	0	10.68	1.49	10.68	1.49	0	0	-2.39	1.17	-2.39	1.17	0	0	-15.97	2.22	-15.97	2.22	0	0	-7.68	2.24	-7.68	2.24	0	0	1.35	1.04	1.35	1.04	0	0	0.02	0.02	0.02	0.02	0	0	1.37	1.03	1.37	1.03	0	0	-6.31
	201	202	MET	437	6.91	1.67	9.6	1.21	16.51	2.13	-2.63	0.58	-1.37	0.87	-4.01	1.13	-2.12	0.95	-1.33	0.92	-3.45	1.45	2.15	1.74	6.9	1.58	9.05	2.52	1.17	0.69	-7.63	0.54	-6.47	0.95	0.75	0.09	0.04	0.02	0.79	0.08	1.92	0.71	-7.59	0.54	-5.67	0.96	4.07	1.61	-0.7
	202	203	SER	438	3.74	1.08	11.39	1.22	15.13	1.77	-1.2	0.36	-0.27	0.71	-1.47	0.86	-1.82	1.2	4.56	1.34	2.74	2.11	0.72	1.73	15.68	1.6	16.4	2.75	-2.61	1.02	-6.69	1.04	-9.31	1.66	0.35	0.07	0.04	0.02	0.39	0.08	-2.26	1	-6.65	1.03	-8.91	1.62	-1.54	1.34	9.03
	203	204	PRO	439	12.27	1.64	13.15	1.29	25.42	2.24	-4.08	0.64	-2.35	0.91	-6.43	1.14	-9.85	0.95	-1.17	2.84	-11.01	2.52	-1.66	1.86	9.64	2.74	7.98	3.33	9.08	0.86	-8.44	1.83	0.64	1.42	0	0	0	0	0	0.01	9.08	0.85	-8.43	1.83	0.65	1.42	7.42	1.76	1.2
	204	205	TYR	440	8.58	2.69	12.69	1.33	21.27	3.18	-4.25	0.82	-0.69	0.82	-4.95	1.15	-17.42	0.7	2.18	2.15	-15.25	2.18	-13.1	2.77	14.18	2.28	1.08	3.6	-1.83	0.44	-3.26	1.67	-5.09	1.69	0.01	0.01	0.01	0.01	0.01	0.01	-1.82	0.44	-3.26	1.66	-5.08	1.69	-14.92	2.84	10.92
	205	206	PRO	441	11.68	1.15	11.97	1.07	23.65	1.55	-1.64	0.55	-0.43	0.63	-2.07	0.86	-9.83	1.04	6.84	1.79	-2.99	1.33	0.21	1.7	18.38	1.96	18.6	2.02	9.15	0.97	-14.96	1.46	-5.81	1.05	0.36	0.08	0.09	0.02	0.44	0.08	9.51	0.95	-14.87	1.45	-5.36	1.06	9.72	1.31	3.51
	206	207	GLY	442	0	0	9.87	1.54	9.87	1.54	0	0	-0.53	0.43	-0.53	0.43	0	0	-5.1	0.7	-5.1	0.7	0	0	4.24	1.47	4.24	1.47	0	0	-7.44	0.47	-7.44	0.47	0	0	0.69	0.02	0.69	0.02	0	0	-6.75	0.47	-6.75	0.47	0	0	-2.52
	207	208	ILE	443	9.14	1.89	9.57	1.2	18.71	2.38	-2.68	0.96	0.97	0.8	-1.71	1.5	-7.36	0.47	-6.38	1.2	-13.74	1.18	-0.89	2.16	4.15	1.73	3.26	2.99	5.09	0.41	-6.69	1.08	-1.61	1.03	0.14	0.05	0.11	0.04	0.25	0.05	5.22	0.41	-6.58	1.06	-1.36	1	4.33	2.15	-2.43
	208	209	ASP	444	4.39	1.44	9.91	1.34	14.3	2.13	-0.25	1.08	-0.89	0.76	-1.14	1.25	6.86	3.8	-0.9	1.48	5.96	4.44	10.99	3.52	8.12	1.95	19.12	4.52	-74.58	3.43	-9.84	0.97	-84.42	3.9	0.52	0.03	0.07	0.02	0.6	0.04	-74.05	3.43	-9.77	0.97	-83.82	3.89	-63.06	1.45	-1.64
	209	210	LEU	445	9.11	1.98	11.26	1.41	20.37	2.47	-0.24	0.94	-0.64	0.69	-0.88	1.33	-26.79	0.55	-2.76	0.91	-29.55	1.14	-17.92	2.36	7.86	1.49	-10.06	2.95	2.83	0.35	-5.87	0.72	-3.04	0.81	0.51	0.1	0.06	0.03	0.57	0.11	3.34	0.33	-5.81	0.7	-2.47	0.77	-14.58	2.37	2.05
	210	211	SER	446	3.5	0.94	9.87	1.26	13.37	1.58	0.34	0.86	0.18	0.68	0.52	1.26	-8.46	1.31	-7.47	1.34	-15.92	2.07	-4.62	1.29	2.58	1.54	-2.04	2.12	0.62	0.6	-7.61	1.01	-6.99	1.17	0.45	0.03	0.23	0.04	0.68	0.04	1.07	0.58	-7.38	1.02	-6.31	1.18	-3.54	1.08	-4.8
	211	212	GLN	447	13.65	2.02	10.36	1.35	24.01	2.38	-2.47	0.83	-0.72	0.88	-3.18	1.33	-68.81	2.38	-4.85	1.25	-73.67	2.74	-57.63	2.6	4.78	1.63	-52.85	3.03	-5.78	1.34	-3.39	0.64	-9.17	1.5	0.55	0.06	0	0.01	0.55	0.06	-5.23	1.3	-3.39	0.64	-8.62	1.47	-62.86	2.01	1.39
	212	213	VAL	448	6.68	1.73	11.97	1.55	18.65	2.38	-2.64	0.83	-0.86	0.98	-3.49	1.39	-19.98	0.54	-6.17	1.18	-26.16	1.23	-15.94	1.78	4.95	1.88	-11	2.52	5.12	0.4	-7.82	0.62	-2.7	0.59	0	0.01	0	0	0.01	0.01	5.13	0.4	-7.82	0.62	-2.69	0.59	-10.82	1.82	-2.87
	213	214	TYR	449	8.79	2.07	11.12	1.55	19.91	2.69	-2.05	0.89	-1.82	0.84	-3.87	1.36	-18.04	2.84	-6.63	1.45	-24.67	3.79	-11.3	3.69	2.67	1.7	-8.63	4.42	-3.54	2.17	-5.62	1.32	-9.16	3.13	0.48	0.15	0.02	0.02	0.5	0.16	-3.06	2.07	-5.59	1.32	-8.66	3.02	-14.36	2.47	-2.93
	214	215	GLU	450	6.22	1.73	10.9	1.34	17.12	2.43	-1.77	0.75	-1.42	0.96	-3.2	1.27	28.31	8.14	-2.49	3.19	25.82	9.2	32.76	8.37	6.98	3.12	39.75	9.59	-91.08	7.89	-7.42	2.16	-98.5	8.81	0.61	0.08	0.02	0.02	0.62	0.09	-90.48	7.83	-7.4	2.16	-97.88	8.75	-57.72	1.76	-0.41
	215	216	LEU	451	8.9	2.09	11.45	1.55	20.35	2.83	-2.07	0.82	-1.66	0.88	-3.73	1.26	-27.87	0.49	-1.43	1.11	-29.3	1.12	-21.05	2.35	8.36	1.78	-12.69	2.83	4.01	0.3	-6.14	0.57	-2.13	0.55	0.29	0.04	0	0	0.29	0.04	4.31	0.31	-6.14	0.57	-1.84	0.55	-16.74	2.29	2.22
	216	217	LEU	452	9.4	1.94	11.58	1.26	20.98	2.38	-3.14	0.85	-1.85	0.92	-4.99	1.36	-27.21	0.5	-7	1.79	-34.21	1.72	-20.95	2.2	2.73	2.46	-18.22	3.05	3.63	0.3	-5.94	1.13	-2.3	1.05	0.01	0.01	0.01	0.01	0.02	0.01	3.64	0.3	-5.93	1.13	-2.29	1.05	-17.3	2.12	-3.2
	217	218	GLU	453	6.26	1.69	10.59	1.48	16.86	2.33	-1.87	0.74	-0.64	0.67	-2.51	1.17	28.76	6.7	3.6	1.34	32.36	7.43	33.16	7.13	13.55	1.71	46.7	7.75	-91.02	6.73	-11.75	1.2	-102.77	7.35	0.6	0.08	0.18	0.04	0.78	0.09	-90.42	6.69	-11.57	1.22	-101.99	7.32	-57.27	1.59	1.98
	218	219	LYS	454	10.97	2.43	10.06	1.35	21.03	2.94	-0.54	0.98	0.65	0.82	0.11	1.39	-59.61	9.01	-6.64	0.93	-66.26	8.76	-49.19	9.16	4.07	1.62	-45.12	8.95	31.94	8.71	-5.61	0.73	26.33	8.42	0.9	0.08	0.21	0.03	1.11	0.09	32.84	8.64	-5.4	0.72	27.44	8.35	-16.35	2.9	-1.33
	219	220	ASP	455	4.42	1.43	11.31	1.81	15.72	2.45	-0.44	0.64	-0.43	0.73	-0.87	1.12	26.27	7.76	-1.99	1.72	24.28	8.54	30.24	7.54	8.89	2.08	39.14	8.24	-91.46	7	-15.87	1.59	-107.33	7.68	0.71	0.08	0.11	0.03	0.81	0.09	-90.75	6.94	-15.76	1.58	-106.51	7.61	-60.51	1.47	-6.87
	220	221	TYR	456	8.81	2.08	9.22	1.06	18.03	2.3	-1.8	0.64	-0.88	0.84	-2.68	1.05	-16.5	0.53	-3.19	1.27	-19.69	1.33	-9.5	2.18	5.15	1.67	-4.35	2.65	-5.07	0.4	-1.73	0.81	-6.8	0.91	0.52	0.07	0.04	0.01	0.57	0.07	-4.55	0.4	-1.68	0.81	-6.23	0.91	-14.04	2.25	3.47
	221	222	ARG	457	13.43	3.1	9.68	0.91	23.11	3.32	-5.33	1.27	-0.98	0.65	-6.3	1.39	-237.04	7.19	1.76	0.99	-235.28	7.31	-228.93	6.56	10.46	1.48	-218.47	6.67	50.37	5.44	-9	0.96	41.37	5.5	0.32	0.06	0.09	0.03	0.41	0.05	50.69	5.44	-8.91	0.96	41.78	5.5	-178.24	2.7	1.55
	222	223	MET	458	7.05	1.9	9.84	1.49	16.88	2.43	-6.8	0.85	-1.22	0.72	-8.02	1.18	-2.61	0.38	-8.9	1.15	-11.52	1.21	-2.36	2.03	-0.29	1.7	-2.65	2.77	2.24	0.29	-6.93	1.21	-4.69	1.3	0	0.01	0.03	0.02	0.03	0.02	2.25	0.29	-6.9	1.21	-4.65	1.29	-0.12	1.94	-7.19
	223	224	GLU	459	6.19	1.71	9.64	1.17	15.83	2.22	-0.34	0.61	-0.4	0.75	-0.74	1.14	38.52	2.96	4.54	1.25	43.06	3.59	44.37	3.29	13.78	1.56	58.15	4.03	-101.66	3.48	-8.51	0.88	-110.17	3.93	0.97	0.05	0.05	0.02	1.02	0.06	-100.69	3.48	-8.46	0.87	-109.14	3.93	-56.31	1.66	5.33
	224	225	ARG	460	12.9	2.58	11.9	1.12	24.8	2.9	-2.84	1.32	0.15	0.63	-2.69	1.45	-237.09	4.96	12.06	1.24	-225.03	5.14	-227.03	5	24.12	1.63	-202.91	5.28	45.35	3.81	-9.49	0.97	35.86	3.94	0.55	0.06	0.17	0.03	0.72	0.06	45.9	3.79	-9.32	0.98	36.58	3.92	-181.13	2.72	14.8
	225	226	PRO	461	12.38	1.38	13.01	1.26	25.39	2.07	-3.68	0.65	-1.27	0.65	-4.95	0.98	-11.18	0.64	-1.6	1.45	-12.78	1.26	-2.48	1.62	10.14	1.66	7.66	2.24	10.32	0.58	-11.23	1.09	-0.91	0.97	0.01	0.01	0.07	0.02	0.08	0.03	10.33	0.58	-11.16	1.08	-0.83	0.95	7.85	1.5	-1.02
	226	227	GLU	462	6.41	2.06	9.35	1.33	15.76	2.84	-0.16	0.57	-0.19	0.62	-0.36	0.98	32.08	3.67	3.64	1.41	35.72	4.35	38.33	4.19	12.8	1.76	51.13	4.89	-95.68	3.77	-12.63	1.14	-108.31	4.39	1.06	0.07	0.14	0.04	1.2	0.09	-94.62	3.74	-12.49	1.14	-107.11	4.36	-56.3	1.89	0.32
	227	228	GLY	463	0	0	9.82	1.56	9.82	1.56	0	0	-0.94	0.56	-0.94	0.56	0	0	-8.38	1.98	-8.38	1.98	0	0	0.5	2.63	0.5	2.63	0	0	-4.61	1.46	-4.61	1.46	0	0	0.47	0.06	0.47	0.06	0	0	-4.14	1.44	-4.14	1.44	0	0	-3.64
	228	229	CYS	464	3.33	0.94	11.26	1.23	14.6	1.68	-3.56	0.48	1	0.94	-2.56	1.17	5.88	0.88	-1.52	1.71	4.35	1.81	5.65	1.28	10.75	2.13	16.39	2.25	-1.05	0.35	-0.44	1.01	-1.49	1.05	0.01	0.01	0.07	0.02	0.08	0.03	-1.04	0.35	-0.37	1	-1.41	1.04	4.61	1.15	10.37
	229	230	PRO	465	12.38	1.71	13.15	1.38	25.54	2.28	-1.79	0.63	-1.62	0.82	-3.41	1.02	-8.95	0.68	-0.4	1.28	-9.35	1.29	1.64	1.87	11.13	1.7	12.77	2.6	8.66	0.62	-10.54	0.72	-1.89	0.6	0.35	0.07	0.07	0.01	0.42	0.07	9.01	0.62	-10.47	0.72	-1.47	0.6	10.64	1.83	0.66
	230	231	GLU	466	7.22	2.25	11.92	1.58	19.14	2.93	0.63	1.07	-1.6	0.69	-0.97	1.46	0.47	3.55	1.72	1.06	2.19	3.85	8.32	3.59	12.04	1.62	20.36	4.12	-66.52	2.99	-7.52	0.79	-74.03	3.23	0.86	0.04	0.04	0.01	0.9	0.05	-65.66	2.98	-7.48	0.79	-73.13	3.21	-57.34	2.16	4.57
	231	232	LYS	467	11.71	2.58	10.94	1.27	22.65	2.63	-1.36	1.09	-1.56	0.64	-2.92	1.31	-65.3	5.05	-3.12	1.11	-68.42	4.89	-54.95	5.49	6.26	1.52	-48.69	5.45	35.34	4.72	-4.28	0.81	31.06	4.75	0.77	0.11	0.03	0.01	0.79	0.11	36.1	4.68	-4.25	0.81	31.85	4.7	-18.84	2.8	2.01
	232	233	VAL	468	6.07	1.54	11.17	1.23	17.24	1.99	-2.33	0.7	-1.25	1	-3.58	1.33	-20.05	0.44	-11.38	1.03	-31.43	1.11	-16.31	1.67	-1.46	1.43	-17.76	2.15	4.98	0.29	-6.75	0.54	-1.78	0.46	0.08	0.02	0	0	0.08	0.02	5.05	0.28	-6.75	0.54	-1.7	0.45	-11.25	1.65	-8.21
	233	234	TYR	469	8.35	2.09	10.79	1.53	19.14	2.46	-4.59	0.71	-2.66	0.9	-7.25	1.15	-17.38	0.76	-12.23	1.17	-29.61	1.43	-13.63	2.11	-4.09	1.94	-17.72	2.69	-4.13	0.55	-1.48	0.57	-5.61	0.79	0.29	0.07	0	0	0.29	0.07	-3.84	0.54	-1.48	0.57	-5.32	0.79	-17.47	2.12	-5.58
	234	235	GLU	470	6.24	1.88	11.04	1.33	17.28	2.36	-1.25	0.86	-2.09	0.85	-3.34	1.32	4.32	4.37	-2.41	1.31	1.92	4.51	9.31	4.73	6.55	1.51	15.86	5.12	-68.24	4.16	-7.54	0.84	-75.77	4.22	0.55	0.05	0.01	0.01	0.56	0.05	-67.68	4.13	-7.52	0.84	-75.21	4.19	-58.37	1.78	-0.98
	235	236	LEU	471	9.1	1.66	11.81	1.28	20.91	2.32	-3.09	0.83	-1.69	0.84	-4.78	1.24	-27.55	0.52	-4.45	1.13	-32.01	1.16	-21.55	1.87	5.67	1.58	-15.88	2.64	3.82	0.3	-5.1	0.4	-1.28	0.38	0.09	0.03	0.01	0.01	0.1	0.03	3.91	0.3	-5.09	0.4	-1.18	0.38	-17.64	1.86	0.58
	236	237	MET	472	7.55	2.16	11.84	1.21	19.39	2.5	-7.26	0.74	-3.38	0.83	-10.64	1.19	-2.67	0.51	-0.65	1.13	-3.32	1.2	-2.38	2.27	7.82	1.35	5.44	2.63	2.68	0.38	-4.41	0.57	-1.73	0.62	0	0	0	0	0	0	2.68	0.38	-4.41	0.57	-1.73	0.62	0.3	2.16	3.41
	237	238	ARG	473	13.19	2.87	11.37	1.49	24.56	3.25	-4.65	0.78	-2.48	0.64	-7.13	1.08	-209.21	3.88	-5.31	1.4	-214.52	3.59	-200.67	5.02	3.58	1.69	-197.1	4.71	24.73	3.9	-4.7	0.93	20.03	3.71	0.81	0.06	0.03	0.02	0.84	0.07	25.54	3.86	-4.67	0.93	20.87	3.68	-175.13	2.51	-1.1
	238	239	ALA	474	2.74	0.81	10.72	1.32	13.46	1.55	-1.37	0.27	-2.45	0.74	-3.83	0.76	2.36	0.13	-12.92	0.97	-10.56	0.99	3.73	0.83	-4.66	1.25	-0.93	1.63	-0.2	0.06	-0.94	0.69	-1.14	0.7	0.17	0.03	0.04	0.02	0.22	0.03	-0.03	0.07	-0.89	0.68	-0.92	0.69	3.7	0.83	-5.55
	239	240	CYS	475	3.35	1	10.17	1.24	13.52	1.76	-3.83	0.58	-3.38	0.66	-7.21	0.9	5.61	0.58	-9.27	0.96	-3.66	1.05	5.13	1.31	-2.48	1.38	2.65	2	-1.49	0.18	1.38	0.45	-0.12	0.49	0	0	0	0	0	0	-1.49	0.18	1.38	0.45	-0.12	0.49	3.64	1.26	-1.1
	240	241	TRP	476	11.21	2.32	10.19	1.4	21.4	2.97	-9.92	0.71	-1.37	0.89	-11.29	1.19	7.44	0.65	-12.69	1.69	-5.25	1.84	8.73	2.43	-3.87	2.09	4.86	3.43	0.58	0.49	-0.75	0.7	-0.17	0.95	0.01	0.01	0	0.01	0.01	0.01	0.59	0.49	-0.75	0.7	-0.16	0.95	9.32	2.39	-4.61
	241	242	GLN	477	13.6	1.84	9.76	1.16	23.36	2.35	-3.08	0.72	-1.27	0.8	-4.35	1.18	-72.28	3.22	-8.51	1.16	-80.79	3.19	-61.76	3.2	-0.01	1.57	-61.78	3.15	-3.55	2.04	-1.07	0.46	-4.62	1.94	0.52	0.04	0	0.01	0.52	0.04	-3.03	2.04	-1.06	0.46	-4.1	1.94	-64.79	1.85	-1.08
	242	243	TRP	478	11.41	2.4	11.72	1.26	23.13	2.6	-3.78	0.94	-2.07	0.75	-5.86	1.31	10.39	0.84	-7.22	1.58	3.16	1.71	18.01	2.89	2.43	1.6	20.44	3.31	-5.33	0.89	-3.46	0.73	-8.79	1.13	0.74	0.12	0.05	0.02	0.79	0.12	-4.59	0.82	-3.41	0.73	-8	1.07	13.42	2.62	-0.99
	243	244	ASN	479	11.17	1.37	11.85	1.33	23.02	2.06	-1.93	0.58	-0.67	0.81	-2.6	1.11	-81.06	2.65	3.04	1.93	-78.02	4.07	-71.81	3	14.22	1.89	-57.6	4.22	-5.53	2.36	-4.5	0.95	-10.03	3.03	0.56	0.03	0.04	0.01	0.6	0.04	-4.97	2.34	-4.45	0.95	-9.43	3.02	-76.79	1.37	9.76
	244	245	PRO	480	11.89	1.39	14.23	1.16	26.12	1.87	-2.7	0.6	-2.67	0.73	-5.37	0.9	-4.93	1.41	-2.18	2.13	-7.11	2.07	4.27	2.05	9.37	2.32	13.64	2.75	4.59	1.3	-8.2	1.2	-3.61	1.3	0.29	0.05	0	0	0.29	0.05	4.88	1.32	-8.2	1.2	-3.32	1.31	9.15	1.52	1.17
	245	246	SER	481	3.71	1.11	10.18	1.21	13.89	1.84	-0.63	0.36	-0.42	0.6	-1.05	0.79	-2.72	0.87	-6.6	1.53	-9.32	1.66	0.36	1.45	3.16	1.57	3.52	2.29	-2.2	0.69	-8.53	1.33	-10.73	1.43	0.51	0.03	0.19	0.04	0.71	0.04	-1.68	0.69	-8.34	1.31	-10.02	1.42	-1.32	1.32	-5.17
	246	247	ASP	482	4.5	1.55	10.03	1.2	14.53	2.03	-1.16	0.74	-0.69	0.63	-1.86	1	20.38	5.19	9.09	0.94	29.46	5.42	23.71	5.52	18.42	1.46	42.13	5.9	-85.91	5.09	-15.52	0.85	-101.42	5.31	0.47	0.04	0.15	0.03	0.62	0.04	-85.44	5.07	-15.36	0.84	-100.8	5.29	-61.73	1.45	3.06
	247	248	ARG	483	13.24	2.84	10.93	1.36	24.17	3.31	-7.75	1.66	-0.17	0.79	-7.92	1.93	-237.15	4.59	3.6	2.23	-233.54	4.86	-231.66	5.13	14.36	2.33	-217.3	5.62	43.41	3.91	-2.59	1.45	40.82	4.16	0	0	0.03	0.02	0.03	0.02	43.41	3.91	-2.56	1.44	40.85	4.16	-188.25	2.96	11.8
	248	249	PRO	484	12.18	1.42	12.71	1.14	24.9	1.99	-3.23	0.68	-1.89	0.75	-5.12	1.04	-12.94	0.92	-0.4	1.83	-13.34	1.51	-3.99	1.73	10.42	2.01	6.43	2.59	12.33	0.82	-10.41	1.32	1.92	0.96	0.13	0.04	0.04	0.02	0.17	0.05	12.46	0.81	-10.37	1.32	2.08	0.96	8.47	1.48	0.05
	249	250	SER	485	3.34	0.95	9.77	1.21	13.11	1.67	-1.29	0.8	-1.64	0.97	-2.94	1.29	-7.16	3.07	-9.97	1.56	-17.13	3.77	-5.11	2.68	-1.84	1.69	-6.95	3.27	1.27	1.98	-3.94	0.62	-2.67	2.29	0.19	0.04	0	0	0.19	0.04	1.47	1.96	-3.94	0.61	-2.47	2.28	-3.64	1.39	-5.78
	250	251	PHE	486	8.28	1.5	11.35	1.35	19.63	2.28	-6.04	0.75	-2.23	0.95	-8.26	1.12	-0.36	0.27	-10.5	1.31	-10.86	1.28	1.89	1.74	-1.37	1.41	0.51	2.41	0.82	0.17	-2.12	0.58	-1.3	0.6	0	0	0	0	0	0	0.82	0.17	-2.12	0.58	-1.3	0.6	2.71	1.72	-3.5
	251	252	ALA	487	2.85	0.9	11.6	1.38	14.45	1.81	-1.02	0.24	-2.17	0.82	-3.19	0.86	2.35	0.16	-10.17	1.48	-7.81	1.54	4.19	0.98	-0.74	1.81	3.44	2.22	-0.42	0.1	-1.66	0.85	-2.08	0.89	0.28	0.05	0.02	0.02	0.3	0.06	-0.13	0.12	-1.64	0.84	-1.78	0.87	4.05	0.96	-2.39
	252	253	GLU	488	6.03	1.47	11.08	1.25	17.11	1.99	-1.36	1.02	-1.79	0.78	-3.15	1.25	26.96	6.92	0.87	1.03	27.83	7.36	31.63	6.47	10.16	1.55	41.79	7.19	-89.53	5.94	-10.79	0.86	-100.32	6.39	0.67	0.05	0.05	0.02	0.72	0.06	-88.86	5.92	-10.74	0.85	-99.59	6.37	-57.23	1.66	-0.58
	253	254	ILE	489	10.01	2.16	11.51	1.37	21.52	2.54	-3.29	1.17	-1.02	0.93	-4.32	1.51	-7.11	0.33	-3.73	1.12	-10.84	1.08	-0.39	2.44	6.76	1.66	6.37	2.93	5.55	0.31	-6.65	0.59	-1.1	0.48	0	0	0	0	0	0	5.55	0.31	-6.65	0.59	-1.1	0.48	5.16	2.45	0.11
	254	255	HIS	490	25.14	1.72	11.24	1.25	36.38	2.04	-5.92	0.96	-2.19	0.91	-8.11	1.44	-10.2	3.07	-9.01	1.62	-19.21	3.88	9.02	3.84	0.04	1.59	9.06	4.18	-4.65	2.62	-4.64	0.88	-9.29	3.01	0.33	0.12	0.01	0.01	0.33	0.12	-4.32	2.55	-4.63	0.87	-8.95	2.93	4.7	2.05	-4.59
	255	256	GLN	491	14.02	1.84	11.02	1.3	25.04	2.35	-1.48	0.66	-1.15	0.8	-2.63	1.11	-67.55	3.09	-8.39	2.01	-75.93	3.87	-55.01	3.29	1.48	2.16	-53.52	4.1	-7.13	2.42	-4.73	1.03	-11.86	2.7	0.82	0.09	0.04	0.02	0.86	0.09	-6.31	2.36	-4.69	1.02	-11	2.64	-61.31	1.95	-3.21
	256	257	ALA	492	2.75	0.76	11.37	1.29	14.12	1.67	-1.41	0.3	-2.01	0.85	-3.42	0.92	2.49	0.15	-7.38	1.75	-4.89	1.8	3.84	0.82	1.98	2.04	5.82	2.44	-0.44	0.1	-1.57	0.73	-2.01	0.78	0.11	0.04	0.06	0.02	0.16	0.05	-0.33	0.13	-1.52	0.73	-1.85	0.8	3.51	0.82	0.46
	257	258	PHE	493	8.8	1.93	12.02	1.53	20.83	2.56	-4.61	0.76	-2.16	0.92	-6.78	1.24	-0.35	0.41	-10.41	1.37	-10.76	1.42	3.84	2.08	-0.55	1.69	3.28	2.81	0.75	0.21	-2.75	0.63	-1.99	0.65	0.01	0.01	0	0	0.01	0.01	0.76	0.21	-2.74	0.63	-1.99	0.65	4.6	2.11	-3.3
	258	259	GLU	494	6.31	1.78	10.81	1.51	17.12	2.57	-1.77	0.78	-0.87	0.91	-2.64	1.41	46.99	5.23	0.66	2.27	47.65	5.87	51.52	5.78	10.6	2.38	62.12	6.45	-108.76	5.44	-13.4	1.38	-122.16	5.74	0.62	0.1	0.05	0.05	0.68	0.13	-108.13	5.4	-13.35	1.36	-121.48	5.68	-56.62	1.71	-2.74
	259	260	THR	495	6.69	1.75	10.9	1.47	17.59	2.45	-0.5	0.77	-0.14	0.88	-0.64	1.39	-27.55	1.95	-6.23	1.58	-33.78	2.47	-21.36	2.46	4.53	1.95	-16.83	2.95	2.92	1.59	-8.62	1.28	-5.71	1.99	0.55	0.07	0.15	0.06	0.7	0.1	3.47	1.55	-8.47	1.32	-5	1.99	-17.89	1.88	-3.94
	260	261	MET	496	7.12	1.66	11.15	1.43	18.28	2.33	-5.27	0.81	-0.71	0.79	-5.98	1.21	-4.8	0.71	-2.22	1.69	-7.01	1.77	-2.94	2.02	8.22	1.96	5.28	3.06	4.27	0.53	-7.97	1.44	-3.69	1.51	0.14	0.06	0.19	0.04	0.33	0.07	4.41	0.54	-7.78	1.45	-3.36	1.5	1.47	1.87	0.45
	261	262	PHE	497	8.41	2.08	10.46	1.33	18.87	2.53	-1.05	0.85	-0.71	0.78	-1.77	1.25	0.6	0.54	0.22	1.24	0.82	1.34	7.96	2.32	9.96	1.47	17.92	2.72	-0.9	0.48	-5.65	1.01	-6.55	1.19	0.48	0.09	0.09	0.04	0.57	0.11	-0.42	0.44	-5.56	1	-5.98	1.16	7.54	2.2	4.4
	262	263	GLN	498	13.62	2.44	6.6	1.41	20.22	3.18	-1.28	0.82	0.43	0.59	-0.86	1.07	6.68	6.87	-8.4	2.17	-1.72	5.27	19.02	6.86	-1.37	2.49	17.65	5.66	-208.4	6.28	70.16	1.95	-138.23	4.67	1.38	0.08	0.09	0.03	1.47	0.08	-207.01	6.27	70.25	1.94	-136.76	4.66	-187.99	2.45	68.88
	263	264	LIG	499	68.45	6.95	0	0	68.45	6.95	-19.75	2.27	0	0	-19.75	2.27	-752.25	7.32	0	0	-752.25	7.32	-703.56	8.26	0	0	-703.56	8.26	16.59	6	0	0	16.59	6	0.77	0.13	0	0	0.77	0.13	17.35	6.04	0	0	17.35	6.04	-686.2	5.37	0
=>>	RECEPTOR
	Number	Residue	Residue Name	Residue ID	SINT		BINT		TINT		SVDW		BVDW		TVDW		SELE		BELE		TELE		SGAS		BGAS		TGAS		SGB		BGB		TGB		SGBSUR		BGBSUR		TGBSUR		SGBSOL		BGBSOL		TGBSOL		SGBTOT		BGBTOT
	0	1	TRP	235	12.39	2.44	4.01	1	16.4	2.75	-4.07	0.78	-1.83	0.53	-5.89	0.88	-27.27	5.22	-23.53	1.34	-50.8	6.28	-18.94	5.91	-21.35	1.53	-40.29	6.87	-32.71	5.1	-6.2	1.05	-38.91	6	1.08	0.08	0.01	0.01	1.09	0.08	-31.63	5.12	-6.19	1.05	-37.82	6.01	-50.57	2.63	-27.54
	1	2	GLU	236	6.28	2.02	9.43	1.19	15.71	2.41	-0.78	0.85	-0.09	0.62	-0.87	1.09	-5.33	4.5	-3.36	1.45	-8.69	4.87	0.17	4.65	5.98	1.85	6.15	5.05	-58.42	4.83	-4.02	1.29	-62.44	5.3	0.72	0.05	0.21	0.02	0.93	0.04	-57.71	4.82	-3.81	1.27	-61.52	5.28	-57.54	1.89	2.18
	2	3	MET	237	7.08	1.9	10.04	1.31	17.12	2.3	-5.61	0.92	-0.81	0.73	-6.42	1.26	-0.79	0.73	-8.95	1.12	-9.73	1.47	0.68	2.05	0.29	1.77	0.97	2.74	0.48	0.55	-3.13	0.72	-2.65	0.96	0.11	0.04	0.09	0.02	0.2	0.04	0.59	0.55	-3.04	0.72	-2.45	0.96	1.27	1.99	-2.75
	3	4	GLU	238	6.64	1.83	10.08	1.24	16.72	2.36	-0.79	0.9	-1.27	0.82	-2.06	1.37	-19.45	4.43	2.82	1.47	-16.63	4.35	-13.6	4.52	11.63	1.87	-1.97	4.87	-43.98	3.95	-5.39	0.95	-49.37	4.03	0.5	0.05	0.04	0.02	0.53	0.06	-43.49	3.96	-5.35	0.95	-48.84	4.03	-57.09	1.72	6.28
	4	5	ARG	239	13.26	2.7	11.04	1.35	24.31	2.98	-2.73	1.35	-1.76	0.56	-4.49	1.45	-199.02	4.52	-4.73	0.89	-203.76	4.58	-188.49	5.1	4.55	1.47	-183.94	5.2	10.35	4.29	-4.41	0.84	5.94	4.29	0.69	0.1	0.05	0.02	0.75	0.1	11.05	4.24	-4.36	0.83	6.69	4.25	-177.45	2.65	0.2
	5	6	THR	240	6.74	1.6	10.26	1.42	17	2.24	-0.44	0.64	0.9	0.92	0.46	1.32	-20.73	1	-23.53	2.55	-44.26	2.52	-14.43	1.9	-12.38	2.6	-26.8	3.24	-3.61	0.8	0.31	1.95	-3.3	1.85	0.65	0.06	0.09	0.04	0.73	0.08	-2.96	0.8	0.4	1.91	-2.56	1.82	-17.39	1.84	-11.98
	6	7	ASP	241	5.19	1.65	9.86	1.35	15.05	2.24	-2.7	0.68	-0.77	1.02	-3.48	1.24	-24.71	7.86	-9.14	1.63	-33.85	8.49	-22.22	7.95	-0.06	2.14	-22.28	8.63	-35.92	7.82	-2.52	1.46	-38.44	8.31	0.22	0.06	0.02	0.01	0.24	0.06	-35.7	7.77	-2.5	1.46	-38.2	8.26	-57.92	2.12	-2.56
	7	8	ILE	242	9.32	2.13	9.68	1.33	19	2.52	-4.15	0.98	-0.53	0.92	-4.68	1.41	-4.49	0.37	-7.08	1.52	-11.57	1.44	0.69	2.31	2.06	2.01	2.75	3.22	2.31	0.31	-4.24	1.3	-1.93	1.19	0	0.01	0.05	0.02	0.05	0.02	2.31	0.3	-4.2	1.3	-1.88	1.19	3	2.25	-2.13
	8	9	THR	243	6.22	1.49	10.5	1.34	16.72	2.15	-0.99	0.57	-1.02	0.81	-2.01	1.1	-21.86	2.2	-12.57	1.5	-34.43	2.71	-16.62	2.45	-3.09	1.9	-19.71	3.23	-1.94	1.74	-2.43	1.07	-4.38	1.96	0.39	0.06	0.03	0.01	0.42	0.06	-1.55	1.75	-2.41	1.06	-3.96	1.97	-18.17	1.64	-5.5
	9	10	MET	244	7.45	1.66	10.49	1.42	17.94	2.25	-5.31	0.73	-0.75	0.74	-6.06	1.14	-1.55	0.58	1.37	1.42	-0.18	1.64	0.59	1.94	11.1	2.15	11.7	2.84	1.03	0.46	-4.09	1.49	-3.07	1.64	0.2	0.05	0.19	0.03	0.39	0.06	1.23	0.43	-3.91	1.47	-2.68	1.59	1.82	1.79	7.2
	10	11	LYS	245	10.89	1.93	12.09	1.32	22.98	2.24	-1.48	1.01	0.07	0.81	-1.41	1.15	-18.52	15.12	-4.45	1.42	-22.97	14.4	-9.11	15.42	7.7	1.88	-1.41	14.49	-8.29	14.23	-4.31	1.1	-12.6	13.53	0.86	0.15	0.26	0.04	1.12	0.14	-7.43	14.12	-4.05	1.07	-11.48	13.44	-16.54	2.41	3.66
	11	12	HIS	246	25.07	1.89	9.68	1.18	34.76	2.26	-2.39	0.62	-0.96	0.77	-3.35	1.08	-9.63	3.66	-6.42	1.83	-16.05	5.24	13.05	4.24	2.31	1.97	15.35	5.63	-6.66	3.27	-3.59	1.07	-10.26	4.12	0.91	0.09	0.05	0.02	0.96	0.08	-5.75	3.25	-3.55	1.08	-9.29	4.1	7.3	2.03	-1.24
	12	13	LYS	247	10.94	2.56	10.25	1.3	21.19	2.86	-2.56	0.93	-1.3	0.73	-3.86	1.21	-53.79	6.96	-1.94	1.46	-55.74	7.33	-45.41	7.37	7.01	2.1	-38.4	8.03	24.77	6.26	-5.1	1.34	19.67	6.67	0.6	0.08	0.08	0.05	0.68	0.1	25.37	6.21	-5.02	1.32	20.35	6.61	-20.05	2.77	1.99
	13	14	LEU	248	9.41	1.87	9.57	1.44	18.98	2.3	-2.72	0.86	-0.39	0.94	-3.1	1.43	-27.28	0.48	-5.5	1.04	-32.78	1.19	-20.59	2.09	3.68	1.76	-16.9	2.67	3.88	0.32	-6.32	0.77	-2.44	0.87	0.19	0.04	0.06	0.03	0.25	0.05	4.07	0.32	-6.26	0.76	-2.19	0.85	-16.52	2.01	-2.57
	14	15	GLY	249	0	0	8.58	1.64	8.58	1.64	0	0	-1.49	0.67	-1.49	0.67	0	0	-8.02	1.71	-8.02	1.71	0	0	-0.92	2.15	-0.92	2.15	0	0	-4.14	1.42	-4.14	1.42	0	0	0.29	0.05	0.29	0.05	0	0	-3.85	1.4	-3.85	1.4	0	0	-4.78
	15	16	GLY	250	0	0	8.23	1.5	8.23	1.5	0	0	-0.52	0.62	-0.52	0.62	0	0	-1.31	1.57	-1.31	1.57	0	0	6.39	2.11	6.39	2.11	0	0	-9.63	1.15	-9.63	1.15	0	0	0.56	0.05	0.56	0.05	0	0	-9.08	1.13	-9.08	1.13	0	0	-2.68
	16	17	GLY	251	0	0	9.37	1.45	9.37	1.45	0	0	-1.61	0.63	-1.61	0.63	0	0	-4.21	1.24	-4.21	1.24	0	0	3.55	1.97	3.55	1.97	0	0	-6.63	1.22	-6.63	1.22	0	0	0.28	0.09	0.28	0.09	0	0	-6.36	1.2	-6.36	1.2	0	0	-2.8
	17	18	GLN	252	13.22	2.16	10.21	1.35	23.43	2.71	-2.54	1.04	-1.16	0.85	-3.7	1.6	-68.35	3.76	-0.44	1.65	-68.79	4.7	-57.67	4.03	8.61	2.04	-49.06	5.09	-6.02	3.05	-7.16	0.79	-13.18	3.45	0.36	0.06	0.02	0.01	0.38	0.07	-5.66	3.06	-7.14	0.79	-12.79	3.46	-63.32	1.96	1.47
	18	19	TYR	253	8.45	1.98	9.55	1.3	18	2.49	-4.18	0.65	-1.94	0.6	-6.11	0.9	-20.13	1.32	-0.65	1.07	-20.78	1.72	-15.86	2.46	6.96	1.62	-8.89	3.24	-1.51	0.64	-6.01	0.62	-7.52	0.95	0.11	0.03	0.01	0.01	0.12	0.03	-1.4	0.63	-6	0.62	-7.4	0.95	-17.26	2.31	0.96
	19	20	GLY	254	0	0	8.91	1.25	8.91	1.25	0	0	-1.85	0.82	-1.85	0.82	0	0	-7.46	1.6	-7.46	1.6	0	0	-0.4	1.98	-0.4	1.98	0	0	-4.58	1.21	-4.58	1.21	0	0	0.09	0.03	0.09	0.03	0	0	-4.49	1.21	-4.49	1.21	0	0	-4.89
	20	21	GLU	255	6.43	1.74	11.08	1.56	17.51	2.67	-1.66	0.95	-1.73	0.7	-3.39	1.24	-4.45	6.45	-3.51	1.2	-7.96	6.48	0.31	6.17	5.85	1.86	6.16	6.33	-57.83	6.08	-6.68	0.42	-64.51	6.17	0.32	0.05	0.02	0.01	0.34	0.05	-57.51	6.06	-6.66	0.42	-64.17	6.16	-57.2	1.5	-0.82
	21	22	VAL	256	6.2	1.89	10.19	1.22	16.39	2.41	-2.82	0.57	-1.21	0.79	-4.03	1.08	-20.23	0.43	-8.7	0.96	-28.93	0.97	-16.86	1.92	0.28	1.59	-16.58	2.56	5.11	0.33	-5.77	0.58	-0.65	0.43	0.08	0.02	0	0	0.08	0.02	5.19	0.33	-5.77	0.58	-0.57	0.43	-11.66	1.89	-5.49
	22	23	TYR	257	8.82	2.29	10.33	1.33	19.15	2.9	-3.86	0.67	-1.78	1.09	-5.63	1.38	-16.25	1.06	-11.74	0.95	-27.99	1.38	-11.28	2.62	-3.19	1.47	-14.47	3.07	-5.12	0.63	-2.18	0.48	-7.29	0.81	0.44	0.05	0	0	0.44	0.05	-4.67	0.64	-2.18	0.48	-6.85	0.82	-15.96	2.49	-5.37
	23	24	GLU	258	6.36	1.88	9.86	1.49	16.22	2.47	-2.87	0.74	-1.67	0.86	-4.54	1.13	24.14	11.03	-8.08	1.63	16.06	11.44	27.63	10.8	0.11	1.82	27.74	11.24	-84.98	10.58	-3.35	0.71	-88.33	10.74	0.37	0.08	0	0	0.37	0.08	-84.61	10.52	-3.35	0.71	-87.96	10.68	-56.98	1.74	-3.24
	24	25	GLY	259	0	0	8.47	1.25	8.47	1.25	0	0	-3.24	0.72	-3.24	0.72	0	0	-6.28	1.13	-6.28	1.13	0	0	-1.06	1.59	-1.06	1.59	0	0	-4.28	0.93	-4.28	0.93	0	0	0.01	0.02	0.01	0.02	0	0	-4.27	0.92	-4.27	0.92	0	0	-5.32
	25	26	VAL	260	6.01	1.76	10.05	1.4	16.06	2.44	-1.97	0.69	-1.45	0.85	-3.42	1.23	-17.48	0.78	-11.59	1.2	-29.06	1.13	-13.44	1.77	-2.99	1.78	-16.43	2.42	2.32	0.58	-2.71	0.73	-0.39	0.63	0.31	0.08	0	0	0.31	0.08	2.63	0.64	-2.71	0.73	-0.08	0.64	-10.81	1.69	-5.7
	26	27	TRP	261	11.77	2.46	11.71	1.3	23.48	2.75	-6.42	0.9	-2.78	0.8	-9.19	1.22	5.97	2.53	-4.85	1.5	1.12	3.21	11.32	3.62	4.08	1.9	15.4	4.37	-1.26	1.46	-1.45	0.72	-2.71	1.9	0.25	0.07	0	0	0.25	0.07	-1.01	1.45	-1.45	0.72	-2.46	1.89	10.31	2.85	2.63
	27	28	LYS	262	11.41	2.02	12.86	1.76	24.27	2.88	-2.26	0.88	-1.15	0.66	-3.41	1.17	-11.8	6.03	1.24	1.7	-10.57	6.36	-2.65	6.46	12.94	2.3	10.29	7.11	-14.86	6.02	-4.62	0.95	-19.48	6.02	0.72	0.07	0.13	0.03	0.85	0.08	-14.14	5.98	-4.49	0.94	-18.63	5.99	-16.79	2.1	8.45
	28	29	LYS	263	11.49	2.27	11.33	1.61	22.82	3.09	-1.95	1.21	-0.28	0.68	-2.23	1.4	-6.71	6.97	-8.58	1.73	-15.28	6.66	2.83	6.91	2.47	2.15	5.3	7.07	-20.58	6.51	-4.88	1.23	-25.47	6.17	0.84	0.15	0.26	0.04	1.09	0.14	-19.75	6.44	-4.63	1.22	-24.38	6.1	-16.92	2.51	-2.16
	29	30	TYR	264	8.66	2.07	9.72	1.63	18.37	2.81	-0.17	0.86	0.15	0.69	-0.02	1.16	-17.68	1.11	-8.27	0.91	-25.95	1.52	-9.19	2.58	1.6	1.63	-7.6	3.21	-4.85	0.91	-6.27	0.73	-11.12	1.16	0.86	0.09	0.2	0.03	1.05	0.08	-3.99	0.86	-6.07	0.73	-10.06	1.12	-13.18	2.29	-4.47
	30	31	SER	265	3.4	0.88	10.74	1.58	14.13	1.87	-0.11	0.41	-0.02	0.68	-0.13	0.84	-3	0.9	-3.28	1.53	-6.28	1.91	0.29	1.33	7.44	2.13	7.73	2.64	-2.62	0.88	-7.99	1.01	-10.61	1.35	0.55	0.04	0.17	0.04	0.72	0.05	-2.07	0.86	-7.82	0.99	-9.89	1.32	-1.78	0.95	-0.38
	31	32	LEU	266	8.69	1.78	10.7	1.37	19.39	2.29	-0.85	0.93	-0.72	0.85	-1.57	1.41	-26.06	0.44	-6.74	0.99	-32.79	0.98	-18.22	2.13	3.24	1.54	-14.98	2.7	2.1	0.32	-2.5	0.5	-0.4	0.45	0.59	0.09	0.03	0.01	0.61	0.08	2.69	0.32	-2.47	0.5	0.22	0.45	-15.53	2.09	0.77
	32	33	THR	267	6.54	1.45	10.48	1.06	17.03	1.87	-1.69	0.57	-1.38	0.78	-3.07	1.05	-23.19	1.47	-8.5	0.72	-31.69	1.63	-18.33	2.26	0.61	1.34	-17.73	2.74	-0.49	1.06	-4.91	0.55	-5.4	1.11	0.39	0.07	0.04	0.02	0.44	0.07	-0.1	1.04	-4.87	0.55	-4.97	1.09	-18.43	1.67	-4.26
	33	34	VAL	268	5.88	1.73	10.07	1	15.95	2.17	-4.04	0.8	-1.85	0.91	-5.89	1.41	-19.84	0.49	-8.76	1.13	-28.6	1.23	-18	1.83	-0.54	1.54	-18.54	2.32	4.48	0.37	-5.53	0.78	-1.05	0.69	0	0	0	0	0	0	4.49	0.37	-5.53	0.78	-1.05	0.69	-13.52	1.74	-6.07
	34	35	ALA	269	2.62	0.8	10.27	1.08	12.89	1.5	-1.7	0.29	-2.13	0.96	-3.83	0.91	2.1	0.13	-9.25	1.39	-7.15	1.45	3.02	0.86	-1.11	1.6	1.92	2	-0.07	0.05	-0.07	0.43	-0.14	0.44	0.07	0.02	0	0	0.07	0.02	0	0.06	-0.07	0.43	-0.07	0.44	3.02	0.86	-1.17
	35	36	VAL	270	5.98	1.55	10.84	1.22	16.83	2.02	-3.77	0.72	-1.05	0.98	-4.82	1.21	-19.84	0.42	-3.62	0.86	-23.46	0.87	-17.63	1.71	6.16	1.4	-11.46	2.15	4.34	0.29	-5.3	0.42	-0.96	0.37	0	0	0	0	0	0	4.34	0.29	-5.3	0.42	-0.96	0.37	-13.29	1.68	0.86
	36	37	LYS	271	10.51	2.54	10.32	1.1	20.82	3.01	-4.04	0.67	-2.76	0.72	-6.8	1.02	-58.88	7.08	-9.76	0.95	-68.64	7.15	-52.41	7.21	-2.21	1.3	-54.62	7.31	34.27	6.31	-1.13	0.36	33.15	6.31	0.25	0.06	0	0	0.25	0.06	34.53	6.3	-1.12	0.35	33.4	6.3	-17.89	2.6	-3.33
	37	38	THR	272	6.15	1.47	10.36	1.4	16.51	2.14	-2.76	0.62	-2.24	0.71	-5	0.97	-24.46	0.86	-13.57	1.06	-38.03	1.32	-21.06	1.83	-5.46	1.73	-26.52	2.56	1.73	0.57	-3.48	0.7	-1.75	0.83	0.12	0.03	0	0	0.13	0.03	1.85	0.56	-3.48	0.7	-1.62	0.82	-19.21	1.72	-8.93
	38	39	LEU	273	9.26	1.95	10.79	1.36	20.05	2.44	-3.74	0.9	-1.84	0.71	-5.57	1.17	-26.42	0.37	8.4	0.91	-18.01	0.97	-20.89	2.15	17.35	1.61	-3.54	2.65	2.95	0.21	-8.99	0.89	-6.04	0.87	0.04	0.02	0.03	0.01	0.07	0.03	3	0.21	-8.96	0.88	-5.97	0.86	-17.9	2.14	8.39
	39	40	LYS	274	10.97	2.18	17.29	1.55	28.26	2.64	-1.94	0.85	-0.69	0.58	-2.63	1.11	-46.83	5.36	-6.39	0.97	-53.22	5.42	-37.79	5.83	10.21	1.35	-27.59	5.86	19.32	4.82	-7.59	0.6	11.73	4.76	0.41	0.09	0.28	0.03	0.69	0.11	19.74	4.8	-7.31	0.63	12.42	4.73	-18.06	2.53	2.89
	40	41	ASP	276	4.19	1.5	14.11	1.43	18.3	2.26	-1.44	0.47	-0.52	0.77	-1.95	1.08	20.21	2.03	-2.73	1.11	17.48	2.71	22.96	2.49	10.86	1.77	33.82	3.57	-84.86	2.19	-14.08	0.87	-98.94	2.78	0.57	0.05	0.19	0.02	0.75	0.04	-84.29	2.18	-13.89	0.87	-98.18	2.77	-61.34	1.3	-3.03
	41	42	THR	277	5.64	1.38	9.97	1.13	15.62	1.93	-0.63	0.8	0.21	0.79	-0.42	1.24	-23.55	2.63	-4.37	1.31	-27.91	3.03	-18.53	2.83	5.82	1.77	-12.71	3.34	-0.42	1.26	-8.16	1.02	-8.58	1.83	0.38	0.04	0.11	0.03	0.49	0.05	-0.04	1.24	-8.05	1.01	-8.09	1.8	-18.57	1.97	-2.23
	42	43	MET	278	7.43	1.89	10.61	1.5	18.03	2.6	-0.43	0.49	0.24	0.73	-0.18	0.95	-0.6	1.03	-3.23	1.15	-3.83	1.7	6.4	2.18	7.63	1.42	14.02	2.83	-0.5	0.94	-8.41	0.98	-8.92	1.53	1.21	0.07	0.09	0.03	1.3	0.08	0.7	0.92	-8.32	0.97	-7.62	1.51	7.1	2.01	-0.7
	43	44	GLU	279	7.12	2.12	10.58	1.53	17.71	2.64	-1.35	1.37	0.1	0.88	-1.26	1.75	-22.99	7.37	-3.82	1.6	-26.8	7.27	-17.22	7.09	6.86	1.77	-10.35	7.14	-40.33	6.29	-7.54	0.88	-47.87	6.3	0.16	0.07	0.03	0.02	0.19	0.07	-40.17	6.28	-7.51	0.87	-47.68	6.29	-57.38	2.35	-0.64
	44	45	VAL	280	6.54	1.63	10.82	1.38	17.36	2.28	-1.33	0.69	-0.19	0.95	-1.52	1.42	-19.58	0.47	-10.34	0.95	-29.93	0.93	-14.37	1.71	0.28	1.59	-14.09	2.48	5.03	0.39	-6.61	0.94	-1.58	0.79	0.35	0.05	0.04	0.02	0.39	0.06	5.37	0.37	-6.56	0.94	-1.19	0.79	-8.99	1.67	-6.28
	45	46	GLU	281	6.34	1.98	10.03	1.09	16.37	2.46	-0.78	0.68	0.05	0.8	-0.72	1.2	23.97	4.14	-8.9	2.68	15.07	5.67	29.54	4.74	1.18	2.82	30.72	6.39	-87.34	4.25	-6.15	2.2	-93.49	5.54	0.86	0.08	0.11	0.05	0.97	0.1	-86.48	4.23	-6.03	2.17	-92.51	5.48	-56.94	1.98	-4.86
	46	47	GLU	282	6.1	1.98	10.76	1.33	16.86	2.63	-0.82	0.97	-0.19	0.97	-1	1.39	2.35	10.43	-3.3	1.78	-0.95	10.55	7.63	10.35	7.28	1.87	14.91	10.59	-66.96	9.61	-7.99	1.07	-74.95	9.76	0.54	0.06	0.01	0.01	0.55	0.06	-66.41	9.58	-7.98	1.07	-74.4	9.73	-58.78	2.03	-0.7
	47	48	PHE	283	7.88	2	12.21	1.24	20.1	2.32	-5.11	0.67	-2.49	0.83	-7.59	1.16	1.02	0.43	-3.67	1.1	-2.65	1.31	3.8	2.28	6.05	1.43	9.85	2.81	-0.53	0.31	-3.93	0.69	-4.46	0.87	0.03	0.03	0.01	0.01	0.04	0.03	-0.5	0.3	-3.92	0.69	-4.42	0.86	3.3	2.24	2.13
	48	49	LEU	284	8.84	1.8	10.99	1.31	19.82	2.39	-2.14	0.87	-1.2	0.78	-3.34	1.27	-25.31	0.42	2.06	1.12	-23.25	1.12	-18.61	2.1	11.85	1.73	-6.76	2.93	2	0.3	-3.8	0.93	-1.8	0.86	0.33	0.06	0.03	0.01	0.36	0.06	2.33	0.29	-3.77	0.93	-1.44	0.86	-16.28	2.04	8.08
	49	50	LYS	285	11.28	2.49	11.28	1.55	22.56	3.07	-0.84	0.65	-1.13	0.6	-1.97	0.91	-26.47	8.03	-10.2	1.18	-36.67	7.56	-16.03	8.63	-0.05	1.82	-16.07	8.29	-0.98	8.1	-2.58	1.19	-3.56	7.5	1.11	0.08	0.07	0.03	1.18	0.08	0.13	8.03	-2.51	1.17	-2.38	7.44	-15.9	2.69	-2.56
	50	51	GLU	286	6.01	1.63	11.52	1.36	17.53	2.16	-1.8	0.72	-1.06	0.79	-2.87	1.05	31.45	7.22	-11.26	1.53	20.19	7.42	35.66	7.13	-0.81	2.2	34.85	7.86	-90.98	6.87	-7	1.04	-97.98	7.14	0.5	0.08	0.06	0.02	0.55	0.07	-90.48	6.83	-6.94	1.03	-97.42	7.1	-54.82	1.58	-7.75
	51	52	ALA	287	2.85	0.86	11.05	1.52	13.91	1.93	-1.75	0.29	-2.29	0.71	-4.03	0.75	2.34	0.13	-7.77	1.02	-5.43	1.03	3.45	0.95	1	1.75	4.45	2.09	-0.38	0.06	-0.62	0.72	-1	0.75	0.01	0.01	0.01	0.01	0.02	0.01	-0.37	0.07	-0.61	0.71	-0.98	0.75	3.08	0.93	0.39
	52	53	ALA	288	2.91	0.84	10.9	1.38	13.81	1.86	-0.96	0.32	-1.56	0.74	-2.52	0.75	2.26	0.16	-3.45	1.39	-1.2	1.38	4.2	0.92	5.89	1.51	10.09	1.91	-0.28	0.13	-3.32	1.26	-3.6	1.27	0.27	0.04	0.05	0.02	0.32	0.05	-0.01	0.15	-3.27	1.25	-3.28	1.26	4.19	0.89	2.62
	53	54	VAL	289	6.35	1.6	11.05	1.35	17.41	2.19	-0.65	0.88	-0.37	0.92	-1.02	1.37	-20.73	0.6	-7.1	1.6	-27.83	1.54	-15.02	1.94	3.58	1.63	-11.44	2.77	5.52	0.51	-5.92	1.1	-0.39	1.07	0.42	0.07	0.01	0.01	0.42	0.07	5.94	0.5	-5.91	1.1	0.03	1.03	-9.08	1.89	-2.33
	54	55	MET	290	7.35	1.64	10.8	1.37	18.15	2.17	-4.54	0.61	-1.95	0.62	-6.49	0.91	-2.6	0.56	0.19	1.22	-2.41	1.33	0.22	1.86	9.03	1.64	9.25	2.55	2.33	0.52	-4.99	0.82	-2.66	0.86	0.24	0.04	0.02	0.01	0.25	0.05	2.57	0.52	-4.98	0.82	-2.4	0.85	2.79	1.78	4.06
	55	56	LYS	291	10.99	2.4	10.81	1.47	21.8	3.05	-3.26	0.77	-1.04	0.74	-4.3	1.16	-7.58	5.05	-11.61	1.92	-19.2	4.63	0.15	5.3	-1.84	2.49	-1.69	5.44	-17.65	4.94	-0.88	1.69	-18.53	4.58	0.55	0.09	0.07	0.04	0.63	0.09	-17.09	4.93	-0.81	1.67	-17.9	4.58	-16.95	2.38	-2.65
	56	57	GLU	292	5.92	1.76	10.62	1.61	16.54	2.6	-1.77	0.52	-0.03	0.9	-1.81	1.03	17.54	5.14	-11.1	2.81	6.44	6.93	21.69	5.13	-0.51	2.7	21.17	6.76	-79.61	5.08	-4.86	2.16	-84.47	6.55	0.66	0.06	0.15	0.06	0.81	0.1	-78.95	5.05	-4.71	2.12	-83.65	6.48	-57.26	1.53	-5.22
	57	58	ILE	293	9.72	2.03	10.55	1.59	20.27	2.86	-2.58	1.06	-0.32	0.87	-2.89	1.62	-6.38	0.46	5.21	1.27	-1.16	1.41	0.77	2.06	15.44	1.57	16.21	2.73	4.11	0.42	-8.77	0.72	-4.66	0.73	0.11	0.05	0.02	0.02	0.13	0.05	4.21	0.44	-8.74	0.72	-4.53	0.74	4.98	2.07	6.7
	58	59	LYS	294	10.8	2.45	10.62	1.46	21.42	3	-0.64	0.91	-0.86	0.66	-1.51	1.28	-9.58	6.5	-3.81	1.34	-13.39	6.27	0.57	7.33	5.95	1.7	6.53	7.26	-16.97	6.49	-2.11	0.99	-19.08	6.12	1.03	0.13	0.08	0.03	1.11	0.12	-15.95	6.45	-2.03	0.98	-17.97	6.08	-15.37	2.62	3.92
	59	60	HIS	295	24.79	1.7	11.08	1.2	35.87	2.27	-6.73	0.8	-0.28	0.79	-7.01	1.11	-12.92	1.23	-0.17	1	-13.1	1.72	5.14	2.1	10.62	1.6	15.77	2.81	-1.87	1.1	-4.74	0.7	-6.61	1.47	0.22	0.04	0.05	0.02	0.27	0.04	-1.65	1.09	-4.69	0.69	-6.35	1.45	3.49	1.84	5.93
	60	61	PRO	296	12.28	1.51	14.2	1.59	26.48	2.45	-1.08	0.5	-1.39	0.6	-2.47	0.72	-7.7	0.84	-0.97	1.4	-8.67	1.13	3.5	1.79	11.84	1.97	15.34	2.51	7.04	0.8	-9.71	1.14	-2.67	0.87	0.68	0.03	0.09	0.02	0.77	0.04	7.72	0.8	-9.62	1.13	-1.9	0.85	11.22	1.58	2.22
	61	62	ASN	297	11.24	1.49	10.24	1.33	21.48	2.04	-4.27	0.65	-0.94	0.99	-5.2	1.26	-81.68	1.26	-7.88	0.9	-89.56	1.44	-74.7	1.78	1.42	1.39	-73.28	2.17	-3.75	0.89	-0.93	0.33	-4.68	0.88	0.13	0.02	0	0	0.13	0.02	-3.62	0.88	-0.93	0.33	-4.55	0.87	-78.32	1.5	0.5
	62	63	LEU	298	8.96	1.89	10.34	1.34	19.3	2.48	-3.23	0.94	-2.11	0.95	-5.33	1.39	-27.79	0.42	-1.73	1.25	-29.52	1.24	-22.06	2.03	6.5	1.88	-15.55	2.87	3.88	0.31	-4.55	0.83	-0.67	0.72	0.09	0.04	0	0	0.09	0.04	3.97	0.29	-4.54	0.83	-0.58	0.71	-18.09	2.03	1.96
	63	64	VAL	299	6.61	1.64	10.31	1.25	16.92	2.19	-2.73	0.79	-1.52	0.67	-4.25	1.15	-21.19	0.53	-6.61	0.95	-27.8	1.08	-17.31	1.79	2.18	1.55	-15.13	2.31	6.4	0.36	-8.49	0.7	-2.08	0.6	0.06	0.02	0.01	0.01	0.07	0.02	6.46	0.36	-8.47	0.7	-2.01	0.61	-10.85	1.77	-6.29
	64	65	GLN	300	13.89	1.88	10.97	1.22	24.86	2.34	-2.39	0.77	-2.29	0.72	-4.68	1.12	-71.45	5.84	-5.18	1.15	-76.63	5.91	-59.95	5.7	3.5	1.3	-56.45	6.17	-2.97	4.79	-4.32	0.59	-7.29	5.02	0.48	0.12	0.01	0.01	0.49	0.13	-2.49	4.71	-4.31	0.59	-6.8	4.94	-62.44	2	-0.81
	65	66	LEU	301	9.33	2.21	10.81	1.34	20.15	2.75	-3.8	0.98	-1.89	0.67	-5.69	1.16	-26.42	0.45	1.05	1.02	-25.37	1.01	-20.89	2.5	9.97	1.65	-10.92	3.12	2.51	0.38	-5.31	0.93	-2.8	0.88	0.01	0.01	0.07	0.03	0.08	0.03	2.52	0.38	-5.24	0.92	-2.72	0.87	-18.37	2.51	4.73
	66	67	LEU	302	8.81	2.04	10.56	1.3	19.36	2.31	-2.91	0.87	-0.98	0.72	-3.88	1.14	-25.94	0.47	-5.66	1.02	-31.6	0.92	-20.04	2.2	3.92	1.63	-16.12	2.34	2.47	0.33	-3.71	0.78	-1.23	0.71	0.19	0.06	0.11	0.03	0.31	0.06	2.67	0.32	-3.59	0.77	-0.93	0.7	-17.37	2.12	0.32
	67	68	GLY	303	0	0	8.27	1.5	8.27	1.5	0	0	-3.39	0.71	-3.39	0.71	0	0	-8.48	0.94	-8.48	0.94	0	0	-3.6	1.52	-3.6	1.52	0	0	-3.05	0.4	-3.05	0.4	0	0	0	0	0	0	0	0	-3.05	0.4	-3.05	0.4	0	0	-6.65
	68	69	VAL	304	6.08	1.78	9.87	1.39	15.95	2.18	-2.73	0.81	-1.75	0.93	-4.48	1.32	-18.04	0.53	-12.97	0.95	-31.01	0.89	-14.68	1.96	-4.86	1.48	-19.54	2.24	2.59	0.43	-2.58	0.57	0	0.41	0.05	0.03	0	0	0.05	0.03	2.64	0.45	-2.58	0.57	0.05	0.41	-12.05	1.9	-7.44
	69	70	CYS	305	3.29	0.89	10.68	1.3	13.97	1.72	-3.7	0.49	-2.59	0.74	-6.29	0.91	5.65	0.63	-7.66	1.13	-2.01	1.24	5.24	1.09	0.43	1.58	5.66	2	-1.01	0.27	-1.07	0.51	-2.08	0.6	0.01	0	0	0	0.01	0	-1	0.27	-1.07	0.51	-2.07	0.6	4.24	1.05	-0.64
	70	71	THR	306	6.07	1.26	11.18	1.27	17.25	2.03	-0.93	0.9	-0.42	0.61	-1.35	1.17	-28.56	3.23	-0.34	1.02	-28.9	3.71	-23.42	3.24	10.42	1.47	-13	3.98	1.73	1.61	-7.38	0.57	-5.65	1.79	0.15	0.05	0.11	0.02	0.26	0.05	1.88	1.58	-7.27	0.56	-5.39	1.77	-21.54	2.02	3.15
	71	72	ARG	307	12.84	2.75	11.01	1.62	23.85	3.06	-0.7	1.27	-0.11	0.7	-0.81	1.58	-211.11	5.36	-4.97	1	-216.08	5.63	-198.97	5.89	5.93	1.73	-193.04	6.27	18.78	4.37	-6.33	0.68	12.45	4.56	1.03	0.05	0.22	0.02	1.25	0.05	19.81	4.35	-6.11	0.68	13.7	4.54	-179.16	2.85	-0.18
	72	73	GLU	308	6.22	1.83	11.31	1.2	17.53	2.31	-1.95	1.12	-0.05	0.67	-2	1.32	-19.29	6.49	1.11	1.08	-18.18	6.36	-15.01	6.38	12.36	1.68	-2.65	6.35	-43.2	5.71	-7.76	0.92	-50.95	5.52	0.32	0.07	0.02	0.01	0.34	0.07	-42.88	5.67	-7.74	0.92	-50.61	5.49	-57.89	1.89	4.62
	73	74	PRO	309	12.01	1.29	14.44	1.17	26.45	1.83	-1.14	0.65	0.24	0.64	-0.9	0.94	-7.08	0.82	8.69	2.22	1.62	1.66	3.79	1.82	23.37	2.52	27.16	2.52	6.52	0.8	-9.69	2.02	-3.17	1.44	0.64	0.09	0.1	0.04	0.74	0.09	7.17	0.75	-9.59	1.99	-2.42	1.43	10.96	1.55	13.78
	74	75	PRO	310	12.07	1.21	12.97	1.05	25.04	1.82	-2.04	0.51	-1.97	0.6	-4.01	0.79	-8.35	1.17	3.87	1.77	-4.49	0.88	1.68	1.66	14.87	2.1	16.55	2.22	7.47	1.1	-10.36	1.61	-2.88	0.76	0.41	0.06	0.01	0.01	0.41	0.06	7.88	1.11	-10.35	1.61	-2.47	0.73	9.56	1.32	4.52
	75	76	PHE	311	8.11	2.04	9.48	1.33	17.58	2.64	-2.96	0.81	-2.89	0.7	-5.85	1.26	0.52	0.34	-5.38	0.87	-4.87	0.95	5.67	2.21	1.2	1.47	6.87	2.76	-0.59	0.33	-3.37	0.48	-3.96	0.59	0.28	0.06	0	0	0.28	0.06	-0.31	0.32	-3.37	0.48	-3.68	0.58	5.36	2.21	-2.17
	76	77	TYR	312	8.62	2.16	9.51	1.33	18.13	2.72	-4.14	0.61	-3.34	0.68	-7.48	0.9	-15.1	0.77	-7.36	0.8	-22.46	1.13	-10.62	2.21	-1.19	1.42	-11.8	2.64	-5.12	0.62	-0.65	0.35	-5.77	0.66	0.23	0.04	0	0	0.23	0.04	-4.89	0.62	-0.65	0.35	-5.55	0.66	-15.51	2.23	-1.84
	77	78	ILE	313	9.36	1.82	10.71	1.23	20.07	2.31	-2.61	1.1	-1.82	0.99	-4.43	1.59	-5.26	0.41	-5.42	0.87	-10.68	0.87	1.49	2.2	3.47	1.59	4.96	2.55	3.35	0.35	-4.72	0.44	-1.37	0.39	0.06	0.02	0	0	0.06	0.02	3.41	0.35	-4.72	0.44	-1.31	0.39	4.9	2.11	-1.25
	78	79	ILE	314	10.49	1.78	10.88	1.26	21.36	2.07	-4.75	1.03	-1.54	0.94	-6.29	1.43	-4.72	0.33	-11.22	1.14	-15.94	1.15	1.01	1.96	-1.88	1.41	-0.87	2.38	2.89	0.3	-2.6	0.52	0.29	0.43	0	0	0	0	0	0	2.89	0.3	-2.6	0.52	0.29	0.43	3.9	1.92	-4.49
	79	80	THR	315	6.34	1.26	10.14	1.13	16.47	1.83	-2.86	0.64	-1.81	0.81	-4.67	1.09	-23.3	0.85	-16.36	1.13	-39.66	1.47	-19.82	1.36	-8.04	1.43	-27.86	1.88	0.66	0.68	-1.65	0.45	-0.98	0.68	0.15	0.02	0	0	0.15	0.02	0.82	0.68	-1.65	0.45	-0.83	0.68	-19.01	1.34	-9.68
	80	81	GLU	316	6.46	1.8	9.66	1.4	16.11	2.24	-2.42	1.12	-1.74	0.81	-4.16	1.35	-8.81	6.13	2.52	1.26	-6.29	6.48	-4.77	6.53	10.43	1.87	5.66	6.94	-54.45	5.3	-10.6	0.94	-65.05	5.7	0.16	0.03	0.02	0.01	0.18	0.03	-54.29	5.29	-10.58	0.94	-64.87	5.7	-59.06	2.29	-0.15
	81	82	PHE	317	7.95	2.02	9.86	1.41	17.81	2.4	-2.22	0.62	-1.65	0.67	-3.87	0.95	0.56	0.49	-2.52	0.96	-1.96	1.02	6.29	2.24	5.69	1.5	11.98	2.43	-0.86	0.42	-5.17	0.72	-6.03	0.84	0.32	0.07	0.13	0.02	0.45	0.07	-0.54	0.4	-5.04	0.72	-5.58	0.84	5.75	2.2	0.64
	82	83	MET	318	7.25	2.03	11.08	1.46	18.32	2.66	-6.02	0.75	-1.86	0.64	-7.87	1.08	-3.09	0.55	-1.82	0.83	-4.9	1.01	-1.86	2.27	7.4	1.71	5.54	3.18	2.91	0.47	-6.74	0.66	-3.83	0.83	0.04	0.02	0.07	0.02	0.1	0.03	2.94	0.46	-6.67	0.65	-3.73	0.82	1.09	2.15	0.73
	83	84	THR	319	6.57	1.45	12.41	1.68	18.98	2.44	-1.18	0.66	-0.48	0.63	-1.66	1.09	-26.06	2.26	-6.79	1.01	-32.85	2.82	-20.67	2.79	5.14	1.74	-15.53	3.69	1.78	1.29	-9.29	0.72	-7.51	1.78	0.4	0.07	0.18	0.03	0.58	0.08	2.18	1.26	-9.11	0.71	-6.93	1.73	-18.49	1.92	-3.97
	84	85	TYR	320	8.75	1.95	8.96	1.22	17.71	2.29	-0.67	0.83	-0.72	0.76	-1.39	1.19	-18.29	0.73	-1.71	1	-20	1.08	-10.21	2.25	6.53	1.4	-3.68	2.45	-3.88	0.64	-7.87	0.8	-11.76	0.76	0.75	0.09	0.14	0.03	0.88	0.08	-3.14	0.62	-7.73	0.79	-10.87	0.75	-13.35	2.16	-1.2
	85	86	GLY	321	0	0	8.15	1.28	8.15	1.28	0	0	-2.1	0.77	-2.1	0.77	0	0	-9.24	1.14	-9.24	1.14	0	0	-3.18	1.43	-3.18	1.43	0	0	-2.4	0.73	-2.4	0.73	0	0	0.12	0.03	0.12	0.03	0	0	-2.28	0.73	-2.28	0.73	0	0	-5.46
	86	87	ASN	322	11.55	1.42	9.98	1.22	21.54	2.02	-4.44	0.89	-2.58	0.64	-7.02	1.21	-81.91	1.28	-2.18	1.28	-84.08	1.84	-74.79	1.82	5.22	1.66	-69.57	2.68	-3.41	0.93	-4.41	0.93	-7.82	1.43	0.02	0.01	0	0	0.02	0.01	-3.39	0.93	-4.41	0.93	-7.79	1.42	-78.18	1.56	0.82
	87	88	LEU	323	8.77	1.77	11.96	1.42	20.73	2.25	-4.45	0.86	-2.52	0.93	-6.97	1.19	-28.81	0.37	-0.18	0.94	-28.98	1.01	-24.49	1.95	9.26	1.78	-15.22	2.56	5.04	0.23	-7.75	0.55	-2.7	0.55	0	0	0	0	0	0	5.04	0.23	-7.75	0.55	-2.7	0.55	-19.44	1.96	1.52
	88	89	LEU	324	8.35	1.75	11.57	1.27	19.92	2.2	-2.84	0.99	-2.79	0.72	-5.64	1.37	-28.59	0.43	-4.54	0.96	-33.14	1.06	-23.09	2.11	4.23	1.45	-18.86	2.43	4.64	0.33	-7.27	0.67	-2.63	0.67	0.17	0.04	0	0	0.17	0.04	4.81	0.33	-7.27	0.67	-2.46	0.67	-18.29	2.1	-3.03
	89	90	ASP	325	4.35	1.25	10.5	1.27	14.85	1.81	-2.41	0.49	-2.2	0.74	-4.61	0.95	50.77	6.99	3.58	1.72	54.35	7.55	52.71	7.16	11.87	1.91	64.59	7.84	-114.4	6.77	-18.69	1.61	-133.09	7.17	0.41	0.06	0.02	0.02	0.43	0.07	-113.99	6.77	-18.67	1.61	-132.66	7.17	-61.28	1.35	-6.8
	90	91	TYR	326	8.1	1.88	11.33	1.33	19.44	2.4	-4.17	0.67	-1.9	0.81	-6.07	1.07	-20.4	1.52	-4.69	1.54	-25.09	1.98	-16.46	2.45	4.74	1.74	-11.72	3.11	-0.58	1.01	-5.15	0.69	-5.72	1.1	0.16	0.05	0.03	0.02	0.19	0.06	-0.42	0.99	-5.11	0.68	-5.53	1.08	-16.88	2.08	-0.37
	91	92	LEU	327	9.1	2.04	11.6	1.47	20.71	2.62	-4.9	0.8	-2.12	0.82	-7.02	1.24	-28.87	0.43	5.26	1.44	-23.61	1.42	-24.67	2.22	14.74	1.88	-9.93	2.57	5.5	0.27	-7.48	1.03	-1.98	0.96	0	0	0.01	0.01	0.01	0.01	5.5	0.27	-7.47	1.03	-1.97	0.95	-19.17	2.16	7.27
	92	93	ARG	328	12.9	2.8	10.8	1.33	23.71	3.33	-3.78	0.92	-0.57	0.66	-4.35	1.26	-235.98	5.6	-9.5	1.26	-245.48	5.44	-226.86	5.99	0.74	1.68	-226.12	6.21	50.44	5.19	-5.15	1.07	45.29	5.07	0.78	0.05	0.23	0.04	1.01	0.07	51.22	5.17	-4.92	1.07	46.3	5.05	-175.64	2.73	-4.18
	93	94	GLU	329	6.32	1.85	10.74	1.58	17.06	2.53	-0.6	0.71	0.43	0.73	-0.17	1.27	65.06	4.73	-4.21	1.45	60.85	4.47	70.78	4.75	6.96	1.65	77.74	4.73	-127.88	4.19	-14.07	0.99	-141.95	4.08	0.9	0.08	0.2	0.04	1.1	0.06	-126.98	4.24	-13.87	1.01	-140.85	4.11	-56.2	1.69	-6.91
	94	95	CYS	330	3.44	0.92	10.19	1.38	13.63	1.77	-3.3	0.52	-0.52	0.75	-3.81	0.9	6.17	1.16	-6.57	1.39	-0.4	1.9	6.31	1.58	3.09	1.71	9.41	2.59	-1.52	0.7	-1.7	1.26	-3.22	1.53	0.01	0.01	0.13	0.03	0.14	0.04	-1.52	0.7	-1.57	1.24	-3.08	1.52	4.8	1.21	1.53
	95	96	ASN	331	11.35	1.87	10.64	1.28	21.99	2.45	-1.52	0.61	-0.92	0.89	-2.44	1.23	-82.07	2.8	1.64	2.29	-80.42	4.42	-72.24	3.12	11.37	2.16	-60.87	4.57	-5.44	2.36	-4.39	0.99	-9.82	3.11	0.58	0.06	0.1	0.02	0.67	0.06	-4.86	2.32	-4.29	0.99	-9.15	3.09	-77.1	1.74	7.08
	96	97	ARG	332	12.91	2.56	11.39	1.41	24.29	3.09	-3.15	0.83	-0.78	0.66	-3.93	1.15	-226.61	4.65	-2.02	1.09	-228.64	4.75	-216.86	5.3	8.59	1.65	-208.27	5.41	41.77	4.42	-7.43	0.82	34.34	4.43	0.97	0.06	0.15	0.04	1.12	0.07	42.74	4.39	-7.28	0.83	35.45	4.4	-174.12	2.27	1.3
	97	98	GLN	333	13.88	2.55	11.14	1.72	25.03	2.98	-0.19	0.6	0.53	0.91	0.33	1.25	-64.27	2.16	-11.38	1.52	-75.65	2.92	-50.58	2.69	0.28	2.12	-50.29	3.45	-10.61	1.68	-5.82	1.36	-16.43	2.52	1.05	0.05	0.18	0.08	1.24	0.08	-9.55	1.67	-5.64	1.31	-15.19	2.48	-60.13	2.13	-5.36
	98	99	GLU	334	6.1	1.83	11.13	1.37	17.23	2.31	-1.54	0.76	-0.6	0.78	-2.14	1.18	44.15	4.07	1.66	1.56	45.81	4.43	48.71	4.37	12.19	1.67	60.9	4.89	-106.17	4.36	-11.66	1.08	-117.84	4.69	0.66	0.1	0.11	0.03	0.77	0.11	-105.51	4.31	-11.56	1.07	-117.07	4.64	-56.8	1.86	0.64
	99	100	VAL	335	5.82	1.49	10.74	1.46	16.56	2.3	-2.9	0.83	-1.05	0.92	-3.95	1.3	-22.97	0.5	-1.48	1.36	-24.46	1.57	-20.05	1.83	8.2	1.67	-11.85	2.51	7.71	0.4	-10.8	0.88	-3.1	0.94	0	0.01	0.01	0.01	0.01	0.01	7.71	0.4	-10.8	0.88	-3.09	0.93	-12.34	1.76	-2.6
	100	101	ASN	336	11.5	1.85	10.23	1.31	21.73	2.29	-1.91	0.6	-0.49	0.97	-2.4	1.24	-81.29	2.54	-7.94	1.12	-89.24	2.9	-71.7	2.85	1.79	1.67	-69.9	3.81	-5.41	2.15	-3.22	0.5	-8.63	2.36	0.49	0.07	0.03	0.01	0.52	0.08	-4.92	2.11	-3.19	0.49	-8.11	2.32	-76.61	1.62	-1.4
	101	102	ALA	337	2.76	0.78	11.1	1.55	13.85	1.86	-0.75	0.24	-1.56	0.63	-2.31	0.74	2.2	0.13	-3.51	0.94	-1.31	0.98	4.21	0.83	6.02	1.62	10.23	2.04	-0.23	0.07	-3.52	0.67	-3.75	0.69	0.28	0.09	0.08	0.02	0.36	0.1	0.05	0.08	-3.45	0.66	-3.39	0.64	4.26	0.83	2.58
	102	103	VAL	338	6.58	1.81	10.87	1.2	17.44	2.37	0.22	0.72	-0.32	0.84	-0.1	1.13	-22.01	0.47	-3.71	1.14	-25.73	1.27	-15.21	1.9	6.83	1.51	-8.38	2.65	6.75	0.38	-9.1	0.64	-2.35	0.66	0.68	0.05	0.01	0.01	0.68	0.05	7.43	0.38	-9.09	0.64	-1.67	0.66	-7.79	1.89	-2.26
	103	104	VAL	339	6.08	1.47	11.3	1.38	17.38	2.06	-2.68	0.84	-0.59	0.88	-3.27	1.24	-22.49	0.59	-5.47	0.92	-27.96	1.06	-19.09	1.83	5.24	1.59	-13.85	2.42	7.54	0.42	-8.53	0.41	-0.99	0.42	0.15	0.04	0.01	0.01	0.16	0.04	7.69	0.42	-8.52	0.41	-0.83	0.41	-11.4	1.76	-3.28
	104	105	LEU	340	9.53	2.32	11.34	1.21	20.87	2.8	-3.29	1.05	-2.39	0.77	-5.68	1.36	-28.05	0.47	-2.21	0.83	-30.25	0.86	-21.81	2.41	6.75	1.27	-15.06	2.85	4.71	0.28	-6.16	0.42	-1.45	0.43	0.11	0.04	0.01	0.01	0.12	0.05	4.82	0.29	-6.14	0.42	-1.33	0.42	-16.99	2.41	0.6
	105	106	LEU	341	9.18	2.29	11.66	1.4	20.84	2.9	-2.66	0.95	-1.63	0.98	-4.29	1.16	-28.73	0.37	-8.19	0.96	-36.92	1.03	-22.22	2.71	1.85	1.65	-20.37	3.23	4.89	0.26	-5.56	0.4	-0.67	0.43	0.13	0.05	0.02	0.01	0.15	0.05	5.02	0.27	-5.54	0.4	-0.52	0.44	-17.2	2.68	-3.69
	106	107	TYR	342	8.87	2.11	11.24	1.35	20.11	2.57	-2.63	0.61	-3.03	0.86	-5.66	1.03	-19.95	0.52	-10.89	0.79	-30.84	0.93	-13.7	2.25	-2.68	1.48	-16.38	2.75	-2	0.41	-2.12	0.3	-4.12	0.55	0.51	0.05	0	0	0.51	0.05	-1.49	0.38	-2.12	0.3	-3.61	0.53	-15.19	2.21	-4.79
	107	108	MET	343	7.53	2.06	11.29	1.27	18.82	2.45	-6.44	0.63	-3.19	0.71	-9.63	0.99	-2.88	0.34	-7.52	0.89	-10.4	0.93	-1.79	2.15	0.58	1.31	-1.21	2.6	3.06	0.27	-3.93	0.37	-0.86	0.44	0	0	0	0	0	0	3.06	0.27	-3.93	0.37	-0.86	0.44	1.27	2.13	-3.34
	108	109	ALA	344	2.77	0.8	11.29	1.37	14.06	1.71	-1.92	0.37	-3.15	0.94	-5.07	0.99	2.26	0.12	-11.03	1.48	-8.77	1.51	3.11	0.85	-2.88	1.85	0.23	2.2	-0.31	0.04	-0.21	0.39	-0.52	0.4	0.01	0.01	0	0	0.01	0.01	-0.3	0.04	-0.21	0.39	-0.5	0.4	2.81	0.85	-3.09
	109	110	THR	345	6.58	1.6	11.36	1.33	17.94	2.14	-2.79	0.7	-1.74	0.97	-4.53	1.24	-25.21	0.8	-12.07	2.2	-37.28	2.44	-21.43	1.79	-2.45	2.02	-23.87	2.87	2.25	0.45	-4.21	0.66	-1.96	0.7	0.11	0.05	0	0	0.11	0.05	2.36	0.43	-4.21	0.66	-1.85	0.69	-19.06	1.76	-6.66
	110	111	GLN	346	13.43	1.94	11.21	1.2	24.64	2.25	-6.11	0.76	-3.17	0.71	-9.29	1.09	-74.62	1.56	-5.77	1.15	-80.39	1.9	-67.3	2.12	2.27	1.52	-65.03	2.64	1.32	0.65	-2.6	0.45	-1.28	0.77	0.05	0.02	0.01	0.01	0.05	0.02	1.37	0.64	-2.6	0.45	-1.23	0.77	-65.93	2.05	-0.33
	111	112	ILE	347	9.49	2.14	11.14	1.11	20.63	2.57	-3.07	1.05	-1.58	0.97	-4.65	1.54	-7.38	0.3	-4.92	0.94	-12.3	0.91	-0.96	2.23	4.64	1.5	3.68	2.58	5.81	0.24	-6.81	0.43	-0.99	0.36	0	0	0	0	0	0	5.81	0.24	-6.81	0.43	-0.99	0.36	4.85	2.19	-2.16
	112	113	SER	348	3.89	1.02	11.42	1.15	15.31	1.68	-2.95	0.58	-2.81	0.88	-5.76	1.14	-4.03	1.61	-8.01	1.2	-12.04	2.07	-3.09	1.84	0.6	1.5	-2.49	2.41	2.06	1.01	-5.46	0.62	-3.4	1.13	0	0	0	0	0	0	2.06	1.01	-5.46	0.62	-3.4	1.13	-1.03	1.34	-4.86
	113	114	SER	349	3.61	0.91	11.28	1.18	14.9	1.64	-1.81	0.69	-3.17	0.62	-4.98	1	-5.44	1.96	-7	1.11	-12.44	1.92	-3.64	1.94	1.12	1.59	-2.52	2.39	1.37	1.38	-5.03	0.83	-3.66	1.43	0.12	0.03	0	0.01	0.13	0.03	1.49	1.37	-5.03	0.83	-3.53	1.41	-2.14	1.24	-3.91
	114	115	ALA	350	2.77	0.87	10.85	1.29	13.62	1.63	-2.01	0.44	-3.46	0.68	-5.47	0.78	2.3	0.13	-8.65	1.03	-6.35	1.05	3.06	1.02	-1.25	1.49	1.8	1.95	-0.25	0.05	0.42	0.4	0.17	0.41	0	0	0	0	0	0	-0.25	0.05	0.42	0.4	0.17	0.41	2.81	1.02	-0.83
	115	116	MET	351	7.1	1.72	10.73	1.27	17.84	2.13	-6.81	0.64	-2.93	0.68	-9.74	1.01	-3.7	0.29	-9.02	0.83	-12.72	0.83	-3.4	1.75	-1.22	1.42	-4.62	2.33	3.34	0.24	-3.67	0.49	-0.33	0.5	0	0	0	0	0	0	3.34	0.24	-3.67	0.49	-0.33	0.5	-0.06	1.77	-4.9
	116	117	GLU	352	8.03	1.98	11	1.49	19.03	2.67	-3.85	0.98	-2.79	0.88	-6.64	1.42	21.23	10.41	-4.01	1.44	17.23	11.15	25.41	10.58	4.2	2.08	29.61	11.44	-81.1	9.78	-8.22	1.04	-89.32	10.33	0.21	0.06	0	0	0.21	0.06	-80.89	9.74	-8.22	1.04	-89.11	10.28	-55.49	2.13	-4.02
	117	118	TYR	353	8.71	2.11	11.44	1.3	20.16	2.54	-4.01	0.84	-2.63	0.93	-6.64	1.28	-16.6	1.29	-7.64	1.02	-24.25	1.65	-11.9	2.57	1.17	1.6	-10.73	3.02	-4.64	0.87	-0.57	0.53	-5.21	0.98	0.24	0.07	0	0	0.24	0.07	-4.4	0.9	-0.56	0.53	-4.97	1.01	-16.31	2.52	0.61
	118	119	LEU	354	9.08	1.82	12.26	1.37	21.34	2.52	-3.55	0.76	-2.79	0.74	-6.35	1.02	-28.44	0.41	-8.3	1	-36.75	0.98	-22.92	2	1.16	1.39	-21.75	2.56	4.54	0.29	-3.59	0.58	0.95	0.54	0.06	0.02	0	0	0.06	0.02	4.6	0.29	-3.59	0.58	1.01	0.54	-18.31	1.94	-2.43
	119	120	GLU	355	5.79	1.58	11.2	1.25	16.99	2.16	-4.17	0.86	-1.9	0.68	-6.07	1.04	19.91	4.53	-0.13	1.07	19.78	5.06	21.52	4.92	9.18	1.28	30.7	5.42	-76.11	4.29	-8.14	0.88	-84.26	4.84	0.18	0.02	0.07	0.02	0.25	0.03	-75.93	4.28	-8.07	0.88	-84	4.84	-54.41	1.84	1.11
	120	121	LYS	356	11.64	2.54	11.53	1.66	23.18	2.94	-0.76	0.96	-0.8	0.67	-1.56	1.17	-58.23	13.82	0.09	1.49	-58.14	13.91	-47.35	13.53	10.83	1.81	-36.52	13.67	29.43	13.09	-3.2	1.06	26.23	13.02	0.84	0.1	0.24	0.02	1.08	0.09	30.27	13.04	-2.97	1.06	27.31	12.96	-17.07	2.77	7.86
	121	122	LYS	357	12.09	2.4	10.59	1.32	22.68	2.71	-2.69	0.91	-0.21	0.83	-2.9	1.38	-21.35	8.8	-8.45	1.08	-29.8	8.83	-11.95	8.97	1.93	1.42	-10.02	9.01	-5.27	8.56	-4.08	0.66	-9.35	8.69	0.65	0.09	0.13	0.02	0.78	0.09	-4.62	8.49	-3.96	0.66	-8.57	8.62	-16.56	2.58	-2.03
	122	123	ASN	358	11.46	1.8	11.75	1.65	23.21	2.66	-0.06	0.63	-0.45	0.75	-0.52	1.14	-75.24	1.5	-14.04	1.78	-89.29	2.32	-63.85	1.96	-2.75	2.09	-66.6	2.92	-12.23	0.99	-2.16	1.15	-14.4	1.49	0.89	0.05	0.14	0.02	1.02	0.05	-11.35	0.99	-2.03	1.15	-13.37	1.49	-75.19	1.68	-4.78
	123	124	PHE	359	8.12	2.16	10.03	1.12	18.15	2.56	-1.12	0.61	-1.21	0.77	-2.33	1	1.34	0.71	-2.22	0.94	-0.88	1.35	8.34	2.31	6.6	1.37	14.94	2.83	-1.02	0.56	-4.91	0.61	-5.92	0.94	0.38	0.06	0.03	0.01	0.4	0.06	-0.64	0.53	-4.88	0.6	-5.52	0.91	7.7	2.27	1.72
	124	125	ILE	360	9.18	2.09	10.08	1.29	19.25	2.39	-1.88	0.78	0.01	0.84	-1.88	1.31	-6.82	0.49	-0.7	1.27	-7.52	1.22	0.48	1.94	9.39	1.96	9.86	2.77	4.55	0.42	-8.28	0.99	-3.74	0.91	0.32	0.05	0.12	0.02	0.44	0.06	4.87	0.44	-8.17	0.99	-3.3	0.9	5.34	2	1.22
	125	126	HIS	361	24.79	1.64	11.41	1.14	36.19	2	-7.01	0.65	-0.87	0.99	-7.88	1.24	-13.54	1.42	0.12	1.65	-13.42	2.52	4.24	2.05	10.66	1.76	14.9	3.07	-0.52	0.91	-6.67	1.07	-7.18	1.64	0.05	0.01	0.11	0.03	0.16	0.04	-0.47	0.9	-6.55	1.06	-7.02	1.63	3.77	1.74	4.11
	126	127	ARG	362	14.07	2.86	12.11	1.65	26.18	3.4	-2.86	1.01	-1.14	0.59	-3.99	1.18	-205.06	5.37	-12.45	1.38	-217.5	5.4	-193.85	5.77	-1.47	1.67	-195.32	5.99	20.24	5.36	-1.87	1.07	18.37	5.43	0.9	0.13	0.12	0.05	1.02	0.15	21.14	5.33	-1.75	1.05	19.39	5.38	-172.7	2.6	-3.22
	127	128	ASP	363	4.89	1.61	10.03	1.47	14.92	2.39	-1.01	1.34	-0.1	0.84	-1.11	1.68	-3.86	7.34	-8.42	1.44	-12.28	7.74	0.02	7.03	1.51	2.06	1.53	7.73	-60.58	5.67	-9.91	0.87	-70.49	6.18	0.11	0.02	0.02	0.01	0.13	0.02	-60.47	5.67	-9.89	0.87	-70.36	6.18	-60.45	2.23	-8.38
	128	129	LEU	364	8.77	1.89	10.79	1.23	19.57	2.35	-4.34	0.83	-1.69	0.92	-6.03	1.27	-29.1	0.4	0.69	0.83	-28.4	0.89	-24.67	2.04	9.8	1.51	-14.87	2.52	5.2	0.25	-7.3	0.68	-2.1	0.66	0	0	0.02	0.01	0.02	0.01	5.2	0.25	-7.29	0.68	-2.08	0.66	-19.46	2.01	2.51
	129	130	ALA	365	2.43	0.83	9.77	1.15	12.2	1.53	-1.5	0.65	-2.69	0.9	-4.18	1.03	2.55	0.14	-8.31	1.34	-5.76	1.35	3.48	1.15	-1.23	1.74	2.26	2.01	-0.5	0.09	-0.33	0.44	-0.83	0.48	0	0	0	0	0	0	-0.5	0.09	-0.33	0.44	-0.83	0.48	2.98	1.16	-1.56
	130	131	ALA	366	2.92	0.91	11.28	1.49	14.2	2.01	-2.22	0.33	-3.37	0.71	-5.59	0.75	2.1	0.15	-0.79	1.4	1.31	1.38	2.81	0.9	7.12	2.02	9.92	2.45	-0.12	0.06	-0.69	0.48	-0.81	0.47	0	0	0	0	0	0	-0.12	0.06	-0.69	0.48	-0.81	0.47	2.69	0.91	6.42
	131	132	ARG	367	13.8	2.86	10.88	1.39	24.68	3.21	-6.74	1.06	-2.09	0.71	-8.83	1.34	-231.62	5.41	-0.77	0.78	-232.39	5.39	-224.56	5.72	8.02	1.17	-216.54	5.81	49.4	4.22	-6.06	0.49	43.34	4.3	0.09	0.03	0.01	0.01	0.1	0.04	49.49	4.21	-6.05	0.49	43.44	4.29	-175.07	3.48	1.97
	132	133	ASN	368	12.65	2.06	10.41	1.33	23.06	2.41	-3.95	1.02	-1.72	0.86	-5.67	1.43	-83.92	1.96	-14.29	1.06	-98.21	2.08	-75.21	1.91	-5.6	1.54	-80.81	2.36	-2.82	1.24	-0.28	0.36	-3.09	1.27	0	0	0	0	0	0	-2.81	1.24	-0.28	0.36	-3.09	1.27	-78.03	1.51	-5.88
	133	134	CYS	369	3.04	0.97	9.53	1.18	12.57	1.63	-4.24	0.47	-2.25	0.8	-6.49	0.95	6.28	0.37	-7.79	0.84	-1.5	0.92	5.07	1.19	-0.5	1.35	4.57	2.05	-1.67	0.14	0.37	0.29	-1.3	0.32	0	0	0	0	0	0	-1.67	0.14	0.37	0.29	-1.3	0.32	3.41	1.17	-0.13
	134	135	LEU	370	8.46	1.65	9.96	1.21	18.42	2.29	-3.44	0.95	-2.04	0.91	-5.49	1.36	-27.99	0.37	-3.19	0.9	-31.18	0.97	-22.98	2.02	4.73	1.34	-18.24	2.46	4.69	0.24	-4.76	0.46	-0.07	0.42	0.11	0.02	0	0	0.11	0.02	4.8	0.25	-4.76	0.46	0.04	0.42	-18.18	1.99	-0.02
	135	136	VAL	371	6.04	1.46	9.27	1.27	15.31	1.95	-3.62	0.82	-1.95	0.83	-5.56	1.22	-23.61	0.44	-7.48	1	-31.09	1.06	-21.18	1.78	-0.16	1.47	-21.34	2.24	8.02	0.32	-7.93	0.54	0.09	0.48	0	0	0	0	0	0	8.02	0.32	-7.93	0.54	0.09	0.48	-13.16	1.78	-8.09
	136	137	GLY	372	0	0	9.11	1.44	9.11	1.44	0	0	-3.34	0.84	-3.34	0.84	0	0	-9.95	1.61	-9.95	1.61	0	0	-4.17	2.24	-4.17	2.24	0	0	-3.93	1.08	-3.93	1.08	0	0	0.01	0.01	0.01	0.01	0	0	-3.92	1.08	-3.92	1.08	0	0	-8.09
	137	138	GLU	373	6.33	1.88	9.68	1.39	16.02	2.38	-0.45	0.53	-0.68	0.76	-1.12	1.01	38.99	3.64	3.76	1.28	42.75	4.02	44.87	3.88	12.77	1.73	57.64	4.41	-102.58	4.15	-12.66	1.01	-115.24	4.24	0.87	0.07	0.06	0.02	0.93	0.07	-101.71	4.12	-12.6	1.01	-114.31	4.2	-56.84	1.93	0.17
	138	139	ASN	374	11.17	1.76	10.83	1.46	22.01	2.39	-0.07	0.58	-0.1	0.76	-0.18	1.19	-74.85	1.71	-4.2	1.39	-79.05	2.4	-63.75	1.73	6.53	1.86	-57.21	2.74	-12.94	1.25	-4.73	1.18	-17.67	1.84	0.86	0.04	0.15	0.03	1.02	0.06	-12.08	1.24	-4.58	1.18	-16.66	1.83	-75.82	1.42	1.95
	139	140	HIS	375	24.96	1.67	11.1	1.34	36.06	2.18	-4.54	0.69	-1.64	0.71	-6.19	1.15	-11.92	2.34	-4.66	0.97	-16.58	2.6	8.49	2.84	4.8	1.34	13.29	3.22	-2.51	1.66	-5.4	0.58	-7.9	1.89	0.24	0.09	0.02	0.01	0.26	0.09	-2.27	1.63	-5.37	0.58	-7.65	1.85	6.22	1.9	-0.58
	140	141	LEU	376	9.31	1.86	10.33	1.22	19.64	2.45	-2.05	0.9	-1.33	0.92	-3.39	1.4	-28.5	0.34	-2.72	1.12	-31.23	1.09	-21.24	1.89	6.27	1.41	-14.97	2.6	4.68	0.26	-6.03	0.61	-1.35	0.6	0.41	0.05	0	0	0.41	0.05	5.09	0.25	-6.03	0.61	-0.94	0.59	-16.16	1.92	0.24
	141	142	VAL	377	6.21	1.58	10.06	1.19	16.28	2.01	-3.63	0.8	-1.71	0.9	-5.34	1.27	-22.83	0.42	-2.13	1.09	-24.96	1.13	-20.25	1.79	6.23	1.52	-14.02	2.32	7.48	0.31	-7.53	0.45	-0.05	0.38	0	0	0	0	0	0	7.48	0.31	-7.53	0.45	-0.05	0.38	-12.76	1.75	-1.31
	142	143	LYS	378	10.86	2.32	9.9	1.21	20.76	2.82	-5.12	1.11	-2.27	0.89	-7.38	1.34	-72.1	5.04	-7.41	0.77	-79.51	5.21	-66.36	5.38	0.23	1.23	-66.13	5.47	45.38	4.51	-2.28	0.28	43.1	4.44	0.14	0.04	0	0	0.14	0.04	45.52	4.51	-2.28	0.28	43.24	4.43	-20.84	2.86	-2.05
	143	144	VAL	379	5.83	1.45	9.61	1.19	15.44	1.97	-3.11	0.65	-1.44	0.73	-4.55	1	-22.28	0.37	-12.25	0.83	-34.53	0.88	-19.56	1.61	-4.07	1.71	-23.63	2.32	6.99	0.27	-6.88	0.45	0.11	0.36	0.01	0.01	0	0	0.01	0.01	7	0.27	-6.88	0.45	0.12	0.36	-12.56	1.55	-10.95
	144	145	ALA	380	2.27	0.79	9.74	1.33	12.02	1.71	-1.6	0.47	-1.48	0.8	-3.08	0.97	2.29	0.11	-7.99	1.06	-5.69	1.09	2.97	0.93	0.27	1.7	3.24	2.16	-0.34	0.06	-1.95	0.53	-2.29	0.56	0	0	0.02	0.01	0.03	0.02	-0.33	0.06	-1.93	0.53	-2.26	0.56	2.64	0.93	-1.66
	145	146	ASP	381	4.4	1.56	9.74	1.23	14.14	1.86	-2.03	0.57	-0.93	0.56	-2.97	0.93	38.88	4.74	1.74	1.13	40.62	5.18	41.25	5.13	10.54	1.49	51.79	5.49	-98.9	4.74	-11.98	0.77	-110.88	5.08	0.35	0.04	0.13	0.02	0.48	0.04	-98.55	4.73	-11.85	0.77	-110.4	5.08	-57.3	1.58	-1.31
	146	147	PHE	382	8.38	1.86	9.79	1.33	18.17	2.34	-3.05	0.74	-0.69	0.66	-3.74	1.02	-0.03	0.39	-7.18	1.65	-7.21	1.73	5.3	1.93	1.92	1.72	7.21	2.57	0.48	0.29	-0.81	1.2	-0.33	1.22	0.1	0.02	0.04	0.03	0.14	0.04	0.58	0.28	-0.77	1.18	-0.19	1.2	5.87	1.97	1.15
	147	148	GLY	383	0	0	9.68	1.53	9.68	1.53	0	0	-2.04	0.63	-2.04	0.63	0	0	-10.21	3.75	-10.21	3.75	0	0	-2.57	4.06	-2.57	4.06	0	0	1.3	2.32	1.3	2.32	0	0	0.17	0.06	0.17	0.06	0	0	1.47	2.29	1.47	2.29	0	0	-1.09
	148	149	LEU	384	8.87	1.87	11.28	1.36	20.15	2.48	-3.77	0.96	-1.4	0.79	-5.17	1.14	-27.42	0.49	-7.98	1.37	-35.4	1.42	-22.31	2.18	1.9	1.73	-20.42	3.06	3.96	0.41	-2.06	0.73	1.9	0.78	0.01	0.01	0	0	0.01	0.01	3.98	0.41	-2.06	0.73	1.92	0.78	-18.34	2.14	-0.16
	149	150	SER	385	3.69	0.96	10.75	1.36	14.45	1.66	-1.55	0.41	-1.36	0.82	-2.91	1.05	-3.89	1.58	-7.32	2.25	-11.21	2.62	-1.74	1.74	2.07	2.49	0.32	2.91	-0.12	1.53	0.12	1.66	-0.01	2.03	0.26	0.04	0	0	0.27	0.04	0.14	1.52	0.12	1.66	0.26	2.02	-1.6	1.28	2.19
	150	151	ARG	386	12.72	3.03	10	1.49	22.72	3.38	-0.79	1.45	0.35	0.65	-0.45	1.57	-224.17	8.04	-2.35	1.39	-226.52	8.31	-212.24	8.01	7.99	1.7	-204.25	8.48	31.73	6.6	-4.68	0.92	27.05	6.81	0.71	0.12	0.18	0.03	0.89	0.13	32.44	6.56	-4.49	0.91	27.95	6.77	-179.8	3.41	3.5
	151	152	LEU	387	8.57	1.85	11.39	1.25	19.96	2.44	-1.31	1.09	0.04	0.86	-1.26	1.58	-26.45	0.47	-5.16	1.31	-31.61	1.25	-19.19	2	6.27	1.5	-12.91	2.54	2.52	0.37	-7.1	0.88	-4.58	0.81	0.38	0.08	0.18	0.02	0.56	0.08	2.9	0.36	-6.92	0.87	-4.02	0.8	-16.29	1.99	-0.65
	152	153	MET	388	7.1	1.7	10.93	1.46	18.03	2.28	-4.3	0.76	-1.28	0.79	-5.58	1.25	-2.33	1.32	-11.62	1.52	-13.95	2.31	0.48	1.94	-1.97	2.05	-1.49	2.95	1.83	1.13	-3.97	0.64	-2.13	1.46	0.27	0.08	0.03	0.02	0.3	0.08	2.1	1.12	-3.94	0.65	-1.83	1.45	2.58	1.62	-5.91
	153	154	THR	389	6.49	1.43	9.53	1.39	16.02	2.33	-1.08	0.69	0.27	0.76	-0.81	1.07	-25.21	3.22	-5.14	1.54	-30.36	3.55	-19.8	3.02	4.66	1.82	-15.14	3.77	0.52	2.47	-9.17	1.11	-8.65	2.78	0.43	0.07	0.16	0.03	0.59	0.07	0.95	2.47	-9.01	1.11	-8.06	2.78	-18.85	1.53	-4.35
	154	155	GLY	390	0	0	9.95	1.87	9.95	1.87	0	0	-0.93	0.8	-0.93	0.8	0	0	-7.43	1.43	-7.43	1.43	0	0	1.6	2	1.6	2	0	0	-6.84	1.36	-6.84	1.36	0	0	0.43	0.08	0.43	0.08	0	0	-6.41	1.3	-6.41	1.3	0	0	-4.81
	155	156	ASP	391	4.02	1.14	11.43	1.32	15.45	1.8	-1.24	0.64	-0.22	0.74	-1.45	0.95	23.28	6.14	0.31	1.57	23.59	6.91	26.06	6.17	11.53	1.95	37.58	7.13	-87.82	6.3	-13.42	1.33	-101.24	7.1	0.57	0.08	0.22	0.07	0.79	0.09	-87.24	6.25	-13.2	1.3	-100.45	7.04	-61.19	1.3	-1.68
	156	157	THR	392	6.28	1.4	11.19	1.19	17.47	2.11	-2.21	0.81	-1.11	0.8	-3.32	1.37	-25.05	2.91	-8.76	1.22	-33.81	3.28	-20.98	3.03	1.32	1.52	-19.66	3.53	0.89	1.7	-4.84	0.72	-3.95	1.94	0.15	0.08	0.04	0.02	0.19	0.09	1.04	1.69	-4.8	0.71	-3.76	1.93	-19.94	2	-3.48
	157	158	TYR	393	8.54	1.89	10.14	1.26	18.68	2.47	-5.02	1.14	-2.04	1.12	-7.06	1.7	-26.48	1.45	-8.53	1.7	-35.01	2.41	-22.97	2.36	-0.42	1.95	-23.39	3.12	1.25	0.71	-1.39	1.34	-0.13	1.72	0.02	0.01	0	0	0.03	0.01	1.28	0.71	-1.38	1.34	-0.11	1.73	-21.69	2.3	-1.81
	158	159	THR	394	6.93	1.37	10.66	1.28	17.59	1.9	-2.13	0.55	-1.23	0.85	-3.36	1.04	-22.02	1.38	-11.54	1.24	-33.55	1.83	-17.21	1.87	-2.1	1.59	-19.31	2.47	-0.82	1.03	-3.23	0.6	-4.05	1.06	0.2	0.07	0.01	0.01	0.21	0.07	-0.62	1.02	-3.22	0.6	-3.84	1.03	-17.83	1.47	-5.33
	159	160	ALA	395	2.77	0.87	10.29	1.28	13.06	1.72	-0.58	0.23	-0.89	0.6	-1.47	0.66	2.3	0.12	0.85	0.92	3.15	0.95	4.48	0.89	10.25	1.56	14.74	1.98	-0.27	0.06	-6.95	0.66	-7.22	0.68	0.43	0.05	0.19	0.03	0.62	0.05	0.17	0.1	-6.77	0.66	-6.6	0.67	4.65	0.91	3.49
	160	161	HIS	396	24.6	1.69	9.9	1.26	34.51	2.21	-5.2	0.86	-0.85	0.85	-6.05	1.31	-12.37	1.41	-7.14	1.14	-19.5	2.05	7.03	1.96	1.92	1.58	8.95	2.65	-2.97	1.03	-3.48	0.72	-6.45	1.34	0.25	0.1	0.05	0.01	0.3	0.1	-2.72	0.97	-3.42	0.72	-6.15	1.29	4.31	1.72	-1.51
	161	162	ALA	397	2.55	0.91	10.47	1.49	13.01	1.91	-0.38	0.37	-0.02	0.54	-0.4	0.79	2	0.11	-2	1.14	0	1.12	4.16	1.02	8.44	1.83	12.61	2.3	0.17	0.06	-7.39	0.83	-7.22	0.83	0.23	0.08	0.4	0.05	0.63	0.1	0.4	0.07	-6.99	0.81	-6.59	0.77	4.57	1.03	1.45
	162	163	GLY	398	0	0	9.63	1.85	9.63	1.85	0	0	0.14	0.64	0.14	0.64	0	0	-6.55	0.92	-6.55	0.92	0	0	3.22	1.69	3.22	1.69	0	0	-6.81	0.58	-6.81	0.58	0	0	0.68	0.04	0.68	0.04	0	0	-6.13	0.58	-6.13	0.58	0	0	-2.91
	163	164	ALA	399	2.46	0.84	9.82	1.46	12.29	1.84	-0.66	0.4	0.22	1.08	-0.44	1.15	2.17	0.12	0.22	1.25	2.39	1.25	3.97	0.93	10.26	1.91	14.23	2.32	0.03	0.09	-3.01	0.74	-2.98	0.76	0.17	0.07	0.11	0.03	0.28	0.08	0.2	0.09	-2.9	0.75	-2.69	0.75	4.18	0.94	7.36
	164	165	LYS	400	11.04	2.15	10.36	1.46	21.4	2.87	-2.54	1	-0.96	0.77	-3.5	1.39	-19.4	5.48	-3.17	1.28	-22.56	5.12	-10.9	6.4	6.24	1.66	-4.66	6.41	-6.14	5.07	-3.94	1.24	-10.08	4.82	0.54	0.1	0.13	0.04	0.67	0.09	-5.6	5.03	-3.81	1.21	-9.41	4.79	-16.5	2.45	2.43
	165	166	PHE	401	8.06	2.06	11.54	1.5	19.6	2.63	-3.5	0.7	-1.35	0.72	-4.85	0.98	0.85	0.47	-4.75	1.4	-3.91	1.54	5.41	2.25	5.44	1.93	10.85	3.05	-0.23	0.36	-0.69	0.69	-0.92	0.83	0.06	0.05	0.01	0.01	0.07	0.05	-0.17	0.34	-0.68	0.69	-0.85	0.83	5.24	2.16	4.76
	166	167	PRO	402	12.93	1.34	15.08	1.31	28.01	2.18	-3.34	0.73	-1.9	1.01	-5.24	1.35	-7.9	0.87	-2.62	1.61	-10.52	1.35	1.69	1.77	10.56	2.09	12.25	2.68	7.49	0.78	-8.72	0.78	-1.24	0.36	0.07	0.02	0	0	0.07	0.02	7.56	0.78	-8.72	0.78	-1.16	0.36	9.25	1.53	1.84
	167	168	ILE	403	9.58	1.93	12.64	1.35	22.22	2.51	-3.09	1.08	-1.91	0.84	-5	1.44	-5.88	0.41	2.58	0.97	-3.3	1.01	0.61	1.96	13.31	1.4	13.92	2.47	3.76	0.33	-7.85	0.64	-4.09	0.59	0.06	0.03	0	0.01	0.06	0.03	3.82	0.33	-7.85	0.64	-4.03	0.59	4.42	1.95	5.46
	168	169	LYS	404	11.75	2.31	10.54	1.57	22.29	3.18	-3.59	0.95	-1.88	0.75	-5.47	1.25	-51.84	8.45	-3.19	0.88	-55.03	8.67	-43.67	8.18	5.47	1.47	-38.21	8.31	26.69	7.97	-4.76	0.54	21.93	8.12	0.26	0.07	0	0	0.26	0.07	26.94	7.93	-4.75	0.54	22.19	8.08	-16.73	2.61	0.71
	169	170	TRP	405	11.32	2.28	10.31	1.48	21.63	2.57	-7.62	1.12	-1.93	0.79	-9.54	1.31	-2.89	1.97	-9.86	1.01	-12.75	2.36	0.81	2.69	-1.47	1.42	-0.66	3.23	3.76	0.65	-4.48	0.68	-0.72	0.85	0.13	0.06	0.01	0.01	0.13	0.06	3.89	0.63	-4.48	0.68	-0.59	0.82	4.7	2.58	-5.95
	170	171	THR	406	6.33	1.48	10.34	1.25	16.66	2.08	-2.64	0.95	-1.99	0.7	-4.63	1.36	-25.16	1.18	-7.77	1.01	-32.93	1.79	-21.47	1.78	0.57	1.5	-20.9	2.41	2.54	0.67	-6.07	0.76	-3.53	1.04	0.03	0.02	0.03	0.02	0.07	0.03	2.58	0.66	-6.04	0.75	-3.46	1.03	-18.89	1.67	-5.47
	171	172	ALA	407	2.61	0.78	11.54	1.41	14.15	1.76	-2.24	0.45	-2.26	0.68	-4.51	0.79	2.38	0.11	1.59	1.05	3.97	1.09	2.75	0.88	10.87	1.63	13.62	2.01	-0.19	0.07	-0.69	0.39	-0.88	0.41	0	0	0.01	0.01	0.01	0.01	-0.19	0.07	-0.68	0.4	-0.87	0.41	2.56	0.87	10.19
	172	173	PRO	408	12.46	1.52	14.34	1.3	26.79	2.04	-4.14	0.61	-2.69	0.78	-6.82	0.95	-10.86	0.9	-0.71	1.3	-11.56	1.05	-2.53	1.94	10.94	1.76	8.41	2.2	10.04	0.86	-11.21	0.96	-1.17	0.63	0.03	0.02	0.01	0.01	0.04	0.02	10.06	0.86	-11.2	0.96	-1.14	0.63	7.53	1.62	-0.26
	173	174	GLU	409	7.99	1.59	10.98	1.53	18.98	2.37	-1.86	1.35	-2.04	0.97	-3.9	1.8	-22.75	5.12	-9.42	1.31	-32.18	5.7	-16.62	4.94	-0.49	2.1	-17.11	5.97	-42.08	4.13	-4.44	0.8	-46.52	4.48	0.11	0.04	0.01	0.01	0.12	0.05	-41.97	4.11	-4.42	0.79	-46.39	4.45	-58.59	1.79	-4.91
	174	175	SER	410	3.84	1.02	11.23	1.41	15.07	1.98	-2.3	0.71	-2.64	0.77	-4.94	1.05	-5.87	0.96	-6.66	1.12	-12.53	1.36	-4.33	1.38	1.93	1.6	-2.4	2.42	0.83	0.38	-2.96	0.67	-2.13	0.64	0.01	0.01	0	0	0.01	0.01	0.83	0.38	-2.95	0.67	-2.12	0.64	-3.5	1.35	-1.03
	175	176	LEU	411	9.07	2.11	11.38	1.45	20.45	2.71	-4.41	0.92	-1.73	0.8	-6.14	1.34	-27.07	0.45	-3.94	1.35	-31.01	1.55	-22.42	2.29	5.71	2.07	-16.7	3.28	3.59	0.3	-5.76	0.72	-2.17	0.8	0.01	0.01	0.02	0.02	0.03	0.02	3.59	0.29	-5.74	0.72	-2.14	0.8	-18.82	2.27	-0.03
	176	177	ALA	412	2.61	0.74	11.63	1.46	14.24	1.71	-1.34	0.32	-1.18	0.73	-2.52	0.78	2.24	0.13	-6.63	1.11	-4.39	1.14	3.51	0.84	3.82	1.77	7.33	2.06	-0.07	0.08	-4.51	0.6	-4.59	0.64	0.09	0.04	0.2	0.04	0.3	0.05	0.02	0.08	-4.31	0.59	-4.29	0.63	3.53	0.83	-0.49
	177	178	TYR	413	8.9	1.99	9.87	1.29	18.77	2.44	0.77	0.74	0.11	0.79	0.88	1.17	-16.5	0.83	-5.63	0.96	-22.14	1.33	-6.83	2.42	4.35	1.44	-2.48	2.87	-6.29	0.81	-3.7	0.92	-9.99	1.19	1.05	0.09	0.19	0.03	1.24	0.09	-5.24	0.78	-3.5	0.9	-8.74	1.16	-12.07	2.16	0.84
	178	179	ASN	414	11.88	1.93	10.3	1.3	22.19	2.54	-1.05	0.61	-0.71	0.74	-1.76	1.09	-77.05	1.36	-2.93	1.51	-79.98	1.83	-66.22	1.95	6.67	2.02	-59.55	2.54	-9.26	1.14	-2.39	1.21	-11.64	1.39	0.58	0.08	0.11	0.02	0.69	0.08	-8.67	1.09	-2.28	1.2	-10.95	1.37	-74.89	1.63	4.39
	179	180	LYS	415	11.04	2.23	9.72	1.18	20.76	2.55	-1.66	0.79	-0.79	0.87	-2.45	1.23	-10.76	3.04	-3.96	1.39	-14.72	3.73	-1.37	3.87	4.97	1.69	3.6	4.4	-16.13	2.75	-4.63	0.75	-20.76	3.05	1	0.09	0.03	0.01	1.03	0.09	-15.13	2.76	-4.6	0.75	-19.73	3.05	-16.5	2.49	0.37
	180	181	PHE	416	7.86	1.97	9.9	1.26	17.76	2.5	-2.13	0.97	-1.1	0.57	-3.23	1.15	-0.13	0.62	-11.19	1.22	-11.32	1.32	5.6	2.24	-2.39	1.7	3.21	2.94	0.01	0.43	-2.96	0.95	-2.95	0.95	0.3	0.12	0.18	0.03	0.49	0.13	0.31	0.37	-2.78	0.93	-2.47	0.9	5.91	2.17	-5.17
	181	182	SER	417	3.11	0.94	9.81	1.23	12.92	1.73	-1.18	0.58	-0.39	1.05	-1.56	1.23	-1.74	1.54	-4.3	1.3	-6.04	2.2	0.19	1.69	5.12	1.81	5.31	2.75	-2.85	1.23	-5	0.64	-7.85	1.52	0.29	0.05	0.04	0.02	0.33	0.05	-2.56	1.24	-4.96	0.64	-7.52	1.52	-2.37	1.14	0.16
	182	183	ILE	418	9.6	2.14	11.25	1.34	20.84	2.61	-3.32	0.86	-0.68	0.91	-4	1.35	-6.35	0.49	4.32	1.21	-2.04	1.31	-0.08	2.17	14.89	1.43	14.81	2.65	4.36	0.45	-8.25	0.58	-3.89	0.66	0.21	0.04	0.03	0.01	0.24	0.04	4.57	0.45	-8.22	0.58	-3.66	0.65	4.49	2.15	6.67
	183	184	LYS	419	11.48	2.66	10.84	1.35	22.32	3.31	-4.53	0.91	-1.62	0.83	-6.16	1.37	-61.29	6.78	-9.11	1.16	-70.4	6.94	-54.34	6.71	0.11	1.52	-54.23	7.05	37.4	6.25	-3.75	0.54	33.65	6.38	0.33	0.05	0	0	0.33	0.05	37.73	6.24	-3.75	0.54	33.98	6.36	-16.61	3.51	-3.64
	184	185	SER	420	3.63	0.87	11.23	1.51	14.86	1.85	-1.88	0.98	-2.72	0.76	-4.6	1.42	-11.75	1.62	-13.82	1.06	-25.57	1.81	-10	1.5	-5.31	1.43	-15.3	2.01	3.98	0.42	-4.83	0.66	-0.85	0.64	0.02	0.01	0.02	0.01	0.03	0.02	4	0.42	-4.81	0.66	-0.82	0.64	-6	1.32	-10.12
	185	186	ASP	421	4.57	1.33	10.93	1.25	15.51	1.92	-4.7	0.79	-2.13	0.79	-6.83	1.08	9.34	3.26	-0.52	1	8.83	3.73	9.21	3.24	8.29	1.56	17.5	3.78	-66.21	2.89	-10.05	0.48	-76.27	3.17	0.02	0.01	0	0	0.02	0.01	-66.2	2.89	-10.05	0.48	-76.25	3.17	-56.99	1.36	-1.76
	186	187	VAL	422	6.18	1.56	11.36	1.47	17.54	2.25	-3.63	0.79	-1.79	0.7	-5.43	1.07	-21.49	0.45	-5.46	1.05	-26.94	1.14	-18.94	1.75	4.11	1.61	-14.83	2.14	6.59	0.31	-8.27	0.45	-1.68	0.41	0	0	0	0	0	0	6.59	0.31	-8.27	0.45	-1.68	0.41	-12.34	1.73	-4.17
	187	188	TRP	423	11.66	2.45	11.22	1.58	22.88	2.95	-10.64	0.63	-3.54	0.71	-14.18	0.89	6.04	0.65	-9.49	0.95	-3.45	1.09	7.06	2.65	-1.81	1.73	5.25	3.13	0.19	0.42	-2.97	0.5	-2.78	0.57	0	0	0	0	0	0	0.19	0.42	-2.97	0.5	-2.78	0.57	7.25	2.6	-4.78
	188	189	ALA	424	2.7	0.77	11.15	1.25	13.85	1.59	-1.88	0.37	-3.26	0.88	-5.15	0.95	2.04	0.13	-9.21	1.03	-7.17	1.06	2.85	0.81	-1.32	1.34	1.54	1.63	-0.08	0.07	-0.63	0.52	-0.71	0.55	0.04	0.01	0	0	0.05	0.02	-0.03	0.07	-0.63	0.52	-0.66	0.54	2.82	0.82	-1.95
	189	190	PHE	425	7.85	1.84	10.22	1.23	18.07	2.25	-4.96	0.65	-2.37	0.87	-7.33	1.12	0.31	0.25	-8.54	0.94	-8.22	1.06	3.2	2.02	-0.68	1.31	2.52	2.51	0.48	0.18	-2.17	0.28	-1.69	0.35	0	0	0	0	0	0	0.48	0.18	-2.17	0.28	-1.69	0.35	3.68	2.03	-2.84
	190	191	GLY	426	0	0	9.39	1.32	9.39	1.32	0	0	-5.2	0.69	-5.2	0.69	0	0	-8.01	1.05	-8.01	1.05	0	0	-3.83	1.51	-3.83	1.51	0	0	-1.03	0.46	-1.03	0.46	0	0	0	0	0	0	0	0	-1.03	0.46	-1.03	0.46	0	0	-4.85
	191	192	VAL	427	6.45	1.79	11	1.22	17.46	2.28	-3.73	0.68	-1.79	0.89	-5.52	1.21	-21.56	0.39	-6.25	1.19	-27.82	1.2	-18.84	1.89	2.96	1.5	-15.88	2.51	6.41	0.31	-7.25	0.51	-0.84	0.45	0	0	0	0	0	0	6.41	0.31	-7.25	0.51	-0.84	0.45	-12.43	1.87	-4.29
	192	193	LEU	428	9.73	1.99	12.01	1.31	21.74	2.37	-3.93	0.95	-2.02	0.84	-5.96	1.34	-28.82	0.38	-3.35	0.94	-32.17	1.02	-23.02	2.2	6.63	1.51	-16.39	2.49	4.92	0.23	-5.64	0.39	-0.71	0.4	0	0	0	0	0	0	4.93	0.23	-5.64	0.39	-0.71	0.4	-18.09	2.17	0.99
	193	194	LEU	429	9.04	2.02	11.39	1.34	20.43	2.57	-4.01	0.91	-2.27	0.78	-6.28	1.29	-27.97	0.38	-4.84	0.93	-32.8	1.03	-22.94	2.35	4.28	1.48	-18.66	2.76	4.45	0.23	-5.55	0.47	-1.1	0.46	0.01	0.01	0.01	0.01	0.02	0.01	4.46	0.23	-5.54	0.46	-1.08	0.46	-18.48	2.34	-1.26
	194	195	TRP	430	10.93	2.28	10.97	1.26	21.91	2.51	-9.63	0.81	-2.9	0.93	-12.53	1.32	4.47	1.11	-13.64	1.06	-9.16	1.42	5.78	2.71	-5.57	1.65	0.21	3.16	1.16	0.48	-2.55	0.34	-1.39	0.66	0.08	0.03	0	0	0.08	0.03	1.24	0.47	-2.55	0.34	-1.31	0.64	7.02	2.56	-8.12
	195	196	GLU	431	6.69	1.93	11.21	1.26	17.89	2.4	-5.64	0.83	-3	0.79	-8.64	1.26	13.86	3.64	-2.99	1.18	10.88	4	14.91	3.92	5.22	1.69	20.13	4.5	-68.34	3.33	-8.82	0.6	-77.16	3.59	0	0	0	0	0.01	0.01	-68.33	3.33	-8.82	0.6	-77.15	3.59	-53.42	1.92	-3.6
	196	197	ILE	432	9.75	2.14	12.1	1.39	21.85	2.58	-3.26	1.06	-1.23	0.86	-4.49	1.44	-7.66	0.28	-3.59	1.05	-11.25	1.01	-1.17	2.13	7.28	1.68	6.1	2.65	5.89	0.24	-7.94	0.66	-2.05	0.55	0.03	0.01	0	0	0.03	0.01	5.92	0.25	-7.94	0.66	-2.02	0.55	4.75	2.13	-0.67
	197	198	ALA	433	2.92	0.87	10.89	1.43	13.81	1.77	-1.64	0.36	-2.47	0.71	-4.12	0.8	2.45	0.13	-6.5	0.86	-4.06	0.88	3.72	0.98	1.91	1.26	5.63	1.62	-0.41	0.07	-3.33	0.49	-3.74	0.52	0.03	0.02	0.04	0.03	0.08	0.03	-0.37	0.07	-3.29	0.48	-3.66	0.53	3.35	0.97	-1.38
	198	199	THR	434	6.61	1.51	9.74	1.48	16.34	2.17	-2.58	0.8	-0.4	0.84	-2.97	1.26	-28.15	1.02	-9.59	1.06	-37.74	1.45	-24.13	1.69	-0.25	1.77	-24.37	2.27	2.82	0.33	-5.19	0.71	-2.37	0.69	0.07	0.03	0.1	0.04	0.17	0.06	2.89	0.32	-5.09	0.69	-2.2	0.66	-21.24	1.64	-5.34
	199	200	TYR	435	8.72	2.04	9.28	1.38	18	2.47	-3.16	0.82	-2.02	0.77	-5.18	1.18	-18.77	0.9	-4.1	1.11	-22.87	1.21	-13.22	2.38	3.16	1.66	-10.06	3.02	-2.15	0.78	-4.28	0.88	-6.43	0.98	0.23	0.06	0.03	0.01	0.26	0.07	-1.92	0.75	-4.25	0.88	-6.17	0.96	-15.14	2.27	-1.09
	200	201	GLY	436	0	0	10.68	1.49	10.68	1.49	0	0	-2.39	1.17	-2.39	1.17	0	0	-16.03	2.2	-16.03	2.2	0	0	-7.74	2.22	-7.74	2.22	0	0	1.41	1.02	1.41	1.02	0	0	0.02	0.02	0.02	0.02	0	0	1.43	1.01	1.43	1.01	0	0	-6.31
	201	202	MET	437	6.91	1.67	9.6	1.21	16.51	2.13	-2.63	0.58	-1.37	0.87	-4.01	1.13	-2.43	0.94	-0.82	0.93	-3.25	1.44	1.84	1.74	7.41	1.58	9.25	2.52	1.47	0.68	-8.14	0.55	-6.67	0.94	0.75	0.09	0.04	0.02	0.79	0.08	2.22	0.7	-8.1	0.54	-5.88	0.95	4.07	1.61	-0.69
	202	203	SER	438	3.74	1.08	11.39	1.22	15.13	1.77	-1.2	0.36	-0.27	0.71	-1.47	0.86	-2.18	1.19	4.76	1.34	2.58	2.09	0.36	1.72	15.88	1.6	16.24	2.73	-2.26	1.02	-6.89	1.04	-9.15	1.63	0.35	0.07	0.04	0.02	0.39	0.08	-1.91	1	-6.85	1.03	-8.76	1.59	-1.55	1.34	9.03
	203	204	PRO	439	12.27	1.64	13.15	1.29	25.42	2.24	-4.08	0.64	-2.35	0.91	-6.43	1.14	-11.44	0.95	0.32	2.84	-11.13	2.52	-3.26	1.85	11.12	2.74	7.86	3.33	10.66	0.86	-9.9	1.83	0.75	1.42	0	0	0	0	0	0.01	10.66	0.86	-9.9	1.83	0.76	1.42	7.4	1.76	1.22
	204	205	TYR	440	8.58	2.69	12.69	1.33	21.27	3.18	-4.25	0.82	-0.69	0.82	-4.94	1.15	-17.67	0.7	2.39	2.15	-15.27	2.16	-13.34	2.75	14.39	2.27	1.05	3.58	-1.59	0.44	-3.48	1.66	-5.06	1.68	0.01	0.01	0.01	0.01	0.01	0.01	-1.58	0.44	-3.47	1.65	-5.05	1.67	-14.93	2.84	10.92
	205	206	PRO	441	11.68	1.15	11.97	1.07	23.65	1.55	-1.64	0.55	-0.43	0.63	-2.07	0.86	-11.02	1.05	8.06	1.78	-2.97	1.32	-0.98	1.7	19.6	1.95	18.61	2.02	10.33	0.98	-16.16	1.45	-5.83	1.05	0.36	0.08	0.09	0.02	0.44	0.08	10.69	0.95	-16.07	1.44	-5.38	1.05	9.71	1.31	3.52
	206	207	GLY	442	0	0	9.87	1.54	9.87	1.54	0	0	-0.53	0.43	-0.53	0.43	0	0	-5.15	0.7	-5.15	0.7	0	0	4.18	1.48	4.18	1.48	0	0	-7.39	0.47	-7.39	0.47	0	0	0.69	0.02	0.69	0.02	0	0	-6.7	0.47	-6.7	0.47	0	0	-2.52
	207	208	ILE	443	9.14	1.89	9.57	1.2	18.71	2.38	-2.68	0.96	0.97	0.8	-1.71	1.5	-7.84	0.46	-5.84	1.2	-13.68	1.17	-1.38	2.15	4.69	1.73	3.32	2.99	5.56	0.4	-7.23	1.08	-1.66	1.03	0.14	0.05	0.11	0.04	0.25	0.05	5.7	0.41	-7.11	1.06	-1.41	1	4.32	2.15	-2.42
	208	209	ASP	444	4.39	1.44	9.91	1.34	14.3	2.13	-0.25	1.08	-0.89	0.76	-1.14	1.25	11.57	3.77	-0.04	1.48	11.53	4.42	15.71	3.49	8.98	1.96	24.69	4.49	-79.23	3.41	-10.69	0.98	-89.92	3.88	0.52	0.03	0.07	0.02	0.6	0.04	-78.71	3.41	-10.62	0.97	-89.32	3.87	-63	1.45	-1.63
	209	210	LEU	445	9.11	1.98	11.26	1.41	20.37	2.47	-0.24	0.94	-0.64	0.69	-0.88	1.33	-27.27	0.55	-2.2	0.91	-29.47	1.13	-18.41	2.36	8.42	1.49	-9.98	2.95	3.31	0.36	-6.43	0.72	-3.11	0.81	0.51	0.1	0.06	0.03	0.57	0.11	3.82	0.34	-6.37	0.7	-2.54	0.78	-14.58	2.37	2.06
	210	211	SER	446	3.5	0.94	9.87	1.26	13.37	1.58	0.34	0.86	0.18	0.68	0.52	1.26	-8.83	1.32	-7.12	1.32	-15.95	2.06	-4.99	1.29	2.93	1.53	-2.06	2.12	0.99	0.6	-7.95	0.99	-6.97	1.16	0.45	0.03	0.23	0.04	0.68	0.04	1.44	0.58	-7.72	1	-6.29	1.16	-3.55	1.08	-4.8
	211	212	GLN	447	13.65	2.02	10.36	1.35	24.01	2.38	-2.47	0.83	-0.72	0.88	-3.18	1.33	-68.98	2.39	-4.71	1.24	-73.69	2.75	-57.8	2.61	4.93	1.63	-52.86	3.05	-5.62	1.35	-3.54	0.64	-9.15	1.51	0.55	0.06	0	0.01	0.55	0.06	-5.07	1.31	-3.54	0.64	-8.6	1.48	-62.86	2.01	1.39
	212	213	VAL	448	6.68	1.73	11.97	1.55	18.65	2.38	-2.64	0.83	-0.86	0.98	-3.49	1.39	-20.69	0.54	-5.57	1.18	-26.26	1.23	-16.65	1.78	5.55	1.87	-11.1	2.52	5.82	0.4	-8.42	0.62	-2.6	0.59	0	0.01	0	0	0.01	0.01	5.83	0.4	-8.42	0.62	-2.59	0.59	-10.83	1.82	-2.86
	213	214	TYR	449	8.79	2.07	11.12	1.55	19.91	2.69	-2.05	0.89	-1.82	0.84	-3.87	1.36	-18.17	2.83	-6.47	1.45	-24.64	3.79	-11.43	3.69	2.82	1.7	-8.6	4.43	-3.41	2.16	-5.77	1.33	-9.18	3.13	0.48	0.15	0.02	0.02	0.5	0.16	-2.94	2.06	-5.75	1.32	-8.69	3.02	-14.36	2.47	-2.93
	214	215	GLU	450	6.22	1.73	10.9	1.34	17.12	2.43	-1.77	0.75	-1.42	0.96	-3.2	1.27	32.88	8.14	-1.85	3.21	31.03	9.19	37.33	8.36	7.62	3.13	44.95	9.58	-95.59	7.89	-8.05	2.17	-103.64	8.8	0.61	0.08	0.02	0.02	0.62	0.09	-94.99	7.83	-8.03	2.17	-103.02	8.74	-57.66	1.76	-0.41
	215	216	LEU	451	8.9	2.09	11.45	1.55	20.35	2.83	-2.07	0.82	-1.66	0.88	-3.73	1.26	-28.29	0.49	-1.1	1.11	-29.38	1.12	-21.46	2.35	8.7	1.77	-12.76	2.83	4.42	0.3	-6.48	0.57	-2.05	0.55	0.29	0.04	0	0	0.29	0.04	4.71	0.31	-6.48	0.57	-1.76	0.55	-16.75	2.29	2.22
	216	217	LEU	452	9.4	1.94	11.58	1.26	20.98	2.38	-3.14	0.85	-1.85	0.92	-4.99	1.36	-27.72	0.5	-6.6	1.79	-34.32	1.72	-21.45	2.2	3.13	2.46	-18.33	3.05	4.13	0.3	-6.33	1.12	-2.2	1.04	0.01	0.01	0.01	0.01	0.02	0.01	4.14	0.3	-6.32	1.12	-2.18	1.04	-17.31	2.12	-3.2
	217	218	GLU	453	6.26	1.69	10.59	1.48	16.86	2.33	-1.87	0.74	-0.64	0.67	-2.51	1.17	33.74	6.74	4.23	1.35	37.97	7.47	38.13	7.16	14.18	1.72	52.31	7.78	-95.94	6.76	-12.37	1.2	-108.31	7.39	0.6	0.08	0.18	0.04	0.78	0.09	-95.34	6.72	-12.19	1.22	-107.53	7.36	-57.21	1.59	1.99
	218	219	LYS	454	10.97	2.43	10.06	1.35	21.03	2.94	-0.54	0.98	0.65	0.82	0.11	1.39	-64.69	9.11	-6.59	0.93	-71.28	8.86	-54.27	9.24	4.12	1.62	-50.14	9.04	36.95	8.81	-5.66	0.73	31.29	8.51	0.9	0.08	0.21	0.03	1.11	0.09	37.85	8.74	-5.45	0.72	32.41	8.44	-16.41	2.9	-1.33
	219	220	ASP	455	4.42	1.43	11.31	1.81	15.72	2.45	-0.44	0.64	-0.43	0.73	-0.87	1.12	30.91	7.65	-1.3	1.7	29.61	8.42	34.89	7.43	9.57	2.07	44.46	8.13	-96.04	6.88	-16.54	1.58	-112.59	7.55	0.71	0.08	0.11	0.03	0.81	0.09	-95.34	6.82	-16.43	1.56	-111.77	7.49	-60.45	1.47	-6.86
	220	221	TYR	456	8.81	2.08	9.22	1.06	18.03	2.3	-1.8	0.64	-0.88	0.85	-2.68	1.05	-16.73	0.53	-2.9	1.26	-19.63	1.32	-9.72	2.18	5.44	1.67	-4.28	2.65	-4.85	0.4	-2.01	0.81	-6.86	0.91	0.52	0.07	0.04	0.01	0.57	0.07	-4.33	0.4	-1.96	0.81	-6.29	0.9	-14.05	2.25	3.47
	221	222	ARG	457	13.43	3.1	9.68	0.91	23.11	3.32	-5.33	1.27	-0.98	0.65	-6.3	1.39	-243.49	7.18	1.86	0.99	-241.63	7.31	-235.39	6.55	10.56	1.49	-224.83	6.67	56.74	5.44	-9.1	0.96	47.65	5.5	0.32	0.06	0.09	0.03	0.41	0.05	57.07	5.43	-9.01	0.96	48.06	5.49	-178.32	2.7	1.55
	222	223	MET	458	7.05	1.9	9.84	1.49	16.88	2.43	-6.79	0.85	-1.22	0.72	-8.02	1.18	-2.95	0.38	-8.63	1.14	-11.58	1.2	-2.69	2.03	-0.02	1.69	-2.71	2.76	2.57	0.28	-7.2	1.2	-4.63	1.28	0	0.01	0.03	0.02	0.03	0.02	2.57	0.28	-7.17	1.19	-4.59	1.28	-0.12	1.95	-7.18
	223	224	GLU	459	6.19	1.71	9.64	1.17	15.83	2.22	-0.34	0.61	-0.4	0.75	-0.74	1.14	42.78	2.95	5.33	1.25	48.11	3.58	48.63	3.28	14.58	1.56	63.2	4.02	-105.86	3.45	-9.29	0.87	-115.15	3.91	0.97	0.05	0.05	0.02	1.02	0.06	-104.89	3.45	-9.24	0.86	-114.13	3.9	-56.26	1.66	5.34
	224	225	ARG	460	12.9	2.58	11.9	1.12	24.8	2.9	-2.84	1.32	0.15	0.63	-2.69	1.45	-242.2	4.97	12.17	1.25	-230.03	5.15	-232.14	5.02	24.22	1.63	-207.92	5.3	50.39	3.82	-9.59	0.97	40.8	3.95	0.55	0.06	0.17	0.03	0.72	0.06	50.95	3.8	-9.42	0.98	41.52	3.93	-181.2	2.72	14.8
	225	226	PRO	461	12.38	1.38	13.01	1.26	25.39	2.07	-3.68	0.65	-1.27	0.65	-4.95	0.98	-12.37	0.64	-0.5	1.45	-12.86	1.26	-3.67	1.62	11.24	1.66	7.58	2.24	11.49	0.58	-12.31	1.08	-0.82	0.96	0.01	0.01	0.07	0.02	0.08	0.03	11.5	0.58	-12.24	1.07	-0.74	0.95	7.83	1.5	-1
	226	227	GLU	462	6.41	2.06	9.35	1.33	15.76	2.84	-0.16	0.57	-0.19	0.62	-0.36	0.98	36.07	3.66	4.36	1.41	40.43	4.34	42.32	4.17	13.53	1.76	55.84	4.88	-99.62	3.76	-13.34	1.14	-112.96	4.37	1.06	0.07	0.14	0.04	1.2	0.09	-98.57	3.72	-13.2	1.13	-111.77	4.34	-56.25	1.89	0.33
	227	228	GLY	463	0	0	9.82	1.56	9.82	1.56	0	0	-0.94	0.56	-0.94	0.56	0	0	-8.33	1.98	-8.33	1.98	0	0	0.54	2.64	0.54	2.64	0	0	-4.66	1.46	-4.66	1.46	0	0	0.47	0.06	0.47	0.06	0	0	-4.19	1.44	-4.19	1.44	0	0	-3.64
	228	229	CYS	464	3.33	0.94	11.26	1.23	14.6	1.68	-3.56	0.48	1	0.94	-2.56	1.17	6	0.89	-1.73	1.71	4.27	1.81	5.77	1.28	10.54	2.13	16.31	2.25	-1.17	0.36	-0.24	1.01	-1.4	1.05	0.01	0.01	0.07	0.02	0.08	0.03	-1.16	0.36	-0.16	1	-1.32	1.03	4.61	1.15	10.37
	229	230	PRO	465	12.38	1.71	13.15	1.38	25.54	2.28	-1.79	0.63	-1.62	0.82	-3.41	1.02	-10.06	0.68	0.79	1.28	-9.26	1.28	0.53	1.87	12.33	1.7	12.86	2.59	9.75	0.63	-11.72	0.72	-1.98	0.6	0.35	0.07	0.07	0.01	0.42	0.07	10.09	0.63	-11.65	0.72	-1.56	0.59	10.63	1.83	0.67
	230	231	GLU	466	7.22	2.25	11.92	1.58	19.14	2.93	0.63	1.07	-1.6	0.69	-0.97	1.46	4.55	3.53	2.42	1.06	6.97	3.83	12.4	3.57	12.74	1.61	25.13	4.1	-70.55	2.97	-8.2	0.79	-78.75	3.21	0.86	0.04	0.04	0.01	0.9	0.05	-69.69	2.96	-8.16	0.78	-77.85	3.2	-57.29	2.16	4.58
	231	232	LYS	467	11.71	2.58	10.94	1.27	22.65	2.63	-1.36	1.09	-1.56	0.64	-2.92	1.31	-70.79	5.09	-2.9	1.11	-73.69	4.95	-60.43	5.55	6.48	1.52	-53.96	5.53	40.75	4.78	-4.49	0.81	36.26	4.83	0.77	0.11	0.03	0.01	0.79	0.11	41.52	4.74	-4.47	0.81	37.06	4.77	-18.91	2.8	2.01
	232	233	VAL	468	6.07	1.54	11.17	1.23	17.24	1.99	-2.33	0.7	-1.25	1	-3.58	1.33	-20.69	0.44	-10.62	1.03	-31.31	1.11	-16.95	1.67	-0.69	1.43	-17.64	2.15	5.61	0.29	-7.51	0.55	-1.9	0.46	0.08	0.02	0	0	0.08	0.02	5.69	0.29	-7.51	0.55	-1.82	0.45	-11.26	1.65	-8.2
	233	234	TYR	469	8.35	2.09	10.79	1.53	19.14	2.46	-4.59	0.71	-2.66	0.9	-7.25	1.15	-17.49	0.75	-11.98	1.18	-29.47	1.44	-13.73	2.11	-3.84	1.95	-17.57	2.69	-4.03	0.54	-1.73	0.59	-5.76	0.8	0.29	0.07	0	0	0.29	0.07	-3.74	0.54	-1.73	0.59	-5.46	0.8	-17.47	2.12	-5.57
	234	235	GLU	470	6.24	1.88	11.04	1.33	17.28	2.36	-1.25	0.86	-2.09	0.85	-3.34	1.32	8.96	4.38	-1.64	1.31	7.32	4.51	13.95	4.74	7.31	1.51	21.26	5.13	-72.82	4.16	-8.29	0.84	-81.11	4.22	0.55	0.05	0.01	0.01	0.56	0.05	-72.27	4.14	-8.28	0.83	-80.55	4.2	-58.31	1.78	-0.97
	235	236	LEU	471	9.1	1.66	11.81	1.28	20.91	2.32	-3.09	0.83	-1.69	0.84	-4.78	1.24	-28.06	0.53	-3.85	1.13	-31.91	1.17	-22.05	1.87	6.27	1.58	-15.78	2.63	4.31	0.31	-5.69	0.4	-1.37	0.39	0.09	0.03	0.01	0.01	0.1	0.03	4.41	0.31	-5.68	0.4	-1.27	0.39	-17.65	1.86	0.59
	236	237	MET	472	7.55	2.16	11.84	1.21	19.39	2.5	-7.26	0.74	-3.38	0.83	-10.64	1.19	-3.04	0.53	-0.16	1.13	-3.2	1.2	-2.75	2.28	8.31	1.35	5.56	2.63	3.04	0.4	-4.89	0.58	-1.85	0.63	0	0	0	0	0	0	3.04	0.4	-4.89	0.58	-1.85	0.63	0.29	2.16	3.42
	237	238	ARG	473	13.19	2.87	11.37	1.49	24.56	3.25	-4.65	0.78	-2.48	0.64	-7.13	1.08	-214.76	3.89	-5.04	1.39	-219.8	3.61	-206.22	5.03	3.85	1.69	-202.38	4.73	30.21	3.92	-4.97	0.92	25.24	3.74	0.81	0.06	0.03	0.02	0.84	0.07	31.02	3.88	-4.94	0.92	26.08	3.71	-175.2	2.51	-1.09
	238	239	ALA	474	2.74	0.81	10.72	1.32	13.46	1.55	-1.37	0.27	-2.45	0.74	-3.83	0.76	2.38	0.13	-12.88	0.96	-10.51	0.98	3.74	0.83	-4.62	1.25	-0.88	1.63	-0.21	0.06	-0.98	0.68	-1.19	0.7	0.17	0.03	0.04	0.02	0.22	0.03	-0.04	0.07	-0.93	0.67	-0.97	0.69	3.7	0.83	-5.55
	239	240	CYS	475	3.35	1	10.17	1.24	13.52	1.76	-3.83	0.58	-3.38	0.66	-7.21	0.9	5.85	0.57	-9.3	0.95	-3.45	1.04	5.36	1.3	-2.5	1.38	2.86	1.99	-1.72	0.17	1.4	0.44	-0.32	0.48	0	0	0	0	0	0	-1.72	0.17	1.4	0.44	-0.32	0.48	3.64	1.26	-1.1
	240	241	TRP	476	11.21	2.32	10.19	1.4	21.4	2.97	-9.92	0.71	-1.37	0.89	-11.29	1.19	7.06	0.65	-12.55	1.69	-5.48	1.83	8.35	2.43	-3.73	2.08	4.63	3.42	0.95	0.5	-0.89	0.69	0.06	0.94	0.01	0.01	0	0.01	0.01	0.01	0.96	0.49	-0.89	0.69	0.07	0.94	9.31	2.39	-4.61
	241	242	GLN	477	13.6	1.84	9.76	1.16	23.36	2.35	-3.08	0.72	-1.27	0.8	-4.35	1.18	-72.52	3.21	-8.07	1.16	-80.6	3.19	-62	3.19	0.42	1.57	-61.58	3.15	-3.32	2.03	-1.5	0.46	-4.81	1.93	0.52	0.04	0	0.01	0.52	0.04	-2.79	2.03	-1.49	0.46	-4.29	1.93	-64.8	1.85	-1.07
	242	243	TRP	478	11.41	2.4	11.72	1.26	23.13	2.6	-3.78	0.94	-2.07	0.75	-5.86	1.31	10.26	0.83	-6.82	1.58	3.44	1.7	17.88	2.89	2.83	1.6	20.72	3.31	-5.2	0.89	-3.86	0.72	-9.06	1.13	0.74	0.12	0.05	0.02	0.79	0.12	-4.46	0.81	-3.82	0.72	-8.28	1.07	13.42	2.62	-0.98
	243	244	ASN	479	11.17	1.37	11.85	1.33	23.02	2.06	-1.93	0.58	-0.67	0.81	-2.6	1.11	-80.82	2.6	3.01	1.94	-77.81	4.02	-71.58	2.96	14.18	1.89	-57.39	4.18	-5.77	2.3	-4.47	0.96	-10.24	2.98	0.56	0.03	0.04	0.01	0.6	0.04	-5.21	2.29	-4.42	0.96	-9.63	2.97	-76.79	1.37	9.76
	244	245	PRO	480	11.89	1.39	14.23	1.16	26.12	1.87	-2.7	0.6	-2.67	0.73	-5.37	0.9	-6.57	1.42	-0.55	2.1	-7.12	2.06	2.63	2.06	11	2.31	13.63	2.74	6.21	1.3	-9.81	1.18	-3.6	1.28	0.29	0.05	0	0	0.29	0.05	6.5	1.32	-9.81	1.18	-3.31	1.3	9.13	1.52	1.19
	245	246	SER	481	3.71	1.11	10.18	1.21	13.89	1.84	-0.63	0.36	-0.42	0.6	-1.05	0.79	-3.02	0.84	-6.2	1.52	-9.22	1.63	0.06	1.43	3.56	1.56	3.62	2.26	-1.91	0.67	-8.92	1.31	-10.83	1.39	0.51	0.03	0.19	0.04	0.71	0.04	-1.39	0.67	-8.73	1.29	-10.12	1.38	-1.33	1.32	-5.17
	246	247	ASP	482	4.5	1.55	10.03	1.2	14.53	2.03	-1.16	0.74	-0.69	0.63	-1.86	1	25.51	5.18	9.99	0.94	35.49	5.39	28.84	5.51	19.32	1.46	48.16	5.88	-90.97	5.08	-16.4	0.86	-107.37	5.29	0.47	0.04	0.15	0.03	0.62	0.04	-90.51	5.06	-16.25	0.85	-106.75	5.28	-61.66	1.45	3.07
	247	248	ARG	483	13.24	2.84	10.93	1.36	24.17	3.31	-7.75	1.66	-0.17	0.79	-7.92	1.93	-246.07	4.6	3.87	2.21	-242.21	4.91	-240.59	5.11	14.63	2.32	-225.96	5.64	52.22	3.91	-2.85	1.43	49.37	4.19	0	0	0.03	0.02	0.03	0.02	52.22	3.91	-2.82	1.42	49.39	4.19	-188.37	2.96	11.81
	248	249	PRO	484	12.18	1.42	12.71	1.14	24.9	1.99	-3.23	0.68	-1.89	0.75	-5.12	1.04	-14.45	0.92	1.39	1.84	-13.06	1.52	-5.49	1.74	12.21	2.02	6.71	2.59	13.82	0.83	-12.18	1.34	1.64	0.96	0.13	0.04	0.04	0.02	0.17	0.05	13.95	0.82	-12.14	1.34	1.81	0.97	8.45	1.48	0.07
	249	250	SER	485	3.34	0.95	9.77	1.21	13.11	1.67	-1.29	0.8	-1.64	0.97	-2.94	1.29	-7.62	3.05	-9.72	1.57	-17.34	3.74	-5.57	2.66	-1.6	1.69	-7.16	3.25	1.72	1.95	-4.18	0.62	-2.46	2.27	0.19	0.04	0	0	0.19	0.04	1.92	1.94	-4.18	0.62	-2.26	2.25	-3.65	1.39	-5.78
	250	251	PHE	486	8.28	1.5	11.35	1.35	19.63	2.28	-6.03	0.75	-2.23	0.95	-8.26	1.12	-0.58	0.26	-10.52	1.31	-11.1	1.29	1.67	1.74	-1.39	1.41	0.28	2.42	1.05	0.17	-2.11	0.58	-1.06	0.61	0	0	0	0	0	0	1.05	0.17	-2.11	0.58	-1.06	0.61	2.71	1.72	-3.5
	251	252	ALA	487	2.85	0.9	11.6	1.38	14.45	1.81	-1.02	0.24	-2.17	0.82	-3.19	0.86	2.37	0.17	-10.3	1.49	-7.93	1.55	4.21	0.98	-0.88	1.82	3.33	2.23	-0.44	0.1	-1.53	0.86	-1.97	0.9	0.28	0.05	0.02	0.02	0.3	0.06	-0.15	0.12	-1.51	0.85	-1.67	0.88	4.05	0.96	-2.39
	252	253	GLU	488	6.03	1.47	11.08	1.25	17.11	1.99	-1.36	1.02	-1.79	0.78	-3.15	1.25	33	6.85	1.6	1.03	34.6	7.29	37.67	6.38	10.89	1.55	48.56	7.12	-95.49	5.85	-11.51	0.85	-107	6.31	0.67	0.05	0.05	0.02	0.72	0.06	-94.82	5.83	-11.46	0.84	-106.28	6.28	-57.15	1.66	-0.57
	253	254	ILE	489	10.01	2.16	11.51	1.37	21.52	2.54	-3.29	1.17	-1.02	0.93	-4.31	1.51	-7.83	0.34	-3.26	1.13	-11.09	1.08	-1.12	2.44	7.22	1.65	6.11	2.92	6.26	0.31	-7.11	0.59	-0.85	0.48	0	0	0	0	0	0	6.26	0.31	-7.11	0.59	-0.84	0.48	5.15	2.45	0.12
	254	255	HIS	490	25.14	1.72	11.24	1.25	36.38	2.04	-5.92	0.96	-2.19	0.91	-8.11	1.44	-10.46	3.03	-8.88	1.63	-19.34	3.85	8.76	3.81	0.17	1.59	8.93	4.17	-4.39	2.56	-4.77	0.88	-9.16	2.97	0.33	0.12	0.01	0.01	0.33	0.12	-4.06	2.5	-4.76	0.87	-8.82	2.89	4.7	2.05	-4.59
	255	256	GLN	491	14.02	1.84	11.02	1.3	25.04	2.35	-1.48	0.66	-1.15	0.8	-2.63	1.11	-67.87	3.15	-8.29	2	-76.17	3.93	-55.33	3.35	1.58	2.16	-53.76	4.15	-6.81	2.49	-4.82	1.03	-11.63	2.76	0.82	0.09	0.04	0.02	0.86	0.09	-5.98	2.43	-4.79	1.02	-10.77	2.7	-61.32	1.95	-3.21
	256	257	ALA	492	2.75	0.76	11.37	1.29	14.12	1.67	-1.41	0.3	-2.01	0.85	-3.42	0.92	2.5	0.15	-7.55	1.75	-5.05	1.8	3.84	0.82	1.81	2.04	5.65	2.45	-0.44	0.1	-1.41	0.74	-1.85	0.79	0.11	0.04	0.06	0.02	0.16	0.05	-0.34	0.13	-1.35	0.73	-1.69	0.81	3.51	0.82	0.46
	257	258	PHE	493	8.8	1.93	12.02	1.53	20.83	2.56	-4.61	0.76	-2.16	0.92	-6.78	1.24	-0.49	0.4	-10.44	1.37	-10.93	1.42	3.7	2.08	-0.58	1.69	3.12	2.81	0.89	0.2	-2.72	0.63	-1.83	0.65	0.01	0.01	0	0	0.01	0.01	0.89	0.2	-2.72	0.63	-1.83	0.65	4.6	2.11	-3.3
	258	259	GLU	494	6.31	1.78	10.81	1.51	17.12	2.57	-1.77	0.78	-0.87	0.91	-2.64	1.41	52.6	5.03	1.28	2.27	53.88	5.66	57.13	5.56	11.22	2.39	68.35	6.21	-114.3	5.2	-14.01	1.38	-128.31	5.49	0.62	0.1	0.05	0.05	0.68	0.13	-113.68	5.17	-13.96	1.36	-127.63	5.43	-56.55	1.71	-2.73
	259	260	THR	495	6.69	1.75	10.9	1.47	17.59	2.45	-0.5	0.77	-0.14	0.88	-0.64	1.39	-27.86	1.96	-6.04	1.58	-33.9	2.48	-21.68	2.47	4.73	1.95	-16.95	2.95	3.23	1.6	-8.81	1.28	-5.59	1.99	0.55	0.07	0.15	0.06	0.7	0.1	3.78	1.56	-8.66	1.32	-4.88	2	-17.89	1.88	-3.94
	260	261	MET	496	7.12	1.66	11.15	1.43	18.28	2.33	-5.27	0.81	-0.71	0.79	-5.98	1.21	-5.13	0.73	-2.06	1.68	-7.19	1.77	-3.28	2.03	8.39	1.95	5.11	3.06	4.61	0.55	-8.13	1.43	-3.52	1.51	0.14	0.06	0.19	0.04	0.33	0.07	4.75	0.56	-7.94	1.44	-3.19	1.5	1.47	1.87	0.45
	261	262	PHE	497	8.41	2.08	10.46	1.33	18.87	2.53	-1.05	0.85	-0.71	0.78	-1.77	1.25	0.49	0.54	0.33	1.24	0.82	1.33	7.85	2.32	10.08	1.46	17.92	2.71	-0.79	0.48	-5.76	0.99	-6.55	1.17	0.48	0.09	0.09	0.04	0.57	0.11	-0.31	0.44	-5.67	0.98	-5.98	1.14	7.54	2.2	4.4
	262	263	GLN	498	13.62	2.44	6.6	1.41	20.22	3.18	-1.28	0.82	0.43	0.59	-0.86	1.07	14.53	6.83	-11.24	2.17	3.3	5.25	26.87	6.82	-4.21	2.51	22.66	5.62	-216.15	6.18	72.96	1.93	-143.19	4.6	1.38	0.08	0.09	0.03	1.47	0.08	-214.77	6.17	73.05	1.92	-141.72	4.6	-187.9	2.46	68.84
=>>	LIGAND
	Number	Residue	Residue Name	Residue ID	SINT		BINT		TINT		SVDW		BVDW		TVDW		SELE		BELE		TELE		SGAS		BGAS		TGAS		SGB		BGB		TGB		SGBSUR		BGBSUR		TGBSUR		SGBSOL		BGBSOL		TGBSOL		SGBTOT		BGBTOT
	0	264	LIG	499	68.45	6.95	0	0	68.45	6.95	11.8	1.74	0	0	11.8	1.74	-667.21	6.74	0	0	-667.21	6.74	-586.97	5.32	0	0	-586.97	5.32	-80.24	2.8	0	0	-80.24	2.8	6.37	0.06	0	0	6.37	0.06	-73.87	2.81	0	0	-73.87	2.81	-660.84	4.48	0
=>>	DELTA
	Number	Residue	Residue Name	Residue ID	SINT		BINT		TINT		SVDW		BVDW		TVDW		SELE		BELE		TELE		SGAS		BGAS		TGAS		SGB		BGB		TGB		SGBSUR		BGBSUR		TGBSUR		SGBSOL		BGBSOL		TGBSOL		SGBTOT		BGBTOT
	0	1	TRP	235	0	0	0	0	0	0	-0.02	0	0	0	-0.02	0	8.04	0.21	0.69	0.06	8.73	0.24	8.03	0.21	0.68	0.06	8.71	0.24	-7.89	0.2	-0.65	0.06	-8.54	0.23	0	0	0	0	0	0	-7.89	0.2	-0.65	0.06	-8.54	0.23	0.14	0.01	0.03
	1	2	GLU	236	0	0	0	0	0	0	0	0	0	0	0	0	-7.6	0.32	-0.86	0.04	-8.46	0.33	-7.6	0.32	-0.86	0.04	-8.46	0.33	7.53	0.32	0.85	0.04	8.38	0.33	0	0	0	0	0	0	7.53	0.32	0.85	0.04	8.38	0.33	-0.07	0	-0.01
	2	3	MET	237	0	0	0	0	0	0	0	0	0	0	-0.01	0	0.3	0.07	-0.52	0.03	-0.22	0.07	0.3	0.07	-0.53	0.03	-0.23	0.07	-0.3	0.07	0.52	0.03	0.22	0.07	0	0	0	0	0	0	-0.3	0.07	0.52	0.03	0.22	0.07	0	0	0
	3	4	GLU	238	0	0	0	0	0	0	0	0	0	0	0	0	-5.61	0.18	-0.89	0.04	-6.5	0.19	-5.61	0.18	-0.89	0.04	-6.5	0.19	5.54	0.18	0.88	0.04	6.43	0.19	0	0	0	0	0	0	5.54	0.18	0.88	0.04	6.43	0.19	-0.06	0	-0.01
	4	5	ARG	239	0	0	0	0	0	0	0	0	0	0	0	0	6.4	0.2	-0.25	0.02	6.15	0.2	6.4	0.2	-0.25	0.02	6.15	0.2	-6.31	0.2	0.25	0.02	-6.06	0.2	0	0	0	0	0	0	-6.31	0.2	0.25	0.02	-6.06	0.2	0.08	0	0
	5	6	THR	240	0	0	0	0	0	0	0	0	0	0	0	0	0.25	0.04	-0.25	0.01	0	0.04	0.25	0.04	-0.25	0.01	0	0.04	-0.24	0.03	0.25	0.01	0	0.04	0	0	0	0	0	0	-0.24	0.03	0.25	0.01	0	0.04	0	0	0
	6	7	ASP	241	0	0	0	0	0	0	0	0	0	0	0	0	-5.37	0.17	-0.85	0.04	-6.22	0.19	-5.37	0.17	-0.85	0.04	-6.22	0.19	5.32	0.17	0.84	0.04	6.16	0.19	0	0	0	0	0	0	5.32	0.17	0.84	0.04	6.16	0.19	-0.06	0	-0.01
	7	8	ILE	242	0	0	0	0	0	0	-0.01	0	0	0	-0.01	0	0.61	0.02	-0.52	0.03	0.1	0.03	0.61	0.01	-0.52	0.03	0.09	0.03	-0.61	0.01	0.52	0.03	-0.09	0.03	0	0	0	0	0	0	-0.61	0.01	0.52	0.03	-0.09	0.03	0	0	0
	8	9	THR	243	0	0	0	0	0	0	0	0	0	0	0	0	0.3	0.04	-0.34	0.03	-0.04	0.05	0.3	0.04	-0.34	0.03	-0.04	0.05	-0.29	0.04	0.34	0.03	0.05	0.05	0	0	0	0	0	0	-0.29	0.04	0.34	0.03	0.05	0.05	0.01	0	0
	9	10	MET	244	0	0	0	0	0	0	-0.01	0	0	0	-0.01	0	0.31	0.03	-0.22	0.03	0.09	0.03	0.3	0.03	-0.22	0.03	0.08	0.03	-0.31	0.03	0.23	0.03	-0.08	0.03	0	0	0	0	0	0	-0.31	0.03	0.23	0.03	-0.08	0.03	0	0	0
	10	11	LYS	245	0	0	0	0	0	0	0	0	0	0	0	0	5.47	0.18	-0.06	0.03	5.42	0.19	5.47	0.18	-0.06	0.03	5.41	0.19	-5.39	0.17	0.06	0.03	-5.33	0.18	0	0	0	0	0	0	-5.39	0.17	0.06	0.03	-5.33	0.18	0.08	0.01	0.01
	11	12	HIS	246	0	0	0	0	0	0	0	0	-0.01	0	-0.01	0	0.19	0.06	-0.28	0.02	-0.08	0.06	0.19	0.06	-0.28	0.02	-0.09	0.06	-0.18	0.06	0.28	0.02	0.09	0.06	0	0	0	0	0	0	-0.18	0.06	0.28	0.02	0.09	0.06	0.01	0	-0.01
	12	13	LYS	247	0	0	0	0	0	0	-0.01	0	-0.01	0	-0.02	0	7.47	0.3	-0.03	0.02	7.44	0.3	7.46	0.29	-0.04	0.02	7.42	0.3	-7.34	0.29	0.03	0.02	-7.31	0.29	0	0	0	0	0	0	-7.34	0.29	0.03	0.02	-7.31	0.29	0.12	0.01	-0.01
	13	14	LEU	248	0	0	0	0	0	0	-0.48	0.16	-0.03	0.01	-0.5	0.16	0.54	0.04	-0.54	0.07	0	0.08	0.06	0.17	-0.56	0.07	-0.5	0.16	-0.51	0.04	0.54	0.07	0.04	0.08	-0.06	0.01	0	0	-0.06	0.01	-0.57	0.04	0.54	0.07	-0.02	0.08	-0.51	0.16	-0.02
	14	15	GLY	249	0	0	0	0	0	0	0	0	-0.01	0	-0.01	0	0	0	-0.27	0.08	-0.27	0.08	0	0	-0.28	0.08	-0.28	0.08	0	0	0.3	0.08	0.3	0.08	0	0	0	0	0	0	0	0	0.3	0.08	0.3	0.08	0	0	0.01
	15	16	GLY	250	0	0	0	0	0	0	0	0	0	0	0	0	0	0	0.01	0.04	0.01	0.04	0	0	0.01	0.04	0.01	0.04	0	0	0	0.04	0	0.04	0	0	0	0	0	0	0	0	0	0.04	0	0.04	0	0	0.01
	16	17	GLY	251	0	0	0	0	0	0	0	0	0	0	0	0	0	0	-0.06	0.09	-0.06	0.09	0	0	-0.07	0.09	-0.07	0.09	0	0	0.08	0.09	0.08	0.09	0	0	0	0	0	0	0	0	0.08	0.09	0.08	0.09	0	0	0.01
	17	18	GLN	252	0	0	0	0	0	0	-0.01	0	-0.03	0.01	-0.04	0.01	0.26	0.07	-0.56	0.07	-0.3	0.09	0.24	0.07	-0.59	0.07	-0.35	0.09	-0.23	0.07	0.6	0.06	0.37	0.09	0	0	0	0	0	0	-0.23	0.07	0.6	0.06	0.37	0.09	0.01	0.01	0.01
	18	19	TYR	253	0	0	0	0	0	0	-0.73	0.18	-0.12	0.06	-0.85	0.21	0.05	0.07	-0.72	0.15	-0.67	0.17	-0.67	0.23	-0.85	0.15	-1.52	0.3	0.18	0.11	0.84	0.14	1.02	0.19	-0.02	0.01	0	0	-0.02	0.01	0.16	0.1	0.84	0.14	0.99	0.19	-0.52	0.16	-0.01
	19	20	GLY	254	0	0	0	0	0	0	0	0	-0.04	0.01	-0.04	0.01	0	0	0.22	0.06	0.22	0.06	0	0	0.18	0.05	0.18	0.05	0	0	-0.17	0.06	-0.17	0.06	0	0	0	0	0	0	0	0	-0.17	0.06	-0.17	0.06	0	0	0.01
	20	21	GLU	255	0	0	0	0	0	0	-0.01	0	-0.05	0.01	-0.06	0.01	-7.15	0.3	-1.02	0.09	-8.17	0.32	-7.16	0.31	-1.07	0.09	-8.23	0.33	7.09	0.3	1.01	0.1	8.09	0.32	0	0	0	0	0	0	7.09	0.3	1.01	0.1	8.09	0.32	-0.07	0.01	-0.07
	21	22	VAL	256	0	0	0	0	0	0	-0.99	0.22	-0.12	0.02	-1.11	0.23	0.81	0.08	-0.88	0.06	-0.07	0.1	-0.18	0.26	-1	0.07	-1.18	0.29	-0.85	0.07	0.8	0.05	-0.04	0.08	-0.08	0.02	0	0	-0.08	0.02	-0.93	0.07	0.8	0.05	-0.13	0.08	-1.11	0.24	-0.2
	22	23	TYR	257	0	0	0	0	0	0	-0.02	0	-0.08	0.01	-0.11	0.02	0.11	0.01	-0.34	0.06	-0.22	0.05	0.09	0.01	-0.42	0.05	-0.33	0.05	-0.1	0.01	0.39	0.05	0.3	0.05	0	0	0	0	0	0	-0.1	0.01	0.39	0.05	0.3	0.05	-0.01	0	-0.02
	23	24	GLU	258	0	0	0	0	0	0	-0.03	0.01	-0.03	0.01	-0.06	0.01	-5.16	0.15	-0.75	0.04	-5.9	0.17	-5.19	0.15	-0.78	0.04	-5.96	0.17	5.15	0.15	0.77	0.04	5.91	0.17	0	0	0	0	0	0	5.15	0.15	0.77	0.04	5.91	0.17	-0.04	0.01	-0.01
	24	25	GLY	259	0	0	0	0	0	0	0	0	-0.01	0	-0.01	0	0	0	-0.01	0.04	-0.01	0.04	0	0	-0.02	0.03	-0.02	0.03	0	0	0.02	0.03	0.02	0.03	0	0	0	0	0	0	0	0	0.02	0.03	0.02	0.03	0	0	0
	25	26	VAL	260	0	0	0	0	0	0	0	0	0	0	-0.01	0	0.64	0.01	-0.66	0.03	-0.02	0.03	0.63	0.01	-0.66	0.03	-0.03	0.03	-0.62	0.01	0.65	0.03	0.03	0.03	0	0	0	0	0	0	-0.62	0.01	0.65	0.03	0.03	0.03	0.01	0	-0.01
	26	27	TRP	261	0	0	0	0	0	0	-0.01	0	0	0	-0.01	0	0.14	0.03	-0.14	0.02	0	0.04	0.13	0.03	-0.14	0.02	-0.01	0.04	-0.14	0.03	0.14	0.02	0	0.03	0	0	0	0	0	0	-0.14	0.03	0.14	0.02	0	0.03	-0.01	0	0
	27	28	LYS	262	0	0	0	0	0	0	0	0	0	0	0	0	5.59	0.11	-0.06	0.02	5.53	0.12	5.59	0.11	-0.06	0.02	5.53	0.12	-5.51	0.11	0.06	0.02	-5.45	0.11	0	0	0	0	0	0	-5.51	0.11	0.06	0.02	-5.45	0.11	0.08	0	0
	28	29	LYS	263	0	0	0	0	0	0	0	0	0	0	0	0	6.31	0.42	-0.05	0.02	6.27	0.42	6.31	0.42	-0.05	0.02	6.27	0.42	-6.23	0.42	0.05	0.02	-6.18	0.41	0	0	0	0	0	0	-6.23	0.42	0.05	0.02	-6.18	0.41	0.08	0.01	0
	29	30	TYR	264	0	0	0	0	0	0	0	0	0	0	0	0	0.12	0.02	-0.12	0.03	-0.01	0.03	0.12	0.02	-0.12	0.03	-0.01	0.03	-0.11	0.02	0.13	0.03	0.01	0.03	0	0	0	0	0	0	-0.11	0.02	0.13	0.03	0.01	0.03	0	0	0
	30	31	SER	265	0	0	0	0	0	0	0	0	0	0	0	0	0.3	0.03	-0.25	0.02	0.05	0.04	0.3	0.03	-0.25	0.02	0.05	0.04	-0.29	0.03	0.25	0.02	-0.04	0.04	0	0	0	0	0	0	-0.29	0.03	0.25	0.02	-0.04	0.04	0.01	0	0
	31	32	LEU	266	0	0	0	0	0	0	0	0	0	0	-0.01	0	0.51	0.02	-0.49	0.03	0.02	0.03	0.5	0.02	-0.49	0.03	0.01	0.03	-0.5	0.02	0.49	0.03	-0.01	0.03	0	0	0	0	0	0	-0.5	0.02	0.49	0.03	-0.01	0.03	0	0	-0.01
	32	33	THR	267	0	0	0	0	0	0	-0.01	0	-0.01	0	-0.02	0	0.4	0.03	-0.5	0.04	-0.1	0.03	0.39	0.03	-0.51	0.04	-0.13	0.03	-0.38	0.03	0.48	0.03	0.11	0.03	0	0	0	0	0	0	-0.38	0.03	0.48	0.03	0.11	0.03	0.01	0	-0.03
	33	34	VAL	268	0	0	0	0	0	0	-0.02	0	-0.06	0.01	-0.09	0.01	0.85	0.03	-0.49	0.04	0.36	0.06	0.82	0.03	-0.55	0.04	0.27	0.06	-0.88	0.03	0.37	0.04	-0.51	0.06	0	0	0	0	0	0	-0.88	0.03	0.37	0.04	-0.51	0.06	-0.06	0.01	-0.18
	34	35	ALA	269	0	0	0	0	0	0	-0.62	0.19	-0.44	0.09	-1.06	0.18	-0.04	0.02	-0.57	0.21	-0.6	0.22	-0.65	0.19	-1.01	0.26	-1.66	0.26	0.08	0.02	0.43	0.16	0.51	0.16	-0.07	0.02	0	0	-0.07	0.02	0.01	0.03	0.43	0.16	0.44	0.16	-0.65	0.19	-0.58
	35	36	VAL	270	0	0	0	0	0	0	-0.05	0.01	-0.26	0.06	-0.31	0.07	0.87	0.04	-0.83	0.09	0.04	0.1	0.81	0.05	-1.09	0.12	-0.27	0.14	-0.92	0.04	0.7	0.06	-0.22	0.06	0	0	0	0	0	0	-0.92	0.04	0.7	0.06	-0.22	0.06	-0.11	0.03	-0.39
	36	37	LYS	271	0	0	0	0	0	0	-1.41	0.27	-0.37	0.08	-1.78	0.29	17.83	1.82	-0.13	0.09	17.7	1.83	16.42	1.78	-0.5	0.11	15.92	1.76	-16.99	1.52	0.39	0.08	-16.6	1.53	-0.14	0.03	0	0	-0.15	0.03	-17.13	1.52	0.39	0.08	-16.74	1.53	-0.71	0.53	-0.11
	37	38	THR	272	0	0	0	0	0	0	-0.01	0	-0.04	0.01	-0.05	0.01	0.54	0.07	-0.69	0.08	-0.16	0.09	0.53	0.07	-0.73	0.08	-0.21	0.09	-0.52	0.07	0.78	0.09	0.26	0.08	0	0	0	0	0	0	-0.52	0.07	0.78	0.09	0.26	0.08	0	0.01	0.05
	38	39	LEU	273	0	0	0	0	0	0	-0.01	0	-0.01	0	-0.02	0	0.71	0.03	-0.39	0.03	0.32	0.04	0.7	0.03	-0.4	0.03	0.3	0.04	-0.7	0.03	0.41	0.03	-0.3	0.04	0	0	0	0	0	0	-0.7	0.03	0.41	0.03	-0.3	0.04	0	0	0.01
	39	40	LYS	274	0	0	0	0	0	0	-0.01	0	0	0	-0.01	0	11.78	0.79	0.01	0.02	11.79	0.79	11.77	0.79	0.01	0.02	11.78	0.79	-11.57	0.77	-0.01	0.02	-11.58	0.77	0	0	0	0	0	0	-11.57	0.77	-0.01	0.02	-11.58	0.77	0.2	0.02	0
	40	41	ASP	276	0	0	0	0	0	0	0	0	0	0	0	0	-6.42	0.21	-0.96	0.04	-7.38	0.22	-6.43	0.21	-0.96	0.04	-7.39	0.22	6.36	0.21	0.95	0.04	7.31	0.22	0	0	0	0	0	0	6.36	0.21	0.95	0.04	7.31	0.22	-0.07	0	-0.01
	41	42	THR	277	0	0	0	0	0	0	0	0	0	0	0	0	0.41	0.06	-0.53	0.07	-0.13	0.08	0.4	0.06	-0.53	0.07	-0.13	0.08	-0.4	0.06	0.54	0.06	0.14	0.08	0	0	0	0	0	0	-0.4	0.06	0.54	0.06	0.14	0.08	0.01	0	0
	42	43	MET	278	0	0	0	0	0	0	0	0	0	0	-0.01	0	0.46	0.09	-0.67	0.06	-0.2	0.09	0.46	0.09	-0.67	0.06	-0.21	0.09	-0.46	0.08	0.67	0.06	0.22	0.09	0	0	0	0	0	0	-0.46	0.08	0.67	0.06	0.22	0.09	0.01	0	0
	43	44	GLU	279	0	0	0	0	0	0	-0.03	0.01	-0.02	0	-0.04	0.01	-11.91	1.08	-1.96	0.14	-13.87	1.15	-11.94	1.09	-1.98	0.14	-13.92	1.16	11.84	1.09	1.94	0.14	13.78	1.15	0	0	0	0	0	0	11.84	1.09	1.94	0.14	13.78	1.15	-0.1	0.02	-0.04
	44	45	VAL	280	0	0	0	0	0	0	0	0	-0.01	0	-0.02	0	1.12	0.05	-1.51	0.12	-0.39	0.09	1.12	0.05	-1.52	0.12	-0.41	0.1	-1.1	0.05	1.5	0.12	0.4	0.09	0	0	0	0	0	0	-1.1	0.05	1.5	0.12	0.4	0.09	0.01	0	-0.02
	45	46	GLU	281	0	0	0	0	0	0	-0.02	0.01	-0.07	0.04	-0.08	0.05	-8.98	0.68	-1.77	0.12	-10.75	0.72	-8.99	0.68	-1.84	0.15	-10.83	0.73	8.91	0.68	1.8	0.14	10.71	0.73	0	0	0	0	0	0	8.91	0.68	1.8	0.14	10.71	0.72	-0.08	0.01	-0.04
	46	47	GLU	282	0	0	0	0	0	0	-0.43	0.23	-0.38	0.15	-0.8	0.31	-15.82	1.81	-2.94	0.28	-18.77	1.9	-16.25	1.88	-3.32	0.35	-19.57	1.95	16.07	1.95	3.09	0.32	19.15	2.01	-0.11	0.05	-0.01	0.01	-0.12	0.05	15.96	1.95	3.08	0.32	19.04	2	-0.29	0.24	-0.24
	47	48	PHE	283	0	0	0	0	0	0	-0.09	0.01	-0.13	0.03	-0.23	0.04	0.09	0.04	-1.41	0.17	-1.33	0.18	-0.01	0.05	-1.55	0.18	-1.55	0.19	-0.04	0.05	1.5	0.17	1.46	0.18	0	0	0	0	0	0	-0.04	0.05	1.5	0.17	1.46	0.18	-0.04	0.02	-0.05
	48	49	LEU	284	0	0	0	0	0	0	-0.03	0	-0.08	0.01	-0.1	0.02	0.93	0.04	-1.49	0.15	-0.56	0.15	0.91	0.04	-1.57	0.16	-0.66	0.15	-0.92	0.04	1.51	0.15	0.59	0.14	0	0	0	0	0	0	-0.92	0.04	1.51	0.15	0.59	0.14	-0.01	0	-0.05
	49	50	LYS	285	0	0	0	0	0	0	-0.58	0.2	-0.55	0.16	-1.13	0.26	15.52	1.27	-0.83	0.3	14.69	1.35	14.94	1.19	-1.38	0.37	13.56	1.28	-15.08	1.15	1	0.38	-14.07	1.3	-0.14	0.04	-0.02	0.02	-0.16	0.04	-15.22	1.18	0.98	0.36	-14.24	1.31	-0.28	0.2	-0.4
	50	51	GLU	286	0	0	0	0	0	0	-1.93	0.5	-1.36	0.25	-3.28	0.58	-28.44	2.29	-3.73	0.39	-32.18	2.27	-30.37	2.45	-5.09	0.52	-35.46	2.51	30.4	2.47	4.15	0.57	34.55	2.39	-0.36	0.05	-0.06	0.02	-0.42	0.05	30.04	2.45	4.09	0.55	34.13	2.37	-0.33	0.66	-1
	51	52	ALA	287	0	0	0	0	0	0	-0.1	0.06	-0.4	0.17	-0.5	0.22	-0.15	0.02	-0.1	0.18	-0.26	0.19	-0.25	0.07	-0.51	0.23	-0.76	0.28	0.14	0.02	0.2	0.19	0.35	0.19	0	0	-0.01	0.01	-0.01	0.01	0.14	0.02	0.19	0.19	0.34	0.19	-0.11	0.06	-0.31
	52	53	ALA	288	0	0	0	0	0	0	-0.03	0.01	-0.11	0.03	-0.14	0.04	-0.07	0.02	0.63	0.17	0.56	0.17	-0.1	0.02	0.52	0.16	0.42	0.15	0.06	0.02	-0.57	0.17	-0.51	0.17	0	0.01	0	0	0	0.01	0.06	0.02	-0.57	0.17	-0.51	0.17	-0.04	0.02	-0.05
	53	54	VAL	289	0	0	0	0	0	0	-1.36	0.27	-0.34	0.08	-1.7	0.31	2.81	0.15	-1.09	0.29	1.72	0.3	1.45	0.26	-1.44	0.34	0.02	0.44	-2.68	0.11	1.17	0.33	-1.51	0.3	-0.29	0.04	0	0	-0.29	0.04	-2.97	0.13	1.17	0.33	-1.79	0.29	-1.51	0.29	-0.26
	54	55	MET	290	0	0	0	0	0	0	-1.37	0.35	-0.41	0.14	-1.77	0.42	0.9	0.35	-0.39	0.22	0.51	0.4	-0.47	0.4	-0.8	0.32	-1.26	0.56	-0.61	0.34	0.42	0.21	-0.19	0.38	-0.21	0.04	0	0.01	-0.22	0.04	-0.82	0.33	0.42	0.2	-0.4	0.37	-1.29	0.39	-0.38
	55	56	LYS	291	0	0	0	0	0	0	-0.02	0	-0.04	0.01	-0.06	0.01	12.49	0.47	0.19	0.09	12.68	0.5	12.46	0.47	0.15	0.09	12.62	0.49	-12.25	0.45	-0.13	0.09	-12.38	0.47	0	0	0	0	0	0	-12.25	0.45	-0.13	0.09	-12.38	0.47	0.21	0.02	0.03
	56	57	GLU	292	0	0	0	0	0	0	-0.03	0.01	-0.02	0.01	-0.05	0.01	-12.77	0.67	-1.12	0.15	-13.89	0.72	-12.8	0.68	-1.14	0.15	-13.94	0.73	12.71	0.68	1.13	0.15	13.85	0.72	0	0	0	0	0	0	12.71	0.68	1.13	0.15	13.85	0.72	-0.09	0.01	-0.01
	57	58	ILE	293	0	0	0	0	0	0	-0.42	0.17	-0.04	0.01	-0.46	0.18	1.59	0.12	-1.62	0.2	-0.03	0.19	1.17	0.1	-1.66	0.21	-0.49	0.24	-1.56	0.12	1.66	0.21	0.09	0.2	-0.09	0.04	0	0	-0.09	0.04	-1.65	0.16	1.66	0.21	0	0.2	-0.49	0.21	0
	58	59	LYS	294	0	0	0	0	0	0	-0.01	0	-0.01	0	-0.02	0	10.13	0.57	-0.18	0.09	9.94	0.57	10.12	0.57	-0.19	0.09	9.93	0.57	-9.97	0.56	0.21	0.09	-9.76	0.56	0	0	0	0	0	0	-9.97	0.56	0.21	0.09	-9.76	0.56	0.15	0.01	0.01
	59	60	HIS	295	0	0	0	0	0	0	-0.01	0	-0.01	0	-0.01	0	0.07	0.07	-0.81	0.07	-0.74	0.11	0.06	0.07	-0.82	0.07	-0.75	0.11	-0.07	0.07	0.81	0.07	0.74	0.11	0	0	0	0	0	0	-0.07	0.07	0.81	0.07	0.74	0.11	-0.01	0	-0.01
	60	61	PRO	296	0	0	0	0	0	0	0	0	0	0	-0.01	0	1.85	0.06	-1.93	0.09	-0.07	0.06	1.85	0.06	-1.93	0.09	-0.08	0.06	-1.83	0.06	1.91	0.09	0.08	0.05	0	0	0	0	0	0	-1.83	0.06	1.91	0.09	0.08	0.05	0.02	0	-0.03
	61	62	ASN	297	0	0	0	0	0	0	0	0	-0.01	0	-0.01	0	0.04	0.04	-0.12	0.05	-0.07	0.07	0.04	0.04	-0.12	0.05	-0.08	0.07	-0.03	0.04	0.11	0.05	0.08	0.07	0	0	0	0	0	0	-0.03	0.04	0.11	0.05	0.08	0.07	0.01	0	-0.01
	62	63	LEU	298	0	0	0	0	0	0	-0.11	0.05	-0.03	0	-0.14	0.05	1.23	0.09	-0.41	0.07	0.82	0.11	1.12	0.06	-0.44	0.07	0.69	0.1	-1.22	0.08	0.36	0.07	-0.86	0.11	-0.02	0.03	0	0	-0.02	0.03	-1.24	0.1	0.36	0.07	-0.88	0.12	-0.12	0.07	-0.08
	63	64	VAL	299	0	0	0	0	0	0	-0.61	0.11	-0.11	0.02	-0.72	0.13	1.5	0.11	-2.34	0.2	-0.84	0.2	0.88	0.17	-2.45	0.22	-1.56	0.28	-1.53	0.1	2.35	0.21	0.82	0.2	-0.05	0.01	0	0	-0.05	0.01	-1.58	0.11	2.35	0.21	0.77	0.2	-0.69	0.13	-0.1
	64	65	GLN	300	0	0	0	0	0	0	-0.02	0	-0.09	0.02	-0.12	0.02	0.56	0.07	-0.5	0.17	0.06	0.17	0.54	0.07	-0.59	0.18	-0.05	0.18	-0.51	0.07	0.56	0.18	0.05	0.18	0	0	0	0	0	0	-0.51	0.07	0.56	0.18	0.05	0.18	0.03	0.01	-0.03
	65	66	LEU	301	0	0	0	0	0	0	-0.15	0.04	-0.06	0.01	-0.21	0.05	1.12	0.06	-0.77	0.07	0.35	0.08	0.97	0.05	-0.83	0.08	0.15	0.08	-1.1	0.06	0.77	0.08	-0.33	0.09	0	0	0	0	0	0	-1.11	0.06	0.77	0.08	-0.33	0.09	-0.13	0.04	-0.05
	66	67	LEU	302	0	0	0	0	0	0	-0.03	0	-0.02	0	-0.05	0	0.73	0.03	-0.55	0.05	0.18	0.06	0.7	0.03	-0.57	0.05	0.13	0.06	-0.73	0.03	0.58	0.05	-0.15	0.06	0	0	0	0	0	0	-0.73	0.03	0.58	0.05	-0.15	0.06	-0.03	0.01	0.01
	67	68	GLY	303	0	0	0	0	0	0	0	0	-0.02	0	-0.02	0	0	0	-0.24	0.07	-0.24	0.07	0	0	-0.26	0.07	-0.26	0.07	0	0	0.26	0.07	0.26	0.07	0	0	0	0	0	0	0	0	0.26	0.07	0.26	0.07	0	0	0
	68	69	VAL	304	0	0	0	0	0	0	-0.02	0	-0.01	0	-0.04	0.01	1.17	0.05	-0.97	0.05	0.21	0.06	1.15	0.04	-0.98	0.05	0.17	0.05	-1.16	0.04	0.96	0.05	-0.2	0.05	0	0	0	0	0	0	-1.16	0.04	0.96	0.05	-0.2	0.05	-0.01	0.01	-0.01
	69	70	CYS	305	0	0	0	0	0	0	0	0	-0.01	0	-0.01	0	-0.18	0.04	-0.05	0.05	-0.23	0.06	-0.18	0.04	-0.06	0.05	-0.24	0.06	0.17	0.03	0.07	0.05	0.24	0.06	0	0	0	0	0	0	0.17	0.03	0.07	0.05	0.24	0.06	-0.01	0	0.01
	70	71	THR	306	0	0	0	0	0	0	0	0	0	0	-0.01	0	0.63	0.07	-0.51	0.03	0.12	0.07	0.63	0.07	-0.52	0.03	0.11	0.07	-0.62	0.07	0.51	0.03	-0.11	0.07	0	0	0	0	0	0	-0.62	0.07	0.51	0.03	-0.11	0.07	0.01	0	0
	71	72	ARG	307	0	0	0	0	0	0	0	0	0	0	0	0	6.38	0.15	-0.21	0.03	6.17	0.15	6.38	0.15	-0.21	0.03	6.17	0.15	-6.3	0.15	0.21	0.03	-6.09	0.14	0	0	0	0	0	0	-6.3	0.15	0.21	0.03	-6.09	0.14	0.08	0	0
	72	73	GLU	308	0	0	0	0	0	0	0	0	0	0	0	0	-5.3	0.12	-1	0.05	-6.3	0.16	-5.3	0.12	-1	0.05	-6.3	0.16	5.24	0.12	0.99	0.05	6.23	0.16	0	0	0	0	0	0	5.24	0.12	0.99	0.05	6.23	0.16	-0.06	0	-0.01
	73	74	PRO	309	0	0	0	0	0	0	0	0	0	0	0	0	1.43	0.06	-1.23	0.03	0.2	0.04	1.43	0.06	-1.23	0.03	0.2	0.04	-1.41	0.06	1.22	0.03	-0.19	0.04	0	0	0	0	0	0	-1.41	0.06	1.22	0.03	-0.19	0.04	0.02	0	-0.01
	74	75	PRO	310	0	0	0	0	0	0	0	0	0	0	0	0	1.48	0.04	-1.33	0.03	0.15	0.03	1.48	0.04	-1.33	0.03	0.14	0.03	-1.46	0.04	1.32	0.03	-0.13	0.03	0	0	0	0	0	0	-1.46	0.04	1.32	0.03	-0.13	0.03	0.02	0	-0.01
	75	76	PHE	311	0	0	0	0	0	0	-0.01	0	-0.01	0	-0.01	0	0.19	0.02	-0.09	0.05	0.1	0.05	0.19	0.02	-0.1	0.05	0.09	0.05	-0.19	0.02	0.1	0.05	-0.09	0.05	0	0	0	0	0	0	-0.19	0.02	0.1	0.05	-0.09	0.05	0	0	0
	76	77	TYR	312	0	0	0	0	0	0	-0.02	0	-0.03	0	-0.04	0.01	0.2	0.02	-0.35	0.07	-0.16	0.07	0.18	0.02	-0.38	0.07	-0.2	0.07	-0.18	0.02	0.27	0.07	0.09	0.07	0	0	0	0	0	0	-0.18	0.02	0.27	0.07	0.09	0.07	0	0	-0.11
	77	78	ILE	313	0	0	0	0	0	0	-0.79	0.25	-0.26	0.06	-1.04	0.28	1.15	0.1	-0.66	0.17	0.48	0.21	0.36	0.24	-0.92	0.17	-0.56	0.3	-1.16	0.08	0.66	0.16	-0.5	0.17	-0.06	0.02	0	0	-0.06	0.02	-1.22	0.09	0.66	0.16	-0.57	0.18	-0.86	0.27	-0.26
	78	79	ILE	314	0	0	0	0	0	0	-0.04	0.01	-0.14	0.02	-0.18	0.03	0.83	0.03	-1.11	0.1	-0.27	0.09	0.8	0.03	-1.24	0.11	-0.45	0.1	-0.84	0.03	1.09	0.11	0.25	0.11	0	0	0	0	0	0	-0.84	0.03	1.09	0.11	0.25	0.11	-0.05	0.01	-0.15
	79	80	THR	315	0	0	0	0	0	0	-1.13	0.41	-0.3	0.04	-1.43	0.39	-1.55	0.72	-0.05	0.08	-1.6	0.71	-2.68	0.56	-0.35	0.09	-3.03	0.57	0.6	0.23	0.08	0.1	0.68	0.26	-0.15	0.02	0	0	-0.15	0.02	0.45	0.22	0.08	0.1	0.53	0.25	-2.23	0.54	-0.27
	80	81	GLU	316	0	0	0	0	0	0	-0.13	0.04	-0.25	0.24	-0.38	0.25	-9.1	0.4	-2.28	0.31	-11.38	0.53	-9.23	0.41	-2.53	0.29	-11.76	0.53	8.98	0.4	2.86	0.27	11.85	0.52	0	0	-0.02	0.01	-0.02	0.01	8.98	0.4	2.85	0.27	11.83	0.52	-0.25	0.05	0.32
	81	82	PHE	317	0	0	0	0	0	0	-0.39	0.12	-0.35	0.13	-0.74	0.19	0.17	0.05	-0.49	0.13	-0.33	0.13	-0.22	0.12	-0.84	0.17	-1.07	0.22	-0.05	0.04	0.52	0.12	0.47	0.13	-0.02	0.01	0	0	-0.02	0.01	-0.07	0.04	0.52	0.12	0.45	0.13	-0.29	0.09	-0.33
	82	83	MET	318	0	0	0	0	0	0	-0.32	0.11	-0.4	0.11	-0.72	0.19	0.18	0.09	-0.33	0.12	-0.15	0.16	-0.14	0.14	-0.74	0.12	-0.87	0.2	-0.16	0.11	0.56	0.1	0.4	0.16	0	0.01	-0.04	0.01	-0.04	0.01	-0.16	0.11	0.52	0.1	0.36	0.16	-0.3	0.12	-0.22
	83	84	THR	319	0	0	0	0	0	0	-0.01	0	-0.04	0.01	-0.05	0.01	0.26	0.04	-0.24	0.02	0.02	0.05	0.25	0.04	-0.28	0.02	-0.03	0.05	-0.25	0.04	0.27	0.01	0.02	0.04	0	0	0	0	0	0	-0.25	0.04	0.27	0.01	0.02	0.04	0	0.01	-0.01
	84	85	TYR	320	0	0	0	0	0	0	-0.01	0	-0.02	0.01	-0.03	0.01	0.16	0.01	-0.18	0.02	-0.02	0.03	0.16	0.01	-0.21	0.02	-0.05	0.03	-0.16	0.01	0.18	0.02	0.03	0.03	0	0	0	0	0	0	-0.16	0.01	0.18	0.02	0.03	0.03	0	0	-0.02
	85	86	GLY	321	0	0	0	0	0	0	0	0	-0.12	0.05	-0.12	0.05	0	0	-0.1	0.05	-0.1	0.05	0	0	-0.22	0.08	-0.22	0.08	0	0	0.09	0.05	0.09	0.05	0	0	-0.01	0.01	-0.01	0.01	0	0	0.07	0.05	0.07	0.05	0	0	-0.15
	86	87	ASN	322	0	0	0	0	0	0	-0.03	0.01	-0.04	0.01	-0.07	0.02	-0.06	0.07	0.37	0.03	0.31	0.08	-0.09	0.07	0.33	0.03	0.24	0.08	0.02	0.07	-0.38	0.03	-0.36	0.08	0	0	0	0	0	0	0.02	0.07	-0.38	0.03	-0.36	0.08	-0.06	0.02	-0.05
	87	88	LEU	323	0	0	0	0	0	0	-0.01	0	-0.01	0	-0.01	0	0.66	0.02	-0.32	0.01	0.34	0.02	0.65	0.02	-0.32	0.01	0.33	0.02	-0.65	0.02	0.33	0.02	-0.32	0.02	0	0	0	0	0	0	-0.65	0.02	0.33	0.02	-0.32	0.02	0	0	0.01
	88	89	LEU	324	0	0	0	0	0	0	0	0	0	0	-0.01	0	0.62	0.02	-0.35	0.02	0.27	0.02	0.62	0.02	-0.35	0.02	0.27	0.02	-0.61	0.02	0.35	0.02	-0.26	0.02	0	0	0	0	0	0	-0.61	0.02	0.35	0.02	-0.26	0.02	0.01	0	0
	89	90	ASP	325	0	0	0	0	0	0	0	0	0	0	-0.01	0	-5.63	0.16	-0.83	0.02	-6.46	0.17	-5.63	0.16	-0.83	0.02	-6.46	0.17	5.58	0.16	0.82	0.02	6.4	0.17	0	0	0	0	0	0	5.58	0.16	0.82	0.02	6.4	0.17	-0.05	0	-0.01
	90	91	TYR	326	0	0	0	0	0	0	0	0	0	0	-0.01	0	0.17	0.01	0	0.01	0.17	0.02	0.16	0.01	0	0.01	0.16	0.02	-0.16	0.01	0	0.01	-0.16	0.02	0	0	0	0	0	0	-0.16	0.01	0	0.01	-0.16	0.02	0	0	0
	91	92	LEU	327	0	0	0	0	0	0	0	0	0	0	0	0	0.52	0.01	-0.31	0.01	0.21	0.01	0.52	0.01	-0.31	0.01	0.2	0.01	-0.51	0.01	0.31	0.01	-0.2	0.01	0	0	0	0	0	0	-0.51	0.01	0.31	0.01	-0.2	0.01	0.01	0	0
	92	93	ARG	328	0	0	0	0	0	0	0	0	0	0	0	0	7.14	0.19	-0.11	0.01	7.03	0.19	7.14	0.19	-0.11	0.01	7.03	0.19	-7.04	0.19	0.11	0.01	-6.93	0.19	0	0	0	0	0	0	-7.04	0.19	0.11	0.01	-6.93	0.19	0.1	0	0
	93	94	GLU	329	0	0	0	0	0	0	0	0	0	0	0	0	-4.8	0.18	-0.56	0.02	-5.36	0.18	-4.8	0.18	-0.56	0.02	-5.36	0.18	4.75	0.19	0.56	0.02	5.3	0.18	0	0	0	0	0	0	4.75	0.19	0.56	0.02	5.3	0.18	-0.05	0	-0.01
	94	95	CYS	330	0	0	0	0	0	0	0	0	0	0	0	0	-0.1	0.03	0.16	0.02	0.05	0.04	-0.1	0.03	0.16	0.02	0.05	0.04	0.1	0.03	-0.15	0.02	-0.05	0.04	0	0	0	0	0	0	0.1	0.03	-0.15	0.02	-0.05	0.04	0	0	0
	95	96	ASN	331	0	0	0	0	0	0	0	0	0	0	0	0	-0.02	0.02	-0.04	0.02	-0.06	0.03	-0.02	0.02	-0.04	0.02	-0.06	0.03	0.02	0.02	0.04	0.02	0.06	0.03	0	0	0	0	0	0	0.02	0.02	0.04	0.02	0.06	0.03	0	0	0
	96	97	ARG	332	0	0	0	0	0	0	0	0	0	0	0	0	5.33	0.12	-0.18	0.02	5.15	0.12	5.33	0.12	-0.18	0.02	5.15	0.12	-5.27	0.12	0.18	0.02	-5.08	0.12	0	0	0	0	0	0	-5.27	0.12	0.18	0.02	-5.08	0.12	0.07	0	0
	97	98	GLN	333	0	0	0	0	0	0	0	0	0	0	0	0	0.14	0.04	-0.14	0.02	0	0.05	0.14	0.04	-0.14	0.02	0	0.05	-0.14	0.04	0.14	0.02	0	0.05	0	0	0	0	0	0	-0.14	0.04	0.14	0.02	0	0.05	0	0	0
	98	99	GLU	334	0	0	0	0	0	0	0	0	0	0	0	0	-4.44	0.17	-0.59	0.03	-5.03	0.18	-4.44	0.17	-0.59	0.03	-5.03	0.18	4.39	0.17	0.58	0.03	4.97	0.18	0	0	0	0	0	0	4.39	0.17	0.58	0.03	4.97	0.18	-0.05	0	-0.01
	99	100	VAL	335	0	0	0	0	0	0	0	0	0	0	0	0	0.58	0.01	-0.5	0.04	0.08	0.04	0.58	0.01	-0.5	0.04	0.08	0.04	-0.57	0.01	0.49	0.04	-0.08	0.04	0	0	0	0	0	0	-0.57	0.01	0.49	0.04	-0.08	0.04	0.01	0	-0.01
	100	101	ASN	336	0	0	0	0	0	0	0	0	0	0	0	0	-0.11	0.04	-0.09	0.02	-0.19	0.05	-0.11	0.04	-0.09	0.02	-0.19	0.05	0.1	0.04	0.08	0.02	0.19	0.05	0	0	0	0	0	0	0.1	0.04	0.08	0.02	0.19	0.05	0	0	0
	101	102	ALA	337	0	0	0	0	0	0	0	0	0	0	0	0	-0.02	0	-0.11	0.01	-0.12	0.01	-0.02	0	-0.11	0.01	-0.12	0.01	0.02	0	0.11	0.01	0.12	0.01	0	0	0	0	0	0	0.02	0	0.11	0.01	0.12	0.01	0	0	0
	102	103	VAL	338	0	0	0	0	0	0	0	0	0	0	0	0	0.56	0.01	-0.69	0.02	-0.13	0.01	0.56	0.01	-0.69	0.02	-0.13	0.01	-0.55	0.01	0.68	0.02	0.13	0.01	0	0	0	0	0	0	-0.55	0.01	0.68	0.02	0.13	0.01	0.01	0	-0.01
	103	104	VAL	339	0	0	0	0	0	0	0	0	0	0	0	0	0.61	0.01	-0.77	0.02	-0.15	0.01	0.61	0.01	-0.77	0.02	-0.16	0.01	-0.6	0.01	0.76	0.02	0.15	0.01	0	0	0	0	0	0	-0.6	0.01	0.76	0.02	0.15	0.01	0.01	0	-0.01
	104	105	LEU	340	0	0	0	0	0	0	0	0	0	0	0	0	0.45	0.01	-0.66	0.02	-0.2	0.02	0.45	0.01	-0.66	0.02	-0.21	0.02	-0.45	0.01	0.65	0.02	0.2	0.02	0	0	0	0	0	0	-0.45	0.01	0.65	0.02	0.2	0.02	0.01	0	-0.01
	105	106	LEU	341	0	0	0	0	0	0	0	0	0	0	0	0	0.44	0.01	-0.65	0.02	-0.21	0.02	0.44	0.01	-0.65	0.02	-0.21	0.02	-0.44	0.01	0.64	0.02	0.2	0.02	0	0	0	0	0	0	-0.44	0.01	0.64	0.02	0.2	0.02	0.01	0	-0.01
	106	107	TYR	342	0	0	0	0	0	0	0	0	0	0	0	0	0.14	0.02	-0.37	0.02	-0.24	0.03	0.14	0.02	-0.37	0.02	-0.24	0.03	-0.13	0.02	0.37	0.02	0.24	0.03	0	0	0	0	0	0	-0.13	0.02	0.37	0.02	0.24	0.03	0	0	0
	107	108	MET	343	0	0	0	0	0	0	0	0	0	0	0	0	0.35	0.04	-0.64	0.03	-0.29	0.05	0.35	0.04	-0.64	0.03	-0.29	0.05	-0.35	0.04	0.63	0.03	0.29	0.04	0	0	0	0	0	0	-0.35	0.04	0.63	0.03	0.29	0.04	0	0	-0.01
	108	109	ALA	344	0	0	0	0	0	0	0	0	0	0	0	0	-0.03	0	-0.25	0.03	-0.28	0.03	-0.03	0	-0.25	0.03	-0.28	0.03	0.03	0	0.25	0.03	0.28	0.03	0	0	0	0	0	0	0.03	0	0.25	0.03	0.28	0.03	0	0	0
	109	110	THR	345	0	0	0	0	0	0	0	0	0	0	0	0	0.46	0.03	-0.62	0.04	-0.16	0.04	0.46	0.03	-0.62	0.04	-0.16	0.04	-0.45	0.03	0.61	0.04	0.16	0.04	0	0	0	0	0	0	-0.45	0.03	0.61	0.04	0.16	0.04	0.01	0	-0.01
	110	111	GLN	346	0	0	0	0	0	0	0	0	0	0	0	0	0.15	0.04	-0.54	0.05	-0.39	0.06	0.15	0.04	-0.54	0.05	-0.39	0.06	-0.15	0.04	0.54	0.05	0.39	0.06	0	0	0	0	0	0	-0.15	0.04	0.54	0.05	0.39	0.06	0.01	0	0
	111	112	ILE	347	0	0	0	0	0	0	0	0	0	0	-0.01	0	0.91	0.03	-1.3	0.08	-0.39	0.06	0.91	0.03	-1.3	0.08	-0.39	0.06	-0.9	0.03	1.29	0.08	0.38	0.06	0	0	0	0	0	0	-0.9	0.03	1.29	0.08	0.38	0.06	0.01	0	-0.02
	112	113	SER	348	0	0	0	0	0	0	0	0	0	0	0	0	0.6	0.06	-0.81	0.06	-0.21	0.08	0.6	0.06	-0.82	0.06	-0.21	0.08	-0.59	0.06	0.81	0.06	0.21	0.08	0	0	0	0	0	0	-0.59	0.06	0.81	0.06	0.21	0.08	0.01	0	-0.01
	113	114	SER	349	0	0	0	0	0	0	0	0	0	0	0	0	0.6	0.11	-0.66	0.05	-0.06	0.11	0.6	0.11	-0.66	0.05	-0.07	0.11	-0.58	0.1	0.66	0.05	0.08	0.11	0	0	0	0	0	0	-0.58	0.1	0.66	0.05	0.08	0.11	0.01	0	0
	114	115	ALA	350	0	0	0	0	0	0	0	0	-0.01	0	-0.01	0	0	0.01	-0.3	0.12	-0.3	0.12	0	0.01	-0.31	0.12	-0.31	0.12	0	0.01	0.31	0.12	0.3	0.12	0	0	0	0	0	0	0	0.01	0.31	0.12	0.3	0.12	0	0	0
	115	116	MET	351	0	0	0	0	0	0	-0.02	0.01	-0.01	0	-0.03	0.01	0.24	0.08	-0.9	0.08	-0.66	0.11	0.22	0.08	-0.91	0.08	-0.69	0.12	-0.23	0.08	0.89	0.08	0.66	0.11	0	0	0	0	0	0	-0.23	0.08	0.89	0.08	0.66	0.11	-0.01	0.01	-0.02
	116	117	GLU	352	0	0	0	0	0	0	0	0	0	0	0	0	-7.8	0.28	-1.42	0.08	-9.22	0.35	-7.8	0.29	-1.43	0.08	-9.23	0.35	7.71	0.28	1.41	0.08	9.12	0.34	0	0	0	0	0	0	7.71	0.28	1.41	0.08	9.12	0.34	-0.09	0	-0.02
	117	118	TYR	353	0	0	0	0	0	0	-0.02	0	-0.01	0	-0.02	0.01	0.1	0.04	-0.23	0.06	-0.14	0.07	0.08	0.04	-0.24	0.06	-0.16	0.07	-0.09	0.04	0.23	0.06	0.15	0.07	0	0	0	0	0	0	-0.09	0.04	0.23	0.06	0.15	0.07	0	0	0
	118	119	LEU	354	0	0	0	0	0	0	-0.22	0.1	-0.02	0.01	-0.24	0.11	1.41	0.12	-1.12	0.1	0.29	0.13	1.19	0.08	-1.14	0.1	0.05	0.13	-1.38	0.11	1.11	0.1	-0.28	0.13	-0.04	0.02	0	0	-0.04	0.02	-1.42	0.13	1.11	0.1	-0.32	0.13	-0.23	0.11	-0.03
	119	120	GLU	355	0	0	0	0	0	0	0	0	-0.01	0	-0.01	0	-8.58	0.34	-1.57	0.1	-10.15	0.41	-8.59	0.34	-1.57	0.1	-10.16	0.41	8.49	0.34	1.56	0.1	10.05	0.4	0	0	0	0	0	0	8.49	0.34	1.56	0.1	10.05	0.4	-0.1	0	-0.01
	120	121	LYS	356	0	0	0	0	0	0	0	0	0	0	0	0	9.02	0.4	0	0.05	9.02	0.42	9.02	0.4	0	0.05	9.02	0.42	-8.9	0.4	0.01	0.05	-8.89	0.41	0	0	0	0	0	0	-8.9	0.4	0.01	0.05	-8.89	0.41	0.12	0.01	0.01
	121	122	LYS	357	0	0	0	0	0	0	-0.01	0	-0.01	0	-0.02	0.01	11.41	0.98	-0.44	0.11	10.96	0.96	11.4	0.97	-0.45	0.11	10.95	0.96	-11.24	0.95	0.46	0.11	-10.77	0.94	0	0	0	0	0	0	-11.24	0.95	0.46	0.11	-10.77	0.94	0.16	0.02	0.01
	122	123	ASN	358	0	0	0	0	0	0	-0.01	0	-0.02	0.01	-0.02	0.01	-0.37	0.25	-0.09	0.12	-0.46	0.28	-0.38	0.25	-0.11	0.12	-0.48	0.28	0.39	0.25	0.12	0.13	0.5	0.28	0	0	0	0	0	0	0.39	0.25	0.12	0.13	0.5	0.28	0.01	0	0.01
	123	124	PHE	359	0	0	0	0	0	0	-0.37	0.16	-0.09	0.04	-0.46	0.19	0.37	0.11	0.94	0.23	1.31	0.27	0	0.19	0.85	0.22	0.85	0.27	-0.22	0.11	-0.89	0.2	-1.11	0.23	-0.04	0.03	0	0	-0.04	0.03	-0.26	0.11	-0.89	0.2	-1.15	0.23	-0.26	0.14	-0.04
	124	125	ILE	360	0	0	0	0	0	0	-0.17	0.11	-0.19	0.43	-0.36	0.43	1.83	0.13	-6.13	1.05	-4.3	0.98	1.67	0.1	-6.32	0.92	-4.66	0.87	-1.82	0.13	5.49	0.68	3.67	0.6	-0.02	0.03	-0.1	0.02	-0.12	0.04	-1.84	0.15	5.39	0.67	3.55	0.58	-0.17	0.15	-0.94
	125	126	HIS	361	0	0	0	0	0	0	-0.29	0.08	-0.56	0.2	-0.86	0.26	-0.31	0.65	-3.37	0.99	-3.68	1.33	-0.6	0.69	-3.94	1.08	-4.54	1.47	0.44	0.65	3.67	0.84	4.11	1.25	-0.02	0.01	-0.1	0.03	-0.12	0.03	0.42	0.65	3.57	0.83	3.99	1.23	-0.18	0.11	-0.37
	126	127	ARG	362	0	0	0	0	0	0	-0.53	0.33	-0.09	0.05	-0.63	0.34	23.53	2.71	-0.96	0.27	22.57	2.77	23	2.61	-1.06	0.31	21.94	2.69	-22.55	2.15	0.95	0.26	-21.6	2.2	-0.18	0.09	0	0	-0.18	0.09	-22.73	2.2	0.95	0.26	-21.78	2.25	0.26	0.73	-0.11
	127	128	ASP	363	0	0	0	0	0	0	-0.04	0.01	-0.04	0.01	-0.08	0.03	-14.74	0.96	-2.32	0.31	-17.06	1.12	-14.78	0.97	-2.36	0.32	-17.14	1.14	14.63	0.97	2.28	0.31	16.92	1.12	0	0	0	0	0	0	14.63	0.96	2.28	0.31	16.92	1.12	-0.15	0.02	-0.08
	128	129	LEU	364	0	0	0	0	0	0	-0.02	0	-0.01	0	-0.03	0.01	1.13	0.06	-0.79	0.11	0.34	0.11	1.11	0.06	-0.8	0.11	0.31	0.11	-1.12	0.06	0.8	0.12	-0.32	0.12	0	0	0	0	0	0	-1.12	0.06	0.8	0.12	-0.32	0.12	0	0	0
	129	130	ALA	365	0	0	0	0	0	0	0	0	-0.01	0	-0.01	0	-0.03	0.01	-0.43	0.06	-0.45	0.06	-0.03	0.01	-0.43	0.06	-0.46	0.06	0.03	0.01	0.42	0.05	0.45	0.06	0	0	0	0	0	0	0.03	0.01	0.42	0.05	0.45	0.06	0	0	-0.01
	130	131	ALA	366	0	0	0	0	0	0	0	0	-0.01	0	-0.01	0	-0.05	0	-0.04	0.06	-0.09	0.06	-0.05	0	-0.04	0.06	-0.1	0.06	0.05	0	0.03	0.06	0.08	0.06	0	0	0	0	0	0	0.05	0	0.03	0.06	0.08	0.06	0	0	-0.01
	131	132	ARG	367	0	0	0	0	0	0	-0.01	0	-0.02	0	-0.03	0	12.46	0.73	-0.28	0.12	12.18	0.74	12.45	0.73	-0.3	0.12	12.15	0.74	-12.27	0.72	0.3	0.12	-11.97	0.73	0	0	0	0	0	0	-12.27	0.72	0.3	0.12	-11.97	0.73	0.18	0.01	0
	132	133	ASN	368	0	0	0	0	0	0	-0.04	0.01	-0.04	0.01	-0.08	0.01	0.2	0.38	-0.5	0.1	-0.3	0.37	0.16	0.38	-0.53	0.1	-0.37	0.37	-0.14	0.37	0.46	0.09	0.32	0.36	0	0	0	0	0	0	-0.14	0.37	0.46	0.09	0.32	0.36	0.02	0.02	-0.07
	133	134	CYS	369	0	0	0	0	0	0	-0.01	0	-0.03	0	-0.04	0.01	-0.32	0.08	0.31	0.05	-0.01	0.08	-0.33	0.08	0.28	0.05	-0.05	0.08	0.33	0.08	-0.32	0.05	0.01	0.08	0	0	0	0	0	0	0.33	0.08	-0.32	0.05	0.01	0.08	0	0	-0.04
	134	135	LEU	370	0	0	0	0	0	0	-1.14	0.18	-0.05	0.01	-1.19	0.18	0.64	0.05	-0.89	0.04	-0.25	0.05	-0.49	0.19	-0.94	0.04	-1.44	0.19	-0.59	0.05	0.88	0.04	0.3	0.05	-0.11	0.02	0	0	-0.11	0.02	-0.7	0.05	0.88	0.04	0.19	0.05	-1.19	0.18	-0.06
	135	136	VAL	371	0	0	0	0	0	0	-0.01	0	-0.03	0	-0.04	0.01	0.78	0.03	-0.79	0.04	-0.01	0.03	0.78	0.03	-0.82	0.04	-0.04	0.03	-0.79	0.03	0.82	0.04	0.03	0.03	0	0	0	0	0	0	-0.79	0.03	0.82	0.04	0.03	0.03	-0.01	0	0
	136	137	GLY	372	0	0	0	0	0	0	0	0	-0.01	0	-0.01	0	0	0	0.04	0.03	0.04	0.03	0	0	0.03	0.03	0.03	0.03	0	0	-0.02	0.03	-0.02	0.03	0	0	0	0	0	0	0	0	-0.02	0.03	-0.02	0.03	0	0	0.01
	137	138	GLU	373	0	0	0	0	0	0	0	0	0	0	0	0	-5.01	0.23	-0.92	0.03	-5.93	0.24	-5.01	0.23	-0.92	0.03	-5.93	0.24	4.96	0.23	0.91	0.03	5.87	0.24	0	0	0	0	0	0	4.96	0.23	0.91	0.03	5.87	0.24	-0.05	0	-0.01
	138	139	ASN	374	0	0	0	0	0	0	0	0	0	0	0	0	0.01	0.06	-0.07	0.02	-0.06	0.06	0.01	0.06	-0.07	0.02	-0.06	0.06	-0.01	0.05	0.07	0.02	0.06	0.06	0	0	0	0	0	0	-0.01	0.05	0.07	0.02	0.06	0.06	0	0	0
	139	140	HIS	375	0	0	0	0	0	0	0	0	0	0	0	0	0.22	0.02	-0.31	0.02	-0.09	0.04	0.22	0.02	-0.31	0.02	-0.09	0.04	-0.21	0.02	0.31	0.02	0.1	0.04	0	0	0	0	0	0	-0.21	0.02	0.31	0.02	0.1	0.04	0	0	0
	140	141	LEU	376	0	0	0	0	0	0	-0.01	0	0	0	-0.01	0	0.56	0.02	-0.48	0.03	0.08	0.03	0.55	0.02	-0.48	0.03	0.07	0.03	-0.55	0.02	0.47	0.03	-0.08	0.03	0	0	0	0	0	0	-0.55	0.02	0.47	0.03	-0.08	0.03	0	0	-0.01
	141	142	VAL	377	0	0	0	0	0	0	0	0	-0.01	0	-0.01	0	0.92	0.03	-0.86	0.04	0.06	0.03	0.91	0.03	-0.87	0.04	0.05	0.03	-0.91	0.03	0.84	0.04	-0.07	0.03	0	0	0	0	0	0	-0.91	0.03	0.84	0.04	-0.07	0.03	0.01	0	-0.02
	142	143	LYS	378	0	0	0	0	0	0	-0.04	0.01	-0.02	0	-0.06	0.01	10.14	0.43	0.06	0.06	10.21	0.44	10.11	0.42	0.04	0.06	10.15	0.44	-9.94	0.41	-0.06	0.06	-9.99	0.44	0	0	0	0	0	0	-9.94	0.41	-0.06	0.06	-9.99	0.44	0.17	0.02	-0.02
	143	144	VAL	379	0	0	0	0	0	0	-0.03	0.01	-0.05	0.01	-0.09	0.01	1.63	0.08	-1.43	0.2	0.21	0.2	1.6	0.08	-1.48	0.2	0.12	0.2	-1.63	0.08	1.38	0.2	-0.25	0.19	0	0	0	0	0	0	-1.63	0.08	1.38	0.2	-0.25	0.19	-0.03	0.01	-0.1
	144	145	ALA	380	0	0	0	0	0	0	-0.17	0.05	-0.21	0.03	-0.38	0.08	-0.19	0.03	-0.26	0.28	-0.45	0.28	-0.36	0.07	-0.47	0.28	-0.83	0.29	0.23	0.03	0.09	0.27	0.31	0.27	0	0	0	0.01	-0.01	0.01	0.22	0.03	0.08	0.27	0.31	0.27	-0.13	0.05	-0.39
	145	146	ASP	381	0	0	0	0	0	0	-1.03	0.31	-0.91	0.39	-1.94	0.51	-29.74	2.8	-6.45	1.94	-36.19	3.27	-30.77	2.96	-7.36	1.78	-38.13	3.38	31.26	3.02	5.81	0.77	37.07	3.05	-0.26	0.04	-0.13	0.02	-0.39	0.05	31	2.99	5.68	0.76	36.68	3.03	0.23	0.42	-1.68
	146	147	PHE	382	0	0	0	0	0	0	-0.99	0.36	-0.52	0.2	-1.51	0.46	-0.37	0.2	0.2	0.28	-0.17	0.37	-1.35	0.33	-0.32	0.38	-1.67	0.54	0.79	0.16	0.11	0.26	0.9	0.29	-0.1	0.02	-0.01	0.01	-0.11	0.03	0.69	0.15	0.11	0.26	0.79	0.29	-0.67	0.37	-0.22
	147	148	GLY	383	0	0	0	0	0	0	0	0	-0.1	0.02	-0.1	0.02	0	0	1.01	0.21	1.01	0.21	0	0	0.91	0.21	0.91	0.21	0	0	-0.91	0.23	-0.91	0.23	0	0	0	0	0	0	0	0	-0.91	0.23	-0.91	0.23	0	0	0
	148	149	LEU	384	0	0	0	0	0	0	-0.03	0.01	-0.02	0	-0.05	0.01	0.99	0.05	-0.44	0.07	0.55	0.09	0.96	0.05	-0.46	0.07	0.5	0.09	-0.99	0.05	0.46	0.07	-0.53	0.09	0	0	0	0	0	0	-0.99	0.05	0.46	0.07	-0.53	0.09	-0.03	0.01	0
	149	150	SER	385	0	0	0	0	0	0	-0.01	0	-0.01	0	-0.02	0	0.94	0.21	-0.06	0.08	0.89	0.23	0.93	0.21	-0.07	0.08	0.87	0.22	-0.89	0.2	0.08	0.08	-0.81	0.22	0	0	0	0	0	0	-0.89	0.2	0.08	0.08	-0.81	0.22	0.04	0.01	0.02
	150	151	ARG	386	0	0	0	0	0	0	-0.08	0.08	-0.01	0	-0.09	0.08	16.99	2.18	-0.12	0.08	16.87	2.18	16.9	2.11	-0.13	0.08	16.77	2.11	-16.65	2.03	0.13	0.08	-16.52	2.03	-0.01	0.02	0	0	-0.01	0.02	-16.66	2.05	0.13	0.08	-16.53	2.05	0.24	0.08	0
	151	152	LEU	387	0	0	0	0	0	0	-0.01	0	0	0	-0.01	0	0.78	0.04	-0.42	0.04	0.36	0.05	0.77	0.04	-0.42	0.04	0.35	0.05	-0.77	0.04	0.42	0.04	-0.35	0.05	0	0	0	0	0	0	-0.77	0.04	0.42	0.04	-0.35	0.05	0	0	0
	152	153	MET	388	0	0	0	0	0	0	0	0	0	0	-0.01	0	0.49	0.13	-0.34	0.05	0.14	0.14	0.48	0.13	-0.35	0.05	0.14	0.14	-0.48	0.12	0.34	0.05	-0.14	0.14	0	0	0	0	0	0	-0.48	0.12	0.34	0.05	-0.14	0.14	0.01	0	0
	153	154	THR	389	0	0	0	0	0	0	0	0	0	0	0	0	0.33	0.09	-0.3	0.04	0.03	0.1	0.33	0.09	-0.3	0.04	0.02	0.1	-0.32	0.09	0.3	0.03	-0.02	0.1	0	0	0	0	0	0	-0.32	0.09	0.3	0.03	-0.02	0.1	0.01	0	0
	154	155	GLY	390	0	0	0	0	0	0	0	0	0	0	0	0	0	0	0.13	0.08	0.13	0.08	0	0	0.13	0.08	0.13	0.08	0	0	-0.13	0.08	-0.13	0.08	0	0	0	0	0	0	0	0	-0.13	0.08	-0.13	0.08	0	0	0
	155	156	ASP	391	0	0	0	0	0	0	0	0	0	0	0	0	-6.41	0.27	-0.97	0.08	-7.38	0.28	-6.41	0.27	-0.97	0.08	-7.38	0.28	6.34	0.27	0.96	0.07	7.3	0.28	0	0	0	0	0	0	6.34	0.27	0.96	0.07	7.3	0.28	-0.07	0	-0.01
	156	157	THR	392	0	0	0	0	0	0	0	0	0	0	0	0	0.5	0.09	-0.44	0.09	0.06	0.11	0.5	0.09	-0.44	0.09	0.06	0.11	-0.49	0.09	0.44	0.09	-0.05	0.11	0	0	0	0	0	0	-0.49	0.09	0.44	0.09	-0.05	0.11	0.01	0	0
	157	158	TYR	393	0	0	0	0	0	0	-0.01	0	0	0	-0.01	0	0.68	0.08	-0.11	0.07	0.57	0.11	0.67	0.08	-0.11	0.07	0.56	0.11	-0.68	0.08	0.11	0.07	-0.57	0.11	0	0	0	0	0	0	-0.68	0.08	0.11	0.07	-0.57	0.11	-0.01	0.01	0
	158	159	THR	394	0	0	0	0	0	0	0	0	0	0	0	0	0.4	0.06	-0.72	0.05	-0.32	0.08	0.4	0.06	-0.72	0.05	-0.32	0.08	-0.4	0.06	0.71	0.05	0.32	0.08	0	0	0	0	0	0	-0.4	0.06	0.71	0.05	0.32	0.08	0.01	0	-0.01
	159	160	ALA	395	0	0	0	0	0	0	0	0	0	0	0	0	-0.03	0	0.17	0.03	0.15	0.03	-0.03	0	0.17	0.03	0.15	0.03	0.03	0	-0.17	0.03	-0.14	0.03	0	0	0	0	0	0	0.03	0	-0.17	0.03	-0.14	0.03	0	0	0
	160	161	HIS	396	0	0	0	0	0	0	0	0	0	0	0	0	0.4	0.05	-0.53	0.03	-0.14	0.05	0.4	0.05	-0.53	0.03	-0.14	0.05	-0.39	0.05	0.53	0.03	0.14	0.05	0	0	0	0	0	0	-0.39	0.05	0.53	0.03	0.14	0.05	0.01	0	-0.01
	161	162	ALA	397	0	0	0	0	0	0	0	0	0	0	0	0	-0.01	0.01	-0.19	0.06	-0.2	0.06	-0.01	0.01	-0.19	0.06	-0.2	0.06	0.01	0.01	0.19	0.06	0.2	0.06	0	0	0	0	0	0	0.01	0.01	0.19	0.06	0.2	0.06	0	0	0
	162	163	GLY	398	0	0	0	0	0	0	0	0	0	0	0	0	0	0	-0.1	0.04	-0.1	0.04	0	0	-0.1	0.04	-0.1	0.04	0	0	0.1	0.04	0.1	0.04	0	0	0	0	0	0	0	0	0.1	0.04	0.1	0.04	0	0	0
	163	164	ALA	399	0	0	0	0	0	0	0	0	0	0	0	0	0.01	0.01	0.37	0.05	0.37	0.05	0	0.01	0.37	0.05	0.37	0.05	-0.01	0.01	-0.36	0.05	-0.36	0.05	0	0	0	0	0	0	-0.01	0.01	-0.36	0.05	-0.36	0.05	0	0	0.01
	164	165	LYS	400	0	0	0	0	0	0	0	0	0	0	-0.01	0	11.21	0.84	-0.63	0.08	10.58	0.82	11.21	0.84	-0.63	0.08	10.58	0.82	-11.04	0.82	0.63	0.08	-10.41	0.8	0	0	0	0	0	0	-11.04	0.82	0.63	0.08	-10.41	0.8	0.16	0.02	0
	165	166	PHE	401	0	0	0	0	0	0	0	0	0	0	-0.01	0	0.2	0.03	0.17	0.04	0.37	0.06	0.2	0.03	0.17	0.04	0.37	0.06	-0.19	0.03	-0.16	0.04	-0.36	0.06	0	0	0	0	0	0	-0.19	0.03	-0.16	0.04	-0.36	0.06	0	0	0.01
	166	167	PRO	402	0	0	0	0	0	0	0	0	0	0	0	0	2.53	0.15	-2.45	0.12	0.08	0.05	2.52	0.15	-2.45	0.13	0.07	0.05	-2.49	0.15	2.41	0.12	-0.08	0.05	0	0	0	0	0	0	-2.49	0.15	2.41	0.12	-0.08	0.05	0.03	0	-0.04
	167	168	ILE	403	0	0	0	0	0	0	0	0	0	0	0	0	0.74	0.03	-0.8	0.05	-0.06	0.04	0.74	0.03	-0.8	0.05	-0.06	0.04	-0.73	0.03	0.79	0.05	0.06	0.04	0	0	0	0	0	0	-0.73	0.03	0.79	0.05	0.06	0.04	0.01	0	-0.01
	168	169	LYS	404	0	0	0	0	0	0	0	0	0	0	0	0	7.16	0.27	-0.05	0.03	7.11	0.28	7.16	0.27	-0.05	0.03	7.11	0.28	-7.07	0.26	0.05	0.03	-7.01	0.27	0	0	0	0	0	0	-7.07	0.26	0.05	0.03	-7.01	0.27	0.09	0	0
	169	170	TRP	405	0	0	0	0	0	0	0	0	0	0	0	0	0.29	0.04	-0.36	0.1	-0.07	0.12	0.29	0.04	-0.36	0.1	-0.08	0.12	-0.29	0.04	0.36	0.1	0.08	0.12	0	0	0	0	0	0	-0.29	0.04	0.36	0.1	0.08	0.12	0	0	0
	170	171	THR	406	0	0	0	0	0	0	0	0	0	0	0	0	0.4	0.19	-0.16	0.04	0.24	0.21	0.4	0.19	-0.16	0.04	0.24	0.21	-0.39	0.19	0.16	0.04	-0.23	0.2	0	0	0	0	0	0	-0.39	0.19	0.16	0.04	-0.23	0.2	0.01	0	0
	171	172	ALA	407	0	0	0	0	0	0	0	0	0	0	0	0	0	0.01	-0.05	0.04	-0.05	0.04	0	0.01	-0.05	0.04	-0.05	0.04	0	0	0.05	0.04	0.05	0.04	0	0	0	0	0	0	0	0	0.05	0.04	0.05	0.04	0	0	0
	172	173	PRO	408	0	0	0	0	0	0	0	0	0	0	0	0	1.62	0.04	-1.68	0.05	-0.06	0.03	1.62	0.04	-1.68	0.05	-0.06	0.03	-1.6	0.04	1.66	0.05	0.06	0.03	0	0	0	0	0	0	-1.6	0.04	1.66	0.05	0.06	0.03	0.02	0	-0.02
	173	174	GLU	409	0	0	0	0	0	0	0	0	0	0	0	0	-8.29	0.27	-0.98	0.04	-9.27	0.28	-8.29	0.27	-0.98	0.04	-9.27	0.28	8.19	0.27	0.97	0.04	9.16	0.28	0	0	0	0	0	0	8.19	0.27	0.97	0.04	9.16	0.28	-0.1	0	-0.01
	174	175	SER	410	0	0	0	0	0	0	0	0	0	0	0	0	0.51	0.11	-0.49	0.05	0.01	0.12	0.51	0.11	-0.49	0.05	0.01	0.12	-0.5	0.11	0.49	0.05	-0.01	0.12	0	0	0	0	0	0	-0.5	0.11	0.49	0.05	-0.01	0.12	0.01	0	0
	175	176	LEU	411	0	0	0	0	0	0	0	0	0	0	0	0	0.63	0.02	-0.61	0.06	0.02	0.06	0.63	0.02	-0.61	0.06	0.01	0.06	-0.62	0.02	0.6	0.06	-0.01	0.06	0	0	0	0	0	0	-0.62	0.02	0.6	0.06	-0.01	0.06	0.01	0	-0.01
	176	177	ALA	412	0	0	0	0	0	0	0	0	0	0	0	0	-0.02	0	0.12	0.04	0.1	0.04	-0.02	0	0.12	0.04	0.1	0.04	0.02	0	-0.12	0.03	-0.1	0.04	0	0	0	0	0	0	0.02	0	-0.12	0.03	-0.1	0.04	0	0	0
	177	178	TYR	413	0	0	0	0	0	0	0	0	0	0	0	0	0.21	0.02	-0.21	0.03	0	0.04	0.21	0.02	-0.21	0.03	0	0.04	-0.2	0.02	0.21	0.03	0.01	0.04	0	0	0	0	0	0	-0.2	0.02	0.21	0.03	0.01	0.04	0	0	0
	178	179	ASN	414	0	0	0	0	0	0	0	0	0	0	0	0	-0.44	0.21	-0.13	0.1	-0.57	0.19	-0.44	0.21	-0.13	0.1	-0.57	0.19	0.45	0.21	0.14	0.1	0.58	0.19	0	0	0	0	0	0	0.45	0.21	0.14	0.1	0.58	0.19	0.01	0	0
	179	180	LYS	415	0	0	0	0	0	0	0	0	0	0	0	0	8.76	0.71	-0.15	0.1	8.61	0.77	8.76	0.71	-0.15	0.1	8.61	0.77	-8.64	0.7	0.15	0.1	-8.49	0.75	0	0	0	0	0	0	-8.64	0.7	0.15	0.1	-8.49	0.75	0.11	0.01	0
	180	181	PHE	416	0	0	0	0	0	0	-0.02	0.01	-0.01	0	-0.03	0.02	0.2	0.06	-0.15	0.13	0.04	0.13	0.17	0.05	-0.16	0.13	0.01	0.13	-0.19	0.05	0.17	0.13	-0.01	0.13	0	0	0	0	0	0	-0.19	0.05	0.17	0.13	-0.01	0.13	-0.01	0.01	0.01
	181	182	SER	417	0	0	0	0	0	0	0	0	-0.01	0	-0.01	0	0.54	0.08	-0.91	0.11	-0.37	0.15	0.54	0.08	-0.92	0.11	-0.38	0.15	-0.53	0.08	0.91	0.11	0.38	0.14	0	0	0	0	0	0	-0.53	0.08	0.91	0.11	0.38	0.14	0.01	0	-0.01
	182	183	ILE	418	0	0	0	0	0	0	-0.01	0	-0.01	0	-0.01	0	1.11	0.06	-1.23	0.09	-0.12	0.08	1.1	0.06	-1.24	0.09	-0.13	0.08	-1.1	0.06	1.22	0.09	0.12	0.08	0	0	0	0	0	0	-1.1	0.06	1.22	0.09	0.12	0.08	0.01	0	-0.02
	183	184	LYS	419	0	0	0	0	0	0	0	0	0	0	0	0	8.73	0.26	-0.07	0.04	8.66	0.27	8.73	0.26	-0.07	0.04	8.66	0.27	-8.61	0.26	0.07	0.04	-8.54	0.27	0	0	0	0	0	0	-8.61	0.26	0.07	0.04	-8.54	0.27	0.12	0	0
	184	185	SER	420	0	0	0	0	0	0	0	0	0	0	0	0	0.56	0.04	-0.33	0.08	0.23	0.08	0.56	0.04	-0.33	0.08	0.22	0.08	-0.55	0.04	0.33	0.08	-0.22	0.08	0	0	0	0	0	0	-0.55	0.04	0.33	0.08	-0.22	0.08	0.01	0	0
	185	186	ASP	421	0	0	0	0	0	0	-0.02	0.01	0	0	-0.03	0.01	-15.84	0.87	-1.59	0.08	-17.43	0.91	-15.87	0.87	-1.59	0.08	-17.46	0.91	15.69	0.86	1.57	0.08	17.26	0.9	0	0	0	0	0	0	15.69	0.86	1.57	0.08	17.26	0.9	-0.17	0.04	-0.02
	186	187	VAL	422	0	0	0	0	0	0	0	0	0	0	0	0	1.06	0.04	-1.02	0.04	0.04	0.04	1.06	0.04	-1.02	0.04	0.04	0.04	-1.05	0.04	1.01	0.04	-0.04	0.04	0	0	0	0	0	0	-1.05	0.04	1.01	0.04	-0.04	0.04	0.02	0	-0.01
	187	188	TRP	423	0	0	0	0	0	0	0	0	0	0	0	0	0.36	0.03	-0.05	0.03	0.32	0.04	0.36	0.03	-0.05	0.03	0.31	0.04	-0.36	0.03	0.05	0.03	-0.31	0.04	0	0	0	0	0	0	-0.36	0.03	0.05	0.03	-0.31	0.04	0	0	0
	188	189	ALA	424	0	0	0	0	0	0	0	0	0	0	0	0	0.03	0.01	0.34	0.05	0.38	0.05	0.03	0.01	0.34	0.05	0.37	0.05	-0.03	0.01	-0.34	0.05	-0.37	0.05	0	0	0	0	0	0	-0.03	0.01	-0.34	0.05	-0.37	0.05	0	0	0.01
	189	190	PHE	425	0	0	0	0	0	0	0	0	0	0	0	0	0.19	0.02	0	0.03	0.18	0.04	0.19	0.02	-0.01	0.03	0.18	0.04	-0.19	0.02	0.01	0.03	-0.18	0.03	0	0	0	0	0	0	-0.19	0.02	0.01	0.03	-0.18	0.03	0	0	0
	190	191	GLY	426	0	0	0	0	0	0	0	0	0	0	0	0	0	0	0.17	0.02	0.17	0.02	0	0	0.17	0.02	0.17	0.02	0	0	-0.17	0.02	-0.17	0.02	0	0	0	0	0	0	0	0	-0.17	0.02	-0.17	0.02	0	0	0
	191	192	VAL	427	0	0	0	0	0	0	0	0	0	0	0	0	0.93	0.03	-0.64	0.03	0.29	0.03	0.93	0.03	-0.64	0.03	0.29	0.03	-0.92	0.03	0.63	0.03	-0.29	0.03	0	0	0	0	0	0	-0.92	0.03	0.63	0.03	-0.29	0.03	0.01	0	-0.01
	192	193	LEU	428	0	0	0	0	0	0	0	0	0	0	0	0	0.76	0.03	-0.45	0.02	0.32	0.04	0.76	0.03	-0.45	0.02	0.31	0.04	-0.76	0.03	0.44	0.02	-0.31	0.04	0	0	0	0	0	0	-0.76	0.03	0.44	0.02	-0.31	0.04	0.01	0	-0.01
	193	194	LEU	429	0	0	0	0	0	0	0	0	0	0	0	0	0.57	0.02	-0.44	0.02	0.14	0.02	0.57	0.02	-0.44	0.02	0.13	0.02	-0.56	0.02	0.43	0.02	-0.13	0.02	0	0	0	0	0	0	-0.56	0.02	0.43	0.02	-0.13	0.02	0.01	0	-0.01
	194	195	TRP	430	0	0	0	0	0	0	0	0	0	0	0	0	0.13	0.01	-0.04	0.01	0.09	0.02	0.13	0.01	-0.04	0.01	0.09	0.02	-0.13	0.01	0.04	0.01	-0.09	0.02	0	0	0	0	0	0	-0.13	0.01	0.04	0.01	-0.09	0.02	0	0	0
	195	196	GLU	431	0	0	0	0	0	0	0	0	0	0	0	0	-8.22	0.3	-0.67	0.03	-8.89	0.31	-8.22	0.3	-0.67	0.03	-8.89	0.31	8.13	0.3	0.66	0.03	8.79	0.31	0	0	0	0	0	0	8.13	0.3	0.66	0.03	8.79	0.31	-0.09	0.01	-0.01
	196	197	ILE	432	0	0	0	0	0	0	0	0	0	0	0	0	0.65	0.02	-0.49	0.02	0.16	0.02	0.65	0.02	-0.49	0.02	0.16	0.02	-0.64	0.02	0.48	0.02	-0.16	0.02	0	0	0	0	0	0	-0.64	0.02	0.48	0.02	-0.16	0.02	0.01	0	-0.01
	197	198	ALA	433	0	0	0	0	0	0	0	0	0	0	0	0	-0.01	0	0.14	0.01	0.13	0.01	-0.01	0	0.14	0.01	0.13	0.01	0.01	0	-0.14	0.01	-0.13	0.01	0	0	0	0	0	0	0.01	0	-0.14	0.01	-0.13	0.01	0	0	0
	198	199	THR	434	0	0	0	0	0	0	0	0	0	0	0	0	0.28	0.01	-0.23	0.02	0.06	0.02	0.28	0.01	-0.23	0.02	0.06	0.02	-0.28	0.01	0.22	0.02	-0.05	0.02	0	0	0	0	0	0	-0.28	0.01	0.22	0.02	-0.05	0.02	0	0	0
	199	200	TYR	435	0	0	0	0	0	0	0	0	0	0	0	0	0.14	0.01	-0.06	0.02	0.08	0.02	0.14	0.01	-0.06	0.02	0.08	0.02	-0.14	0.01	0.06	0.02	-0.08	0.02	0	0	0	0	0	0	-0.14	0.01	0.06	0.02	-0.08	0.02	0	0	0
	200	201	GLY	436	0	0	0	0	0	0	0	0	0	0	0	0	0	0	0.07	0.03	0.07	0.03	0	0	0.07	0.03	0.07	0.03	0	0	-0.07	0.03	-0.07	0.03	0	0	0	0	0	0	0	0	-0.07	0.03	-0.07	0.03	0	0	0
	201	202	MET	437	0	0	0	0	0	0	0	0	0	0	0	0	0.31	0.02	-0.51	0.03	-0.2	0.04	0.31	0.02	-0.51	0.03	-0.2	0.04	-0.3	0.02	0.5	0.03	0.2	0.03	0	0	0	0	0	0	-0.3	0.02	0.5	0.03	0.2	0.03	0	0	0
	202	203	SER	438	0	0	0	0	0	0	0	0	0	0	0	0	0.36	0.08	-0.2	0.01	0.16	0.08	0.36	0.08	-0.2	0.01	0.16	0.08	-0.35	0.08	0.2	0.01	-0.16	0.08	0	0	0	0	0	0	-0.35	0.08	0.2	0.01	-0.16	0.08	0.01	0	0
	203	204	PRO	439	0	0	0	0	0	0	0	0	0	0	0	0	1.6	0.05	-1.48	0.06	0.11	0.03	1.6	0.05	-1.48	0.06	0.11	0.03	-1.58	0.05	1.46	0.06	-0.11	0.03	0	0	0	0	0	0	-1.58	0.05	1.46	0.06	-0.11	0.03	0.02	0	-0.02
	204	205	TYR	440	0	0	0	0	0	0	0	0	0	0	0	0	0.24	0.1	-0.22	0.03	0.03	0.11	0.24	0.1	-0.22	0.03	0.03	0.11	-0.24	0.1	0.21	0.03	-0.03	0.1	0	0	0	0	0	0	-0.24	0.1	0.21	0.03	-0.03	0.1	0	0	0
	205	206	PRO	441	0	0	0	0	0	0	0	0	0	0	0	0	1.19	0.03	-1.21	0.04	-0.02	0.02	1.19	0.03	-1.21	0.04	-0.02	0.02	-1.18	0.03	1.2	0.04	0.02	0.02	0	0	0	0	0	0	-1.18	0.03	1.2	0.04	0.02	0.02	0.01	0	-0.02
	206	207	GLY	442	0	0	0	0	0	0	0	0	0	0	0	0	0	0	0.05	0.02	0.05	0.02	0	0	0.05	0.02	0.05	0.02	0	0	-0.05	0.02	-0.05	0.02	0	0	0	0	0	0	0	0	-0.05	0.02	-0.05	0.02	0	0	0
	207	208	ILE	443	0	0	0	0	0	0	0	0	0	0	0	0	0.48	0.01	-0.54	0.03	-0.05	0.02	0.48	0.01	-0.54	0.03	-0.05	0.02	-0.48	0.01	0.53	0.02	0.05	0.02	0	0	0	0	0	0	-0.48	0.01	0.53	0.02	0.05	0.02	0.01	0	-0.01
	208	209	ASP	444	0	0	0	0	0	0	0	0	0	0	0	0	-4.71	0.15	-0.86	0.03	-5.57	0.16	-4.71	0.15	-0.86	0.03	-5.57	0.16	4.65	0.14	0.85	0.03	5.5	0.15	0	0	0	0	0	0	4.65	0.14	0.85	0.03	5.5	0.15	-0.06	0	-0.01
	209	210	LEU	445	0	0	0	0	0	0	0	0	0	0	0	0	0.49	0.02	-0.56	0.03	-0.08	0.03	0.49	0.02	-0.56	0.03	-0.08	0.03	-0.48	0.02	0.56	0.03	0.08	0.03	0	0	0	0	0	0	-0.48	0.02	0.56	0.03	0.08	0.03	0.01	0	-0.01
	210	211	SER	446	0	0	0	0	0	0	0	0	0	0	0	0	0.37	0.02	-0.34	0.03	0.03	0.03	0.37	0.02	-0.34	0.03	0.03	0.03	-0.37	0.02	0.34	0.03	-0.03	0.03	0	0	0	0	0	0	-0.37	0.02	0.34	0.03	-0.03	0.03	0	0	0
	211	212	GLN	447	0	0	0	0	0	0	0	0	0	0	0	0	0.17	0.04	-0.15	0.01	0.02	0.04	0.17	0.04	-0.15	0.01	0.02	0.04	-0.16	0.04	0.15	0.01	-0.02	0.04	0	0	0	0	0	0	-0.16	0.04	0.15	0.01	-0.02	0.04	0	0	0
	212	213	VAL	448	0	0	0	0	0	0	0	0	0	0	0	0	0.71	0.02	-0.61	0.03	0.1	0.03	0.71	0.02	-0.61	0.03	0.1	0.03	-0.7	0.02	0.6	0.03	-0.1	0.03	0	0	0	0	0	0	-0.7	0.02	0.6	0.03	-0.1	0.03	0.01	0	-0.01
	213	214	TYR	449	0	0	0	0	0	0	0	0	0	0	0	0	0.13	0.02	-0.16	0.02	-0.03	0.04	0.13	0.02	-0.16	0.02	-0.03	0.04	-0.13	0.02	0.15	0.02	0.03	0.03	0	0	0	0	0	0	-0.13	0.02	0.15	0.02	0.03	0.03	0	0	0
	214	215	GLU	450	0	0	0	0	0	0	0	0	0	0	0	0	-4.57	0.11	-0.64	0.03	-5.21	0.12	-4.57	0.11	-0.64	0.03	-5.21	0.12	4.51	0.11	0.63	0.03	5.14	0.12	0	0	0	0	0	0	4.51	0.11	0.63	0.03	5.14	0.12	-0.06	0	-0.01
	215	216	LEU	451	0	0	0	0	0	0	0	0	0	0	0	0	0.41	0.01	-0.34	0.02	0.08	0.02	0.41	0.01	-0.34	0.02	0.08	0.02	-0.41	0.01	0.33	0.02	-0.08	0.02	0	0	0	0	0	0	-0.41	0.01	0.33	0.02	-0.08	0.02	0.01	0	0
	216	217	LEU	452	0	0	0	0	0	0	0	0	0	0	0	0	0.51	0.01	-0.4	0.02	0.11	0.03	0.51	0.01	-0.4	0.02	0.11	0.03	-0.5	0.01	0.39	0.02	-0.11	0.03	0	0	0	0	0	0	-0.5	0.01	0.39	0.02	-0.11	0.03	0.01	0	-0.01
	217	218	GLU	453	0	0	0	0	0	0	0	0	0	0	0	0	-4.98	0.16	-0.63	0.02	-5.61	0.17	-4.98	0.16	-0.63	0.02	-5.61	0.17	4.92	0.16	0.62	0.02	5.54	0.17	0	0	0	0	0	0	4.92	0.16	0.62	0.02	5.54	0.17	-0.06	0	-0.01
	218	219	LYS	454	0	0	0	0	0	0	0	0	0	0	0	0	5.08	0.14	-0.05	0.01	5.03	0.14	5.08	0.14	-0.05	0.01	5.03	0.14	-5.02	0.14	0.05	0.01	-4.97	0.14	0	0	0	0	0	0	-5.02	0.14	0.05	0.01	-4.97	0.14	0.06	0	0
	219	220	ASP	455	0	0	0	0	0	0	0	0	0	0	0	0	-4.64	0.19	-0.68	0.03	-5.33	0.2	-4.64	0.19	-0.68	0.03	-5.33	0.2	4.58	0.19	0.67	0.03	5.26	0.2	0	0	0	0	0	0	4.58	0.19	0.67	0.03	5.26	0.2	-0.06	0	-0.01
	220	221	TYR	456	0	0	0	0	0	0	0	0	0	0	0	0	0.22	0.01	-0.29	0.02	-0.06	0.02	0.22	0.01	-0.29	0.02	-0.06	0.02	-0.22	0.01	0.28	0.02	0.06	0.02	0	0	0	0	0	0	-0.22	0.01	0.28	0.02	0.06	0.02	0	0	0
	221	222	ARG	457	0	0	0	0	0	0	0	0	0	0	0	0	6.45	0.14	-0.1	0.01	6.36	0.14	6.45	0.14	-0.1	0.01	6.36	0.14	-6.37	0.14	0.09	0.01	-6.28	0.14	0	0	0	0	0	0	-6.37	0.14	0.09	0.01	-6.28	0.14	0.08	0	0
	222	223	MET	458	0	0	0	0	0	0	0	0	0	0	0	0	0.33	0.02	-0.27	0.02	0.06	0.03	0.33	0.02	-0.27	0.02	0.06	0.03	-0.33	0.02	0.27	0.02	-0.06	0.03	0	0	0	0	0	0	-0.33	0.02	0.27	0.02	-0.06	0.03	0	0	0
	223	224	GLU	459	0	0	0	0	0	0	0	0	0	0	0	0	-4.25	0.11	-0.79	0.02	-5.05	0.12	-4.25	0.11	-0.79	0.02	-5.05	0.12	4.2	0.1	0.78	0.02	4.98	0.12	0	0	0	0	0	0	4.2	0.1	0.78	0.02	4.98	0.12	-0.05	0	-0.01
	224	225	ARG	460	0	0	0	0	0	0	0	0	0	0	0	0	5.11	0.09	-0.11	0.01	5	0.09	5.11	0.09	-0.11	0.01	5	0.09	-5.05	0.09	0.1	0.01	-4.94	0.09	0	0	0	0	0	0	-5.05	0.09	0.1	0.01	-4.94	0.09	0.06	0	0
	225	226	PRO	461	0	0	0	0	0	0	0	0	0	0	0	0	1.19	0.02	-1.1	0.03	0.09	0.02	1.19	0.02	-1.1	0.03	0.09	0.02	-1.17	0.02	1.09	0.03	-0.09	0.02	0	0	0	0	0	0	-1.17	0.02	1.09	0.03	-0.09	0.02	0.01	0	-0.01
	226	227	GLU	462	0	0	0	0	0	0	0	0	0	0	0	0	-3.99	0.1	-0.72	0.02	-4.71	0.11	-3.99	0.1	-0.72	0.02	-4.71	0.11	3.94	0.1	0.71	0.02	4.65	0.11	0	0	0	0	0	0	3.94	0.1	0.71	0.02	4.65	0.11	-0.05	0	-0.01
	227	228	GLY	463	0	0	0	0	0	0	0	0	0	0	0	0	0	0	-0.04	0.02	-0.04	0.02	0	0	-0.04	0.02	-0.04	0.02	0	0	0.04	0.02	0.04	0.02	0	0	0	0	0	0	0	0	0.04	0.02	0.04	0.02	0	0	0
	228	229	CYS	464	0	0	0	0	0	0	0	0	0	0	0	0	-0.12	0.03	0.21	0.02	0.09	0.03	-0.12	0.03	0.21	0.02	0.09	0.03	0.12	0.03	-0.21	0.02	-0.09	0.03	0	0	0	0	0	0	0.12	0.03	-0.21	0.02	-0.09	0.03	0	0	0
	229	230	PRO	465	0	0	0	0	0	0	0	0	0	0	0	0	1.1	0.02	-1.2	0.03	-0.09	0.02	1.1	0.02	-1.2	0.03	-0.09	0.02	-1.09	0.02	1.18	0.02	0.09	0.02	0	0	0	0	0	0	-1.09	0.02	1.18	0.02	0.09	0.02	0.01	0	-0.02
	230	231	GLU	466	0	0	0	0	0	0	0	0	0	0	0	0	-4.08	0.08	-0.69	0.02	-4.78	0.09	-4.08	0.08	-0.69	0.02	-4.78	0.09	4.03	0.08	0.68	0.02	4.72	0.09	0	0	0	0	0	0	4.03	0.08	0.68	0.02	4.72	0.09	-0.05	0	-0.01
	231	232	LYS	467	0	0	0	0	0	0	0	0	0	0	0	0	5.49	0.2	-0.22	0.01	5.27	0.2	5.49	0.2	-0.22	0.01	5.27	0.2	-5.42	0.2	0.22	0.01	-5.2	0.19	0	0	0	0	0	0	-5.42	0.2	0.22	0.01	-5.2	0.19	0.07	0	0
	232	233	VAL	468	0	0	0	0	0	0	0	0	0	0	0	0	0.64	0.01	-0.76	0.02	-0.12	0.01	0.64	0.01	-0.76	0.02	-0.12	0.01	-0.63	0.01	0.75	0.02	0.12	0.01	0	0	0	0	0	0	-0.63	0.01	0.75	0.02	0.12	0.01	0.01	0	-0.01
	233	234	TYR	469	0	0	0	0	0	0	0	0	0	0	0	0	0.11	0.01	-0.25	0.02	-0.14	0.02	0.1	0.01	-0.25	0.02	-0.14	0.02	-0.1	0.01	0.25	0.02	0.14	0.02	0	0	0	0	0	0	-0.1	0.01	0.25	0.02	0.14	0.02	0	0	0
	234	235	GLU	470	0	0	0	0	0	0	0	0	0	0	0	0	-4.64	0.12	-0.77	0.02	-5.41	0.13	-4.64	0.12	-0.77	0.02	-5.41	0.13	4.58	0.12	0.76	0.02	5.34	0.13	0	0	0	0	0	0	4.58	0.12	0.76	0.02	5.34	0.13	-0.06	0	-0.01
	235	236	LEU	471	0	0	0	0	0	0	0	0	0	0	0	0	0.5	0.02	-0.6	0.03	-0.09	0.03	0.5	0.02	-0.6	0.03	-0.09	0.03	-0.5	0.02	0.59	0.03	0.09	0.03	0	0	0	0	0	0	-0.5	0.02	0.59	0.03	0.09	0.03	0.01	0	-0.01
	236	237	MET	472	0	0	0	0	0	0	0	0	0	0	0	0	0.37	0.03	-0.49	0.02	-0.12	0.03	0.37	0.03	-0.49	0.02	-0.12	0.03	-0.37	0.03	0.48	0.02	0.12	0.03	0	0	0	0	0	0	-0.37	0.03	0.48	0.02	0.12	0.03	0	0	-0.01
	237	238	ARG	473	0	0	0	0	0	0	0	0	0	0	0	0	5.55	0.11	-0.27	0.03	5.28	0.11	5.55	0.11	-0.27	0.03	5.28	0.11	-5.48	0.11	0.27	0.03	-5.22	0.11	0	0	0	0	0	0	-5.48	0.11	0.27	0.03	-5.22	0.11	0.07	0	0
	238	239	ALA	474	0	0	0	0	0	0	0	0	0	0	0	0	-0.01	0	-0.04	0.02	-0.05	0.02	-0.01	0	-0.04	0.02	-0.05	0.02	0.01	0	0.04	0.02	0.05	0.02	0	0	0	0	0	0	0.01	0	0.04	0.02	0.05	0.02	0	0	0
	239	240	CYS	475	0	0	0	0	0	0	0	0	0	0	0	0	-0.23	0.03	0.03	0.03	-0.2	0.04	-0.23	0.03	0.03	0.03	-0.2	0.04	0.23	0.03	-0.03	0.03	0.2	0.04	0	0	0	0	0	0	0.23	0.03	-0.03	0.03	0.2	0.04	0	0	0
	240	241	TRP	476	0	0	0	0	0	0	0	0	0	0	0	0	0.37	0.02	-0.14	0.02	0.24	0.03	0.37	0.02	-0.14	0.02	0.24	0.03	-0.37	0.02	0.14	0.02	-0.23	0.03	0	0	0	0	0	0	-0.37	0.02	0.14	0.02	-0.23	0.03	0	0	0
	241	242	GLN	477	0	0	0	0	0	0	0	0	0	0	0	0	0.24	0.03	-0.43	0.02	-0.19	0.03	0.24	0.03	-0.43	0.02	-0.19	0.03	-0.24	0.03	0.43	0.02	0.19	0.03	0	0	0	0	0	0	-0.24	0.03	0.43	0.02	0.19	0.03	0	0	-0.01
	242	243	TRP	478	0	0	0	0	0	0	0	0	0	0	0	0	0.13	0.03	-0.41	0.02	-0.28	0.03	0.13	0.03	-0.41	0.02	-0.28	0.03	-0.13	0.03	0.4	0.02	0.28	0.03	0	0	0	0	0	0	-0.13	0.03	0.4	0.02	0.28	0.03	0	0	0
	243	244	ASN	479	0	0	0	0	0	0	0	0	0	0	0	0	-0.24	0.07	0.03	0.02	-0.21	0.07	-0.24	0.07	0.03	0.02	-0.21	0.07	0.24	0.07	-0.03	0.02	0.2	0.07	0	0	0	0	0	0	0.24	0.07	-0.03	0.02	0.2	0.07	0	0	0
	244	245	PRO	480	0	0	0	0	0	0	0	0	0	0	0	0	1.64	0.05	-1.63	0.05	0.01	0.04	1.64	0.05	-1.63	0.05	0.01	0.04	-1.62	0.05	1.61	0.05	-0.01	0.04	0	0	0	0	0	0	-1.62	0.05	1.61	0.05	-0.01	0.04	0.02	0	-0.02
	245	246	SER	481	0	0	0	0	0	0	0	0	0	0	0	0	0.3	0.07	-0.39	0.04	-0.1	0.09	0.3	0.07	-0.39	0.04	-0.1	0.09	-0.29	0.07	0.39	0.04	0.1	0.09	0	0	0	0	0	0	-0.29	0.07	0.39	0.04	0.1	0.09	0	0	0
	246	247	ASP	482	0	0	0	0	0	0	0	0	0	0	0	0	-5.13	0.11	-0.9	0.03	-6.03	0.13	-5.13	0.11	-0.9	0.03	-6.03	0.13	5.07	0.11	0.89	0.03	5.95	0.13	0	0	0	0	0	0	5.07	0.11	0.89	0.03	5.95	0.13	-0.06	0	-0.01
	247	248	ARG	483	0	0	0	0	0	0	0	0	0	0	0	0	8.93	0.27	-0.27	0.03	8.66	0.27	8.93	0.27	-0.27	0.03	8.66	0.27	-8.81	0.26	0.27	0.03	-8.54	0.26	0	0	0	0	0	0	-8.81	0.26	0.27	0.03	-8.54	0.26	0.12	0	0
	248	249	PRO	484	0	0	0	0	0	0	0	0	0	0	0	0	1.51	0.04	-1.79	0.06	-0.28	0.03	1.51	0.04	-1.79	0.06	-0.28	0.03	-1.49	0.04	1.77	0.06	0.28	0.03	0	0	0	0	0	0	-1.49	0.04	1.77	0.06	0.28	0.03	0.02	0	-0.02
	249	250	SER	485	0	0	0	0	0	0	0	0	0	0	0	0	0.46	0.06	-0.24	0.02	0.21	0.06	0.46	0.06	-0.24	0.02	0.21	0.06	-0.45	0.06	0.24	0.02	-0.21	0.06	0	0	0	0	0	0	-0.45	0.06	0.24	0.02	-0.21	0.06	0.01	0	0
	250	251	PHE	486	0	0	0	0	0	0	0	0	0	0	-0.01	0	0.22	0.03	0.02	0.04	0.24	0.05	0.22	0.03	0.02	0.04	0.23	0.05	-0.22	0.03	-0.02	0.04	-0.24	0.04	0	0	0	0	0	0	-0.22	0.03	-0.02	0.04	-0.24	0.04	-0.01	0	0
	251	252	ALA	487	0	0	0	0	0	0	0	0	0	0	0	0	-0.02	0	0.13	0.03	0.11	0.03	-0.02	0	0.13	0.03	0.11	0.03	0.02	0	-0.13	0.03	-0.11	0.03	0	0	0	0	0	0	0.02	0	-0.13	0.03	-0.11	0.03	0	0	0
	252	253	GLU	488	0	0	0	0	0	0	0	0	0	0	0	0	-6.04	0.2	-0.73	0.02	-6.77	0.21	-6.04	0.2	-0.73	0.02	-6.77	0.21	5.96	0.2	0.72	0.02	6.69	0.2	0	0	0	0	0	0	5.96	0.2	0.72	0.02	6.69	0.2	-0.07	0	-0.01
	253	254	ILE	489	0	0	0	0	0	0	0	0	0	0	0	0	0.72	0.03	-0.46	0.02	0.26	0.03	0.72	0.03	-0.46	0.02	0.26	0.03	-0.71	0.03	0.46	0.02	-0.25	0.03	0	0	0	0	0	0	-0.71	0.03	0.46	0.02	-0.25	0.03	0.01	0	0
	254	255	HIS	490	0	0	0	0	0	0	0	0	0	0	0	0	0.26	0.14	-0.13	0.02	0.14	0.14	0.26	0.14	-0.13	0.02	0.13	0.14	-0.26	0.13	0.13	0.02	-0.13	0.13	0	0	0	0	0	0	-0.26	0.13	0.13	0.02	-0.13	0.13	0.01	0	0
	255	256	GLN	491	0	0	0	0	0	0	0	0	0	0	0	0	0.33	0.13	-0.1	0.01	0.23	0.13	0.33	0.13	-0.1	0.01	0.23	0.13	-0.32	0.13	0.1	0.01	-0.23	0.13	0	0	0	0	0	0	-0.32	0.13	0.1	0.01	-0.23	0.13	0	0	0
	256	257	ALA	492	0	0	0	0	0	0	0	0	0	0	0	0	-0.01	0	0.17	0.01	0.16	0.01	-0.01	0	0.17	0.01	0.16	0.01	0.01	0	-0.17	0.01	-0.16	0.01	0	0	0	0	0	0	0.01	0	-0.17	0.01	-0.16	0.01	0	0	0
	257	258	PHE	493	0	0	0	0	0	0	0	0	0	0	0	0	0.14	0.02	0.03	0.02	0.16	0.02	0.14	0.02	0.03	0.02	0.16	0.02	-0.13	0.02	-0.03	0.02	-0.16	0.02	0	0	0	0	0	0	-0.13	0.02	-0.03	0.02	-0.16	0.02	0	0	0
	258	259	GLU	494	0	0	0	0	0	0	0	0	0	0	0	0	-5.61	0.39	-0.62	0.02	-6.23	0.4	-5.61	0.39	-0.62	0.02	-6.23	0.4	5.54	0.39	0.61	0.02	6.15	0.4	0	0	0	0	0	0	5.54	0.39	0.61	0.02	6.15	0.4	-0.07	0	-0.01
	259	260	THR	495	0	0	0	0	0	0	0	0	0	0	0	0	0.31	0.03	-0.19	0.01	0.12	0.03	0.31	0.03	-0.19	0.01	0.12	0.03	-0.31	0.03	0.19	0.01	-0.12	0.03	0	0	0	0	0	0	-0.31	0.03	0.19	0.01	-0.12	0.03	0	0	0
	260	261	MET	496	0	0	0	0	0	0	0	0	0	0	0	0	0.34	0.02	-0.16	0.01	0.17	0.02	0.34	0.02	-0.16	0.01	0.17	0.02	-0.33	0.02	0.16	0.01	-0.17	0.02	0	0	0	0	0	0	-0.33	0.02	0.16	0.01	-0.17	0.02	0	0	0
	261	262	PHE	497	0	0	0	0	0	0	0	0	0	0	0	0	0.11	0.01	-0.11	0.05	0	0.05	0.11	0.01	-0.11	0.05	0	0.05	-0.11	0.01	0.11	0.04	0	0.05	0	0	0	0	0	0	-0.11	0.01	0.11	0.04	0	0.05	0	0	0
	262	263	GLN	498	0	0	0	0	0	0	0	0	0	0	0	0	-7.85	0.49	2.84	0.17	-5.02	0.32	-7.85	0.49	2.84	0.17	-5.02	0.32	7.75	0.49	-2.8	0.17	4.95	0.32	0	0	0	0	0	0	7.75	0.49	-2.8	0.17	4.95	0.32	-0.1	0.01	0.04
	263	264	LIG	499	0	0	0	0	0	0	-31.55	1.6	0	0	-31.55	1.6	-85.04	8.1	0	0	-85.04	8.1	-116.59	8.3	0	0	-116.59	8.3	96.82	7.33	0	0	96.82	7.33	-5.6	0.14	0	0	-5.6	0.14	91.23	7.38	0	0	91.23	7.38	-25.36	2.56	0
[truncated: 3 more columns]

## Sheet: wt_imatinib
=>>	COMPLEX
	Number	Residue	Residue Name	Residue ID	SINT		BINT		TINT		SVDW		BVDW		TVDW		SELE		BELE		TELE		SGAS		BGAS		TGAS		SGB		BGB		TGB		SGBSUR		BGBSUR		TGBSUR		SGBSOL		BGBSOL		TGBSOL		SGBTOT		BGBTOT
	0	1	TRP	235	13.34	2.73	4.44	1.1	17.77	3.07	-3.75	0.77	-1.95	0.52	-5.7	0.91	-10.68	3.92	-21.29	0.86	-31.97	4.46	-1.1	4.51	-18.8	1.42	-19.9	5.24	-48.78	3.72	-7.99	0.64	-56.77	4.17	1.2	0.1	0.01	0.01	1.21	0.1	-47.59	3.74	-7.98	0.63	-55.57	4.19	-48.68	3.01	-26.78
	1	2	GLU	236	6.48	1.76	9.88	1.38	16.37	2.19	-2.37	1.09	-0.39	0.67	-2.75	1.3	-40.7	5.45	-4.82	1.5	-45.52	5.36	-36.59	5.75	4.68	1.93	-31.91	5.9	-19.81	4.88	-3.04	1.32	-22.85	4.92	0.29	0.07	0.16	0.03	0.45	0.08	-19.53	4.84	-2.87	1.33	-22.4	4.88	-56.11	1.95	1.8
	2	3	MET	237	7.61	1.93	10.06	1.11	17.67	2.33	-6	0.91	-0.82	0.76	-6.81	1.31	-0.24	0.54	-7.8	1.54	-8.04	1.61	1.37	2.48	1.45	1.73	2.82	3.13	-0.2	0.45	-3.72	1.33	-3.92	1.37	0.08	0.06	0.05	0.02	0.12	0.06	-0.12	0.44	-3.67	1.33	-3.8	1.36	1.25	2.31	-2.23
	3	4	GLU	238	6.44	1.92	10.34	1.25	16.78	2.33	-0.67	0.86	-0.92	0.76	-1.59	1.26	-20.52	9.3	0.58	1.55	-19.94	9.59	-14.75	8.89	10	1.81	-4.76	9.22	-43.85	8.04	-3.74	0.96	-47.59	8.14	0.68	0.1	0.02	0.01	0.7	0.11	-43.17	7.96	-3.72	0.96	-46.9	8.05	-57.92	2.08	6.27
	4	5	ARG	239	13.83	2.99	10.9	1.55	24.72	3.54	-2.86	1.22	-0.71	0.62	-3.57	1.39	-191.79	6.77	-4.93	1.08	-196.72	6.99	-180.82	7.45	5.25	1.72	-175.57	7.83	3.98	4.64	-5.02	0.8	-1.04	4.93	0.46	0.05	0.13	0.04	0.59	0.06	4.44	4.65	-4.89	0.79	-0.45	4.92	-176.38	3.9	0.36
	5	6	THR	240	6.42	1.37	10.44	1.56	16.86	2.34	0.01	0.48	0.92	0.9	0.94	1.14	-19.95	1.04	-22.07	2.52	-42.01	2.7	-13.52	1.69	-10.7	2.8	-24.21	3.62	-4.59	0.63	-0.32	1.79	-4.9	1.7	0.77	0.04	0.09	0.04	0.87	0.05	-3.81	0.63	-0.23	1.77	-4.04	1.68	-17.33	1.51	-10.92
	6	7	ASP	241	4.52	1.4	10.5	1.53	15.02	2.15	-2.72	0.8	-0.89	0.94	-3.62	1.25	-34.15	5.63	-10.59	1.36	-44.73	6.34	-32.35	5.59	-0.98	1.86	-33.33	6.47	-25.7	6.18	-1.31	0.85	-27.01	6.65	0.22	0.05	0.02	0.01	0.24	0.05	-25.49	6.14	-1.29	0.85	-26.78	6.62	-57.84	2	-2.27
	7	8	ILE	242	10.02	2.24	10.45	1.47	20.46	2.88	-3.79	1	-0.43	1.02	-4.21	1.61	-3.15	0.3	-7.51	1.45	-10.66	1.45	3.08	2.28	2.51	2.16	5.59	3.29	1.03	0.25	-3.74	1.07	-2.71	1	0.02	0.02	0.03	0.02	0.05	0.04	1.05	0.25	-3.71	1.06	-2.67	0.99	4.13	2.25	-1.2
	8	9	THR	243	6.36	1.76	10.24	1.3	16.6	2.24	-1.08	0.67	-0.64	0.89	-1.73	1.14	-21.88	3.11	-11.83	1.45	-33.72	3.73	-16.61	3.35	-2.24	1.79	-18.85	3.89	-2.06	2.33	-2.89	1.05	-4.95	2.46	0.34	0.08	0.03	0.01	0.38	0.08	-1.71	2.31	-2.86	1.04	-4.57	2.45	-18.33	1.9	-5.1
	9	10	MET	244	7.25	1.8	10.39	1.56	17.64	2.65	-4.68	0.62	-0.62	0.72	-5.3	1.11	0.38	0.72	0.78	1.35	1.16	1.28	2.95	1.82	10.54	2.01	13.49	2.8	-0.83	0.51	-3.24	1.21	-4.06	1.25	0.22	0.08	0.15	0.03	0.37	0.09	-0.61	0.47	-3.09	1.19	-3.7	1.23	2.34	1.78	7.45
	10	11	LYS	245	11.31	2.24	12.48	1.6	23.78	2.7	-0.62	1.06	-0.47	0.65	-1.1	1.31	10.02	8.4	-5.07	1.18	4.95	8.33	20.71	9.18	6.93	1.6	27.64	8.99	-36.52	8.68	-3.27	1.02	-39.8	8.11	1.04	0.17	0.22	0.03	1.26	0.15	-35.48	8.57	-3.05	0.99	-38.54	8.01	-14.78	2.69	3.88
	11	12	HIS	246	25.06	2	9.76	1.26	34.82	2.6	-3.48	0.66	-1	0.86	-4.49	1.21	-17.38	2.59	-4.9	0.91	-22.28	2.7	4.19	3.04	3.86	1.48	8.05	3.58	0.79	1.85	-4.1	0.58	-3.31	1.96	0.61	0.09	0.04	0.01	0.65	0.09	1.4	1.84	-4.06	0.58	-2.66	1.95	5.6	2.14	-0.2
	12	13	LYS	247	11.45	2.51	10.51	1.4	21.96	2.7	-2.95	0.87	-1.96	0.73	-4.91	1.25	0.91	8.73	-4.14	1.36	-3.22	8.41	9.42	8.24	4.41	1.65	13.83	8.42	-27.09	8.81	-3.02	0.96	-30.1	8.61	0.62	0.1	0.04	0.01	0.66	0.1	-26.47	8.75	-2.97	0.95	-29.44	8.56	-17.05	3.04	1.44
	13	14	LEU	248	9.02	1.95	9.86	1.21	18.88	2.53	-3.79	0.94	-2.48	0.72	-6.27	1.23	-25.32	0.41	-10.29	1.28	-35.61	1.34	-20.09	2.28	-2.91	1.4	-23	2.94	1.75	0.24	-1.81	0.72	-0.06	0.76	0.03	0.02	0	0	0.03	0.02	1.77	0.25	-1.81	0.72	-0.04	0.77	-18.32	2.29	-4.72
	14	15	GLY	249	0	0	8.34	1.42	8.34	1.42	0	0	-1.71	0.49	-1.71	0.49	0	0	-6.93	2.02	-6.93	2.02	0	0	-0.3	2.68	-0.3	2.68	0	0	-5.79	1.68	-5.79	1.68	0	0	0.36	0.04	0.36	0.04	0	0	-5.43	1.68	-5.43	1.68	0	0	-5.73
	15	16	GLY	250	0	0	8.54	1.49	8.54	1.49	0	0	-0.42	0.64	-0.42	0.64	0	0	-5.58	3.04	-5.58	3.04	0	0	2.54	3.46	2.54	3.46	0	0	-7.02	2.93	-7.02	2.93	0	0	0.53	0.12	0.53	0.12	0	0	-6.49	2.84	-6.49	2.84	0	0	-3.95
	16	17	GLY	251	0	0	9.58	1.57	9.58	1.57	0	0	-1.26	0.63	-1.26	0.63	0	0	-7.52	1.34	-7.52	1.34	0	0	0.8	1.62	0.8	1.62	0	0	-5.18	1.28	-5.18	1.28	0	0	0.36	0.1	0.36	0.1	0	0	-4.82	1.24	-4.82	1.24	0	0	-4.02
	17	18	GLN	252	14.1	2.29	10.39	1.7	24.49	2.85	-2.36	0.81	-0.6	0.85	-2.95	1.23	-65.14	3.43	-6.51	1.16	-71.65	3.19	-53.4	3.89	3.29	1.76	-50.11	4.26	-7.33	3.16	-3.96	0.93	-11.29	2.91	0.49	0.11	0.16	0.04	0.64	0.12	-6.84	3.14	-3.8	0.92	-10.65	2.88	-60.24	2.26	-0.52
	18	19	TYR	253	8.85	2.43	8.74	1.29	17.59	2.9	-4.75	0.73	-1.42	0.73	-6.17	0.96	-17.46	0.71	-3.85	1.89	-21.31	2.22	-13.36	2.57	3.48	2.41	-9.88	3.97	-2.92	0.48	-3.22	1.34	-6.15	1.59	0.05	0.02	0.01	0.01	0.06	0.02	-2.87	0.47	-3.22	1.34	-6.09	1.58	-16.23	2.5	0.26
	19	20	GLY	254	0	0	9.81	1.46	9.81	1.46	0	0	-1.92	0.72	-1.92	0.72	0	0	-10.56	2.94	-10.56	2.94	0	0	-2.66	2.79	-2.66	2.79	0	0	-2.27	1.99	-2.27	1.99	0	0	0.19	0.07	0.19	0.07	0	0	-2.08	1.96	-2.08	1.96	0	0	-4.74
	20	21	GLU	255	6	1.72	9.78	1.3	15.78	2.29	-1.5	1.13	-0.28	0.87	-1.78	1.57	-30.98	6.68	-9.28	1.57	-40.26	6.85	-26.48	6.73	0.23	1.72	-26.26	7.13	-30.31	6.58	-2.75	0.66	-33.06	6.68	0.26	0.08	0.03	0.01	0.29	0.08	-30.05	6.53	-2.72	0.65	-32.77	6.63	-56.53	2	-2.49
	21	22	VAL	256	5.8	1.53	9.78	1.37	15.58	2.14	-3.47	0.73	-1.45	0.79	-4.92	1.13	-16.55	0.45	-12.45	0.95	-28.99	0.88	-14.21	1.72	-4.12	1.64	-18.33	2.43	1.63	0.32	-1.71	0.68	-0.08	0.51	0.02	0.01	0	0	0.02	0.01	1.66	0.32	-1.71	0.68	-0.06	0.51	-12.56	1.63	-5.83
	22	23	TYR	257	8.65	1.83	10.19	1.23	18.84	2.17	-3.52	0.69	-2.34	0.93	-5.86	1.17	-17.3	1.06	-11.94	0.91	-29.23	1.52	-12.17	2.25	-4.09	1.52	-16.25	2.84	-4.3	0.72	-1.73	0.37	-6.03	0.78	0.44	0.05	0	0	0.44	0.05	-3.87	0.71	-1.73	0.37	-5.59	0.77	-16.03	2.06	-5.81
	23	24	GLU	258	6.21	1.8	9.52	1.45	15.73	2.34	-2.82	0.92	-2.12	0.77	-4.94	1.28	1.3	6.65	-9.83	2.36	-8.53	8.16	4.7	6.94	-2.43	3	2.26	8.81	-62.34	6.47	-0.58	1.72	-62.92	7.53	0.34	0.06	0.01	0.01	0.35	0.07	-62	6.45	-0.57	1.72	-62.57	7.51	-57.3	1.73	-3.01
	24	25	GLY	259	0	0	8.82	1.54	8.82	1.54	0	0	-2.89	0.89	-2.89	0.89	0	0	-5.52	1.26	-5.52	1.26	0	0	0.41	1.94	0.41	1.94	0	0	-5.01	0.78	-5.01	0.78	0	0	0.04	0.02	0.04	0.02	0	0	-4.97	0.78	-4.97	0.78	0	0	-4.56
	25	26	VAL	260	6.08	1.66	9.83	1.19	15.91	2.05	-1.84	0.73	-1.4	0.88	-3.24	1.28	-16.35	0.6	-12.39	1.05	-28.74	1.02	-12.11	1.74	-3.96	1.64	-16.07	2.22	1.33	0.49	-1.3	0.56	0.02	0.51	0.38	0.07	0	0	0.38	0.07	1.71	0.53	-1.3	0.56	0.41	0.52	-10.4	1.81	-5.26
	26	27	TRP	261	11.3	2.27	11.12	1.2	22.42	2.61	-6.29	0.93	-2.73	0.94	-9.02	1.41	3.82	1.69	-5.43	1.13	-1.61	2.32	8.83	2.92	2.95	1.61	11.79	3.63	-0.16	0.94	-1.08	0.53	-1.24	1.24	0.28	0.07	0	0	0.28	0.07	0.13	0.94	-1.08	0.53	-0.95	1.24	8.96	2.58	1.87
	27	28	LYS	262	11.16	2.2	12.4	1.58	23.56	2.84	-2.06	0.98	-0.88	0.83	-2.94	1.36	0.59	6.2	0.03	1.21	0.62	6.3	9.69	6.26	11.55	1.73	21.24	6.8	-26.95	6.08	-4.22	0.79	-31.16	6.03	0.74	0.08	0.12	0.03	0.86	0.08	-26.21	6.05	-4.09	0.78	-30.3	6.01	-16.52	2.29	7.46
	28	29	LYS	263	10.99	2.14	11.42	1.39	22.42	2.52	-2.07	0.67	-0.26	0.8	-2.34	1.13	4.52	4.2	-9.46	1.49	-4.94	4.43	13.44	4.57	1.7	1.82	15.14	4.9	-31.76	4.08	-4.44	0.85	-36.2	4.06	0.82	0.07	0.25	0.02	1.07	0.07	-30.94	4.06	-4.18	0.84	-35.13	4.04	-17.5	2.28	-2.48
	29	30	TYR	264	8.01	2.13	9.73	1.36	17.75	2.52	-0.07	0.73	0.12	0.73	0.05	1.07	-17.81	0.95	-8.4	0.89	-26.21	1.34	-9.87	2.65	1.45	1.49	-8.42	3.26	-4.79	0.74	-6.19	0.61	-10.98	1	0.84	0.06	0.19	0.02	1.03	0.07	-3.95	0.72	-6	0.61	-9.95	0.96	-13.82	2.37	-4.55
	30	31	SER	265	3.4	1.05	10.91	1.47	14.32	1.85	-0.15	0.38	-0.09	0.69	-0.24	0.9	-2.45	1.15	-3.34	1.52	-5.8	2.12	0.8	1.52	7.48	1.99	8.28	2.52	-3.12	1.03	-7.84	0.91	-10.96	1.47	0.54	0.03	0.16	0.03	0.71	0.05	-2.58	1.02	-7.67	0.9	-10.25	1.46	-1.78	1.18	-0.19
	31	32	LEU	266	8.86	1.87	10.9	1.35	19.76	2.14	-0.92	0.8	-0.79	0.76	-1.71	1.13	-25.35	0.46	-7.97	1.13	-33.32	1.23	-17.42	2.11	2.15	1.57	-15.27	2.5	1.42	0.28	-1.58	0.48	-0.17	0.48	0.59	0.08	0.02	0.01	0.61	0.08	2.01	0.3	-1.56	0.48	0.44	0.46	-15.41	2.12	0.59
	32	33	THR	267	6.32	1.47	10.13	1.27	16.45	2.04	-1.86	0.58	-1.41	0.61	-3.27	0.83	-22.38	1.45	-9.09	0.84	-31.47	1.76	-17.91	2.06	-0.37	1.54	-18.28	2.64	-1.47	1.01	-4.25	0.58	-5.72	1.11	0.38	0.06	0.04	0.02	0.42	0.06	-1.09	1.01	-4.21	0.57	-5.3	1.1	-19	1.7	-4.58
	33	34	VAL	268	5.8	1.52	9.8	1.22	15.6	2.14	-3.86	0.8	-1.68	0.83	-5.55	1.11	-18.17	0.45	-10.2	1.2	-28.37	1.24	-16.23	1.68	-2.08	1.63	-18.32	2.57	2.74	0.29	-4.17	0.67	-1.43	0.57	0	0.01	0	0	0	0.01	2.75	0.29	-4.17	0.67	-1.43	0.57	-13.49	1.72	-6.26
	34	35	ALA	269	2.68	0.77	10.09	1.19	12.77	1.5	-2.47	0.28	-3.31	0.86	-5.78	0.94	2.12	0.13	-6.61	0.81	-4.49	0.8	2.32	0.82	0.17	1.4	2.5	1.8	-0.03	0.05	-0.62	0.27	-0.65	0.28	0	0	0	0	0	0	-0.03	0.05	-0.62	0.27	-0.65	0.28	2.3	0.82	-0.45
	35	36	VAL	270	6.18	1.73	10.72	1.18	16.9	2.25	-3.6	0.68	-1.64	1.05	-5.23	1.34	-17.07	0.42	-6.61	0.82	-23.68	0.93	-14.49	1.89	2.47	1.42	-12.02	2.33	1.64	0.28	-2.04	0.4	-0.4	0.34	0	0.01	0	0	0	0.01	1.65	0.28	-2.04	0.4	-0.39	0.34	-12.84	1.83	0.43
	36	37	LYS	271	10.97	2.57	10.35	1.19	21.32	3.05	-4.46	1.09	-2.97	0.87	-7.43	1.47	-39.6	8.68	-9.67	0.95	-49.28	8.73	-33.09	9.19	-2.29	1.47	-35.38	9.33	12.44	7.43	-0.89	0.4	11.55	7.46	0.07	0.03	0	0	0.07	0.03	12.51	7.41	-0.89	0.4	11.62	7.45	-20.59	3.28	-3.18
	37	38	THR	272	5.99	1.32	9.91	1.21	15.91	1.81	-2.26	0.68	-1.39	0.69	-3.65	1.05	-22.79	1.55	-11.79	1.05	-34.58	1.51	-19.06	2.03	-3.27	1.65	-22.33	2.36	-0.93	1.07	-4.24	0.84	-5.16	1.19	0.16	0.04	0.02	0.02	0.17	0.05	-0.77	1.06	-4.22	0.84	-4.99	1.17	-19.83	1.5	-7.49
	38	39	LEU	273	8.86	2	10.58	1.41	19.45	2.49	-2.44	0.96	-0.96	0.69	-3.41	1.25	-25.32	0.48	6.34	1.18	-18.98	1.33	-18.9	2.3	15.96	1.71	-2.94	3.03	1.58	0.29	-6.41	1	-4.83	1.09	0.14	0.05	0.11	0.04	0.25	0.06	1.72	0.29	-6.3	0.99	-4.59	1.06	-17.18	2.31	9.65
	39	40	LYS	274	11.19	2.6	16.92	1.5	28.11	3.18	-0.49	0.86	-0.51	0.5	-1	1.03	6.05	6.4	-8.65	1.24	-2.6	6.88	16.75	6.47	7.76	1.72	24.51	7.22	-32.79	6.35	-5.39	1.05	-38.18	6.8	1.04	0.15	0.31	0.04	1.36	0.16	-31.74	6.31	-5.08	1.02	-36.83	6.75	-14.99	2.86	2.68
	40	41	ASP	276	4.24	1.49	13.91	1.3	18.15	2.11	-2.11	0.81	-0.4	0.86	-2.51	1.32	8.54	4	-7.93	2.81	0.62	6.31	10.67	3.6	5.58	3.1	16.25	6.08	-71.9	3.56	-8.43	2.5	-80.33	5.58	0.4	0.1	0.16	0.03	0.56	0.11	-71.49	3.62	-8.27	2.48	-79.76	5.62	-60.82	1.37	-2.69
	41	42	THR	277	6.65	1.29	11.13	1.49	17.78	2.19	-0.52	0.7	0.59	0.79	0.07	1.17	-21.59	1.82	-6.02	2.36	-27.61	2.61	-15.46	2.31	5.7	2.39	-9.76	3.36	-2.31	1.5	-8.21	1.54	-10.52	1.91	0.53	0.12	0.22	0.07	0.75	0.15	-1.78	1.48	-7.99	1.57	-9.77	1.88	-17.24	1.65	-2.29
	42	43	MET	278	6.63	1.69	10.95	1.42	17.57	2.35	-0.53	0.53	0.41	0.67	-0.12	0.95	-0.91	1.37	-1.41	1.39	-2.32	1.95	5.18	2.38	9.95	2.01	15.13	2.92	-0.17	1.33	-9.77	1.01	-9.94	1.85	1.08	0.1	0.25	0.04	1.33	0.11	0.91	1.29	-9.52	1.01	-8.61	1.82	6.09	1.72	0.43
	43	44	GLU	279	6.27	1.84	9.64	1.14	15.91	2.21	-1.87	0.78	-0.45	0.96	-2.32	1.51	21.2	6.12	-3.31	1.73	17.89	7.11	25.6	6.09	5.88	1.7	31.48	6.68	-82.39	5.92	-5.39	1.01	-87.78	6.29	0.54	0.11	0.07	0.02	0.61	0.11	-81.85	5.98	-5.32	1.01	-87.17	6.35	-56.25	1.83	0.56
	44	45	VAL	280	6.16	1.66	10.91	1.51	17.08	2.19	-0.88	0.87	-0.27	1.02	-1.14	1.39	-19.53	0.63	-16.01	1.4	-35.54	1.4	-14.25	1.8	-5.37	1.65	-19.61	2.23	4.32	0.64	-1.48	0.68	2.84	0.74	0.39	0.07	0	0	0.39	0.07	4.7	0.66	-1.47	0.68	3.23	0.72	-9.54	1.68	-6.84
	45	46	GLU	281	6.29	1.89	10.79	1.48	17.08	2.47	-0.9	0.59	-0.74	0.89	-1.63	1.21	23.22	8.31	-13.84	1.57	9.38	8.57	28.61	8.25	-3.79	1.81	24.82	8.08	-86.92	7.85	-1.51	1.01	-88.43	8.25	0.84	0.07	0.03	0.02	0.87	0.07	-86.08	7.82	-1.48	1	-87.57	8.21	-57.47	1.87	-5.27
	46	47	GLU	282	6.79	2.21	10.53	1.24	17.32	2.67	-1.07	0.66	-1.1	0.69	-2.17	1.1	-1.4	9.82	-6.54	1.12	-7.94	9.73	4.32	9.67	2.89	1.58	7.21	9.84	-61.16	10.03	-4	0.91	-65.16	9.84	0.78	0.18	0.04	0.02	0.82	0.18	-60.38	9.91	-3.96	0.92	-64.34	9.71	-56.06	2.33	-1.07
	47	48	PHE	283	8.22	1.89	10.81	1.18	19.03	2.36	-4.58	0.69	-2.34	0.76	-6.91	1.17	1.42	0.34	-7.87	0.87	-6.45	0.93	5.06	2.06	0.61	1.48	5.66	2.8	-0.68	0.25	-0.03	0.55	-0.7	0.66	0.06	0.03	0.01	0.01	0.07	0.04	-0.62	0.24	-0.02	0.55	-0.63	0.65	4.44	2.01	0.59
	48	49	LEU	284	9	1.93	11.44	1.3	20.44	2.24	-1.71	0.85	-1.45	0.72	-3.16	1.17	-25.13	0.4	-2.56	1.16	-27.7	1.19	-17.84	2.27	7.43	1.65	-10.41	2.61	1.6	0.31	-0.72	0.87	0.88	0.85	0.43	0.07	0.05	0.02	0.48	0.06	2.03	0.29	-0.67	0.86	1.36	0.86	-15.81	2.22	6.76
	49	50	LYS	285	11.82	2.36	11.65	1.33	23.47	2.87	-1.17	0.7	-1.01	0.83	-2.19	1.06	-1.89	11.19	-15.3	1.34	-17.18	10.7	8.76	11.53	-4.66	2.11	4.1	11.14	-24.87	10.84	1.12	0.99	-23.75	10.26	1.04	0.09	0.02	0.01	1.06	0.09	-23.83	10.78	1.15	0.99	-22.68	10.19	-15.07	2.54	-3.51
	50	51	GLU	286	6.59	1.84	11.38	1.34	17.97	2.35	-2.48	1.1	-1.78	0.83	-4.26	1.45	-29.84	6.27	-16.85	1.19	-46.69	6.24	-25.72	6.22	-7.25	1.53	-32.97	6.36	-29.59	5.65	-1.02	0.77	-30.6	5.55	0.13	0.04	0.02	0.01	0.15	0.04	-29.46	5.67	-1	0.77	-30.45	5.57	-55.18	1.76	-8.25
	51	52	ALA	287	2.88	1	11.19	1.51	14.07	2.09	-1.8	0.33	-2.74	0.66	-4.54	0.77	2.08	0.13	-9.63	1.08	-7.54	1.13	3.16	1.03	-1.17	1.8	1.98	2.3	-0.14	0.08	0.59	0.75	0.44	0.79	0.02	0.01	0	0	0.02	0.01	-0.13	0.08	0.59	0.76	0.46	0.79	3.03	1.03	-0.59
	52	53	ALA	288	2.82	0.79	11.41	1.45	14.22	1.74	-1	0.24	-1.99	0.75	-2.99	0.78	2.13	0.13	-3.64	1.32	-1.51	1.35	3.95	0.81	5.77	1.82	9.72	2.09	-0.14	0.08	-3.31	1.23	-3.45	1.25	0.31	0.03	0.06	0.02	0.37	0.04	0.18	0.11	-3.25	1.22	-3.08	1.25	4.12	0.8	2.52
	53	54	VAL	289	6.35	1.49	11.6	1.44	17.95	2.18	-1.75	0.71	-0.56	0.87	-2.31	1.12	-15.67	0.71	-11.23	1.16	-26.89	1.04	-11.07	1.56	-0.18	1.8	-11.25	2.3	0.63	0.52	-3.29	0.8	-2.65	0.61	0.18	0.09	0.01	0.01	0.2	0.09	0.82	0.57	-3.27	0.8	-2.46	0.62	-10.25	1.55	-3.46
	54	55	MET	290	7.6	1.7	11.04	1.22	18.65	2.13	-6.47	0.65	-2.29	0.66	-8.76	0.92	-0.29	0.53	-1.25	1.07	-1.54	1.2	0.84	1.77	7.5	1.42	8.34	1.95	0.16	0.43	-4.3	0.83	-4.14	0.87	0.01	0.01	0.01	0.01	0.02	0.02	0.18	0.43	-4.29	0.83	-4.12	0.87	1.02	1.71	3.21
	55	56	LYS	291	11.76	2.26	10.47	1.5	22.23	2.89	-3.79	0.76	-1.22	0.77	-5.01	1.1	9.19	4.09	-10.48	1.47	-1.29	4.41	17.16	4.94	-1.22	1.78	15.94	5.31	-33.78	4.15	-2.57	1.14	-36.35	4.32	0.46	0.07	0.1	0.04	0.56	0.08	-33.32	4.12	-2.47	1.13	-35.79	4.29	-16.16	2.58	-3.69
	56	57	GLU	292	6.64	1.98	10.76	1.43	17.4	2.43	-1.17	0.82	-0.35	0.81	-1.52	1.26	-12.41	9.59	-11.82	1.62	-24.22	10.1	-6.94	9.77	-1.41	2.31	-8.35	10.39	-51.24	9.29	-4.07	1.6	-55.31	9.92	0.66	0.11	0.13	0.06	0.79	0.12	-50.58	9.22	-3.94	1.58	-54.52	9.84	-57.52	1.61	-5.35
	57	58	ILE	293	9.68	1.98	10.72	1.38	20.39	2.48	-2.69	1.07	-0.24	0.84	-2.93	1.56	-3.63	0.38	2.74	1.22	-0.89	1.33	3.36	2.15	13.21	1.74	16.57	2.89	1.41	0.33	-6.52	1.09	-5.12	1.13	0.04	0.03	0.03	0.02	0.07	0.04	1.45	0.32	-6.49	1.08	-5.04	1.11	4.81	2.09	6.72
	58	59	LYS	294	10.72	2.5	10.66	1.2	21.39	2.79	-0.52	0.97	-0.91	0.62	-1.43	1.29	7.35	4.64	-2.32	1.24	5.03	4.54	17.55	5.45	7.44	1.51	24.99	5.51	-33.75	5.1	-3.31	0.87	-37.06	4.93	1.07	0.21	0.1	0.02	1.17	0.22	-32.68	5	-3.21	0.86	-35.89	4.82	-15.13	2.67	4.23
	59	60	HIS	295	24.79	1.55	11.39	1.28	36.18	1.91	-6.49	0.83	-0.6	0.66	-7.09	1.13	-14.38	1.11	-1.7	1.06	-16.08	1.61	3.92	2	9.09	1.51	13.01	2.48	-0.67	0.89	-3.33	0.78	-4	1.31	0.2	0.03	0.06	0.03	0.26	0.04	-0.47	0.88	-3.28	0.77	-3.75	1.3	3.45	1.75	5.81
	60	61	PRO	296	11.96	1.44	13.84	1.29	25.8	2.24	-1.06	0.5	-1.43	0.62	-2.49	0.81	-5.07	0.86	-3.77	1.18	-8.84	0.95	5.83	1.74	8.64	1.59	14.47	2.48	4.45	0.81	-6.81	1	-2.36	0.77	0.68	0.03	0.09	0.03	0.77	0.03	5.13	0.8	-6.72	0.99	-1.59	0.76	10.96	1.58	1.92
	61	62	ASN	297	11.64	1.82	10.33	1.4	21.97	2.36	-4.24	0.71	-1.33	1.05	-5.57	1.22	-81.07	1.15	-8.28	0.99	-89.34	1.53	-73.67	1.96	0.73	1.63	-72.94	2.56	-4.28	0.79	-0.6	0.33	-4.88	0.85	0.13	0.02	0	0	0.13	0.02	-4.15	0.79	-0.6	0.33	-4.75	0.84	-77.82	1.8	0.13
	62	63	LEU	298	8.7	1.89	10.03	1.16	18.74	2.3	-3.28	0.97	-1.89	0.89	-5.17	1.38	-25.57	0.43	-2.42	1.64	-27.99	1.57	-20.14	2.31	5.72	2.04	-14.42	2.95	2.07	0.27	-3.92	0.92	-1.85	0.85	0.05	0.02	0	0	0.05	0.03	2.12	0.27	-3.92	0.92	-1.8	0.85	-18.02	2.27	1.81
	63	64	VAL	299	5.91	1.55	10.49	1.43	16.39	2.12	-3.44	0.7	-1.4	0.71	-4.84	1.03	-19.03	0.48	-9.41	0.86	-28.44	1.02	-16.56	1.77	-0.33	1.58	-16.89	2.24	3.98	0.29	-5.65	0.55	-1.68	0.5	0	0	0.02	0.02	0.02	0.02	3.98	0.29	-5.63	0.56	-1.65	0.51	-12.58	1.76	-5.96
	64	65	GLN	300	13.72	2.02	10.9	1.19	24.61	2.39	-2.53	0.68	-2.1	0.75	-4.63	1.13	-63.97	4.92	-6.22	1.11	-70.19	5.11	-52.78	5.14	2.57	1.35	-50.21	5.17	-8.58	4.4	-3.55	0.56	-12.13	4.53	0.52	0.11	0.02	0.01	0.54	0.11	-8.06	4.35	-3.53	0.57	-11.59	4.48	-60.84	1.99	-0.96
	65	66	LEU	301	9.07	1.95	10.72	1.33	19.78	2.41	-3.84	0.93	-1.92	0.65	-5.76	1.19	-24.56	0.38	-0.78	1.4	-25.34	1.42	-19.33	2.11	8.02	1.84	-11.32	2.73	0.76	0.29	-3.86	1.28	-3.1	1.18	0.01	0.01	0.07	0.04	0.08	0.05	0.77	0.29	-3.8	1.27	-3.02	1.16	-18.56	2.12	4.22
	66	67	LEU	302	8.63	2.05	10.61	1.32	19.24	2.47	-2.72	0.91	-1.02	0.77	-3.74	1.25	-24.75	0.43	-6.1	0.79	-30.85	0.84	-18.85	2.22	3.49	1.55	-15.36	2.93	1.21	0.31	-3.02	0.72	-1.81	0.63	0.17	0.07	0.14	0.03	0.31	0.07	1.38	0.31	-2.88	0.7	-1.5	0.62	-17.47	2.22	0.61
	67	68	GLY	303	0	0	7.95	1.38	7.95	1.38	0	0	-3.55	0.87	-3.55	0.87	0	0	-8.63	0.84	-8.63	0.84	0	0	-4.23	1.53	-4.23	1.53	0	0	-2.54	0.45	-2.54	0.45	0	0	0	0	0	0	0	0	-2.54	0.45	-2.54	0.45	0	0	-6.76
	68	69	VAL	304	6	1.6	9.98	1.61	15.98	2.28	-3.12	0.93	-1.52	1.03	-4.64	1.63	-15.94	0.5	-13.72	1.05	-29.66	1.08	-13.06	1.81	-5.26	1.97	-18.32	2.62	0.63	0.34	-1.42	0.65	-0.79	0.54	0	0.01	0	0	0	0.01	0.63	0.34	-1.42	0.65	-0.79	0.54	-12.43	1.71	-6.68
	69	70	CYS	305	3.13	1.02	11.49	1.1	14.62	1.66	-3.42	0.56	-2.42	0.84	-5.83	1.1	4.94	0.58	-10.92	0.99	-5.98	1.26	4.66	1.21	-1.85	1.49	2.81	2.1	-0.32	0.32	0.83	0.56	0.51	0.62	0.01	0.01	0	0	0.01	0.01	-0.31	0.32	0.83	0.56	0.52	0.62	4.35	1.1	-1.02
	70	71	THR	306	6.81	1.45	11.27	1.27	18.08	1.8	-1.63	0.88	-0.59	0.79	-2.21	1.29	-27.84	1.49	-4.68	0.93	-32.51	1.98	-22.65	1.84	6.01	1.17	-16.64	2.07	1.26	0.92	-4.93	0.48	-3.67	1.12	0.11	0.04	0.1	0.02	0.21	0.04	1.38	0.89	-4.83	0.48	-3.46	1.1	-21.27	1.58	1.17
	71	72	ARG	307	13.53	2.71	10.8	1.42	24.32	3.45	-0.98	1.17	-0.2	0.7	-1.18	1.38	-203.08	13.44	-7.66	1.34	-210.74	13.37	-190.53	13.02	2.94	1.75	-187.59	12.91	10	9.98	-5.52	0.63	4.48	9.85	0.85	0.16	0.27	0.02	1.11	0.15	10.84	9.86	-5.26	0.63	5.59	9.74	-179.69	3.99	-2.31
	72	73	GLU	308	7.45	2.42	11.14	1.18	18.59	2.79	-1.66	1.01	0.36	0.99	-1.3	1.55	-30.16	9.01	-4.75	1.42	-34.91	9.15	-24.36	9.4	6.75	1.93	-17.62	9.43	-33.41	8.05	-3.69	0.84	-37.1	8.08	0.48	0.05	0.02	0.01	0.5	0.05	-32.93	8.02	-3.66	0.84	-36.6	8.04	-57.3	2.76	3.08
	73	74	PRO	309	12.32	1.69	13.98	1.33	26.31	2.48	-1.29	0.43	-0.27	0.67	-1.56	0.78	-3.73	0.63	8.69	0.87	4.97	0.9	7.31	1.89	22.4	1.74	29.71	2.79	3.24	0.61	-9.2	0.72	-5.96	0.77	0.62	0.05	0.11	0.02	0.72	0.05	3.86	0.6	-9.1	0.72	-5.24	0.76	11.17	1.78	13.3
	74	75	PRO	310	12.27	1.66	12.98	1.17	25.24	2.24	-1.42	0.42	-0.98	1.01	-2.4	1.11	-1.8	0.68	-8.46	1.45	-10.26	1.33	9.05	1.9	3.54	1.69	12.59	2.37	1.13	0.63	-2.73	0.78	-1.6	0.69	0.54	0.05	0.03	0.01	0.57	0.05	1.68	0.62	-2.71	0.77	-1.03	0.69	10.73	1.76	0.83
	75	76	PHE	311	8.22	2.2	9.78	1.33	18	2.72	-3.05	0.79	-2.31	0.7	-5.36	1.1	0.42	0.32	-6.6	1.12	-6.19	1.1	5.59	2.3	0.86	1.55	6.45	2.86	-0.47	0.29	-2.35	0.63	-2.82	0.66	0.2	0.06	0.01	0.01	0.21	0.06	-0.27	0.28	-2.34	0.62	-2.6	0.66	5.32	2.24	-1.48
	76	77	TYR	312	8.23	1.93	9.85	1.64	18.08	2.73	-3.59	0.54	-2.89	0.73	-6.49	0.87	-16.33	0.85	-7.74	0.87	-24.07	1.2	-11.69	2.03	-0.78	1.54	-12.48	2.54	-4.58	0.55	-0.63	0.34	-5.21	0.69	0.28	0.05	0	0	0.28	0.05	-4.3	0.52	-0.63	0.34	-4.93	0.66	-15.99	1.94	-1.41
	77	78	ILE	313	8.86	1.72	10.35	0.99	19.22	2.02	-3.97	1.06	-1.98	0.76	-5.95	1.3	-2.95	0.29	-7.88	0.75	-10.83	0.68	1.94	1.85	0.5	1.2	2.44	2.21	1.15	0.26	-1.96	0.37	-0.81	0.25	0	0	0	0	0	0	1.15	0.26	-1.96	0.37	-0.81	0.25	3.09	1.83	-1.46
	78	79	ILE	314	10.22	1.96	10.48	1.33	20.7	2.46	-4.6	1.09	-1.77	0.93	-6.37	1.5	-3.28	0.28	-13.91	0.9	-17.19	0.88	2.34	1.99	-5.2	1.48	-2.86	2.5	1.33	0.24	-0.75	0.38	0.58	0.28	0	0.01	0	0	0	0.01	1.34	0.24	-0.75	0.38	0.58	0.28	3.67	1.97	-5.95
	79	80	THR	315	5.98	1.28	10.61	1.3	16.59	1.97	-4	0.73	-2.59	0.84	-6.59	1.18	-25.57	1.04	-15.98	1.02	-41.55	1.5	-23.59	1.58	-7.96	1.59	-31.55	2.43	2.11	0.28	-1.35	0.44	0.76	0.52	0	0	0	0	0	0	2.11	0.28	-1.35	0.44	0.76	0.52	-21.48	1.47	-9.31
	80	81	GLU	316	5.93	1.86	9.9	1.28	15.84	2.42	-2.65	1.11	-1.8	0.79	-4.45	1.52	-18.5	6	-3.22	1.23	-21.72	5.96	-15.22	6.25	4.89	1.46	-10.33	6.5	-43.24	4.79	-5.4	0.74	-48.64	4.89	0.18	0.05	0.01	0.01	0.19	0.05	-43.06	4.78	-5.39	0.74	-48.45	4.88	-58.28	2.43	-0.5
	81	82	PHE	317	7.52	1.9	9.81	1.14	17.33	2.23	-2.67	0.62	-1.72	0.59	-4.39	0.85	1.1	0.43	-4.01	0.87	-2.92	0.94	5.94	2.17	4.08	1.37	10.02	2.65	-1.27	0.44	-4.38	0.63	-5.65	0.77	0.37	0.06	0.11	0.02	0.49	0.06	-0.9	0.4	-4.27	0.63	-5.16	0.76	5.05	2.11	-0.18
	82	83	MET	318	7.1	1.9	11.16	1.36	18.25	2.44	-6.33	0.79	-2.09	0.66	-8.42	1.13	-2.38	0.76	-4.76	1	-7.14	1.23	-1.62	2.21	4.31	1.47	2.69	2.79	2.3	0.65	-4.54	0.63	-2.24	0.9	0.04	0.01	0.02	0.01	0.06	0.02	2.34	0.65	-4.52	0.63	-2.18	0.89	0.72	1.93	-0.21
	83	84	THR	319	6.22	1.32	12.49	1.4	18.71	1.89	-0.85	0.87	-0.48	0.71	-1.33	1.38	-28.73	4.21	-7.6	1	-36.33	4.44	-23.36	4.28	4.4	1.39	-18.95	4.55	2.91	2.22	-8.77	0.64	-5.86	2.26	0.41	0.07	0.19	0.03	0.61	0.08	3.32	2.18	-8.58	0.63	-5.26	2.22	-20.03	2.39	-4.18
	84	85	TYR	320	8.75	2.02	9.02	1.35	17.77	2.68	-0.8	0.7	-0.81	0.73	-1.6	1.02	-18.79	2.91	-1.47	0.92	-20.26	2.97	-10.84	3.26	6.74	1.45	-4.1	3.5	-3.76	1.69	-8.01	0.81	-11.77	1.69	0.69	0.1	0.14	0.03	0.82	0.09	-3.07	1.64	-7.88	0.8	-10.95	1.65	-13.91	2.35	-1.14
	85	86	GLY	321	0	0	8.09	1.57	8.09	1.57	0	0	-2.28	0.85	-2.28	0.85	0	0	-7.32	1.12	-7.32	1.12	0	0	-1.51	1.65	-1.51	1.65	0	0	-3.67	0.8	-3.67	0.8	0	0	0.12	0.03	0.12	0.03	0	0	-3.56	0.8	-3.56	0.8	0	0	-5.07
	86	87	ASN	322	11.75	1.87	10.41	1.44	22.16	2.41	-4.38	0.55	-2.67	0.73	-7.05	0.96	-78.35	1.67	-0.4	1.55	-78.76	2.49	-70.98	2.27	7.34	1.78	-63.64	3.02	-5.65	1.3	-6.14	0.97	-11.78	1.86	0.09	0.03	0.01	0.01	0.09	0.03	-5.56	1.3	-6.13	0.97	-11.69	1.86	-76.54	1.83	1.21
	87	88	LEU	323	8.46	1.92	11.8	1.38	20.26	2.4	-4.57	0.79	-2.7	0.81	-7.28	1.22	-27.51	0.34	-0.73	0.86	-28.24	0.88	-23.63	2	8.37	1.44	-15.26	2.45	3.79	0.2	-7.24	0.52	-3.44	0.47	0	0	0	0	0	0	3.8	0.2	-7.24	0.52	-3.44	0.47	-19.84	2.01	1.13
	88	89	LEU	324	8.51	1.78	11.78	1.23	20.29	2.52	-2.25	0.8	-2.58	0.86	-4.83	1.31	-27.41	0.45	-4.96	0.93	-32.38	1.02	-21.16	1.9	4.24	1.63	-16.92	2.72	3.41	0.31	-6.94	0.55	-3.53	0.56	0.33	0.04	0	0	0.33	0.04	3.74	0.3	-6.94	0.55	-3.2	0.56	-17.42	1.88	-2.7
	89	90	ASP	325	4.42	1.62	10.69	1.29	15.11	2.11	-1.98	0.44	-1.99	0.82	-3.98	1.03	40.33	5.44	4.09	2.45	44.42	6.25	42.77	5.72	12.79	2.79	55.56	6.98	-104.02	5.19	-18.73	2.13	-122.76	5.77	0.49	0.07	0.02	0.02	0.51	0.06	-103.54	5.19	-18.71	2.13	-122.25	5.77	-60.76	1.49	-5.93
	90	91	TYR	326	8.82	2.09	11.41	1.2	20.23	2.54	-4.32	0.66	-2.13	0.79	-6.45	0.93	-19.41	1.13	-4.03	1.51	-23.44	1.87	-14.92	2.57	5.25	1.75	-9.66	3.21	-1.2	0.83	-5.2	0.8	-6.4	1.05	0.15	0.05	0.02	0.02	0.17	0.06	-1.04	0.81	-5.19	0.79	-6.23	1.03	-15.96	2.38	0.07
	91	92	LEU	327	8.95	1.84	11.6	1.46	20.56	2.49	-4.79	0.91	-2.23	0.72	-7.02	1.19	-27.89	0.43	3.96	1.59	-23.93	1.49	-23.73	2.08	13.33	2.03	-10.39	2.92	4.51	0.26	-6.06	1.08	-1.55	0.98	0	0	0.01	0.01	0.01	0.01	4.51	0.26	-6.05	1.07	-1.54	0.97	-19.21	2.02	7.28
	92	93	ARG	328	12.67	2.91	10.41	1.55	23.09	3.3	-2.8	1.1	-0.39	0.66	-3.19	1.33	-216.22	4.79	-11.02	1	-227.24	4.63	-206.35	5.41	-0.99	1.61	-207.35	5.35	29.64	4.61	-3.36	0.61	26.28	4.5	0.88	0.1	0.23	0.03	1.12	0.11	30.52	4.56	-3.13	0.6	27.39	4.46	-175.83	2.72	-4.12
	93	94	GLU	329	6.12	1.84	10.28	1.56	16.41	2.48	-1.13	0.75	0.59	0.81	-0.53	1.19	58.8	4.34	-5.79	1.13	53.02	4.5	63.8	4.51	5.09	1.63	68.89	4.55	-120.75	3.87	-12.61	0.84	-133.35	4.14	0.77	0.07	0.25	0.02	1.02	0.07	-119.97	3.89	-12.36	0.84	-132.33	4.16	-56.18	1.78	-7.26
	94	95	CYS	330	3.47	1	9.67	1.41	13.14	1.85	-3.37	0.63	-0.58	0.74	-3.95	1.1	5.65	1.02	-6.99	1.27	-1.34	1.62	5.74	1.45	2.11	1.66	7.86	2.27	-1.1	0.68	-0.96	1.11	-2.05	1.28	0	0.01	0.11	0.03	0.11	0.03	-1.09	0.68	-0.85	1.1	-1.94	1.27	4.65	1.21	1.26
	95	96	ASN	331	11.31	1.87	10.55	1.23	21.87	2.11	-1.52	0.72	-0.85	0.83	-2.37	1.24	-83.68	2.32	0.59	1.39	-83.09	3.08	-73.88	2.97	10.29	1.67	-63.59	3.79	-3.88	2.02	-3.98	0.76	-7.86	2.42	0.56	0.06	0.1	0.02	0.66	0.06	-3.32	1.98	-3.89	0.76	-7.21	2.39	-77.2	1.71	6.41
	96	97	ARG	332	13.38	2.78	10.93	1.42	24.3	3.27	-3.44	0.89	-0.85	0.69	-4.3	1.24	-214.7	4.33	-2.13	1.24	-216.83	4.2	-204.77	5.34	7.94	1.73	-196.83	5.02	30.18	4.5	-7.09	0.99	23.09	4.32	0.95	0.09	0.14	0.03	1.09	0.09	31.13	4.45	-6.96	0.99	24.18	4.28	-173.64	2.58	0.99
	97	98	GLN	333	14.07	2.43	10.09	1.46	24.16	2.94	-0.22	0.65	0.82	0.87	0.6	1.25	-63.39	1.54	-11.26	1.01	-74.65	2.09	-49.54	2.18	-0.35	1.64	-49.9	2.77	-11.72	0.98	-6.47	0.97	-18.19	1.59	1.04	0.04	0.24	0.05	1.28	0.06	-10.67	0.97	-6.23	0.95	-16.9	1.57	-60.22	2.02	-6.58
	98	99	GLU	334	6.61	1.98	11.06	1.23	17.66	2.37	-1.44	0.64	-0.52	0.64	-1.96	1	35.87	3.95	0.3	1.64	36.17	4.06	41.04	4.47	10.84	2	51.87	4.69	-98.32	3.97	-9.97	1.25	-108.29	4.12	0.66	0.1	0.11	0.03	0.77	0.11	-97.66	3.95	-9.87	1.24	-107.52	4.1	-56.62	1.95	0.97
	99	100	VAL	335	6.22	1.56	10.27	1.35	16.49	2.07	-2.91	0.93	-1.07	0.75	-3.98	1.36	-21.66	0.49	-2.72	1.15	-24.38	1.26	-18.35	1.78	6.49	1.69	-11.86	2.47	6.43	0.34	-9.5	1.05	-3.08	1.02	0	0.01	0.01	0.01	0.01	0.02	6.43	0.34	-9.5	1.04	-3.07	1.01	-11.92	1.72	-3.01
	100	101	ASN	336	11.06	1.88	10.19	1.18	21.25	2.46	-1.81	0.77	-0.35	0.95	-2.16	1.38	-81.4	2.62	-7.75	1.31	-89.15	3.35	-72.14	2.7	2.09	1.77	-70.05	3.83	-4.99	2.1	-3.38	0.6	-8.37	2.45	0.5	0.06	0.03	0.02	0.53	0.06	-4.49	2.07	-3.35	0.6	-7.85	2.41	-76.63	1.64	-1.26
	101	102	ALA	337	2.86	0.81	11.44	1.39	14.29	1.69	-0.86	0.25	-1.72	0.64	-2.58	0.69	2.21	0.13	-3.54	0.82	-1.34	0.85	4.2	0.85	6.17	1.36	10.38	1.69	-0.22	0.06	-3.6	0.53	-3.82	0.55	0.22	0.07	0.07	0.02	0.29	0.08	-0.01	0.08	-3.53	0.53	-3.54	0.54	4.2	0.86	2.64
	102	103	VAL	338	6.3	1.5	10.75	1.4	17.05	2.14	0.22	0.7	-0.38	0.85	-0.16	1.19	-20.53	0.54	-4.8	1.06	-25.33	1.21	-14.01	1.62	5.57	1.72	-8.44	2.49	5.3	0.4	-7.99	0.68	-2.69	0.71	0.66	0.06	0.01	0.01	0.67	0.06	5.97	0.4	-7.98	0.67	-2.02	0.69	-8.04	1.62	-2.41
	103	104	VAL	339	6.03	1.69	11.23	1.23	17.26	2.34	-2.65	0.7	-0.65	0.92	-3.31	1.18	-21.08	0.48	-6.83	0.97	-27.92	1.13	-17.71	1.89	3.75	1.54	-13.96	2.73	6.15	0.32	-7.26	0.38	-1.11	0.43	0.14	0.04	0.01	0.01	0.16	0.04	6.29	0.32	-7.25	0.39	-0.96	0.43	-11.42	1.78	-3.5
	104	105	LEU	340	9.44	2.24	11.41	1.29	20.86	2.7	-3.45	0.91	-2.35	0.87	-5.79	1.36	-27.06	0.45	-3.39	1.05	-30.45	1.1	-21.06	2.5	5.68	1.56	-15.39	3.11	3.79	0.28	-5.14	0.35	-1.35	0.45	0.08	0.03	0.01	0.01	0.09	0.03	3.87	0.28	-5.13	0.35	-1.25	0.45	-17.19	2.45	0.55
	105	106	LEU	341	9.16	1.97	11.48	1.27	20.64	2.57	-2.46	0.96	-1.33	0.97	-3.79	1.47	-27.76	0.45	-8.96	1.14	-36.72	1.23	-21.06	2.17	1.19	1.46	-19.87	2.78	3.98	0.3	-4.92	0.4	-0.94	0.46	0.12	0.04	0.01	0.01	0.14	0.04	4.1	0.3	-4.91	0.4	-0.81	0.46	-16.95	2.1	-3.72
	106	107	TYR	342	8.9	1.91	11.12	1.4	20.02	2.48	-2.37	0.54	-2.96	0.78	-5.33	1.04	-19.39	0.6	-11.13	0.99	-30.52	1.22	-12.86	2.2	-2.97	1.61	-15.83	2.82	-2.62	0.52	-1.86	0.34	-4.48	0.63	0.56	0.08	0	0	0.56	0.08	-2.06	0.48	-1.86	0.34	-3.92	0.6	-14.92	2.07	-4.83
	107	108	MET	343	7.06	1.59	11.45	1.34	18.51	2.25	-6.51	0.59	-3.25	0.74	-9.76	0.97	-3.05	0.31	-8.46	0.94	-11.51	0.97	-2.5	1.77	-0.26	1.56	-2.76	2.45	2.99	0.22	-3.01	0.4	-0.02	0.41	0	0	0	0	0	0	2.99	0.22	-3.01	0.4	-0.02	0.41	0.49	1.73	-3.27
	108	109	ALA	344	2.8	0.8	11.17	1.22	13.97	1.52	-1.91	0.28	-3.23	0.82	-5.14	0.81	2.22	0.13	-11.29	1.43	-9.07	1.48	3.11	0.87	-3.35	1.6	-0.24	1.93	-0.28	0.05	-0.03	0.36	-0.31	0.38	0.01	0.01	0	0	0.01	0.01	-0.27	0.05	-0.03	0.36	-0.3	0.38	2.85	0.87	-3.39
	109	110	THR	345	6.12	1.32	11.24	1.3	17.36	1.92	-2.4	0.86	-1.7	0.9	-4.09	1.4	-24.55	0.86	-12.62	1.47	-37.17	1.56	-20.82	1.51	-3.07	1.85	-23.9	2.24	1.49	0.47	-3.77	0.51	-2.28	0.6	0.15	0.05	0	0	0.15	0.05	1.64	0.46	-3.77	0.51	-2.13	0.61	-19.18	1.51	-6.85
[truncated: 688 more rows]
[truncated: 3 more columns]

## Sheet: wt_methacholine
=>>	COMPLEX
	Number	Residue	Residue Name	Residue ID	SINT		BINT		TINT		SVDW		BVDW		TVDW		SELE		BELE		TELE		SGAS		BGAS		TGAS		SGB		BGB		TGB		SGBSUR		BGBSUR		TGBSUR		SGBSOL		BGBSOL		TGBSOL		SGBTOT		BGBTOT
[truncated: 798 more rows]
[truncated: 3 more columns]

## Sheet: wt_nilotinib
=>>	COMPLEX
[truncated: 799 more rows]
[truncated: 3 more columns]

## Sheet: wt_sorafenib
=>>	COMPLEX
[truncated: 799 more rows]
[truncated: 3 more columns]
