# Supplementary material for: In silico identification of novel kinase inhibitors targeting wild-type and T315I mutant ABL1 from FDA-approved drugs
Source: Royal Society of Chemistry journal article supplement (doi:10.1039/c3mb70577c), 2014-02-18
Supplement: c3mb70577c8.xlsx [file c3mb70577c8.xlsx]

## Sheet: Abbreviation
ELE	- non-bonded electrostatic energy + 1,4-electrostatic energy
VDW	- non-bonded van der Waals energy + 1,4-van der Waals energy
INT	- bond, angle, dihedral energies
GAS	- ELE + VDW + INT
PBSUR	- hydrophobic contrib. to solv. free energy for PB calculations
PBCAL	- reaction field energy calculated by PB
PBSOL	- PBSUR + PBCAL
PBELE	- PBCAL + ELE
PBTOT	- PBSOL + GAS
GBSUR	- hydrophobic contrib. to solv. free energy for GB calculations
GB	- reaction field energy calculated by GB
GBSOL	- GBSUR + GB
GBELE	- GB + ELE
GBTOT	- GBSOL + GAS
TSTRA	- translational entropy (as calculated by nmode) times temperature
TSROT	- rotational entropy (as calculated by nmode) times temperature
TSVIB	- vibrational entropy (as calculated by nmode) times temperature
*** Prefixes in front of abbreviations for energy decomposition ***
"T" - energy part due to Total residue
"S" - energy part due to Sidechain atoms
"B" - energy part due to Backbone atoms

## Sheet: T315I_bethanechol
=>>	COMPLEX
	Number	Residue	Residue Name	Residue ID	SINT		BINT		TINT		SVDW		BVDW		TVDW		SELE		BELE		TELE		SGAS		BGAS		TGAS		SGB		BGB		TGB		SGBSUR		BGBSUR		TGBSUR		SGBSOL		BGBSOL		TGBSOL		SGBTOT		BGBTOT
	0	1	ASP	233	5.12	1.45	3.88	0.88	9	1.98	-0.99	1.03	-0.23	0.52	-1.22	1.33	-65.11	6.35	-17.06	1.91	-82.17	6.88	-60.98	6.36	-13.41	1.98	-74.39	6.98	-56.49	6.06	-6.58	1.69	-63.07	6.4	0.96	0.06	0.14	0.04	1.1	0.08	-55.53	6.05	-6.43	1.7	-61.97	6.39	-116.52	1.79	-19.84
	1	2	LYS	234	11.45	2.49	10.5	1.37	21.95	2.87	-0.3	0.86	0	0.79	-0.29	1.37	14.45	4.29	-2.86	1.09	11.59	4.58	25.61	4.85	7.64	1.52	33.25	5.11	-41.63	4.22	-5.93	1.11	-47.56	4.55	1.17	0.12	0.27	0.04	1.44	0.12	-40.46	4.2	-5.66	1.09	-46.12	4.53	-14.85	2.52	1.98
	2	3	TRP	235	11.1	2.36	10.51	1.48	21.61	2.73	-5.81	0.79	-0.98	0.85	-6.79	1.22	10.85	1.44	-16.24	1.19	-5.39	1.87	16.14	2.6	-6.71	1.86	9.43	3.16	-5.94	1.16	-2.71	0.69	-8.66	1.37	0.43	0.11	0.03	0.02	0.46	0.11	-5.51	1.19	-2.68	0.69	-8.19	1.39	10.63	2.55	-9.39
	3	4	GLU	236	7.08	1.83	10.36	1.35	17.44	2.59	-2.69	1.19	-0.84	0.85	-3.53	1.5	-9.95	6.58	-5.68	1.76	-15.63	6.74	-5.57	6.61	3.85	1.99	-1.72	6.67	-49.81	6.4	-6.69	1.3	-56.5	6.5	0.16	0.08	0.14	0.04	0.3	0.08	-49.65	6.36	-6.56	1.28	-56.2	6.47	-55.22	2.01	-2.71
	4	5	MET	237	7.2	1.52	10.24	1.41	17.44	2.04	-6.15	0.67	-0.78	0.78	-6.93	1.07	-1.63	0.48	-6.37	1.45	-8	1.44	-0.58	1.66	3.1	1.98	2.52	2.39	1.29	0.44	-4.85	1.11	-3.56	1.13	0.06	0.03	0.06	0.02	0.13	0.04	1.35	0.44	-4.78	1.11	-3.44	1.12	0.77	1.62	-1.69
	5	6	GLU	238	6.01	1.71	10.08	1.44	16.09	2.34	-1.14	0.68	-0.99	0.88	-2.13	1.19	4.88	6.8	4.05	1.52	8.93	7.15	9.75	6.68	13.14	1.92	22.89	7.04	-68.32	6.16	-6.73	0.89	-75.06	6.41	0.74	0.09	0.04	0.02	0.78	0.1	-67.59	6.12	-6.69	0.88	-74.28	6.37	-57.84	1.72	6.45
	6	7	ARG	239	14.45	3.05	10.96	1.37	25.4	3.26	-3.09	1.29	-0.99	0.62	-4.07	1.42	-214.95	5.31	-3.93	1.05	-218.89	5.55	-203.6	5.42	6.04	1.74	-197.56	5.83	25.09	4.41	-5.74	0.91	19.35	4.61	0.42	0.04	0.13	0.04	0.55	0.06	25.51	4.42	-5.61	0.88	19.9	4.62	-178.09	2.83	0.42
	7	8	THR	240	6.69	1.27	10.63	1.36	17.32	1.98	-0.12	0.61	1.05	0.87	0.93	1.17	-21.61	2.47	-23.3	1.99	-44.91	3.33	-15.04	2.55	-11.62	2.1	-26.67	3.49	-2.88	1.66	0.55	1.42	-2.32	2.2	0.72	0.04	0.09	0.03	0.81	0.05	-2.16	1.65	0.65	1.4	-1.52	2.17	-17.2	1.52	-10.98
	8	9	ASP	241	4.47	1.42	10.31	1.46	14.78	1.99	-2.75	0.62	-0.85	0.96	-3.59	1.08	-14.97	6.95	-9.05	1.25	-24.02	7.28	-13.25	7.39	0.42	1.7	-12.83	7.62	-45.18	7.9	-2.81	0.94	-48	7.81	0.24	0.07	0.02	0.01	0.26	0.07	-44.94	7.85	-2.8	0.94	-47.74	7.76	-58.19	1.82	-2.38
	9	10	ILE	242	9.46	1.92	10.42	1.43	19.88	2.48	-3.92	0.95	-0.69	0.85	-4.61	1.43	-4.49	0.38	-6.12	1.26	-10.61	1.23	1.04	1.95	3.62	1.81	4.66	2.59	2.4	0.32	-4.9	1.02	-2.5	0.98	0.02	0.01	0.04	0.02	0.05	0.03	2.42	0.32	-4.86	1.01	-2.45	0.97	3.46	1.98	-1.25
	10	11	THR	243	6.37	1.66	10.42	1.29	16.78	2.32	-1.39	0.61	-0.19	0.86	-1.58	1.08	-20.02	1.59	-13.23	1.21	-33.25	1.64	-15.04	2.1	-3.01	1.81	-18.05	2.8	-3.49	1.23	-2.47	0.65	-5.95	1.21	0.42	0.05	0.04	0.01	0.46	0.05	-3.07	1.24	-2.43	0.65	-5.5	1.23	-18.11	1.72	-5.43
	11	12	MET	244	7.73	2.07	10.29	1.32	18.02	2.65	-4.7	0.77	-0.87	0.64	-5.57	1.02	0.1	0.67	2.65	1.07	2.76	1.11	3.14	2.24	12.07	1.56	15.2	2.72	-0.3	0.57	-5.74	0.78	-6.04	0.86	0.27	0.07	0.2	0.02	0.47	0.06	-0.02	0.54	-5.54	0.78	-5.56	0.84	3.11	2.15	6.53
	12	13	LYS	245	10.73	2.42	12.71	1.33	23.45	2.58	-2.15	0.94	-0.55	0.78	-2.7	1.17	-34.41	11.09	-3.94	1.02	-38.36	10.82	-25.83	11.39	8.22	1.53	-17.61	10.94	6.54	9.91	-5.11	0.74	1.43	9.66	0.61	0.1	0.27	0.03	0.88	0.1	7.15	9.84	-4.84	0.72	2.31	9.59	-18.68	3.03	3.38
	13	14	HIS	246	25.08	1.76	10.03	1.29	35.11	2.28	-3.37	0.8	-0.5	0.88	-3.88	1.35	-15.6	2.09	-4.69	0.87	-20.29	2.2	6.1	2.47	4.84	1.57	10.94	2.91	-1.21	1.53	-4.64	0.57	-5.84	1.6	0.62	0.06	0.06	0.02	0.68	0.06	-0.59	1.5	-4.58	0.56	-5.17	1.57	5.51	1.77	0.26
	14	15	LYS	247	10.96	2.35	10.18	1.19	21.15	2.63	-2.15	1.15	-1.58	0.81	-3.73	1.64	-31.69	17.73	-3.18	1.63	-34.87	18.91	-22.88	18.55	5.42	2.11	-17.46	19.95	3.08	16.23	-3.78	1.25	-0.69	17.16	0.66	0.18	0.07	0.04	0.73	0.21	3.75	16.06	-3.71	1.22	0.04	16.96	-19.13	3.4	1.72
	15	16	LEU	248	8.74	2.04	10.09	1.67	18.83	2.78	-3.23	0.89	-1.56	0.97	-4.78	1.34	-26.48	0.43	-7.96	1.71	-34.44	1.79	-20.97	2.09	0.58	2.44	-20.39	3.42	2.95	0.32	-3.99	0.91	-1.05	0.94	0.12	0.06	0	0.01	0.13	0.07	3.07	0.3	-3.99	0.91	-0.92	0.89	-17.9	2.13	-3.41
	16	17	GLY	249	0	0	9.05	1.53	9.05	1.53	0	0	-1.4	0.75	-1.4	0.75	0	0	-7.76	2.25	-7.76	2.25	0	0	-0.11	2.25	-0.11	2.25	0	0	-5.83	1.6	-5.83	1.6	0	0	0.31	0.1	0.31	0.1	0	0	-5.52	1.54	-5.52	1.54	0	0	-5.63
	17	18	GLY	250	0	0	8.33	1.62	8.33	1.62	0	0	-0.43	0.65	-0.43	0.65	0	0	-5.3	2.02	-5.3	2.02	0	0	2.59	2.51	2.59	2.51	0	0	-7.36	1.75	-7.36	1.75	0	0	0.59	0.05	0.59	0.05	0	0	-6.77	1.73	-6.77	1.73	0	0	-4.18
	18	19	GLY	251	0	0	9.25	1.34	9.25	1.34	0	0	-1.43	0.77	-1.43	0.77	0	0	-7.12	2.1	-7.12	2.1	0	0	0.7	2.38	0.7	2.38	0	0	-4.5	1.59	-4.5	1.59	0	0	0.23	0.06	0.23	0.06	0	0	-4.28	1.55	-4.28	1.55	0	0	-3.58
	19	20	GLN	252	13.86	1.92	10.37	1.65	24.24	2.61	-1.94	0.89	-0.71	0.61	-2.64	1.12	-65.98	3.02	-3.56	1.32	-69.54	3.21	-54.06	3.08	6.1	1.9	-47.95	3.43	-8.13	2.28	-6.47	0.99	-14.6	2.3	0.56	0.12	0.12	0.06	0.69	0.1	-7.57	2.22	-6.34	0.98	-13.91	2.27	-61.62	1.94	-0.24
	20	21	TYR	253	8.65	1.89	8.94	1.36	17.59	2.43	-3.63	0.8	-0.79	0.89	-4.42	1.29	-18.79	1.04	-2.45	0.97	-21.24	1.53	-13.77	2.2	5.7	1.46	-8.07	2.71	-2.66	0.49	-5.1	0.69	-7.77	0.87	0.07	0.03	0.01	0.01	0.08	0.03	-2.6	0.49	-5.09	0.69	-7.69	0.87	-16.37	2.16	0.61
	21	22	GLY	254	0	0	8.76	1.51	8.76	1.51	0	0	-2	0.76	-2	0.76	0	0	-11.1	1.42	-11.1	1.42	0	0	-4.34	1.89	-4.34	1.89	0	0	-1.69	0.95	-1.69	0.95	0	0	0.09	0.04	0.09	0.04	0	0	-1.6	0.94	-1.6	0.94	0	0	-5.94
	22	23	GLU	255	6.48	1.72	10.9	1.41	17.38	2.26	-0.94	1.14	-0.99	0.77	-1.93	1.52	-20.42	10.03	-4.97	1.62	-25.39	10.14	-14.87	9.69	4.93	1.91	-9.95	10.21	-42.85	8.96	-6.09	1.03	-48.95	9.07	0.4	0.11	0.04	0.02	0.44	0.12	-42.45	8.91	-6.06	1.03	-48.51	9.02	-57.33	1.8	-1.13
	23	24	VAL	256	6.13	1.7	9.96	1.21	16.08	2.29	-2.97	0.77	-0.88	1.04	-3.86	1.45	-19.41	0.53	-10.06	1.19	-29.47	1.11	-16.26	1.81	-0.98	1.52	-17.24	2.23	4.23	0.49	-4.37	0.77	-0.14	0.48	0.04	0.01	0	0	0.04	0.01	4.26	0.49	-4.37	0.77	-0.1	0.48	-11.99	1.71	-5.35
	24	25	TYR	257	8.37	1.68	10.35	1.23	18.73	2.19	-3.77	0.73	-2.42	0.86	-6.19	1.13	-17.92	1.31	-11.38	0.95	-29.3	1.64	-13.31	2.3	-3.45	1.32	-16.76	2.8	-3.95	0.86	-2.51	0.34	-6.46	0.92	0.36	0.08	0	0	0.36	0.08	-3.58	0.83	-2.51	0.34	-6.1	0.89	-16.89	1.99	-5.97
	25	26	GLU	258	6.32	1.72	9.29	1.09	15.6	2.03	-3.47	1.07	-2.11	0.92	-5.57	1.44	-4.11	8.89	-8.9	1.03	-13.01	8.96	-1.26	8.92	-1.72	1.62	-2.97	8.9	-56.59	8.39	-2.32	0.55	-58.91	8.42	0.15	0.04	0	0	0.15	0.04	-56.44	8.36	-2.32	0.55	-58.76	8.39	-57.7	1.89	-4.04
	26	27	GLY	259	0	0	8.12	1.27	8.12	1.27	0	0	-3.06	0.91	-3.06	0.91	0	0	-7.78	1.23	-7.78	1.23	0	0	-2.71	1.7	-2.71	1.7	0	0	-2.78	0.93	-2.78	0.93	0	0	0	0	0	0	0	0	-2.78	0.93	-2.78	0.93	0	0	-5.49
	27	28	VAL	260	6.11	1.7	9.69	1.09	15.8	2.12	-1.71	0.72	-1.47	0.82	-3.18	1.16	-17.35	0.59	-12.15	0.98	-29.49	0.97	-12.95	2.04	-3.93	1.41	-16.88	2.35	2.1	0.47	-2.31	0.68	-0.21	0.57	0.25	0.04	0	0	0.25	0.04	2.35	0.47	-2.31	0.68	0.04	0.56	-10.61	1.94	-6.24
	28	29	TRP	261	11.31	1.96	11.44	1.28	22.75	2.29	-6.33	0.81	-2.85	0.93	-9.18	1.38	4.17	2.37	-5.46	1.27	-1.29	2.89	9.15	3.03	3.13	1.82	12.28	3.77	-0.1	1.41	-0.88	0.45	-0.98	1.59	0.3	0.07	0	0	0.3	0.07	0.2	1.41	-0.88	0.45	-0.69	1.58	9.34	2.23	2.25
	29	30	LYS	262	10.89	2.47	12.21	1.46	23.1	2.99	-2.26	0.88	-1.07	0.84	-3.33	1.35	-16.28	5.08	0.2	1.46	-16.08	5.25	-7.65	5.61	11.34	1.8	3.69	5.85	-10.03	5.05	-4.14	0.84	-14.18	5.15	0.73	0.06	0.13	0.03	0.86	0.07	-9.3	5.02	-4.02	0.83	-13.32	5.12	-16.95	2.65	7.32
	30	31	LYS	263	10.7	2.15	11.5	1.72	22.19	2.81	-2	0.8	-0.48	0.71	-2.48	1.18	-7.72	5.13	-9.17	1.56	-16.89	5.77	0.97	5.71	1.85	2.28	2.83	6.28	-19.49	4.93	-4.47	0.9	-23.96	5.29	0.82	0.06	0.26	0.02	1.08	0.07	-18.67	4.91	-4.21	0.89	-22.89	5.26	-17.7	2.5	-2.36
	31	32	TYR	264	8.44	2.3	9.71	1.52	18.15	2.85	-0.26	0.63	0.19	0.79	-0.07	1	-17.85	0.79	-8.68	0.88	-26.53	1.21	-9.67	2.58	1.22	1.49	-8.46	3.2	-4.69	0.64	-5.9	0.69	-10.59	0.94	0.83	0.06	0.19	0.03	1.02	0.07	-3.86	0.62	-5.71	0.68	-9.57	0.91	-13.53	2.38	-4.49
	32	33	SER	265	3.52	1.18	10.54	1.51	14.06	1.98	-0.09	0.4	-0.18	0.64	-0.27	0.81	-2.53	1.12	-3.95	1.45	-6.48	2.16	0.91	1.54	6.4	2.07	7.31	2.89	-3.07	0.93	-7.21	0.92	-10.29	1.39	0.55	0.03	0.16	0.03	0.71	0.05	-2.53	0.93	-7.05	0.9	-9.57	1.38	-1.62	1.24	-0.65
	33	34	LEU	266	8.79	1.82	10.76	1.53	19.55	2.45	-1.06	0.71	-0.72	0.85	-1.78	1.21	-25.92	0.35	-6.78	0.93	-32.7	1.02	-18.18	2.06	3.26	1.7	-14.93	2.78	1.93	0.28	-2.6	0.46	-0.66	0.46	0.57	0.06	0.03	0.01	0.6	0.06	2.5	0.28	-2.57	0.46	-0.07	0.46	-15.68	1.99	0.69
	34	35	THR	267	6.48	1.73	10.27	1.06	16.75	2.14	-2.2	0.57	-1.68	0.58	-3.87	0.87	-23.54	1.65	-8.21	0.7	-31.75	1.74	-19.26	2.15	0.38	1.2	-18.87	2.67	-0.3	0.9	-5.24	0.47	-5.55	0.86	0.31	0.05	0.04	0.02	0.34	0.05	0	0.88	-5.21	0.46	-5.2	0.85	-19.25	1.78	-4.82
	35	36	VAL	268	5.87	1.43	9.64	1.07	15.51	1.75	-3.83	0.81	-1.48	0.88	-5.32	1.28	-19.29	0.5	-9.81	1.07	-29.09	1.1	-17.25	1.61	-1.65	1.37	-18.9	2.08	3.97	0.37	-4.52	0.66	-0.55	0.48	0	0	0	0	0	0	3.97	0.37	-4.52	0.66	-0.55	0.48	-13.28	1.55	-6.17
	36	37	ALA	269	2.47	0.77	9.96	1.25	12.44	1.63	-1.86	0.37	-2.6	0.89	-4.47	0.97	2.18	0.11	-7.34	0.83	-5.16	0.82	2.79	0.84	0.02	1.22	2.81	1.72	-0.13	0.05	-0.66	0.31	-0.78	0.31	0.02	0.01	0	0	0.02	0.01	-0.11	0.05	-0.66	0.31	-0.76	0.31	2.68	0.84	-0.63
	37	38	VAL	270	6	1.58	10.49	1.14	16.49	1.98	-3.58	0.7	-1.4	0.98	-4.98	1.27	-19.01	0.51	-4.49	0.9	-23.5	0.88	-16.59	1.79	4.6	1.32	-11.98	2.02	3.56	0.42	-4.13	0.56	-0.57	0.37	0	0	0	0	0	0	3.56	0.42	-4.13	0.56	-0.57	0.37	-13.03	1.72	0.48
	38	39	LYS	271	11.77	2.57	10.64	1.38	22.41	2.91	-3.79	1.07	-2.3	0.85	-6.09	1.37	-63.54	12.59	-9.2	0.87	-72.74	12.53	-55.56	12.65	-0.85	1.56	-56.41	12.77	38.77	10.75	-1.23	0.41	37.54	10.77	0.12	0.05	0	0	0.12	0.05	38.89	10.73	-1.23	0.41	37.67	10.74	-16.66	3.34	-2.08
	39	40	THR	272	6.26	1.56	9.94	1.22	16.19	2.09	-2.33	0.76	-0.99	0.8	-3.31	1.1	-25.32	1.45	-7.67	0.92	-32.99	1.99	-21.39	2.14	1.28	1.55	-20.1	2.91	0.91	1.24	-7.62	0.83	-6.71	1.77	0.04	0.03	0.09	0.03	0.13	0.04	0.94	1.23	-7.52	0.82	-6.58	1.74	-20.44	1.69	-6.24
	40	41	LEU	273	8.85	2.24	11.16	1.3	20.01	2.7	-2.44	0.92	-0.51	0.86	-2.95	1.36	-28.23	0.56	11.59	1.84	-16.64	1.87	-21.82	2.54	22.24	2.09	0.42	3.24	4.2	0.42	-11.63	1.27	-7.43	1.16	0.17	0.06	0.12	0.02	0.3	0.06	4.37	0.43	-11.51	1.27	-7.13	1.16	-17.45	2.45	10.73
	41	42	LYS	274	11.05	2.78	10.85	1.8	21.9	3.36	-0.23	1.09	0.17	0.69	-0.06	1.35	-35.23	8.57	-3.82	1.88	-39.05	8.96	-24.41	9	7.2	2.3	-17.2	9.45	6.87	7.85	-9.67	1.45	-2.8	8.1	0.79	0.21	0.27	0.06	1.07	0.2	7.66	7.8	-9.39	1.43	-1.73	8.07	-16.75	3.22	-2.19
	42	43	GLU	275	6.31	1.79	9.42	1.27	15.74	2.36	-2.72	0.82	-0.45	0.69	-3.17	1.16	46.13	9.27	-10.79	1.08	35.35	9.48	49.73	9.25	-1.81	1.52	47.92	9.44	-107.16	8.78	-4.96	0.85	-112.12	9.05	0.43	0.06	0.05	0.02	0.48	0.07	-106.74	8.77	-4.9	0.84	-111.64	9.04	-57.01	1.97	-6.71
	43	44	ASP	276	4.29	1.68	10.23	1.5	14.52	2.35	-1.23	0.89	-0.44	0.81	-1.68	1.35	34.83	6.06	-1.2	1.56	33.63	6.66	37.89	6.03	8.59	1.86	46.47	6.51	-98.67	5.41	-11.4	1.31	-110.07	5.98	0.5	0.05	0.09	0.03	0.58	0.06	-98.17	5.41	-11.32	1.3	-109.48	5.98	-60.28	1.56	-2.73
	44	45	THR	277	6.34	1.44	10.05	1.25	16.39	2.1	-0.07	0.85	0.07	0.88	-0.01	1.36	-28.22	4.47	-3.79	1.91	-32.01	5.55	-21.96	4.23	6.32	2.12	-15.63	5.18	2.16	2.83	-10.25	1.46	-8.1	3.68	0.58	0.07	0.04	0.01	0.62	0.07	2.74	2.83	-10.21	1.46	-7.48	3.69	-19.22	2.05	-3.89
	45	46	MET	278	7.1	1.85	14.11	1.66	21.2	2.71	-0.89	0.48	-1.01	0.77	-1.89	1.1	-3.05	1.31	-3.75	1.36	-6.8	1.78	3.16	2.29	9.35	2.08	12.51	3.3	1.85	1.2	-8.41	1.3	-6.56	1.51	1.04	0.07	0.18	0.08	1.21	0.11	2.88	1.2	-8.23	1.26	-5.34	1.49	6.05	1.92	1.12
	46	47	GLU	279	6.39	1.93	10.81	1.48	17.19	2.54	-0.87	0.95	0.12	0.83	-0.75	1.48	48.44	9.29	1.09	3.02	49.53	10.38	53.95	9.5	12.01	3.41	65.96	10.46	-110.67	9.84	-11.82	1.99	-122.5	10.59	0.76	0.14	0.1	0.06	0.86	0.18	-109.92	9.77	-11.72	1.94	-121.64	10.5	-55.96	1.93	0.29
	47	48	VAL	280	6.7	1.82	10.98	1.39	17.68	2.27	-2.61	0.75	-0.15	0.85	-2.77	1.22	-22.39	0.63	-9.57	1.53	-31.96	1.49	-18.31	1.99	1.26	2.09	-17.04	2.84	7.23	0.55	-7.27	1.14	-0.04	1.01	0.11	0.05	0	0	0.12	0.05	7.35	0.54	-7.27	1.14	0.07	1	-10.96	1.91	-6.01
	48	49	GLU	281	6.42	1.9	10.75	1.28	17.17	2.4	-0.85	0.6	-0.62	0.69	-1.47	0.97	34.15	4.02	-7.23	1.34	26.92	4.33	39.72	4.19	2.9	1.93	42.62	4.6	-97.07	3.99	-7.38	1.19	-104.45	4.07	0.89	0.07	0.05	0.03	0.94	0.07	-96.18	3.99	-7.33	1.18	-103.52	4.06	-56.46	1.6	-4.43
	49	50	GLU	282	6.33	1.8	10.92	1.54	17.25	2.26	0.21	1.1	-0.87	0.78	-0.67	1.53	12.65	9.68	-1.85	1.74	10.8	9.94	19.18	9.36	8.2	2.07	27.38	9.48	-77.58	9.09	-8.98	1.4	-86.55	9.34	0.69	0.08	0.05	0.02	0.74	0.09	-76.89	9.11	-8.92	1.39	-85.81	9.35	-57.71	1.92	-0.73
	50	51	PHE	283	8.16	2.04	11	1.14	19.16	2.44	-3.64	0.74	-2.21	0.65	-5.84	0.99	0.95	0.29	-6.79	1.22	-5.84	1.37	5.47	2.3	2.01	1.49	7.48	3.01	-0.42	0.29	-1.28	0.73	-1.69	0.89	0.17	0.04	0.03	0.02	0.2	0.04	-0.25	0.29	-1.24	0.73	-1.49	0.87	5.22	2.29	0.76
	51	52	LEU	284	8.97	1.94	11.38	1.62	20.35	2.57	-2.24	0.88	-1.48	0.72	-3.72	1.12	-27.46	0.65	0.44	0.93	-27.02	1.08	-20.73	2.14	10.35	1.59	-10.38	2.67	3.86	0.54	-3.61	0.82	0.25	0.8	0.34	0.08	0.06	0.02	0.4	0.08	4.2	0.51	-3.56	0.81	0.64	0.8	-16.53	2.06	6.79
	52	53	LYS	285	11.42	2.17	11.33	1.44	22.75	2.69	-1.09	0.71	-0.99	0.74	-2.08	1.06	-27.78	5.91	-13.76	1.82	-41.54	5.95	-17.45	6.36	-3.42	1.81	-20.87	6.46	0.44	6	0.13	1.19	0.57	5.99	1.12	0.08	0.04	0.03	1.15	0.1	1.56	5.97	0.16	1.17	1.72	5.93	-15.89	2.16	-3.26
	53	54	GLU	286	6.37	1.75	11.13	1.25	17.49	2.12	-2.78	0.67	-1.24	1.09	-4.02	1.14	28.56	9.16	-13.98	1.47	14.59	9.53	32.15	9.37	-4.09	1.77	28.06	9.92	-88.09	9.07	-4.28	0.81	-92.37	9.51	0.36	0.1	0.02	0.01	0.38	0.1	-87.73	8.99	-4.26	0.81	-91.99	9.43	-55.57	1.82	-8.35
	54	55	ALA	287	2.73	0.8	10.98	1.22	13.71	1.5	-1.69	0.36	-2.2	0.77	-3.9	0.9	2.13	0.14	-10.52	1.17	-8.39	1.19	3.17	0.92	-1.74	1.65	1.43	1.94	-0.19	0.08	1.31	0.67	1.12	0.7	0.01	0.01	0	0.01	0.01	0.01	-0.18	0.08	1.31	0.67	1.14	0.7	2.99	0.93	-0.43
	55	56	ALA	288	2.82	0.9	11.1	1.48	13.93	1.86	-0.94	0.23	-1.78	0.7	-2.72	0.74	2.24	0.15	-4.31	1.26	-2.07	1.25	4.12	0.96	5.01	1.75	9.13	2.04	-0.23	0.11	-2.3	1.26	-2.53	1.23	0.32	0.05	0.06	0.03	0.38	0.06	0.09	0.15	-2.24	1.25	-2.15	1.22	4.21	0.97	2.77
	56	57	VAL	289	6.31	1.82	11.11	1.14	17.42	2.27	-0.84	0.79	-0.19	0.99	-1.03	1.37	-19.76	0.86	-9.54	1.5	-29.3	1.3	-14.28	2.2	1.38	1.74	-12.91	2.63	4.65	0.67	-4.66	0.97	-0.01	0.82	0.4	0.07	0.02	0.02	0.41	0.08	5.05	0.7	-4.64	0.96	0.41	0.79	-9.23	2.01	-3.27
	57	58	MET	290	7.13	1.81	10.71	1.18	17.84	2.43	-4.67	0.64	-1.8	0.86	-6.46	1.17	-2.21	0.91	-0.35	1.04	-2.56	1.1	0.26	2.05	8.56	1.66	8.82	2.69	1.67	0.86	-5.01	0.74	-3.34	0.85	0.14	0.05	0.01	0.01	0.15	0.05	1.81	0.87	-5	0.74	-3.19	0.85	2.07	1.94	3.56
	58	59	LYS	291	11.01	2.06	10.41	1.34	21.42	2.4	-4.11	0.85	-1.08	0.63	-5.19	1.13	-25.1	7.82	-12.04	1.92	-37.14	7.44	-18.2	8.44	-2.71	2.39	-20.91	8	0.48	7.5	-0.87	1.38	-0.39	7.11	0.39	0.08	0.07	0.03	0.46	0.09	0.87	7.46	-0.8	1.38	0.07	7.06	-17.33	2.47	-3.51
	59	60	GLU	292	6.24	1.82	10.9	1.43	17.14	2.21	-0.85	0.83	-0.2	0.83	-1.05	1.23	2.23	9.52	-11.92	2.05	-9.69	10.39	7.62	9.1	-1.22	2.51	6.4	10.12	-65.99	9.07	-3.99	1.86	-69.99	10.01	0.74	0.11	0.14	0.05	0.88	0.13	-65.25	9	-3.85	1.82	-69.1	9.91	-57.63	1.74	-5.07
	60	61	ILE	293	10.04	2.09	10.85	1.51	20.89	2.79	-2.6	1.08	-0.25	0.86	-2.84	1.61	-5.64	0.38	4.44	1.02	-1.2	1.01	1.81	2.28	15.04	1.51	16.85	2.87	3.34	0.35	-8.25	0.84	-4.91	0.82	0.07	0.06	0.03	0.02	0.1	0.06	3.41	0.35	-8.22	0.84	-4.81	0.81	5.22	2.29	6.82
	61	62	LYS	294	11.26	2.43	10.24	1.28	21.49	2.88	-0.65	0.75	-1.07	0.73	-1.73	1.19	-4.51	8.51	-2.36	1.19	-6.87	8.35	6.1	8.96	6.8	1.7	12.9	8.86	-22.03	8.65	-3.3	1.02	-25.32	8.43	1	0.17	0.08	0.03	1.09	0.16	-21.02	8.62	-3.21	1.01	-24.24	8.41	-14.93	2.47	3.59
	62	63	HIS	295	24.83	1.64	11.09	1.28	35.92	2.02	-6.44	0.74	-0.43	0.69	-6.87	1.08	-14.29	1.52	-0.32	0.94	-14.61	1.83	4.1	2.29	10.33	1.62	14.43	2.85	-0.71	1.26	-4.48	0.68	-5.18	1.49	0.21	0.04	0.07	0.02	0.27	0.05	-0.5	1.23	-4.41	0.68	-4.91	1.46	3.6	1.84	5.92
	63	64	PRO	296	11.95	1.43	14.03	1.19	25.98	2.04	-1.01	0.53	-1.32	0.56	-2.33	0.73	-7.42	0.98	-1.29	1.13	-8.71	0.93	3.51	1.82	11.42	1.41	14.93	2.15	6.75	0.95	-9.5	1.04	-2.75	0.83	0.69	0.03	0.11	0.03	0.8	0.03	7.44	0.95	-9.39	1.04	-1.95	0.82	10.95	1.5	2.03
	64	65	ASN	297	11.48	1.57	10.65	1.43	22.13	2.25	-4.07	0.6	-1.46	0.87	-5.53	1	-81.85	1.22	-7.51	1.08	-89.36	1.56	-74.44	1.68	1.67	1.51	-72.76	2.19	-3.9	0.78	-1.07	0.31	-4.96	0.81	0.14	0.02	0	0	0.14	0.02	-3.76	0.78	-1.07	0.31	-4.83	0.8	-78.2	1.49	0.61
	65	66	LEU	298	8.97	1.83	10.53	1.43	19.5	2.27	-3.12	0.88	-1.76	0.93	-4.88	1.29	-27.36	0.47	-1.61	1.28	-28.97	1.24	-21.51	1.99	7.15	1.96	-14.35	2.71	3.46	0.33	-4.68	0.75	-1.21	0.66	0.08	0.03	0	0	0.09	0.03	3.55	0.33	-4.67	0.75	-1.13	0.66	-17.96	1.91	2.48
	66	67	VAL	299	6.66	1.65	10.69	1.36	17.35	2.32	-3.47	0.6	-1.25	0.8	-4.72	1.17	-20.98	0.53	-7.94	1.15	-28.92	1.2	-17.79	1.87	1.49	1.59	-16.29	2.34	5.6	0.4	-8.07	0.82	-2.46	0.64	0.05	0.02	0.04	0.02	0.08	0.03	5.65	0.41	-8.03	0.82	-2.38	0.64	-12.14	1.77	-6.53
	67	68	GLN	300	13.56	1.99	10.63	1.17	24.19	2.42	-2.1	0.61	-1.72	0.78	-3.83	1.11	-67.38	5.63	-5.16	1.15	-72.55	5.99	-55.92	5.54	3.74	1.42	-52.18	5.89	-6.87	4.43	-4.21	0.61	-11.08	4.63	0.62	0.09	0.02	0.02	0.64	0.1	-6.26	4.42	-4.19	0.61	-10.45	4.62	-62.18	1.94	-0.45
	68	69	LEU	301	8.82	1.55	10.64	1.16	19.46	2.07	-3.59	1.08	-1.61	0.61	-5.19	1.26	-26.55	0.52	0.46	1.26	-26.09	1.1	-21.32	1.8	9.49	1.9	-11.83	2.56	2.57	0.41	-5.06	1.22	-2.49	1.01	0.04	0.03	0.07	0.03	0.11	0.05	2.6	0.4	-4.99	1.2	-2.39	1	-18.71	1.79	4.5
	69	70	LEU	302	9.02	1.91	10.27	1.33	19.29	2.47	-2.9	0.96	-1.3	0.68	-4.2	1.27	-25.99	0.48	-3.43	0.95	-29.42	0.88	-19.87	2.14	5.54	1.68	-14.32	2.68	2.48	0.34	-5.55	0.7	-3.07	0.55	0.16	0.05	0.1	0.03	0.27	0.06	2.64	0.36	-5.45	0.69	-2.8	0.54	-17.23	2.12	0.1
	70	71	GLY	303	0	0	7.75	1.24	7.75	1.24	0	0	-3.26	0.83	-3.26	0.83	0	0	-11.12	0.8	-11.12	0.8	0	0	-6.63	1.23	-6.63	1.23	0	0	-0.69	0.38	-0.69	0.38	0	0	0	0	0	0	0	0	-0.69	0.38	-0.69	0.38	0	0	-7.32
	71	72	VAL	304	6.2	1.81	9.54	1.24	15.74	2.31	-3.06	0.81	-1.65	0.93	-4.72	1.22	-19.29	0.69	-10.42	1.21	-29.71	1.08	-16.16	1.98	-2.53	1.68	-18.69	2.49	3.88	0.54	-4.9	0.79	-1.01	0.56	0	0	0	0	0	0	3.88	0.54	-4.9	0.79	-1.01	0.56	-12.27	1.89	-7.43
	72	73	CYS	305	3.11	0.97	10.77	1.12	13.88	1.68	-3.83	0.46	-2.54	0.77	-6.37	0.92	4.58	0.61	-11.21	1.12	-6.62	1.37	3.86	1.14	-2.98	1.56	0.88	2.17	-0.19	0.35	1.35	0.61	1.16	0.74	0	0	0	0	0.01	0.01	-0.19	0.35	1.35	0.61	1.16	0.74	3.68	1.09	-1.63
	73	74	THR	306	6.29	1.36	11.21	1.38	17.5	2.17	-1.39	0.96	-0.66	0.86	-2.05	1.38	-28.97	1.69	-3.38	1.14	-32.35	1.95	-24.07	1.93	7.17	1.55	-16.9	2.47	2.62	0.92	-6.05	0.71	-3.44	1.23	0.14	0.04	0.09	0.03	0.23	0.05	2.76	0.9	-5.96	0.71	-3.21	1.21	-21.31	1.75	1.21
	74	75	ARG	307	13.31	2.76	11.33	1.59	24.64	3.17	-1.01	1.22	-0.44	0.78	-1.46	1.33	-211.93	9.44	-6.96	1.58	-218.89	8.99	-199.64	9.65	3.93	1.96	-195.71	9.33	20.99	7.88	-6.19	0.87	14.8	7.57	1.06	0.16	0.25	0.02	1.31	0.15	22.05	7.78	-5.94	0.87	16.11	7.47	-177.59	3.29	-2.01
	75	76	GLU	308	6.78	1.92	11.12	1.29	17.91	2.44	-1.09	1.12	0.45	1.07	-0.64	1.71	-16.57	6.6	-3.57	1.6	-20.15	7.37	-10.87	6.67	8	1.84	-2.88	7.33	-46.88	5.58	-6.16	0.83	-53.04	6.14	0.47	0.03	0.02	0.01	0.49	0.03	-46.4	5.57	-6.14	0.83	-52.55	6.14	-57.28	2.21	1.86
	76	77	PRO	309	12.32	1.55	14.07	1.31	26.39	2.08	-1.94	0.57	-0.83	0.65	-2.77	0.84	-10.56	0.95	12.95	1.14	2.39	0.83	-0.18	1.84	26.2	1.71	26.02	2.17	10.06	0.92	-13.34	1.04	-3.28	0.69	0.35	0.05	0.1	0.02	0.45	0.05	10.41	0.91	-13.24	1.03	-2.83	0.69	10.24	1.67	12.95
	77	78	PRO	310	12.27	1.46	13.05	1.33	25.31	2.11	-1.83	0.52	-1.79	0.75	-3.62	0.89	-6.25	0.94	-2.22	1.37	-8.47	1.21	4.2	1.82	9.03	1.6	13.23	2.28	5.46	0.9	-7.33	0.89	-1.87	0.74	0.47	0.05	0.01	0.01	0.48	0.05	5.93	0.92	-7.32	0.89	-1.39	0.75	10.13	1.61	1.71
	78	79	PHE	311	8.46	1.98	9.98	1.34	18.44	2.48	-4.06	0.75	-2.75	0.67	-6.81	1.11	-0.51	0.44	-7.15	1.09	-7.66	1.05	3.89	2.2	0.08	1.54	3.97	2.65	0.62	0.37	-1.63	0.63	-1.01	0.65	0.11	0.03	0.01	0.01	0.12	0.03	0.73	0.37	-1.63	0.63	-0.9	0.64	4.62	2.15	-1.55
	79	80	TYR	312	8.87	2.09	9.97	1.19	18.84	2.56	-3.81	0.66	-2.91	0.74	-6.72	1.01	-16.27	0.74	-5.98	0.79	-22.25	1.08	-11.21	2.25	1.08	1.42	-10.14	2.76	-4.18	0.61	-2.06	0.41	-6.24	0.74	0.24	0.04	0	0	0.24	0.04	-3.95	0.59	-2.06	0.41	-6.01	0.73	-15.16	2.21	-0.98
	80	81	ILE	313	9.73	2.41	10.58	1.29	20.31	2.78	-3.15	0.95	-2.13	0.85	-5.28	1.35	-5.06	0.59	-6.23	0.8	-11.28	0.77	1.52	2.83	2.23	1.57	3.74	2.82	3.28	0.56	-3.66	0.48	-0.39	0.36	0.02	0.02	0	0	0.02	0.02	3.3	0.55	-3.66	0.48	-0.36	0.36	4.82	2.59	-1.44
	81	82	ILE	314	10.5	1.92	10.79	1.22	21.29	2.32	-4.77	1	-1.78	0.88	-6.55	1.45	-5.02	0.4	-9.33	0.98	-14.35	0.9	0.71	2.12	-0.33	1.31	0.39	2.41	3.05	0.36	-3.21	0.55	-0.16	0.31	0	0	0	0	0	0	3.05	0.36	-3.21	0.55	-0.16	0.31	3.77	2.06	-3.54
	82	83	ILE	315	8.85	1.93	10.05	1.19	18.91	2.48	-3.19	1.15	-1.61	0.96	-4.79	1.57	-6	0.41	-11.87	0.93	-17.88	0.94	-0.34	2.09	-3.42	1.33	-3.76	2.47	3.84	0.37	-3.44	0.47	0.41	0.44	0.04	0.03	0	0	0.04	0.03	3.89	0.37	-3.44	0.47	0.45	0.45	3.55	2.11	-6.86
	83	84	GLU	316	6.45	1.77	9.85	1.06	16.3	2.11	-2.71	1.08	-1.99	0.65	-4.7	1.32	-9.86	5.84	-0.33	0.87	-10.2	5.85	-6.12	5.18	7.53	1.35	1.4	5.47	-53.34	4.45	-9.02	0.73	-62.35	4.62	0.18	0.03	0.01	0.01	0.19	0.03	-53.16	4.44	-9	0.73	-62.16	4.62	-59.28	2.3	-1.48
	84	85	PHE	317	7.89	2.06	9.8	1.37	17.68	2.49	-2.44	0.59	-2.16	0.61	-4.61	0.84	0.72	0.45	-2.02	1.01	-1.3	1.1	6.17	2.21	5.61	1.46	11.78	2.82	-1.01	0.39	-5.55	0.7	-6.56	0.82	0.35	0.05	0.1	0.02	0.46	0.05	-0.66	0.38	-5.45	0.7	-6.1	0.81	5.51	2.24	0.16
	85	86	MET	318	6.72	1.84	11.08	1.21	17.81	2.19	-6.24	0.82	-2.04	0.68	-8.28	1.13	-2.29	0.58	-2.68	0.93	-4.98	1.09	-1.81	2.13	6.36	1.36	4.55	2.58	2.33	0.43	-6.12	0.59	-3.79	0.72	0.04	0.01	0.05	0.02	0.1	0.02	2.38	0.43	-6.07	0.59	-3.69	0.72	0.56	2.14	0.29
	86	87	THR	319	6.44	1.38	12.33	1.51	18.77	2.09	-1.25	0.48	-0.58	0.62	-1.83	0.88	-24.57	1.75	-6.92	0.93	-31.49	2.3	-19.38	2.24	4.82	1.64	-14.56	3.2	0.61	1.19	-9.27	0.69	-8.66	1.56	0.45	0.04	0.18	0.02	0.64	0.05	1.06	1.18	-9.09	0.68	-8.03	1.55	-18.32	1.54	-4.27
	87	88	TYR	320	8.42	1.57	9.03	1.64	17.44	2.32	-0.23	0.91	-0.55	0.75	-0.78	1.26	-24.12	1.62	-1.17	1.09	-25.29	1.99	-15.93	2.22	7.31	1.82	-8.62	3.03	-0.68	0.71	-8.42	0.77	-9.1	1.01	0.6	0.06	0.15	0.03	0.75	0.06	-0.08	0.7	-8.27	0.76	-8.35	1	-16.01	1.96	-0.96
	88	89	GLY	321	0	0	8.24	1.43	8.24	1.43	0	0	-2.01	0.67	-2.01	0.67	0	0	-8.44	1.2	-8.44	1.2	0	0	-2.22	1.59	-2.22	1.59	0	0	-3.21	0.94	-3.21	0.94	0	0	0.16	0.03	0.16	0.03	0	0	-3.05	0.94	-3.05	0.94	0	0	-5.27
	89	90	ASN	322	11.59	1.77	10.24	1.34	21.84	2.27	-4.24	0.79	-3.19	0.61	-7.43	1.04	-79.87	2.05	-1.56	1.32	-81.43	2.55	-72.52	2.71	5.49	1.69	-67.03	3.42	-5.65	1.38	-4.97	0.91	-10.62	1.85	0.05	0.04	0.01	0.01	0.06	0.04	-5.6	1.37	-4.97	0.9	-10.57	1.84	-78.12	2	0.52
	90	91	LEU	323	8.96	1.98	11.1	1.35	20.06	2.27	-4.67	0.85	-2.09	1.03	-6.76	1.32	-28.83	0.38	-0.18	0.78	-29.01	0.83	-24.55	1.92	8.83	1.47	-15.72	2.22	4.98	0.22	-7.99	0.5	-3	0.45	0	0	0	0	0	0	4.98	0.22	-7.99	0.5	-3	0.45	-19.57	1.93	0.84
	91	92	LEU	324	8.3	1.9	11.62	1.23	19.92	2.43	-2.64	0.92	-2.5	0.81	-5.14	1.28	-28.67	0.45	-4.34	0.97	-33.02	1.14	-23.01	2.14	4.78	1.53	-18.23	2.79	4.73	0.3	-7.57	0.66	-2.84	0.71	0.19	0.04	0	0	0.19	0.04	4.92	0.31	-7.57	0.66	-2.65	0.72	-18.09	2.16	-2.79
	92	93	ASP	325	4.41	1.37	10.58	1.3	14.99	1.89	-2.18	0.38	-2.28	0.68	-4.46	0.82	54.67	5.42	4.19	1.67	58.86	5.93	56.9	5.45	12.49	2.01	69.39	6.2	-118.54	5.22	-19.03	1.46	-137.56	5.62	0.5	0.08	0.01	0.01	0.51	0.08	-118.04	5.22	-19.01	1.46	-137.05	5.62	-61.14	1.23	-6.52
	93	94	TYR	326	8.59	1.79	11.01	1.46	19.6	2.37	-2.98	0.8	-2.36	0.7	-5.34	1.05	-20.66	1.35	-3.92	1.33	-24.58	2.06	-15.04	2.28	4.73	1.53	-10.32	2.97	-1.77	0.81	-5.46	0.71	-7.23	1.18	0.21	0.06	0.03	0.02	0.23	0.07	-1.56	0.77	-5.44	0.7	-7	1.14	-16.61	2.01	-0.71
	94	95	LEU	327	9.16	1.86	11.48	1.41	20.65	2.45	-4.69	0.95	-2.21	0.73	-6.9	1.29	-29.06	0.47	6.72	1.26	-22.34	1.16	-24.59	1.89	16	1.76	-8.59	2.59	5.63	0.3	-8.69	1.04	-3.06	0.88	0	0	0.01	0.01	0.01	0.01	5.63	0.29	-8.68	1.04	-3.05	0.88	-18.96	1.88	7.32
	95	96	ARG	328	12.06	2.32	10.54	1.43	22.6	2.65	-3.79	0.9	-0.7	0.59	-4.49	1.17	-238.67	4.24	-9.51	1.07	-248.19	3.96	-230.4	4.1	0.33	1.33	-230.07	4.28	52.82	4.15	-5.26	0.57	47.57	3.99	0.78	0.06	0.25	0.03	1.03	0.07	53.61	4.13	-5	0.57	48.6	3.96	-176.8	2.38	-4.68
	96	97	GLU	329	6.28	1.7	10.91	1.54	17.18	2.35	-0.75	0.64	0.36	0.81	-0.39	1.18	69.75	4.17	-3.86	1.19	65.89	4.53	75.27	4.79	7.41	1.81	82.68	5.2	-132.51	4.13	-14.27	0.8	-146.77	4.48	0.86	0.06	0.21	0.03	1.07	0.05	-131.65	4.15	-14.05	0.8	-145.7	4.51	-56.38	1.65	-6.65
	97	98	CYS	330	3.59	1.11	10.08	1.37	13.67	1.8	-2.94	0.58	-0.24	0.85	-3.18	1.05	5.65	0.95	-5.52	1.31	0.13	1.6	6.3	1.55	4.31	1.56	10.61	2.07	-1.22	0.61	-2.7	1.2	-3.92	1.29	0.03	0.02	0.14	0.03	0.17	0.04	-1.18	0.61	-2.56	1.19	-3.75	1.27	5.12	1.2	1.75
	98	99	ASN	331	10.81	1.61	10.76	1.15	21.57	2.22	-1.65	0.68	-0.67	0.76	-2.32	1.16	-85.26	2.77	-0.66	1.31	-85.92	2.97	-76.1	3	9.43	1.33	-66.67	3.5	-2.65	1.9	-3.03	0.56	-5.68	2.06	0.51	0.06	0.1	0.02	0.6	0.07	-2.15	1.85	-2.93	0.55	-5.08	2	-78.24	1.62	6.5
	99	100	ARG	332	13.11	2.81	11.42	1.48	24.53	3.22	-2.79	0.98	-0.82	0.55	-3.61	1.15	-224.45	13.4	-2.61	1.12	-227.06	13.45	-214.13	13.35	7.99	1.34	-206.14	13.38	38.61	10.6	-6.73	0.82	31.88	10.58	0.9	0.13	0.18	0.03	1.08	0.13	39.51	10.52	-6.55	0.82	32.96	10.49	-174.62	3.91	1.44
	100	101	GLN	333	13.68	1.85	10.17	1.46	23.85	2.54	-0.09	0.71	0.77	0.75	0.68	1.1	-64.49	1.76	-11.55	0.99	-76.04	1.85	-50.9	2.23	-0.61	1.54	-51.51	2.74	-10.74	1.45	-6.03	0.77	-16.77	1.55	1.02	0.05	0.27	0.04	1.29	0.05	-9.71	1.43	-5.76	0.75	-15.48	1.53	-60.61	1.61	-6.37
	101	102	GLU	334	6.11	1.68	10.82	1.35	16.93	2.25	-0.99	0.55	-0.09	0.79	-1.08	1.01	45.01	4.98	0.77	1.58	45.77	5.94	50.13	4.95	11.5	1.98	61.62	6.11	-108.2	4.62	-11.3	1.26	-119.5	5.41	0.79	0.07	0.16	0.04	0.95	0.09	-107.41	4.6	-11.14	1.23	-118.55	5.37	-57.28	1.7	0.36
	102	103	VAL	335	6.35	1.52	9.9	1.22	16.25	2.11	-2.59	0.73	-0.47	0.83	-3.06	1.14	-22.64	0.51	-0.82	1.27	-23.46	1.31	-18.88	1.62	8.61	1.81	-10.27	2.62	7.34	0.47	-11.37	1.14	-4.03	1.09	0.02	0.02	0.02	0.02	0.04	0.03	7.36	0.47	-11.35	1.13	-3.99	1.07	-11.52	1.57	-2.73
	103	104	ASN	336	11.05	1.66	9.88	1.21	20.92	2.17	-1.62	0.75	-0.51	0.86	-2.13	1.23	-81.08	2.9	-7.27	1.35	-88.35	3.54	-71.65	2.79	2.09	1.8	-69.55	3.91	-5.18	2.42	-3.6	0.58	-8.77	2.77	0.54	0.06	0.03	0.01	0.57	0.06	-4.64	2.38	-3.57	0.58	-8.2	2.73	-76.29	1.6	-1.47
	104	105	ALA	337	2.89	0.94	11.22	1.49	14.11	1.9	-1.1	0.28	-2.04	0.68	-3.14	0.71	2.28	0.15	-3.36	0.94	-1.08	0.97	4.08	0.95	5.81	1.4	9.89	1.92	-0.29	0.06	-3.69	0.6	-3.99	0.62	0.17	0.04	0.05	0.01	0.22	0.04	-0.12	0.08	-3.64	0.6	-3.76	0.62	3.96	0.95	2.17
	105	106	VAL	338	6.45	1.83	10.78	1.35	17.24	2.31	0.63	0.68	-0.15	0.88	0.48	1.19	-21.09	0.49	-3.72	1.16	-24.8	1.23	-14.01	1.84	6.92	1.68	-7.09	2.75	5.85	0.39	-9.24	0.74	-3.38	0.72	0.78	0.04	0.02	0.02	0.8	0.04	6.63	0.39	-9.22	0.73	-2.58	0.71	-7.37	1.9	-2.3
	106	107	VAL	339	6.11	1.68	10.98	1.12	17.1	2.05	-2.05	0.72	-0.59	0.97	-2.64	1.3	-21.72	0.49	-5.17	1	-26.9	1.07	-17.66	1.91	5.23	1.51	-12.44	2.51	6.78	0.39	-8.48	0.5	-1.71	0.45	0.2	0.05	0.01	0.01	0.2	0.05	6.97	0.4	-8.47	0.5	-1.5	0.45	-10.69	1.87	-3.25
	107	108	LEU	340	8.84	1.79	11.45	1.41	20.29	2.31	-4.03	0.92	-2.28	0.9	-6.31	1.33	-27.95	0.42	-2.19	0.97	-30.14	1.02	-23.15	1.98	6.99	1.64	-16.16	2.6	4.69	0.3	-6.26	0.43	-1.57	0.42	0	0	0	0	0.01	0.01	4.69	0.3	-6.26	0.43	-1.56	0.42	-18.45	1.96	0.73
	108	109	LEU	341	8.66	1.82	11.32	1.33	19.98	2.29	-1.79	0.92	-0.97	1.01	-2.76	1.38	-28.48	0.53	-7	1.49	-35.49	1.57	-21.62	2.19	3.34	1.67	-18.27	2.75	4.65	0.33	-6.32	0.45	-1.67	0.43	0.26	0.08	0.01	0.01	0.27	0.08	4.91	0.34	-6.31	0.45	-1.4	0.43	-16.71	2.12	-2.97
	109	110	TYR	342	8.73	1.95	11.2	1.47	19.94	2.39	-1.55	0.69	-1.92	0.92	-3.47	1.2	-19.4	0.52	-9.04	1.1	-28.44	1.18	-12.22	2.12	0.25	1.55	-11.97	2.49	-2.74	0.5	-3.25	0.47	-6	0.75	0.77	0.07	0.02	0.01	0.79	0.07	-1.97	0.45	-3.23	0.47	-5.21	0.7	-14.19	2.09	-2.99
	110	111	MET	343	7.3	1.76	11.42	1.3	18.72	2.26	-6.47	0.56	-3.05	0.82	-9.52	1.05	-3.01	0.5	-6.75	1.08	-9.76	1.15	-2.18	1.76	1.62	1.5	-0.56	2.43	2.99	0.36	-4.2	0.46	-1.21	0.5	0	0.01	0	0	0	0.01	2.99	0.35	-4.2	0.46	-1.21	0.5	0.81	1.74	-2.57
	111	112	ALA	344	2.65	0.81	11.33	1.27	13.98	1.71	-1.84	0.29	-3.15	0.88	-5	0.89	2.31	0.11	-9.91	1.47	-7.6	1.5	3.12	0.88	-1.73	1.74	1.39	2.13	-0.29	0.04	-0.32	0.38	-0.61	0.39	0.01	0.01	0	0	0.01	0.01	-0.28	0.04	-0.32	0.38	-0.6	0.39	2.84	0.87	-2.05
	112	113	THR	345	6.75	1.4	11.26	1.32	18	2.05	-2.06	0.83	-0.89	1.05	-2.94	1.4	-26.6	1.05	-13.61	1.79	-40.22	1.9	-21.91	1.66	-3.24	1.84	-25.16	2.56	2.45	0.52	-3.95	0.58	-1.5	0.73	0.25	0.04	0.01	0.01	0.26	0.04	2.7	0.52	-3.94	0.57	-1.24	0.72	-19.22	1.6	-7.18
	113	114	GLN	346	13.65	1.76	10.48	1.27	24.12	2.17	-5.29	0.87	-3.02	0.65	-8.31	1.03	-75.94	1.47	-5.1	0.79	-81.03	1.55	-67.58	1.86	2.36	1.22	-65.21	2.33	1.84	0.67	-2.52	0.41	-0.68	0.84	0.08	0.03	0.01	0.01	0.1	0.03	1.93	0.67	-2.51	0.41	-0.58	0.85	-65.65	1.68	-0.15
	114	115	ILE	347	9.38	1.96	11.53	1.36	20.91	2.68	-3.55	0.92	-1.17	0.91	-4.72	1.31	-7.36	0.33	-5.66	1.02	-13.02	0.99	-1.52	2.03	4.7	1.68	3.17	2.7	5.66	0.29	-6.15	0.48	-0.49	0.41	0	0	0	0	0	0	5.66	0.29	-6.15	0.48	-0.49	0.41	4.14	2	-1.46
	115	116	SER	348	3.78	1.01	11.35	1.41	15.13	1.94	-2.59	0.61	-2.61	0.91	-5.2	1.19	-5.73	1.5	-9.23	1.12	-14.96	2.07	-4.53	1.85	-0.49	1.59	-5.03	2.85	2.86	0.88	-5.23	0.61	-2.37	1.11	0	0	0	0	0	0	2.86	0.88	-5.23	0.61	-2.37	1.11	-1.67	1.4	-5.73
	116	117	SER	349	3.58	0.85	11.24	1.26	14.82	1.54	-1.65	0.58	-2.95	0.64	-4.59	0.86	-5.74	2.22	-6.57	1.11	-12.31	2.52	-3.8	2	1.72	1.67	-2.08	2.57	1.21	1.25	-5.36	0.8	-4.15	1.58	0.16	0.03	0.01	0.01	0.17	0.03	1.37	1.24	-5.35	0.8	-3.98	1.57	-2.43	1.11	-3.63
	117	118	ALA	350	2.82	0.93	10.8	1.21	13.62	1.65	-2.11	0.38	-3.42	0.7	-5.53	0.72	2.27	0.13	-9.17	0.86	-6.9	0.87	2.98	1.05	-1.79	1.22	1.19	1.67	-0.23	0.05	0.68	0.37	0.45	0.39	0	0	0	0	0	0	-0.23	0.05	0.68	0.37	0.45	0.39	2.75	1.05	-1.11
	118	119	MET	351	7.28	1.8	11.03	1.26	18.31	2.23	-6.63	0.75	-2.65	0.9	-9.28	1.26	-3.94	0.47	-9.4	1.04	-13.34	1.03	-3.29	1.95	-1.03	1.42	-4.31	2.35	3.63	0.3	-3.31	0.55	0.32	0.51	0.01	0.01	0	0	0.01	0.01	3.64	0.3	-3.31	0.55	0.33	0.51	0.36	1.89	-4.34
	119	120	GLU	352	8.5	2.32	10.94	1.41	19.43	2.79	-3.03	0.94	-2.7	0.91	-5.73	1.37	20.49	4.44	-5.65	2.31	14.83	5.13	25.95	4.64	2.58	2.28	28.53	4.93	-81.95	4.2	-7.18	1.17	-89.12	4.45	0.28	0.04	0	0	0.28	0.04	-81.67	4.19	-7.18	1.17	-88.85	4.44	-55.72	2.15	-4.59
	120	121	TYR	353	8.22	1.97	11.48	1.39	19.7	2.62	-3.71	0.63	-2.82	0.67	-6.53	0.85	-17.81	1.05	-7.59	1.02	-25.39	1.33	-13.3	2.24	1.07	1.48	-12.23	2.94	-3.83	0.75	-0.32	0.65	-4.15	0.87	0.34	0.05	0	0	0.34	0.05	-3.5	0.77	-0.31	0.65	-3.81	0.88	-16.79	2.19	0.76
	121	122	LEU	354	8.97	2.02	11.56	1.5	20.53	2.67	-3.74	0.72	-2.49	0.7	-6.23	1.06	-27.66	0.41	-9.53	0.95	-37.2	1.01	-22.43	2.16	-0.46	1.66	-22.9	2.74	4.21	0.3	-2.66	0.6	1.56	0.57	0.01	0.01	0	0	0.01	0.01	4.23	0.3	-2.66	0.6	1.57	0.57	-18.21	2.17	-3.12
	122	123	GLU	355	5.88	1.89	11.45	1.46	17.33	2.56	-4.06	0.81	-1.62	0.79	-5.68	1.09	20.75	4.09	-1.12	1.17	19.63	4.38	22.57	4.3	8.71	1.63	31.28	5.01	-76.31	3.96	-6.92	0.95	-83.23	4.26	0.13	0.03	0.05	0.02	0.17	0.03	-76.18	3.96	-6.87	0.94	-83.05	4.26	-53.61	2.04	1.84
	123	124	LYS	356	11.04	2.26	10.74	1.27	21.78	2.65	-0.47	1	-0.51	0.71	-0.98	1.28	-69.38	6.06	1.11	1.48	-68.27	5.88	-58.81	5.97	11.34	1.97	-47.47	5.95	40.36	5.85	-3.78	0.99	36.58	5.72	0.82	0.06	0.25	0.02	1.07	0.06	41.18	5.81	-3.52	0.98	37.66	5.69	-17.62	2.45	7.81
	124	125	LYS	357	11.53	2.17	10	1.44	21.53	2.73	-2.89	0.9	0.25	0.76	-2.64	1.38	-31.94	10.14	-8.61	0.89	-40.56	10.33	-23.3	10.27	1.63	1.55	-21.67	10.6	5.03	9.23	-3.83	0.74	1.21	9.51	0.53	0.11	0.18	0.03	0.71	0.12	5.57	9.14	-3.65	0.73	1.92	9.41	-17.73	2.67	-2.01
	125	126	ASN	358	11.61	1.88	10.71	1.56	22.32	2.85	-0.75	0.52	-0.2	0.86	-0.95	1.17	-75.68	1.34	-14.38	1.62	-90.06	2.18	-64.82	1.72	-3.88	2.16	-68.69	3.06	-11.19	0.97	-1.59	1.22	-12.78	1.69	0.73	0.05	0.1	0.03	0.82	0.06	-10.46	0.95	-1.49	1.21	-11.96	1.67	-75.28	1.65	-5.37
	126	127	PHE	359	8.04	1.89	9.97	1.18	18	2.29	-1.99	0.74	-1.18	0.72	-3.17	0.97	0.14	0.4	-2.37	0.79	-2.24	0.89	6.18	2.14	6.42	1.53	12.6	2.73	0.07	0.31	-5.45	0.55	-5.38	0.62	0.24	0.12	0.04	0.01	0.29	0.12	0.32	0.32	-5.41	0.54	-5.09	0.64	6.49	2.12	1.01
	127	128	ILE	360	9.74	2.07	10.76	1.29	20.51	2.51	-2.04	0.99	-0.59	0.77	-2.63	1.39	-6.64	0.46	-0.73	1.44	-7.37	1.46	1.06	2.24	9.44	1.88	10.5	2.76	4.49	0.42	-8.43	1.37	-3.93	1.19	0.27	0.07	0.11	0.04	0.38	0.07	4.76	0.41	-8.31	1.34	-3.55	1.18	5.82	2.13	1.13
	128	129	HIS	361	24.9	1.61	11.6	1.24	36.49	2.05	-7.38	0.71	-1.16	0.92	-8.54	1.19	-12.4	1.38	-1.05	1.21	-13.46	1.94	5.12	1.92	9.38	1.76	14.49	2.75	-1.16	0.84	-5.53	1.08	-6.69	1.45	0.01	0.01	0.06	0.03	0.07	0.03	-1.15	0.84	-5.47	1.07	-6.62	1.44	3.97	1.78	3.91
	129	130	ARG	362	12.88	2.88	11.79	1.38	24.66	3.44	-2.96	1.02	-0.96	0.65	-3.92	1.39	-205.37	5.51	-11.52	1.01	-216.89	5.3	-195.45	6.46	-0.69	1.37	-196.14	6.42	21.48	5.49	-2.25	0.57	19.24	5.31	0.8	0.14	0.08	0.02	0.88	0.14	22.28	5.47	-2.17	0.57	20.12	5.28	-173.17	2.93	-2.85
	130	131	ASP	363	4.39	1.57	10.05	1.31	14.44	2.14	-0.34	1.66	-0.47	0.91	-0.81	2.2	-15.56	5.01	-9.19	1.6	-24.76	6.05	-11.52	4.89	0.39	1.77	-11.13	5.78	-51.58	4.28	-8.71	0.71	-60.3	4.91	0.03	0.02	0	0	0.03	0.02	-51.55	4.28	-8.71	0.71	-60.26	4.91	-63.07	1.75	-8.32
	131	132	LEU	364	8.69	1.84	11.67	1.26	20.36	2.41	-3.91	0.92	-2.38	0.78	-6.29	1.4	-28.83	0.38	0.21	0.75	-28.62	0.79	-24.05	2.06	9.5	1.32	-14.55	2.43	4.84	0.25	-6.79	0.48	-1.96	0.45	0	0	0	0	0	0.01	4.84	0.24	-6.79	0.48	-1.95	0.45	-19.21	2.02	2.71
	132	133	ALA	365	2.27	0.71	10.29	1.32	12.55	1.57	-1.86	0.44	-2.59	0.82	-4.45	0.95	2.29	0.11	-8.34	1.34	-6.05	1.33	2.7	0.85	-0.65	1.71	2.05	2.02	-0.38	0.06	0.02	0.47	-0.35	0.49	0	0	0	0	0	0	-0.38	0.06	0.02	0.47	-0.35	0.49	2.32	0.84	-0.62
	133	134	ALA	366	2.83	0.9	11.08	1.22	13.9	1.53	-2.03	0.4	-3.79	0.61	-5.82	0.74	1.95	0.15	0.63	1.4	2.58	1.37	2.74	1.01	7.92	1.96	10.67	2.15	-0.02	0.06	-0.99	0.68	-1.01	0.66	0	0	0	0	0	0	-0.02	0.06	-0.99	0.68	-1.01	0.66	2.72	1.01	6.93
	134	135	ARG	367	12.53	2.52	11.4	1.67	23.93	2.99	-4.9	1.28	-2.07	0.71	-6.97	1.48	-237.18	4.12	-1.63	1.01	-238.8	4.35	-229.54	4.21	7.7	1.66	-221.84	4.92	50.49	3.81	-5.95	0.59	44.54	3.83	0.18	0.04	0.01	0.01	0.19	0.04	50.67	3.81	-5.94	0.58	44.73	3.83	-178.88	2.31	1.76
	135	136	ASN	368	11.7	1.61	10.16	1.54	21.87	2.28	-3.4	0.9	-1.61	0.9	-5.01	1.38	-83.04	1.31	-14.02	1.12	-97.07	1.65	-74.74	1.62	-5.47	1.71	-80.21	2.44	-3.61	0.73	-0.51	0.39	-4.12	0.83	0.02	0.01	0	0	0.02	0.01	-3.59	0.73	-0.51	0.39	-4.1	0.83	-78.33	1.47	-5.98
	136	137	CYS	369	3.12	0.99	9.67	1.04	12.79	1.59	-4.2	0.41	-2.33	0.81	-6.53	0.87	6.66	0.64	-6.61	0.99	0.04	1.12	5.57	1.26	0.72	1.4	6.3	2.05	-1.89	0.35	-0.02	0.36	-1.91	0.44	0	0	0	0	0	0	-1.89	0.35	-0.02	0.36	-1.91	0.44	3.69	1.13	0.7
	137	138	LEU	370	8.68	1.98	10.54	1.38	19.22	2.55	-3.73	0.9	-1.82	0.94	-5.55	1.4	-27.42	0.39	-3.35	0.95	-30.77	0.97	-22.46	2.13	5.37	1.57	-17.09	2.73	4.15	0.25	-4.5	0.45	-0.35	0.41	0.05	0.02	0	0	0.05	0.02	4.2	0.25	-4.5	0.45	-0.31	0.41	-18.26	2.1	0.86
	138	139	VAL	371	6.3	1.38	9.8	1.18	16.1	1.99	-3.56	0.79	-1.99	0.91	-5.54	1.25	-23.69	0.49	-8.64	0.92	-32.33	0.97	-20.95	1.54	-0.82	1.57	-21.77	2.16	8.08	0.36	-7.44	0.7	0.64	0.57	0	0	0	0	0	0	8.08	0.36	-7.44	0.7	0.64	0.57	-12.87	1.5	-8.26
	139	140	GLY	372	0	0	9.18	1.39	9.18	1.39	0	0	-2.82	0.76	-2.82	0.76	0	0	-7.83	1.2	-7.83	1.2	0	0	-1.47	1.72	-1.47	1.72	0	0	-6.02	0.79	-6.02	0.79	0	0	0.03	0.01	0.03	0.01	0	0	-5.99	0.8	-5.99	0.8	0	0	-7.46
	140	141	GLU	373	6.31	1.74	9.62	1.26	15.93	2.23	-0.48	0.88	-0.68	0.71	-1.17	1.17	32.56	3.56	1.39	1.11	33.95	3.76	38.38	4.04	10.33	1.52	48.71	4.46	-95.08	3.46	-10.67	0.89	-105.75	3.65	0.78	0.03	0.09	0.02	0.86	0.03	-94.3	3.45	-10.59	0.88	-104.89	3.64	-55.92	1.73	-0.25
	141	142	ASN	374	11.35	2.08	11.04	1.3	22.39	2.5	-0.33	0.46	-0.35	0.68	-0.68	0.92	-75.28	1.52	-7.88	2.14	-83.16	2.29	-64.26	2.11	2.81	2.36	-61.45	2.94	-12.36	1.22	-1.46	1.44	-13.82	1.64	0.81	0.03	0.08	0.03	0.89	0.05	-11.55	1.21	-1.38	1.44	-12.93	1.62	-75.8	1.79	1.43
	142	143	HIS	375	24.95	1.69	11.1	1.44	36.05	2.37	-3.94	0.76	-2.09	0.66	-6.03	1.1	-13.87	2.66	-6.57	0.92	-20.44	2.62	7.14	3.12	2.44	1.71	9.58	3.56	-1.48	1.9	-3.68	0.46	-5.16	1.87	0.29	0.09	0.01	0.01	0.29	0.09	-1.19	1.83	-3.67	0.46	-4.86	1.79	5.95	1.91	-1.24
	143	144	LEU	376	11.03	1.87	10.86	1.36	21.89	2.43	-1.99	0.8	-1.19	0.86	-3.17	1.32	-28.4	0.41	-2.92	1.09	-31.32	1.2	-19.35	2.02	6.75	1.6	-12.6	2.72	4.25	0.3	-6.06	0.6	-1.81	0.67	0.4	0.05	0	0	0.4	0.05	4.66	0.29	-6.06	0.6	-1.41	0.68	-14.69	1.93	0.69
	144	145	VAL	377	6.49	1.91	10.2	1.39	16.69	2.39	-3.73	0.76	-1.85	0.82	-5.58	1.25	-22.82	0.4	-1.99	1.13	-24.81	1.14	-20.06	2.02	6.36	1.6	-13.7	2.7	7.27	0.3	-7.56	0.52	-0.29	0.41	0	0	0	0	0	0	7.27	0.3	-7.56	0.52	-0.29	0.41	-12.78	1.97	-1.2
	145	146	LYS	378	10.73	2.14	9.97	1.14	20.71	2.65	-5.22	0.99	-1.92	0.86	-7.14	1.16	-68.64	4.63	-7.54	0.84	-76.18	4.8	-63.12	4.76	0.51	1.25	-62.61	5.01	41.34	4.22	-2.17	0.33	39.18	4.23	0.19	0.04	0	0	0.19	0.04	41.53	4.21	-2.17	0.33	39.37	4.22	-21.59	2.61	-1.65
	146	147	VAL	379	6.18	1.6	9.82	1.3	16	2.17	-2.95	0.76	-1.65	0.83	-4.6	1.27	-21.68	0.43	-12.41	1.06	-34.1	1.05	-18.46	1.81	-4.24	1.62	-22.7	2.45	6.36	0.37	-6.29	0.53	0.07	0.4	0.01	0.01	0	0	0.01	0.01	6.38	0.37	-6.29	0.53	0.09	0.4	-12.08	1.79	-10.53
	147	148	ALA	380	2.33	0.67	9.55	1.4	11.87	1.73	-1.64	0.37	-1.47	0.78	-3.11	0.82	2.23	0.13	-7.76	0.86	-5.53	0.89	2.92	0.76	0.31	1.46	3.23	1.78	-0.25	0.06	-2.35	0.5	-2.6	0.52	0	0	0.02	0.01	0.02	0.01	-0.25	0.06	-2.33	0.5	-2.58	0.52	2.67	0.76	-2.02
	148	149	ASP	381	3.73	1.33	9.44	1.11	13.16	1.81	-2.72	0.67	-0.77	0.89	-3.49	1.26	25.23	7.18	-5.54	2.07	19.69	8.4	26.23	7.45	3.13	2.1	29.36	8.58	-85.31	7.18	-6.15	1.55	-91.46	8.18	0.17	0.06	0.03	0.01	0.2	0.06	-85.14	7.15	-6.12	1.55	-91.26	8.15	-58.91	1.29	-2.99
	149	150	PHE	382	7.24	1.62	8.85	1.5	16.1	2.43	-3.23	0.66	-0.71	0.64	-3.94	1.05	0.74	0.32	-3.61	1.05	-2.87	1.14	4.76	1.81	4.53	1.61	9.29	2.67	0.07	0.25	-3.86	0.86	-3.79	0.91	0.02	0.01	0.12	0.04	0.14	0.05	0.09	0.24	-3.74	0.85	-3.65	0.9	4.85	1.79	0.79
	150	151	GLY	383	0	0	9.22	1.54	9.22	1.54	0	0	-1.49	0.71	-1.49	0.71	0	0	-11.4	2.25	-11.4	2.25	0	0	-3.67	2.44	-3.67	2.44	0	0	0.57	1.25	0.57	1.25	0	0	0.18	0.05	0.18	0.05	0	0	0.75	1.24	0.75	1.24	0	0	-2.92
	151	152	LEU	384	8.44	1.72	11.11	1.43	19.55	2.27	-2.78	0.85	-1.29	0.99	-4.07	1.38	-27.69	0.47	-6.05	1.34	-33.74	1.35	-22.03	1.98	3.77	1.85	-18.26	2.61	3.67	0.33	-3.6	0.69	0.06	0.67	0.1	0.05	0.01	0.01	0.11	0.05	3.76	0.33	-3.59	0.69	0.17	0.65	-18.26	1.92	0.18
	152	153	SER	385	3.82	1.23	10.68	1.28	14.5	1.87	-2.04	0.38	-1.39	0.74	-3.43	0.91	-2.86	0.89	-5.5	1.76	-8.36	2.05	-1.08	1.7	3.79	1.94	2.71	2.68	0.06	0.85	-2.05	0.99	-1.99	1.09	0.14	0.05	0.02	0.01	0.16	0.05	0.2	0.84	-2.03	0.99	-1.83	1.08	-0.88	1.54	1.76
	153	154	ARG	386	13.59	2.74	10.36	1.31	23.95	3.01	-0.17	1.33	0.26	0.77	0.09	1.6	-235.69	9.96	-1.17	1.79	-236.86	9.52	-222.27	9.85	9.45	2.01	-212.82	9.42	44.78	8.72	-6.08	1.61	38.71	8.14	0.97	0.18	0.22	0.05	1.19	0.19	45.75	8.81	-5.86	1.57	39.89	8.23	-176.52	2.94	3.6
	154	155	LEU	387	8.5	1.94	10.74	1.4	19.24	2.33	-0.59	0.8	0.33	0.76	-0.26	1.24	-27.17	0.57	-5.63	1.14	-32.8	1.01	-19.26	2.04	5.44	1.37	-13.82	2.27	3.44	0.47	-7.64	0.76	-4.2	0.58	0.63	0.12	0.23	0.04	0.87	0.13	4.07	0.5	-7.4	0.75	-3.33	0.56	-15.19	2.02	-1.96
	155	156	MET	388	6.98	1.8	9.59	1.28	16.58	2.32	-3.13	0.66	-0.4	0.92	-3.53	1.14	-1	0.83	-9.66	1.48	-10.67	1.62	2.85	2.15	-0.46	1.6	2.39	2.68	0.38	0.64	-2.88	0.68	-2.5	0.91	0.58	0.1	0.04	0.02	0.62	0.1	0.95	0.64	-2.84	0.68	-1.89	0.89	3.8	1.96	-3.3
	156	157	THR	389	6.29	1.42	9.57	1.25	15.86	1.95	-0.94	0.6	0.08	0.64	-0.86	0.96	-24.75	1.55	-7.6	0.9	-32.35	1.9	-19.39	1.92	2.04	1.31	-17.35	2.47	-0.15	0.68	-6.3	0.54	-6.45	0.87	0.48	0.05	0.21	0.04	0.69	0.06	0.33	0.66	-6.09	0.53	-5.75	0.85	-19.06	1.7	-4.05
	157	158	GLY	390	0	0	9.23	1.43	9.23	1.43	0	0	-1.91	0.62	-1.91	0.62	0	0	-8.76	1.46	-8.76	1.46	0	0	-1.43	1.99	-1.43	1.99	0	0	-3.6	0.85	-3.6	0.85	0	0	0.26	0.05	0.26	0.05	0	0	-3.34	0.82	-3.34	0.82	0	0	-4.77
	158	159	ASP	391	4.25	1.52	11.04	1.29	15.29	2.18	-0.95	0.33	-1.01	0.64	-1.96	0.81	21.87	3.04	-0.18	1.12	21.7	3.65	25.18	3.6	9.86	1.66	35.03	4.52	-86.16	3.31	-12.66	1.01	-98.82	4.02	0.71	0.06	0.11	0.03	0.82	0.08	-85.45	3.27	-12.55	1	-98	3.98	-60.27	1.33	-2.69
	159	160	THR	392	6.5	1.58	11.54	1.26	18.04	2.11	-2.15	0.58	-1.23	0.68	-3.38	0.99	-20.87	1.19	-6.73	1.25	-27.6	2.09	-16.52	1.59	3.58	1.69	-12.94	2.56	-2.16	0.9	-6.32	0.72	-8.47	1.34	0.27	0.04	0.03	0.01	0.3	0.05	-1.89	0.91	-6.28	0.72	-8.17	1.34	-18.41	1.59	-2.71
	160	161	TYR	393	8.24	2.07	11.77	1.42	20.01	2.63	-4.4	0.98	-2.56	0.83	-6.96	1.35	-24.58	1.09	-8.19	1.13	-32.77	1.53	-20.74	2.36	1.02	1.73	-19.72	3.25	0.02	0.49	-1.27	0.64	-1.26	0.79	0.05	0.03	0	0	0.05	0.03	0.07	0.48	-1.27	0.64	-1.21	0.78	-20.67	2.31	-0.26
	161	162	THR	394	6.6	1.49	10.9	1.13	17.5	1.94	-2.82	0.71	-1.21	0.88	-4.03	1.23	-23.58	1.58	-11.42	1.54	-35	2.5	-19.8	2.06	-1.73	1.66	-21.53	2.61	0.49	1.17	-2.64	0.89	-2.16	1.52	0.08	0.04	0	0.01	0.08	0.04	0.57	1.14	-2.64	0.89	-2.07	1.5	-19.23	1.57	-4.37
	162	163	ALA	395	2.68	0.85	10.35	1.31	13.03	1.72	-0.92	0.38	-1.27	0.7	-2.19	0.87	2.47	0.15	-0.95	1.65	1.52	1.66	4.23	0.97	8.13	1.78	12.36	2.12	-0.4	0.08	-4.79	1.27	-5.18	1.27	0.23	0.05	0.19	0.04	0.42	0.07	-0.17	0.09	-4.59	1.25	-4.76	1.22	4.06	0.99	3.54
	163	164	HIS	396	24.76	1.74	9.71	1.3	34.47	2.22	-3.72	0.61	-0.79	0.81	-4.51	1.13	-12.49	1.6	-5.3	1.35	-17.79	2.56	8.55	2.58	3.62	1.73	12.17	3.43	-3.85	1.44	-5.18	0.99	-9.03	2.05	0.58	0.07	0.06	0.02	0.64	0.07	-3.28	1.4	-5.12	0.99	-8.39	2.02	5.28	1.78	-1.5
	164	165	ALA	397	2.47	0.79	9.88	1.43	12.35	1.8	-0.22	0.38	0.38	0.52	0.16	0.68	2.04	0.11	-1.53	1.25	0.51	1.25	4.29	0.91	8.73	1.72	13.02	2.1	0.13	0.06	-8.31	0.92	-8.18	0.9	0.32	0.07	0.38	0.05	0.7	0.1	0.45	0.08	-7.93	0.91	-7.48	0.87	4.73	0.93	0.8
	165	166	GLY	398	0	0	9.19	1.29	9.19	1.29	0	0	0.31	0.64	0.31	0.64	0	0	-6.46	1.51	-6.46	1.51	0	0	3.04	2.05	3.04	2.05	0	0	-6.64	1.32	-6.64	1.32	0	0	0.65	0.06	0.65	0.06	0	0	-5.99	1.27	-5.99	1.27	0	0	-2.95
	166	167	ALA	399	2.51	0.87	9.8	1.57	12.31	1.93	-0.79	0.33	-0.66	0.87	-1.45	0.9	2.18	0.11	-0.94	1.4	1.24	1.44	3.9	0.88	8.21	1.76	12.11	1.99	0.09	0.07	-2.43	0.66	-2.34	0.66	0.22	0.05	0.07	0.02	0.29	0.05	0.31	0.08	-2.36	0.66	-2.05	0.65	4.2	0.89	5.85
	167	168	LYS	400	10.77	2.25	10.52	1.32	21.29	2.91	-2.41	1.1	-0.82	0.66	-3.23	1.33	-49.95	5.56	-2.31	0.89	-52.26	5.47	-41.59	5.81	7.39	1.52	-34.2	6.02	24.24	4.93	-5.21	0.73	19.03	5.02	0.42	0.04	0.18	0.02	0.6	0.04	24.66	4.92	-5.03	0.72	19.63	5	-16.93	2.8	2.37
	168	169	PHE	401	8.11	2.05	12.43	1.41	20.54	2.48	-3.06	0.77	-1.36	0.81	-4.42	1.22	1.07	0.48	-2.72	0.96	-1.66	1.11	6.12	2.42	8.35	1.66	14.47	2.96	-0.51	0.41	-2.07	0.53	-2.58	0.73	0.14	0.06	0.01	0.01	0.15	0.06	-0.36	0.4	-2.06	0.53	-2.42	0.72	5.75	2.3	6.29
	169	170	PRO	402	12.77	1.41	15.74	1.27	28.51	2.2	-3.38	0.59	-1.82	0.91	-5.2	1.19	-8.96	0.99	-0.75	1.45	-9.71	1.28	0.43	1.8	13.18	1.82	13.61	2.61	8.51	0.9	-10	0.83	-1.49	0.35	0.07	0.03	0	0	0.07	0.03	8.58	0.89	-10	0.83	-1.42	0.34	9.01	1.52	3.17
	170	171	ILE	403	9.41	1.78	12.41	1.19	21.82	2.22	-5.26	0.79	-1.63	0.9	-6.89	1.38	-6.61	0.33	3.17	0.99	-3.43	1	-2.45	2.01	13.96	1.5	11.5	2.69	4.64	0.29	-8.27	0.66	-3.63	0.67	0	0	0	0	0.01	0.01	4.64	0.29	-8.26	0.66	-3.63	0.67	2.18	2	5.69
	171	172	LYS	404	10.79	2.3	10.19	1.21	20.98	2.68	-4.3	0.8	-1.99	0.56	-6.29	0.95	-59.33	4.4	-3.6	0.93	-62.93	4.37	-52.83	4.91	4.6	1.21	-48.24	4.73	34.59	4.31	-4.93	0.58	29.66	4.36	0.17	0.04	0	0.01	0.18	0.04	34.76	4.28	-4.93	0.58	29.83	4.34	-18.07	2.6	-0.33
	172	173	TRP	405	11.14	2.33	9.92	1.45	21.07	2.76	-8.39	0.78	-1.95	0.84	-10.34	1.2	0.27	0.69	-10.2	1.01	-9.93	1.24	3.02	2.59	-2.23	1.25	0.8	2.96	1.98	0.43	-4.4	0.5	-2.42	0.58	0.08	0.02	0.02	0.01	0.1	0.02	2.06	0.43	-4.38	0.5	-2.32	0.58	5.09	2.56	-6.61
	173	174	THR	406	6.41	1.73	10.04	1.07	16.45	2.16	-3.51	0.78	-1.95	0.65	-5.47	1.08	-25.73	1.31	-6.61	1.11	-32.34	2	-22.83	2.13	1.48	1.15	-21.36	2.6	2.86	0.81	-6.83	0.86	-3.97	1.44	0.01	0.01	0.04	0.01	0.04	0.01	2.87	0.81	-6.8	0.85	-3.93	1.44	-19.96	1.82	-5.32
	174	175	ALA	407	2.58	0.75	11	1.22	13.58	1.57	-2.29	0.39	-2.52	0.62	-4.82	0.69	2.44	0.13	2.08	0.98	4.51	1	2.72	0.86	10.56	1.42	13.28	1.68	-0.22	0.05	-0.85	0.48	-1.07	0.5	0	0	0.01	0.01	0.01	0.01	-0.22	0.05	-0.84	0.48	-1.06	0.5	2.5	0.86	9.72
	175	176	PRO	408	12.29	1.23	14.11	1.14	26.4	1.75	-4.47	0.62	-2.72	0.72	-7.19	0.84	-13.37	0.78	1.61	1.31	-11.76	1.13	-5.56	1.67	13.01	1.67	7.45	2.2	12.43	0.71	-13.65	0.94	-1.22	0.68	0.02	0.02	0.01	0.01	0.03	0.02	12.45	0.71	-13.64	0.94	-1.19	0.68	6.9	1.47	-0.63
	176	177	GLU	409	7.73	1.71	10.53	1.24	18.26	2.05	-2.31	1.31	-2.21	0.85	-4.52	1.76	-16.44	4.3	-8.63	0.99	-25.07	4.47	-11.02	4.12	-0.31	1.49	-11.33	4.45	-47.39	3.27	-5.47	0.61	-52.86	3.42	0.08	0.03	0.01	0.01	0.09	0.04	-47.31	3.26	-5.46	0.61	-52.77	3.42	-58.33	2.12	-5.77
	177	178	SER	410	3.65	0.93	10.84	1.3	14.49	1.73	-2.16	0.67	-2.57	0.8	-4.73	1.08	-7.04	0.85	-6.01	0.93	-13.05	1.2	-5.55	1.17	2.25	1.67	-3.29	2.16	1.44	0.33	-4.03	0.76	-2.6	0.75	0	0	0	0.01	0.01	0.01	1.44	0.33	-4.03	0.76	-2.59	0.74	-4.11	1.09	-1.78
	178	179	LEU	411	9.14	2.09	11.85	1.36	21	2.61	-2.87	0.92	-1.42	0.79	-4.29	1.46	-28.89	0.4	-1.01	0.88	-29.89	0.92	-22.62	2.18	9.43	1.23	-13.19	2.64	4.94	0.31	-8.58	0.64	-3.65	0.64	0.16	0.06	0.12	0.02	0.28	0.06	5.09	0.29	-8.46	0.63	-3.37	0.63	-17.53	2.16	0.97
	179	180	ALA	412	2.66	0.79	11.49	1.28	14.14	1.5	-1.22	0.31	-1.02	0.64	-2.24	0.73	2.34	0.14	-6.71	1.01	-4.38	1.06	3.77	0.89	3.76	1.56	7.53	1.89	-0.21	0.1	-4.76	0.59	-4.97	0.65	0.14	0.05	0.26	0.02	0.41	0.06	-0.07	0.1	-4.5	0.58	-4.57	0.63	3.7	0.87	-0.74
	180	181	TYR	413	8.64	1.85	9.98	1.42	18.63	2.5	0.68	0.69	0.15	0.77	0.82	1.13	-16.73	0.82	-5.82	0.87	-22.55	1.04	-7.41	2.05	4.31	1.36	-3.1	2.4	-6.07	0.86	-3.54	0.81	-9.61	0.97	1.02	0.12	0.19	0.03	1.21	0.12	-5.05	0.78	-3.35	0.79	-8.4	0.91	-12.46	1.9	0.96
	181	182	ASN	414	11.77	1.89	10.71	1.33	22.48	2.5	-0.53	0.59	-0.55	0.76	-1.08	1.1	-76.38	1.52	-3.98	1.67	-80.36	1.69	-65.15	1.87	6.18	2.05	-58.97	2.67	-10.49	1.21	-1.3	1.25	-11.79	1.21	0.76	0.06	0.1	0.02	0.86	0.07	-9.73	1.17	-1.2	1.25	-10.93	1.19	-74.87	1.48	4.98
	182	183	LYS	415	11.33	2.27	9.89	1.4	21.23	2.79	-1.63	0.67	-0.77	0.92	-2.4	1.1	-15.55	3.27	-3.58	1.09	-19.12	3.7	-5.84	4.68	5.54	1.44	-0.3	5.26	-11.42	3.36	-5.35	0.56	-16.77	3.64	0.97	0.08	0.04	0.01	1	0.08	-10.45	3.35	-5.31	0.56	-15.76	3.63	-16.29	2.5	0.23
	183	184	PHE	416	7.85	1.73	9.89	1.27	17.74	2.19	-2.29	0.81	-1.14	0.61	-3.44	1.03	-0.28	0.57	-11.13	1.17	-11.41	1.27	5.27	2.01	-2.38	1.79	2.89	2.78	0.17	0.42	-2.78	1.04	-2.62	1.07	0.26	0.1	0.18	0.03	0.44	0.1	0.43	0.38	-2.6	1.02	-2.17	1.05	5.7	1.97	-4.98
	184	185	SER	417	3.11	0.99	9.8	1.21	12.9	1.56	-1.03	0.61	-1.14	1.03	-2.17	1.15	-2.11	1.61	-4.82	1.22	-6.93	2.18	-0.03	1.66	3.84	1.54	3.81	2.26	-2.79	1.15	-4.66	0.68	-7.45	1.52	0.27	0.04	0.02	0.01	0.29	0.04	-2.52	1.16	-4.64	0.67	-7.16	1.53	-2.55	1.23	-0.8
	185	186	ILE	418	9.65	2.02	11.15	1.41	20.79	2.36	-1.98	0.9	-1.09	0.75	-3.07	1.24	-6.9	0.46	5.56	1.18	-1.34	1.24	0.76	2.12	15.62	1.62	16.39	2.51	4.68	0.39	-9.08	0.89	-4.4	0.97	0.28	0.05	0	0	0.29	0.05	4.97	0.4	-9.07	0.88	-4.11	0.94	5.73	2.13	6.55
	186	187	LYS	419	11.89	2.14	10.64	1.31	22.54	2.59	-4.2	0.98	-1.19	0.92	-5.39	1.37	-65.79	5.94	-8.84	0.99	-74.63	5.96	-58.1	6.26	0.61	1.49	-57.49	6.56	40.9	5.36	-3.79	0.48	37.11	5.45	0.31	0.04	0	0	0.31	0.04	41.21	5.35	-3.79	0.48	37.42	5.43	-16.89	2.26	-3.18
	187	188	SER	420	3.58	0.94	10.87	1.35	14.45	1.81	-2.24	0.85	-2.65	0.81	-4.89	1.22	-11.69	1.49	-12.93	0.95	-24.61	1.83	-10.34	1.39	-4.71	1.56	-15.05	2.19	4.39	0.36	-5.4	0.58	-1.01	0.55	0.02	0.01	0.02	0.01	0.04	0.01	4.41	0.36	-5.38	0.58	-0.97	0.54	-5.93	1.28	-10.09
	188	189	ASP	421	4.45	1.2	10.9	1.52	15.35	2.11	-4.11	0.72	-2.1	0.83	-6.22	1.15	9.3	3.61	-0.62	0.88	8.68	3.86	9.64	3.61	8.18	1.59	17.81	4.15	-65.8	3.28	-9.82	0.47	-75.61	3.55	0.01	0.01	0	0	0.01	0.01	-65.79	3.28	-9.81	0.47	-75.6	3.55	-56.15	1.45	-1.63
	189	190	VAL	422	6.33	1.78	11.12	1.31	17.45	2.24	-3.71	0.72	-1.72	0.84	-5.43	1.07	-21.86	0.39	-5.39	1	-27.25	1.02	-19.24	1.88	4.02	1.43	-15.23	2.3	6.97	0.29	-8.24	0.43	-1.27	0.43	0	0	0	0	0	0	6.97	0.29	-8.24	0.43	-1.27	0.43	-12.27	1.86	-4.22
	190	191	TRP	423	10.51	1.96	10.83	1.2	21.34	2.4	-10.45	0.66	-3.68	0.68	-14.13	0.98	5.87	0.83	-9.77	0.96	-3.9	1.15	5.93	2.19	-2.61	1.38	3.31	2.56	0.36	0.58	-2.57	0.43	-2.21	0.59	0.03	0.02	0	0	0.03	0.02	0.39	0.59	-2.57	0.43	-2.18	0.59	6.32	2.08	-5.18
	191	192	ALA	424	2.79	0.87	10.95	1.06	13.74	1.49	-1.82	0.43	-3.46	0.82	-5.28	0.98	2.11	0.12	-9.42	0.92	-7.3	0.92	3.08	1.02	-1.93	1.29	1.15	1.85	-0.16	0.06	-0.06	0.34	-0.22	0.36	0.02	0.01	0	0	0.02	0.01	-0.14	0.05	-0.06	0.34	-0.2	0.36	2.94	1.02	-1.99
	192	193	PHE	425	7.44	1.71	9.97	1.19	17.41	2.17	-4.9	0.56	-2.56	0.87	-7.46	1.04	0.15	0.22	-8.66	1.06	-8.51	1.11	2.69	1.74	-1.24	1.39	1.44	2.33	0.58	0.18	-1.93	0.31	-1.34	0.35	0	0	0	0	0	0	0.58	0.18	-1.93	0.31	-1.34	0.35	3.27	1.75	-3.17
	193	194	GLY	426	0	0	9.34	1.4	9.34	1.4	0	0	-5.52	0.69	-5.52	0.69	0	0	-8.29	0.83	-8.29	0.83	0	0	-4.48	1.32	-4.48	1.32	0	0	-0.79	0.38	-0.79	0.38	0	0	0	0	0	0	0	0	-0.79	0.38	-0.79	0.38	0	0	-5.27
	194	195	VAL	427	6.33	1.69	10.63	1.3	16.96	2.32	-3.17	0.75	-1.8	0.94	-4.97	1.21	-21.71	0.4	-4.89	1.11	-26.61	1.06	-18.55	1.88	3.93	1.37	-14.62	2.14	6.42	0.3	-7.79	0.59	-1.37	0.43	0.01	0.01	0	0	0.01	0.01	6.42	0.3	-7.79	0.59	-1.36	0.43	-12.13	1.86	-3.85
	195	196	LEU	428	9.49	1.96	12.03	1.33	21.52	2.57	-4.07	0.98	-2.33	0.83	-6.39	1.3	-28.57	0.4	-2.52	0.88	-31.09	0.91	-23.14	2.2	7.18	1.55	-15.96	2.75	4.7	0.23	-5.98	0.4	-1.28	0.33	0	0	0	0	0	0	4.7	0.23	-5.98	0.4	-1.28	0.33	-18.44	2.19	1.2
	196	197	LEU	429	9.1	1.92	11.6	1.36	20.7	2.55	-3.91	0.87	-2.57	0.84	-6.48	1.29	-28.19	0.37	-4.91	0.91	-33.1	1.02	-23	2.2	4.11	1.63	-18.88	2.83	4.62	0.19	-5.67	0.45	-1.05	0.42	0.01	0.01	0	0	0.01	0.01	4.63	0.19	-5.67	0.45	-1.04	0.42	-18.37	2.18	-1.56
	197	198	TRP	430	10.88	2.02	11.07	1.13	21.94	2.32	-9.79	0.68	-3.99	0.72	-13.78	1	3.97	0.83	-12.53	1.38	-8.56	1.48	5.06	2.19	-5.45	1.63	-0.39	2.62	1.21	0.42	-2.68	0.46	-1.47	0.69	0.08	0.03	0	0	0.08	0.03	1.29	0.42	-2.68	0.46	-1.4	0.69	6.35	2.17	-8.14
	198	199	GLU	431	6.43	1.71	11.21	1.27	17.63	2.18	-5.58	0.71	-2.98	0.73	-8.56	1.03	21.14	3.68	-3.04	1.18	18.1	4.34	21.99	3.83	5.19	1.64	27.17	4.47	-74.67	3.51	-8.84	0.7	-83.5	3.93	0.02	0.01	0	0	0.02	0.01	-74.64	3.51	-8.84	0.7	-83.48	3.93	-52.66	1.78	-3.65
	199	200	ILE	432	9.03	1.76	12.07	1.46	21.1	2.42	-3.39	0.99	-1.62	0.74	-5.01	1.28	-7.75	0.32	-4.14	0.98	-11.89	0.89	-2.11	2.01	6.31	1.66	4.2	2.5	5.95	0.28	-7.39	0.73	-1.44	0.57	0.01	0.01	0	0	0.01	0.01	5.97	0.28	-7.39	0.73	-1.43	0.57	3.86	1.91	-1.09
	200	201	ALA	433	2.77	0.86	10.62	1.4	13.39	1.72	-1.83	0.42	-3	0.72	-4.83	0.8	2.38	0.15	-10.67	1.19	-8.3	1.22	3.32	0.91	-3.05	1.38	0.27	1.78	-0.35	0.08	0.53	0.88	0.18	0.92	0	0	0	0	0	0	-0.35	0.08	0.54	0.88	0.19	0.92	2.97	0.91	-2.51
	201	202	THR	434	6.66	1.48	10.01	1.58	16.67	2.14	-2.94	0.9	-0.63	0.87	-3.56	1.4	-26.6	1.29	-9.34	1.42	-35.94	1.37	-22.88	1.98	0.04	2.14	-22.84	2.55	2.1	0.59	-5.03	1.04	-2.92	0.92	0.09	0.04	0.06	0.03	0.15	0.05	2.19	0.57	-4.96	1.03	-2.77	0.91	-20.69	1.78	-4.92
	202	203	TYR	435	8.5	2.03	9.37	1.24	17.87	2.52	-3.73	0.77	-2	0.74	-5.72	1.09	-17.79	0.79	-3.86	1.05	-21.65	1.27	-13.01	2.17	3.51	1.6	-9.5	2.76	-2.42	0.71	-4.82	0.94	-7.23	1	0.1	0.04	0.03	0.02	0.13	0.04	-2.32	0.7	-4.78	0.93	-7.1	0.98	-15.33	2.2	-1.28
	203	204	GLY	436	0	0	10.32	1.75	10.32	1.75	0	0	-2.56	0.84	-2.56	0.84	0	0	-16.05	1.98	-16.05	1.98	0	0	-8.29	2.48	-8.29	2.48	0	0	1.25	0.95	1.25	0.95	0	0	0.02	0.02	0.02	0.02	0	0	1.27	0.94	1.27	0.94	0	0	-7.02
	204	205	MET	437	7.64	1.72	9.69	1.21	17.32	2.16	-2.3	0.81	-1.35	0.73	-3.65	1.15	-2.39	1.13	-0.8	1.35	-3.19	1.83	2.95	2.49	7.54	1.71	10.48	3.38	1.38	0.89	-8.25	0.76	-6.87	1.26	0.8	0.1	0.03	0.02	0.84	0.1	2.19	0.85	-8.22	0.76	-6.03	1.23	5.13	2.11	-0.68
	205	206	SER	438	3.52	0.88	12.26	1.57	15.78	1.94	-0.98	0.29	-0.35	0.59	-1.33	0.65	-2.98	0.82	4.13	1.03	1.15	1.42	-0.44	1.28	16.05	1.88	15.6	2.59	-1.91	0.71	-6.54	0.91	-8.45	1.13	0.4	0.05	0.05	0.02	0.45	0.06	-1.51	0.69	-6.49	0.9	-8	1.1	-1.96	1.08	9.56
	206	207	PRO	439	12.61	1.59	13.22	1.14	25.83	2.21	-3.94	0.54	-1.6	0.97	-5.54	1.08	-11.28	0.99	-0.52	2.09	-11.8	1.81	-2.61	1.99	11.11	2.1	8.5	2.33	10.55	0.87	-9.86	1.26	0.69	0.88	0.02	0.02	0	0	0.02	0.02	10.57	0.87	-9.86	1.26	0.72	0.88	7.96	1.65	1.25
	207	208	TYR	440	8.89	2.27	12.62	1.4	21.51	2.88	-3.93	0.78	-0.95	0.86	-4.87	1.32	-17.75	0.51	3.54	1.02	-14.22	1.09	-12.79	2.37	15.22	1.46	2.42	3.02	-2.14	0.42	-4.45	0.73	-6.58	0.79	0.05	0.02	0.02	0.01	0.06	0.02	-2.09	0.42	-4.43	0.73	-6.52	0.78	-14.88	2.31	10.78
	208	209	PRO	441	12.21	1.49	12.23	1.07	24.45	1.97	-1.76	0.63	-0.38	0.67	-2.14	0.95	-10.66	0.71	7.56	1.05	-3.1	0.78	-0.2	1.83	19.41	1.48	19.2	2.31	9.94	0.65	-15.72	0.89	-5.78	0.7	0.4	0.08	0.12	0.02	0.52	0.09	10.35	0.65	-15.6	0.89	-5.25	0.69	10.14	1.62	3.81
	209	210	GLY	442	0	0	9.49	1.54	9.49	1.54	0	0	-0.69	0.38	-0.69	0.38	0	0	-5.28	0.77	-5.28	0.77	0	0	3.52	1.64	3.52	1.64	0	0	-7.1	0.47	-7.1	0.47	0	0	0.69	0.02	0.69	0.02	0	0	-6.41	0.47	-6.41	0.47	0	0	-2.9
	210	211	ILE	443	9.76	1.89	9.38	1.18	19.14	2.44	-1.81	0.99	0.88	0.72	-0.93	1.39	-7.2	0.34	-4.08	0.81	-11.28	0.91	0.74	2.01	6.18	1.5	6.92	2.6	5.15	0.31	-8.6	0.69	-3.45	0.74	0.23	0.06	0.13	0.03	0.36	0.06	5.38	0.31	-8.47	0.68	-3.1	0.73	6.12	2	-2.29
	211	212	ASP	444	4.19	1.46	9.73	1.11	13.92	1.86	-0.28	1.08	-0.57	0.8	-0.85	1.38	15.57	4.71	-0.28	1.36	15.29	4.96	19.48	4.52	8.88	1.61	28.36	5.17	-82.38	3.97	-10	0.71	-92.38	4.08	0.55	0.05	0.09	0.02	0.64	0.05	-81.83	3.94	-9.91	0.7	-91.74	4.06	-62.35	1.68	-1.04
	212	213	LEU	445	8.76	1.78	11.5	1.45	20.25	2.34	-1.38	0.91	-1.34	0.79	-2.71	1.38	-28.21	0.41	-2.6	0.87	-30.81	0.89	-20.82	1.91	7.55	1.54	-13.27	2.49	4.15	0.31	-5.94	0.53	-1.79	0.59	0.31	0.09	0.04	0.02	0.35	0.09	4.46	0.34	-5.9	0.53	-1.44	0.57	-16.37	1.89	1.65
	213	214	SER	446	3.59	1.03	10.55	1.53	14.14	2.01	-0.11	0.99	-1.35	0.8	-1.46	1.27	-8.37	2.89	-9.66	1.31	-18.03	3.32	-4.89	2.39	-0.46	1.72	-5.35	2.97	0.98	1.45	-4.82	1.02	-3.84	1.75	0.33	0.06	0.05	0.03	0.37	0.08	1.31	1.43	-4.77	1	-3.46	1.71	-3.58	1.31	-5.23
	214	215	GLN	447	14.14	2.26	10.49	1.23	24.63	2.7	-2.37	0.71	-0.93	0.88	-3.3	1.24	-65.93	2.37	-6.39	1.13	-72.33	2.71	-54.17	2.6	3.17	1.62	-51	3.36	-8.19	1.75	-3	0.59	-11.19	1.98	0.57	0.11	0.02	0.02	0.59	0.11	-7.62	1.77	-2.98	0.59	-10.6	1.99	-61.78	1.97	0.19
	215	216	VAL	448	6.63	1.98	11	1.53	17.62	2.79	-3.36	0.86	-1.43	0.83	-4.79	1.27	-21.29	0.45	-5.83	1.02	-27.12	1.15	-18.02	2.1	3.73	1.74	-14.29	2.74	6.21	0.3	-8.68	0.53	-2.47	0.51	0	0	0	0	0	0	6.22	0.3	-8.68	0.53	-2.46	0.51	-11.8	2.1	-4.95
	216	217	TYR	449	9.17	2.08	11.08	1.43	20.26	2.47	-4.7	0.93	-2.15	0.76	-6.85	1.34	-21.27	1.87	-5.41	0.95	-26.68	2.13	-16.8	2.77	3.53	1.72	-13.27	3.38	0.1	0.83	-6.72	0.9	-6.63	1.21	0.12	0.04	0.02	0.02	0.14	0.04	0.22	0.82	-6.7	0.9	-6.48	1.19	-16.58	2.41	-3.17
	217	218	GLU	450	6.58	1.8	10.98	1.27	17.56	2.52	-1.21	0.79	-1.37	0.89	-2.58	1.31	21.17	8.21	0.91	1.35	22.08	8.61	26.53	7.97	10.52	1.68	37.06	8.22	-85.13	7.72	-10.05	0.76	-95.18	8.02	0.57	0.09	0.02	0.01	0.6	0.1	-84.56	7.66	-10.02	0.75	-94.58	7.96	-58.03	1.7	0.5
	218	219	LEU	451	9.05	1.96	11.01	1.4	20.06	2.5	-2.61	0.96	-2.13	0.86	-4.73	1.37	-27.77	0.4	-0.57	1.02	-28.34	1.15	-21.33	2.15	8.32	1.61	-13.01	2.81	4.27	0.24	-6.86	0.58	-2.59	0.58	0.19	0.05	0	0	0.19	0.05	4.46	0.26	-6.86	0.58	-2.4	0.58	-16.87	2.12	1.46
	219	220	LEU	452	8.73	1.71	11.05	1.4	19.78	2.54	-4.1	0.87	-1.37	0.88	-5.47	1.35	-29.22	0.35	-5.19	0.77	-34.41	0.84	-24.59	2	4.49	1.39	-20.1	2.66	5.17	0.23	-6.99	0.52	-1.82	0.58	0.01	0.01	0.01	0.01	0.01	0.02	5.18	0.23	-6.99	0.52	-1.81	0.58	-19.41	1.95	-2.49
	220	221	GLU	453	6.19	1.73	10.89	1.65	17.08	2.45	-1.61	0.74	-0.94	0.81	-2.55	1.18	45.82	3.14	5.71	1.11	51.53	3.42	50.4	3.4	15.66	1.89	66.06	3.94	-108.02	2.92	-12.91	0.81	-120.93	3.32	0.69	0.1	0.13	0.03	0.82	0.09	-107.33	2.94	-12.78	0.8	-120.11	3.32	-56.93	1.63	2.88
	221	222	LYS	454	10.78	1.93	10.52	1.44	21.3	2.5	-0.51	0.93	0.4	0.76	-0.11	1.39	-66.17	8.93	-7.87	1.21	-74.04	8.71	-55.9	9.1	3.05	1.51	-52.85	8.99	36.65	7.93	-5.29	0.78	31.36	7.53	0.89	0.07	0.2	0.03	1.1	0.06	37.54	7.88	-5.09	0.77	32.46	7.49	-18.36	2.32	-2.03
	222	223	ASP	455	4.54	1.69	11.07	1.6	15.61	2.49	-0.16	0.9	-0.87	0.71	-1.03	1.26	16.44	3.39	-1.9	1.89	14.54	3.98	20.83	4.04	8.3	2.27	29.13	4.85	-82.86	3.73	-15.75	1.35	-98.61	4.34	0.41	0.08	0.1	0.02	0.52	0.09	-82.45	3.68	-15.65	1.33	-98.09	4.29	-61.62	1.62	-7.34
	223	224	TYR	456	8.76	1.91	9.81	1.25	18.57	2.28	-1.87	0.82	-0.71	0.74	-2.58	1.21	-16.95	0.65	0.07	1.18	-16.88	1.29	-10.06	2.17	9.17	1.55	-0.89	2.72	-4.57	0.61	-4.59	0.62	-9.16	0.77	0.54	0.1	0.06	0.02	0.6	0.1	-4.03	0.55	-4.52	0.61	-8.55	0.73	-14.09	2.12	4.65
	224	225	ARG	457	13.49	2.9	10.33	1.27	23.82	3.07	-3.29	1.33	-0.93	0.67	-4.22	1.63	-254.15	5.72	1.01	0.69	-253.14	5.5	-243.95	5.82	10.4	1.38	-233.55	5.82	62.32	4.68	-8.5	0.65	53.82	4.46	0.33	0.06	0.14	0.03	0.47	0.07	62.65	4.68	-8.37	0.64	54.29	4.47	-181.29	2.76	2.03
	225	226	MET	458	7.11	1.86	9.79	1.29	16.9	2.56	-6.16	0.69	-0.62	0.86	-6.79	1.18	-2.92	0.45	-12.12	1.32	-15.03	1.32	-1.97	1.92	-2.95	1.55	-4.92	2.59	2.33	0.29	-5.48	0.97	-3.15	0.88	0.02	0.01	0.02	0.01	0.04	0.02	2.36	0.29	-5.47	0.96	-3.11	0.87	0.39	1.88	-8.41
	226	227	GLU	459	6.54	1.92	10.24	1.33	16.78	2.36	-0.75	0.71	-1.11	0.61	-1.86	1.07	33.83	5.03	1.79	1.08	35.61	4.85	39.62	5.67	10.92	1.53	50.54	5.74	-95.86	5.11	-6.54	0.86	-102.4	4.83	0.92	0.04	0.07	0.02	0.98	0.05	-94.94	5.09	-6.47	0.86	-101.41	4.81	-55.32	1.7	4.44
	227	228	ARG	460	13.91	2.5	12.22	1.49	26.13	3.06	-3.45	1.5	0.02	0.9	-3.43	1.89	-234.09	6.05	8.8	1.34	-225.28	6.2	-223.62	6.16	21.04	1.69	-202.58	6.32	47.09	5.14	-7.15	0.89	39.94	4.91	0.75	0.17	0.08	0.03	0.83	0.18	47.84	5.06	-7.07	0.89	40.77	4.84	-175.78	2.81	13.97
	228	229	PRO	461	12.2	1.39	13.38	1.27	25.57	2.18	-3.85	0.65	-1.86	0.79	-5.7	1.07	-12.29	0.73	3.7	1.99	-8.59	1.84	-3.94	1.62	15.22	2.56	11.28	3.01	11.56	0.7	-15.06	1.78	-3.5	1.63	0.01	0.01	0.06	0.02	0.07	0.02	11.57	0.7	-15	1.78	-3.43	1.63	7.63	1.44	0.22
	229	230	GLU	462	6.17	1.67	9.89	1.42	16.06	2.3	-0.19	0.81	-0.31	0.63	-0.5	1.07	31.94	10.92	1.76	1.59	33.7	11.11	37.92	10.42	11.34	2.03	49.27	10.41	-95.76	10.61	-12.52	1.37	-108.28	10.78	0.92	0.12	0.21	0.04	1.13	0.12	-94.84	10.52	-12.32	1.36	-107.16	10.7	-56.92	1.53	-0.97
	230	231	GLY	463	0	0	9.19	1.55	9.19	1.55	0	0	-1.82	0.65	-1.82	0.65	0	0	-9.88	1.31	-9.88	1.31	0	0	-2.51	2.01	-2.51	2.01	0	0	-2.38	1.07	-2.38	1.07	0	0	0.11	0.07	0.11	0.07	0	0	-2.27	1.04	-2.27	1.04	0	0	-4.78
	231	232	CYS	464	3.4	1.2	10.6	1.32	14	1.8	-3.15	0.57	0.24	0.85	-2.91	0.99	6.71	0.88	2.93	2.58	9.63	2.89	6.95	1.34	13.76	2.51	20.72	2.87	-2.01	0.46	-3.05	1.61	-5.06	1.66	0.02	0.01	0.04	0.03	0.06	0.03	-1.99	0.45	-3.01	1.6	-5	1.65	4.97	1.24	10.76
	232	233	PRO	465	11.99	1.51	12.66	1.09	24.65	1.92	-1.55	0.53	-0.94	0.84	-2.5	1.05	-9.14	0.99	1.48	1.32	-7.67	1.67	1.3	1.9	13.19	1.54	14.49	2.5	8.82	0.95	-12.59	0.98	-3.77	1.22	0.44	0.08	0.08	0.02	0.52	0.08	9.26	0.96	-12.51	0.97	-3.25	1.2	10.56	1.55	0.68
	233	234	GLU	466	6.39	2.1	11.03	1.73	17.42	2.8	-1.06	0.76	-0.64	1.13	-1.7	1.45	30.83	6.12	3.75	1.62	34.58	6.76	36.16	6.25	14.14	1.89	50.3	6.69	-93.85	5.95	-10.04	1.03	-103.89	6.31	0.69	0.1	0.05	0.03	0.74	0.09	-93.17	5.91	-9.99	1.02	-103.15	6.27	-57.01	2.07	4.15
	234	235	LYS	467	11.83	2.3	10.96	1.41	22.79	2.67	-1.67	0.93	-1.44	0.69	-3.12	1.21	-68.15	10.02	-1.17	1.29	-69.31	10.39	-57.98	10.14	8.34	1.68	-49.64	10.61	39.63	8.88	-6.24	0.96	33.39	9.09	0.73	0.09	0.03	0.03	0.76	0.09	40.36	8.84	-6.21	0.95	34.15	9.04	-17.63	2.64	2.14
	235	236	VAL	468	6.25	1.64	10.94	1.3	17.19	2.19	-2.34	0.67	-0.71	0.99	-3.05	1.19	-21.41	0.47	-10.41	1.07	-31.82	1.15	-17.51	1.84	-0.17	1.5	-17.68	2.4	6.12	0.31	-7.93	0.51	-1.81	0.56	0.03	0.02	0	0	0.03	0.02	6.16	0.32	-7.93	0.51	-1.77	0.56	-11.35	1.79	-8.1
	236	237	TYR	469	8.59	2.04	11.12	1.38	19.71	2.51	-4.59	0.87	-2.26	0.86	-6.85	1.17	-22.48	1.2	-11.78	0.94	-34.25	1.68	-18.48	2.16	-2.91	1.48	-21.39	2.69	-0.75	0.6	-2.05	0.63	-2.79	1.03	0.17	0.05	0	0	0.17	0.05	-0.58	0.6	-2.05	0.63	-2.62	1.04	-19.06	2.13	-4.96
	237	238	GLU	470	6.5	1.76	10.89	1.27	17.39	2.34	-1.59	1.02	-1.61	0.81	-3.2	1.27	28.77	12.2	-0.47	1.19	28.3	12.22	33.68	11.81	8.8	1.58	42.49	12.13	-91.2	11.74	-9.84	1.05	-101.04	11.86	0.57	0.13	0.04	0.02	0.61	0.13	-90.63	11.65	-9.8	1.05	-100.42	11.76	-56.94	1.72	-1
	238	239	LEU	471	9.1	2.05	11.56	1.46	20.66	2.62	-3.43	0.9	-1.77	0.85	-5.2	1.33	-28.84	0.38	-3.46	1.03	-32.29	1.05	-23.16	2.28	6.34	1.69	-16.83	2.91	4.98	0.23	-6.04	0.4	-1.06	0.4	0.06	0.04	0.01	0.01	0.08	0.04	5.04	0.22	-6.02	0.4	-0.98	0.4	-18.12	2.31	0.31
	239	240	MET	472	8.2	1.87	11.59	1.18	19.78	2.33	-7.56	0.79	-3.15	0.81	-10.71	1.06	-3.37	0.43	-1.12	0.97	-4.49	0.92	-2.74	1.89	7.32	1.36	4.58	2.55	3.27	0.23	-4.14	0.48	-0.87	0.48	0	0	0	0	0	0	3.27	0.23	-4.14	0.48	-0.87	0.48	0.54	1.91	3.18
	240	241	ARG	473	13.64	2.76	11.48	1.4	25.12	3.01	-3.01	1.11	-2.33	0.69	-5.34	1.38	-234.65	13.95	-6.75	1.76	-241.39	14.17	-224.01	13.31	2.4	1.95	-221.62	13.57	45.84	11.24	-3.89	1.14	41.95	11.42	0.82	0.09	0.02	0.02	0.84	0.09	46.66	11.19	-3.87	1.13	42.79	11.37	-177.35	3.2	-1.47
	241	242	ALA	474	2.68	0.76	10.89	1.22	13.57	1.57	-1.36	0.27	-2.5	0.63	-3.86	0.66	2.31	0.14	-13.21	0.85	-10.9	0.86	3.63	0.81	-4.82	1.41	-1.19	1.78	-0.2	0.07	-0.22	0.57	-0.41	0.58	0.2	0.04	0.04	0.02	0.23	0.04	0	0.08	-0.18	0.56	-0.18	0.57	3.63	0.83	-5
	242	243	CYS	475	3.3	0.96	10.57	1.25	13.87	1.72	-4.05	0.48	-3.55	0.69	-7.61	0.83	5.73	0.54	-9.57	0.84	-3.83	0.97	4.98	1.14	-2.55	1.38	2.43	2	-1.7	0.2	1.28	0.44	-0.42	0.49	0	0	0	0	0	0	-1.7	0.2	1.28	0.44	-0.42	0.49	3.28	1.11	-1.27
	243	244	TRP	476	11.28	2.21	10.55	1.43	21.83	2.66	-9.89	0.73	-1.59	0.96	-11.48	1.25	6.56	0.7	-9.73	2.46	-3.17	2.39	7.95	2.42	-0.77	2.32	7.19	3.07	0.88	0.38	-2.31	1.37	-1.43	1.44	0.03	0.01	0	0	0.04	0.01	0.91	0.38	-2.31	1.37	-1.4	1.44	8.86	2.39	-3.08
	244	245	GLN	477	13.95	1.95	10.13	1.23	24.08	2.21	-3.02	0.77	-1.42	0.91	-4.44	1.27	-71.09	4.17	-8.74	1.12	-79.83	4.08	-60.16	3.96	-0.02	1.58	-60.18	4.15	-4.3	2.88	-1.56	0.52	-5.86	2.79	0.5	0.06	0	0	0.5	0.06	-3.8	2.89	-1.55	0.52	-5.36	2.8	-63.96	1.84	-1.58
	245	246	TRP	478	11.13	2.05	11.74	1.06	22.87	2.43	-3.76	1.03	-2.12	0.67	-5.88	1.31	10.18	0.74	-6.85	1.43	3.32	1.68	17.55	2.36	2.76	1.45	20.31	3.07	-5.3	0.73	-3.56	0.71	-8.86	1.05	0.74	0.11	0.04	0.01	0.78	0.11	-4.56	0.69	-3.52	0.71	-8.08	1.03	12.99	2.18	-0.76
	246	247	ASN	479	11.17	1.9	11.98	1.12	23.14	2.15	-1.92	0.62	-0.35	0.9	-2.27	1.22	-81.82	2.53	1.96	1.56	-79.85	3.41	-72.56	2.85	13.59	1.72	-58.97	3.78	-4.89	2.11	-4.13	0.75	-9.02	2.57	0.54	0.04	0.04	0.01	0.59	0.05	-4.34	2.09	-4.09	0.75	-8.43	2.55	-76.91	1.6	9.51
	247	248	PRO	480	12.28	1.74	14.03	1.29	26.31	2.26	-2.85	0.55	-2.48	0.82	-5.33	0.9	-7.34	1.13	-1.43	1.92	-8.77	1.76	2.08	2.26	10.12	2.2	12.21	2.9	6.94	1.02	-9.93	1.05	-3	0.97	0.28	0.06	0	0	0.29	0.06	7.22	1.04	-9.93	1.05	-2.71	0.99	9.3	1.99	0.19
	248	249	SER	481	3.67	1.16	10.48	1.39	14.14	1.99	-0.71	0.29	-0.36	0.81	-1.07	0.94	-3.2	0.86	-5.84	0.94	-9.04	1.4	-0.25	1.44	4.28	1.55	4.03	2.41	-1.78	0.69	-9.2	0.76	-10.98	1.07	0.51	0.03	0.22	0.04	0.73	0.04	-1.27	0.69	-8.98	0.75	-10.25	1.05	-1.51	1.22	-4.71
	249	250	ASP	482	4.44	1.61	10.42	1.41	14.85	2.15	-1.22	0.72	-0.72	0.68	-1.94	0.98	30.11	6.04	10.78	1.09	40.89	6.37	33.32	5.79	20.48	1.59	53.8	6.42	-95.35	5.66	-17.06	1.01	-112.41	6.05	0.51	0.05	0.16	0.02	0.67	0.05	-94.84	5.63	-16.9	1	-111.74	6.02	-61.52	1.52	3.58
	250	251	ARG	483	12.94	2.84	11.79	1.51	24.72	3.41	-7.53	1.71	-0.27	0.93	-7.8	1.81	-251.5	3.84	2.96	1.98	-248.53	4.06	-246.09	4.78	14.47	2.26	-231.61	5.34	57.56	3.23	-2.33	1.21	55.23	3.31	0	0	0.02	0.02	0.02	0.02	57.56	3.23	-2.32	1.2	55.24	3.31	-188.53	2.96	12.16
	251	252	PRO	484	12.14	1.38	12.94	1.04	25.08	1.88	-3.24	0.61	-2.34	0.62	-5.58	0.72	-15.41	0.81	2.85	1.4	-12.56	1.13	-6.51	1.78	13.45	1.79	6.94	2.1	14.79	0.73	-13.27	1.07	1.51	0.77	0.14	0.03	0.03	0.02	0.17	0.04	14.93	0.74	-13.25	1.07	1.68	0.75	8.42	1.51	0.2
	252	253	SER	485	3.3	0.94	9.64	1.1	12.93	1.58	-0.78	0.96	-1.9	0.84	-2.68	1.28	-9.29	2.57	-9.13	1.31	-18.42	2.9	-6.78	2.19	-1.39	1.7	-8.17	2.88	2.47	1.38	-4.63	0.58	-2.16	1.65	0.15	0.03	0	0	0.15	0.03	2.62	1.37	-4.63	0.58	-2.01	1.64	-4.16	1.33	-6.02
	253	254	PHE	486	8.09	1.94	11.09	1.61	19.19	2.48	-5.93	0.61	-2.36	0.85	-8.29	1.05	-0.54	0.3	-10.27	1.07	-10.81	1.1	1.63	2.01	-1.54	1.67	0.09	2.69	1.01	0.22	-2.14	0.46	-1.12	0.53	0	0	0	0	0	0	1.02	0.22	-2.14	0.46	-1.12	0.53	2.65	2	-3.68
	254	255	ALA	487	2.74	0.66	11.21	1.29	13.95	1.56	-1.12	0.23	-2.34	0.59	-3.46	0.62	2.44	0.18	-9.61	1.48	-7.17	1.52	4.06	0.71	-0.74	1.68	3.32	1.97	-0.53	0.14	-1.86	0.91	-2.39	0.98	0.23	0.04	0.03	0.02	0.25	0.06	-0.3	0.17	-1.84	0.9	-2.14	0.97	3.76	0.7	-2.58
	255	256	GLU	488	6.41	1.8	10.89	1.14	17.3	2.28	-1.16	1.2	-1.79	0.78	-2.95	1.53	31.96	5.28	1.86	1.15	33.82	5.55	37.22	5.12	10.95	1.5	48.17	5.55	-95.08	4.5	-11.78	0.65	-106.86	4.82	0.63	0.04	0.04	0.02	0.67	0.06	-94.45	4.49	-11.74	0.65	-106.19	4.81	-57.23	2.1	-0.79
	256	257	ILE	489	9.55	2.01	11.52	1.38	21.08	2.53	-3.59	1.07	-1.13	0.92	-4.72	1.54	-8.13	0.29	-0.88	1.21	-9.01	1.21	-2.17	2.1	9.51	1.66	7.34	2.72	6.56	0.25	-8.45	0.58	-1.89	0.55	0	0	0	0	0.01	0.01	6.56	0.25	-8.45	0.58	-1.89	0.55	4.39	2.06	1.07
	257	258	HIS	490	25.2	1.81	10.79	1.16	35.99	2.14	-5.25	0.72	-2.44	0.78	-7.69	1.16	-9.72	2.8	-5.79	1.35	-15.51	3.06	10.23	3.72	2.56	1.68	12.8	4.06	-5.15	2.48	-7.06	1.27	-12.21	2.96	0.43	0.08	0.01	0.02	0.45	0.08	-4.72	2.45	-7.05	1.26	-11.77	2.94	5.51	2.08	-4.48
	258	259	GLN	491	14.13	2.22	10.62	1.28	24.75	2.81	-1.63	0.63	-1.06	0.81	-2.69	1.05	-66.36	1.84	-10.29	1.31	-76.65	2.04	-53.86	2.86	-0.73	1.58	-54.6	3.3	-7.92	1.74	-3.92	0.63	-11.84	1.6	0.77	0.07	0.01	0.01	0.78	0.07	-7.15	1.71	-3.91	0.63	-11.06	1.56	-61.02	1.91	-4.64
	259	260	ALA	492	2.79	0.89	11.14	1.34	13.93	1.87	-1.59	0.33	-1.87	0.95	-3.46	1.03	2.38	0.12	-9.79	1.36	-7.41	1.35	3.59	1.01	-0.53	1.9	3.06	2.42	-0.3	0.06	-0.66	0.64	-0.95	0.66	0.07	0.04	0.01	0.01	0.08	0.05	-0.23	0.07	-0.64	0.64	-0.87	0.66	3.36	1.01	-1.17
	260	261	PHE	493	8.52	2.24	10.71	1.32	19.23	2.9	-3.58	0.75	-1.58	0.54	-5.16	0.99	0.22	0.3	-7.07	1.19	-6.85	1.24	5.15	2.4	2.07	1.61	7.22	3.14	0.75	0.19	-5.57	1.09	-4.82	1.11	0.05	0.03	0.11	0.04	0.15	0.05	0.79	0.19	-5.46	1.1	-4.67	1.13	5.94	2.41	-3.39
	261	262	GLU	494	6.16	1.84	10.51	1.53	16.67	2.3	-1.39	0.57	0.17	0.79	-1.22	1.06	56.41	4.21	3.92	1.33	60.33	4.65	61.18	4.26	14.6	1.81	75.78	4.65	-118.69	4.16	-15.4	1.06	-134.09	4.49	0.74	0.07	0.24	0.03	0.97	0.07	-117.95	4.16	-15.16	1.08	-133.12	4.5	-56.77	1.64	-0.56
	262	263	THR	495	6.44	1.31	11.03	1.69	17.47	2.14	-0.72	0.7	0.47	0.74	-0.25	1.15	-29.06	1.17	-7.08	1.21	-36.14	1.5	-23.34	1.68	4.41	1.76	-18.93	2.33	3.77	0.82	-8.31	0.73	-4.54	1	0.45	0.05	0.28	0.02	0.73	0.05	4.22	0.8	-8.03	0.74	-3.81	0.98	-19.12	1.36	-3.62
	263	264	MET	496	7.39	2.02	9.96	1.27	17.35	2.45	-2.73	1.04	0.64	0.95	-2.09	1.64	-2.86	0.7	-4.25	3.4	-7.11	3.33	1.8	2.51	6.35	3.51	8.15	4.16	2.04	0.65	-2.77	2.64	-0.73	2.52	0.66	0.2	0.13	0.06	0.79	0.22	2.7	0.65	-2.64	2.6	0.06	2.43	4.5	2.35	3.71
	264	265	PHE	497	8.8	2.31	6.48	1.22	15.28	2.78	-2.84	0.93	0.13	0.59	-2.72	1.21	48.08	14.39	-3.68	5.33	44.4	9.18	54.04	13.86	2.92	5.65	56.96	8.68	-180.33	13.25	64.03	5.01	-116.3	8.3	0.65	0.1	0.04	0.03	0.69	0.11	-179.68	13.22	64.07	5.03	-115.61	8.25	-125.64	2.3	66.99
	265	266	LIG	498	26.6	3.48	0	0	26.6	3.48	1.1	1.45	0	0	1.1	1.45	-39.04	19.29	0	0	-39.04	19.29	-11.34	20.3	0	0	-11.34	20.3	-26.59	19.02	0	0	-26.59	19.02	2.58	0.16	0	0	2.58	0.16	-24.01	18.89	0	0	-24.01	18.89	-35.35	3.49	0
=>>	RECEPTOR
	Number	Residue	Residue Name	Residue ID	SINT		BINT		TINT		SVDW		BVDW		TVDW		SELE		BELE		TELE		SGAS		BGAS		TGAS		SGB		BGB		TGB		SGBSUR		BGBSUR		TGBSUR		SGBSOL		BGBSOL		TGBSOL		SGBTOT		BGBTOT
	0	1	ASP	233	5.12	1.45	3.88	0.88	9	1.98	-0.99	1.03	-0.23	0.52	-1.22	1.33	-64.87	6.36	-17.06	1.92	-81.92	6.9	-60.74	6.37	-13.4	1.99	-74.14	7	-56.73	6.07	-6.58	1.7	-63.31	6.43	0.96	0.06	0.14	0.04	1.1	0.08	-55.77	6.06	-6.44	1.72	-62.21	6.42	-116.52	1.79	-19.84
	1	2	LYS	234	11.45	2.49	10.5	1.37	21.95	2.87	-0.3	0.86	0	0.79	-0.29	1.37	10.27	4.3	-2.77	1.1	7.5	4.59	21.43	4.9	7.73	1.53	29.16	5.17	-37.5	4.26	-6.02	1.12	-43.52	4.59	1.17	0.12	0.27	0.04	1.44	0.12	-36.33	4.24	-5.75	1.1	-42.08	4.57	-14.9	2.52	1.98
	2	3	TRP	235	11.1	2.36	10.51	1.48	21.61	2.73	-5.81	0.79	-0.98	0.85	-6.79	1.22	10.73	1.44	-16.06	1.19	-5.33	1.88	16.02	2.6	-6.53	1.87	9.48	3.17	-5.82	1.16	-2.89	0.69	-8.71	1.37	0.43	0.11	0.03	0.02	0.46	0.11	-5.39	1.19	-2.86	0.69	-8.25	1.39	10.63	2.55	-9.39
	3	4	GLU	236	7.08	1.83	10.36	1.35	17.44	2.59	-2.69	1.19	-0.84	0.85	-3.53	1.5	-4.84	6.18	-5.15	1.75	-9.99	6.31	-0.45	6.19	4.37	1.99	3.92	6.25	-54.86	5.94	-7.21	1.3	-62.07	6.03	0.16	0.08	0.14	0.04	0.3	0.08	-54.7	5.9	-7.07	1.28	-61.77	6	-55.15	2.01	-2.7
	4	5	MET	237	7.2	1.52	10.24	1.41	17.44	2.04	-6.15	0.67	-0.78	0.78	-6.93	1.07	-1.88	0.47	-6.04	1.45	-7.92	1.45	-0.83	1.67	3.43	1.99	2.6	2.39	1.53	0.44	-5.18	1.11	-3.65	1.14	0.06	0.03	0.06	0.02	0.13	0.04	1.6	0.43	-5.11	1.1	-3.52	1.12	0.77	1.62	-1.68
	5	6	GLU	238	6.01	1.71	10.08	1.44	16.09	2.34	-1.14	0.68	-0.99	0.88	-2.13	1.19	9.72	6.61	4.68	1.54	14.4	7.02	14.59	6.51	13.77	1.96	28.36	6.97	-73.11	6.03	-7.35	0.92	-80.46	6.32	0.74	0.09	0.04	0.02	0.78	0.1	-72.37	6	-7.31	0.91	-79.68	6.29	-57.78	1.72	6.46
	6	7	ARG	239	14.45	3.05	10.96	1.37	25.4	3.26	-3.09	1.29	-0.99	0.62	-4.07	1.42	-222.18	5.28	-3.66	1.03	-225.84	5.5	-210.83	5.24	6.31	1.72	-204.51	5.63	32.23	4.27	-6.02	0.87	26.21	4.57	0.42	0.04	0.13	0.04	0.55	0.06	32.65	4.28	-5.89	0.85	26.76	4.57	-178.18	2.83	0.42
	7	8	THR	240	6.69	1.27	10.63	1.36	17.32	1.98	-0.12	0.61	1.05	0.87	0.93	1.17	-21.95	2.43	-22.98	1.97	-44.92	3.29	-15.38	2.51	-11.31	2.07	-26.68	3.46	-2.55	1.63	0.24	1.4	-2.31	2.16	0.72	0.04	0.09	0.03	0.81	0.05	-1.83	1.61	0.33	1.38	-1.5	2.13	-17.21	1.52	-10.97
	8	9	ASP	241	4.47	1.42	10.31	1.46	14.78	1.99	-2.75	0.62	-0.85	0.96	-3.59	1.08	-10.6	7.23	-8.3	1.25	-18.91	7.58	-8.88	7.69	1.16	1.72	-7.72	7.97	-49.49	8.19	-3.55	0.94	-53.05	8.16	0.24	0.07	0.02	0.01	0.26	0.07	-49.25	8.14	-3.54	0.94	-52.79	8.11	-58.13	1.82	-2.37
	9	10	ILE	242	9.46	1.92	10.42	1.43	19.88	2.48	-3.92	0.95	-0.69	0.85	-4.61	1.43	-5.01	0.36	-5.52	1.26	-10.53	1.23	0.53	1.97	4.21	1.86	4.74	2.6	2.91	0.3	-5.48	1.04	-2.57	0.98	0.02	0.01	0.04	0.02	0.05	0.03	2.92	0.3	-5.45	1.03	-2.52	0.98	3.45	1.98	-1.24
	10	11	THR	243	6.37	1.66	10.42	1.29	16.78	2.32	-1.39	0.61	-0.19	0.86	-1.58	1.08	-20.32	1.62	-13.03	1.2	-33.35	1.64	-15.34	2.11	-2.8	1.81	-18.15	2.79	-3.19	1.28	-2.67	0.65	-5.86	1.24	0.42	0.05	0.04	0.01	0.46	0.05	-2.77	1.29	-2.63	0.65	-5.4	1.26	-18.11	1.72	-5.43
	11	12	MET	244	7.73	2.07	10.29	1.32	18.02	2.65	-4.7	0.77	-0.87	0.64	-5.57	1.02	-0.25	0.62	3.03	1.02	2.79	1.08	2.79	2.23	12.45	1.52	15.24	2.71	0.05	0.5	-6.11	0.73	-6.07	0.81	0.27	0.07	0.2	0.02	0.47	0.06	0.32	0.48	-5.91	0.73	-5.6	0.79	3.11	2.15	6.53
	12	13	LYS	245	10.73	2.42	12.71	1.33	23.45	2.58	-2.15	0.94	-0.55	0.78	-2.7	1.17	-39.81	10.79	-3.68	1.01	-43.49	10.56	-31.23	11.08	8.49	1.51	-22.75	10.67	11.87	9.66	-5.38	0.71	6.49	9.45	0.61	0.1	0.27	0.03	0.88	0.1	12.48	9.58	-5.1	0.69	7.38	9.37	-18.75	3.02	3.38
	13	14	HIS	246	25.08	1.76	10.03	1.29	35.11	2.28	-3.37	0.8	-0.5	0.88	-3.87	1.35	-15.73	2.08	-4.52	0.86	-20.26	2.17	5.97	2.46	5.01	1.58	10.98	2.9	-1.08	1.52	-4.8	0.56	-5.88	1.57	0.62	0.06	0.06	0.02	0.68	0.06	-0.46	1.49	-4.74	0.55	-5.2	1.54	5.51	1.77	0.26
	14	15	LYS	247	10.96	2.35	10.18	1.19	21.15	2.63	-2.15	1.15	-1.58	0.81	-3.73	1.64	-38.98	17.1	-3.09	1.59	-42.08	18.24	-30.17	17.92	5.51	2.08	-24.66	19.28	10.28	15.63	-3.86	1.22	6.42	16.53	0.66	0.18	0.07	0.04	0.73	0.21	10.94	15.46	-3.79	1.19	7.15	16.33	-19.23	3.4	1.72
	15	16	LEU	248	8.74	2.04	10.09	1.67	18.83	2.78	-3.23	0.89	-1.55	0.97	-4.78	1.34	-26.89	0.4	-7.48	1.73	-34.37	1.82	-21.38	2.11	1.06	2.45	-20.31	3.43	3.35	0.27	-4.47	0.91	-1.12	0.96	0.12	0.06	0	0.01	0.13	0.07	3.47	0.25	-4.47	0.9	-0.99	0.91	-17.9	2.13	-3.4
	16	17	GLY	249	0	0	9.05	1.53	9.05	1.53	0	0	-1.4	0.75	-1.4	0.75	0	0	-7.76	2.22	-7.76	2.22	0	0	-0.11	2.23	-0.11	2.23	0	0	-5.84	1.57	-5.84	1.57	0	0	0.31	0.1	0.31	0.1	0	0	-5.52	1.51	-5.52	1.51	0	0	-5.63
	17	18	GLY	250	0	0	8.33	1.62	8.33	1.62	0	0	-0.43	0.65	-0.43	0.65	0	0	-5.31	1.98	-5.31	1.98	0	0	2.58	2.48	2.58	2.48	0	0	-7.35	1.71	-7.35	1.71	0	0	0.59	0.05	0.59	0.05	0	0	-6.76	1.69	-6.76	1.69	0	0	-4.18
	18	19	GLY	251	0	0	9.25	1.34	9.25	1.34	0	0	-1.43	0.77	-1.43	0.77	0	0	-7.08	2.09	-7.08	2.09	0	0	0.74	2.37	0.74	2.37	0	0	-4.54	1.58	-4.54	1.58	0	0	0.23	0.06	0.23	0.06	0	0	-4.31	1.54	-4.31	1.54	0	0	-3.58
	19	20	GLN	252	13.86	1.92	10.37	1.65	24.24	2.61	-1.94	0.89	-0.71	0.61	-2.64	1.12	-66.18	3.02	-3.4	1.32	-69.58	3.2	-54.25	3.08	6.27	1.89	-47.98	3.42	-7.93	2.27	-6.63	0.99	-14.57	2.28	0.56	0.12	0.12	0.06	0.69	0.1	-7.37	2.2	-6.51	0.98	-13.88	2.25	-61.63	1.94	-0.24
	20	21	TYR	253	8.65	1.89	8.94	1.36	17.59	2.43	-3.63	0.8	-0.79	0.89	-4.42	1.29	-18.97	1.03	-2.27	0.97	-21.24	1.54	-13.95	2.2	5.88	1.47	-8.07	2.71	-2.49	0.49	-5.28	0.68	-7.77	0.88	0.07	0.03	0.01	0.01	0.08	0.03	-2.42	0.49	-5.27	0.68	-7.69	0.88	-16.37	2.16	0.61
	21	22	GLY	254	0	0	8.76	1.51	8.76	1.51	0	0	-2	0.76	-2	0.76	0	0	-11.2	1.43	-11.2	1.43	0	0	-4.44	1.9	-4.44	1.9	0	0	-1.59	0.94	-1.59	0.94	0	0	0.09	0.04	0.09	0.04	0	0	-1.5	0.93	-1.5	0.93	0	0	-5.94
	22	23	GLU	255	6.48	1.72	10.9	1.41	17.38	2.26	-0.93	1.14	-0.99	0.77	-1.93	1.52	-13.24	10.95	-4.14	1.56	-17.38	11.03	-7.69	10.59	5.76	1.82	-1.93	10.97	-49.96	9.94	-6.92	0.93	-56.88	10.02	0.4	0.11	0.04	0.02	0.44	0.12	-49.56	9.89	-6.88	0.93	-56.44	9.97	-57.25	1.8	-1.12
	23	24	VAL	256	6.13	1.7	9.96	1.21	16.08	2.29	-2.97	0.77	-0.88	1.04	-3.86	1.45	-20.06	0.45	-9.35	1.14	-29.41	1.11	-16.91	1.77	-0.28	1.49	-17.18	2.23	4.87	0.4	-5.07	0.69	-0.2	0.47	0.04	0.01	0	0	0.04	0.01	4.9	0.4	-5.07	0.69	-0.16	0.47	-12	1.71	-5.34
	24	25	TYR	257	8.37	1.68	10.35	1.23	18.73	2.19	-3.77	0.73	-2.42	0.86	-6.19	1.13	-18.09	1.27	-11.25	0.94	-29.34	1.58	-13.48	2.26	-3.32	1.3	-16.8	2.74	-3.78	0.82	-2.64	0.33	-6.42	0.86	0.36	0.08	0	0	0.36	0.08	-3.42	0.79	-2.64	0.33	-6.06	0.84	-16.9	1.99	-5.96
	25	26	GLU	258	6.32	1.72	9.29	1.09	15.6	2.03	-3.47	1.07	-2.11	0.92	-5.57	1.44	0.39	8.82	-8.08	1.03	-7.69	8.87	3.24	8.85	-0.9	1.62	2.34	8.82	-61.03	8.3	-3.13	0.53	-64.15	8.31	0.15	0.04	0	0	0.15	0.04	-60.88	8.27	-3.13	0.53	-64.01	8.27	-57.64	1.89	-4.03
	26	27	GLY	259	0	0	8.12	1.27	8.12	1.27	0	0	-3.06	0.91	-3.06	0.91	0	0	-7.85	1.22	-7.85	1.22	0	0	-2.79	1.69	-2.79	1.69	0	0	-2.71	0.91	-2.71	0.91	0	0	0	0	0	0	0	0	-2.71	0.91	-2.71	0.91	0	0	-5.49
	27	28	VAL	260	6.11	1.7	9.69	1.09	15.8	2.12	-1.71	0.72	-1.47	0.82	-3.18	1.16	-17.9	0.54	-11.5	0.94	-29.4	0.97	-13.51	2.02	-3.28	1.39	-16.78	2.36	2.64	0.42	-2.95	0.64	-0.31	0.57	0.25	0.04	0	0	0.25	0.04	2.89	0.42	-2.95	0.64	-0.06	0.56	-10.61	1.94	-6.23
	28	29	TRP	261	11.31	1.96	11.44	1.28	22.75	2.29	-6.33	0.81	-2.85	0.93	-9.18	1.38	4	2.38	-5.38	1.27	-1.38	2.91	8.97	3.04	3.22	1.82	12.19	3.78	0.07	1.42	-0.97	0.45	-0.89	1.6	0.3	0.07	0	0	0.3	0.07	0.37	1.41	-0.97	0.45	-0.6	1.59	9.34	2.23	2.25
	29	30	LYS	262	10.89	2.47	12.21	1.46	23.1	2.99	-2.26	0.88	-1.07	0.84	-3.33	1.35	-22.26	4.83	0.26	1.47	-22	4.84	-13.63	5.29	11.41	1.8	-2.23	5.41	-4.12	4.74	-4.21	0.85	-8.33	4.78	0.73	0.06	0.13	0.03	0.86	0.07	-3.39	4.7	-4.08	0.83	-7.47	4.74	-17.02	2.65	7.32
	30	31	LYS	263	10.7	2.15	11.5	1.72	22.19	2.81	-2	0.8	-0.48	0.71	-2.48	1.18	-12.24	5.05	-9.11	1.56	-21.35	5.64	-3.55	5.66	1.92	2.28	-1.63	6.18	-15.03	4.86	-4.53	0.9	-19.56	5.2	0.82	0.06	0.26	0.02	1.08	0.07	-14.21	4.84	-4.27	0.89	-18.48	5.17	-17.76	2.5	-2.36
	31	32	TYR	264	8.44	2.3	9.71	1.52	18.15	2.85	-0.26	0.63	0.19	0.79	-0.07	1	-17.95	0.78	-8.62	0.88	-26.56	1.21	-9.77	2.58	1.29	1.5	-8.49	3.2	-4.59	0.64	-5.97	0.69	-10.56	0.94	0.83	0.06	0.19	0.03	1.02	0.07	-3.76	0.62	-5.77	0.68	-9.54	0.9	-13.53	2.38	-4.49
	32	33	SER	265	3.52	1.18	10.54	1.51	14.06	1.98	-0.09	0.4	-0.18	0.64	-0.27	0.81	-2.75	1.09	-3.76	1.44	-6.51	2.14	0.68	1.53	6.59	2.07	7.27	2.86	-2.85	0.91	-7.4	0.9	-10.25	1.36	0.55	0.03	0.16	0.03	0.71	0.05	-2.3	0.91	-7.23	0.89	-9.54	1.35	-1.62	1.24	-0.64
	33	34	LEU	266	8.79	1.82	10.76	1.53	19.55	2.45	-1.06	0.71	-0.72	0.85	-1.78	1.21	-26.25	0.33	-6.36	0.92	-32.61	1.02	-18.52	2.05	3.67	1.69	-14.85	2.77	2.26	0.25	-3.01	0.44	-0.74	0.46	0.57	0.06	0.03	0.01	0.6	0.06	2.83	0.25	-2.98	0.44	-0.15	0.46	-15.68	1.99	0.69
	34	35	THR	267	6.48	1.73	10.27	1.06	16.75	2.14	-2.2	0.57	-1.68	0.58	-3.87	0.87	-23.77	1.65	-8.02	0.71	-31.8	1.73	-19.49	2.15	0.57	1.19	-18.92	2.66	-0.07	0.89	-5.43	0.47	-5.5	0.85	0.31	0.05	0.04	0.02	0.34	0.05	0.23	0.88	-5.39	0.46	-5.16	0.85	-19.25	1.78	-4.82
	35	36	VAL	268	5.87	1.43	9.64	1.07	15.51	1.75	-3.83	0.81	-1.48	0.88	-5.32	1.28	-19.83	0.46	-9.25	1.04	-29.08	1.09	-17.79	1.6	-1.1	1.33	-18.88	2.07	4.5	0.32	-5.07	0.63	-0.56	0.48	0	0	0	0	0	0	4.5	0.32	-5.07	0.63	-0.56	0.48	-13.29	1.55	-6.16
	36	37	ALA	269	2.47	0.77	9.96	1.25	12.44	1.63	-1.86	0.37	-2.6	0.89	-4.47	0.97	2.19	0.11	-7.4	0.83	-5.21	0.82	2.8	0.84	-0.04	1.22	2.76	1.72	-0.14	0.05	-0.59	0.31	-0.73	0.31	0.02	0.01	0	0	0.02	0.01	-0.12	0.05	-0.59	0.31	-0.71	0.31	2.68	0.84	-0.63
	37	38	VAL	270	6	1.58	10.49	1.14	16.49	1.98	-3.58	0.7	-1.4	0.98	-4.98	1.27	-19.65	0.46	-3.82	0.86	-23.47	0.88	-17.23	1.77	5.27	1.29	-11.96	2.03	4.19	0.34	-4.79	0.5	-0.59	0.36	0	0	0	0	0	0	4.2	0.34	-4.79	0.5	-0.59	0.36	-13.03	1.72	0.48
	38	39	LYS	271	11.77	2.57	10.64	1.38	22.41	2.91	-3.79	1.07	-2.3	0.85	-6.09	1.37	-69.36	11.93	-9.07	0.88	-78.43	11.84	-61.37	12	-0.73	1.57	-62.1	12.1	44.51	10.08	-1.35	0.41	43.16	10.07	0.12	0.05	0	0	0.12	0.05	44.64	10.05	-1.35	0.41	43.29	10.04	-16.74	3.34	-2.08
	39	40	THR	272	6.26	1.56	9.94	1.22	16.19	2.09	-2.32	0.76	-0.98	0.8	-3.31	1.1	-25.61	1.45	-7.36	0.87	-32.97	1.93	-21.68	2.15	1.59	1.49	-20.08	2.83	1.19	1.24	-7.92	0.77	-6.73	1.68	0.04	0.03	0.09	0.03	0.13	0.04	1.23	1.23	-7.83	0.76	-6.6	1.65	-20.45	1.69	-6.23
	40	41	LEU	273	8.85	2.24	11.16	1.3	20.01	2.7	-2.44	0.92	-0.51	0.86	-2.94	1.36	-28.83	0.46	12.37	1.66	-16.46	1.82	-22.42	2.5	23.02	1.91	0.61	3.18	4.79	0.29	-12.41	1.05	-7.62	1.08	0.17	0.06	0.12	0.02	0.3	0.06	4.97	0.31	-12.29	1.04	-7.32	1.09	-17.45	2.45	10.74
	41	42	LYS	274	11.05	2.78	10.85	1.8	21.9	3.36	-0.21	1.09	0.19	0.69	-0.02	1.34	-44.3	8.56	-3.21	1.93	-47.51	8.91	-33.47	9.12	7.84	2.31	-25.63	9.41	15.82	7.73	-10.3	1.48	5.52	7.95	0.8	0.21	0.28	0.05	1.08	0.18	16.62	7.67	-10.02	1.47	6.6	7.92	-16.85	3.21	-2.19
	42	43	GLU	275	6.31	1.79	9.42	1.27	15.74	2.36	-2.69	0.83	-0.44	0.68	-3.13	1.16	56.23	6.11	-9.9	0.97	46.33	5.97	59.86	5.93	-0.92	1.47	58.94	5.9	-117.26	5.11	-5.83	0.75	-123.09	5.08	0.44	0.05	0.05	0.02	0.5	0.05	-116.82	5.13	-5.78	0.75	-122.6	5.1	-56.97	1.96	-6.69
	43	44	ASP	276	4.29	1.68	10.23	1.5	14.52	2.35	-1.23	0.89	-0.44	0.81	-1.67	1.36	43.24	4.05	-0.15	1.5	43.09	4.45	46.3	4.18	9.64	1.83	55.94	4.5	-107	3.53	-12.44	1.23	-119.44	3.88	0.5	0.05	0.09	0.03	0.58	0.06	-106.5	3.52	-12.35	1.22	-118.85	3.86	-60.2	1.56	-2.71
	44	45	THR	277	6.34	1.44	10.05	1.25	16.39	2.1	-0.06	0.85	0.07	0.88	0.01	1.36	-28.8	4.57	-3.09	1.67	-31.89	5.42	-22.53	4.3	7.03	1.89	-15.5	5.07	2.72	2.91	-10.96	1.16	-8.24	3.56	0.59	0.06	0.04	0.01	0.63	0.07	3.31	2.91	-10.92	1.16	-7.61	3.56	-19.22	2.05	-3.89
	45	46	MET	278	7.1	1.85	14.11	1.66	21.2	2.71	-0.87	0.48	-1	0.77	-1.87	1.09	-3.59	1.24	-3.43	1.35	-7.02	1.78	2.64	2.32	9.68	2.05	12.32	3.33	2.38	1.14	-8.73	1.28	-6.35	1.52	1.04	0.06	0.18	0.08	1.22	0.11	3.42	1.12	-8.55	1.24	-5.13	1.49	6.05	1.92	1.13
	46	47	GLU	279	6.39	1.93	10.81	1.48	17.19	2.54	-0.79	0.95	0.13	0.83	-0.66	1.49	57.38	4.13	2.04	3.04	59.42	5.42	62.97	4.32	12.98	3.49	75.95	5.82	-119.68	4.24	-12.78	2.01	-132.46	5.15	0.79	0.13	0.1	0.06	0.89	0.17	-118.89	4.23	-12.68	1.96	-131.57	5.07	-55.92	1.92	0.3
	47	48	VAL	280	6.7	1.82	10.98	1.39	17.68	2.27	-2.61	0.75	-0.15	0.85	-2.76	1.22	-23.22	0.59	-8.85	1.48	-32.07	1.5	-19.13	1.94	1.98	2.08	-17.15	2.83	8.05	0.45	-7.99	1.02	0.06	1.03	0.11	0.05	0	0	0.12	0.05	8.16	0.43	-7.99	1.02	0.18	1.01	-10.97	1.91	-6
	48	49	GLU	281	6.42	1.9	10.75	1.28	17.17	2.4	-0.85	0.6	-0.62	0.69	-1.47	0.97	39.94	4.27	-6.57	1.29	33.37	4.44	45.51	4.29	3.56	1.92	49.08	4.73	-102.8	4.29	-8.04	1.12	-110.83	4.27	0.89	0.07	0.05	0.03	0.94	0.07	-101.91	4.3	-7.99	1.12	-109.9	4.28	-56.39	1.6	-4.42
	49	50	GLU	282	6.33	1.8	10.92	1.54	17.25	2.26	0.21	1.1	-0.87	0.78	-0.67	1.53	18.56	8.92	-1.24	1.7	17.31	8.99	25.09	8.36	8.8	2.05	33.89	8.35	-83.42	8.11	-9.57	1.35	-92.99	8.17	0.69	0.08	0.05	0.02	0.74	0.09	-82.73	8.13	-9.52	1.34	-92.25	8.18	-57.64	1.92	-0.72
	50	51	PHE	283	8.16	2.04	11	1.14	19.16	2.44	-3.63	0.74	-2.21	0.65	-5.84	0.99	0.82	0.29	-6.82	1.21	-6	1.36	5.34	2.3	1.97	1.47	7.31	2.98	-0.29	0.28	-1.24	0.72	-1.53	0.85	0.17	0.04	0.03	0.02	0.2	0.04	-0.12	0.27	-1.21	0.71	-1.33	0.84	5.22	2.29	0.76
	51	52	LEU	284	8.97	1.94	11.38	1.62	20.35	2.57	-2.24	0.88	-1.48	0.72	-3.71	1.12	-27.93	0.61	0.78	0.93	-27.15	1.08	-21.21	2.12	10.69	1.59	-10.52	2.66	4.33	0.5	-3.95	0.82	0.38	0.81	0.34	0.08	0.06	0.02	0.4	0.08	4.67	0.47	-3.89	0.81	0.78	0.8	-16.54	2.06	6.8
	52	53	LYS	285	11.42	2.17	11.33	1.44	22.75	2.69	-1.09	0.71	-0.99	0.74	-2.08	1.06	-33.26	5.18	-13.73	1.79	-46.99	4.99	-22.93	5.69	-3.39	1.79	-26.32	5.63	5.85	5.23	0.1	1.16	5.95	5.01	1.12	0.08	0.04	0.03	1.15	0.1	6.97	5.2	0.13	1.14	7.1	4.97	-15.96	2.16	-3.26
	53	54	GLU	286	6.37	1.75	11.13	1.25	17.49	2.12	-2.78	0.67	-1.24	1.09	-4.02	1.14	33.68	8.73	-13.44	1.43	20.24	8.98	37.27	8.91	-3.56	1.74	33.71	9.35	-93.14	8.6	-4.81	0.78	-97.95	8.99	0.36	0.1	0.02	0.01	0.38	0.1	-92.78	8.52	-4.79	0.78	-97.57	8.91	-55.51	1.82	-8.35
	54	55	ALA	287	2.73	0.8	10.98	1.22	13.71	1.5	-1.69	0.36	-2.2	0.77	-3.9	0.9	2.13	0.14	-10.62	1.17	-8.49	1.19	3.17	0.92	-1.85	1.65	1.33	1.94	-0.19	0.08	1.41	0.67	1.22	0.69	0.01	0.01	0	0.01	0.01	0.01	-0.18	0.08	1.41	0.66	1.23	0.69	2.99	0.93	-0.43
	55	56	ALA	288	2.82	0.9	11.1	1.48	13.93	1.86	-0.94	0.23	-1.78	0.7	-2.72	0.74	2.25	0.15	-4.4	1.24	-2.15	1.23	4.13	0.96	4.92	1.74	9.06	2.03	-0.24	0.12	-2.22	1.24	-2.46	1.21	0.32	0.05	0.06	0.03	0.38	0.06	0.08	0.15	-2.16	1.22	-2.08	1.2	4.21	0.97	2.76
	56	57	VAL	289	6.31	1.82	11.11	1.14	17.42	2.27	-0.84	0.79	-0.19	0.99	-1.03	1.37	-20.27	0.82	-9.12	1.5	-29.39	1.28	-14.79	2.19	1.79	1.73	-13	2.63	5.16	0.64	-5.08	0.95	0.08	0.81	0.4	0.07	0.02	0.02	0.41	0.08	5.55	0.66	-5.06	0.95	0.5	0.79	-9.24	2.01	-3.26
	57	58	MET	290	7.13	1.81	10.71	1.18	17.84	2.43	-4.67	0.64	-1.8	0.86	-6.46	1.17	-2.48	0.93	-0.19	1.03	-2.67	1.09	-0.02	2.07	8.73	1.65	8.71	2.67	1.95	0.89	-5.18	0.74	-3.23	0.85	0.14	0.05	0.01	0.01	0.15	0.05	2.09	0.9	-5.17	0.73	-3.08	0.85	2.07	1.94	3.56
	58	59	LYS	291	11.01	2.06	10.41	1.34	21.42	2.4	-4.11	0.85	-1.08	0.63	-5.19	1.13	-30.22	7.52	-11.97	1.92	-42.19	7.21	-23.32	8.07	-2.63	2.4	-25.96	7.7	5.54	7.21	-0.94	1.38	4.59	6.85	0.39	0.08	0.07	0.03	0.46	0.09	5.92	7.16	-0.87	1.38	5.05	6.8	-17.4	2.47	-3.5
	59	60	GLU	292	6.24	1.82	10.9	1.43	17.14	2.21	-0.85	0.83	-0.2	0.83	-1.05	1.23	5.94	9.11	-11.47	2.05	-5.53	9.97	11.33	8.67	-0.77	2.51	10.56	9.7	-69.66	8.67	-4.44	1.85	-74.1	9.6	0.74	0.11	0.14	0.05	0.88	0.13	-68.92	8.6	-4.3	1.81	-73.21	9.5	-57.58	1.74	-5.06
	60	61	ILE	293	10.04	2.09	10.85	1.51	20.89	2.79	-2.6	1.08	-0.25	0.86	-2.84	1.61	-6.01	0.37	4.85	0.99	-1.17	1.01	1.43	2.3	15.45	1.49	16.89	2.87	3.71	0.33	-8.66	0.82	-4.95	0.82	0.07	0.06	0.03	0.02	0.1	0.06	3.78	0.33	-8.63	0.82	-4.85	0.81	5.21	2.29	6.83
	61	62	LYS	294	11.26	2.43	10.24	1.28	21.49	2.88	-0.65	0.75	-1.07	0.73	-1.73	1.19	-8.53	8.23	-2.28	1.19	-10.81	8.07	2.07	8.67	6.88	1.69	8.96	8.59	-18.06	8.4	-3.38	1.02	-21.43	8.17	1	0.17	0.08	0.03	1.09	0.16	-17.05	8.36	-3.3	1	-20.35	8.14	-14.98	2.47	3.59
	62	63	HIS	295	24.83	1.64	11.09	1.28	35.92	2.02	-6.44	0.74	-0.43	0.69	-6.87	1.08	-14.38	1.52	-0.13	0.94	-14.51	1.84	4.01	2.29	10.53	1.62	14.54	2.85	-0.62	1.26	-4.67	0.69	-5.29	1.49	0.21	0.04	0.07	0.02	0.27	0.05	-0.41	1.23	-4.6	0.69	-5.01	1.47	3.6	1.84	5.93
	63	64	PRO	296	11.95	1.43	14.03	1.19	25.98	2.04	-1.01	0.53	-1.32	0.56	-2.33	0.73	-8.15	0.92	-0.52	1.08	-8.67	0.92	2.79	1.78	12.19	1.37	14.97	2.15	7.47	0.88	-10.25	1	-2.79	0.83	0.69	0.03	0.11	0.03	0.8	0.03	8.16	0.88	-10.14	0.99	-1.99	0.81	10.94	1.5	2.04
	64	65	ASN	297	11.48	1.57	10.65	1.43	22.13	2.25	-4.07	0.6	-1.46	0.87	-5.53	1	-81.87	1.22	-7.52	1.07	-89.39	1.56	-74.46	1.68	1.67	1.5	-72.79	2.19	-3.88	0.78	-1.06	0.31	-4.94	0.8	0.14	0.02	0	0	0.14	0.02	-3.74	0.77	-1.06	0.31	-4.8	0.8	-78.2	1.49	0.61
	65	66	LEU	298	8.97	1.83	10.53	1.43	19.5	2.27	-3.12	0.88	-1.76	0.93	-4.88	1.29	-27.67	0.45	-1.35	1.28	-29.02	1.23	-21.82	1.98	7.41	1.96	-14.4	2.69	3.77	0.29	-4.93	0.75	-1.17	0.65	0.08	0.03	0	0	0.09	0.03	3.85	0.3	-4.93	0.75	-1.08	0.65	-17.96	1.91	2.48
	66	67	VAL	299	6.66	1.65	10.69	1.36	17.35	2.32	-3.47	0.6	-1.25	0.8	-4.72	1.17	-21.45	0.5	-7.47	1.11	-28.93	1.19	-18.26	1.85	1.96	1.54	-16.3	2.34	6.07	0.36	-8.53	0.77	-2.46	0.64	0.05	0.02	0.04	0.02	0.08	0.03	6.12	0.36	-8.49	0.77	-2.38	0.64	-12.14	1.77	-6.53
	67	68	GLN	300	13.56	1.99	10.63	1.17	24.19	2.42	-2.1	0.61	-1.72	0.78	-3.83	1.11	-67.54	5.63	-4.96	1.16	-72.5	6.02	-56.08	5.54	3.94	1.43	-52.14	5.92	-6.72	4.43	-4.41	0.63	-11.13	4.65	0.62	0.09	0.02	0.02	0.64	0.1	-6.1	4.42	-4.39	0.63	-10.49	4.64	-62.18	1.94	-0.45
	68	69	LEU	301	8.82	1.55	10.64	1.16	19.46	2.07	-3.59	1.08	-1.61	0.61	-5.19	1.26	-26.9	0.49	0.73	1.25	-26.17	1.12	-21.67	1.79	9.76	1.88	-11.91	2.57	2.92	0.37	-5.33	1.2	-2.41	1.03	0.04	0.03	0.07	0.03	0.11	0.05	2.95	0.36	-5.26	1.18	-2.31	1.01	-18.72	1.79	4.5
	69	70	LEU	302	9.02	1.91	10.27	1.33	19.29	2.47	-2.9	0.96	-1.3	0.68	-4.2	1.27	-26.34	0.46	-3.13	0.94	-29.47	0.89	-20.22	2.12	5.84	1.67	-14.38	2.68	2.83	0.3	-5.84	0.69	-3.01	0.55	0.16	0.05	0.1	0.03	0.27	0.06	2.99	0.32	-5.74	0.67	-2.75	0.54	-17.23	2.12	0.1
	70	71	GLY	303	0	0	7.75	1.24	7.75	1.24	0	0	-3.26	0.83	-3.26	0.83	0	0	-11.12	0.81	-11.12	0.81	0	0	-6.62	1.23	-6.62	1.23	0	0	-0.7	0.38	-0.7	0.38	0	0	0	0	0	0	0	0	-0.69	0.38	-0.69	0.38	0	0	-7.32
	71	72	VAL	304	6.2	1.81	9.54	1.24	15.74	2.31	-3.06	0.81	-1.65	0.93	-4.72	1.22	-19.88	0.63	-9.91	1.22	-29.79	1.07	-16.74	1.95	-2.02	1.68	-18.76	2.48	4.46	0.48	-5.4	0.8	-0.94	0.56	0	0	0	0	0	0	4.46	0.48	-5.4	0.8	-0.94	0.56	-12.28	1.89	-7.42
	72	73	CYS	305	3.11	0.97	10.77	1.12	13.88	1.68	-3.83	0.46	-2.54	0.77	-6.37	0.92	4.69	0.6	-11.26	1.12	-6.56	1.37	3.97	1.14	-3.03	1.56	0.94	2.17	-0.29	0.35	1.39	0.62	1.1	0.73	0	0	0	0	0.01	0.01	-0.29	0.35	1.39	0.62	1.1	0.73	3.68	1.09	-1.64
	73	74	THR	306	6.29	1.36	11.21	1.38	17.5	2.17	-1.39	0.96	-0.66	0.86	-2.05	1.38	-29.34	1.67	-3.01	1.12	-32.35	1.97	-24.44	1.92	7.54	1.53	-16.9	2.48	2.99	0.92	-6.42	0.69	-3.43	1.24	0.14	0.04	0.09	0.03	0.23	0.05	3.13	0.9	-6.33	0.69	-3.2	1.22	-21.32	1.75	1.22
	74	75	ARG	307	13.31	2.76	11.33	1.59	24.64	3.17	-1.01	1.22	-0.44	0.78	-1.46	1.33	-217.97	9.41	-6.73	1.57	-224.71	9.02	-205.68	9.61	4.15	1.96	-201.53	9.37	26.96	7.81	-6.41	0.89	20.55	7.56	1.06	0.16	0.25	0.02	1.31	0.15	28.02	7.7	-6.16	0.88	21.86	7.46	-177.67	3.29	-2.01
	75	76	GLU	308	6.78	1.92	11.12	1.29	17.91	2.44	-1.08	1.12	0.45	1.07	-0.64	1.71	-10.94	6.57	-2.87	1.6	-13.81	7.35	-5.24	6.59	8.7	1.84	3.46	7.27	-52.43	5.52	-6.86	0.82	-59.29	6.07	0.47	0.03	0.02	0.01	0.49	0.03	-51.96	5.51	-6.84	0.82	-58.8	6.07	-57.21	2.21	1.86
	76	77	PRO	309	12.32	1.55	14.07	1.31	26.39	2.08	-1.94	0.57	-0.83	0.65	-2.77	0.84	-12.14	0.72	14.43	0.98	2.29	0.76	-1.76	1.78	27.67	1.6	25.91	2.19	11.62	0.69	-14.8	0.89	-3.18	0.62	0.35	0.05	0.1	0.02	0.45	0.05	11.98	0.66	-14.7	0.88	-2.73	0.62	10.22	1.67	12.97
	77	78	PRO	310	12.27	1.46	13.05	1.33	25.31	2.11	-1.82	0.52	-1.79	0.75	-3.62	0.89	-7.88	0.78	-0.78	1.31	-8.66	1.17	2.56	1.79	10.47	1.63	13.03	2.28	7.07	0.74	-8.75	0.83	-1.68	0.68	0.47	0.05	0.01	0.01	0.48	0.05	7.54	0.75	-8.74	0.83	-1.2	0.69	10.11	1.61	1.73
	78	79	PHE	311	8.46	1.98	9.98	1.34	18.44	2.48	-4.06	0.75	-2.75	0.67	-6.81	1.11	-0.65	0.43	-6.9	1.06	-7.55	1.06	3.75	2.19	0.33	1.53	4.08	2.66	0.76	0.37	-1.88	0.61	-1.12	0.66	0.11	0.03	0.01	0.01	0.12	0.03	0.87	0.36	-1.88	0.61	-1.01	0.66	4.62	2.15	-1.55
	79	80	TYR	312	8.87	2.09	9.97	1.19	18.84	2.56	-3.81	0.66	-2.91	0.74	-6.72	1.01	-16.49	0.75	-5.81	0.78	-22.3	1.08	-11.44	2.27	1.25	1.43	-10.18	2.75	-3.97	0.6	-2.23	0.41	-6.2	0.74	0.24	0.04	0	0	0.24	0.04	-3.73	0.58	-2.23	0.41	-5.96	0.73	-15.17	2.21	-0.98
	80	81	ILE	313	9.73	2.41	10.58	1.29	20.31	2.78	-3.15	0.95	-2.13	0.85	-5.28	1.35	-5.57	0.51	-5.64	0.77	-11.22	0.78	1.01	2.77	2.81	1.56	3.81	2.82	3.78	0.48	-4.24	0.41	-0.45	0.37	0.02	0.02	0	0	0.02	0.02	3.81	0.47	-4.24	0.41	-0.43	0.36	4.81	2.59	-1.43
	81	82	ILE	314	10.5	1.92	10.79	1.22	21.29	2.32	-4.77	1	-1.78	0.88	-6.55	1.45	-5.5	0.35	-8.89	0.96	-14.38	0.9	0.23	2.11	0.12	1.29	0.35	2.41	3.53	0.31	-3.65	0.5	-0.13	0.31	0	0	0	0	0	0	3.53	0.31	-3.65	0.5	-0.12	0.31	3.76	2.06	-3.53
	82	83	ILE	315	8.85	1.93	10.05	1.19	18.91	2.48	-3.19	1.15	-1.61	0.96	-4.79	1.57	-6.44	0.36	-11.38	0.91	-17.82	0.95	-0.78	2.08	-2.93	1.34	-3.71	2.47	4.28	0.32	-3.92	0.46	0.35	0.45	0.04	0.03	0	0	0.04	0.03	4.32	0.32	-3.92	0.46	0.4	0.46	3.54	2.11	-6.86
	83	84	GLU	316	6.45	1.77	9.85	1.06	16.3	2.11	-2.71	1.08	-1.99	0.65	-4.7	1.32	-6.17	5.84	0.29	0.84	-5.87	5.85	-2.42	5.23	8.15	1.33	5.73	5.51	-56.99	4.4	-9.63	0.67	-66.62	4.53	0.18	0.03	0.01	0.01	0.19	0.03	-56.81	4.39	-9.62	0.67	-66.43	4.53	-59.23	2.3	-1.47
	84	85	PHE	317	7.89	2.06	9.8	1.37	17.68	2.49	-2.44	0.59	-2.16	0.61	-4.61	0.84	0.63	0.45	-1.99	1.01	-1.36	1.1	6.08	2.21	5.64	1.45	11.72	2.82	-0.92	0.39	-5.58	0.7	-6.5	0.82	0.35	0.05	0.1	0.02	0.46	0.05	-0.57	0.38	-5.48	0.7	-6.04	0.81	5.51	2.24	0.16
	85	86	MET	318	6.72	1.84	11.08	1.21	17.81	2.19	-6.24	0.82	-2.04	0.68	-8.28	1.13	-2.52	0.59	-2.41	0.93	-4.93	1.09	-2.03	2.13	6.63	1.35	4.6	2.58	2.55	0.43	-6.39	0.58	-3.84	0.72	0.04	0.01	0.05	0.02	0.1	0.02	2.59	0.43	-6.33	0.58	-3.74	0.71	0.56	2.14	0.3
	86	87	THR	319	6.44	1.38	12.33	1.51	18.77	2.09	-1.25	0.48	-0.58	0.62	-1.83	0.88	-24.8	1.74	-6.68	0.91	-31.48	2.28	-19.6	2.23	5.06	1.63	-14.54	3.19	0.83	1.18	-9.51	0.67	-8.68	1.54	0.45	0.04	0.18	0.02	0.64	0.05	1.28	1.17	-9.33	0.66	-8.05	1.53	-18.32	1.54	-4.26
	87	88	TYR	320	8.42	1.57	9.03	1.64	17.44	2.32	-0.23	0.91	-0.55	0.75	-0.78	1.26	-24.23	1.62	-1.07	1.09	-25.29	1.99	-16.04	2.21	7.41	1.82	-8.63	3.02	-0.57	0.71	-8.52	0.78	-9.1	1.01	0.6	0.06	0.15	0.03	0.75	0.06	0.03	0.7	-8.37	0.76	-8.35	1	-16.01	1.96	-0.96
	88	89	GLY	321	0	0	8.24	1.43	8.24	1.43	0	0	-2.01	0.67	-2.01	0.67	0	0	-8.51	1.2	-8.51	1.2	0	0	-2.28	1.58	-2.28	1.58	0	0	-3.15	0.93	-3.15	0.93	0	0	0.16	0.03	0.16	0.03	0	0	-2.99	0.93	-2.99	0.93	0	0	-5.27
	89	90	ASN	322	11.59	1.77	10.24	1.34	21.84	2.27	-4.24	0.79	-3.19	0.61	-7.43	1.04	-79.93	2.05	-1.62	1.32	-81.55	2.55	-72.58	2.7	5.44	1.68	-67.14	3.42	-5.59	1.37	-4.92	0.9	-10.51	1.84	0.05	0.04	0.01	0.01	0.06	0.04	-5.54	1.36	-4.91	0.9	-10.45	1.82	-78.12	2	0.52
	90	91	LEU	323	8.96	1.98	11.1	1.35	20.06	2.27	-4.67	0.85	-2.09	1.03	-6.76	1.32	-29.12	0.37	0.08	0.77	-29.05	0.83	-24.84	1.92	9.09	1.47	-15.75	2.22	5.27	0.21	-8.24	0.49	-2.97	0.46	0	0	0	0	0	0	5.27	0.21	-8.24	0.49	-2.97	0.46	-19.57	1.93	0.85
	91	92	LEU	324	8.3	1.9	11.62	1.23	19.92	2.43	-2.64	0.92	-2.5	0.81	-5.14	1.28	-28.99	0.44	-4.1	0.98	-33.09	1.14	-23.33	2.13	5.02	1.53	-18.31	2.78	5.04	0.28	-7.8	0.66	-2.76	0.7	0.19	0.04	0	0	0.19	0.04	5.23	0.29	-7.8	0.66	-2.57	0.71	-18.1	2.16	-2.78
	92	93	ASP	325	4.41	1.37	10.58	1.3	14.99	1.89	-2.18	0.38	-2.28	0.68	-4.46	0.82	58.35	5.5	4.72	1.69	63.07	6.06	60.58	5.52	13.02	2.02	73.6	6.28	-122.17	5.31	-19.55	1.49	-141.72	5.75	0.5	0.08	0.01	0.01	0.51	0.08	-121.67	5.31	-19.54	1.48	-141.21	5.76	-61.09	1.23	-6.51
	93	94	TYR	326	8.59	1.79	11.01	1.46	19.6	2.37	-2.98	0.8	-2.36	0.7	-5.34	1.05	-20.76	1.35	-3.85	1.33	-24.6	2.06	-15.14	2.27	4.8	1.53	-10.34	2.96	-1.67	0.8	-5.54	0.71	-7.21	1.18	0.21	0.06	0.03	0.02	0.23	0.07	-1.46	0.76	-5.51	0.71	-6.97	1.14	-16.61	2.01	-0.71
	94	95	LEU	327	9.16	1.86	11.48	1.41	20.65	2.45	-4.69	0.95	-2.21	0.73	-6.9	1.29	-29.33	0.45	6.95	1.25	-22.38	1.16	-24.86	1.89	16.23	1.75	-8.64	2.58	5.9	0.28	-8.91	1.03	-3.02	0.88	0	0	0.01	0.01	0.01	0.01	5.9	0.28	-8.9	1.04	-3	0.88	-18.96	1.88	7.33
	95	96	ARG	328	12.06	2.32	10.54	1.43	22.6	2.65	-3.79	0.9	-0.7	0.59	-4.49	1.17	-242.87	4.02	-9.41	1.07	-252.28	3.74	-234.6	3.86	0.43	1.33	-234.17	4.08	56.97	3.93	-5.36	0.57	51.61	3.78	0.78	0.06	0.25	0.03	1.03	0.07	57.75	3.9	-5.11	0.57	52.64	3.75	-176.85	2.38	-4.68
	96	97	GLU	329	6.28	1.7	10.91	1.54	17.18	2.35	-0.75	0.64	0.36	0.81	-0.39	1.18	73.21	4.16	-3.46	1.18	69.75	4.5	78.73	4.78	7.81	1.8	86.54	5.14	-135.92	4.1	-14.66	0.79	-150.58	4.44	0.86	0.06	0.21	0.03	1.07	0.05	-135.07	4.13	-14.45	0.8	-149.51	4.46	-56.33	1.65	-6.64
	97	98	CYS	330	3.59	1.11	10.08	1.37	13.67	1.8	-2.94	0.58	-0.24	0.85	-3.18	1.05	5.7	0.95	-5.6	1.32	0.11	1.61	6.35	1.55	4.24	1.57	10.59	2.08	-1.27	0.62	-2.63	1.21	-3.9	1.29	0.03	0.02	0.14	0.03	0.17	0.04	-1.24	0.62	-2.49	1.19	-3.73	1.27	5.12	1.2	1.75
	98	99	ASN	331	10.81	1.61	10.76	1.15	21.57	2.22	-1.65	0.68	-0.67	0.76	-2.32	1.16	-85.26	2.76	-0.68	1.31	-85.93	2.96	-76.09	3	9.41	1.33	-66.68	3.49	-2.66	1.9	-3.01	0.56	-5.66	2.06	0.51	0.06	0.1	0.02	0.6	0.07	-2.15	1.84	-2.91	0.56	-5.06	2	-78.24	1.62	6.5
	99	100	ARG	332	13.11	2.81	11.42	1.48	24.53	3.22	-2.79	0.98	-0.82	0.55	-3.61	1.15	-227.68	13.29	-2.51	1.12	-230.2	13.36	-217.36	13.25	8.08	1.34	-209.28	13.28	41.8	10.5	-6.82	0.82	34.98	10.49	0.9	0.13	0.18	0.03	1.08	0.13	42.71	10.41	-6.64	0.82	36.06	10.4	-174.66	3.91	1.44
	100	101	GLN	333	13.68	1.85	10.17	1.46	23.85	2.54	-0.09	0.71	0.77	0.75	0.68	1.1	-64.57	1.77	-11.48	0.99	-76.05	1.86	-50.98	2.23	-0.54	1.54	-51.52	2.74	-10.66	1.46	-6.1	0.77	-16.76	1.55	1.02	0.05	0.27	0.04	1.29	0.05	-9.63	1.44	-5.83	0.75	-15.47	1.53	-60.62	1.61	-6.37
	101	102	GLU	334	6.11	1.68	10.82	1.35	16.93	2.25	-0.99	0.55	-0.09	0.79	-1.08	1.01	47.75	4.94	1.1	1.58	48.85	5.88	52.87	4.93	11.83	1.97	64.7	6.08	-110.91	4.6	-11.63	1.26	-122.54	5.38	0.79	0.07	0.16	0.04	0.95	0.09	-110.12	4.59	-11.47	1.23	-121.59	5.35	-57.25	1.7	0.36
	102	103	VAL	335	6.35	1.52	9.9	1.22	16.25	2.11	-2.59	0.73	-0.47	0.83	-3.06	1.14	-22.98	0.5	-0.51	1.25	-23.49	1.31	-19.22	1.62	8.92	1.79	-10.3	2.62	7.67	0.46	-11.67	1.13	-4	1.09	0.02	0.02	0.02	0.02	0.04	0.03	7.69	0.46	-11.65	1.12	-3.96	1.07	-11.53	1.57	-2.73
	103	104	ASN	336	11.05	1.66	9.88	1.21	20.92	2.17	-1.62	0.75	-0.51	0.86	-2.13	1.23	-81.05	2.91	-7.26	1.35	-88.3	3.55	-71.62	2.8	2.11	1.8	-69.51	3.93	-5.2	2.43	-3.61	0.59	-8.82	2.78	0.54	0.06	0.03	0.01	0.57	0.06	-4.66	2.39	-3.58	0.59	-8.24	2.74	-76.29	1.6	-1.47
	104	105	ALA	337	2.89	0.94	11.22	1.49	14.11	1.9	-1.1	0.28	-2.04	0.68	-3.14	0.71	2.29	0.15	-3.35	0.94	-1.05	0.96	4.09	0.95	5.83	1.4	9.92	1.92	-0.3	0.07	-3.71	0.6	-4.01	0.62	0.17	0.04	0.05	0.01	0.22	0.04	-0.13	0.08	-3.66	0.6	-3.79	0.62	3.96	0.95	2.17
	105	106	VAL	338	6.45	1.83	10.78	1.35	17.24	2.31	0.63	0.68	-0.15	0.88	0.48	1.19	-21.4	0.48	-3.38	1.15	-24.78	1.23	-14.31	1.85	7.25	1.67	-7.06	2.74	6.16	0.38	-9.56	0.73	-3.41	0.72	0.78	0.04	0.02	0.02	0.8	0.04	6.94	0.38	-9.54	0.73	-2.6	0.71	-7.37	1.9	-2.29
	106	107	VAL	339	6.11	1.68	10.98	1.12	17.1	2.05	-2.05	0.72	-0.59	0.97	-2.64	1.3	-22.06	0.48	-4.82	1	-26.87	1.08	-17.99	1.91	5.58	1.5	-12.41	2.51	7.1	0.38	-8.83	0.49	-1.73	0.46	0.2	0.05	0.01	0.01	0.2	0.05	7.3	0.38	-8.82	0.49	-1.52	0.45	-10.7	1.87	-3.24
	107	108	LEU	340	8.84	1.79	11.45	1.41	20.29	2.31	-4.03	0.92	-2.28	0.9	-6.31	1.33	-28.19	0.41	-1.91	0.97	-30.1	1.02	-23.39	1.98	7.26	1.64	-16.12	2.6	4.93	0.28	-6.53	0.42	-1.61	0.42	0	0	0	0	0.01	0.01	4.93	0.28	-6.53	0.42	-1.6	0.42	-18.46	1.96	0.74
	108	109	LEU	341	8.66	1.82	11.32	1.33	19.98	2.29	-1.79	0.92	-0.97	1.01	-2.76	1.38	-28.71	0.51	-6.74	1.49	-35.45	1.57	-21.84	2.19	3.6	1.67	-18.24	2.75	4.87	0.32	-6.58	0.45	-1.71	0.43	0.26	0.08	0.01	0.01	0.27	0.08	5.13	0.32	-6.57	0.45	-1.43	0.44	-16.71	2.12	-2.96
	109	110	TYR	342	8.73	1.95	11.2	1.47	19.94	2.39	-1.55	0.69	-1.92	0.92	-3.47	1.2	-19.5	0.52	-8.93	1.11	-28.43	1.18	-12.32	2.12	0.36	1.54	-11.96	2.49	-2.64	0.5	-3.36	0.47	-6.01	0.75	0.77	0.07	0.02	0.01	0.79	0.07	-1.87	0.45	-3.34	0.47	-5.22	0.69	-14.2	2.09	-2.98
	110	111	MET	343	7.3	1.76	11.42	1.3	18.72	2.26	-6.47	0.56	-3.05	0.82	-9.52	1.05	-3.18	0.5	-6.55	1.07	-9.73	1.15	-2.35	1.75	1.82	1.49	-0.52	2.43	3.15	0.35	-4.39	0.45	-1.24	0.5	0	0.01	0	0	0	0.01	3.15	0.35	-4.39	0.45	-1.24	0.5	0.81	1.74	-2.57
	111	112	ALA	344	2.65	0.81	11.33	1.27	13.98	1.71	-1.84	0.29	-3.15	0.88	-5	0.89	2.32	0.11	-9.88	1.47	-7.56	1.49	3.12	0.87	-1.7	1.74	1.42	2.13	-0.3	0.04	-0.34	0.38	-0.64	0.39	0.01	0.01	0	0	0.01	0.01	-0.29	0.04	-0.34	0.38	-0.63	0.39	2.84	0.87	-2.05
	112	113	THR	345	6.75	1.4	11.26	1.32	18	2.05	-2.06	0.83	-0.89	1.05	-2.94	1.4	-26.77	1.05	-13.42	1.78	-40.2	1.9	-22.08	1.66	-3.05	1.83	-25.13	2.56	2.61	0.52	-4.14	0.57	-1.52	0.73	0.25	0.04	0.01	0.01	0.26	0.04	2.87	0.52	-4.13	0.57	-1.26	0.72	-19.22	1.6	-7.18
	113	114	GLN	346	13.65	1.76	10.48	1.27	24.12	2.17	-5.29	0.87	-3.02	0.65	-8.31	1.03	-76.02	1.47	-4.96	0.8	-80.98	1.55	-67.66	1.86	2.49	1.22	-65.16	2.33	1.92	0.66	-2.65	0.41	-0.73	0.84	0.08	0.03	0.01	0.01	0.1	0.03	2	0.67	-2.64	0.4	-0.64	0.85	-65.65	1.68	-0.15
	114	115	ILE	347	9.38	1.96	11.53	1.36	20.91	2.68	-3.55	0.92	-1.17	0.91	-4.72	1.31	-7.68	0.3	-5.31	1	-12.99	0.99	-1.85	2.04	5.04	1.68	3.19	2.7	5.98	0.25	-6.5	0.45	-0.52	0.41	0	0	0	0	0	0	5.98	0.25	-6.5	0.45	-0.51	0.41	4.13	2	-1.45
	115	116	SER	348	3.78	1.01	11.35	1.41	15.13	1.94	-2.59	0.61	-2.61	0.91	-5.2	1.19	-5.92	1.51	-9.02	1.11	-14.94	2.06	-4.73	1.86	-0.28	1.58	-5.01	2.85	3.05	0.88	-5.44	0.59	-2.4	1.1	0	0	0	0	0	0	3.05	0.88	-5.44	0.59	-2.39	1.1	-1.68	1.4	-5.72
	116	117	SER	349	3.58	0.85	11.24	1.26	14.82	1.54	-1.65	0.58	-2.95	0.64	-4.59	0.86	-5.94	2.23	-6.38	1.11	-12.32	2.53	-4.01	2.01	1.91	1.67	-2.09	2.58	1.41	1.27	-5.55	0.8	-4.14	1.59	0.16	0.03	0.01	0.01	0.17	0.03	1.57	1.25	-5.54	0.8	-3.97	1.57	-2.43	1.11	-3.63
	117	118	ALA	350	2.82	0.93	10.8	1.21	13.62	1.65	-2.11	0.38	-3.42	0.7	-5.53	0.72	2.27	0.13	-9.17	0.86	-6.9	0.87	2.98	1.05	-1.79	1.22	1.19	1.67	-0.24	0.05	0.69	0.37	0.45	0.39	0	0	0	0	0	0	-0.24	0.05	0.69	0.37	0.45	0.39	2.75	1.05	-1.11
	118	119	MET	351	7.28	1.8	11.03	1.26	18.31	2.23	-6.63	0.75	-2.65	0.9	-9.28	1.26	-4.1	0.45	-9.2	1.03	-13.3	1.03	-3.45	1.94	-0.82	1.41	-4.28	2.35	3.8	0.28	-3.52	0.54	0.28	0.51	0.01	0.01	0	0	0.01	0.01	3.81	0.28	-3.52	0.54	0.29	0.51	0.35	1.89	-4.34
	119	120	GLU	352	8.5	2.32	10.94	1.41	19.43	2.79	-3.03	0.94	-2.7	0.91	-5.73	1.37	23.43	4.33	-5.23	2.3	18.2	4.98	28.89	4.57	3.01	2.28	31.9	4.85	-84.85	4.07	-7.6	1.16	-92.44	4.29	0.28	0.04	0	0	0.28	0.04	-84.57	4.06	-7.6	1.16	-92.16	4.28	-55.68	2.15	-4.59
	120	121	TYR	353	8.22	1.97	11.48	1.39	19.7	2.62	-3.71	0.63	-2.82	0.67	-6.53	0.85	-17.89	1.05	-7.49	1.02	-25.38	1.34	-13.38	2.24	1.16	1.48	-12.21	2.93	-3.75	0.75	-0.41	0.66	-4.16	0.87	0.34	0.05	0	0	0.34	0.05	-3.42	0.76	-0.41	0.66	-3.82	0.88	-16.8	2.19	0.76
	121	122	LEU	354	8.97	2.02	11.56	1.5	20.53	2.67	-3.74	0.72	-2.49	0.7	-6.23	1.06	-27.96	0.38	-9.23	0.94	-37.19	1.01	-22.73	2.16	-0.16	1.65	-22.89	2.74	4.51	0.26	-2.96	0.59	1.55	0.57	0.01	0.01	0	0	0.01	0.01	4.52	0.26	-2.96	0.59	1.56	0.57	-18.21	2.17	-3.12
	122	123	GLU	355	5.88	1.89	11.45	1.46	17.33	2.56	-4.06	0.81	-1.62	0.79	-5.68	1.09	23.79	3.98	-0.66	1.18	23.13	4.26	25.62	4.23	9.17	1.62	34.79	4.9	-79.32	3.87	-7.37	0.95	-86.69	4.16	0.13	0.03	0.05	0.02	0.17	0.03	-79.19	3.86	-7.32	0.94	-86.52	4.15	-53.58	2.04	1.85
	123	124	LYS	356	11.04	2.26	10.74	1.27	21.78	2.65	-0.47	1	-0.51	0.71	-0.98	1.28	-72.83	5.92	1.19	1.48	-71.64	5.73	-62.25	5.83	11.42	1.97	-50.83	5.8	43.77	5.71	-3.86	0.99	39.91	5.58	0.82	0.06	0.25	0.02	1.07	0.06	44.58	5.68	-3.6	0.99	40.98	5.55	-17.67	2.45	7.81
	124	125	LYS	357	11.53	2.17	10	1.44	21.53	2.73	-2.89	0.9	0.25	0.76	-2.64	1.38	-35.94	10.53	-8.47	0.89	-44.41	10.7	-27.29	10.63	1.77	1.55	-25.52	10.94	8.98	9.59	-3.97	0.73	5.01	9.87	0.53	0.11	0.18	0.03	0.71	0.12	9.51	9.5	-3.79	0.72	5.72	9.77	-17.78	2.67	-2.01
	125	126	ASN	358	11.61	1.88	10.71	1.56	22.32	2.85	-0.75	0.52	-0.2	0.86	-0.95	1.17	-75.66	1.35	-14.34	1.62	-90	2.2	-64.8	1.72	-3.84	2.15	-68.64	3.08	-11.2	0.98	-1.63	1.22	-12.84	1.7	0.73	0.05	0.1	0.03	0.82	0.06	-10.48	0.96	-1.54	1.2	-12.01	1.69	-75.28	1.65	-5.37
	126	127	PHE	359	8.04	1.89	9.97	1.18	18	2.29	-1.99	0.74	-1.18	0.72	-3.17	0.97	0.05	0.39	-2.35	0.79	-2.3	0.88	6.09	2.14	6.44	1.52	12.53	2.72	0.16	0.31	-5.47	0.54	-5.31	0.61	0.24	0.12	0.04	0.01	0.29	0.12	0.4	0.31	-5.43	0.54	-5.03	0.63	6.49	2.12	1.01
	127	128	ILE	360	9.74	2.07	10.76	1.29	20.51	2.51	-2.04	0.99	-0.59	0.77	-2.63	1.39	-7.03	0.46	-0.29	1.38	-7.32	1.45	0.68	2.24	9.88	1.84	10.56	2.75	4.88	0.38	-8.86	1.29	-3.99	1.18	0.27	0.07	0.11	0.04	0.38	0.07	5.14	0.38	-8.75	1.26	-3.61	1.17	5.82	2.13	1.13
	128	129	HIS	361	24.9	1.61	11.6	1.24	36.49	2.05	-7.38	0.71	-1.16	0.92	-8.54	1.19	-12.56	1.39	-0.8	1.17	-13.36	1.92	4.96	1.93	9.63	1.72	14.6	2.74	-1.01	0.85	-5.78	1.02	-6.79	1.41	0.01	0.01	0.06	0.03	0.07	0.03	-1	0.85	-5.72	1.01	-6.72	1.4	3.97	1.78	3.91
	129	130	ARG	362	12.88	2.88	11.79	1.38	24.66	3.44	-2.96	1.02	-0.96	0.65	-3.92	1.39	-210.65	5.51	-11.29	0.99	-221.94	5.37	-200.74	6.56	-0.46	1.36	-201.2	6.53	26.7	5.56	-2.47	0.56	24.23	5.38	0.8	0.14	0.08	0.02	0.88	0.14	27.5	5.51	-2.39	0.57	25.11	5.32	-173.24	2.93	-2.85
	130	131	ASP	363	4.39	1.57	10.05	1.31	14.44	2.14	-0.34	1.66	-0.47	0.91	-0.81	2.2	-11.33	4.28	-8.5	1.52	-19.83	5.18	-7.29	4.11	1.08	1.72	-6.21	4.91	-55.76	3.48	-9.4	0.61	-65.16	3.99	0.03	0.02	0	0	0.03	0.02	-55.73	3.48	-9.4	0.61	-65.13	3.98	-63.02	1.74	-8.31
	131	132	LEU	364	8.69	1.84	11.67	1.26	20.36	2.41	-3.91	0.92	-2.38	0.78	-6.29	1.4	-29.14	0.37	0.5	0.74	-28.64	0.79	-24.35	2.05	9.78	1.31	-14.57	2.43	5.14	0.21	-7.07	0.47	-1.93	0.45	0	0	0	0	0	0.01	5.14	0.21	-7.07	0.47	-1.93	0.45	-19.22	2.02	2.71
	132	133	ALA	365	2.27	0.71	10.29	1.32	12.55	1.57	-1.86	0.44	-2.59	0.82	-4.45	0.95	2.29	0.12	-8.32	1.33	-6.03	1.33	2.7	0.85	-0.62	1.71	2.08	2.02	-0.38	0.06	0	0.46	-0.38	0.49	0	0	0	0	0	0	-0.38	0.06	0	0.46	-0.38	0.49	2.32	0.84	-0.62
	133	134	ALA	366	2.83	0.9	11.08	1.22	13.9	1.53	-2.03	0.4	-3.79	0.61	-5.82	0.74	1.96	0.15	0.64	1.41	2.6	1.37	2.76	1.01	7.93	1.96	10.69	2.16	-0.03	0.07	-1	0.68	-1.03	0.66	0	0	0	0	0	0	-0.03	0.07	-1	0.68	-1.03	0.66	2.72	1.01	6.94
	134	135	ARG	367	12.53	2.52	11.4	1.67	23.93	2.99	-4.9	1.28	-2.07	0.71	-6.97	1.48	-241.97	3.64	-1.42	1.01	-243.38	3.85	-234.33	3.75	7.91	1.66	-226.42	4.48	55.22	3.26	-6.16	0.58	49.06	3.3	0.18	0.04	0.01	0.01	0.19	0.04	55.39	3.25	-6.15	0.57	49.25	3.3	-178.94	2.31	1.77
	135	136	ASN	368	11.7	1.61	10.16	1.54	21.87	2.28	-3.4	0.9	-1.61	0.9	-5.01	1.38	-82.94	1.3	-14.03	1.12	-96.97	1.65	-74.64	1.62	-5.48	1.71	-80.11	2.44	-3.71	0.74	-0.5	0.4	-4.22	0.84	0.02	0.01	0	0	0.02	0.01	-3.7	0.74	-0.5	0.4	-4.2	0.84	-78.33	1.47	-5.98
	136	137	CYS	369	3.12	0.99	9.67	1.04	12.79	1.59	-4.2	0.41	-2.33	0.81	-6.53	0.87	6.72	0.64	-6.67	0.99	0.05	1.12	5.64	1.27	0.66	1.4	6.3	2.05	-1.96	0.35	0.04	0.36	-1.92	0.44	0	0	0	0	0	0	-1.96	0.35	0.04	0.36	-1.92	0.44	3.69	1.13	0.7
	137	138	LEU	370	8.68	1.98	10.54	1.38	19.22	2.55	-3.73	0.9	-1.82	0.94	-5.55	1.4	-27.75	0.38	-3.07	0.94	-30.82	0.97	-22.79	2.13	5.65	1.56	-17.14	2.73	4.48	0.23	-4.78	0.43	-0.3	0.41	0.05	0.02	0	0	0.05	0.02	4.53	0.23	-4.78	0.43	-0.25	0.41	-18.26	2.1	0.87
	138	139	VAL	371	6.3	1.38	9.8	1.18	16.1	1.99	-3.56	0.79	-1.99	0.91	-5.54	1.25	-24.11	0.46	-8.17	0.9	-32.28	0.97	-21.37	1.52	-0.35	1.56	-21.72	2.16	8.49	0.33	-7.9	0.66	0.59	0.56	0	0	0	0	0	0	8.49	0.33	-7.9	0.66	0.59	0.56	-12.88	1.5	-8.25
	139	140	GLY	372	0	0	9.18	1.39	9.18	1.39	0	0	-2.82	0.76	-2.82	0.76	0	0	-7.83	1.21	-7.83	1.21	0	0	-1.47	1.72	-1.47	1.72	0	0	-6.02	0.79	-6.02	0.79	0	0	0.03	0.01	0.03	0.01	0	0	-5.99	0.8	-5.99	0.8	0	0	-7.46
	140	141	GLU	373	6.31	1.74	9.62	1.26	15.93	2.23	-0.48	0.88	-0.68	0.71	-1.17	1.17	35.7	3.47	1.82	1.1	37.52	3.66	41.52	3.99	10.76	1.5	52.28	4.37	-98.18	3.4	-11.1	0.87	-109.28	3.56	0.78	0.03	0.09	0.02	0.86	0.03	-97.4	3.39	-11.01	0.86	-108.41	3.55	-55.88	1.73	-0.25
	141	142	ASN	374	11.35	2.08	11.04	1.3	22.39	2.5	-0.33	0.46	-0.35	0.68	-0.68	0.92	-75.27	1.52	-7.91	2.13	-83.18	2.29	-64.25	2.11	2.78	2.36	-61.47	2.94	-12.37	1.22	-1.43	1.44	-13.8	1.64	0.81	0.03	0.08	0.03	0.89	0.05	-11.56	1.21	-1.35	1.43	-12.91	1.62	-75.8	1.79	1.43
	142	143	HIS	375	24.95	1.69	11.1	1.44	36.05	2.37	-3.94	0.76	-2.09	0.66	-6.03	1.1	-13.95	2.66	-6.47	0.92	-20.42	2.64	7.06	3.13	2.54	1.71	9.6	3.57	-1.4	1.9	-3.78	0.46	-5.18	1.87	0.29	0.09	0.01	0.01	0.29	0.09	-1.12	1.83	-3.77	0.46	-4.89	1.8	5.95	1.91	-1.23
	143	144	LEU	376	11.03	1.87	10.86	1.36	21.89	2.43	-1.99	0.8	-1.19	0.86	-3.17	1.32	-28.67	0.4	-2.62	1.09	-31.29	1.19	-19.62	2.01	7.05	1.59	-12.57	2.72	4.52	0.28	-6.36	0.59	-1.84	0.67	0.4	0.05	0	0	0.4	0.05	4.92	0.28	-6.36	0.59	-1.43	0.68	-14.69	1.93	0.69
	144	145	VAL	377	6.49	1.91	10.2	1.39	16.69	2.39	-3.73	0.76	-1.85	0.82	-5.58	1.25	-23.21	0.38	-1.63	1.12	-24.84	1.14	-20.45	2	6.72	1.59	-13.74	2.7	7.67	0.27	-7.92	0.5	-0.25	0.41	0	0	0	0	0	0	7.67	0.27	-7.92	0.5	-0.25	0.41	-12.79	1.97	-1.2
	145	146	LYS	378	10.73	2.14	9.97	1.14	20.71	2.65	-5.22	0.99	-1.92	0.86	-7.14	1.16	-72.76	4.56	-7.42	0.84	-80.18	4.75	-67.25	4.69	0.63	1.25	-66.61	4.96	45.41	4.02	-2.29	0.32	43.13	4.06	0.19	0.04	0	0	0.19	0.04	45.6	4.02	-2.29	0.32	43.32	4.05	-21.64	2.62	-1.65
	146	147	VAL	379	6.18	1.6	9.82	1.3	16	2.17	-2.95	0.76	-1.65	0.83	-4.6	1.27	-22.12	0.4	-11.97	1.03	-34.09	1.06	-18.9	1.81	-3.8	1.59	-22.7	2.45	6.8	0.32	-6.73	0.49	0.07	0.39	0.01	0.01	0	0	0.01	0.01	6.81	0.32	-6.73	0.49	0.08	0.39	-12.09	1.79	-10.53
	147	148	ALA	380	2.33	0.67	9.55	1.4	11.87	1.73	-1.64	0.37	-1.47	0.78	-3.11	0.82	2.23	0.13	-7.83	0.87	-5.59	0.89	2.92	0.76	0.25	1.47	3.17	1.78	-0.26	0.06	-2.29	0.49	-2.54	0.52	0	0	0.02	0.01	0.02	0.01	-0.25	0.06	-2.27	0.49	-2.53	0.52	2.67	0.76	-2.02
	148	149	ASP	381	3.73	1.33	9.44	1.11	13.16	1.81	-2.72	0.67	-0.77	0.89	-3.49	1.26	29.79	6.28	-4.82	2.02	24.97	7.38	30.79	6.56	3.85	2.06	34.64	7.57	-89.81	6.24	-6.86	1.49	-96.67	7.13	0.17	0.06	0.03	0.01	0.2	0.06	-89.65	6.21	-6.83	1.49	-96.48	7.1	-58.85	1.29	-2.98
	149	150	PHE	382	7.24	1.62	8.85	1.5	16.1	2.43	-3.23	0.66	-0.71	0.64	-3.94	1.05	0.64	0.32	-3.38	1.05	-2.74	1.14	4.66	1.81	4.76	1.6	9.41	2.67	0.18	0.24	-4.09	0.85	-3.91	0.91	0.02	0.01	0.12	0.04	0.14	0.05	0.19	0.24	-3.96	0.84	-3.77	0.89	4.85	1.79	0.8
	150	151	GLY	383	0	0	9.22	1.54	9.22	1.54	0	0	-1.49	0.71	-1.49	0.71	0	0	-11.25	2.27	-11.25	2.27	0	0	-3.53	2.46	-3.53	2.46	0	0	0.43	1.27	0.43	1.27	0	0	0.18	0.05	0.18	0.05	0	0	0.61	1.26	0.61	1.26	0	0	-2.92
	151	152	LEU	384	8.44	1.72	11.11	1.43	19.55	2.27	-2.78	0.85	-1.29	0.99	-4.07	1.38	-28.11	0.44	-5.5	1.34	-33.61	1.36	-22.45	1.99	4.32	1.84	-18.13	2.61	4.09	0.3	-4.15	0.62	-0.06	0.65	0.1	0.05	0.01	0.01	0.11	0.05	4.19	0.29	-4.14	0.62	0.04	0.64	-18.27	1.92	0.18
	152	153	SER	385	3.82	1.23	10.68	1.28	14.5	1.87	-2.04	0.38	-1.39	0.74	-3.43	0.91	-3.12	0.89	-5.14	1.74	-8.26	2.02	-1.34	1.7	4.16	1.9	2.81	2.65	0.32	0.84	-2.41	0.97	-2.09	1.09	0.14	0.05	0.02	0.01	0.16	0.05	0.46	0.83	-2.39	0.97	-1.93	1.08	-0.88	1.54	1.77
	153	154	ARG	386	13.59	2.74	10.36	1.31	23.95	3.01	-0.17	1.33	0.26	0.77	0.09	1.6	-242.38	8.05	-0.81	1.75	-243.18	7.84	-228.95	7.99	9.81	1.96	-219.14	7.84	51.38	6.86	-6.44	1.56	44.94	6.49	0.97	0.18	0.22	0.05	1.19	0.19	52.35	6.92	-6.22	1.52	46.13	6.55	-176.61	2.93	3.6
	154	155	LEU	387	8.5	1.94	10.74	1.4	19.24	2.33	-0.59	0.8	0.33	0.76	-0.26	1.23	-27.7	0.54	-4.93	1.09	-32.63	1	-19.79	2.02	6.14	1.33	-13.65	2.27	3.96	0.39	-8.33	0.66	-4.37	0.57	0.63	0.12	0.23	0.04	0.87	0.13	4.6	0.4	-8.1	0.65	-3.5	0.56	-15.19	2.02	-1.96
	155	156	MET	388	6.98	1.8	9.59	1.28	16.58	2.32	-3.13	0.66	-0.39	0.92	-3.52	1.14	-1.35	0.78	-9.35	1.45	-10.7	1.63	2.51	2.15	-0.16	1.58	2.35	2.7	0.72	0.61	-3.18	0.66	-2.46	0.92	0.58	0.1	0.04	0.02	0.62	0.1	1.29	0.6	-3.14	0.66	-1.85	0.9	3.8	1.96	-3.3
	156	157	THR	389	6.29	1.42	9.57	1.25	15.86	1.95	-0.94	0.6	0.08	0.64	-0.86	0.96	-25.09	1.54	-7.2	0.9	-32.29	1.91	-19.73	1.92	2.44	1.33	-17.29	2.48	0.19	0.66	-6.69	0.56	-6.51	0.89	0.48	0.05	0.21	0.04	0.69	0.06	0.67	0.64	-6.48	0.54	-5.82	0.87	-19.07	1.7	-4.04
	157	158	GLY	390	0	0	9.23	1.43	9.23	1.43	0	0	-1.91	0.62	-1.91	0.62	0	0	-8.74	1.49	-8.74	1.49	0	0	-1.41	2	-1.41	2	0	0	-3.62	0.88	-3.62	0.88	0	0	0.26	0.05	0.26	0.05	0	0	-3.36	0.85	-3.36	0.85	0	0	-4.77
	158	159	ASP	391	4.25	1.52	11.04	1.29	15.29	2.18	-0.95	0.33	-1.01	0.64	-1.96	0.81	25.69	3.01	0.47	1.13	26.16	3.64	28.99	3.64	10.5	1.68	39.49	4.59	-89.93	3.28	-13.3	1.02	-103.23	4.01	0.71	0.06	0.11	0.03	0.82	0.08	-89.22	3.24	-13.19	1.01	-102.4	3.96	-60.22	1.33	-2.69
	159	160	THR	392	6.5	1.58	11.54	1.26	18.04	2.11	-2.15	0.58	-1.23	0.68	-3.38	0.99	-21.16	1.16	-6.55	1.23	-27.71	2.06	-16.82	1.59	3.76	1.68	-13.05	2.55	-1.87	0.87	-6.5	0.7	-8.37	1.31	0.27	0.04	0.03	0.01	0.3	0.05	-1.6	0.87	-6.47	0.7	-8.07	1.31	-18.42	1.59	-2.7
	160	161	TYR	393	8.24	2.07	11.77	1.42	20.01	2.63	-4.4	0.98	-2.56	0.83	-6.96	1.35	-24.71	1.1	-7.97	1.14	-32.68	1.53	-20.87	2.35	1.24	1.72	-19.63	3.25	0.15	0.48	-1.49	0.64	-1.35	0.8	0.05	0.03	0	0	0.05	0.03	0.19	0.46	-1.49	0.64	-1.3	0.79	-20.68	2.31	-0.25
	161	162	THR	394	6.6	1.49	10.9	1.13	17.5	1.94	-2.82	0.71	-1.21	0.88	-4.03	1.23	-23.85	1.55	-11.14	1.55	-34.98	2.49	-20.06	2.04	-1.45	1.66	-21.51	2.6	0.75	1.13	-2.93	0.89	-2.18	1.51	0.08	0.04	0	0.01	0.08	0.04	0.83	1.11	-2.92	0.89	-2.1	1.49	-19.24	1.57	-4.37
	162	163	ALA	395	2.68	0.85	10.35	1.31	13.03	1.72	-0.92	0.38	-1.27	0.7	-2.19	0.87	2.47	0.16	-0.96	1.62	1.52	1.63	4.23	0.97	8.13	1.76	12.35	2.1	-0.39	0.07	-4.78	1.23	-5.17	1.23	0.23	0.05	0.19	0.04	0.42	0.07	-0.17	0.09	-4.59	1.21	-4.76	1.18	4.06	0.99	3.54
	163	164	HIS	396	24.76	1.74	9.71	1.3	34.47	2.22	-3.72	0.61	-0.79	0.81	-4.51	1.13	-12.57	1.59	-5.1	1.35	-17.67	2.56	8.47	2.57	3.82	1.74	12.29	3.44	-3.77	1.43	-5.38	0.99	-9.15	2.05	0.58	0.07	0.06	0.02	0.64	0.07	-3.2	1.39	-5.32	0.99	-8.51	2.02	5.28	1.78	-1.5
	164	165	ALA	397	2.47	0.79	9.88	1.43	12.35	1.8	-0.22	0.38	0.38	0.52	0.16	0.68	2.05	0.11	-1.56	1.24	0.5	1.25	4.3	0.91	8.7	1.71	13	2.1	0.12	0.07	-8.28	0.91	-8.17	0.89	0.32	0.07	0.38	0.05	0.7	0.1	0.43	0.08	-7.9	0.89	-7.47	0.86	4.73	0.93	0.8
	165	166	GLY	398	0	0	9.19	1.29	9.19	1.29	0	0	0.31	0.64	0.31	0.64	0	0	-6.43	1.48	-6.43	1.48	0	0	3.07	2.02	3.07	2.02	0	0	-6.68	1.28	-6.68	1.28	0	0	0.65	0.06	0.65	0.06	0	0	-6.03	1.23	-6.03	1.23	0	0	-2.95
	166	167	ALA	399	2.51	0.87	9.8	1.57	12.31	1.93	-0.79	0.33	-0.66	0.87	-1.45	0.9	2.19	0.11	-1	1.42	1.2	1.46	3.91	0.88	8.15	1.78	12.06	2	0.07	0.07	-2.37	0.67	-2.3	0.66	0.22	0.05	0.07	0.02	0.29	0.05	0.29	0.08	-2.3	0.66	-2.01	0.66	4.2	0.89	5.85
	167	168	LYS	400	10.77	2.25	10.52	1.32	21.29	2.91	-2.41	1.1	-0.82	0.66	-3.23	1.33	-56.33	4.01	-2.16	0.87	-58.49	3.92	-47.97	4.42	7.54	1.51	-40.43	4.67	30.54	3.55	-5.36	0.73	25.18	3.55	0.42	0.04	0.18	0.02	0.6	0.04	30.96	3.53	-5.17	0.73	25.79	3.53	-17.01	2.8	2.37
	168	169	PHE	401	8.11	2.05	12.43	1.41	20.54	2.48	-3.06	0.77	-1.36	0.81	-4.42	1.22	0.99	0.49	-2.62	0.96	-1.63	1.1	6.04	2.42	8.45	1.65	14.49	2.96	-0.43	0.42	-2.17	0.52	-2.6	0.72	0.14	0.06	0.01	0.01	0.15	0.06	-0.29	0.4	-2.16	0.52	-2.45	0.71	5.75	2.3	6.29
	169	170	PRO	402	12.77	1.41	15.74	1.27	28.51	2.2	-3.38	0.59	-1.82	0.91	-5.2	1.19	-9.94	0.89	0.18	1.42	-9.76	1.27	-0.56	1.75	14.11	1.84	13.55	2.6	9.48	0.81	-10.92	0.77	-1.44	0.34	0.07	0.03	0	0	0.07	0.03	9.56	0.8	-10.92	0.77	-1.37	0.34	9	1.52	3.19
	170	171	ILE	403	9.41	1.78	12.41	1.19	21.82	2.22	-5.26	0.79	-1.63	0.9	-6.89	1.38	-6.99	0.28	3.5	1	-3.48	0.99	-2.83	2	14.28	1.51	11.45	2.68	5.01	0.24	-8.59	0.67	-3.58	0.66	0	0	0	0	0.01	0.01	5.01	0.24	-8.59	0.67	-3.57	0.66	2.18	2	5.7
	171	172	LYS	404	10.79	2.3	10.19	1.21	20.98	2.68	-4.3	0.8	-1.99	0.56	-6.29	0.95	-63.46	4.15	-3.56	0.93	-67.02	4.14	-56.97	4.66	4.64	1.21	-52.33	4.51	38.67	4.06	-4.98	0.58	33.7	4.1	0.17	0.04	0	0.01	0.18	0.04	38.85	4.03	-4.97	0.58	33.87	4.08	-18.13	2.6	-0.33
	172	173	TRP	405	11.14	2.33	9.92	1.45	21.07	2.76	-8.39	0.78	-1.95	0.84	-10.34	1.2	0.17	0.69	-10.11	1.01	-9.94	1.24	2.93	2.59	-2.14	1.25	0.79	2.96	2.07	0.43	-4.49	0.51	-2.41	0.59	0.08	0.02	0.02	0.01	0.1	0.02	2.16	0.43	-4.47	0.5	-2.31	0.58	5.08	2.56	-6.61
	173	174	THR	406	6.41	1.73	10.04	1.07	16.45	2.16	-3.51	0.78	-1.95	0.65	-5.47	1.08	-25.92	1.29	-6.45	1.11	-32.37	1.99	-23.02	2.11	1.64	1.15	-21.38	2.59	3.05	0.79	-7	0.85	-3.94	1.43	0.01	0.01	0.04	0.01	0.04	0.01	3.06	0.79	-6.96	0.85	-3.9	1.42	-19.96	1.82	-5.32
	174	175	ALA	407	2.58	0.75	11	1.22	13.58	1.57	-2.29	0.39	-2.52	0.62	-4.82	0.69	2.44	0.13	2.13	0.98	4.57	1	2.73	0.86	10.6	1.42	13.33	1.68	-0.23	0.05	-0.89	0.48	-1.12	0.5	0	0	0.01	0.01	0.01	0.01	-0.23	0.05	-0.88	0.48	-1.11	0.5	2.5	0.86	9.72
	175	176	PRO	408	12.29	1.23	14.11	1.14	26.4	1.75	-4.47	0.62	-2.72	0.72	-7.19	0.84	-14.11	0.77	2.39	1.33	-11.71	1.13	-6.29	1.64	13.79	1.66	7.5	2.2	13.15	0.71	-14.42	0.96	-1.27	0.68	0.02	0.02	0.01	0.01	0.03	0.02	13.18	0.7	-14.41	0.96	-1.24	0.68	6.89	1.47	-0.62
	176	177	GLU	409	7.73	1.71	10.53	1.24	18.26	2.05	-2.31	1.31	-2.21	0.85	-4.52	1.76	-13.13	4.1	-8.14	1.04	-21.27	4.31	-7.71	3.92	0.18	1.54	-7.53	4.35	-50.66	3.09	-5.95	0.68	-56.61	3.31	0.08	0.03	0.01	0.01	0.09	0.04	-50.58	3.08	-5.94	0.68	-56.53	3.31	-58.29	2.11	-5.77
	177	178	SER	410	3.65	0.93	10.84	1.3	14.49	1.73	-2.16	0.67	-2.57	0.8	-4.73	1.08	-7.29	0.87	-5.74	0.94	-13.03	1.2	-5.8	1.18	2.53	1.68	-3.27	2.16	1.68	0.34	-4.31	0.8	-2.62	0.75	0	0	0	0.01	0.01	0.01	1.69	0.34	-4.3	0.79	-2.62	0.75	-4.11	1.09	-1.77
	178	179	LEU	411	9.14	2.09	11.85	1.36	21	2.61	-2.87	0.92	-1.42	0.79	-4.29	1.46	-29.19	0.4	-0.65	0.88	-29.83	0.92	-22.92	2.17	9.79	1.25	-13.13	2.64	5.23	0.31	-8.94	0.63	-3.71	0.64	0.16	0.06	0.12	0.02	0.28	0.06	5.39	0.29	-8.81	0.62	-3.43	0.63	-17.53	2.16	0.97
	179	180	ALA	412	2.66	0.79	11.49	1.28	14.14	1.5	-1.22	0.31	-1.02	0.64	-2.24	0.73	2.35	0.14	-6.7	1.01	-4.35	1.06	3.78	0.89	3.77	1.56	7.56	1.89	-0.23	0.1	-4.77	0.59	-5	0.65	0.14	0.05	0.26	0.02	0.41	0.06	-0.08	0.1	-4.51	0.58	-4.59	0.63	3.7	0.87	-0.74
	180	181	TYR	413	8.64	1.85	9.98	1.42	18.63	2.5	0.68	0.69	0.15	0.77	0.82	1.13	-16.84	0.82	-5.7	0.87	-22.54	1.04	-7.52	2.05	4.43	1.36	-3.09	2.4	-5.96	0.85	-3.66	0.81	-9.62	0.98	1.02	0.12	0.19	0.03	1.21	0.12	-4.94	0.78	-3.47	0.8	-8.41	0.92	-12.46	1.9	0.96
	181	182	ASN	414	11.77	1.89	10.71	1.33	22.48	2.5	-0.53	0.59	-0.55	0.76	-1.08	1.1	-76.36	1.52	-3.96	1.66	-80.32	1.69	-65.12	1.87	6.2	2.04	-58.93	2.67	-10.51	1.2	-1.32	1.25	-11.83	1.21	0.76	0.06	0.1	0.02	0.86	0.07	-9.75	1.17	-1.22	1.24	-10.97	1.19	-74.87	1.48	4.98
	182	183	LYS	415	11.33	2.27	9.89	1.4	21.23	2.79	-1.63	0.67	-0.77	0.92	-2.4	1.1	-19.43	2.96	-3.47	1.1	-22.9	3.34	-9.73	4.27	5.65	1.46	-4.07	4.8	-7.58	3.12	-5.45	0.57	-13.03	3.36	0.97	0.08	0.04	0.01	1	0.08	-6.61	3.1	-5.42	0.57	-12.03	3.35	-16.34	2.49	0.23
	183	184	PHE	416	7.85	1.73	9.89	1.27	17.74	2.19	-2.29	0.81	-1.14	0.61	-3.44	1.03	-0.37	0.57	-11.04	1.17	-11.41	1.27	5.18	2.01	-2.29	1.79	2.89	2.79	0.26	0.41	-2.87	1.04	-2.61	1.08	0.26	0.1	0.18	0.03	0.44	0.1	0.52	0.37	-2.69	1.02	-2.17	1.05	5.7	1.97	-4.98
	184	185	SER	417	3.11	0.99	9.8	1.21	12.9	1.56	-1.03	0.61	-1.14	1.03	-2.17	1.15	-2.33	1.6	-4.57	1.23	-6.89	2.19	-0.25	1.65	4.09	1.54	3.84	2.27	-2.57	1.14	-4.91	0.69	-7.48	1.54	0.27	0.04	0.02	0.01	0.29	0.04	-2.31	1.15	-4.89	0.69	-7.19	1.55	-2.55	1.23	-0.8
	185	186	ILE	418	9.65	2.02	11.15	1.41	20.79	2.36	-1.98	0.9	-1.09	0.75	-3.07	1.24	-7.24	0.42	5.9	1.16	-1.33	1.23	0.43	2.12	15.96	1.61	16.39	2.51	5.01	0.35	-9.41	0.86	-4.4	0.96	0.28	0.05	0	0	0.29	0.05	5.3	0.36	-9.41	0.86	-4.11	0.94	5.73	2.13	6.55
	186	187	LYS	419	11.89	2.14	10.64	1.31	22.54	2.59	-4.2	0.98	-1.19	0.92	-5.39	1.37	-69.24	5.77	-8.77	0.99	-78.01	5.77	-61.55	6.11	0.68	1.5	-60.87	6.42	44.3	5.22	-3.85	0.48	40.45	5.29	0.31	0.04	0	0	0.31	0.04	44.61	5.2	-3.85	0.48	40.76	5.28	-16.93	2.26	-3.18
	187	188	SER	420	3.58	0.94	10.87	1.35	14.45	1.81	-2.24	0.85	-2.65	0.81	-4.89	1.22	-11.89	1.5	-12.73	0.95	-24.62	1.83	-10.55	1.4	-4.51	1.56	-15.06	2.2	4.6	0.37	-5.6	0.58	-1	0.55	0.02	0.01	0.02	0.01	0.04	0.01	4.61	0.36	-5.58	0.58	-0.96	0.55	-5.93	1.28	-10.09
	188	189	ASP	421	4.45	1.2	10.9	1.52	15.35	2.11	-4.11	0.72	-2.1	0.83	-6.22	1.15	12.98	3.04	-0.06	0.87	12.92	3.23	13.32	3.04	8.73	1.58	22.05	3.57	-69.43	2.75	-10.36	0.45	-79.8	2.97	0.01	0.01	0	0	0.01	0.01	-69.42	2.75	-10.36	0.45	-79.78	2.97	-56.1	1.45	-1.63
	189	190	VAL	422	6.33	1.78	11.12	1.31	17.45	2.24	-3.71	0.72	-1.72	0.84	-5.43	1.07	-22.24	0.36	-5.01	1	-27.25	1.02	-19.62	1.86	4.39	1.43	-15.23	2.3	7.34	0.26	-8.61	0.44	-1.27	0.43	0	0	0	0	0	0	7.34	0.26	-8.61	0.44	-1.27	0.43	-12.28	1.86	-4.22
	190	191	TRP	423	10.51	1.96	10.83	1.2	21.34	2.4	-10.45	0.66	-3.68	0.68	-14.13	0.98	5.74	0.83	-9.69	0.96	-3.95	1.15	5.79	2.19	-2.53	1.38	3.26	2.56	0.49	0.59	-2.64	0.43	-2.15	0.58	0.03	0.02	0	0	0.03	0.02	0.52	0.59	-2.64	0.43	-2.12	0.58	6.32	2.08	-5.18
	191	192	ALA	424	2.79	0.87	10.95	1.06	13.74	1.49	-1.82	0.43	-3.46	0.82	-5.28	0.98	2.11	0.12	-9.45	0.92	-7.33	0.93	3.08	1.02	-1.96	1.29	1.12	1.85	-0.16	0.05	-0.03	0.35	-0.19	0.36	0.02	0.01	0	0	0.02	0.01	-0.14	0.05	-0.03	0.35	-0.17	0.36	2.94	1.02	-1.99
	192	193	PHE	425	7.44	1.71	9.97	1.19	17.41	2.17	-4.9	0.56	-2.56	0.87	-7.46	1.04	0.08	0.22	-8.6	1.06	-8.52	1.11	2.62	1.74	-1.18	1.4	1.43	2.33	0.65	0.18	-1.99	0.32	-1.34	0.35	0	0	0	0	0	0	0.65	0.18	-1.99	0.32	-1.33	0.34	3.27	1.75	-3.17
	193	194	GLY	426	0	0	9.34	1.4	9.34	1.4	0	0	-5.52	0.69	-5.52	0.69	0	0	-8.31	0.83	-8.31	0.83	0	0	-4.5	1.33	-4.5	1.33	0	0	-0.77	0.38	-0.77	0.38	0	0	0	0	0	0	0	0	-0.77	0.38	-0.77	0.38	0	0	-5.27
	194	195	VAL	427	6.33	1.69	10.63	1.3	16.96	2.32	-3.17	0.75	-1.8	0.94	-4.97	1.21	-22.11	0.39	-4.53	1.1	-26.64	1.07	-18.95	1.89	4.3	1.38	-14.65	2.14	6.81	0.28	-8.15	0.58	-1.34	0.44	0.01	0.01	0	0	0.01	0.01	6.81	0.28	-8.15	0.58	-1.33	0.44	-12.13	1.86	-3.85
	195	196	LEU	428	9.49	1.96	12.03	1.33	21.52	2.57	-4.07	0.98	-2.33	0.83	-6.39	1.3	-28.85	0.38	-2.25	0.88	-31.1	0.91	-23.43	2.2	7.45	1.55	-15.98	2.76	4.99	0.21	-6.25	0.39	-1.26	0.33	0	0	0	0	0	0	4.99	0.21	-6.25	0.39	-1.26	0.33	-18.44	2.19	1.2
	196	197	LEU	429	9.1	1.92	11.6	1.36	20.7	2.55	-3.91	0.87	-2.57	0.84	-6.48	1.29	-28.44	0.36	-4.67	0.91	-33.11	1.02	-23.25	2.2	4.36	1.63	-18.89	2.83	4.87	0.18	-5.91	0.44	-1.05	0.42	0.01	0.01	0	0	0.01	0.01	4.88	0.18	-5.91	0.44	-1.03	0.42	-18.37	2.18	-1.55
	197	198	TRP	430	10.88	2.02	11.07	1.13	21.94	2.32	-9.79	0.68	-3.99	0.72	-13.78	1	3.89	0.83	-12.45	1.38	-8.56	1.48	4.98	2.19	-5.38	1.64	-0.39	2.63	1.29	0.42	-2.76	0.46	-1.47	0.69	0.08	0.03	0	0	0.08	0.03	1.36	0.42	-2.76	0.46	-1.4	0.69	6.34	2.17	-8.14
	198	199	GLU	431	6.43	1.71	11.21	1.27	17.63	2.18	-5.58	0.71	-2.98	0.73	-8.56	1.03	24.72	3.3	-2.63	1.16	22.08	3.93	25.56	3.47	5.59	1.63	31.15	4.1	-78.2	3.18	-9.23	0.68	-87.43	3.56	0.02	0.01	0	0	0.02	0.01	-78.18	3.18	-9.23	0.68	-87.41	3.56	-52.61	1.78	-3.65
	199	200	ILE	432	9.03	1.76	12.07	1.46	21.1	2.42	-3.39	0.99	-1.62	0.74	-5.01	1.28	-8.06	0.3	-3.84	0.97	-11.9	0.89	-2.41	1.99	6.61	1.67	4.19	2.49	6.26	0.26	-7.69	0.71	-1.43	0.58	0.01	0.01	0	0	0.01	0.01	6.27	0.26	-7.69	0.71	-1.42	0.58	3.85	1.91	-1.08
	200	201	ALA	433	2.77	0.86	10.62	1.4	13.39	1.72	-1.83	0.42	-3	0.72	-4.83	0.8	2.38	0.15	-10.71	1.19	-8.32	1.22	3.32	0.91	-3.08	1.38	0.24	1.78	-0.36	0.08	0.57	0.88	0.21	0.93	0	0	0	0	0	0	-0.36	0.08	0.57	0.88	0.21	0.93	2.97	0.91	-2.51
	201	202	THR	434	6.66	1.48	10.01	1.58	16.67	2.14	-2.94	0.9	-0.63	0.87	-3.56	1.4	-26.76	1.28	-9.17	1.41	-35.93	1.37	-23.03	1.97	0.21	2.14	-22.82	2.55	2.26	0.58	-5.19	1.03	-2.94	0.93	0.09	0.04	0.06	0.03	0.15	0.05	2.34	0.57	-5.13	1.02	-2.79	0.92	-20.69	1.78	-4.92
	202	203	TYR	435	8.5	2.03	9.37	1.24	17.87	2.52	-3.73	0.77	-2	0.74	-5.72	1.09	-17.87	0.79	-3.76	1.05	-21.63	1.27	-13.09	2.17	3.61	1.6	-9.48	2.76	-2.33	0.71	-4.92	0.93	-7.25	1	0.1	0.04	0.03	0.02	0.13	0.04	-2.23	0.7	-4.89	0.93	-7.12	0.98	-15.33	2.2	-1.27
	203	204	GLY	436	0	0	10.32	1.75	10.32	1.75	0	0	-2.56	0.84	-2.56	0.84	0	0	-16.02	1.98	-16.02	1.98	0	0	-8.27	2.48	-8.27	2.48	0	0	1.23	0.95	1.23	0.95	0	0	0.02	0.02	0.02	0.02	0	0	1.25	0.94	1.25	0.94	0	0	-7.02
	204	205	MET	437	7.64	1.72	9.69	1.21	17.32	2.16	-2.3	0.81	-1.35	0.73	-3.65	1.15	-2.57	1.12	-0.6	1.35	-3.16	1.83	2.77	2.49	7.74	1.72	10.51	3.38	1.56	0.88	-8.45	0.76	-6.9	1.26	0.8	0.1	0.03	0.02	0.84	0.1	2.36	0.84	-8.42	0.76	-6.06	1.23	5.13	2.11	-0.68
	205	206	SER	438	3.52	0.88	12.26	1.57	15.78	1.94	-0.98	0.29	-0.35	0.59	-1.33	0.65	-3.18	0.83	4.28	1.03	1.1	1.42	-0.64	1.28	16.2	1.88	15.55	2.59	-1.71	0.72	-6.69	0.91	-8.4	1.12	0.4	0.05	0.05	0.02	0.45	0.06	-1.32	0.7	-6.64	0.9	-7.95	1.1	-1.96	1.08	9.56
	206	207	PRO	439	12.61	1.59	13.22	1.14	25.83	2.21	-3.94	0.54	-1.6	0.97	-5.54	1.08	-12.07	0.96	0.3	2.06	-11.77	1.81	-3.4	1.97	11.92	2.08	8.53	2.33	11.33	0.83	-10.66	1.23	0.67	0.88	0.02	0.02	0	0	0.02	0.02	11.35	0.84	-10.66	1.23	0.69	0.88	7.95	1.65	1.26
	207	208	TYR	440	8.89	2.27	12.62	1.4	21.51	2.88	-3.93	0.78	-0.95	0.86	-4.87	1.32	-17.87	0.51	3.69	1.03	-14.18	1.1	-12.91	2.37	15.37	1.48	2.46	3.02	-2.02	0.43	-4.6	0.74	-6.62	0.79	0.05	0.02	0.02	0.01	0.06	0.02	-1.97	0.42	-4.59	0.73	-6.56	0.79	-14.88	2.31	10.78
	208	209	PRO	441	12.21	1.49	12.23	1.07	24.45	1.97	-1.76	0.63	-0.38	0.67	-2.14	0.95	-11.35	0.71	8.24	1.07	-3.11	0.78	-0.9	1.84	20.09	1.49	19.19	2.31	10.63	0.66	-16.39	0.92	-5.76	0.7	0.4	0.08	0.12	0.02	0.52	0.09	11.03	0.66	-16.27	0.92	-5.24	0.69	10.13	1.62	3.82
	209	210	GLY	442	0	0	9.49	1.54	9.49	1.54	0	0	-0.69	0.38	-0.69	0.38	0	0	-5.3	0.77	-5.3	0.77	0	0	3.49	1.64	3.49	1.64	0	0	-7.08	0.47	-7.08	0.47	0	0	0.69	0.02	0.69	0.02	0	0	-6.39	0.47	-6.39	0.47	0	0	-2.9
	210	211	ILE	443	9.76	1.89	9.38	1.18	19.14	2.44	-1.81	0.99	0.88	0.72	-0.93	1.39	-7.52	0.37	-3.74	0.79	-11.26	0.9	0.43	2.02	6.52	1.49	6.95	2.6	5.46	0.33	-8.93	0.67	-3.48	0.74	0.23	0.06	0.13	0.03	0.36	0.06	5.69	0.34	-8.81	0.65	-3.12	0.73	6.11	2	-2.29
	211	212	ASP	444	4.19	1.46	9.73	1.11	13.92	1.86	-0.28	1.08	-0.57	0.8	-0.85	1.38	18.94	4.99	0.23	1.35	19.17	5.23	22.85	4.8	9.39	1.61	32.24	5.42	-85.7	4.13	-10.52	0.7	-96.22	4.25	0.55	0.05	0.09	0.02	0.64	0.05	-85.15	4.11	-10.42	0.69	-95.58	4.23	-62.31	1.69	-1.03
	212	213	LEU	445	8.76	1.78	11.5	1.45	20.25	2.34	-1.38	0.91	-1.34	0.79	-2.71	1.38	-28.53	0.41	-2.3	0.85	-30.83	0.9	-21.15	1.91	7.86	1.52	-13.29	2.49	4.46	0.3	-6.24	0.51	-1.77	0.6	0.31	0.09	0.04	0.02	0.35	0.09	4.78	0.32	-6.2	0.51	-1.42	0.58	-16.37	1.89	1.66
	213	214	SER	446	3.59	1.03	10.55	1.53	14.14	2.01	-0.11	0.99	-1.35	0.8	-1.46	1.27	-8.59	2.87	-9.43	1.32	-18.02	3.34	-5.12	2.38	-0.23	1.72	-5.34	2.99	1.21	1.43	-5.05	1.02	-3.84	1.76	0.33	0.06	0.05	0.03	0.37	0.08	1.53	1.42	-5	1	-3.47	1.73	-3.58	1.31	-5.23
	214	215	GLN	447	14.14	2.26	10.49	1.23	24.63	2.7	-2.37	0.71	-0.93	0.88	-3.3	1.24	-66.05	2.38	-6.29	1.13	-72.34	2.72	-54.28	2.6	3.27	1.62	-51.01	3.36	-8.08	1.76	-3.1	0.6	-11.17	1.98	0.57	0.11	0.02	0.02	0.59	0.11	-7.5	1.78	-3.08	0.6	-10.58	1.99	-61.78	1.97	0.19
	215	216	VAL	448	6.63	1.98	11	1.53	17.62	2.79	-3.36	0.86	-1.43	0.83	-4.79	1.27	-21.7	0.44	-5.47	1.04	-27.17	1.15	-18.43	2.11	4.1	1.74	-14.33	2.74	6.62	0.29	-9.04	0.55	-2.42	0.5	0	0	0	0	0	0	6.62	0.29	-9.04	0.55	-2.42	0.5	-11.81	2.1	-4.94
	216	217	TYR	449	9.17	2.08	11.08	1.43	20.26	2.47	-4.7	0.93	-2.15	0.76	-6.85	1.34	-21.4	1.88	-5.32	0.95	-26.72	2.13	-16.93	2.77	3.62	1.72	-13.31	3.37	0.22	0.84	-6.81	0.91	-6.59	1.2	0.12	0.04	0.02	0.02	0.14	0.04	0.35	0.82	-6.79	0.9	-6.44	1.19	-16.58	2.41	-3.17
	217	218	GLU	450	6.58	1.8	10.98	1.27	17.56	2.52	-1.21	0.79	-1.37	0.89	-2.58	1.31	24.21	8.28	1.32	1.36	25.54	8.69	29.58	8.06	10.94	1.69	40.52	8.33	-88.14	7.8	-10.46	0.78	-98.6	8.12	0.57	0.09	0.02	0.01	0.6	0.1	-87.57	7.74	-10.43	0.77	-98	8.05	-57.99	1.7	0.5
	218	219	LEU	451	9.05	1.96	11.01	1.4	20.06	2.5	-2.61	0.96	-2.13	0.86	-4.73	1.37	-28.03	0.41	-0.35	1.03	-28.38	1.14	-21.59	2.15	8.54	1.62	-13.05	2.81	4.53	0.26	-7.08	0.59	-2.56	0.58	0.19	0.05	0	0	0.19	0.05	4.72	0.28	-7.08	0.59	-2.37	0.58	-16.88	2.12	1.46
	219	220	LEU	452	8.73	1.71	11.05	1.4	19.78	2.54	-4.1	0.87	-1.37	0.88	-5.47	1.35	-29.5	0.34	-4.95	0.78	-34.45	0.84	-24.87	2	4.73	1.4	-20.14	2.65	5.45	0.23	-7.23	0.52	-1.78	0.58	0.01	0.01	0.01	0.01	0.01	0.02	5.46	0.23	-7.22	0.52	-1.76	0.58	-19.42	1.95	-2.49
	220	221	GLU	453	6.19	1.73	10.89	1.65	17.08	2.45	-1.61	0.74	-0.94	0.81	-2.55	1.18	49.03	3.25	6.1	1.13	55.12	3.58	53.61	3.44	16.04	1.91	69.65	4.06	-111.19	3.01	-13.29	0.82	-124.48	3.44	0.69	0.1	0.13	0.03	0.82	0.09	-110.5	3.03	-13.16	0.81	-123.66	3.44	-56.89	1.63	2.88
	221	222	LYS	454	10.78	1.93	10.52	1.44	21.3	2.5	-0.51	0.93	0.4	0.76	-0.11	1.39	-69.49	9.08	-7.82	1.21	-77.31	8.86	-59.23	9.25	3.1	1.51	-56.12	9.15	39.93	8.08	-5.34	0.78	34.59	7.68	0.89	0.07	0.2	0.03	1.1	0.06	40.83	8.03	-5.14	0.77	35.69	7.64	-18.4	2.32	-2.03
	222	223	ASP	455	4.54	1.69	11.07	1.6	15.61	2.49	-0.16	0.9	-0.87	0.71	-1.03	1.26	19.17	3.5	-1.49	1.91	17.68	4.17	23.55	4.19	8.71	2.29	32.26	5.09	-85.55	3.89	-16.15	1.37	-101.7	4.56	0.41	0.08	0.1	0.02	0.52	0.09	-85.13	3.85	-16.05	1.36	-101.19	4.52	-61.59	1.62	-7.34
	223	224	TYR	456	8.76	1.91	9.81	1.25	18.57	2.28	-1.87	0.82	-0.71	0.74	-2.58	1.21	-17.06	0.65	0.19	1.17	-16.88	1.29	-10.17	2.17	9.29	1.54	-0.88	2.72	-4.46	0.6	-4.7	0.61	-9.16	0.77	0.54	0.1	0.06	0.02	0.6	0.1	-3.92	0.54	-4.64	0.6	-8.56	0.74	-14.09	2.12	4.65
	224	225	ARG	457	13.49	2.9	10.33	1.27	23.82	3.07	-3.29	1.33	-0.93	0.67	-4.22	1.63	-257.48	6.07	1.1	0.69	-256.38	5.83	-247.28	6.1	10.49	1.37	-236.79	6.1	65.61	5.04	-8.59	0.65	57.02	4.8	0.33	0.06	0.14	0.03	0.47	0.07	65.95	5.04	-8.46	0.64	57.49	4.8	-181.34	2.76	2.04
	225	226	MET	458	7.11	1.86	9.79	1.29	16.9	2.56	-6.16	0.69	-0.62	0.86	-6.79	1.18	-3.07	0.45	-11.98	1.33	-15.05	1.32	-2.12	1.92	-2.81	1.55	-4.93	2.59	2.49	0.29	-5.62	0.98	-3.13	0.87	0.02	0.01	0.02	0.01	0.04	0.02	2.51	0.29	-5.6	0.97	-3.09	0.87	0.39	1.88	-8.41
	226	227	GLU	459	6.54	1.92	10.24	1.33	16.78	2.36	-0.75	0.71	-1.11	0.61	-1.86	1.07	36.38	5.29	2.2	1.07	38.58	5.14	42.17	5.91	11.33	1.52	53.5	6	-98.38	5.35	-6.94	0.83	-105.32	5.11	0.92	0.04	0.07	0.02	0.98	0.05	-97.46	5.33	-6.88	0.83	-104.34	5.09	-55.29	1.7	4.45
	227	228	ARG	460	13.91	2.5	12.22	1.49	26.13	3.06	-3.45	1.5	0.02	0.9	-3.43	1.89	-236.98	6.14	8.9	1.34	-228.08	6.25	-226.52	6.25	21.14	1.69	-205.38	6.38	49.95	5.28	-7.25	0.89	42.7	5.03	0.75	0.17	0.08	0.03	0.83	0.18	50.7	5.2	-7.17	0.9	43.53	4.95	-175.82	2.81	13.97
	228	229	PRO	461	12.2	1.39	13.38	1.27	25.57	2.18	-3.85	0.65	-1.86	0.79	-5.7	1.07	-12.93	0.74	4.31	1.92	-8.62	1.85	-4.58	1.62	15.83	2.5	11.25	3.01	12.19	0.7	-15.66	1.71	-3.46	1.64	0.01	0.01	0.06	0.02	0.07	0.02	12.2	0.7	-15.6	1.7	-3.4	1.63	7.62	1.44	0.23
	229	230	GLU	462	6.17	1.67	9.89	1.42	16.06	2.3	-0.19	0.81	-0.31	0.63	-0.5	1.07	34.48	10.93	2.09	1.56	36.57	11.08	40.46	10.42	11.68	2	52.13	10.37	-98.27	10.61	-12.85	1.34	-111.11	10.75	0.92	0.12	0.21	0.04	1.13	0.12	-97.34	10.52	-12.64	1.32	-109.99	10.67	-56.89	1.53	-0.97
	230	231	GLY	463	0	0	9.19	1.55	9.19	1.55	0	0	-1.82	0.65	-1.82	0.65	0	0	-9.89	1.31	-9.89	1.31	0	0	-2.52	2.01	-2.52	2.01	0	0	-2.37	1.07	-2.37	1.07	0	0	0.11	0.07	0.11	0.07	0	0	-2.26	1.03	-2.26	1.03	0	0	-4.78
	231	232	CYS	464	3.4	1.2	10.6	1.32	14	1.8	-3.15	0.57	0.24	0.85	-2.91	0.99	6.77	0.88	2.87	2.58	9.64	2.88	7.02	1.34	13.71	2.51	20.73	2.87	-2.07	0.46	-2.99	1.61	-5.07	1.66	0.02	0.01	0.04	0.03	0.06	0.03	-2.05	0.46	-2.95	1.6	-5.01	1.65	4.97	1.24	10.76
	232	233	PRO	465	11.99	1.51	12.66	1.09	24.65	1.92	-1.55	0.53	-0.94	0.84	-2.5	1.05	-9.72	0.96	2.1	1.33	-7.63	1.67	0.72	1.89	13.81	1.55	14.53	2.5	9.39	0.93	-13.2	0.97	-3.81	1.22	0.44	0.08	0.08	0.02	0.52	0.08	9.84	0.93	-13.13	0.97	-3.29	1.2	10.55	1.55	0.68
	233	234	GLU	466	6.39	2.1	11.03	1.73	17.42	2.8	-1.06	0.76	-0.64	1.13	-1.7	1.45	33.18	6.23	4.11	1.64	37.29	6.9	38.51	6.35	14.5	1.89	53.01	6.81	-96.18	6.06	-10.39	1.04	-106.56	6.45	0.69	0.1	0.05	0.03	0.74	0.09	-95.49	6.01	-10.34	1.03	-105.83	6.41	-56.98	2.07	4.16
	234	235	LYS	467	11.83	2.3	10.96	1.41	22.79	2.67	-1.67	0.93	-1.44	0.69	-3.12	1.21	-70.91	9.93	-1.08	1.29	-71.99	10.31	-60.75	10.05	8.43	1.68	-52.32	10.53	42.36	8.79	-6.32	0.96	36.04	9	0.73	0.09	0.03	0.03	0.76	0.09	43.08	8.75	-6.29	0.94	36.8	8.96	-17.66	2.64	2.14
	235	236	VAL	468	6.25	1.64	10.94	1.3	17.19	2.19	-2.34	0.67	-0.71	0.99	-3.05	1.19	-21.73	0.47	-10.07	1.09	-31.8	1.16	-17.83	1.84	0.17	1.5	-17.66	2.4	6.44	0.3	-8.26	0.53	-1.82	0.56	0.03	0.02	0	0	0.03	0.02	6.47	0.31	-8.26	0.53	-1.79	0.56	-11.35	1.79	-8.1
	236	237	TYR	469	8.59	2.04	11.12	1.38	19.71	2.51	-4.59	0.87	-2.26	0.86	-6.85	1.17	-22.58	1.2	-11.66	0.95	-34.25	1.69	-18.58	2.15	-2.8	1.49	-21.39	2.69	-0.65	0.59	-2.15	0.64	-2.8	1.04	0.17	0.05	0	0	0.17	0.05	-0.48	0.59	-2.15	0.64	-2.63	1.04	-19.06	2.13	-4.96
	237	238	GLU	470	6.5	1.76	10.89	1.27	17.39	2.34	-1.59	1.02	-1.61	0.81	-3.2	1.27	31.22	11.98	-0.1	1.2	31.12	11.97	36.14	11.58	9.17	1.58	45.31	11.87	-93.62	11.53	-10.2	1.05	-103.82	11.61	0.57	0.13	0.04	0.02	0.61	0.13	-93.05	11.43	-10.16	1.04	-103.21	11.52	-56.91	1.72	-0.99
	238	239	LEU	471	9.1	2.05	11.56	1.46	20.66	2.62	-3.43	0.9	-1.77	0.85	-5.2	1.33	-29.07	0.38	-3.21	1.02	-32.28	1.05	-23.39	2.28	6.58	1.68	-16.81	2.9	5.21	0.22	-6.28	0.4	-1.07	0.4	0.06	0.04	0.01	0.01	0.08	0.04	5.27	0.22	-6.26	0.4	-0.99	0.4	-18.12	2.31	0.31
	239	240	MET	472	8.2	1.87	11.59	1.18	19.78	2.33	-7.56	0.79	-3.15	0.81	-10.71	1.06	-3.53	0.43	-0.93	0.97	-4.46	0.93	-2.89	1.89	7.51	1.36	4.62	2.55	3.43	0.23	-4.33	0.47	-0.9	0.48	0	0	0	0	0	0	3.43	0.23	-4.33	0.47	-0.9	0.48	0.53	1.91	3.18
	240	241	ARG	473	13.64	2.76	11.48	1.4	25.12	3.01	-3.01	1.11	-2.33	0.69	-5.34	1.38	-237.64	14.27	-6.62	1.76	-244.26	14.46	-227.01	13.62	2.52	1.96	-224.49	13.85	48.8	11.56	-4.01	1.14	44.79	11.7	0.82	0.09	0.02	0.02	0.84	0.09	49.62	11.5	-3.99	1.13	45.63	11.65	-177.39	3.2	-1.47
	241	242	ALA	474	2.68	0.76	10.89	1.22	13.57	1.57	-1.36	0.27	-2.5	0.63	-3.86	0.66	2.32	0.14	-13.2	0.85	-10.89	0.86	3.64	0.81	-4.81	1.41	-1.18	1.79	-0.2	0.07	-0.22	0.57	-0.43	0.58	0.2	0.04	0.04	0.02	0.23	0.04	-0.01	0.08	-0.19	0.56	-0.2	0.57	3.63	0.83	-5
	242	243	CYS	475	3.3	0.96	10.57	1.25	13.87	1.72	-4.05	0.48	-3.55	0.69	-7.61	0.83	5.8	0.54	-9.61	0.84	-3.8	0.96	5.05	1.14	-2.59	1.38	2.46	2	-1.77	0.19	1.32	0.44	-0.45	0.49	0	0	0	0	0	0	-1.77	0.19	1.32	0.44	-0.45	0.49	3.28	1.11	-1.27
	243	244	TRP	476	11.28	2.21	10.55	1.43	21.83	2.66	-9.89	0.73	-1.59	0.96	-11.48	1.25	6.42	0.7	-9.64	2.46	-3.21	2.39	7.82	2.42	-0.68	2.32	7.14	3.08	1.01	0.38	-2.4	1.36	-1.39	1.44	0.03	0.01	0	0	0.04	0.01	1.04	0.38	-2.39	1.36	-1.35	1.44	8.86	2.39	-3.07
	244	245	GLN	477	13.95	1.95	10.13	1.23	24.08	2.21	-3.02	0.77	-1.42	0.91	-4.44	1.27	-71.19	4.16	-8.59	1.12	-79.78	4.07	-60.26	3.95	0.12	1.59	-60.14	4.14	-4.2	2.87	-1.7	0.51	-5.9	2.78	0.5	0.06	0	0	0.5	0.06	-3.7	2.88	-1.7	0.51	-5.4	2.78	-63.96	1.84	-1.58
	245	246	TRP	478	11.13	2.05	11.74	1.06	22.87	2.43	-3.76	1.03	-2.12	0.67	-5.88	1.31	10.09	0.74	-6.71	1.42	3.37	1.68	17.46	2.36	2.9	1.45	20.36	3.06	-5.21	0.73	-3.7	0.71	-8.91	1.05	0.74	0.11	0.04	0.01	0.78	0.11	-4.47	0.69	-3.66	0.71	-8.13	1.03	12.99	2.18	-0.76
	246	247	ASN	479	11.17	1.9	11.98	1.12	23.14	2.15	-1.92	0.62	-0.35	0.9	-2.27	1.22	-81.76	2.51	1.93	1.56	-79.83	3.39	-72.51	2.84	13.56	1.72	-58.95	3.77	-4.94	2.09	-4.1	0.75	-9.04	2.55	0.54	0.04	0.04	0.01	0.59	0.05	-4.4	2.07	-4.06	0.75	-8.46	2.54	-76.91	1.6	9.51
	247	248	PRO	480	12.28	1.74	14.03	1.29	26.31	2.26	-2.85	0.55	-2.48	0.82	-5.33	0.9	-8.05	1.09	-0.74	1.92	-8.79	1.76	1.38	2.23	10.81	2.2	12.19	2.89	7.63	0.98	-10.61	1.04	-2.97	0.96	0.28	0.06	0	0	0.29	0.06	7.92	1	-10.61	1.04	-2.69	0.98	9.29	1.99	0.2
	248	249	SER	481	3.67	1.16	10.48	1.39	14.14	1.99	-0.71	0.29	-0.36	0.81	-1.07	0.94	-3.36	0.86	-5.68	0.94	-9.04	1.4	-0.4	1.44	4.44	1.55	4.04	2.41	-1.62	0.7	-9.36	0.76	-10.98	1.06	0.51	0.03	0.22	0.04	0.73	0.04	-1.11	0.69	-9.14	0.75	-10.26	1.05	-1.52	1.22	-4.7
	249	250	ASP	482	4.44	1.61	10.42	1.41	14.85	2.15	-1.22	0.72	-0.72	0.68	-1.94	0.98	32.65	6.01	11.2	1.07	43.86	6.31	35.86	5.78	20.9	1.58	56.77	6.38	-97.86	5.61	-17.48	1	-115.34	5.98	0.51	0.05	0.16	0.02	0.67	0.05	-97.35	5.58	-17.32	0.99	-114.67	5.95	-61.49	1.52	3.59
	250	251	ARG	483	12.94	2.84	11.79	1.51	24.72	3.41	-7.53	1.71	-0.27	0.93	-7.8	1.81	-255.17	3.78	3.08	1.97	-252.09	4.06	-249.76	4.66	14.59	2.25	-235.17	5.32	61.19	3.08	-2.45	1.2	58.74	3.19	0	0	0.02	0.02	0.02	0.02	61.19	3.08	-2.43	1.19	58.76	3.19	-188.57	2.96	12.16
	251	252	PRO	484	12.14	1.38	12.94	1.04	25.08	1.88	-3.24	0.61	-2.34	0.62	-5.58	0.72	-16.05	0.8	3.54	1.39	-12.51	1.13	-7.15	1.77	14.14	1.78	6.99	2.11	15.43	0.72	-13.96	1.05	1.47	0.77	0.14	0.03	0.03	0.02	0.17	0.04	15.57	0.72	-13.93	1.05	1.63	0.75	8.42	1.51	0.21
	252	253	SER	485	3.3	0.94	9.64	1.1	12.93	1.58	-0.78	0.96	-1.9	0.84	-2.68	1.28	-9.47	2.56	-8.98	1.31	-18.45	2.91	-6.96	2.19	-1.24	1.7	-8.2	2.88	2.65	1.38	-4.78	0.58	-2.13	1.65	0.15	0.03	0	0	0.15	0.03	2.8	1.36	-4.78	0.58	-1.98	1.64	-4.16	1.33	-6.02
	253	254	PHE	486	8.09	1.94	11.09	1.61	19.19	2.48	-5.93	0.61	-2.36	0.85	-8.29	1.05	-0.61	0.3	-10.23	1.07	-10.84	1.1	1.55	2.01	-1.5	1.67	0.05	2.69	1.09	0.21	-2.18	0.46	-1.09	0.53	0	0	0	0	0	0	1.09	0.21	-2.18	0.46	-1.09	0.53	2.65	2	-3.68
	254	255	ALA	487	2.74	0.66	11.21	1.29	13.95	1.56	-1.12	0.23	-2.34	0.59	-3.46	0.62	2.45	0.18	-9.63	1.48	-7.19	1.52	4.07	0.71	-0.77	1.68	3.3	1.96	-0.53	0.14	-1.84	0.9	-2.38	0.98	0.23	0.04	0.03	0.02	0.25	0.06	-0.31	0.17	-1.81	0.89	-2.12	0.97	3.76	0.7	-2.58
	255	256	GLU	488	6.41	1.8	10.89	1.14	17.3	2.28	-1.16	1.2	-1.79	0.78	-2.95	1.53	34.67	5.21	2.2	1.15	36.87	5.49	39.93	5.01	11.29	1.5	51.22	5.46	-97.76	4.44	-12.12	0.65	-109.87	4.75	0.63	0.04	0.04	0.02	0.67	0.06	-97.12	4.43	-12.08	0.64	-109.2	4.74	-57.2	2.1	-0.79
	256	257	ILE	489	9.55	2.01	11.52	1.38	21.08	2.53	-3.59	1.07	-1.13	0.92	-4.72	1.54	-8.42	0.27	-0.63	1.21	-9.05	1.2	-2.46	2.09	9.76	1.66	7.3	2.72	6.84	0.23	-8.69	0.58	-1.85	0.55	0	0	0	0	0.01	0.01	6.84	0.24	-8.69	0.58	-1.85	0.55	4.39	2.06	1.07
	257	258	HIS	490	25.2	1.81	10.79	1.16	35.99	2.14	-5.25	0.72	-2.44	0.78	-7.69	1.16	-9.83	2.8	-5.69	1.35	-15.52	3.04	10.12	3.71	2.66	1.68	12.78	4.05	-5.04	2.47	-7.15	1.27	-12.2	2.94	0.43	0.08	0.01	0.02	0.45	0.08	-4.61	2.44	-7.14	1.26	-11.75	2.92	5.51	2.08	-4.48
	258	259	GLN	491	14.13	2.22	10.62	1.28	24.75	2.81	-1.63	0.63	-1.06	0.81	-2.69	1.05	-66.46	1.85	-10.22	1.31	-76.68	2.04	-53.96	2.88	-0.66	1.57	-54.62	3.31	-7.82	1.75	-3.99	0.63	-11.81	1.61	0.77	0.07	0.01	0.01	0.78	0.07	-7.06	1.72	-3.98	0.63	-11.03	1.57	-61.02	1.91	-4.64
	259	260	ALA	492	2.79	0.89	11.14	1.34	13.93	1.87	-1.59	0.33	-1.87	0.95	-3.46	1.03	2.38	0.12	-9.83	1.36	-7.44	1.35	3.59	1.01	-0.57	1.9	3.03	2.42	-0.3	0.06	-0.62	0.64	-0.92	0.67	0.07	0.04	0.01	0.01	0.08	0.05	-0.23	0.07	-0.61	0.64	-0.84	0.66	3.36	1.01	-1.17
	260	261	PHE	493	8.52	2.24	10.71	1.32	19.23	2.9	-3.58	0.75	-1.58	0.54	-5.16	0.99	0.15	0.3	-7.03	1.19	-6.88	1.24	5.09	2.4	2.11	1.61	7.19	3.14	0.81	0.19	-5.61	1.09	-4.8	1.12	0.05	0.03	0.11	0.04	0.15	0.05	0.86	0.19	-5.5	1.1	-4.64	1.13	5.94	2.41	-3.39
	261	262	GLU	494	6.16	1.84	10.51	1.53	16.67	2.3	-1.39	0.57	0.17	0.79	-1.22	1.06	58.98	4.21	4.24	1.33	63.22	4.64	63.76	4.25	14.92	1.81	78.68	4.64	-121.23	4.16	-15.72	1.05	-136.95	4.47	0.74	0.07	0.24	0.03	0.97	0.07	-120.5	4.15	-15.48	1.08	-135.98	4.47	-56.74	1.64	-0.56
	262	263	THR	495	6.44	1.31	11.03	1.69	17.47	2.14	-0.72	0.7	0.47	0.74	-0.25	1.15	-29.2	1.17	-6.96	1.21	-36.17	1.5	-23.48	1.68	4.53	1.75	-18.95	2.33	3.91	0.82	-8.43	0.73	-4.51	1	0.45	0.05	0.28	0.02	0.73	0.05	4.37	0.8	-8.15	0.74	-3.78	0.98	-19.12	1.36	-3.62
	263	264	MET	496	7.39	2.02	9.96	1.27	17.35	2.45	-2.73	1.04	0.64	0.95	-2.09	1.64	-3	0.7	-4.13	3.4	-7.12	3.33	1.66	2.52	6.47	3.51	8.13	4.16	2.17	0.66	-2.89	2.64	-0.71	2.52	0.66	0.2	0.13	0.06	0.79	0.22	2.83	0.65	-2.76	2.6	0.08	2.43	4.5	2.35	3.71
	264	265	PHE	497	8.8	2.31	6.48	1.22	15.28	2.78	-2.84	0.93	0.13	0.59	-2.72	1.21	52.37	14.42	-5.26	5.34	47.1	9.2	58.32	13.91	1.34	5.66	59.66	8.71	-184.56	13.29	65.59	5.02	-118.97	8.33	0.65	0.1	0.04	0.03	0.69	0.11	-183.91	13.25	65.63	5.03	-118.28	8.28	-125.59	2.31	66.97
=>>	LIGAND
	Number	Residue	Residue Name	Residue ID	SINT		BINT		TINT		SVDW		BVDW		TVDW		SELE		BELE		TELE		SGAS		BGAS		TGAS		SGB		BGB		TGB		SGBSUR		BGBSUR		TGBSUR		SGBSOL		BGBSOL		TGBSOL		SGBTOT		BGBTOT
	0	266	LIG	498	26.6	3.48	0	0	26.6	3.48	1.37	1.32	0	0	1.37	1.32	1.39	1.93	0	0	1.39	1.93	29.37	3.47	0	0	29.37	3.47	-66.57	1.63	0	0	-66.57	1.63	2.65	0.03	0	0	2.65	0.03	-63.92	1.63	0	0	-63.92	1.63	-34.55	3.24	0
=>>	DELTA
	Number	Residue	Residue Name	Residue ID	SINT		BINT		TINT		SVDW		BVDW		TVDW		SELE		BELE		TELE		SGAS		BGAS		TGAS		SGB		BGB		TGB		SGBSUR		BGBSUR		TGBSUR		SGBSOL		BGBSOL		TGBSOL		SGBTOT		BGBTOT
	0	1	ASP	233	0	0	0	0	0	0	0	0	0	0	0	0	-0.24	0.24	0	0.04	-0.25	0.22	-0.24	0.24	0	0.04	-0.25	0.22	0.24	0.24	0	0.04	0.24	0.21	0	0	0	0	0	0	0.24	0.24	0	0.04	0.24	0.21	0	0	0
	1	2	LYS	234	0	0	0	0	0	0	0	0	0	0	0	0	4.18	0.65	-0.09	0.03	4.09	0.64	4.18	0.65	-0.09	0.03	4.09	0.64	-4.13	0.65	0.09	0.03	-4.04	0.64	0	0	0	0	0	0	-4.13	0.65	0.09	0.03	-4.04	0.64	0.05	0.01	0
	2	3	TRP	235	0	0	0	0	0	0	0	0	0	0	0	0	0.12	0.03	-0.18	0.05	-0.05	0.05	0.12	0.03	-0.18	0.05	-0.05	0.05	-0.12	0.03	0.17	0.05	0.05	0.05	0	0	0	0	0	0	-0.12	0.03	0.17	0.05	0.05	0.05	0	0	0
	3	4	GLU	236	0	0	0	0	0	0	0	0	0	0	0	0	-5.12	1.2	-0.52	0.1	-5.64	1.28	-5.12	1.2	-0.52	0.1	-5.64	1.28	5.05	1.18	0.52	0.1	5.57	1.26	0	0	0	0	0	0	5.05	1.18	0.52	0.1	5.57	1.26	-0.06	0.01	-0.01
	4	5	MET	237	0	0	0	0	0	0	0	0	0	0	0	0	0.25	0.07	-0.33	0.09	-0.08	0.08	0.25	0.07	-0.33	0.09	-0.08	0.08	-0.25	0.07	0.33	0.09	0.08	0.08	0	0	0	0	0	0	-0.25	0.07	0.33	0.09	0.08	0.08	0	0	0
	5	6	GLU	238	0	0	0	0	0	0	0	0	0	0	0	0	-4.84	1.31	-0.63	0.15	-5.47	1.45	-4.84	1.31	-0.63	0.15	-5.47	1.45	4.78	1.3	0.62	0.15	5.4	1.43	0	0	0	0	0	0	4.78	1.3	0.62	0.15	5.4	1.43	-0.06	0.02	-0.01
	6	7	ARG	239	0	0	0	0	0	0	0	0	0	0	0	0	7.23	2.05	-0.28	0.12	6.95	1.96	7.23	2.05	-0.28	0.12	6.95	1.96	-7.14	2.02	0.28	0.12	-6.86	1.93	0	0	0	0	0	0	-7.14	2.02	0.28	0.12	-6.86	1.93	0.09	0.03	0
	7	8	THR	240	0	0	0	0	0	0	0	0	0	0	0	0	0.33	0.15	-0.32	0.12	0.02	0.08	0.33	0.15	-0.32	0.12	0.02	0.08	-0.33	0.14	0.31	0.12	-0.01	0.08	0	0	0	0	0	0	-0.33	0.14	0.31	0.12	-0.01	0.08	0	0	0
	8	9	ASP	241	0	0	0	0	0	0	0	0	0	0	0	0	-4.37	1.09	-0.75	0.2	-5.11	1.29	-4.37	1.09	-0.75	0.2	-5.11	1.29	4.31	1.07	0.74	0.2	5.05	1.27	0	0	0	0	0	0	4.31	1.07	0.74	0.2	5.05	1.27	-0.05	0.01	-0.01
	9	10	ILE	242	0	0	0	0	0	0	0	0	0	0	0	0	0.51	0.14	-0.59	0.21	-0.08	0.1	0.51	0.14	-0.59	0.21	-0.08	0.1	-0.51	0.14	0.59	0.21	0.08	0.1	0	0	0	0	0	0	-0.51	0.14	0.59	0.21	0.08	0.1	0.01	0	-0.01
	10	11	THR	243	0	0	0	0	0	0	0	0	0	0	0	0	0.3	0.12	-0.2	0.04	0.1	0.12	0.3	0.12	-0.2	0.04	0.1	0.12	-0.3	0.12	0.2	0.04	-0.1	0.12	0	0	0	0	0	0	-0.3	0.12	0.2	0.04	-0.1	0.12	0	0	0
	11	12	MET	244	0	0	0	0	0	0	0	0	0	0	0	0	0.35	0.14	-0.38	0.2	-0.03	0.14	0.35	0.14	-0.38	0.2	-0.03	0.14	-0.34	0.14	0.37	0.2	0.03	0.14	0	0	0	0	0	0	-0.34	0.14	0.37	0.2	0.03	0.14	0	0	0
	12	13	LYS	245	0	0	0	0	0	0	0	0	0	0	0	0	5.4	1.5	-0.27	0.18	5.13	1.36	5.4	1.5	-0.27	0.18	5.13	1.36	-5.33	1.48	0.26	0.18	-5.07	1.34	0	0	0	0	0	0	-5.33	1.48	0.26	0.18	-5.07	1.34	0.07	0.02	0
	13	14	HIS	246	0	0	0	0	0	0	0	0	0	0	0	0	0.13	0.07	-0.17	0.05	-0.04	0.09	0.13	0.07	-0.17	0.05	-0.04	0.09	-0.13	0.07	0.17	0.05	0.04	0.09	0	0	0	0	0	0	-0.13	0.07	0.17	0.05	0.04	0.09	0	0	0
	14	15	LYS	247	0	0	0	0	0	0	0	0	0	0	0	0	7.29	2.48	-0.08	0.07	7.21	2.48	7.29	2.48	-0.08	0.07	7.21	2.48	-7.2	2.44	0.08	0.07	-7.11	2.44	0	0	0	0	0	0	-7.2	2.44	0.08	0.07	-7.11	2.44	0.09	0.04	0
	15	16	LEU	248	0	0	0	0	0	0	0	0	0	0	0	0	0.41	0.11	-0.48	0.17	-0.07	0.07	0.41	0.11	-0.48	0.17	-0.07	0.07	-0.4	0.11	0.48	0.16	0.07	0.07	0	0	0	0	0	0	-0.4	0.11	0.48	0.16	0.07	0.07	0.01	0	-0.01
	16	17	GLY	249	0	0	0	0	0	0	0	0	0	0	0	0	0	0	0	0.05	0	0.05	0	0	0	0.05	0	0.05	0	0	0	0.05	0	0.05	0	0	0	0	0	0	0	0	0	0.05	0	0.05	0	0	0
	17	18	GLY	250	0	0	0	0	0	0	0	0	0	0	0	0	0	0	0.01	0.06	0.01	0.06	0	0	0.01	0.06	0.01	0.06	0	0	-0.01	0.06	-0.01	0.06	0	0	0	0	0	0	0	0	-0.01	0.06	-0.01	0.06	0	0	0
	18	19	GLY	251	0	0	0	0	0	0	0	0	0	0	0	0	0	0	-0.04	0.07	-0.04	0.07	0	0	-0.04	0.07	-0.04	0.07	0	0	0.04	0.07	0.04	0.07	0	0	0	0	0	0	0	0	0.04	0.07	0.04	0.07	0	0	0
	19	20	GLN	252	0	0	0	0	0	0	0	0	0	0	0	0	0.2	0.1	-0.17	0.08	0.03	0.06	0.2	0.1	-0.17	0.08	0.03	0.06	-0.2	0.1	0.16	0.08	-0.03	0.06	0	0	0	0	0	0	-0.2	0.1	0.16	0.08	-0.03	0.06	0	0	0
	20	21	TYR	253	0	0	0	0	0	0	0	0	0	0	0	0	0.18	0.05	-0.18	0.09	0	0.08	0.18	0.05	-0.18	0.09	0	0.08	-0.17	0.05	0.18	0.09	0	0.07	0	0	0	0	0	0	-0.17	0.05	0.18	0.09	0	0.07	0	0	0
	21	22	GLY	254	0	0	0	0	0	0	0	0	0	0	0	0	0	0	0.1	0.16	0.1	0.16	0	0	0.1	0.16	0.1	0.16	0	0	-0.1	0.16	-0.1	0.16	0	0	0	0	0	0	0	0	-0.1	0.16	-0.1	0.16	0	0	0
	22	23	GLU	255	0	0	0	0	0	0	0	0.02	0	0	0	0.02	-7.18	3.44	-0.83	0.29	-8.01	3.72	-7.18	3.45	-0.83	0.3	-8.02	3.73	7.11	3.44	0.82	0.29	7.93	3.72	0	0	0	0	0	0	7.11	3.44	0.82	0.29	7.93	3.72	-0.07	0.03	-0.01
	23	24	VAL	256	0	0	0	0	0	0	0	0	0	0	0	0	0.65	0.21	-0.71	0.26	-0.06	0.06	0.65	0.21	-0.71	0.26	-0.06	0.06	-0.64	0.2	0.7	0.26	0.06	0.06	0	0	0	0	0	0	-0.64	0.2	0.7	0.26	0.06	0.06	0.01	0	-0.01
	24	25	TYR	257	0	0	0	0	0	0	0	0	0	0	0	0	0.17	0.1	-0.13	0.07	0.04	0.16	0.17	0.1	-0.13	0.07	0.04	0.16	-0.16	0.1	0.12	0.07	-0.04	0.16	0	0	0	0	0	0	-0.16	0.1	0.12	0.07	-0.04	0.16	0	0	0
	25	26	GLU	258	0	0	0	0	0	0	0	0	0	0	0	0	-4.5	1.15	-0.82	0.27	-5.31	1.41	-4.5	1.15	-0.82	0.27	-5.31	1.41	4.44	1.13	0.81	0.27	5.25	1.4	0	0	0	0	0	0	4.44	1.13	0.81	0.27	5.25	1.4	-0.06	0.01	-0.01
	26	27	GLY	259	0	0	0	0	0	0	0	0	0	0	0	0	0	0	0.07	0.05	0.07	0.05	0	0	0.07	0.05	0.07	0.05	0	0	-0.07	0.05	-0.07	0.05	0	0	0	0	0	0	0	0	-0.07	0.05	-0.07	0.05	0	0	0
	27	28	VAL	260	0	0	0	0	0	0	0	0	0	0	0	0	0.55	0.15	-0.65	0.2	-0.09	0.05	0.55	0.15	-0.65	0.2	-0.09	0.05	-0.55	0.15	0.64	0.19	0.09	0.05	0	0	0	0	0	0	-0.55	0.15	0.64	0.19	0.09	0.05	0.01	0	-0.01
	28	29	TRP	261	0	0	0	0	0	0	0	0	0	0	0	0	0.17	0.06	-0.09	0.02	0.09	0.06	0.17	0.06	-0.09	0.02	0.09	0.06	-0.17	0.06	0.08	0.02	-0.09	0.05	0	0	0	0	0	0	-0.17	0.06	0.08	0.02	-0.09	0.05	0	0	0
	29	30	LYS	262	0	0	0	0	0	0	0	0	0	0	0	0	5.99	1.96	-0.07	0.02	5.92	1.95	5.99	1.96	-0.07	0.02	5.92	1.95	-5.91	1.94	0.06	0.02	-5.85	1.92	0	0	0	0	0	0	-5.91	1.94	0.06	0.02	-5.85	1.92	0.08	0.03	0
	30	31	LYS	263	0	0	0	0	0	0	0	0	0	0	0	0	4.52	0.88	-0.06	0.02	4.46	0.88	4.52	0.88	-0.06	0.02	4.46	0.88	-4.47	0.87	0.06	0.02	-4.4	0.87	0	0	0	0	0	0	-4.47	0.87	0.06	0.02	-4.4	0.87	0.06	0.01	0
	31	32	TYR	264	0	0	0	0	0	0	0	0	0	0	0	0	0.1	0.02	-0.07	0.01	0.03	0.02	0.1	0.02	-0.07	0.01	0.03	0.02	-0.1	0.02	0.07	0.01	-0.03	0.02	0	0	0	0	0	0	-0.1	0.02	0.07	0.01	-0.03	0.02	0	0	0
	32	33	SER	265	0	0	0	0	0	0	0	0	0	0	0	0	0.23	0.06	-0.19	0.04	0.04	0.05	0.23	0.06	-0.19	0.04	0.04	0.05	-0.22	0.06	0.19	0.04	-0.04	0.05	0	0	0	0	0	0	-0.22	0.06	0.19	0.04	-0.04	0.05	0	0	0
	33	34	LEU	266	0	0	0	0	0	0	0	0	0	0	0	0	0.33	0.07	-0.42	0.11	-0.08	0.05	0.33	0.07	-0.42	0.11	-0.08	0.05	-0.33	0.07	0.41	0.11	0.08	0.05	0	0	0	0	0	0	-0.33	0.07	0.41	0.11	0.08	0.05	0	0	-0.01
	34	35	THR	267	0	0	0	0	0	0	0	0	0	0	0	0	0.23	0.05	-0.19	0.03	0.05	0.03	0.23	0.05	-0.19	0.03	0.05	0.03	-0.23	0.05	0.18	0.03	-0.05	0.03	0	0	0	0	0	0	-0.23	0.05	0.18	0.03	-0.05	0.03	0	0	0
	35	36	VAL	268	0	0	0	0	0	0	0	0	0	0	0	0	0.54	0.13	-0.55	0.15	-0.01	0.04	0.54	0.13	-0.55	0.15	-0.01	0.04	-0.53	0.12	0.55	0.15	0.01	0.04	0	0	0	0	0	0	-0.53	0.12	0.55	0.15	0.01	0.04	0.01	0	-0.01
	36	37	ALA	269	0	0	0	0	0	0	0	0	0	0	0	0	-0.01	0.01	0.06	0.04	0.05	0.04	-0.01	0.01	0.06	0.04	0.05	0.04	0.01	0.01	-0.06	0.04	-0.05	0.04	0	0	0	0	0	0	0.01	0.01	-0.06	0.04	-0.05	0.04	0	0	0
	37	38	VAL	270	0	0	0	0	0	0	0	0	0	0	0	0	0.64	0.18	-0.67	0.21	-0.03	0.05	0.64	0.18	-0.67	0.21	-0.03	0.05	-0.63	0.18	0.66	0.21	0.03	0.05	0	0	0	0	0	0	-0.63	0.18	0.66	0.21	0.03	0.05	0.01	0	-0.01
	38	39	LYS	271	0	0	0	0	0	0	0	0	0	0	0	0	5.82	1.78	-0.12	0.07	5.69	1.8	5.82	1.78	-0.12	0.07	5.69	1.8	-5.74	1.75	0.12	0.07	-5.62	1.78	0	0	0	0	0	0	-5.74	1.75	0.12	0.07	-5.62	1.78	0.07	0.02	0
	39	40	THR	272	0	0	0	0	0	0	0	0	0	0	0	0	0.29	0.08	-0.31	0.19	-0.02	0.19	0.29	0.08	-0.31	0.19	-0.02	0.19	-0.28	0.08	0.31	0.19	0.02	0.19	0	0	0	0	0	0	-0.28	0.08	0.31	0.19	0.02	0.19	0	0	0
	40	41	LEU	273	0	0	0	0	0	0	0	0.01	0	0.02	-0.01	0.03	0.6	0.27	-0.78	0.68	-0.18	0.43	0.6	0.27	-0.78	0.69	-0.19	0.45	-0.59	0.27	0.78	0.7	0.19	0.45	0	0	0	0	0	0	-0.59	0.27	0.78	0.69	0.19	0.45	0	0.01	0
	41	42	LYS	274	0	0	0	0	0	0	-0.02	0.09	-0.02	0.09	-0.04	0.17	9.08	4.34	-0.61	0.87	8.46	3.64	9.06	4.28	-0.63	0.94	8.43	3.55	-8.95	4.25	0.63	0.95	-8.32	3.51	-0.01	0.03	0	0.02	-0.01	0.05	-8.96	4.28	0.63	0.93	-8.33	3.55	0.1	0.07	0
	42	43	GLU	275	0	0	0	0	0	0	-0.03	0.12	-0.01	0.05	-0.04	0.16	-10.1	6.52	-0.88	0.38	-10.98	6.8	-10.13	6.6	-0.89	0.41	-11.02	6.91	10.1	6.71	0.87	0.38	10.97	7	-0.01	0.04	0	0	-0.01	0.04	10.09	6.68	0.87	0.38	10.96	6.96	-0.04	0.14	-0.02
	43	44	ASP	276	0	0	0	0	0	0	0	0.01	0	0.01	-0.01	0.01	-8.41	3.68	-1.05	0.34	-9.46	4	-8.41	3.68	-1.05	0.35	-9.46	4.01	8.33	3.67	1.04	0.34	9.37	3.98	0	0	0	0	0	0	8.33	3.67	1.04	0.34	9.37	3.98	-0.08	0.02	-0.02
	44	45	THR	277	0	0	0	0	0	0	-0.01	0.02	-0.01	0.01	-0.01	0.04	0.58	0.41	-0.7	0.58	-0.12	0.26	0.57	0.4	-0.71	0.6	-0.14	0.28	-0.57	0.4	0.71	0.6	0.14	0.28	0	0.02	0	0	0	0.02	-0.57	0.4	0.71	0.6	0.14	0.27	0	0.03	0
	45	46	MET	278	0	0	0	0	0	0	-0.02	0.07	-0.01	0.02	-0.02	0.08	0.54	0.43	-0.32	0.17	0.22	0.31	0.52	0.4	-0.33	0.18	0.2	0.27	-0.53	0.42	0.32	0.17	-0.21	0.3	0	0.03	0	0	0	0.03	-0.53	0.42	0.32	0.17	-0.21	0.31	-0.01	0.07	-0.01
	46	47	GLU	279	0	0	0	0	0	0	-0.09	0.25	-0.01	0.02	-0.09	0.27	-8.94	6.97	-0.96	0.58	-9.89	7.45	-9.02	7.17	-0.97	0.6	-9.99	7.67	9.01	7.41	0.96	0.59	9.97	7.88	-0.03	0.1	0	0	-0.03	0.1	8.98	7.32	0.96	0.59	9.93	7.8	-0.04	0.35	-0.01
	47	48	VAL	280	0	0	0	0	0	0	0	0	0	0	0	0.01	0.83	0.37	-0.72	0.32	0.11	0.14	0.83	0.37	-0.72	0.33	0.11	0.14	-0.82	0.37	0.71	0.32	-0.1	0.14	0	0	0	0	0	0	-0.82	0.37	0.71	0.32	-0.1	0.14	0.01	0	-0.01
	48	49	GLU	281	0	0	0	0	0	0	0	0	0	0	0	0	-5.79	2.47	-0.66	0.2	-6.45	2.65	-5.79	2.47	-0.67	0.2	-6.46	2.65	5.72	2.45	0.66	0.2	6.38	2.63	0	0	0	0	0	0	5.72	2.45	0.66	0.2	6.38	2.63	-0.07	0.02	-0.01
	49	50	GLU	282	0	0	0	0	0	0	0	0	0	0	0	0	-5.91	2.82	-0.6	0.16	-6.51	2.96	-5.91	2.82	-0.61	0.16	-6.51	2.97	5.84	2.79	0.6	0.16	6.44	2.94	0	0	0	0	0	0	5.84	2.79	0.6	0.16	6.44	2.94	-0.07	0.03	-0.01
	50	51	PHE	283	0	0	0	0	0	0	0	0	0	0	0	0	0.13	0.04	0.04	0.1	0.16	0.14	0.13	0.04	0.04	0.1	0.16	0.14	-0.13	0.04	-0.04	0.1	-0.16	0.14	0	0	0	0	0	0	-0.13	0.04	-0.04	0.1	-0.16	0.14	0	0	0
	51	52	LEU	284	0	0	0	0	0	0	0	0	0	0	0	0	0.48	0.16	-0.34	0.06	0.14	0.12	0.48	0.16	-0.34	0.06	0.14	0.12	-0.47	0.16	0.34	0.06	-0.14	0.12	0	0	0	0	0	0	-0.47	0.16	0.34	0.06	-0.14	0.12	0.01	0	0
	52	53	LYS	285	0	0	0	0	0	0	0	0	0	0	0	0	5.48	1.82	-0.03	0.06	5.45	1.87	5.48	1.82	-0.03	0.06	5.45	1.87	-5.41	1.8	0.03	0.06	-5.38	1.85	0	0	0	0	0	0	-5.41	1.8	0.03	0.06	-5.38	1.85	0.07	0.02	0
	53	54	GLU	286	0	0	0	0	0	0	0	0	0	0	0	0	-5.12	1.77	-0.53	0.11	-5.65	1.88	-5.12	1.77	-0.53	0.11	-5.65	1.88	5.05	1.75	0.53	0.11	5.58	1.86	0	0	0	0	0	0	5.05	1.75	0.53	0.11	5.58	1.86	-0.06	0.02	-0.01
	54	55	ALA	287	0	0	0	0	0	0	0	0	0	0	0	0	0	0	0.1	0.08	0.1	0.08	0	0	0.1	0.08	0.1	0.08	0	0	-0.1	0.08	-0.1	0.08	0	0	0	0	0	0	0	0	-0.1	0.08	-0.1	0.08	0	0	0
	55	56	ALA	288	0	0	0	0	0	0	0	0	0	0	0	0	-0.01	0	0.08	0.06	0.07	0.06	-0.01	0	0.08	0.06	0.07	0.06	0.01	0	-0.08	0.06	-0.07	0.06	0	0	0	0	0	0	0.01	0	-0.08	0.06	-0.07	0.06	0	0	0
	56	57	VAL	289	0	0	0	0	0	0	0	0	0	0	0	0	0.51	0.13	-0.42	0.07	0.09	0.07	0.51	0.13	-0.42	0.07	0.09	0.07	-0.5	0.13	0.41	0.07	-0.09	0.07	0	0	0	0	0	0	-0.5	0.13	0.41	0.07	-0.09	0.07	0.01	0	-0.01
	57	58	MET	290	0	0	0	0	0	0	0	0	0	0	0	0	0.28	0.11	-0.17	0.03	0.11	0.11	0.28	0.11	-0.17	0.03	0.11	0.11	-0.27	0.11	0.17	0.02	-0.11	0.11	0	0	0	0	0	0	-0.27	0.11	0.17	0.02	-0.11	0.11	0	0	0
	58	59	LYS	291	0	0	0	0	0	0	0	0	0	0	0	0	5.12	1.13	-0.07	0.02	5.05	1.13	5.12	1.13	-0.07	0.02	5.05	1.13	-5.05	1.11	0.07	0.02	-4.98	1.12	0	0	0	0	0	0	-5.05	1.11	0.07	0.02	-4.98	1.12	0.06	0.01	0
	59	60	GLU	292	0	0	0	0	0	0	0	0	0	0	0	0	-3.71	0.75	-0.45	0.07	-4.16	0.82	-3.71	0.75	-0.45	0.07	-4.16	0.82	3.67	0.75	0.44	0.07	4.11	0.81	0	0	0	0	0	0	3.67	0.75	0.44	0.07	4.11	0.81	-0.05	0.01	-0.01
	60	61	ILE	293	0	0	0	0	0	0	0	0	0	0	0	0	0.37	0.08	-0.41	0.09	-0.04	0.02	0.37	0.08	-0.41	0.09	-0.04	0.02	-0.37	0.08	0.4	0.09	0.04	0.02	0	0	0	0	0	0	-0.37	0.08	0.4	0.09	0.04	0.02	0	0	-0.01
	61	62	LYS	294	0	0	0	0	0	0	0	0	0	0	0	0	4.02	0.64	-0.08	0.02	3.94	0.63	4.02	0.64	-0.08	0.02	3.94	0.63	-3.97	0.63	0.08	0.02	-3.89	0.62	0	0	0	0	0	0	-3.97	0.63	0.08	0.02	-3.89	0.62	0.05	0.01	0
	62	63	HIS	295	0	0	0	0	0	0	0	0	0	0	0	0	0.09	0.02	-0.19	0.05	-0.11	0.06	0.09	0.02	-0.19	0.05	-0.11	0.06	-0.09	0.02	0.19	0.05	0.1	0.06	0	0	0	0	0	0	-0.09	0.02	0.19	0.05	0.1	0.06	0	0	0
	63	64	PRO	296	0	0	0	0	0	0	0	0	0	0	0	0	0.73	0.12	-0.77	0.13	-0.04	0.02	0.73	0.12	-0.77	0.13	-0.04	0.02	-0.72	0.12	0.76	0.13	0.04	0.02	0	0	0	0	0	0	-0.72	0.12	0.76	0.13	0.04	0.02	0.01	0	-0.01
	64	65	ASN	297	0	0	0	0	0	0	0	0	0	0	0	0	0.02	0.02	0	0.02	0.02	0.02	0.02	0.02	0	0.02	0.02	0.02	-0.02	0.02	0	0.02	-0.02	0.02	0	0	0	0	0	0	-0.02	0.02	0	0.02	-0.02	0.02	0	0	0
	65	66	LEU	298	0	0	0	0	0	0	0	0	0	0	0	0	0.31	0.06	-0.26	0.04	0.05	0.04	0.31	0.06	-0.26	0.04	0.05	0.04	-0.31	0.06	0.26	0.04	-0.05	0.04	0	0	0	0	0	0	-0.31	0.06	0.26	0.04	-0.05	0.04	0	0	0
	66	67	VAL	299	0	0	0	0	0	0	0	0	0	0	0	0	0.47	0.1	-0.47	0.11	0.01	0.03	0.47	0.1	-0.47	0.11	0.01	0.03	-0.47	0.1	0.46	0.11	-0.01	0.03	0	0	0	0	0	0	-0.47	0.1	0.46	0.11	-0.01	0.03	0.01	0	-0.01
	67	68	GLN	300	0	0	0	0	0	0	0	0	0	0	0	0	0.16	0.05	-0.2	0.06	-0.05	0.05	0.16	0.05	-0.2	0.06	-0.05	0.05	-0.15	0.05	0.2	0.06	0.05	0.05	0	0	0	0	0	0	-0.15	0.05	0.2	0.06	0.05	0.05	0	0	0
	68	69	LEU	301	0	0	0	0	0	0	0	0	0	0	0	0	0.35	0.07	-0.27	0.04	0.08	0.04	0.35	0.07	-0.27	0.04	0.08	0.04	-0.35	0.07	0.27	0.04	-0.08	0.04	0	0	0	0	0	0	-0.35	0.07	0.27	0.04	-0.08	0.04	0	0	0
	69	70	LEU	302	0	0	0	0	0	0	0	0	0	0	0	0	0.35	0.07	-0.3	0.05	0.06	0.04	0.35	0.07	-0.3	0.05	0.06	0.04	-0.35	0.07	0.3	0.05	-0.05	0.04	0	0	0	0	0	0	-0.35	0.07	0.3	0.05	-0.05	0.04	0	0	0
	70	71	GLY	303	0	0	0	0	0	0	0	0	0	0	0	0	0	0	-0.01	0.03	-0.01	0.03	0	0	-0.01	0.03	-0.01	0.03	0	0	0.01	0.03	0.01	0.03	0	0	0	0	0	0	0	0	0.01	0.03	0.01	0.03	0	0	0
	71	72	VAL	304	0	0	0	0	0	0	0	0	0	0	0	0	0.59	0.14	-0.51	0.1	0.07	0.08	0.59	0.14	-0.51	0.1	0.07	0.08	-0.58	0.14	0.51	0.1	-0.07	0.08	0	0	0	0	0	0	-0.58	0.14	0.51	0.1	-0.07	0.08	0.01	0	-0.01
	72	73	CYS	305	0	0	0	0	0	0	0	0	0	0	0	0	-0.11	0.04	0.05	0.07	-0.06	0.08	-0.11	0.04	0.05	0.07	-0.06	0.08	0.1	0.04	-0.05	0.07	0.06	0.08	0	0	0	0	0	0	0.1	0.04	-0.05	0.07	0.06	0.08	0	0	0
	73	74	THR	306	0	0	0	0	0	0	0	0	0	0	0	0	0.37	0.11	-0.37	0.14	0.01	0.08	0.37	0.11	-0.37	0.14	0.01	0.08	-0.37	0.11	0.36	0.14	-0.01	0.08	0	0	0	0	0	0	-0.37	0.11	0.36	0.14	-0.01	0.08	0	0	0
	74	75	ARG	307	0	0	0	0	0	0	0	0	0	0	0	0	6.04	1.41	-0.22	0.09	5.82	1.38	6.04	1.41	-0.22	0.09	5.82	1.38	-5.97	1.39	0.22	0.09	-5.75	1.37	0	0	0	0	0	0	-5.97	1.39	0.22	0.09	-5.75	1.37	0.08	0.02	0
	75	76	GLU	308	0	0	0	0	0	0	0	0	0	0	0	0	-5.63	1.4	-0.7	0.18	-6.33	1.57	-5.63	1.4	-0.7	0.18	-6.33	1.57	5.56	1.39	0.7	0.18	6.26	1.56	0	0	0	0	0	0	5.56	1.39	0.7	0.18	6.26	1.56	-0.07	0.02	-0.01
	76	77	PRO	309	0	0	0	0	0	0	0	0	0	0	0	0	1.58	0.49	-1.47	0.4	0.11	0.24	1.58	0.49	-1.48	0.4	0.11	0.24	-1.56	0.48	1.46	0.4	-0.1	0.23	0	0	0	0	0	0	-1.56	0.48	1.46	0.4	-0.1	0.23	0.02	0.01	-0.02
	77	78	PRO	310	0	0	0	0	0	0	0	0	0	0	0	0	1.63	0.53	-1.44	0.42	0.2	0.18	1.63	0.53	-1.44	0.42	0.19	0.18	-1.61	0.52	1.42	0.42	-0.19	0.17	0	0	0	0	0	0	-1.61	0.52	1.42	0.42	-0.19	0.17	0.02	0.01	-0.02
	78	79	PHE	311	0	0	0	0	0	0	0	0	0	0	0	0	0.14	0.06	-0.25	0.14	-0.11	0.11	0.14	0.06	-0.25	0.15	-0.11	0.11	-0.14	0.06	0.25	0.14	0.11	0.11	0	0	0	0	0	0	-0.14	0.06	0.25	0.14	0.11	0.11	0	0	0
	79	80	TYR	312	0	0	0	0	0	0	0	0	0	0	0	0	0.22	0.14	-0.17	0.05	0.05	0.12	0.22	0.14	-0.17	0.05	0.05	0.12	-0.22	0.13	0.17	0.05	-0.04	0.12	0	0	0	0	0	0	-0.22	0.13	0.17	0.05	-0.04	0.12	0	0	0
	80	81	ILE	313	0	0	0	0	0	0	0	0	0	0	0	0	0.51	0.15	-0.58	0.19	-0.07	0.05	0.51	0.15	-0.58	0.19	-0.07	0.05	-0.51	0.14	0.57	0.18	0.07	0.05	0	0	0	0	0	0	-0.51	0.14	0.57	0.18	0.07	0.05	0.01	0	-0.01
	81	82	ILE	314	0	0	0	0	0	0	0	0	0	0	0	0	0.48	0.11	-0.44	0.1	0.03	0.04	0.48	0.11	-0.44	0.1	0.03	0.04	-0.47	0.11	0.44	0.1	-0.03	0.04	0	0	0	0	0	0	-0.47	0.11	0.44	0.1	-0.03	0.04	0.01	0	-0.01
	82	83	ILE	315	0	0	0	0	0	0	0	0	0	0	0	0	0.44	0.1	-0.49	0.12	-0.05	0.05	0.44	0.1	-0.49	0.12	-0.05	0.05	-0.43	0.1	0.49	0.12	0.05	0.04	0	0	0	0	0	0	-0.43	0.1	0.49	0.12	0.05	0.04	0.01	0	-0.01
	83	84	GLU	316	0	0	0	0	0	0	0	0	0	0	0	0	-3.7	0.68	-0.63	0.17	-4.33	0.84	-3.7	0.68	-0.63	0.17	-4.33	0.84	3.65	0.68	0.62	0.16	4.27	0.83	0	0	0	0	0	0	3.65	0.68	0.62	0.16	4.27	0.83	-0.05	0.01	-0.01
	84	85	PHE	317	0	0	0	0	0	0	0	0	0	0	0	0	0.09	0.02	-0.03	0.02	0.06	0.04	0.09	0.02	-0.03	0.02	0.06	0.04	-0.09	0.02	0.03	0.02	-0.06	0.04	0	0	0	0	0	0	-0.09	0.02	0.03	0.02	-0.06	0.04	0	0	0
	85	86	MET	318	0	0	0	0	0	0	0	0	0	0	0	0	0.22	0.05	-0.27	0.07	-0.05	0.03	0.22	0.05	-0.27	0.07	-0.05	0.03	-0.22	0.05	0.27	0.07	0.05	0.03	0	0	0	0	0	0	-0.22	0.05	0.27	0.07	0.05	0.03	0	0	0
	86	87	THR	319	0	0	0	0	0	0	0	0	0	0	0	0	0.22	0.05	-0.24	0.06	-0.02	0.03	0.22	0.05	-0.24	0.06	-0.02	0.03	-0.22	0.05	0.24	0.06	0.02	0.03	0	0	0	0	0	0	-0.22	0.05	0.24	0.06	0.02	0.03	0	0	0
	87	88	TYR	320	0	0	0	0	0	0	0	0	0	0	0	0	0.11	0.02	-0.1	0.02	0.01	0.02	0.11	0.02	-0.1	0.02	0.01	0.02	-0.11	0.02	0.1	0.02	-0.01	0.02	0	0	0	0	0	0	-0.11	0.02	0.1	0.02	-0.01	0.02	0	0	0
	88	89	GLY	321	0	0	0	0	0	0	0	0	0	0	0	0	0	0	0.07	0.04	0.07	0.04	0	0	0.07	0.04	0.07	0.04	0	0	-0.07	0.04	-0.07	0.04	0	0	0	0	0	0	0	0	-0.07	0.04	-0.07	0.04	0	0	0
	89	90	ASN	322	0	0	0	0	0	0	0	0	0	0	0	0	0.06	0.04	0.05	0.03	0.12	0.06	0.06	0.04	0.05	0.03	0.12	0.06	-0.06	0.04	-0.05	0.03	-0.11	0.06	0	0	0	0	0	0	-0.06	0.04	-0.05	0.03	-0.11	0.06	0	0	0
	90	91	LEU	323	0	0	0	0	0	0	0	0	0	0	0	0	0.29	0.06	-0.26	0.04	0.03	0.02	0.29	0.06	-0.26	0.04	0.03	0.02	-0.29	0.06	0.25	0.04	-0.03	0.02	0	0	0	0	0	0	-0.29	0.06	0.25	0.04	-0.03	0.02	0	0	0
	91	92	LEU	324	0	0	0	0	0	0	0	0	0	0	0	0	0.31	0.07	-0.24	0.04	0.08	0.04	0.31	0.07	-0.24	0.04	0.08	0.04	-0.31	0.07	0.24	0.04	-0.07	0.04	0	0	0	0	0	0	-0.31	0.07	0.24	0.04	-0.07	0.04	0	0	0
	92	93	ASP	325	0	0	0	0	0	0	0	0	0	0	0	0	-3.68	0.82	-0.53	0.1	-4.21	0.92	-3.68	0.82	-0.53	0.1	-4.21	0.92	3.63	0.81	0.52	0.1	4.16	0.91	0	0	0	0	0	0	3.63	0.81	0.52	0.1	4.16	0.91	-0.05	0.01	-0.01
	93	94	TYR	326	0	0	0	0	0	0	0	0	0	0	0	0	0.1	0.02	-0.07	0.01	0.03	0.02	0.1	0.02	-0.07	0.01	0.03	0.02	-0.1	0.02	0.07	0.01	-0.03	0.02	0	0	0	0	0	0	-0.1	0.02	0.07	0.01	-0.03	0.02	0	0	0
	94	95	LEU	327	0	0	0	0	0	0	0	0	0	0	0	0	0.27	0.05	-0.23	0.03	0.05	0.02	0.27	0.05	-0.23	0.03	0.05	0.02	-0.27	0.05	0.22	0.03	-0.05	0.02	0	0	0	0	0	0	-0.27	0.05	0.22	0.03	-0.05	0.02	0	0	0
	95	96	ARG	328	0	0	0	0	0	0	0	0	0	0	0	0	4.2	0.94	-0.11	0.02	4.09	0.93	4.2	0.94	-0.11	0.02	4.09	0.93	-4.15	0.93	0.11	0.02	-4.04	0.92	0	0	0	0	0	0	-4.15	0.93	0.11	0.02	-4.04	0.92	0.05	0.01	0
	96	97	GLU	329	0	0	0	0	0	0	0	0	0	0	0	0	-3.46	0.69	-0.4	0.07	-3.86	0.76	-3.46	0.69	-0.4	0.07	-3.86	0.76	3.42	0.68	0.39	0.07	3.81	0.75	0	0	0	0	0	0	3.42	0.68	0.39	0.07	3.81	0.75	-0.04	0.01	0
	97	98	CYS	330	0	0	0	0	0	0	0	0	0	0	0	0	-0.05	0.01	0.07	0.02	0.02	0.02	-0.05	0.01	0.07	0.02	0.02	0.02	0.05	0.01	-0.07	0.02	-0.02	0.02	0	0	0	0	0	0	0.05	0.01	-0.07	0.02	-0.02	0.02	0	0	0
	98	99	ASN	331	0	0	0	0	0	0	0	0	0	0	0	0	0	0.02	0.02	0.01	0.02	0.02	0	0.02	0.02	0.01	0.02	0.02	0	0.02	-0.02	0.01	-0.02	0.02	0	0	0	0	0	0	0	0.02	-0.02	0.01	-0.02	0.02	0	0	0
	99	100	ARG	332	0	0	0	0	0	0	0	0	0	0	0	0	3.24	0.51	-0.1	0.01	3.14	0.5	3.24	0.51	-0.1	0.01	3.14	0.5	-3.2	0.51	0.09	0.01	-3.1	0.49	0	0	0	0	0	0	-3.2	0.51	0.09	0.01	-3.1	0.49	0.04	0.01	0
	100	101	GLN	333	0	0	0	0	0	0	0	0	0	0	0	0	0.08	0.03	-0.07	0.01	0.01	0.03	0.08	0.03	-0.07	0.01	0.01	0.03	-0.08	0.03	0.07	0.01	-0.01	0.03	0	0	0	0	0	0	-0.08	0.03	0.07	0.01	-0.01	0.03	0	0	0
	101	102	GLU	334	0	0	0	0	0	0	0	0	0	0	0	0	-2.74	0.4	-0.34	0.05	-3.08	0.45	-2.74	0.4	-0.34	0.05	-3.08	0.45	2.71	0.4	0.33	0.05	3.04	0.44	0	0	0	0	0	0	2.71	0.4	0.33	0.05	3.04	0.44	-0.03	0.01	0
	102	103	VAL	335	0	0	0	0	0	0	0	0	0	0	0	0	0.34	0.05	-0.31	0.05	0.03	0.01	0.34	0.05	-0.31	0.05	0.03	0.01	-0.33	0.05	0.31	0.04	-0.03	0.01	0	0	0	0	0	0	-0.33	0.05	0.31	0.04	-0.03	0.01	0	0	0
	103	104	ASN	336	0	0	0	0	0	0	0	0	0	0	0	0	-0.03	0.02	-0.01	0.01	-0.04	0.03	-0.03	0.02	-0.01	0.01	-0.04	0.03	0.03	0.02	0.01	0.01	0.04	0.03	0	0	0	0	0	0	0.03	0.02	0.01	0.01	0.04	0.03	0	0	0
	104	105	ALA	337	0	0	0	0	0	0	0	0	0	0	0	0	-0.01	0	-0.02	0.01	-0.03	0.01	-0.01	0	-0.02	0.01	-0.03	0.01	0.01	0	0.02	0.01	0.03	0.01	0	0	0	0	0	0	0.01	0	0.02	0.01	0.03	0.01	0	0	0
	105	106	VAL	338	0	0	0	0	0	0	0	0	0	0	0	0	0.31	0.05	-0.33	0.05	-0.02	0.01	0.31	0.05	-0.33	0.05	-0.02	0.01	-0.3	0.05	0.33	0.05	0.02	0.01	0	0	0	0	0	0	-0.3	0.05	0.33	0.05	0.02	0.01	0	0	0
	106	107	VAL	339	0	0	0	0	0	0	0	0	0	0	0	0	0.33	0.05	-0.36	0.06	-0.02	0.01	0.33	0.05	-0.36	0.06	-0.02	0.01	-0.33	0.05	0.35	0.06	0.02	0.01	0	0	0	0	0	0	-0.33	0.05	0.35	0.06	0.02	0.01	0	0	0
	107	108	LEU	340	0	0	0	0	0	0	0	0	0	0	0	0	0.24	0.04	-0.27	0.05	-0.04	0.01	0.24	0.04	-0.27	0.05	-0.04	0.01	-0.24	0.04	0.27	0.05	0.04	0.01	0	0	0	0	0	0	-0.24	0.04	0.27	0.05	0.04	0.01	0	0	0
	108	109	LEU	341	0	0	0	0	0	0	0	0	0	0	0	0	0.23	0.04	-0.26	0.05	-0.03	0.01	0.23	0.04	-0.26	0.05	-0.03	0.01	-0.22	0.03	0.26	0.04	0.03	0.01	0	0	0	0	0	0	-0.22	0.03	0.26	0.04	0.03	0.01	0	0	0
	109	110	TYR	342	0	0	0	0	0	0	0	0	0	0	0	0	0.1	0.02	-0.11	0.02	-0.01	0.01	0.1	0.02	-0.11	0.02	-0.01	0.01	-0.1	0.02	0.11	0.02	0.01	0.01	0	0	0	0	0	0	-0.1	0.02	0.11	0.02	0.01	0.01	0	0	0
	110	111	MET	343	0	0	0	0	0	0	0	0	0	0	0	0	0.17	0.03	-0.2	0.04	-0.03	0.02	0.17	0.03	-0.2	0.04	-0.03	0.02	-0.16	0.03	0.2	0.04	0.03	0.02	0	0	0	0	0	0	-0.16	0.03	0.2	0.04	0.03	0.02	0	0	0
	111	112	ALA	344	0	0	0	0	0	0	0	0	0	0	0	0	-0.01	0	-0.03	0.01	-0.03	0.02	-0.01	0	-0.03	0.01	-0.03	0.02	0.01	0	0.03	0.01	0.03	0.02	0	0	0	0	0	0	0.01	0	0.03	0.01	0.03	0.02	0	0	0
	112	113	THR	345	0	0	0	0	0	0	0	0	0	0	0	0	0.17	0.03	-0.19	0.03	-0.02	0.01	0.17	0.03	-0.19	0.03	-0.02	0.01	-0.17	0.03	0.19	0.03	0.02	0.01	0	0	0	0	0	0	-0.17	0.03	0.19	0.03	0.02	0.01	0	0	0
	113	114	GLN	346	0	0	0	0	0	0	0	0	0	0	0	0	0.08	0.02	-0.13	0.03	-0.05	0.02	0.08	0.02	-0.13	0.03	-0.05	0.02	-0.08	0.02	0.13	0.03	0.05	0.02	0	0	0	0	0	0	-0.08	0.02	0.13	0.03	0.05	0.02	0	0	0
	114	115	ILE	347	0	0	0	0	0	0	0	0	0	0	0	0	0.33	0.06	-0.35	0.07	-0.02	0.01	0.33	0.06	-0.35	0.07	-0.02	0.01	-0.32	0.06	0.34	0.07	0.02	0.01	0	0	0	0	0	0	-0.32	0.06	0.34	0.07	0.02	0.01	0	0	0
	115	116	SER	348	0	0	0	0	0	0	0	0	0	0	0	0	0.19	0.04	-0.21	0.05	-0.02	0.02	0.19	0.04	-0.21	0.05	-0.02	0.02	-0.19	0.04	0.21	0.04	0.02	0.02	0	0	0	0	0	0	-0.19	0.04	0.21	0.04	0.02	0.02	0	0	0
	116	117	SER	349	0	0	0	0	0	0	0	0	0	0	0	0	0.21	0.04	-0.19	0.04	0.01	0.02	0.21	0.04	-0.19	0.04	0.01	0.02	-0.2	0.04	0.19	0.04	-0.01	0.02	0	0	0	0	0	0	-0.2	0.04	0.19	0.04	-0.01	0.02	0	0	0
	117	118	ALA	350	0	0	0	0	0	0	0	0	0	0	0	0	0	0	0	0.01	0	0.01	0	0	0	0.01	0	0.01	0	0	0	0.01	0	0.01	0	0	0	0	0	0	0	0	0	0.01	0	0.01	0	0	0
	118	119	MET	351	0	0	0	0	0	0	0	0	0	0	0	0	0.17	0.04	-0.2	0.05	-0.04	0.02	0.17	0.04	-0.2	0.05	-0.04	0.02	-0.17	0.03	0.2	0.05	0.04	0.02	0	0	0	0	0	0	-0.17	0.03	0.2	0.05	0.04	0.02	0	0	0
	119	120	GLU	352	0	0	0	0	0	0	0	0	0	0	0	0	-2.94	0.49	-0.42	0.08	-3.36	0.57	-2.94	0.49	-0.42	0.08	-3.36	0.57	2.9	0.48	0.42	0.08	3.32	0.56	0	0	0	0	0	0	2.9	0.48	0.42	0.08	3.32	0.56	-0.04	0.01	-0.01
	120	121	TYR	353	0	0	0	0	0	0	0	0	0	0	0	0	0.08	0.01	-0.1	0.02	-0.01	0.02	0.08	0.01	-0.1	0.02	-0.01	0.02	-0.08	0.01	0.09	0.02	0.01	0.02	0	0	0	0	0	0	-0.08	0.01	0.09	0.02	0.01	0.02	0	0	0
	121	122	LEU	354	0	0	0	0	0	0	0	0	0	0	0	0	0.3	0.06	-0.31	0.07	-0.01	0.02	0.3	0.06	-0.31	0.07	-0.01	0.02	-0.3	0.06	0.3	0.07	0.01	0.02	0	0	0	0	0	0	-0.3	0.06	0.3	0.07	0.01	0.02	0	0	0
	122	123	GLU	355	0	0	0	0	0	0	0	0	0	0	0	0	-3.05	0.58	-0.46	0.1	-3.51	0.68	-3.05	0.58	-0.46	0.1	-3.51	0.68	3.01	0.57	0.46	0.1	3.46	0.67	0	0	0	0	0	0	3.01	0.57	0.46	0.1	3.46	0.67	-0.04	0.01	-0.01
	123	124	LYS	356	0	0	0	0	0	0	0	0	0	0	0	0	3.45	0.59	-0.08	0.02	3.37	0.58	3.45	0.59	-0.08	0.02	3.37	0.58	-3.4	0.58	0.08	0.02	-3.32	0.57	0	0	0	0	0	0	-3.4	0.58	0.08	0.02	-3.32	0.57	0.04	0.01	0
	124	125	LYS	357	0	0	0	0	0	0	0	0	0	0	0	0	3.99	0.81	-0.14	0.04	3.85	0.77	3.99	0.81	-0.14	0.04	3.85	0.77	-3.94	0.8	0.14	0.04	-3.8	0.76	0	0	0	0	0	0	-3.94	0.8	0.14	0.04	-3.8	0.76	0.05	0.01	0
	125	126	ASN	358	0	0	0	0	0	0	0	0	0	0	0	0	-0.02	0.04	-0.04	0.04	-0.06	0.06	-0.02	0.04	-0.04	0.04	-0.06	0.06	0.02	0.04	0.04	0.04	0.06	0.06	0	0	0	0	0	0	0.02	0.04	0.04	0.04	0.06	0.06	0	0	0
	126	127	PHE	359	0	0	0	0	0	0	0	0	0	0	0	0	0.09	0.02	-0.02	0.02	0.07	0.04	0.09	0.02	-0.02	0.02	0.07	0.04	-0.09	0.02	0.02	0.02	-0.07	0.04	0	0	0	0	0	0	-0.09	0.02	0.02	0.02	-0.07	0.04	0	0	0
	127	128	ILE	360	0	0	0	0	0	0	0	0	0	0	0	0	0.39	0.11	-0.44	0.14	-0.06	0.03	0.39	0.11	-0.44	0.14	-0.06	0.03	-0.38	0.11	0.44	0.14	0.06	0.03	0	0	0	0	0	0	-0.38	0.11	0.44	0.14	0.06	0.03	0	0	-0.01
	128	129	HIS	361	0	0	0	0	0	0	0	0	0	0	0	0	0.15	0.04	-0.26	0.11	-0.1	0.09	0.15	0.04	-0.26	0.11	-0.1	0.09	-0.15	0.04	0.25	0.1	0.1	0.09	0	0	0	0	0	0	-0.15	0.04	0.25	0.1	0.1	0.09	0	0	0
	129	130	ARG	362	0	0	0	0	0	0	0	0	0	0	0	0	5.28	2.02	-0.23	0.1	5.06	1.93	5.28	2.02	-0.23	0.1	5.06	1.93	-5.22	2	0.22	0.1	-4.99	1.9	0	0	0	0	0	0	-5.22	2	0.22	0.1	-4.99	1.9	0.07	0.03	0
	130	131	ASP	363	0	0	0	0	0	0	0	0	0	0	0	0	-4.23	1.31	-0.69	0.21	-4.92	1.51	-4.23	1.31	-0.69	0.21	-4.92	1.51	4.18	1.29	0.68	0.2	4.86	1.49	0	0	0	0	0	0	4.18	1.29	0.68	0.2	4.86	1.49	-0.05	0.02	-0.01
	131	132	LEU	364	0	0	0	0	0	0	0	0	0	0	0	0	0.31	0.07	-0.28	0.07	0.02	0.02	0.3	0.07	-0.28	0.07	0.02	0.01	-0.3	0.07	0.28	0.07	-0.02	0.01	0	0	0	0	0	0	-0.3	0.07	0.28	0.07	-0.02	0.01	0	0	0
	132	133	ALA	365	0	0	0	0	0	0	0	0	0	0	0	0	0	0	-0.02	0.02	-0.03	0.02	0	0	-0.02	0.02	-0.03	0.02	0	0	0.02	0.01	0.03	0.01	0	0	0	0	0	0	0	0	0.02	0.01	0.03	0.01	0	0	0
	133	134	ALA	366	0	0	0	0	0	0	0	0	0	0	0	0	-0.01	0	-0.01	0.02	-0.02	0.02	-0.01	0	-0.01	0.02	-0.02	0.02	0.01	0	0.01	0.02	0.02	0.02	0	0	0	0	0	0	0.01	0	0.01	0.02	0.02	0.02	0	0	0
	134	135	ARG	367	0	0	0	0	0	0	0	0	0	0	0	0	4.79	1.35	-0.21	0.06	4.58	1.3	4.79	1.35	-0.21	0.06	4.58	1.3	-4.73	1.33	0.21	0.06	-4.52	1.28	0	0	0	0	0	0	-4.73	1.33	0.21	0.06	-4.52	1.28	0.06	0.02	0
	135	136	ASN	368	0	0	0	0	0	0	0	0	0	0	0	0	-0.11	0.06	0.01	0.02	-0.1	0.06	-0.11	0.06	0.01	0.02	-0.1	0.06	0.11	0.06	-0.01	0.02	0.1	0.06	0	0	0	0	0	0	0.11	0.06	-0.01	0.02	0.1	0.06	0	0	0
	136	137	CYS	369	0	0	0	0	0	0	0	0	0	0	0	0	-0.07	0.01	0.06	0.02	-0.01	0.02	-0.07	0.01	0.06	0.02	-0.01	0.02	0.07	0.01	-0.06	0.02	0.01	0.02	0	0	0	0	0	0	0.07	0.01	-0.06	0.02	0.01	0.02	0	0	0
	137	138	LEU	370	0	0	0	0	0	0	0	0	0	0	0	0	0.33	0.07	-0.28	0.06	0.05	0.03	0.33	0.07	-0.28	0.06	0.05	0.03	-0.33	0.07	0.28	0.06	-0.05	0.03	0	0	0	0	0	0	-0.33	0.07	0.28	0.06	-0.05	0.03	0	0	0
	138	139	VAL	371	0	0	0	0	0	0	0	0	0	0	0	0	0.42	0.08	-0.47	0.1	-0.06	0.03	0.42	0.08	-0.47	0.1	-0.06	0.03	-0.41	0.08	0.47	0.1	0.05	0.03	0	0	0	0	0	0	-0.41	0.08	0.47	0.1	0.05	0.03	0.01	0	-0.01
	139	140	GLY	372	0	0	0	0	0	0	0	0	0	0	0	0	0	0	0	0.01	0	0.01	0	0	0	0.01	0	0.01	0	0	0	0.01	0	0.01	0	0	0	0	0	0	0	0	0	0.01	0	0.01	0	0	0
	140	141	GLU	373	0	0	0	0	0	0	0	0	0	0	0	0	-3.14	0.52	-0.43	0.07	-3.57	0.59	-3.14	0.52	-0.43	0.07	-3.57	0.59	3.1	0.51	0.43	0.07	3.53	0.58	0	0	0	0	0	0	3.1	0.51	0.43	0.07	3.53	0.58	-0.04	0.01	-0.01
	141	142	ASN	374	0	0	0	0	0	0	0	0	0	0	0	0	-0.01	0.02	0.03	0.02	0.02	0.02	-0.01	0.02	0.03	0.02	0.02	0.02	0.01	0.02	-0.03	0.02	-0.02	0.02	0	0	0	0	0	0	0.01	0.02	-0.03	0.02	-0.02	0.02	0	0	0
	142	143	HIS	375	0	0	0	0	0	0	0	0	0	0	0	0	0.08	0.02	-0.1	0.02	-0.02	0.02	0.08	0.02	-0.1	0.02	-0.02	0.02	-0.07	0.02	0.1	0.02	0.02	0.02	0	0	0	0	0	0	-0.07	0.02	0.1	0.02	0.02	0.02	0	0	0
	143	144	LEU	376	0	0	0	0	0	0	0	0	0	0	0	0	0.27	0.04	-0.3	0.06	-0.03	0.02	0.27	0.04	-0.3	0.06	-0.03	0.02	-0.27	0.04	0.29	0.06	0.03	0.02	0	0	0	0	0	0	-0.27	0.04	0.29	0.06	0.03	0.02	0	0	0
	144	145	VAL	377	0	0	0	0	0	0	0	0	0	0	0	0	0.4	0.07	-0.36	0.06	0.04	0.02	0.4	0.07	-0.36	0.06	0.04	0.02	-0.39	0.07	0.36	0.06	-0.04	0.02	0	0	0	0	0	0	-0.39	0.07	0.36	0.06	-0.04	0.02	0	0	0
	145	146	LYS	378	0	0	0	0	0	0	0	0	0	0	0	0	4.12	0.74	-0.12	0.03	4	0.71	4.12	0.74	-0.12	0.03	4	0.71	-4.07	0.73	0.12	0.03	-3.95	0.7	0	0	0	0	0	0	-4.07	0.73	0.12	0.03	-3.95	0.7	0.05	0.01	0
	146	147	VAL	379	0	0	0	0	0	0	0	0	0	0	0	0	0.44	0.1	-0.44	0.08	0	0.03	0.44	0.1	-0.44	0.08	0	0.03	-0.44	0.1	0.44	0.08	0	0.03	0	0	0	0	0	0	-0.44	0.1	0.44	0.08	0	0.03	0.01	0	-0.01
	147	148	ALA	380	0	0	0	0	0	0	0	0	0	0	0	0	0	0	0.06	0.03	0.06	0.03	0	0	0.06	0.03	0.06	0.03	0	0	-0.06	0.03	-0.06	0.03	0	0	0	0	0	0	0	0	-0.06	0.03	-0.06	0.03	0	0	0
	148	149	ASP	381	0	0	0	0	0	0	0	0	0	0	0	0	-4.56	1.47	-0.72	0.19	-5.28	1.65	-4.56	1.47	-0.72	0.19	-5.28	1.65	4.5	1.46	0.71	0.18	5.21	1.63	0	0	0	0	0	0	4.5	1.46	0.71	0.18	5.21	1.63	-0.06	0.02	-0.01
	149	150	PHE	382	0	0	0	0	0	0	0	0	0	0	0	0	0.1	0.03	-0.23	0.13	-0.12	0.1	0.1	0.03	-0.23	0.13	-0.12	0.1	-0.1	0.03	0.22	0.13	0.12	0.1	0	0	0	0	0	0	-0.1	0.03	0.22	0.13	0.12	0.1	0	0	0
	150	151	GLY	383	0	0	0	0	0	0	0	0	0	0	0	0	0	0	-0.14	0.14	-0.14	0.14	0	0	-0.14	0.14	-0.14	0.14	0	0	0.14	0.14	0.14	0.14	0	0	0	0	0	0	0	0	0.14	0.14	0.14	0.14	0	0	0
	151	152	LEU	384	0	0	0	0	0	0	0	0	0	0	0	0	0.43	0.15	-0.55	0.28	-0.13	0.13	0.43	0.15	-0.55	0.28	-0.13	0.14	-0.42	0.15	0.55	0.28	0.13	0.13	0	0	0	0	0	0	-0.42	0.15	0.55	0.28	0.13	0.13	0.01	0	-0.01
	152	153	SER	385	0	0	0	0	0	0	0	0	0	0	0	0	0.26	0.08	-0.36	0.18	-0.1	0.11	0.26	0.08	-0.36	0.18	-0.1	0.11	-0.26	0.08	0.36	0.17	0.1	0.11	0	0	0	0	0	0	-0.26	0.08	0.36	0.17	0.1	0.11	0	0	0
	153	154	ARG	386	0	0	0	0	0	0	0	0	0	0	0	0	6.68	2.94	-0.36	0.27	6.32	2.68	6.68	2.93	-0.36	0.27	6.32	2.68	-6.6	2.89	0.36	0.27	-6.24	2.64	0	0	0	0	0	0	-6.6	2.89	0.36	0.27	-6.24	2.64	0.09	0.04	0
	154	155	LEU	387	0	0	0	0	0	0	0	0.01	0	0	0	0.01	0.53	0.25	-0.7	0.45	-0.17	0.22	0.53	0.24	-0.7	0.46	-0.18	0.22	-0.52	0.24	0.7	0.46	0.17	0.22	0	0	0	0	0	0	-0.52	0.24	0.7	0.46	0.17	0.22	0.01	0	-0.01
	155	156	MET	388	0	0	0	0	0	0	0	0	0	0	0	0	0.35	0.2	-0.31	0.15	0.04	0.14	0.35	0.2	-0.31	0.15	0.04	0.14	-0.34	0.19	0.3	0.15	-0.04	0.14	0	0	0	0	0	0	-0.34	0.19	0.3	0.15	-0.04	0.14	0	0	0
	156	157	THR	389	0	0	0	0	0	0	0	0	0	0	0	0	0.34	0.15	-0.4	0.19	-0.06	0.07	0.34	0.15	-0.4	0.19	-0.06	0.07	-0.33	0.15	0.4	0.18	0.06	0.07	0	0	0	0	0	0	-0.33	0.15	0.4	0.18	0.06	0.07	0.01	0	0
	157	158	GLY	390	0	0	0	0	0	0	0	0	0	0	0	0	0	0	-0.02	0.05	-0.02	0.05	0	0	-0.02	0.05	-0.02	0.05	0	0	0.02	0.05	0.02	0.05	0	0	0	0	0	0	0	0	0.02	0.05	0.02	0.05	0	0	0
	158	159	ASP	391	0	0	0	0	0	0	0	0	0	0	0	0	-3.82	1.06	-0.64	0.2	-4.46	1.26	-3.82	1.06	-0.64	0.2	-4.46	1.26	3.77	1.05	0.64	0.2	4.41	1.24	0	0	0	0	0	0	3.77	1.05	0.64	0.2	4.41	1.24	-0.05	0.01	-0.01
	159	160	THR	392	0	0	0	0	0	0	0	0	0	0	0	0	0.29	0.11	-0.19	0.05	0.11	0.08	0.29	0.11	-0.19	0.05	0.11	0.08	-0.29	0.11	0.18	0.05	-0.11	0.08	0	0	0	0	0	0	-0.29	0.11	0.18	0.05	-0.11	0.08	0	0	0
	160	161	TYR	393	0	0	0	0	0	0	0	0	0	0	0	0	0.13	0.05	-0.22	0.12	-0.09	0.08	0.13	0.05	-0.22	0.12	-0.09	0.08	-0.13	0.05	0.22	0.12	0.09	0.08	0	0	0	0	0	0	-0.13	0.05	0.22	0.12	0.09	0.08	0	0	0
	161	162	THR	394	0	0	0	0	0	0	0	0	0	0	0	0	0.26	0.08	-0.29	0.12	-0.02	0.07	0.26	0.08	-0.29	0.12	-0.02	0.07	-0.26	0.08	0.28	0.12	0.02	0.07	0	0	0	0	0	0	-0.26	0.08	0.28	0.12	0.02	0.07	0	0	0
	162	163	ALA	395	0	0	0	0	0	0	0	0	0	0	0	0	0	0.01	0	0.05	0.01	0.05	0	0.01	0	0.05	0.01	0.05	0	0.01	0	0.05	-0.01	0.05	0	0	0	0	0	0	0	0.01	0	0.05	-0.01	0.05	0	0	0
	163	164	HIS	396	0	0	0	0	0	0	0	0	0	0	0	0	0.08	0.03	-0.2	0.09	-0.12	0.09	0.08	0.03	-0.2	0.09	-0.12	0.09	-0.08	0.03	0.2	0.09	0.12	0.09	0	0	0	0	0	0	-0.08	0.03	0.2	0.09	0.12	0.09	0	0	0
	164	165	ALA	397	0	0	0	0	0	0	0	0	0	0	0	0	-0.01	0.01	0.03	0.03	0.01	0.03	-0.01	0.01	0.03	0.03	0.01	0.03	0.01	0.01	-0.03	0.03	-0.01	0.03	0	0	0	0	0	0	0.01	0.01	-0.03	0.03	-0.01	0.03	0	0	0
	165	166	GLY	398	0	0	0	0	0	0	0	0	0	0	0	0	0	0	-0.03	0.07	-0.03	0.07	0	0	-0.03	0.07	-0.03	0.07	0	0	0.03	0.07	0.03	0.07	0	0	0	0	0	0	0	0	0.03	0.07	0.03	0.07	0	0	0
	166	167	ALA	399	0	0	0	0	0	0	0	0	0	0	0	0	-0.02	0.01	0.06	0.06	0.04	0.05	-0.02	0.01	0.06	0.06	0.04	0.05	0.02	0.01	-0.06	0.06	-0.04	0.05	0	0	0	0	0	0	0.02	0.01	-0.06	0.06	-0.04	0.05	0	0	0
	167	168	LYS	400	0	0	0	0	0	0	0	0	0	0	0	0	6.38	2.92	-0.15	0.07	6.23	2.86	6.38	2.92	-0.15	0.07	6.23	2.85	-6.3	2.87	0.15	0.07	-6.15	2.81	0	0	0	0	0	0	-6.3	2.87	0.15	0.07	-6.15	2.81	0.08	0.04	0
	168	169	PHE	401	0	0	0	0	0	0	0	0	0	0	0	0	0.08	0.02	-0.1	0.05	-0.02	0.03	0.08	0.02	-0.1	0.05	-0.02	0.03	-0.08	0.02	0.1	0.05	0.02	0.03	0	0	0	0	0	0	-0.08	0.02	0.1	0.05	0.02	0.03	0	0	0
	169	170	PRO	402	0	0	0	0	0	0	0	0	0	0	0	0	0.98	0.33	-0.93	0.3	0.05	0.03	0.98	0.33	-0.93	0.3	0.05	0.03	-0.97	0.32	0.92	0.29	-0.05	0.03	0	0	0	0	0	0	-0.97	0.32	0.92	0.29	-0.05	0.03	0.01	0	-0.01
	170	171	ILE	403	0	0	0	0	0	0	0	0	0	0	0	0	0.38	0.12	-0.33	0.08	0.05	0.04	0.38	0.12	-0.33	0.08	0.05	0.04	-0.38	0.11	0.32	0.08	-0.05	0.04	0	0	0	0	0	0	-0.38	0.11	0.32	0.08	-0.05	0.04	0	0	0
	171	172	LYS	404	0	0	0	0	0	0	0	0	0	0	0	0	4.14	1.04	-0.04	0.01	4.09	1.05	4.14	1.04	-0.04	0.01	4.09	1.05	-4.08	1.02	0.04	0.01	-4.04	1.03	0	0	0	0	0	0	-4.08	1.02	0.04	0.01	-4.04	1.03	0.05	0.01	0
	172	173	TRP	405	0	0	0	0	0	0	0	0	0	0	0	0	0.1	0.02	-0.09	0.02	0.01	0.02	0.1	0.02	-0.09	0.02	0.01	0.02	-0.1	0.02	0.09	0.02	-0.01	0.02	0	0	0	0	0	0	-0.1	0.02	0.09	0.02	-0.01	0.02	0	0	0
	173	174	THR	406	0	0	0	0	0	0	0	0	0	0	0	0	0.19	0.04	-0.16	0.03	0.03	0.03	0.19	0.04	-0.16	0.03	0.03	0.03	-0.19	0.04	0.16	0.03	-0.03	0.03	0	0	0	0	0	0	-0.19	0.04	0.16	0.03	-0.03	0.03	0	0	0
	174	175	ALA	407	0	0	0	0	0	0	0	0	0	0	0	0	-0.01	0	-0.05	0.04	-0.06	0.04	-0.01	0	-0.05	0.04	-0.06	0.04	0.01	0	0.05	0.04	0.05	0.04	0	0	0	0	0	0	0.01	0	0.05	0.04	0.05	0.04	0	0	0
	175	176	PRO	408	0	0	0	0	0	0	0	0	0	0	0	0	0.74	0.18	-0.79	0.22	-0.05	0.04	0.74	0.18	-0.79	0.22	-0.05	0.04	-0.73	0.18	0.78	0.21	0.05	0.03	0	0	0	0	0	0	-0.73	0.18	0.78	0.21	0.05	0.03	0.01	0	-0.01
	176	177	GLU	409	0	0	0	0	0	0	0	0	0	0	0	0	-3.31	0.84	-0.49	0.15	-3.8	1	-3.31	0.84	-0.49	0.15	-3.8	1	3.27	0.83	0.48	0.15	3.75	0.98	0	0	0	0	0	0	3.27	0.83	0.48	0.15	3.75	0.98	-0.04	0.01	-0.01
	177	178	SER	410	0	0	0	0	0	0	0	0	0	0	0	0	0.25	0.09	-0.28	0.11	-0.02	0.02	0.25	0.09	-0.28	0.11	-0.02	0.02	-0.25	0.09	0.27	0.11	0.02	0.02	0	0	0	0	0	0	-0.25	0.09	0.27	0.11	0.02	0.02	0	0	0
	178	179	LEU	411	0	0	0	0	0	0	0	0	0	0	0	0	0.3	0.09	-0.36	0.14	-0.06	0.05	0.3	0.09	-0.36	0.14	-0.06	0.05	-0.29	0.08	0.35	0.13	0.06	0.05	0	0	0	0	0	0	-0.29	0.08	0.35	0.13	0.06	0.05	0	0	0
	179	180	ALA	412	0	0	0	0	0	0	0	0	0	0	0	0	-0.01	0.01	-0.01	0.03	-0.03	0.03	-0.01	0.01	-0.01	0.03	-0.03	0.03	0.01	0.01	0.01	0.03	0.03	0.03	0	0	0	0	0	0	0.01	0.01	0.01	0.03	0.03	0.03	0	0	0
	180	181	TYR	413	0	0	0	0	0	0	0	0	0	0	0	0	0.11	0.04	-0.12	0.04	-0.01	0.02	0.11	0.04	-0.12	0.04	-0.01	0.02	-0.11	0.04	0.12	0.04	0.01	0.02	0	0	0	0	0	0	-0.11	0.04	0.12	0.04	0.01	0.02	0	0	0
	181	182	ASN	414	0	0	0	0	0	0	0	0	0	0	0	0	-0.02	0.05	-0.02	0.03	-0.04	0.04	-0.02	0.05	-0.02	0.03	-0.04	0.04	0.02	0.04	0.02	0.03	0.04	0.04	0	0	0	0	0	0	0.02	0.04	0.02	0.03	0.04	0.04	0	0	0
	182	183	LYS	415	0	0	0	0	0	0	0	0	0	0	0	0	3.89	1.1	-0.11	0.04	3.78	1.06	3.89	1.1	-0.11	0.04	3.78	1.06	-3.84	1.09	0.11	0.04	-3.73	1.05	0	0	0	0	0	0	-3.84	1.09	0.11	0.04	-3.73	1.05	0.05	0.01	0
	183	184	PHE	416	0	0	0	0	0	0	0	0	0	0	0	0	0.09	0.03	-0.09	0.04	0	0.02	0.09	0.03	-0.09	0.04	0	0.02	-0.09	0.03	0.09	0.04	0	0.02	0	0	0	0	0	0	-0.09	0.03	0.09	0.04	0	0.02	0	0	0
	184	185	SER	417	0	0	0	0	0	0	0	0	0	0	0	0	0.21	0.06	-0.25	0.08	-0.04	0.03	0.21	0.06	-0.25	0.08	-0.04	0.03	-0.21	0.06	0.25	0.08	0.04	0.03	0	0	0	0	0	0	-0.21	0.06	0.25	0.08	0.04	0.03	0	0	0
	185	186	ILE	418	0	0	0	0	0	0	0	0	0	0	0	0	0.33	0.08	-0.34	0.08	-0.01	0.02	0.33	0.08	-0.34	0.08	-0.01	0.02	-0.33	0.08	0.33	0.08	0	0.02	0	0	0	0	0	0	-0.33	0.08	0.33	0.08	0	0.02	0	0	0
	186	187	LYS	419	0	0	0	0	0	0	0	0	0	0	0	0	3.45	0.7	-0.07	0.01	3.38	0.7	3.45	0.7	-0.07	0.01	3.38	0.7	-3.4	0.69	0.06	0.01	-3.34	0.69	0	0	0	0	0	0	-3.4	0.69	0.06	0.01	-3.34	0.69	0.04	0.01	0
	187	188	SER	420	0	0	0	0	0	0	0	0	0	0	0	0	0.21	0.05	-0.2	0.05	0.01	0.01	0.21	0.05	-0.2	0.05	0.01	0.01	-0.21	0.05	0.2	0.05	-0.01	0.01	0	0	0	0	0	0	-0.21	0.05	0.2	0.05	-0.01	0.01	0	0	0
	188	189	ASP	421	0	0	0	0	0	0	0	0	0	0	0	0	-3.68	1	-0.55	0.13	-4.24	1.14	-3.68	1	-0.55	0.13	-4.24	1.14	3.64	0.99	0.55	0.13	4.19	1.12	0	0	0	0	0	0	3.64	0.99	0.55	0.13	4.19	1.12	-0.05	0.01	-0.01
	189	190	VAL	422	0	0	0	0	0	0	0	0	0	0	0	0	0.38	0.08	-0.38	0.08	0	0.01	0.38	0.08	-0.38	0.08	0	0.01	-0.37	0.08	0.37	0.08	0	0.01	0	0	0	0	0	0	-0.37	0.08	0.37	0.08	0	0.01	0	0	0
	190	191	TRP	423	0	0	0	0	0	0	0	0	0	0	0	0	0.13	0.04	-0.08	0.01	0.05	0.04	0.13	0.04	-0.08	0.01	0.05	0.04	-0.13	0.04	0.08	0.01	-0.05	0.04	0	0	0	0	0	0	-0.13	0.04	0.08	0.01	-0.05	0.04	0	0	0
	191	192	ALA	424	0	0	0	0	0	0	0	0	0	0	0	0	0	0	0.03	0.02	0.03	0.02	0	0	0.03	0.02	0.03	0.02	0	0	-0.03	0.02	-0.03	0.02	0	0	0	0	0	0	0	0	-0.03	0.02	-0.03	0.02	0	0	0
	192	193	PHE	425	0	0	0	0	0	0	0	0	0	0	0	0	0.07	0.01	-0.06	0.01	0.01	0.01	0.07	0.01	-0.06	0.01	0.01	0.01	-0.07	0.01	0.06	0.01	-0.01	0.01	0	0	0	0	0	0	-0.07	0.01	0.06	0.01	-0.01	0.01	0	0	0
	193	194	GLY	426	0	0	0	0	0	0	0	0	0	0	0	0	0	0	0.02	0.02	0.02	0.02	0	0	0.02	0.02	0.02	0.02	0	0	-0.02	0.02	-0.02	0.02	0	0	0	0	0	0	0	0	-0.02	0.02	-0.02	0.02	0	0	0
	194	195	VAL	427	0	0	0	0	0	0	0	0	0	0	0	0	0.4	0.09	-0.37	0.07	0.03	0.03	0.4	0.09	-0.37	0.07	0.03	0.03	-0.39	0.09	0.36	0.07	-0.03	0.02	0	0	0	0	0	0	-0.39	0.09	0.36	0.07	-0.03	0.02	0	0	0
	195	196	LEU	428	0	0	0	0	0	0	0	0	0	0	0	0	0.28	0.06	-0.27	0.05	0.02	0.02	0.28	0.06	-0.27	0.05	0.02	0.02	-0.28	0.06	0.26	0.05	-0.02	0.02	0	0	0	0	0	0	-0.28	0.06	0.26	0.05	-0.02	0.02	0	0	0
	196	197	LEU	429	0	0	0	0	0	0	0	0	0	0	0	0	0.25	0.05	-0.24	0.04	0.01	0.02	0.25	0.05	-0.24	0.04	0.01	0.02	-0.25	0.05	0.24	0.04	-0.01	0.02	0	0	0	0	0	0	-0.25	0.05	0.24	0.04	-0.01	0.02	0	0	0
	197	198	TRP	430	0	0	0	0	0	0	0	0	0	0	0	0	0.08	0.01	-0.08	0.01	0	0.02	0.08	0.01	-0.08	0.01	0	0.02	-0.07	0.01	0.08	0.01	0	0.02	0	0	0	0	0	0	-0.07	0.01	0.08	0.01	0	0.02	0	0	0
	198	199	GLU	431	0	0	0	0	0	0	0	0	0	0	0	0	-3.58	0.84	-0.4	0.07	-3.98	0.91	-3.58	0.84	-0.4	0.07	-3.98	0.91	3.53	0.83	0.4	0.07	3.93	0.9	0	0	0	0	0	0	3.53	0.83	0.4	0.07	3.93	0.9	-0.04	0.01	-0.01
	199	200	ILE	432	0	0	0	0	0	0	0	0	0	0	0	0	0.31	0.06	-0.3	0.05	0.01	0.01	0.31	0.06	-0.3	0.05	0.01	0.01	-0.3	0.06	0.3	0.05	-0.01	0.01	0	0	0	0	0	0	-0.3	0.06	0.3	0.05	-0.01	0.01	0	0	0
	200	201	ALA	433	0	0	0	0	0	0	0	0	0	0	0	0	-0.01	0	0.03	0.02	0.03	0.01	-0.01	0	0.03	0.02	0.03	0.01	0.01	0	-0.03	0.02	-0.03	0.01	0	0	0	0	0	0	0.01	0	-0.03	0.02	-0.03	0.01	0	0	0
	201	202	THR	434	0	0	0	0	0	0	0	0	0	0	0	0	0.15	0.03	-0.17	0.03	-0.02	0.02	0.15	0.03	-0.17	0.03	-0.02	0.02	-0.15	0.03	0.17	0.03	0.02	0.02	0	0	0	0	0	0	-0.15	0.03	0.17	0.03	0.02	0.02	0	0	0
	202	203	TYR	435	0	0	0	0	0	0	0	0	0	0	0	0	0.09	0.02	-0.1	0.02	-0.02	0.02	0.09	0.02	-0.1	0.02	-0.02	0.02	-0.08	0.02	0.1	0.02	0.02	0.02	0	0	0	0	0	0	-0.08	0.02	0.1	0.02	0.02	0.02	0	0	0
	203	204	GLY	436	0	0	0	0	0	0	0	0	0	0	0	0	0	0	-0.03	0.02	-0.03	0.02	0	0	-0.03	0.02	-0.03	0.02	0	0	0.03	0.02	0.03	0.02	0	0	0	0	0	0	0	0	0.03	0.02	0.03	0.02	0	0	0
	204	205	MET	437	0	0	0	0	0	0	0	0	0	0	0	0	0.18	0.04	-0.2	0.05	-0.03	0.02	0.18	0.04	-0.2	0.05	-0.03	0.02	-0.17	0.04	0.2	0.05	0.03	0.02	0	0	0	0	0	0	-0.17	0.04	0.2	0.05	0.03	0.02	0	0	0
	205	206	SER	438	0	0	0	0	0	0	0	0	0	0	0	0	0.2	0.05	-0.15	0.02	0.05	0.03	0.2	0.05	-0.15	0.02	0.05	0.03	-0.2	0.05	0.15	0.02	-0.05	0.03	0	0	0	0	0	0	-0.2	0.05	0.15	0.02	-0.05	0.03	0	0	0
	206	207	PRO	439	0	0	0	0	0	0	0	0	0	0	0	0	0.79	0.18	-0.81	0.2	-0.03	0.02	0.79	0.18	-0.81	0.2	-0.03	0.02	-0.78	0.18	0.8	0.19	0.03	0.02	0	0	0	0	0	0	-0.78	0.18	0.8	0.19	0.03	0.02	0.01	0	-0.01
	207	208	TYR	440	0	0	0	0	0	0	0	0	0	0	0	0	0.11	0.04	-0.15	0.05	-0.04	0.02	0.11	0.04	-0.15	0.05	-0.04	0.02	-0.11	0.04	0.15	0.05	0.04	0.02	0	0	0	0	0	0	-0.11	0.04	0.15	0.05	0.04	0.02	0	0	0
	208	209	PRO	441	0	0	0	0	0	0	0	0	0	0	0	0	0.7	0.14	-0.68	0.14	0.01	0.02	0.7	0.14	-0.68	0.14	0.01	0.02	-0.69	0.14	0.67	0.14	-0.01	0.02	0	0	0	0	0	0	-0.69	0.14	0.67	0.14	-0.01	0.02	0.01	0	-0.01
	209	210	GLY	442	0	0	0	0	0	0	0	0	0	0	0	0	0	0	0.02	0.02	0.02	0.02	0	0	0.02	0.02	0.02	0.02	0	0	-0.02	0.02	-0.02	0.02	0	0	0	0	0	0	0	0	-0.02	0.02	-0.02	0.02	0	0	0
	210	211	ILE	443	0	0	0	0	0	0	0	0	0	0	0	0	0.31	0.07	-0.34	0.08	-0.02	0.02	0.31	0.07	-0.34	0.08	-0.02	0.02	-0.31	0.07	0.33	0.08	0.02	0.02	0	0	0	0	0	0	-0.31	0.07	0.33	0.08	0.02	0.02	0	0	0
	211	212	ASP	444	0	0	0	0	0	0	0	0	0	0	0	0	-3.37	0.86	-0.52	0.12	-3.88	0.98	-3.37	0.86	-0.52	0.12	-3.88	0.98	3.33	0.85	0.51	0.12	3.84	0.97	0	0	0	0	0	0	3.33	0.85	0.51	0.12	3.84	0.97	-0.04	0.01	-0.01
	212	213	LEU	445	0	0	0	0	0	0	0	0	0	0	0	0	0.32	0.09	-0.3	0.09	0.02	0.02	0.32	0.09	-0.3	0.09	0.02	0.02	-0.32	0.09	0.3	0.08	-0.02	0.02	0	0	0	0	0	0	-0.32	0.09	0.3	0.08	-0.02	0.02	0	0	0
	213	214	SER	446	0	0	0	0	0	0	0	0	0	0	0	0	0.23	0.05	-0.23	0.07	0	0.05	0.23	0.05	-0.23	0.07	0	0.05	-0.23	0.05	0.23	0.07	0	0.05	0	0	0	0	0	0	-0.23	0.05	0.23	0.07	0	0.05	0	0	0
	214	215	GLN	447	0	0	0	0	0	0	0	0	0	0	0	0	0.12	0.06	-0.1	0.03	0.01	0.05	0.12	0.06	-0.1	0.03	0.01	0.05	-0.11	0.06	0.1	0.03	-0.01	0.05	0	0	0	0	0	0	-0.11	0.06	0.1	0.03	-0.01	0.05	0	0	0
	215	216	VAL	448	0	0	0	0	0	0	0	0	0	0	0	0	0.41	0.11	-0.37	0.09	0.04	0.03	0.41	0.11	-0.37	0.09	0.04	0.03	-0.41	0.11	0.36	0.09	-0.04	0.03	0	0	0	0	0	0	-0.41	0.11	0.36	0.09	-0.04	0.03	0.01	0	0
	216	217	TYR	449	0	0	0	0	0	0	0	0	0	0	0	0	0.13	0.05	-0.09	0.02	0.04	0.03	0.13	0.05	-0.09	0.02	0.04	0.03	-0.13	0.05	0.09	0.02	-0.04	0.03	0	0	0	0	0	0	-0.13	0.05	0.09	0.02	-0.04	0.03	0	0	0
	217	218	GLU	450	0	0	0	0	0	0	0	0	0	0	0	0	-3.05	0.75	-0.41	0.1	-3.46	0.86	-3.05	0.75	-0.41	0.1	-3.46	0.86	3.01	0.74	0.41	0.1	3.42	0.84	0	0	0	0	0	0	3.01	0.74	0.41	0.1	3.42	0.84	-0.04	0.01	-0.01
	218	219	LEU	451	0	0	0	0	0	0	0	0	0	0	0	0	0.26	0.06	-0.22	0.04	0.04	0.02	0.26	0.06	-0.22	0.04	0.04	0.02	-0.26	0.06	0.22	0.04	-0.04	0.02	0	0	0	0	0	0	-0.26	0.06	0.22	0.04	-0.04	0.02	0	0	0
	219	220	LEU	452	0	0	0	0	0	0	0	0	0	0	0	0	0.28	0.08	-0.24	0.06	0.04	0.03	0.28	0.08	-0.24	0.06	0.04	0.03	-0.28	0.07	0.24	0.06	-0.04	0.03	0	0	0	0	0	0	-0.28	0.07	0.24	0.06	-0.04	0.03	0	0	0
	220	221	GLU	453	0	0	0	0	0	0	0	0	0	0	0	0	-3.21	0.85	-0.38	0.09	-3.59	0.93	-3.21	0.85	-0.38	0.09	-3.59	0.93	3.17	0.84	0.38	0.09	3.55	0.92	0	0	0	0	0	0	3.17	0.84	0.38	0.09	3.55	0.92	-0.04	0.01	0
	221	222	LYS	454	0	0	0	0	0	0	0	0	0	0	0	0	3.33	0.76	-0.05	0.01	3.28	0.76	3.33	0.76	-0.05	0.01	3.28	0.76	-3.28	0.76	0.05	0.01	-3.24	0.75	0	0	0	0	0	0	-3.28	0.76	0.05	0.01	-3.24	0.75	0.04	0.01	0
	222	223	ASP	455	0	0	0	0	0	0	0	0	0	0	0	0	-2.72	0.57	-0.41	0.08	-3.13	0.64	-2.72	0.57	-0.41	0.08	-3.13	0.64	2.69	0.56	0.41	0.07	3.09	0.63	0	0	0	0	0	0	2.69	0.56	0.41	0.07	3.09	0.63	-0.03	0.01	-0.01
	223	224	TYR	456	0	0	0	0	0	0	0	0	0	0	0	0	0.11	0.03	-0.12	0.03	0	0.01	0.11	0.03	-0.12	0.03	0	0.01	-0.11	0.03	0.11	0.03	0	0.01	0	0	0	0	0	0	-0.11	0.03	0.11	0.03	0	0.01	0	0	0
	224	225	ARG	457	0	0	0	0	0	0	0	0	0	0	0	0	3.33	0.69	-0.09	0.02	3.24	0.68	3.33	0.69	-0.09	0.02	3.24	0.68	-3.29	0.68	0.09	0.02	-3.2	0.67	0	0	0	0	0	0	-3.29	0.68	0.09	0.02	-3.2	0.67	0.04	0.01	0
	225	226	MET	458	0	0	0	0	0	0	0	0	0	0	0	0	0.16	0.03	-0.14	0.02	0.02	0.01	0.16	0.03	-0.14	0.02	0.02	0.01	-0.15	0.03	0.14	0.02	-0.02	0.01	0	0	0	0	0	0	-0.15	0.03	0.14	0.02	-0.02	0.01	0	0	0
	226	227	GLU	459	0	0	0	0	0	0	0	0	0	0	0	0	-2.55	0.42	-0.41	0.08	-2.96	0.5	-2.55	0.42	-0.41	0.08	-2.96	0.5	2.52	0.42	0.4	0.08	2.92	0.5	0	0	0	0	0	0	2.52	0.42	0.4	0.08	2.92	0.5	-0.03	0.01	-0.01
	227	228	ARG	460	0	0	0	0	0	0	0	0	0	0	0	0	2.9	0.46	-0.1	0.01	2.8	0.45	2.9	0.46	-0.1	0.01	2.8	0.45	-2.86	0.45	0.1	0.01	-2.76	0.44	0	0	0	0	0	0	-2.86	0.45	0.1	0.01	-2.76	0.44	0.04	0.01	0
	228	229	PRO	461	0	0	0	0	0	0	0	0	0	0	0	0	0.64	0.11	-0.61	0.1	0.03	0.02	0.64	0.11	-0.61	0.1	0.03	0.02	-0.63	0.11	0.6	0.1	-0.03	0.02	0	0	0	0	0	0	-0.63	0.11	0.6	0.1	-0.03	0.02	0.01	0	-0.01
	229	230	GLU	462	0	0	0	0	0	0	0	0	0	0	0	0	-2.53	0.38	-0.33	0.05	-2.87	0.43	-2.53	0.38	-0.33	0.05	-2.87	0.43	2.5	0.38	0.33	0.05	2.83	0.42	0	0	0	0	0	0	2.5	0.38	0.33	0.05	2.83	0.42	-0.03	0	0
	230	231	GLY	463	0	0	0	0	0	0	0	0	0	0	0	0	0	0	0.01	0.01	0.01	0.01	0	0	0.01	0.01	0.01	0.01	0	0	-0.01	0.01	-0.01	0.01	0	0	0	0	0	0	0	0	-0.01	0.01	-0.01	0.01	0	0	0
	231	232	CYS	464	0	0	0	0	0	0	0	0	0	0	0	0	-0.07	0.01	0.06	0.01	-0.01	0.01	-0.07	0.01	0.06	0.01	-0.01	0.01	0.06	0.01	-0.05	0.01	0.01	0.01	0	0	0	0	0	0	0.06	0.01	-0.05	0.01	0.01	0.01	0	0	0
	232	233	PRO	465	0	0	0	0	0	0	0	0	0	0	0	0	0.58	0.09	-0.62	0.1	-0.04	0.02	0.58	0.09	-0.62	0.1	-0.04	0.02	-0.57	0.09	0.61	0.1	0.04	0.02	0	0	0	0	0	0	-0.57	0.09	0.61	0.1	0.04	0.02	0.01	0	-0.01
	233	234	GLU	466	0	0	0	0	0	0	0	0	0	0	0	0	-2.35	0.33	-0.36	0.06	-2.71	0.38	-2.35	0.33	-0.36	0.06	-2.71	0.38	2.32	0.32	0.35	0.06	2.67	0.38	0	0	0	0	0	0	2.32	0.32	0.35	0.06	2.67	0.38	-0.03	0	0
	234	235	LYS	467	0	0	0	0	0	0	0	0	0	0	0	0	2.76	0.4	-0.08	0.02	2.68	0.39	2.76	0.4	-0.08	0.02	2.68	0.39	-2.73	0.4	0.08	0.02	-2.64	0.38	0	0	0	0	0	0	-2.73	0.4	0.08	0.02	-2.64	0.38	0.03	0	0
	235	236	VAL	468	0	0	0	0	0	0	0	0	0	0	0	0	0.32	0.05	-0.34	0.06	-0.02	0.01	0.32	0.05	-0.34	0.06	-0.02	0.01	-0.32	0.05	0.33	0.06	0.02	0.01	0	0	0	0	0	0	-0.32	0.05	0.33	0.06	0.02	0.01	0	0	0
	236	237	TYR	469	0	0	0	0	0	0	0	0	0	0	0	0	0.1	0.02	-0.11	0.03	-0.01	0.01	0.1	0.02	-0.11	0.03	-0.01	0.01	-0.1	0.02	0.11	0.03	0.01	0.01	0	0	0	0	0	0	-0.1	0.02	0.11	0.03	0.01	0.01	0	0	0
	237	238	GLU	470	0	0	0	0	0	0	0	0	0	0	0	0	-2.45	0.4	-0.37	0.07	-2.82	0.47	-2.45	0.4	-0.37	0.07	-2.82	0.47	2.42	0.4	0.36	0.07	2.79	0.47	0	0	0	0	0	0	2.42	0.4	0.36	0.07	2.79	0.47	-0.03	0.01	0
	238	239	LEU	471	0	0	0	0	0	0	0	0	0	0	0	0	0.23	0.04	-0.24	0.05	-0.01	0.02	0.23	0.04	-0.24	0.05	-0.01	0.02	-0.23	0.04	0.24	0.05	0.01	0.02	0	0	0	0	0	0	-0.23	0.04	0.24	0.05	0.01	0.02	0	0	0
	239	240	MET	472	0	0	0	0	0	0	0	0	0	0	0	0	0.16	0.03	-0.19	0.05	-0.03	0.02	0.16	0.03	-0.19	0.05	-0.03	0.02	-0.15	0.03	0.18	0.04	0.03	0.02	0	0	0	0	0	0	-0.15	0.03	0.18	0.04	0.03	0.02	0	0	0
	240	241	ARG	473	0	0	0	0	0	0	0	0	0	0	0	0	3	0.5	-0.13	0.03	2.87	0.47	3	0.5	-0.13	0.03	2.87	0.47	-2.96	0.5	0.12	0.03	-2.83	0.47	0	0	0	0	0	0	-2.96	0.5	0.12	0.03	-2.83	0.47	0.04	0.01	0
	241	242	ALA	474	0	0	0	0	0	0	0	0	0	0	0	0	-0.01	0	-0.01	0.01	-0.01	0.02	-0.01	0	-0.01	0.01	-0.01	0.02	0.01	0	0.01	0.01	0.01	0.02	0	0	0	0	0	0	0.01	0	0.01	0.01	0.01	0.02	0	0	0
	242	243	CYS	475	0	0	0	0	0	0	0	0	0	0	0	0	-0.07	0.01	0.04	0.01	-0.03	0.02	-0.07	0.01	0.04	0.01	-0.03	0.02	0.07	0.01	-0.04	0.01	0.03	0.02	0	0	0	0	0	0	0.07	0.01	-0.04	0.01	0.03	0.02	0	0	0
	243	244	TRP	476	0	0	0	0	0	0	0	0	0	0	0	0	0.13	0.04	-0.09	0.02	0.04	0.02	0.13	0.04	-0.09	0.02	0.04	0.02	-0.13	0.04	0.09	0.02	-0.04	0.02	0	0	0	0	0	0	-0.13	0.04	0.09	0.02	-0.04	0.02	0	0	0
	244	245	GLN	477	0	0	0	0	0	0	0	0	0	0	0	0	0.1	0.02	-0.15	0.04	-0.05	0.03	0.1	0.02	-0.15	0.04	-0.05	0.03	-0.1	0.02	0.15	0.04	0.05	0.03	0	0	0	0	0	0	-0.1	0.02	0.15	0.04	0.05	0.03	0	0	0
	245	246	TRP	478	0	0	0	0	0	0	0	0	0	0	0	0	0.09	0.02	-0.14	0.04	-0.05	0.03	0.09	0.02	-0.14	0.04	-0.05	0.03	-0.09	0.02	0.14	0.04	0.05	0.03	0	0	0	0	0	0	-0.09	0.02	0.14	0.04	0.05	0.03	0	0	0
	246	247	ASN	479	0	0	0	0	0	0	0	0	0	0	0	0	-0.06	0.03	0.03	0.02	-0.03	0.03	-0.06	0.03	0.03	0.02	-0.03	0.03	0.06	0.03	-0.03	0.02	0.03	0.03	0	0	0	0	0	0	0.06	0.03	-0.03	0.02	0.03	0.03	0	0	0
	247	248	PRO	480	0	0	0	0	0	0	0	0	0	0	0	0	0.71	0.16	-0.69	0.15	0.02	0.02	0.71	0.16	-0.69	0.15	0.02	0.02	-0.7	0.16	0.68	0.15	-0.02	0.02	0	0	0	0	0	0	-0.7	0.16	0.68	0.15	-0.02	0.02	0.01	0	-0.01
	248	249	SER	481	0	0	0	0	0	0	0	0	0	0	0	0	0.16	0.03	-0.16	0.03	-0.01	0.02	0.16	0.03	-0.16	0.03	-0.01	0.02	-0.15	0.03	0.16	0.03	0.01	0.02	0	0	0	0	0	0	-0.15	0.03	0.16	0.03	0.01	0.02	0	0	0
	249	250	ASP	482	0	0	0	0	0	0	0	0	0	0	0	0	-2.54	0.47	-0.42	0.07	-2.96	0.54	-2.54	0.47	-0.42	0.07	-2.96	0.54	2.51	0.46	0.42	0.07	2.93	0.53	0	0	0	0	0	0	2.51	0.46	0.42	0.07	2.93	0.53	-0.03	0.01	-0.01
	250	251	ARG	483	0	0	0	0	0	0	0	0	0	0	0	0	3.67	0.84	-0.12	0.02	3.56	0.82	3.67	0.84	-0.12	0.02	3.56	0.82	-3.63	0.83	0.12	0.02	-3.51	0.81	0	0	0	0	0	0	-3.63	0.83	0.12	0.02	-3.51	0.81	0.05	0.01	0
	251	252	PRO	484	0	0	0	0	0	0	0	0	0	0	0	0	0.65	0.12	-0.69	0.14	-0.05	0.03	0.65	0.12	-0.69	0.14	-0.05	0.03	-0.64	0.12	0.69	0.14	0.05	0.03	0	0	0	0	0	0	-0.64	0.12	0.69	0.14	0.05	0.03	0.01	0	-0.01
	252	253	SER	485	0	0	0	0	0	0	0	0	0	0	0	0	0.18	0.04	-0.15	0.02	0.03	0.02	0.18	0.04	-0.15	0.02	0.03	0.02	-0.18	0.04	0.15	0.02	-0.03	0.02	0	0	0	0	0	0	-0.18	0.04	0.15	0.02	-0.03	0.02	0	0	0
	253	254	PHE	486	0	0	0	0	0	0	0	0	0	0	0	0	0.07	0.02	-0.04	0.01	0.03	0.02	0.07	0.02	-0.04	0.01	0.03	0.02	-0.07	0.02	0.04	0.01	-0.03	0.02	0	0	0	0	0	0	-0.07	0.02	0.04	0.01	-0.03	0.02	0	0	0
	254	255	ALA	487	0	0	0	0	0	0	0	0	0	0	0	0	-0.01	0	0.02	0.02	0.02	0.02	-0.01	0	0.02	0.02	0.02	0.02	0.01	0	-0.02	0.02	-0.02	0.02	0	0	0	0	0	0	0.01	0	-0.02	0.02	-0.02	0.02	0	0	0
	255	256	GLU	488	0	0	0	0	0	0	0	0	0	0	0	0	-2.71	0.46	-0.34	0.05	-3.05	0.51	-2.71	0.46	-0.34	0.05	-3.05	0.51	2.67	0.45	0.34	0.05	3.01	0.5	0	0	0	0	0	0	2.67	0.45	0.34	0.05	3.01	0.5	-0.03	0.01	0
	256	257	ILE	489	0	0	0	0	0	0	0	0	0	0	0	0	0.29	0.05	-0.25	0.04	0.04	0.02	0.29	0.05	-0.25	0.04	0.04	0.02	-0.28	0.05	0.25	0.04	-0.04	0.02	0	0	0	0	0	0	-0.28	0.05	0.25	0.04	-0.04	0.02	0	0	0
	257	258	HIS	490	0	0	0	0	0	0	0	0	0	0	0	0	0.11	0.04	-0.1	0.02	0.02	0.03	0.11	0.04	-0.1	0.02	0.02	0.03	-0.11	0.04	0.09	0.02	-0.02	0.03	0	0	0	0	0	0	-0.11	0.04	0.09	0.02	-0.02	0.03	0	0	0
	258	259	GLN	491	0	0	0	0	0	0	0	0	0	0	0	0	0.1	0.03	-0.07	0.02	0.02	0.03	0.1	0.03	-0.07	0.02	0.02	0.03	-0.1	0.03	0.07	0.02	-0.02	0.03	0	0	0	0	0	0	-0.1	0.03	0.07	0.02	-0.02	0.03	0	0	0
	259	260	ALA	492	0	0	0	0	0	0	0	0	0	0	0	0	0	0	0.04	0.02	0.03	0.02	0	0	0.04	0.02	0.03	0.02	0	0	-0.04	0.02	-0.03	0.02	0	0	0	0	0	0	0	0	-0.04	0.02	-0.03	0.02	0	0	0
	260	261	PHE	493	0	0	0	0	0	0	0	0	0	0	0	0	0.06	0.01	-0.04	0.01	0.02	0.01	0.06	0.01	-0.04	0.01	0.02	0.01	-0.06	0.01	0.04	0.01	-0.02	0.01	0	0	0	0	0	0	-0.06	0.01	0.04	0.01	-0.02	0.01	0	0	0
	261	262	GLU	494	0	0	0	0	0	0	0	0	0	0	0	0	-2.58	0.42	-0.32	0.05	-2.9	0.47	-2.58	0.42	-0.32	0.05	-2.9	0.47	2.54	0.42	0.32	0.05	2.86	0.47	0	0	0	0	0	0	2.54	0.42	0.32	0.05	2.86	0.47	-0.03	0.01	0
	262	263	THR	495	0	0	0	0	0	0	0	0	0	0	0	0	0.15	0.02	-0.12	0.02	0.02	0.01	0.15	0.02	-0.12	0.02	0.02	0.01	-0.14	0.02	0.12	0.02	-0.02	0.01	0	0	0	0	0	0	-0.14	0.02	0.12	0.02	-0.02	0.01	0	0	0
	263	264	MET	496	0	0	0	0	0	0	0	0	0	0	0	0	0.14	0.02	-0.12	0.02	0.02	0.01	0.14	0.02	-0.12	0.02	0.02	0.01	-0.13	0.02	0.12	0.02	-0.02	0.01	0	0	0	0	0	0	-0.13	0.02	0.12	0.02	-0.02	0.01	0	0	0
	264	265	PHE	497	0	0	0	0	0	0	0	0	0	0	0	0	-4.29	0.64	1.58	0.24	-2.71	0.4	-4.29	0.64	1.58	0.24	-2.71	0.4	4.23	0.63	-1.56	0.23	2.67	0.4	0	0	0	0	0	0	4.23	0.63	-1.56	0.23	2.67	0.4	-0.05	0.01	0.02
	265	266	LIG	498	0	0	0	0	0	0	-0.27	0.58	0	0	-0.27	0.58	-40.43	18.93	0	0	-40.43	18.93	-40.7	19.38	0	0	-40.7	19.38	39.98	18.73	0	0	39.98	18.73	-0.07	0.16	0	0	-0.07	0.16	39.91	18.59	0	0	39.91	18.59	-0.79	0.9	0
[truncated: 3 more columns]

## Sheet: T315I_methacholine
=>>	COMPLEX
	Number	Residue	Residue Name	Residue ID	SINT		BINT		TINT		SVDW		BVDW		TVDW		SELE		BELE		TELE		SGAS		BGAS		TGAS		SGB		BGB		TGB		SGBSUR		BGBSUR		TGBSUR		SGBSOL		BGBSOL		TGBSOL		SGBTOT		BGBTOT
	0	1	ASP	233	5.3	1.71	3.81	0.78	9.12	2.07	-1.14	0.74	-0.26	0.5	-1.4	1.04	-63.5	7.73	-17.61	1.84	-81.11	7.95	-59.33	7.92	-14.06	1.81	-73.39	7.98	-57.87	7.55	-5.95	1.73	-63.82	7.51	0.97	0.07	0.11	0.04	1.09	0.08	-56.89	7.57	-5.84	1.74	-62.74	7.51	-116.22	2.12	-19.9
	1	2	LYS	234	11.02	2.52	10.74	1.45	21.76	3.17	-0.8	0.8	-0.14	0.65	-0.95	1.14	12.09	5.12	-2.39	1.33	9.7	5.41	22.31	5.6	8.2	1.66	30.51	5.93	-38.7	5.14	-5.89	1.22	-44.59	5.37	1.06	0.1	0.23	0.05	1.29	0.11	-37.64	5.12	-5.66	1.21	-43.3	5.36	-15.33	2.66	2.54
	2	3	TRP	235	10.87	2.18	10.28	1.4	21.15	2.71	-5.49	0.78	-0.78	0.76	-6.27	1.01	8.4	2.03	-17.43	1.36	-9.02	2.2	13.78	2.71	-7.93	1.63	5.86	3.53	-4.4	1.6	-1.6	0.78	-6	1.5	0.42	0.09	0.01	0.01	0.42	0.09	-3.99	1.58	-1.59	0.78	-5.58	1.49	9.8	2.2	-9.52
	3	4	GLU	236	6.43	1.68	10.14	1.37	16.57	2.35	-1.37	0.91	-0.79	0.8	-2.15	1.43	-1.45	10.05	-4.79	1.85	-6.24	10.06	3.61	10.01	4.56	2.18	8.17	10.03	-61.86	9.81	-6.5	1.47	-68.36	9.81	0.49	0.16	0.11	0.04	0.6	0.16	-61.37	9.7	-6.39	1.46	-67.76	9.69	-57.75	1.69	-1.83
	4	5	MET	237	7.2	2.05	9.97	1.22	17.17	2.62	-6.14	0.72	-0.79	0.94	-6.93	1.24	-1.59	0.48	-6.53	1.8	-8.12	2.06	-0.53	2.18	2.65	2.54	2.13	3.54	1.25	0.37	-4.12	1.35	-2.87	1.5	0.03	0.02	0.05	0.02	0.08	0.03	1.28	0.36	-4.07	1.34	-2.8	1.49	0.75	2.19	-1.42
	5	6	GLU	238	6.21	2.11	10.36	1.46	16.57	2.62	-1.51	1.04	-1.37	0.83	-2.87	1.51	5.06	11.5	2.73	1.56	7.79	11.99	9.76	11.23	11.73	1.75	21.48	11.54	-67.8	10.44	-6.31	0.91	-74.11	10.59	0.56	0.14	0.01	0.02	0.57	0.15	-67.24	10.33	-6.3	0.91	-73.54	10.49	-57.48	2.82	5.43
	6	7	ARG	239	12.95	2.66	11.46	1.52	24.41	3.16	-2.82	1.09	-1.71	0.54	-4.53	1.26	-210.45	5.98	-4.7	1.27	-215.15	6.32	-200.32	5.99	5.05	1.72	-195.27	6.35	20.92	5.3	-4.51	0.97	16.41	5.45	0.68	0.07	0.07	0.03	0.75	0.07	21.6	5.28	-4.44	0.97	17.16	5.44	-178.72	2.58	0.61
	7	8	THR	240	6.6	1.26	10.52	1.29	17.12	1.79	-0.29	0.57	0.81	0.87	0.52	1.16	-21.36	1.87	-22.56	2.08	-43.92	2.65	-15.04	1.87	-11.23	2.03	-26.27	2.84	-2.77	1.22	-0.39	1.37	-3.16	1.69	0.67	0.07	0.11	0.03	0.78	0.07	-2.1	1.21	-0.29	1.35	-2.39	1.67	-17.15	1.55	-11.52
	8	9	ASP	241	4.34	1.54	10.56	1.43	14.9	2.32	-3.21	0.68	-1.69	0.94	-4.9	1.28	-13.52	6.44	-7.74	1.46	-21.26	7.04	-12.4	6.41	1.13	1.62	-11.26	6.66	-45.65	6.82	-3.73	0.84	-49.38	7.04	0.19	0.04	0.01	0.01	0.19	0.04	-45.47	6.8	-3.72	0.84	-49.18	7.02	-57.86	1.92	-2.58
	9	10	ILE	242	9.95	1.9	10.76	1.45	20.71	2.58	-4.58	0.92	-0.98	0.76	-5.56	1.34	-4.53	0.4	-6.05	1.36	-10.58	1.25	0.84	2.01	3.72	1.93	4.57	2.86	2.53	0.34	-5.06	0.93	-2.53	0.83	0	0	0.02	0.02	0.02	0.02	2.53	0.34	-5.04	0.93	-2.52	0.82	3.37	1.9	-1.32
	10	11	THR	243	6.81	1.5	10.97	1.41	17.78	2.18	-1.2	0.54	-0.75	0.79	-1.96	0.92	-23.66	2.23	-12.18	1.03	-35.84	2.54	-18.06	2.65	-1.97	1.55	-20.02	3.08	-0.52	1.58	-3.16	0.44	-3.67	1.54	0.39	0.05	0.03	0.01	0.41	0.05	-0.13	1.57	-3.13	0.44	-3.26	1.53	-18.19	1.72	-5.1
	11	12	MET	244	7.32	1.89	10.21	1.29	17.53	2.5	-4.93	0.73	-1.03	0.7	-5.97	1.06	0.46	0.53	2.34	0.83	2.81	0.93	2.85	2.12	11.52	1.66	14.37	2.78	-0.41	0.55	-5.38	0.68	-5.79	0.8	0.24	0.04	0.17	0.02	0.42	0.04	-0.17	0.56	-5.2	0.67	-5.37	0.79	2.68	2.05	6.32
	12	13	LYS	245	10.85	2.43	12.59	1.4	23.45	3.12	-1.99	1.14	-0.53	0.72	-2.53	1.47	-37.14	8.38	-3.99	0.95	-41.12	8.14	-28.28	8.53	8.08	1.48	-20.2	8.36	8.61	7.22	-4.98	0.86	3.63	6.88	0.62	0.07	0.26	0.04	0.88	0.07	9.23	7.18	-4.72	0.83	4.51	6.83	-19.05	2.72	3.36
	13	14	HIS	246	24.76	1.55	10.03	1.26	34.79	2.28	-3.64	0.68	-0.69	0.64	-4.33	1.05	-15.64	1.68	-4.5	0.91	-20.14	1.77	5.48	2.14	4.84	1.49	10.32	2.65	-0.99	1.24	-4.78	0.59	-5.77	1.23	0.54	0.05	0.06	0.02	0.61	0.06	-0.45	1.23	-4.72	0.58	-5.17	1.21	5.04	1.72	0.12
	14	15	LYS	247	11.19	2.5	10.3	1.32	21.48	2.87	-2.8	0.64	-1.92	0.68	-4.72	0.86	-15.06	6.91	-4.57	1.37	-19.63	6.79	-6.68	7.56	3.81	1.87	-2.87	7.69	-11.75	6.73	-2.98	0.81	-14.73	6.6	0.68	0.06	0.03	0.01	0.71	0.05	-11.08	6.71	-2.94	0.81	-14.02	6.59	-17.75	2.75	0.86
	15	16	LEU	248	8.66	1.79	9.68	1.17	18.34	2.2	-3.72	0.97	-2.35	0.87	-6.07	1.4	-26.41	0.44	-8.4	1.29	-34.81	1.29	-21.47	2.1	-1.07	1.72	-22.53	2.79	2.94	0.31	-3.6	0.63	-0.66	0.61	0.01	0.01	0	0	0.01	0.01	2.94	0.3	-3.6	0.63	-0.66	0.61	-18.52	2.02	-4.67
	16	17	GLY	249	0	0	7.99	1.35	7.99	1.35	0	0	-2.25	0.64	-2.25	0.64	0	0	-5.23	0.85	-5.23	0.85	0	0	0.51	1.56	0.51	1.56	0	0	-7.05	0.82	-7.05	0.82	0	0	0.22	0.05	0.22	0.05	0	0	-6.83	0.81	-6.83	0.81	0	0	-6.32
	17	18	GLY	250	0	0	8.26	1.56	8.26	1.56	0	0	-0.52	0.69	-0.52	0.69	0	0	-3.64	2.09	-3.64	2.09	0	0	4.1	2.8	4.1	2.8	0	0	-8.7	1.53	-8.7	1.53	0	0	0.5	0.05	0.5	0.05	0	0	-8.19	1.53	-8.19	1.53	0	0	-4.09
	18	19	GLY	251	0	0	9.62	1.37	9.62	1.37	0	0	-1.33	0.61	-1.33	0.61	0	0	-6.16	1.16	-6.16	1.16	0	0	2.13	1.68	2.13	1.68	0	0	-6.28	1.35	-6.28	1.35	0	0	0.36	0.04	0.36	0.04	0	0	-5.92	1.33	-5.92	1.33	0	0	-3.79
	19	20	GLN	252	12.95	2.02	10.1	1.55	23.04	2.65	-2.93	1.07	-0.28	0.63	-3.21	1.33	-76.36	1.92	-4.54	0.91	-80.9	2.23	-66.35	2.35	5.28	1.75	-61.07	2.97	1.9	1.45	-6.37	0.65	-4.48	1.76	0.23	0.04	0.26	0.03	0.49	0.05	2.13	1.42	-6.12	0.65	-3.99	1.74	-64.22	1.87	-0.84
	20	21	TYR	253	8.63	1.98	8.66	1.36	17.29	2.43	-4.51	0.88	-0.99	0.82	-5.5	1.31	-18.35	1.11	-2.88	0.91	-21.23	1.53	-14.23	2.06	4.79	1.71	-9.44	2.83	-2.15	0.46	-4.16	0.82	-6.31	1	0.06	0.02	0.05	0.03	0.11	0.03	-2.09	0.46	-4.1	0.81	-6.19	0.99	-16.32	2.04	0.69
	21	22	GLY	254	0	0	9.79	1.23	9.79	1.23	0	0	-1.55	0.62	-1.55	0.62	0	0	-10.57	2.07	-10.57	2.07	0	0	-2.33	2.22	-2.33	2.22	0	0	-2.31	1.53	-2.31	1.53	0	0	0.3	0.06	0.3	0.06	0	0	-2.01	1.52	-2.01	1.52	0	0	-4.35
	22	23	GLU	255	6.37	1.84	10.13	1.52	16.49	2.47	-0.69	1.13	-0.69	0.75	-1.38	1.46	-10.97	12.88	-1.44	1.29	-12.41	13.02	-5.3	13.04	8	1.8	2.7	13.41	-52.99	11.44	-7.33	0.94	-60.32	11.71	0.26	0.09	0.01	0.01	0.27	0.1	-52.73	11.38	-7.32	0.94	-60.05	11.65	-58.03	2.35	0.68
	23	24	VAL	256	5.84	1.72	9.64	1.16	15.49	2.16	-2.88	0.77	-1.02	0.81	-3.9	1.13	-18.87	0.53	-10.19	1.06	-29.06	0.9	-15.9	1.86	-1.57	1.49	-17.47	2.31	3.76	0.43	-3.74	0.61	0.01	0.38	0.02	0.02	0	0	0.02	0.02	3.78	0.42	-3.74	0.61	0.03	0.38	-12.13	1.79	-5.31
	24	25	TYR	257	8.49	1.9	10.68	1.23	19.17	2.26	-4.28	0.62	-2.62	0.65	-6.91	0.91	-16.36	1.34	-11.57	0.77	-27.93	1.56	-12.15	2.36	-3.51	1.29	-15.66	2.66	-4.75	0.98	-2.31	0.36	-7.07	1.02	0.36	0.07	0	0	0.36	0.07	-4.4	0.96	-2.31	0.36	-6.71	1	-16.55	2.06	-5.82
	25	26	GLU	258	6.04	1.7	9.48	1	15.52	2.08	-3.11	1.19	-2.15	0.83	-5.25	1.45	-7.93	8.16	-8.85	1.22	-16.77	8.3	-5	7.63	-1.52	1.73	-6.51	7.73	-52.73	7.34	-2.39	0.71	-55.12	7.43	0.12	0.04	0	0	0.12	0.04	-52.62	7.31	-2.39	0.71	-55	7.41	-57.61	2.1	-3.9
	26	27	GLY	259	0	0	8.49	1.51	8.49	1.51	0	0	-3.32	0.98	-3.32	0.98	0	0	-7.96	1.06	-7.96	1.06	0	0	-2.79	1.69	-2.79	1.69	0	0	-2.62	0.66	-2.62	0.66	0	0	0	0	0	0	0	0	-2.62	0.66	-2.62	0.66	0	0	-5.41
	27	28	VAL	260	6.15	1.69	10.04	1.31	16.19	2.37	-2	0.7	-1.63	0.79	-3.63	1.09	-17.79	0.47	-11.06	1.1	-28.86	1.02	-13.64	1.76	-2.65	1.66	-16.29	2.48	2.45	0.36	-3.14	0.7	-0.69	0.58	0.26	0.04	0	0	0.26	0.04	2.71	0.37	-3.14	0.7	-0.43	0.58	-10.94	1.7	-5.79
	28	29	TRP	261	11.52	2.58	11.43	1.13	22.95	3.03	-6.36	0.93	-2.98	0.82	-9.35	1.32	6.1	1.83	-5.75	1.08	0.35	2.1	11.26	3.44	2.7	1.49	13.96	3.77	-0.82	1.18	-0.6	0.42	-1.42	1.26	0.31	0.07	0	0	0.31	0.07	-0.51	1.16	-0.6	0.42	-1.11	1.24	10.75	2.91	2.1
	29	30	LYS	262	11.03	2.38	12.48	1.68	23.51	2.9	-2.24	1.08	-1.37	0.87	-3.61	1.32	-26.3	7.01	-0.73	1.25	-27.03	7.15	-17.51	7.15	10.38	1.78	-7.13	7.5	-0.2	6.72	-3.5	0.89	-3.7	6.85	0.68	0.06	0.11	0.02	0.79	0.06	0.48	6.69	-3.39	0.87	-2.91	6.82	-17.03	2.53	6.99
	30	31	LYS	263	11.13	2.48	11.41	1.52	22.55	2.8	-2.23	0.79	-0.27	0.69	-2.5	1.16	-11.28	7.93	-10.04	1.46	-21.33	7.95	-2.38	7.83	1.1	1.68	-1.28	7.86	-15.61	7.73	-4.24	0.8	-19.85	7.57	0.77	0.1	0.24	0.02	1.02	0.1	-14.84	7.7	-3.99	0.79	-18.83	7.54	-17.22	2.47	-2.89
	31	32	TYR	264	8.52	1.94	9.56	1.34	18.08	2.53	-0.18	0.65	0.23	0.84	0.04	1.11	-17.89	0.83	-9.21	0.81	-27.1	1.17	-9.56	1.99	0.58	1.51	-8.98	2.61	-4.67	0.71	-5.46	0.66	-10.12	0.96	0.86	0.06	0.19	0.03	1.05	0.07	-3.8	0.67	-5.26	0.65	-9.07	0.92	-13.36	2.02	-4.68
	32	33	SER	265	3.36	1.01	10.62	1.32	13.98	1.81	-0.17	0.43	-0.16	0.74	-0.34	0.98	-2.52	0.93	-4.48	1.6	-7	2	0.67	1.4	5.97	1.96	6.64	2.68	-3.04	0.92	-6.67	1	-9.71	1.45	0.54	0.04	0.16	0.04	0.7	0.06	-2.49	0.9	-6.51	0.98	-9.01	1.43	-1.83	1.08	-0.54
	33	34	LEU	266	9.07	2.15	10.55	1.35	19.62	2.44	-0.9	0.85	-0.61	0.87	-1.52	1.3	-25.79	0.39	-6.4	1.04	-32.19	1.17	-17.63	2.28	3.54	1.54	-14.09	2.65	1.85	0.28	-3.02	0.41	-1.17	0.46	0.59	0.06	0.03	0.02	0.62	0.05	2.45	0.26	-2.99	0.4	-0.54	0.45	-15.19	2.28	0.55
	34	35	THR	267	6.57	1.54	10.28	1.25	16.85	2.31	-2.24	0.43	-1.43	0.65	-3.67	0.81	-23.05	1.16	-8.59	0.64	-31.64	1.41	-18.72	1.76	0.26	1.47	-18.46	2.61	-0.75	0.71	-4.92	0.49	-5.67	0.83	0.31	0.04	0.06	0.03	0.36	0.05	-0.45	0.71	-4.86	0.48	-5.31	0.82	-19.17	1.53	-4.59
	35	36	VAL	268	5.91	1.96	9.82	1.25	15.73	2.48	-3.98	0.72	-1.12	0.98	-5.11	1.32	-19.15	0.38	-9.76	1.09	-28.91	1.11	-17.22	2.05	-1.07	1.63	-18.29	2.71	3.87	0.29	-4.54	0.53	-0.67	0.45	0	0	0	0	0	0	3.87	0.29	-4.54	0.53	-0.67	0.45	-13.35	2.07	-5.61
	36	37	ALA	269	2.7	0.89	9.97	1.44	12.67	1.93	-2.03	0.4	-2.22	0.86	-4.25	0.92	2.18	0.12	-7.62	0.76	-5.45	0.77	2.84	1.05	0.13	1.45	2.97	1.96	-0.12	0.05	-0.43	0.3	-0.55	0.32	0	0	0	0	0	0	-0.12	0.05	-0.43	0.3	-0.54	0.32	2.73	1.04	-0.3
	37	38	VAL	270	6.02	1.48	10.63	1.42	16.64	2.22	-3.98	0.74	-1.89	0.83	-5.88	1.16	-19.07	0.41	-4.3	1.05	-23.36	0.98	-17.03	1.68	4.44	1.41	-12.6	2.36	3.6	0.32	-4.09	0.53	-0.49	0.36	0	0	0	0	0	0	3.6	0.32	-4.09	0.53	-0.49	0.36	-13.44	1.67	0.35
	38	39	LYS	271	11.56	2.44	10.72	1.33	22.28	2.58	-3.38	1.2	-1.76	0.93	-5.14	1.47	-79.57	6.79	-9.1	0.99	-88.67	7.1	-71.39	7.22	-0.15	1.58	-71.53	7.57	50.75	5.61	-1.46	0.43	49.29	5.76	0.1	0.03	0	0	0.1	0.03	50.85	5.6	-1.46	0.43	49.39	5.75	-20.54	3.02	-1.61
	39	40	THR	272	6.19	1.42	10.53	1.34	16.72	2.03	-3.16	0.73	-2.01	0.71	-5.17	1.15	-23.2	0.73	-10.45	1.26	-33.65	1.55	-20.17	1.57	-1.93	1.83	-22.1	2.4	-1.05	0.5	-5.68	1.26	-6.72	1.47	0.04	0.02	0.02	0.02	0.06	0.02	-1.01	0.5	-5.66	1.26	-6.66	1.48	-21.18	1.51	-7.59
	40	41	LEU	273	9.11	1.83	10.86	1.4	19.97	2.65	-2.89	1.07	-0.53	0.85	-3.42	1.47	-27.9	0.44	6.41	1.21	-21.5	1.21	-21.68	2.23	16.74	1.82	-4.94	3.22	3.71	0.33	-8.69	1.04	-4.98	0.91	0.16	0.05	0.04	0.02	0.2	0.06	3.87	0.32	-8.66	1.03	-4.78	0.9	-17.81	2.22	8.08
	41	42	LYS	274	11.87	2.5	14	1.84	25.88	3.24	-0.94	0.97	-0.7	0.72	-1.65	1.27	-39.74	16.46	-10.14	0.83	-49.88	16.29	-28.81	16.36	3.16	1.86	-25.65	16.26	11.69	15.33	-4.2	0.73	7.49	15.05	0.81	0.14	0.16	0.03	0.97	0.13	12.5	15.27	-4.04	0.71	8.45	15	-16.31	2.91	-0.88
	42	43	GLU	275	5.81	1.84	9.71	1.4	15.52	2.37	-0.76	0.68	0.08	0.9	-0.68	1.25	30.57	12.61	-10.04	1.37	20.53	12.99	35.63	12.49	-0.25	2.01	35.37	13.2	-94.29	11.85	-8.68	0.99	-102.97	12.24	0.77	0.09	0.05	0.01	0.81	0.08	-93.52	11.78	-8.63	0.99	-102.15	12.17	-57.9	1.86	-8.88
	43	44	ASP	276	4.46	1.11	10.38	1.21	14.84	1.78	-1.09	0.44	-0.39	0.63	-1.47	0.92	28.08	3.45	6.2	2	34.28	4.83	31.46	3.48	16.2	2.35	47.65	5.08	-93.29	3.47	-18.23	1.54	-111.52	4.63	0.65	0.06	0.17	0.03	0.82	0.06	-92.64	3.48	-18.06	1.55	-110.7	4.64	-61.18	0.94	-1.87
	44	45	THR	277	6.13	1.63	10.59	1.24	16.72	2.26	-1.78	0.74	-0.33	0.72	-2.11	1.08	-25.16	1.26	-4.41	1.26	-29.57	1.84	-20.8	1.77	5.85	1.79	-14.96	2.48	0.92	0.67	-7.96	1.13	-7.04	1.29	0.2	0.05	0.11	0.04	0.31	0.05	1.12	0.68	-7.85	1.11	-6.73	1.26	-19.68	1.71	-2.01
	45	46	MET	278	7.4	2.24	11.07	1.41	18.47	2.87	-0.68	0.5	-0.07	0.68	-0.75	0.96	-2.12	1.18	-5.5	1.73	-7.62	2.39	4.61	2.66	5.49	2.28	10.1	4.07	0.97	1.09	-6.6	1.69	-5.63	2.25	1.15	0.07	0.2	0.05	1.35	0.09	2.12	1.07	-6.4	1.66	-4.28	2.2	6.72	2.37	-0.91
	46	47	GLU	279	6.39	2.01	10.9	1.4	17.28	2.67	-0.65	0.74	-0.21	0.71	-0.85	1.13	35.48	9.99	2.61	3.41	38.08	12.75	41.22	10.06	13.3	3.75	54.52	12.85	-97.82	10.56	-11.55	2.49	-109.37	12.52	0.79	0.16	0.08	0.04	0.87	0.19	-97.02	10.45	-11.47	2.46	-108.5	12.39	-55.81	2.11	1.82
	47	48	VAL	280	6.24	1.54	11.14	1.54	17.38	2.14	-1.3	0.65	0.02	1.03	-1.28	1.31	-21.02	0.67	-10.97	1.74	-31.99	1.67	-16.08	1.65	0.19	2.21	-15.89	2.53	5.74	0.55	-6.59	1.01	-0.86	0.91	0.28	0.08	0.01	0.01	0.29	0.07	6.02	0.55	-6.58	1.01	-0.57	0.89	-10.06	1.53	-6.39
	48	49	GLU	281	5.92	1.6	11.01	1.38	16.93	2.25	-0.76	0.69	-0.43	0.91	-1.19	1.24	22.14	8.42	-7.15	1.85	14.99	8.98	27.3	8.52	3.43	2.18	30.73	9.24	-85.38	8.28	-6.78	1.48	-92.17	8.65	0.82	0.1	0.03	0.02	0.85	0.1	-84.56	8.22	-6.75	1.48	-91.31	8.59	-57.26	1.8	-3.32
	49	50	GLU	282	6.27	1.64	10.55	1.38	16.82	2.33	-0.92	0.92	-0.46	0.77	-1.37	1.3	17.67	16.89	-0.31	1.81	17.36	17.33	23.02	17.21	9.78	2.24	32.8	17.78	-80.4	16.77	-10.9	1.75	-91.31	17.09	0.74	0.21	0.16	0.06	0.9	0.24	-79.66	16.59	-10.74	1.73	-90.41	16.9	-56.64	1.72	-0.96
	50	51	PHE	283	8	1.94	11.44	1.32	19.45	2.48	-4.4	0.75	-1.55	0.69	-5.94	1.15	1.57	0.36	-2.52	1.6	-0.95	1.76	5.18	2.31	7.38	2.21	12.56	3.28	-0.93	0.3	-4.91	1.1	-5.84	1.21	0.15	0.05	0.06	0.03	0.21	0.06	-0.77	0.31	-4.85	1.11	-5.62	1.24	4.41	2.26	2.53
	51	52	LEU	284	9.35	2.06	11.52	1.45	20.86	2.81	-1.61	0.79	-1.09	0.8	-2.7	1.14	-26.83	0.64	-0.71	1.03	-27.54	1.15	-19.1	2.25	9.72	1.62	-9.38	2.74	2.8	0.57	-2.77	0.71	0.04	0.75	0.33	0.07	0.02	0.01	0.34	0.07	3.13	0.56	-2.75	0.7	0.38	0.76	-15.97	2.24	6.97
	52	53	LYS	285	11.5	2.11	11.37	1.76	22.87	3.05	-0.9	1.08	-0.41	0.75	-1.31	1.39	-44.61	12.26	-13.42	1.58	-58.04	12.12	-34.01	12.31	-2.46	1.83	-36.47	12.06	16.32	10.98	-0.56	0.99	15.76	10.75	0.89	0.12	0.05	0.02	0.94	0.12	17.21	10.92	-0.51	0.98	16.7	10.69	-16.81	2.72	-2.96
	53	54	GLU	286	5.92	1.68	10.82	1.21	16.73	2.32	-2.4	0.99	-0.84	0.84	-3.23	1.28	12.06	5.94	-13.07	1.36	-1.01	6.31	15.58	6.5	-3.09	1.77	12.49	7.05	-71.81	5.95	-4.54	0.94	-76.34	6.27	0.27	0.06	0.04	0.02	0.3	0.06	-71.54	5.92	-4.5	0.94	-76.04	6.24	-55.96	1.86	-7.59
	54	55	ALA	287	2.87	0.89	10.91	1.5	13.77	1.86	-1.74	0.28	-2.07	0.82	-3.81	0.91	2.24	0.16	-8.99	1.61	-6.76	1.64	3.36	0.97	-0.16	2.24	3.2	2.55	-0.31	0.1	0.51	1.06	0.2	1.09	0.04	0.02	0	0	0.04	0.02	-0.27	0.11	0.51	1.06	0.24	1.08	3.09	0.94	0.35
	55	56	ALA	288	2.8	0.8	10.94	1.5	13.74	1.74	-0.72	0.26	-1.71	0.67	-2.42	0.76	2.1	0.12	-4.16	1.49	-2.06	1.52	4.18	0.83	5.08	1.58	9.26	1.86	-0.11	0.07	-2.59	1.27	-2.7	1.28	0.39	0.04	0.07	0.04	0.46	0.05	0.28	0.09	-2.52	1.25	-2.24	1.27	4.46	0.82	2.56
	56	57	VAL	289	6.19	1.67	11.43	1.52	17.63	2.39	-0.98	0.64	-0.33	1.02	-1.31	1.27	-19.39	0.69	-9.33	1.27	-28.73	1.2	-14.18	1.91	1.77	1.55	-12.41	2.38	4.34	0.64	-4.74	0.72	-0.4	0.64	0.35	0.06	0.02	0.01	0.37	0.06	4.69	0.63	-4.72	0.72	-0.03	0.63	-9.49	1.74	-2.95
	57	58	MET	290	7.95	1.98	10.77	1.34	18.72	2.41	-5.33	0.66	-1.87	0.78	-7.19	1.11	-1.05	1.07	-2.24	1.16	-3.29	1.63	1.57	2.28	6.66	1.76	8.24	3.17	0.9	0.94	-3.66	0.74	-2.76	1.24	0.15	0.04	0.01	0.01	0.17	0.04	1.05	0.94	-3.64	0.74	-2.59	1.24	2.62	2.15	3.02
	58	59	LYS	291	10.77	2.25	10.54	1.36	21.31	2.86	-3.1	0.74	-0.56	0.81	-3.66	1.23	-11.99	5.77	-9.6	1.2	-21.59	5.66	-4.32	5.96	0.38	1.57	-3.94	6.11	-13.18	5.69	-3.33	0.78	-16.51	5.55	0.55	0.06	0.2	0.05	0.75	0.08	-12.62	5.67	-3.13	0.77	-15.75	5.52	-16.95	2.19	-2.75
	59	60	GLU	292	6.37	1.53	10.7	1.4	17.07	2.33	-1.14	0.76	-0.42	0.97	-1.56	1.29	1.77	8.14	-12.11	2.14	-10.34	9.11	7	7.92	-1.83	2.55	5.17	9.1	-65.73	7.6	-3.73	1.72	-69.46	8.46	0.73	0.08	0.1	0.04	0.83	0.11	-65	7.54	-3.64	1.69	-68.64	8.38	-58	1.54	-5.47
	60	61	ILE	293	9.26	2.02	10.71	1.3	19.96	2.39	-1.94	1.03	-0.21	0.76	-2.15	1.4	-5.56	0.47	5.37	0.95	-0.2	0.94	1.75	2.28	15.86	1.46	17.61	2.39	3.46	0.4	-8.45	0.64	-4.99	0.59	0.06	0.04	0.01	0.01	0.07	0.04	3.52	0.4	-8.44	0.64	-4.92	0.58	5.28	2.2	7.42
	61	62	LYS	294	10.74	2.53	10.38	1.32	21.13	3.13	-1.34	0.8	-1.2	0.6	-2.54	1.06	-8.99	7.43	-0.92	0.75	-9.91	7.42	0.41	7.91	8.26	1.63	8.67	8.28	-16.7	7.38	-4.02	0.55	-20.73	7.27	0.77	0.1	0.07	0.02	0.84	0.1	-15.94	7.37	-3.95	0.54	-19.89	7.26	-15.52	2.96	4.31
	62	63	HIS	295	24.62	1.76	11.08	1.25	35.7	2.29	-6.64	0.77	-0.52	0.71	-7.16	1.1	-13.23	1.4	-0.16	0.94	-13.39	1.86	4.75	2.21	10.39	1.31	15.14	2.78	-1.7	1.2	-4.6	0.7	-6.3	1.49	0.2	0.03	0.02	0.01	0.23	0.03	-1.5	1.19	-4.57	0.7	-6.08	1.48	3.25	1.86	5.82
	63	64	PRO	296	12.15	1.59	13.98	1.41	26.13	2.54	-1.01	0.45	-1.23	0.61	-2.23	0.75	-6.02	0.88	-3.94	1.46	-9.96	1.19	5.12	1.78	8.81	1.72	13.94	2.74	5.38	0.84	-7.35	1.08	-1.97	0.78	0.68	0.03	0.08	0.03	0.77	0.03	6.07	0.84	-7.27	1.07	-1.2	0.77	11.19	1.64	1.54
	64	65	ASN	297	11.78	1.74	10.55	1.71	22.33	2.76	-4.03	0.68	-1.67	0.82	-5.7	1.15	-81.87	2.15	-7.34	1.03	-89.21	2.51	-74.11	2.36	1.54	1.48	-72.58	2.91	-3.73	1.37	-1.32	0.34	-5.06	1.38	0.16	0.03	0	0	0.16	0.03	-3.57	1.35	-1.32	0.34	-4.9	1.37	-77.69	1.65	0.21
	65	66	LEU	298	9.01	2.05	10.72	1.3	19.73	2.66	-2.75	0.93	-2.38	0.75	-5.13	1.2	-27.37	0.42	-1.56	0.97	-28.93	0.98	-21.11	2.13	6.78	1.54	-14.33	2.7	3.41	0.29	-4.26	0.56	-0.86	0.53	0.17	0.04	0	0	0.17	0.04	3.58	0.28	-4.26	0.56	-0.68	0.53	-17.52	2.13	2.52
	66	67	VAL	299	6.69	1.85	10.63	1.31	17.32	2.34	-2.68	0.79	-1.04	0.83	-3.71	1.28	-20.91	0.5	-7.36	1.19	-28.27	1.18	-16.9	1.93	2.24	1.58	-14.67	2.44	5.74	0.37	-8.73	0.75	-3	0.6	0.02	0.01	0.02	0.01	0.04	0.02	5.76	0.36	-8.71	0.75	-2.95	0.59	-11.15	1.84	-6.48
	67	68	GLN	300	14.1	2.06	10.96	1.27	25.06	2.32	-2.92	0.91	-2.4	0.67	-5.32	1.15	-73.89	5.58	-3.93	1.15	-77.81	5.81	-62.7	5.2	4.63	1.36	-58.07	5.17	-0.53	4.31	-4.55	0.58	-5.08	4.41	0.33	0.05	0.01	0.01	0.34	0.06	-0.2	4.29	-4.54	0.58	-4.74	4.39	-62.91	2	0.09
	68	69	LEU	301	9.07	1.93	10.75	1.38	19.82	2.47	-4.21	0.93	-2.29	0.66	-6.51	1.1	-25.81	0.49	-1.22	1.51	-27.03	1.4	-20.96	2.14	7.23	2.15	-13.72	2.95	1.91	0.43	-3.31	1.13	-1.4	0.92	0	0	0.02	0.02	0.03	0.02	1.92	0.43	-3.29	1.12	-1.37	0.92	-19.04	2.12	3.94
	69	70	LEU	302	8.17	1.92	10.59	1.24	18.76	2.36	-3.19	0.83	-1.62	0.68	-4.81	1.11	-25.65	0.41	-4.03	1	-29.68	1.01	-20.67	2.05	4.94	1.29	-15.73	2.33	2.19	0.28	-4.6	0.77	-2.41	0.67	0.21	0.04	0.07	0.02	0.28	0.05	2.41	0.27	-4.53	0.77	-2.12	0.66	-18.26	2.04	0.41
	70	71	GLY	303	0	0	8.05	1.33	8.05	1.33	0	0	-3.68	0.83	-3.68	0.83	0	0	-11.19	0.98	-11.19	0.98	0	0	-6.82	1.39	-6.82	1.39	0	0	-0.99	0.41	-0.99	0.41	0	0	0	0	0	0	0	0	-0.99	0.41	-0.99	0.41	0	0	-7.81
	71	72	VAL	304	5.96	1.67	9.62	1.37	15.58	2.39	-2.35	0.7	-1.76	0.76	-4.11	1.2	-18.83	0.44	-10.02	1.2	-28.86	1.32	-15.22	1.81	-2.17	1.62	-17.39	2.57	3.36	0.38	-4.58	0.58	-1.22	0.59	0.12	0.03	0	0	0.12	0.03	3.47	0.38	-4.58	0.58	-1.11	0.58	-11.75	1.73	-6.75
	72	73	CYS	305	3.26	1.1	10.26	1.04	13.52	1.66	-3.52	0.59	-2.4	0.7	-5.92	1.01	5.87	0.83	-7.42	1.21	-1.55	1.5	5.61	1.33	0.44	1.56	6.05	2.2	-1.02	0.5	-1.42	0.62	-2.44	0.84	0.01	0.01	0	0	0.01	0.01	-1.01	0.5	-1.42	0.62	-2.43	0.84	4.6	1.21	-0.98
	73	74	THR	306	6.33	1.53	10.51	1.34	16.83	2.17	-1.47	0.64	-0.29	0.64	-1.76	1.1	-23.56	1.36	1.12	1.08	-22.44	1.88	-18.7	2.01	11.34	1.55	-7.36	2.79	-0.91	0.84	-7.95	0.76	-8.86	1.27	0.26	0.06	0.08	0.02	0.34	0.07	-0.65	0.84	-7.86	0.76	-8.52	1.25	-19.35	1.75	3.47
	74	75	ARG	307	13.16	2.78	10.44	1.39	23.6	3.12	-0.5	1.01	0.4	0.58	-0.09	1.12	-209.96	9.68	-4.29	1.07	-214.26	9.49	-197.3	9.99	6.55	1.51	-190.75	9.88	20.31	7.94	-7.72	0.73	12.59	7.73	1.07	0.16	0.25	0.03	1.33	0.16	21.39	7.85	-7.47	0.72	13.92	7.65	-175.91	3.26	-0.93
	75	76	GLU	308	6	1.62	10.88	1.35	16.88	2.34	-0.85	1.01	0.32	0.75	-0.53	1.26	-5.61	6.52	0.35	0.97	-5.26	6.7	-0.46	6.62	11.54	1.64	11.08	7.2	-58.53	6.46	-7.18	0.81	-65.71	6.55	0.48	0.09	0.03	0.01	0.51	0.09	-58.05	6.4	-7.15	0.81	-65.2	6.5	-58.5	1.65	4.39
	76	77	PRO	309	12.22	1.44	14.24	1.31	26.47	2.06	-2	0.47	-0.22	0.76	-2.23	0.89	-10.75	1.07	12.4	1.49	1.66	1.15	-0.53	1.8	26.42	1.98	25.9	2.57	10.25	1.04	-12.66	1.5	-2.4	1.07	0.39	0.05	0.05	0.02	0.44	0.05	10.64	1.02	-12.61	1.49	-1.97	1.06	10.11	1.53	13.82
	77	78	PRO	310	12.51	1.48	13.37	1.31	25.87	2.22	-2.91	0.55	-2.32	0.78	-5.23	0.89	-7.46	1.17	4.12	1.28	-3.34	0.83	2.13	1.92	15.17	1.69	17.3	2.43	6.76	1.11	-10.61	1.13	-3.85	0.67	0.23	0.04	0	0	0.23	0.04	6.99	1.11	-10.61	1.13	-3.61	0.66	9.12	1.58	4.57
	78	79	PHE	311	9.15	1.99	9.79	1.16	18.95	2.46	-2.71	0.61	-2.14	0.85	-4.85	1.1	0.55	0.47	-8.44	0.85	-7.89	0.94	7	2.21	-0.79	1.4	6.21	2.79	-0.67	0.33	-1.73	0.37	-2.4	0.46	0.25	0.04	0	0	0.25	0.04	-0.42	0.32	-1.73	0.37	-2.15	0.45	6.58	2.19	-2.52
	79	80	TYR	312	9.83	2.06	11.18	1.55	21.01	2.77	-4.94	0.78	-3.14	0.81	-8.07	1.12	-17.1	0.65	-6.88	1.04	-23.99	1.25	-12.21	2.42	1.16	1.49	-11.04	2.87	-2.98	0.49	-1.53	0.36	-4.51	0.62	0.12	0.03	0	0	0.12	0.03	-2.86	0.49	-1.53	0.36	-4.4	0.62	-15.07	2.27	-0.37
	80	81	ILE	313	9.71	2.08	11.35	1.4	21.06	2.65	-3.85	0.92	-1.96	0.89	-5.81	1.4	-5.45	0.4	-6.25	0.93	-11.7	0.91	0.42	1.97	3.13	1.63	3.55	2.4	3.56	0.36	-4	0.37	-0.44	0.26	0	0	0	0	0	0	3.56	0.36	-4	0.37	-0.44	0.26	3.98	1.98	-0.87
	81	82	ILE	314	10.68	2.2	10.48	1.29	21.16	2.66	-4.99	0.98	-1.69	0.98	-6.69	1.49	-4.97	0.29	-9.84	1.05	-14.81	1.04	0.72	2.34	-1.06	1.58	-0.34	2.99	2.98	0.25	-2.83	0.45	0.14	0.35	0	0	0	0	0	0	2.98	0.25	-2.83	0.45	0.14	0.35	3.7	2.32	-3.89
	82	83	ILE	315	9.72	2.49	10.13	1.2	19.85	2.74	-3.5	1.19	-1.31	1	-4.81	1.69	-6.05	0.33	-11.75	0.85	-17.8	0.82	0.17	2.58	-2.93	1.32	-2.76	2.83	3.91	0.32	-3.31	0.43	0.6	0.42	0.03	0.02	0	0	0.03	0.02	3.94	0.33	-3.31	0.43	0.63	0.42	4.11	2.6	-6.24
	83	84	GLU	316	6.21	1.96	9.99	1.11	16.2	2.41	-3.08	0.98	-2.26	0.74	-5.34	1.25	-13.05	5.63	0.19	0.83	-12.86	5.73	-9.92	5.77	7.92	1.26	-2	5.86	-48.27	4.65	-9.37	0.74	-57.65	4.79	0.16	0.02	0.01	0	0.17	0.02	-48.11	4.64	-9.37	0.74	-57.48	4.78	-58.03	2.12	-1.45
	84	85	PHE	317	8.23	1.97	9.83	1.15	18.06	2.37	-2.82	0.59	-1.94	0.63	-4.76	0.87	0.6	0.43	-1.22	0.98	-0.62	1.01	6.01	2.12	6.68	1.43	12.69	2.73	-0.87	0.26	-5.95	0.76	-6.82	0.78	0.3	0.05	0.13	0.02	0.43	0.05	-0.57	0.25	-5.83	0.75	-6.4	0.78	5.44	2.16	0.85
	85	86	MET	318	7.04	1.57	11.23	1.23	18.27	2.04	-6.11	0.86	-2.3	0.66	-8.41	1.18	-2.36	0.63	-3.26	0.72	-5.62	1	-1.43	1.91	5.67	1.41	4.24	2.31	2.44	0.52	-5.07	0.55	-2.63	0.71	0.03	0.02	0.02	0.01	0.05	0.02	2.47	0.51	-5.05	0.54	-2.58	0.7	1.04	1.81	0.62
	86	87	THR	319	6.59	1.43	12.85	1.77	19.43	2.4	-0.81	0.83	-0.89	0.66	-1.7	1.16	-32.36	1.71	-8.12	0.89	-40.48	1.95	-26.58	2.08	3.83	1.49	-22.75	2.66	4.8	0.73	-8.24	0.64	-3.43	0.93	0.28	0.03	0.17	0.02	0.46	0.04	5.09	0.73	-8.06	0.63	-2.98	0.93	-21.5	1.75	-4.23
	87	88	TYR	320	9.26	2.18	9.43	1.54	18.69	2.8	-0.77	0.84	-0.64	0.77	-1.41	1.19	-17.5	0.89	-3.09	0.91	-20.59	1.31	-9.01	2.58	5.7	1.59	-3.31	3.28	-4.43	0.71	-6.73	0.55	-11.16	0.94	0.75	0.06	0.11	0.03	0.86	0.05	-3.68	0.7	-6.62	0.55	-10.3	0.93	-12.69	2.47	-0.92
	88	89	GLY	321	0	0	8.03	1.27	8.03	1.27	0	0	-2.63	0.67	-2.63	0.67	0	0	-9.05	0.96	-9.05	0.96	0	0	-3.65	1.38	-3.65	1.38	0	0	-2.62	0.69	-2.62	0.69	0	0	0.01	0.01	0.01	0.01	0	0	-2.61	0.68	-2.61	0.68	0	0	-6.25
	89	90	ASN	322	12.23	1.92	10.4	1.4	22.63	2.58	-3.67	1.12	-2.86	0.8	-6.53	1.4	-85.82	3.03	-4.45	0.99	-90.26	3.31	-77.26	2.79	3.09	1.57	-74.17	3.59	-1.69	1.42	-3.61	0.64	-5.3	1.82	0.05	0.03	0	0	0.05	0.03	-1.64	1.41	-3.61	0.64	-5.25	1.81	-78.9	2.07	-0.52
	90	91	LEU	323	8.77	1.85	11.66	1.29	20.43	2.32	-4.63	0.95	-2.56	0.91	-7.19	1.45	-28.49	0.33	-0.78	0.84	-29.27	0.93	-24.35	2.05	8.33	1.47	-16.02	2.71	4.7	0.24	-7.32	0.49	-2.62	0.45	0	0	0	0	0	0	4.7	0.24	-7.32	0.49	-2.62	0.45	-19.65	2.07	1.01
	91	92	LEU	324	8.39	1.94	11.77	1.38	20.16	2.49	-2.97	0.89	-2.64	0.79	-5.61	1.27	-28.25	0.51	-5.57	0.97	-33.82	1.18	-22.84	2.23	3.56	1.5	-19.28	2.9	4.25	0.38	-6.66	0.63	-2.42	0.78	0.16	0.04	0	0	0.16	0.04	4.4	0.38	-6.66	0.63	-2.26	0.79	-18.44	2.17	-3.1
	92	93	ASP	325	4.37	1.38	10.78	1.19	15.15	1.94	-1.87	0.75	-2.16	0.6	-4.03	0.99	30.05	7.54	2.87	1.69	32.92	7.9	32.54	7.5	11.49	1.76	44.03	7.84	-93.3	7.69	-16.45	1.47	-109.75	8.42	0.41	0.05	0.03	0.02	0.44	0.05	-92.89	7.68	-16.42	1.46	-109.31	8.41	-60.34	1.23	-4.93
	93	94	TYR	326	8.59	2.23	10.91	1.26	19.5	2.51	-3.2	0.75	-2.39	0.79	-5.59	1.07	-20.43	0.9	-3.76	1.46	-24.19	1.81	-15.05	2.29	4.77	1.96	-10.28	2.66	-1.78	0.52	-5.18	0.78	-6.96	1.05	0.18	0.04	0.02	0.01	0.2	0.05	-1.61	0.5	-5.16	0.78	-6.76	1.03	-16.65	2.35	-0.39
	94	95	LEU	327	8.73	2.02	11.57	1.56	20.3	2.43	-4.77	0.89	-2.25	0.86	-7.02	1.33	-28.67	0.36	6.38	1.29	-22.29	1.2	-24.71	2.16	15.7	1.91	-9.01	2.98	5.27	0.27	-8.19	1.07	-2.92	0.95	0	0	0	0	0	0	5.27	0.27	-8.19	1.07	-2.92	0.95	-19.44	2.15	7.51
	95	96	ARG	328	12.5	2.87	10.79	1.58	23.3	3.31	-3.84	0.88	-0.86	0.65	-4.71	1.16	-228.67	5.74	-8.72	1.25	-237.39	5.38	-220.01	6.44	1.21	1.7	-218.8	6.19	42.7	5.3	-6.12	0.98	36.58	4.99	0.78	0.06	0.22	0.04	1.01	0.07	43.49	5.28	-5.9	0.97	37.59	4.98	-176.52	2.7	-4.7
	96	97	GLU	329	6.62	1.82	10.64	1.5	17.26	2.51	-0.97	0.56	0.14	0.71	-0.83	0.97	59.47	4.28	-3.43	1.62	56.04	5.42	65.12	4.75	7.35	1.85	72.47	5.9	-122.15	4.35	-14.78	1.29	-136.93	5.36	0.9	0.06	0.15	0.04	1.05	0.06	-121.25	4.36	-14.63	1.3	-135.88	5.37	-56.13	1.59	-7.28
	97	98	CYS	330	3.44	0.95	10.09	1.3	13.54	1.77	-2.91	0.5	-0.97	0.79	-3.89	0.98	5.84	1.27	-6.74	2.13	-0.9	2.49	6.37	1.54	2.38	2.46	8.75	2.94	-1.8	0.76	-1.45	1.62	-3.25	1.83	0.04	0.02	0.1	0.03	0.13	0.04	-1.77	0.75	-1.35	1.6	-3.11	1.8	4.61	1.18	1.03
	98	99	ASN	331	11.15	2	10.54	1.08	21.69	2.44	-1.67	0.63	-0.91	0.84	-2.58	1.17	-84.98	3.44	0.28	1.76	-84.7	4.6	-75.49	3.97	9.9	1.64	-65.59	4.79	-2.77	2.59	-3.49	0.85	-6.27	3.11	0.5	0.06	0.08	0.03	0.58	0.06	-2.27	2.56	-3.42	0.86	-5.69	3.08	-77.76	2.03	6.48
	99	100	ARG	332	13.41	2.86	11.25	1.55	24.66	3.43	-2.88	0.96	-0.96	0.65	-3.84	1.18	-226.71	5.82	-1.17	1.39	-227.88	5.69	-216.18	6.95	9.11	1.76	-207.07	7.04	42.47	5.9	-8.24	1.04	34.23	5.77	0.87	0.13	0.14	0.03	1.01	0.14	43.35	5.83	-8.1	1.04	35.24	5.68	-172.84	2.88	1.01
	100	101	GLN	333	14.49	2.54	10	1.31	24.5	2.91	-0.43	0.74	0.88	0.85	0.45	1.3	-64.25	1.78	-11.21	1.03	-75.46	2.16	-50.19	2.55	-0.33	1.55	-50.51	3.12	-10.5	1.53	-6.44	0.8	-16.94	1.93	1.01	0.07	0.24	0.05	1.25	0.06	-9.49	1.5	-6.2	0.79	-15.69	1.9	-59.67	2.12	-6.53
	101	102	GLU	334	5.93	2	10.6	1.41	16.53	2.57	-0.87	0.6	0.34	0.84	-0.53	1.12	44.85	5.6	1.95	1.01	46.8	5.97	49.91	5.86	12.89	1.44	62.8	6.46	-108.24	5.37	-12.36	0.74	-120.59	5.6	0.81	0.05	0.24	0.03	1.06	0.05	-107.42	5.36	-12.12	0.73	-119.54	5.59	-57.52	1.92	0.77
	102	103	VAL	335	6.14	1.49	10.33	1.29	16.46	2.04	-2.21	0.78	0.2	0.85	-2.01	1.27	-22.58	0.56	-0.36	1.42	-22.94	1.42	-18.66	1.73	10.17	1.69	-8.48	2.34	7.29	0.48	-12.55	1.31	-5.27	1.16	0.07	0.04	0.05	0.04	0.12	0.07	7.36	0.48	-12.51	1.29	-5.15	1.12	-11.3	1.65	-2.33
	103	104	ASN	336	11.51	1.63	10.3	1.23	21.81	2.15	-1.1	0.68	-0.51	0.81	-1.61	1.17	-79.16	1.57	-8.19	1.35	-87.36	2.2	-68.76	1.82	1.59	1.42	-67.16	2.58	-7.81	1.33	-2.68	0.73	-10.49	1.4	0.67	0.06	0.05	0.03	0.72	0.07	-7.14	1.29	-2.63	0.73	-9.77	1.36	-75.9	1.45	-1.04
	104	105	ALA	337	2.8	0.76	11.25	1.47	14.05	1.71	-0.96	0.26	-1.19	0.99	-2.15	0.96	2.2	0.14	-5.07	1.15	-2.87	1.19	4.04	0.86	4.99	1.55	9.03	1.85	-0.21	0.06	-2.15	0.53	-2.35	0.55	0.21	0.08	0.04	0.02	0.25	0.09	0	0.09	-2.11	0.52	-2.1	0.55	4.04	0.88	2.88
	105	106	VAL	338	6.72	1.68	10.69	1.39	17.41	2.17	-0.28	0.7	-0.45	0.83	-0.73	1.24	-21.72	0.65	-3.79	1.13	-25.51	1.31	-15.28	1.9	6.45	1.74	-8.83	2.55	6.29	0.55	-9.5	0.84	-3.21	0.91	0.65	0.1	0.04	0.02	0.69	0.1	6.93	0.55	-9.46	0.82	-2.53	0.9	-8.35	1.82	-3.01
	106	107	VAL	339	6.12	1.54	10.72	1.29	16.84	2.01	-1.85	0.64	-0.32	1.05	-2.17	1.16	-21.43	0.55	-5.91	1.07	-27.34	1.09	-17.16	1.74	4.49	1.59	-12.67	2.39	6.51	0.41	-7.87	0.56	-1.37	0.51	0.19	0.05	0.01	0.01	0.2	0.05	6.69	0.41	-7.86	0.56	-1.17	0.49	-10.46	1.71	-3.37
	107	108	LEU	340	9.21	2.17	11.17	1.36	20.39	2.61	-3.24	0.85	-2.29	0.76	-5.53	1.24	-27.8	0.49	-1.56	0.93	-29.37	0.98	-21.83	2.3	7.32	1.5	-14.51	2.91	4.56	0.37	-5.85	0.41	-1.3	0.55	0.09	0.03	0.01	0.01	0.09	0.04	4.64	0.37	-5.85	0.4	-1.2	0.54	-17.19	2.31	1.48
	108	109	LEU	341	9	1.98	11.6	1.47	20.6	2.83	-2.04	1.04	-0.93	0.99	-2.96	1.55	-28.22	0.54	-7.14	1.49	-35.35	1.62	-21.25	2.2	3.54	1.67	-17.71	3.05	4.73	0.34	-5.96	0.44	-1.23	0.52	0.2	0.07	0.01	0.01	0.2	0.07	4.92	0.33	-5.95	0.44	-1.03	0.52	-16.32	2.22	-2.41
	109	110	TYR	342	8.47	2.11	10.98	1.31	19.44	2.77	-1.71	0.62	-2.34	0.76	-4.05	1.03	-19.43	0.61	-10.33	0.9	-29.76	1.12	-12.67	2.27	-1.7	1.63	-14.37	3.06	-2.74	0.48	-2.21	0.38	-4.95	0.63	0.74	0.06	0.02	0.01	0.76	0.06	-2	0.44	-2.19	0.38	-4.2	0.61	-14.68	2.26	-3.89
	110	111	MET	343	6.99	1.73	11.39	1.17	18.38	2.22	-6.35	0.63	-3.16	0.66	-9.51	0.9	-2.77	0.45	-7.61	1.03	-10.38	1.13	-2.13	2.05	0.61	1.56	-1.51	2.66	2.77	0.31	-3.62	0.52	-0.85	0.57	0	0	0	0	0	0	2.77	0.31	-3.62	0.52	-0.85	0.57	0.64	1.96	-3.01
	111	112	ALA	344	2.85	0.84	11.32	1.31	14.17	1.63	-1.93	0.4	-3.22	0.99	-5.15	1.11	2.15	0.14	-11.83	1.78	-9.67	1.84	3.07	0.9	-3.72	1.88	-0.65	2.18	-0.23	0.06	-0.04	0.45	-0.27	0.47	0	0	0	0	0	0.01	-0.23	0.06	-0.04	0.45	-0.27	0.48	2.84	0.91	-3.76
	112	113	THR	345	6.29	1.42	11.65	1.46	17.94	2.17	-1.94	0.81	-1.86	1.02	-3.81	1.3	-24.33	1.01	-11.09	2.05	-35.42	2.21	-19.99	1.41	-1.31	2.21	-21.3	2.73	0.92	0.46	-3.9	0.76	-2.99	0.88	0.25	0.07	0	0	0.25	0.07	1.17	0.44	-3.9	0.76	-2.73	0.86	-18.82	1.43	-5.21
	113	114	GLN	346	13.41	1.59	10.91	1.32	24.32	2.14	-5.57	0.88	-2.78	0.78	-8.34	1.2	-74.38	1.61	-4.91	1.71	-79.29	2.19	-66.53	1.92	3.22	1.82	-63.31	2.75	1.12	0.73	-3.04	0.57	-1.92	0.86	0.05	0.02	0.01	0.01	0.06	0.02	1.18	0.72	-3.03	0.57	-1.86	0.86	-65.36	1.67	0.18
	114	115	ILE	347	9.64	2.16	11.22	1.25	20.86	2.57	-3.14	1.14	-1.35	0.95	-4.49	1.56	-6.95	0.33	-5.27	1.15	-12.22	1.19	-0.44	2.39	4.6	1.81	4.15	3.24	5.41	0.27	-6.11	0.49	-0.7	0.5	0	0	0	0	0	0	5.41	0.27	-6.11	0.49	-0.7	0.5	4.97	2.39	-1.51
	115	116	SER	348	3.53	0.85	11.38	1.29	14.91	1.69	-2.86	0.79	-2.8	0.87	-5.66	1.25	-5.37	1.06	-8.66	1.25	-14.02	1.76	-4.69	1.28	-0.08	1.62	-4.78	2.04	2.04	0.52	-5.45	0.59	-3.4	0.74	0	0	0	0	0	0	2.04	0.52	-5.45	0.59	-3.4	0.74	-2.65	1.38	-5.53
	116	117	SER	349	3.39	0.97	11.22	1.19	14.61	1.7	-1.93	0.69	-2.96	0.62	-4.9	0.96	-4.95	2.14	-7.81	1.4	-12.76	2.11	-3.49	2.02	0.45	1.71	-3.05	2.46	1.24	1.73	-4.92	0.91	-3.67	1.8	0.13	0.03	0.01	0.01	0.14	0.04	1.37	1.72	-4.91	0.91	-3.54	1.78	-2.12	1.18	-4.46
	117	118	ALA	350	2.77	0.75	11	1.33	13.77	1.66	-2.28	0.29	-3.31	0.73	-5.59	0.81	2.3	0.15	-8.28	0.78	-5.98	0.82	2.78	0.84	-0.59	1.45	2.19	1.78	-0.24	0.07	0.24	0.52	0	0.55	0	0	0.01	0.01	0.01	0.01	-0.24	0.07	0.25	0.52	0.01	0.55	2.55	0.84	-0.34
	118	119	MET	351	7.07	1.65	10.89	1.45	17.96	2.29	-6.44	0.69	-2.78	0.77	-9.22	1.18	-4.08	0.38	-9.23	1.05	-13.31	1.12	-3.45	1.87	-1.12	1.58	-4.57	2.65	3.69	0.25	-3.68	0.55	0.02	0.54	0.01	0.01	0	0	0.01	0.01	3.7	0.25	-3.67	0.55	0.03	0.54	0.26	1.83	-4.8
	119	120	GLU	352	8.15	2.03	10.87	1.44	19.02	2.79	-3.44	1.02	-2.47	0.87	-5.92	1.33	18.9	7.92	-4.41	1.6	14.5	7.93	23.61	7.58	3.99	1.75	27.6	7.85	-78.85	7.31	-7.9	1.22	-86.75	7.13	0.17	0.05	0	0	0.17	0.05	-78.68	7.28	-7.9	1.22	-86.58	7.11	-55.08	1.82	-3.91
	120	121	TYR	353	8.66	1.85	10.69	1.32	19.35	2.4	-2.62	0.8	-2.74	0.71	-5.36	1.19	-17.07	1.05	-6.95	0.99	-24.02	1.65	-11.02	2.26	1	1.78	-10.02	3.1	-3.92	0.85	-0.88	0.58	-4.81	1.2	0.47	0.07	0	0	0.47	0.07	-3.45	0.81	-0.88	0.58	-4.33	1.16	-14.47	2.04	0.12
	121	122	LEU	354	9.25	2.15	11.82	1.63	21.07	2.81	-3.17	0.92	-2.56	0.83	-5.73	1.24	-28.11	0.45	-8.96	1.06	-37.08	1.07	-22.04	2.43	0.29	1.65	-21.74	3.18	4.32	0.3	-2.89	0.59	1.44	0.53	0.07	0.03	0	0	0.07	0.03	4.39	0.3	-2.89	0.59	1.5	0.52	-17.64	2.38	-2.6
	122	123	GLU	355	5.86	1.54	11.54	1.41	17.4	2.12	-4.14	1.04	-1.63	0.79	-5.77	1.39	26.87	5.09	-0.95	1.28	25.92	5.51	28.58	5.19	8.97	1.64	37.55	5.75	-82.88	4.81	-7.21	0.8	-90.09	5.1	0.16	0.03	0.05	0.01	0.21	0.03	-82.72	4.81	-7.16	0.79	-89.88	5.1	-54.14	1.98	1.81
	123	124	LYS	356	12.22	2.66	11.69	1.51	23.91	3.39	-1.13	1.04	-0.68	0.65	-1.81	1.27	-64.5	8.55	0.76	1.17	-63.74	8.78	-53.41	8.07	11.77	1.74	-41.64	8.53	34.96	7.18	-4.04	0.69	30.93	7.37	0.85	0.06	0.26	0.02	1.11	0.06	35.82	7.17	-3.78	0.69	32.04	7.36	-17.59	2.8	7.99
	124	125	LYS	357	11.54	2.47	10.47	1.51	22.01	2.99	-2.86	0.99	-0.12	0.61	-2.98	1.17	-42.94	12.07	-9.15	1.17	-52.09	11.7	-34.26	12.33	1.2	1.47	-33.06	11.98	14.12	10.63	-3.54	1.07	10.57	10.34	0.5	0.12	0.16	0.03	0.66	0.11	14.61	10.54	-3.38	1.05	11.23	10.25	-19.65	3.02	-2.18
	125	126	ASN	358	11.11	1.89	10.99	1.58	22.11	2.41	-0.69	0.51	-0.07	0.76	-0.77	0.98	-75.91	1.55	-14.43	1.85	-90.34	2.12	-65.49	2.04	-3.51	2.42	-69	2.95	-10.89	1.13	-1.48	1.31	-12.36	1.63	0.74	0.05	0.12	0.02	0.86	0.06	-10.15	1.11	-1.36	1.31	-11.5	1.6	-75.64	1.65	-4.86
	126	127	PHE	359	8.28	2.07	10.02	1.2	18.3	2.52	-1.06	0.68	-1.37	0.82	-2.43	1.13	0.45	0.55	-2.36	0.91	-1.91	1.09	7.67	2.27	6.29	1.44	13.96	2.86	-0.64	0.49	-5.65	0.59	-6.29	0.88	0.57	0.08	0.03	0.01	0.6	0.08	-0.08	0.45	-5.62	0.59	-5.7	0.85	7.59	2.24	0.67
	127	128	ILE	360	10.11	2.21	10.93	1.52	21.04	2.77	-1.64	1.01	-0.49	0.73	-2.12	1.39	-6.66	0.55	-1.09	1.17	-7.74	1.07	1.81	2.22	9.35	1.82	11.17	2.97	4.24	0.49	-7.89	1.01	-3.65	0.82	0.4	0.06	0.05	0.02	0.45	0.06	4.64	0.49	-7.84	1	-3.2	0.8	6.46	2.16	1.51
	128	129	HIS	361	25.18	1.63	11.75	1.28	36.92	2.18	-6.72	0.72	-1.02	0.93	-7.74	1.21	-11.38	1.43	-0.79	2.09	-12.17	2.78	7.07	2.1	9.94	2.24	17.01	3.06	-1.33	0.95	-5.37	1.74	-6.7	2.27	0.07	0.03	0.09	0.03	0.16	0.05	-1.26	0.96	-5.28	1.74	-6.54	2.29	5.81	1.92	4.66
	129	130	ARG	362	13.27	2.44	12.87	1.73	26.14	3.24	-4.98	1.21	-1.53	0.73	-6.51	1.36	-203.39	10.89	-13.06	1.3	-216.44	10.23	-195.09	10.58	-1.72	1.8	-196.81	10.29	20.77	10.05	-0.85	0.93	19.92	9.36	0.25	0.1	0.07	0.02	0.33	0.09	21.02	10.11	-0.78	0.94	20.25	9.41	-174.07	2.51	-2.49
	130	131	ASP	363	4.87	1.47	10.03	1.45	14.9	1.93	-1.9	1.12	-0.62	0.92	-2.52	1.5	9.57	8.51	-6.62	1.55	2.95	9.32	12.54	8.41	2.79	1.8	15.33	8.98	-69.47	8.28	-10.02	0.77	-79.49	8.68	0.09	0.04	0.02	0.01	0.11	0.04	-69.38	8.26	-10.01	0.77	-79.38	8.66	-56.84	1.57	-7.21
	131	132	LEU	364	8.89	1.71	10.61	1.34	19.49	2.16	-4.28	0.81	-1.89	0.71	-6.17	1.08	-28.4	0.38	1.84	0.74	-26.56	0.81	-23.79	1.94	10.56	1.56	-13.23	2.57	4.59	0.32	-8.07	0.44	-3.48	0.4	0	0	0.01	0.01	0.01	0.01	4.59	0.32	-8.06	0.44	-3.46	0.4	-19.2	1.87	2.5
	132	133	ALA	365	2.33	0.82	9.6	1.22	11.93	1.66	-1.71	0.37	-3.01	0.74	-4.72	0.78	2.54	0.13	-9.2	1.13	-6.66	1.14	3.16	0.93	-2.61	1.4	0.55	1.96	-0.37	0.08	-0.04	0.38	-0.41	0.4	0.02	0.01	0	0	0.02	0.01	-0.35	0.08	-0.04	0.38	-0.39	0.4	2.81	0.94	-2.65
	133	134	ALA	366	2.83	1.02	10.97	1.21	13.8	1.68	-2.24	0.36	-3.21	0.79	-5.45	0.91	2.04	0.13	-0.68	1.22	1.35	1.23	2.63	1.11	7.08	1.54	9.71	2.13	-0.02	0.06	-0.37	0.35	-0.39	0.37	0	0	0	0	0	0	-0.02	0.06	-0.37	0.35	-0.39	0.37	2.62	1.11	6.7
	134	135	ARG	367	12.78	2.74	10.44	1.44	23.21	3.35	-4.72	0.91	-1.76	0.83	-6.48	1.33	-220.39	4.29	-5.21	1.38	-225.61	4.15	-212.34	4.83	3.47	1.63	-208.87	5.07	34.48	3.76	-3.64	0.78	30.84	3.61	0.21	0.04	0.01	0.01	0.21	0.04	34.68	3.76	-3.63	0.78	31.05	3.61	-177.66	2.65	-0.17
	135	136	ASN	368	11.84	1.91	10.07	1.22	21.91	2.39	-4.34	0.87	-1.87	0.74	-6.21	1.1	-85.73	2.74	-12.95	0.86	-98.68	2.84	-78.24	3.15	-4.74	1.41	-82.98	3.56	-0.86	1.26	-1.64	0.57	-2.5	1.37	0	0	0	0	0	0	-0.86	1.26	-1.64	0.57	-2.5	1.37	-79.09	2.34	-6.39
	136	137	CYS	369	3.07	0.97	9.38	1.22	12.45	1.8	-4.22	0.4	-2.33	0.78	-6.56	0.9	5.95	0.5	-6.84	0.9	-0.89	1.03	4.8	1.07	0.2	1.34	5	1.98	-1.64	0.21	0.04	0.35	-1.6	0.37	0	0	0	0	0	0	-1.64	0.21	0.04	0.35	-1.6	0.37	3.16	1.02	0.24
	137	138	LEU	370	8.63	1.97	10.02	1.37	18.65	2.61	-3.58	0.9	-2.4	0.8	-5.98	1.18	-27.39	0.42	-3.49	0.98	-30.88	1.01	-22.34	2.26	4.13	1.45	-18.2	2.77	4.07	0.27	-4.28	0.44	-0.2	0.37	0.01	0.01	0	0	0.01	0.01	4.08	0.27	-4.28	0.44	-0.19	0.37	-18.25	2.27	-0.14
	138	139	VAL	371	6.05	1.64	9.23	1.24	15.28	2.28	-3.64	0.8	-1.99	0.77	-5.63	1.18	-23.27	0.44	-8.54	1.01	-31.81	1.01	-20.85	1.82	-1.31	1.37	-22.16	2.2	7.65	0.34	-7.33	0.61	0.33	0.53	0	0	0	0	0	0	7.65	0.34	-7.33	0.61	0.33	0.53	-13.2	1.75	-8.63
	139	140	GLY	372	0	0	8.9	1.29	8.9	1.29	0	0	-3.25	0.89	-3.25	0.89	0	0	-9.46	1.38	-9.46	1.38	0	0	-3.81	1.89	-3.81	1.89	0	0	-4.44	1	-4.44	1	0	0	0.01	0.01	0.01	0.01	0	0	-4.43	1	-4.43	1	0	0	-8.25
	140	141	GLU	373	5.97	1.65	9.6	1.32	15.57	2.29	-0.73	0.81	-0.71	0.78	-1.44	1.21	30.7	2.98	2.34	1.11	33.04	3.18	35.94	3.14	11.23	1.82	47.17	3.7	-92.21	2.83	-10.98	0.79	-103.2	2.99	0.73	0.04	0.04	0.01	0.77	0.04	-91.49	2.83	-10.94	0.79	-102.43	2.99	-55.55	1.53	0.29
	141	142	ASN	374	10.9	1.62	11.06	1.45	21.96	2.28	-0.17	0.42	-0.3	0.74	-0.47	1.03	-75.47	1.26	-4.57	1.54	-80.05	2.16	-64.74	1.95	6.19	1.85	-58.55	2.9	-12.11	0.88	-3.95	1.17	-16.06	1.54	0.87	0.03	0.14	0.02	1.01	0.03	-11.24	0.87	-3.81	1.17	-15.05	1.53	-75.98	1.51	2.38
	142	143	HIS	375	24.66	1.69	11.14	1.61	35.8	2.34	-3.75	0.65	-1.92	0.66	-5.67	1.02	-12.82	1.16	-6.82	0.96	-19.64	1.45	8.09	2.01	2.39	1.59	10.48	2.66	-2.41	1.02	-3.58	0.44	-5.99	1.07	0.33	0.06	0.01	0.01	0.34	0.06	-2.08	0.97	-3.57	0.44	-5.66	1.02	6.01	1.76	-1.18
	143	144	LEU	376	9.25	2.09	10.43	1.2	19.68	2.58	-1.73	0.94	-1.24	0.9	-2.97	1.36	-28.11	0.4	-3.17	1.28	-31.28	1.33	-20.59	2.36	6.02	1.72	-14.57	3.03	4.16	0.29	-5.84	0.67	-1.68	0.66	0.42	0.04	0	0	0.42	0.04	4.58	0.28	-5.84	0.67	-1.26	0.67	-16.01	2.35	0.19
	144	145	VAL	377	5.83	1.67	9.82	1.07	15.65	2.2	-3.69	0.63	-1.88	0.76	-5.58	1.07	-22.26	0.47	-1.92	1.38	-24.18	1.37	-20.12	1.74	6.02	1.68	-14.1	2.57	6.92	0.35	-7.2	0.7	-0.28	0.53	0	0	0	0	0	0	6.92	0.35	-7.2	0.7	-0.28	0.53	-13.2	1.72	-1.18
	145	146	LYS	378	10.82	2.11	10.39	1.4	21.21	2.56	-5.25	0.91	-2.47	0.79	-7.72	1.32	-65.71	5.23	-7.44	0.82	-73.15	5.28	-60.13	5.56	0.48	1.45	-59.66	5.66	37.81	4.6	-2.04	0.32	35.77	4.59	0.17	0.03	0	0	0.17	0.03	37.98	4.6	-2.04	0.32	35.94	4.58	-22.16	2.39	-1.56
	146	147	VAL	379	6.36	1.76	9.77	1.24	16.13	2.25	-2.98	0.74	-0.97	0.89	-3.94	1.18	-21.47	0.42	-12.91	0.9	-34.38	0.95	-18.08	1.97	-4.11	1.56	-22.19	2.63	6.29	0.33	-6.26	0.5	0.03	0.41	0.02	0.01	0	0	0.02	0.01	6.31	0.32	-6.26	0.5	0.05	0.41	-11.77	1.9	-10.37
	147	148	ALA	380	2.54	0.95	9.96	1.48	12.5	1.96	-1.55	0.43	-2.16	0.73	-3.71	0.82	2.28	0.14	-5.47	1.11	-3.19	1.15	3.27	1.01	2.33	1.68	5.6	2.15	-0.33	0.07	-3.17	0.78	-3.5	0.8	0	0	0.04	0.02	0.04	0.02	-0.33	0.07	-3.13	0.78	-3.46	0.8	2.94	1.02	-0.8
	148	149	ASP	381	3.96	1.75	10.09	1.51	14.05	2.56	-2.27	0.76	-0.97	0.82	-3.24	1.29	21.08	7.77	-3.32	2.01	17.76	8.76	22.77	7.73	5.8	2.23	28.57	8.81	-82.24	7.54	-8.54	1.32	-90.78	8.21	0.35	0.08	0.04	0.02	0.4	0.07	-81.88	7.55	-8.5	1.32	-90.38	8.22	-59.11	1.71	-2.7
	149	150	PHE	382	7.93	1.8	9.63	1.47	17.55	2.38	-3.33	0.74	-1.08	0.69	-4.41	1.1	1.44	0.38	-5.93	1.75	-4.49	1.81	6.03	2.04	2.62	2.1	8.65	3.23	-0.17	0.29	-1.83	0.99	-2	1.02	0.01	0.01	0.04	0.03	0.05	0.03	-0.16	0.29	-1.79	1	-1.95	1.02	5.87	2.08	0.83
	150	151	GLY	383	0	0	9.34	1.29	9.34	1.29	0	0	-1.89	0.78	-1.89	0.78	0	0	-12.06	2	-12.06	2	0	0	-4.61	2.07	-4.61	2.07	0	0	1.91	1.07	1.91	1.07	0	0	0.11	0.03	0.11	0.03	0	0	2.02	1.07	2.02	1.07	0	0	-2.59
	151	152	LEU	384	8.85	1.81	11.05	1.27	19.9	2.21	-3.21	0.91	-1.34	0.73	-4.55	1.16	-26.79	0.51	-8.69	0.97	-35.48	1.16	-21.14	1.96	1.01	1.51	-20.13	2.31	3.3	0.37	-1.75	0.49	1.55	0.6	0.04	0.03	0	0.01	0.05	0.03	3.35	0.37	-1.75	0.49	1.6	0.59	-17.8	1.87	-0.74
	152	153	SER	385	3.89	1.22	10.85	1.42	14.74	2.06	-1.69	0.43	-1.34	0.71	-3.04	0.94	-3.71	1.07	-3.88	1.58	-7.6	2	-1.51	1.7	5.62	2.09	4.11	3	0.25	1.15	-2.6	1.36	-2.36	1.67	0.18	0.07	0.02	0.01	0.19	0.07	0.42	1.12	-2.59	1.35	-2.16	1.68	-1.09	1.6	3.03
	153	154	ARG	386	13	2.95	10.52	1.42	23.52	3.53	-1.42	1.45	0.04	0.76	-1.38	1.66	-223.61	8.39	-2.13	0.99	-225.74	8.33	-212.03	8.19	8.42	1.52	-203.6	8.48	34.03	7.41	-5.15	0.69	28.88	7.11	0.82	0.11	0.22	0.05	1.03	0.13	34.85	7.39	-4.93	0.66	29.92	7.1	-177.18	3.29	3.49
	154	155	LEU	387	8.45	1.79	11.73	1.33	20.17	2.37	-0.68	1.04	-0.34	0.77	-1.01	1.34	-25.92	0.58	-6.45	0.93	-32.37	1.07	-18.15	1.92	4.94	1.32	-13.22	2.27	2.22	0.38	-6.1	0.77	-3.88	0.75	0.53	0.17	0.16	0.05	0.69	0.13	2.75	0.43	-5.94	0.74	-3.19	0.83	-15.4	1.97	-1
	155	156	MET	388	7.08	2.05	11.04	1.4	18.12	2.61	-4.02	0.66	-1.4	0.65	-5.42	1.07	-1.34	0.62	-11.44	1.43	-12.79	1.47	1.72	2.3	-1.8	1.79	-0.08	2.93	0.79	0.59	-3.17	0.47	-2.38	0.68	0.38	0.07	0.02	0.01	0.4	0.07	1.17	0.58	-3.15	0.47	-1.98	0.66	2.88	2.2	-4.95
	156	157	THR	389	6.29	1.35	10.65	1.56	16.94	2.26	-1.27	0.65	-0.05	0.76	-1.32	1.08	-21.85	1.09	-8.6	1.3	-30.45	1.61	-16.83	1.82	2	1.8	-14.83	2.72	-2.64	0.84	-7.42	0.8	-10.06	1.01	0.41	0.07	0.13	0.03	0.53	0.06	-2.23	0.85	-7.3	0.8	-9.53	1.02	-19.06	1.6	-5.3
	157	158	GLY	390	0	0	9.12	1.36	9.12	1.36	0	0	-0.1	0.58	-0.1	0.58	0	0	-5.62	1.48	-5.62	1.48	0	0	3.41	1.97	3.41	1.97	0	0	-8.17	0.9	-8.17	0.9	0	0	0.64	0.02	0.64	0.02	0	0	-7.52	0.91	-7.52	0.91	0	0	-4.12
	158	159	ASP	391	4.08	1.51	12.04	1.46	16.12	2.28	-0.29	1.1	-0.3	0.6	-0.59	1.14	-14.99	5.29	-0.1	1.23	-15.09	5.35	-11.2	5	11.64	1.94	0.44	5.55	-52.96	4.55	-12.1	1.03	-65.06	4.7	0.38	0.05	0.23	0.03	0.62	0.05	-52.58	4.52	-11.87	1.03	-64.45	4.67	-63.78	1.72	-0.23
	159	160	THR	392	6.74	1.38	11.82	1.45	18.56	2.09	-0.89	1.27	-0.91	0.97	-1.79	1.82	-31.91	1.77	-12.43	1.23	-44.34	2.04	-26.06	2.09	-1.51	1.6	-27.57	2.71	3.37	0.48	-3.33	0.51	0.05	0.63	0.02	0.02	0.05	0.02	0.08	0.03	3.4	0.48	-3.27	0.51	0.12	0.63	-22.66	1.85	-4.78
	160	161	TYR	393	8.86	2.1	10.76	1.46	19.62	2.8	-5.19	1.13	-2.5	0.77	-7.69	1.31	-26.82	1.47	-5.3	1.78	-32.12	2.44	-23.15	2.4	2.97	1.89	-20.18	3.17	1.67	0.61	-4.55	1.49	-2.88	1.51	0.01	0.01	0.04	0.03	0.05	0.02	1.69	0.6	-4.52	1.48	-2.83	1.5	-21.46	2.25	-1.55
	161	162	THR	394	6.49	1.46	10.78	1.43	17.27	2.1	-2.39	0.8	-0.91	0.79	-3.3	1.06	-23.78	1.63	-13.14	1.38	-36.92	2.08	-19.67	2.39	-3.27	1.88	-22.95	2.79	0.31	1.24	-1.59	0.9	-1.28	1.43	0.23	0.09	0.05	0.01	0.28	0.09	0.54	1.15	-1.54	0.9	-1	1.36	-19.13	1.71	-4.81
	162	163	ALA	395	2.77	0.87	10.63	1.34	13.4	1.76	-0.22	0.4	-0.5	0.65	-0.71	0.94	2.07	0.15	1.92	1.61	3.99	1.66	4.62	0.94	12.05	1.8	16.68	2.11	-0.08	0.11	-7.7	0.84	-7.78	0.88	0.48	0.06	0.24	0.06	0.72	0.1	0.4	0.16	-7.46	0.87	-7.06	0.94	5.03	0.98	4.59
	163	164	HIS	396	25.45	2.03	10.08	1.28	35.53	2.5	-4.57	0.96	-0.32	0.92	-4.89	1.42	-11.7	2.4	-6.63	2.25	-18.33	2.71	9.17	3.17	3.13	2.54	12.31	3.71	-4.05	1.92	-4.69	1.88	-8.74	2.3	0.33	0.09	0.15	0.05	0.48	0.09	-3.71	1.88	-4.54	1.86	-8.26	2.29	5.46	2.25	-1.41
	164	165	ALA	397	2.74	0.77	10.27	1.72	13.01	2.01	-0.19	0.24	0.46	0.61	0.27	0.71	2.25	0.12	-3.51	1.18	-1.27	1.2	4.8	0.84	7.21	1.97	12.02	2.32	-0.15	0.08	-6.7	1.34	-6.85	1.35	0.48	0.04	0.35	0.06	0.83	0.09	0.33	0.09	-6.35	1.29	-6.02	1.28	5.13	0.83	0.86
	165	166	GLY	398	0	0	9.41	1.52	9.41	1.52	0	0	-0.44	0.73	-0.44	0.73	0	0	-5.81	3.15	-5.81	3.15	0	0	3.16	3.5	3.16	3.5	0	0	-6.38	2.33	-6.38	2.33	0	0	0.35	0.13	0.35	0.13	0	0	-6.03	2.31	-6.03	2.31	0	0	-2.86
	166	167	ALA	399	2.68	0.89	9.85	1.25	12.53	1.7	-0.81	0.34	-1.08	0.8	-1.88	0.92	2.27	0.16	1.62	2.41	3.88	2.46	4.14	0.93	10.4	2.3	14.53	2.47	-0.11	0.09	-3.3	1.59	-3.41	1.63	0.22	0.14	0.1	0.05	0.32	0.17	0.11	0.19	-3.2	1.6	-3.09	1.74	4.25	0.99	7.2
	167	168	LYS	400	11.34	2.67	10.27	1.41	21.61	3.23	-3.06	0.78	-1.29	0.8	-4.34	1.25	-18.94	7.93	-3.89	1.72	-22.83	7.9	-10.65	8.29	5.09	1.71	-5.56	8.23	-6.17	7.76	-3.38	1.35	-9.55	7.64	0.54	0.06	0.05	0.02	0.6	0.07	-5.63	7.73	-3.32	1.35	-8.95	7.61	-16.28	2.53	1.77
	168	169	PHE	401	7.81	1.83	11.26	1.4	19.07	2.52	-3.88	0.77	-1.65	0.9	-5.54	1.33	0.23	0.99	-5.37	1.13	-5.14	1.58	4.15	2.48	4.24	1.65	8.39	3.4	-0.12	0.65	-0.32	0.77	-0.44	1.31	0.1	0.05	0	0	0.1	0.05	-0.02	0.62	-0.32	0.77	-0.35	1.28	4.13	2.16	3.92
	169	170	PRO	402	12.69	1.7	14.32	1.11	27	2.24	-3.48	0.65	-2.83	0.83	-6.3	1.02	-8.58	1.18	-0.72	2.23	-9.3	1.64	0.63	2.19	10.77	2.17	11.4	2.64	8.03	1.13	-9	1.13	-0.97	0.41	0.04	0.02	0	0	0.04	0.02	8.07	1.12	-9	1.13	-0.93	0.41	8.7	1.79	1.77
	170	171	ILE	403	9.56	2.01	13.04	1.33	22.6	2.43	-2.77	0.85	-2.12	0.74	-4.89	1.31	-5.28	0.32	0.54	1.02	-4.73	1.02	1.51	2.1	11.47	1.63	12.98	2.49	3.33	0.26	-6.22	0.65	-2.89	0.63	0.13	0.05	0	0.01	0.13	0.05	3.46	0.26	-6.22	0.65	-2.76	0.61	4.97	2.05	5.25
	171	172	LYS	404	11.23	2.1	10.8	1.38	22.03	2.32	-4.22	0.76	-2.48	0.79	-6.7	1.11	-39.66	4.83	-2.48	0.91	-42.14	5.07	-32.65	5.19	5.85	1.42	-26.8	5.42	15.49	4.49	-5.08	0.53	10.41	4.63	0.32	0.07	0	0	0.32	0.07	15.81	4.45	-5.08	0.54	10.73	4.59	-16.84	2.57	0.76
	172	173	TRP	405	11.24	2.19	9.63	1.38	20.87	2.77	-8.33	0.83	-2.14	0.7	-10.47	1.13	-0.28	1.31	-9.86	0.99	-10.14	1.63	2.63	2.66	-2.37	1.47	0.26	3.24	3.58	0.46	-4.38	0.57	-0.81	0.6	0.09	0.02	0.01	0.02	0.1	0.03	3.66	0.46	-4.37	0.56	-0.71	0.59	6.3	2.51	-6.74
	173	174	THR	406	6.79	1.75	10.15	1.25	16.95	2.37	-3.25	0.73	-1.82	0.67	-5.08	1.06	-25.27	1.37	-9.66	1.37	-34.93	2.09	-21.73	2.36	-1.33	1.79	-23.06	3.05	2.23	0.76	-5.18	0.72	-2.95	1.09	0.01	0.01	0.04	0.02	0.05	0.02	2.24	0.76	-5.14	0.72	-2.9	1.08	-19.5	1.94	-6.47
	174	175	ALA	407	2.54	0.72	11.26	1.44	13.81	1.81	-2.31	0.39	-2	0.76	-4.31	0.83	2.31	0.12	0.81	1.18	3.12	1.22	2.54	0.8	10.08	1.61	12.62	2.03	-0.07	0.05	-0.08	0.37	-0.15	0.39	0	0	0.01	0.01	0.02	0.01	-0.07	0.05	-0.07	0.37	-0.13	0.39	2.47	0.79	10.01
	175	176	PRO	408	12.57	1.49	14.6	1.31	27.18	1.97	-4.25	0.61	-2.92	0.7	-7.17	0.91	-10.4	0.7	-1.78	0.9	-12.18	0.84	-2.08	1.77	9.9	1.58	7.82	2.13	9.55	0.65	-9.89	0.66	-0.34	0.59	0.02	0.01	0	0	0.02	0.01	9.57	0.64	-9.89	0.66	-0.31	0.59	7.5	1.67	0.01
	176	177	GLU	409	7.39	1.72	10.99	1.26	18.38	2.29	-1.91	1.39	-2.09	0.84	-4	1.78	-21.12	4.6	-10.48	1.16	-31.6	4.97	-15.64	4.28	-1.58	1.53	-17.22	4.75	-42.61	3.72	-3.3	0.54	-45.92	3.77	0.12	0.03	0.01	0.01	0.13	0.03	-42.5	3.71	-3.3	0.54	-45.79	3.76	-58.14	2.06	-4.88
	177	178	SER	410	3.79	1.13	11.1	1.27	14.89	1.84	-1.83	0.91	-3.18	0.86	-5.01	1.36	-6	1.35	-6.71	0.94	-12.71	1.56	-4.03	1.57	1.21	1.27	-2.82	2.15	0.44	0.46	-3.02	0.67	-2.58	0.63	0	0	0.01	0.01	0.01	0.01	0.44	0.46	-3.01	0.67	-2.57	0.62	-3.59	1.5	-1.79
	178	179	LEU	411	9.13	1.8	12.07	1.49	21.2	2.43	-2.54	1.05	-1.32	0.8	-3.86	1.41	-27.13	0.41	-2.95	0.89	-30.08	1.04	-20.54	1.97	7.8	1.49	-12.74	2.44	3.26	0.23	-6.86	0.73	-3.61	0.71	0.14	0.07	0.11	0.04	0.25	0.07	3.4	0.21	-6.75	0.71	-3.36	0.71	-17.15	1.98	1.05
	179	180	ALA	412	2.64	0.8	11.51	1.49	14.15	1.98	-1.33	0.42	-0.95	0.64	-2.28	0.72	2.12	0.14	-6.7	1	-4.59	0.98	3.43	0.9	3.86	1.6	7.28	2.02	0.03	0.07	-4.52	0.5	-4.49	0.52	0.08	0.04	0.27	0.02	0.35	0.04	0.11	0.08	-4.25	0.5	-4.14	0.52	3.54	0.9	-0.39
	180	181	TYR	413	8.4	1.72	9.98	1.59	18.38	2.61	0.55	0.56	-0.05	0.69	0.5	0.88	-16.01	0.69	-6.63	1.11	-22.64	1.24	-7.05	2.02	3.29	1.5	-3.76	2.51	-6.57	0.67	-2.54	1.03	-9.11	1.13	0.94	0.08	0.16	0.03	1.09	0.07	-5.64	0.64	-2.38	1.01	-8.01	1.11	-12.69	1.81	0.92
	181	182	ASN	414	11.59	1.6	10.24	1.54	21.83	2.23	-1.11	0.67	-0.79	0.59	-1.9	1.01	-77.59	2.39	-4.3	1.38	-81.89	2.72	-67.11	2.12	5.15	1.87	-61.96	2.7	-8.2	1.46	-1.05	1.08	-9.25	1.79	0.46	0.07	0.09	0.02	0.55	0.08	-7.75	1.47	-0.95	1.06	-8.7	1.77	-74.86	1.38	4.2
	182	183	LYS	415	10.96	2.25	10.06	1.24	21.02	2.69	-1.79	0.68	-0.75	0.92	-2.54	1.21	-8.36	3.02	-4.89	1.04	-13.25	3.24	0.81	3.98	4.42	1.4	5.23	4.17	-18.41	3.15	-4.23	0.54	-22.64	3.27	0.98	0.05	0.04	0.02	1.02	0.05	-17.43	3.14	-4.19	0.54	-21.62	3.26	-16.62	2.26	0.23
	183	184	PHE	416	7.69	1.62	10.09	1.11	17.78	2.01	-3.42	0.65	-1.33	0.49	-4.75	0.84	-0.5	0.53	-10.5	1.08	-11	1.2	3.77	1.81	-1.74	1.54	2.02	2.49	0.41	0.33	-3.13	0.68	-2.72	0.69	0.12	0.03	0.19	0.02	0.32	0.05	0.54	0.33	-2.94	0.67	-2.41	0.68	4.3	1.76	-4.68
	184	185	SER	417	3.26	1.09	9.91	1.19	13.17	1.66	-1.35	0.53	-0.89	0.94	-2.24	1.13	-1.79	1.7	-4.75	1.32	-6.55	2.37	0.12	1.91	4.26	1.62	4.38	2.68	-3.06	1.39	-4.69	0.74	-7.75	1.74	0.28	0.04	0.03	0.01	0.31	0.04	-2.78	1.38	-4.66	0.74	-7.44	1.74	-2.67	1.29	-0.4
	185	186	ILE	418	10.01	2.06	11.29	1.68	21.31	2.93	-2.04	1.06	-1.2	0.76	-3.23	1.42	-6.85	0.44	6.11	1.17	-0.74	1.17	1.12	2.47	16.21	1.66	17.33	3.11	4.62	0.39	-10.02	0.85	-5.4	0.85	0.25	0.05	0.01	0.01	0.26	0.06	4.87	0.39	-10.01	0.85	-5.14	0.84	5.99	2.32	6.2
	186	187	LYS	419	11.39	2.3	10.49	1.39	21.88	2.62	-2.23	0.79	-0.67	0.93	-2.9	1.21	-33.12	8.48	-8.23	1.15	-41.36	8.96	-23.96	7.87	1.59	1.47	-22.38	8.11	7.28	9.27	-4	0.64	3.28	9.63	0.65	0.11	0.01	0.01	0.66	0.11	7.94	9.18	-3.99	0.64	3.94	9.54	-16.03	2.96	-2.41
	187	188	SER	420	3.6	1.06	10.95	1.45	14.55	1.87	-2.13	0.83	-2.13	0.75	-4.26	1.23	-10.85	2.08	-14.03	0.91	-24.88	2.3	-9.38	2.19	-5.2	1.51	-14.58	2.45	3.86	0.66	-4.13	0.49	-0.26	0.7	0.02	0.01	0.01	0.01	0.03	0.01	3.88	0.66	-4.11	0.49	-0.23	0.7	-5.5	1.77	-9.31
	188	189	ASP	421	4.71	1.48	11.18	1.4	15.89	2.13	-4.19	0.65	-2.02	0.69	-6.21	0.99	6.47	4.32	-1.63	0.96	4.84	4.81	7	3.9	7.53	1.45	14.53	4.29	-63.6	4.11	-9.25	0.5	-72.85	4.4	0.01	0.01	0	0	0.02	0.01	-63.59	4.11	-9.24	0.5	-72.84	4.4	-56.59	1.34	-1.71
	189	190	VAL	422	6.47	1.69	11.22	1.45	17.7	2.37	-3.63	0.79	-1.71	0.97	-5.33	1.26	-22.7	0.49	-6.17	1.09	-28.88	1.15	-19.86	1.87	3.34	1.52	-16.51	2.28	7.19	0.39	-8.22	0.47	-1.03	0.45	0	0	0	0	0	0	7.19	0.39	-8.22	0.47	-1.02	0.45	-12.67	1.8	-4.87
	190	191	TRP	423	11.19	2.21	10.97	1.31	22.16	2.51	-10.08	0.86	-3.07	0.81	-13.15	1.26	4.49	0.91	-9.7	1.03	-5.21	1.31	5.6	2.53	-1.8	1.52	3.79	3.04	1.04	0.47	-2.9	0.41	-1.86	0.59	0.01	0.01	0	0	0.01	0.01	1.05	0.47	-2.9	0.41	-1.86	0.59	6.64	2.43	-4.7
	191	192	ALA	424	2.58	0.76	10.94	1.31	13.52	1.72	-1.9	0.26	-3.45	0.72	-5.35	0.78	2.11	0.13	-8.61	0.95	-6.5	0.99	2.79	0.81	-1.13	1.46	1.67	1.88	-0.14	0.07	-0.87	0.42	-1	0.45	0.05	0.01	0	0	0.05	0.01	-0.09	0.06	-0.87	0.42	-0.96	0.44	2.7	0.8	-1.99
	192	193	PHE	425	7.78	1.68	10.18	1.42	17.95	2.11	-4.75	0.64	-2.24	0.86	-7	1.03	0.3	0.24	-8.44	0.92	-8.14	1.02	3.32	1.91	-0.5	1.53	2.82	2.35	0.32	0.18	-2.13	0.35	-1.81	0.4	0	0	0	0	0	0	0.33	0.18	-2.13	0.35	-1.81	0.4	3.65	1.88	-2.64
	193	194	GLY	426	0	0	9.26	1.22	9.26	1.22	0	0	-5.03	0.77	-5.03	0.77	0	0	-8.11	1	-8.11	1	0	0	-3.88	1.31	-3.88	1.31	0	0	-1.15	0.46	-1.15	0.46	0	0	0	0	0	0	0	0	-1.15	0.46	-1.15	0.46	0	0	-5.03
	194	195	VAL	427	5.9	1.77	11.02	1.32	16.92	2.25	-3.83	0.71	-1.92	0.92	-5.75	1.2	-21.49	0.42	-5.84	0.96	-27.33	1	-19.43	1.83	3.27	1.56	-16.16	2.39	6.35	0.28	-7.5	0.43	-1.15	0.36	0	0	0	0	0	0	6.35	0.28	-7.5	0.43	-1.15	0.36	-13.08	1.79	-4.24
	195	196	LEU	428	9.28	1.77	11.61	1.49	20.9	2.43	-3.77	0.95	-2.32	0.84	-6.09	1.42	-28.75	0.33	-3.6	0.86	-32.34	0.95	-23.24	1.91	5.7	1.57	-17.54	2.23	4.68	0.22	-5.53	0.41	-0.85	0.37	0	0	0	0	0	0	4.68	0.22	-5.53	0.41	-0.85	0.37	-18.56	1.88	0.16
	196	197	LEU	429	9.08	1.88	11.6	1.42	20.68	2.45	-3.89	0.95	-2.13	0.87	-6.02	1.28	-28.25	0.48	-5.39	0.71	-33.64	0.79	-23.06	2.07	4.08	1.56	-18.98	2.62	4.66	0.21	-5.51	0.45	-0.85	0.42	0.01	0.01	0	0	0.01	0.01	4.67	0.21	-5.51	0.45	-0.84	0.42	-18.39	2.1	-1.43
	197	198	TRP	430	11.22	2.34	11.28	1.5	22.5	2.74	-9.63	0.92	-2.93	0.93	-12.57	1.4	3.36	0.7	-14.07	0.98	-10.71	1.31	4.94	2.5	-5.73	1.58	-0.78	2.77	1.65	0.33	-2.59	0.4	-0.94	0.55	0.04	0.03	0	0	0.04	0.03	1.69	0.32	-2.59	0.4	-0.9	0.55	6.64	2.46	-8.32
	198	199	GLU	431	6.71	1.86	11.65	1.34	18.36	2.5	-5.95	0.9	-3.19	0.8	-9.14	1.18	12.18	3.18	-2.9	1	9.29	3.46	12.94	3.86	5.56	1.67	18.5	4.5	-66.14	2.96	-8.66	0.56	-74.8	3.26	0.01	0.01	0	0	0.01	0.01	-66.14	2.96	-8.66	0.56	-74.79	3.26	-53.19	1.86	-3.1
	199	200	ILE	432	9.59	1.93	12.04	1.28	21.63	2.3	-3.67	1.19	-1.61	0.79	-5.28	1.4	-7.57	0.31	-3.97	0.88	-11.54	0.87	-1.65	2.17	6.45	1.54	4.81	2.45	5.8	0.28	-7.66	0.59	-1.86	0.48	0.02	0.01	0	0	0.02	0.01	5.82	0.28	-7.66	0.59	-1.84	0.48	4.17	2.12	-1.21
	200	201	ALA	433	2.71	0.75	10.63	1.34	13.34	1.7	-1.69	0.37	-2.54	0.68	-4.23	0.82	2.41	0.12	-7.34	1.1	-4.93	1.12	3.43	0.89	0.75	1.46	4.18	1.84	-0.36	0.07	-2.49	0.86	-2.85	0.88	0.03	0.02	0.03	0.02	0.05	0.03	-0.33	0.07	-2.46	0.86	-2.8	0.88	3.09	0.9	-1.71
	201	202	THR	434	6.89	1.55	10.06	1.39	16.94	2.24	-2.8	0.79	-0.89	0.77	-3.69	1.2	-29.17	1.04	-10.63	1.7	-39.79	1.82	-25.09	1.8	-1.46	1.89	-26.54	2.63	3.38	0.38	-4.46	1.08	-1.08	1.14	0.02	0.02	0.04	0.03	0.07	0.03	3.4	0.38	-4.41	1.06	-1.01	1.12	-21.68	1.72	-5.87
	202	203	TYR	435	9.22	2.12	9.91	1.29	19.13	2.82	-3.24	0.86	-2.33	0.71	-5.57	1.25	-18.49	0.79	-4.56	1.11	-23.05	1.3	-12.51	2.42	3.02	1.96	-9.49	3.35	-2.11	0.6	-4	0.88	-6.11	1.05	0.14	0.04	0.04	0.01	0.18	0.04	-1.97	0.6	-3.96	0.88	-5.93	1.04	-14.48	2.32	-0.94
	203	204	GLY	436	0	0	11	1.47	11	1.47	0	0	-2.55	0.92	-2.55	0.92	0	0	-17	1.87	-17	1.87	0	0	-8.56	2.05	-8.56	2.05	0	0	2.16	0.87	2.16	0.87	0	0	0.02	0.01	0.02	0.01	0	0	2.18	0.86	2.18	0.86	0	0	-6.38
	204	205	MET	437	6.99	1.76	9.86	1.3	16.84	2.36	-2.6	0.66	-1.49	0.78	-4.09	1.05	-1.51	0.69	-0.88	0.83	-2.4	1.19	2.88	1.96	7.48	1.46	10.36	2.6	0.7	0.63	-8.41	0.55	-7.71	0.88	0.75	0.08	0.03	0.01	0.78	0.08	1.45	0.62	-8.38	0.55	-6.93	0.87	4.32	1.88	-0.89
	205	206	SER	438	3.65	0.84	11.71	1.27	15.36	1.75	-1.02	0.44	-0.28	0.65	-1.3	0.85	-2.22	1.93	5.67	1.18	3.45	2.6	0.42	2.1	17.1	1.64	17.52	2.93	-2.56	1.56	-7.82	0.86	-10.37	1.87	0.35	0.04	0.07	0.02	0.42	0.05	-2.21	1.55	-7.75	0.86	-9.95	1.86	-1.79	1.22	9.36
	206	207	PRO	439	12.49	1.51	13.44	1.27	25.93	1.99	-4.19	0.7	-2.75	0.72	-6.93	1	-11.07	0.93	0.51	2.27	-10.55	1.87	-2.76	1.91	11.21	2.4	8.45	2.63	10.37	0.81	-9.46	1.71	0.91	1.3	0.01	0.01	0	0	0.01	0.01	10.37	0.81	-9.45	1.71	0.92	1.29	7.61	1.62	1.75
	207	208	TYR	440	9.14	2.02	13.01	1.47	22.15	2.72	-4.08	0.85	-0.52	0.78	-4.6	1.2	-20.25	1.43	3.05	1.34	-17.2	1.5	-15.18	2.32	15.54	2.01	0.35	2.83	-0.3	0.5	-3.7	1	-4	0.94	0.02	0.01	0.02	0.01	0.04	0.01	-0.28	0.5	-3.69	1	-3.96	0.94	-15.46	2.2	11.85
	208	209	PRO	441	12.14	1.41	12.53	1.24	24.68	2.06	-2.06	0.5	-0.63	0.7	-2.69	0.88	-11.67	1.01	7.91	1.5	-3.76	1.15	-1.59	1.85	19.82	1.92	18.23	2.12	10.9	0.96	-15.91	1.32	-5.01	0.92	0.31	0.07	0.09	0.02	0.4	0.07	11.21	0.92	-15.82	1.31	-4.61	0.92	9.62	1.48	4
	209	210	GLY	442	0	0	10.12	1.61	10.12	1.61	0	0	-0.58	0.5	-0.58	0.5	0	0	-5.32	0.8	-5.32	0.8	0	0	4.23	1.6	4.23	1.6	0	0	-7.4	0.48	-7.4	0.48	0	0	0.7	0.02	0.7	0.02	0	0	-6.7	0.49	-6.7	0.49	0	0	-2.48
	210	211	ILE	443	10.45	2.21	10.19	1.42	20.64	2.84	-2.53	0.98	1.27	0.9	-1.27	1.42	-7.3	0.36	-4.48	0.85	-11.78	0.94	0.62	2.35	6.97	1.7	7.59	3.13	5.09	0.31	-8.25	0.76	-3.16	0.78	0.16	0.06	0.14	0.04	0.31	0.06	5.25	0.32	-8.11	0.75	-2.86	0.76	5.88	2.32	-1.14
	211	212	ASP	444	4.56	1.71	10.54	1.43	15.09	2.45	-0.54	1.14	-1.05	0.79	-1.59	1.48	10.85	5.83	0.26	1.5	11.11	6.14	14.87	5.38	9.74	2.02	24.61	5.87	-77.39	4.72	-10.86	0.96	-88.25	4.97	0.49	0.06	0.09	0.03	0.58	0.06	-76.9	4.7	-10.77	0.94	-87.67	4.95	-62.04	1.73	-1.02
	212	213	LEU	445	8.75	1.74	11.12	1.54	19.87	2.66	-1.49	0.95	-0.64	0.75	-2.13	1.34	-26.78	0.5	-1.41	0.85	-28.18	0.96	-19.52	2.06	9.07	1.74	-10.45	2.79	3.18	0.29	-6.73	0.62	-3.54	0.67	0.35	0.08	0.09	0.03	0.44	0.08	3.54	0.29	-6.64	0.61	-3.1	0.65	-15.98	2.02	2.44
	213	214	SER	446	3.6	1.1	10.14	1.59	13.74	2.17	0.04	0.83	0.49	0.78	0.53	1.2	-7.79	2.65	-8.26	1.51	-16.05	2.83	-4.15	2.35	2.38	1.99	-1.77	2.79	0.5	1.44	-6.66	1.29	-6.16	1.73	0.48	0.06	0.28	0.04	0.76	0.06	0.97	1.4	-6.38	1.29	-5.4	1.71	-3.18	1.45	-4
	214	215	GLN	447	13.44	2.18	10.04	1.51	23.48	2.81	-1.36	0.85	-0.17	0.91	-1.54	1.4	-66.97	3.66	-5.08	1.92	-72.05	4.46	-54.89	3.65	4.79	2.13	-50.1	4.55	-8.16	2.67	-3.69	1.08	-11.84	3.18	0.67	0.09	0.03	0.02	0.69	0.11	-7.49	2.62	-3.66	1.07	-11.15	3.11	-62.38	1.87	1.13
	215	216	VAL	448	6.53	1.72	11.72	1.64	18.25	2.66	-2.61	0.8	-0.89	0.89	-3.51	1.32	-20.45	0.44	-6.48	0.92	-26.92	1.02	-16.53	1.73	4.35	1.61	-12.18	2.54	5.73	0.29	-7.67	0.48	-1.94	0.47	0.02	0.02	0	0	0.02	0.02	5.75	0.28	-7.67	0.48	-1.92	0.46	-10.78	1.69	-3.32
	216	217	TYR	449	8.64	2.3	11.04	1.24	19.68	2.69	-2.09	0.81	-1.99	0.87	-4.08	1.2	-19.8	2.46	-7.41	1.19	-27.2	3.23	-13.24	3.19	1.64	1.59	-11.6	3.67	-1.45	1.74	-5.04	1.03	-6.49	2.44	0.41	0.1	0.02	0.01	0.42	0.1	-1.04	1.68	-5.02	1.03	-6.06	2.37	-14.29	2.34	-3.38
	217	218	GLU	450	5.99	1.64	10.82	1.64	16.82	2.33	-1.2	0.68	-1.56	0.77	-2.76	1.05	36.89	9.09	0.17	2.17	37.06	9.97	41.68	9.3	9.43	2.82	51.12	10.24	-99.8	9.09	-9.39	1.68	-109.19	9.77	0.71	0.09	0.02	0.02	0.73	0.09	-99.09	9.04	-9.37	1.67	-108.46	9.72	-57.41	1.56	0.07
	218	219	LEU	451	9.09	1.97	11.63	1.36	20.72	2.75	-2.11	0.83	-1.82	0.81	-3.94	1.24	-27.86	0.48	-0.15	1.2	-28	1.27	-20.88	2.09	9.66	1.8	-11.22	2.91	4.09	0.3	-6.91	0.69	-2.82	0.64	0.34	0.08	0	0	0.34	0.08	4.42	0.31	-6.91	0.69	-2.49	0.66	-16.45	2.06	2.75
	219	220	LEU	452	8.79	1.74	11.4	1.19	20.2	2.16	-3.56	1.09	-2.32	0.93	-5.88	1.46	-27.63	0.44	-8.88	1.75	-36.52	1.76	-22.4	2.01	0.2	1.95	-22.2	2.8	3.97	0.22	-5.65	0.94	-1.68	0.9	0.01	0.01	0.01	0.01	0.02	0.02	3.98	0.22	-5.64	0.94	-1.66	0.89	-18.42	2	-5.44
	220	221	GLU	453	6.48	1.8	11.07	1.28	17.56	2.38	-2.08	0.63	-1.01	0.85	-3.09	1.1	36.78	5.77	3.25	1.38	40.03	6.34	41.19	6.34	13.32	1.74	54.5	7.12	-98.98	5.95	-11.51	1.06	-110.49	6.31	0.6	0.09	0.16	0.03	0.76	0.09	-98.38	5.9	-11.35	1.06	-109.73	6.26	-57.2	1.66	1.97
	221	222	LYS	454	11.77	2.41	10.9	1.75	22.67	3.01	-0.14	0.78	0.16	0.84	0.02	1.13	-48.53	9.99	-7.9	1.29	-56.43	9.51	-36.89	10.86	3.16	2	-33.73	10.45	20.66	10.36	-4.5	1.06	16.16	9.76	1.07	0.14	0.18	0.05	1.25	0.11	21.73	10.24	-4.33	1.03	17.41	9.67	-15.16	2.63	-1.16
	222	223	ASP	455	4.4	1.39	11.9	1.44	16.31	2.15	-0.49	0.52	-0.38	0.62	-0.87	0.93	27.39	4.02	-3.76	1.72	23.63	4.54	31.3	4.65	7.77	1.99	39.07	5.37	-92.37	4.31	-14.67	1.3	-107.03	4.81	0.69	0.08	0.1	0.03	0.79	0.08	-91.67	4.25	-14.57	1.29	-106.25	4.76	-60.38	1.32	-6.8
	223	224	TYR	456	9.13	2.02	10.27	1.24	19.41	2.47	-3.35	0.72	0.09	1.02	-3.27	1.36	-19.97	0.97	-3.14	1.13	-23.12	1.65	-14.2	2.3	7.22	1.59	-6.98	2.97	-1.16	0.67	-2.41	0.71	-3.57	1.07	0.33	0.05	0.06	0.01	0.39	0.06	-0.83	0.64	-2.36	0.71	-3.18	1.03	-15.02	2.18	4.86
	224	225	ARG	457	13.46	2.79	10.15	1.22	23.61	3.09	-5.72	1.18	-0.9	0.68	-6.62	1.46	-238.48	4.84	-0.25	0.74	-238.73	4.78	-230.74	5.65	9	1.54	-221.74	5.82	51.67	4.37	-7.15	0.58	44.52	4.31	0.16	0.06	0.13	0.02	0.29	0.07	51.83	4.35	-7.02	0.57	44.81	4.29	-178.92	2.63	1.98
	225	226	MET	458	6.7	1.72	9.85	1.3	16.55	2.16	-6.68	0.77	-1.46	0.69	-8.14	1.08	-3.22	0.41	-9.73	0.82	-12.95	0.87	-3.2	1.87	-1.34	1.52	-4.54	2.54	2.43	0.24	-6	0.69	-3.57	0.71	0.01	0.01	0.02	0.01	0.03	0.02	2.43	0.24	-5.98	0.69	-3.55	0.71	-0.77	1.83	-7.32
	226	227	GLU	459	6.01	1.63	10.03	1.24	16.05	2.1	-0.88	0.58	-0.47	0.87	-1.35	1.09	41.94	2.65	5.63	1.08	47.56	2.91	47.07	3.27	15.19	1.59	62.26	3.7	-104.6	2.81	-9.42	0.74	-114.02	3.01	0.84	0.08	0.07	0.03	0.91	0.07	-103.76	2.79	-9.35	0.74	-113.1	2.99	-56.69	1.64	5.84
	227	228	ARG	460	12.65	2.61	11.76	1.26	24.41	2.99	-3.52	1.19	-0.05	0.7	-3.57	1.55	-240.27	9.06	12.74	1.12	-227.53	9.09	-231.14	9.12	24.45	1.59	-206.69	9.33	50.62	7.64	-9.85	0.86	40.77	7.6	0.62	0.06	0.14	0.03	0.75	0.06	51.24	7.6	-9.72	0.87	41.52	7.57	-179.9	2.75	14.73
	228	229	PRO	461	12.11	1.36	13.11	1.07	25.22	1.82	-3.85	0.68	-1.48	0.62	-5.32	0.88	-12.92	0.75	-1.31	1.3	-14.23	1.19	-4.66	1.56	10.33	1.63	5.67	2.25	12.08	0.67	-11.96	1.14	0.12	0.95	0	0.01	0.04	0.02	0.05	0.02	12.08	0.67	-11.92	1.13	0.17	0.94	7.42	1.39	-1.59
	229	230	GLU	462	6.08	1.7	9	1.22	15.08	2.16	-0.18	0.59	-0.03	0.75	-0.21	1.09	36.31	4.95	4.38	2.04	40.68	6.09	42.2	5.37	13.35	2.37	55.56	6.79	-99.96	5.18	-13.26	1.84	-113.22	6.31	1	0.08	0.14	0.05	1.14	0.1	-98.96	5.16	-13.12	1.81	-112.08	6.28	-56.76	1.63	0.24
	230	231	GLY	463	0	0	9.37	1.37	9.37	1.37	0	0	-0.89	0.52	-0.89	0.52	0	0	-7.91	2.08	-7.91	2.08	0	0	0.57	2.26	0.57	2.26	0	0	-5.03	1.5	-5.03	1.5	0	0	0.48	0.07	0.48	0.07	0	0	-4.55	1.46	-4.55	1.46	0	0	-3.98
	231	232	CYS	464	3.46	1.01	11.43	1.49	14.89	1.87	-3.66	0.47	0.48	0.76	-3.18	0.86	6.44	0.63	-3.36	1.98	3.08	1.85	6.24	1.25	8.55	2.21	14.78	2.49	-1.58	0.25	1.24	0.95	-0.33	0.94	0.01	0.01	0.05	0.02	0.06	0.03	-1.57	0.25	1.3	0.94	-0.28	0.93	4.66	1.17	9.84
	232	233	PRO	465	12.15	1.25	13.21	1.25	25.36	2.02	-2.18	0.62	-1.67	0.71	-3.85	0.9	-10.59	1.17	2.31	1.42	-8.28	1.19	-0.62	1.83	13.86	1.89	13.24	2.59	10.16	1.1	-13.31	1	-3.14	0.89	0.27	0.09	0.07	0.02	0.35	0.09	10.44	1.15	-13.23	1	-2.8	0.92	9.81	1.43	0.63
	233	234	GLU	466	6.72	1.94	11.65	1.53	18.38	2.65	-0.35	1.2	-1.43	0.78	-1.77	1.5	18.59	7.31	5.61	1.72	24.19	7.49	24.96	7.11	15.83	1.88	40.8	7.23	-82.33	6.96	-11.48	1.39	-93.8	7.11	0.72	0.09	0.06	0.01	0.78	0.08	-81.6	6.93	-11.42	1.38	-93.03	7.08	-56.64	2.02	4.41
	234	235	LYS	467	11.45	2.38	11	1.47	22.45	2.98	-1.22	0.75	-1.36	0.68	-2.57	1.07	-58.71	7.98	-0.78	1.28	-59.49	8.1	-48.48	8.51	8.87	1.7	-39.62	8.77	31.81	8.19	-6.73	0.95	25.08	8.34	0.9	0.14	0.04	0.02	0.94	0.14	32.71	8.09	-6.69	0.94	26.02	8.24	-15.77	2.7	2.18
	235	236	VAL	468	6.17	1.65	11.1	1.41	17.26	2.34	-2.44	0.8	-1.5	0.76	-3.94	1.25	-21.41	0.47	-9.44	0.94	-30.84	0.97	-17.68	1.79	0.16	1.65	-17.52	2.58	6.28	0.36	-8.57	0.62	-2.29	0.57	0.05	0.03	0	0	0.05	0.03	6.33	0.36	-8.57	0.62	-2.24	0.56	-11.36	1.78	-8.41
	236	237	TYR	469	8.77	2.13	10.97	1.13	19.74	2.55	-4.3	0.66	-2.68	0.72	-6.99	1.07	-19.03	0.87	-11.73	0.83	-30.76	1.23	-14.57	2.34	-3.44	1.15	-18.01	2.68	-2.46	0.65	-2.05	0.54	-4.5	0.89	0.31	0.06	0	0	0.31	0.06	-2.15	0.63	-2.05	0.54	-4.2	0.87	-16.72	2.23	-5.49
	237	238	GLU	470	6.36	1.94	10.88	1.29	17.24	2.64	-1.48	0.62	-1.56	0.79	-3.04	1.01	44.61	4.83	-0.72	1.53	43.89	5.3	49.49	5.46	8.6	1.6	58.09	6.23	-106.8	5.13	-9.61	1.1	-116.41	5.41	0.77	0.07	0.03	0.02	0.8	0.07	-106.03	5.09	-9.58	1.1	-115.61	5.38	-56.55	1.64	-0.97
	238	239	LEU	471	9.12	1.94	11.75	1.47	20.87	2.64	-2.84	0.92	-1.67	0.95	-4.52	1.47	-29.04	0.42	-3.05	1.3	-32.1	1.32	-22.77	2.26	7.02	1.7	-15.75	3.12	5.09	0.29	-6.33	0.52	-1.24	0.47	0.11	0.03	0.02	0.01	0.13	0.03	5.2	0.28	-6.32	0.52	-1.11	0.47	-17.56	2.23	0.7
	239	240	MET	472	7.68	1.71	11.91	1.4	19.59	2.15	-7.53	0.71	-3.52	0.7	-11.06	1.07	-3.47	0.42	-0.58	0.92	-4.05	0.99	-3.32	1.85	7.8	1.53	4.48	2.14	3.41	0.35	-4.19	0.46	-0.77	0.53	0	0	0	0	0	0	3.41	0.35	-4.19	0.46	-0.77	0.53	0.09	1.75	3.62
	240	241	ARG	473	13.06	2.48	11.58	1.45	24.64	2.93	-3.91	0.85	-2.66	0.65	-6.57	1.05	-224.47	4.5	-6.44	1.31	-230.91	4.61	-215.32	5.22	2.48	1.57	-212.84	5.34	39.74	4.35	-3.61	0.92	36.14	4.46	0.72	0.1	0.02	0.01	0.74	0.1	40.47	4.31	-3.58	0.92	36.88	4.41	-174.86	2.33	-1.1
	241	242	ALA	474	2.77	0.89	10.96	1.21	13.74	1.69	-1.3	0.31	-2.52	0.69	-3.82	0.77	2.26	0.12	-13.64	1.03	-11.38	1.05	3.73	0.95	-5.2	1.25	-1.47	1.8	-0.14	0.07	-0.03	0.64	-0.18	0.66	0.19	0.03	0.04	0.02	0.23	0.03	0.05	0.07	0	0.64	0.05	0.65	3.78	0.94	-5.2
	242	243	CYS	475	3.28	1.12	10.49	1.41	13.77	1.94	-3.73	0.61	-3.57	0.81	-7.3	0.98	6.12	0.68	-9.56	0.89	-3.45	1.19	5.67	1.33	-2.64	1.57	3.03	2.34	-2.06	0.31	1.5	0.42	-0.56	0.56	0	0	0	0	0	0	-2.06	0.31	1.5	0.42	-0.56	0.56	3.61	1.28	-1.14
	243	244	TRP	476	11.46	2.35	10.29	1.29	21.75	2.76	-10.51	0.69	-1.22	0.9	-11.73	1.22	7.06	0.63	-13.35	1.96	-6.29	2.03	8.01	2.61	-4.28	1.92	3.72	3.35	1	0.39	0.05	0.61	1.06	0.72	0.01	0.01	0	0	0.02	0.01	1.02	0.4	0.06	0.61	1.07	0.72	9.02	2.56	-4.23
	244	245	GLN	477	13.82	2.01	9.85	1.03	23.67	2.19	-2.96	0.82	-1.41	0.77	-4.37	1.25	-74.33	2.55	-8.15	1.02	-82.48	2.62	-63.47	2.78	0.3	1.39	-63.18	2.95	-1.86	1.62	-1.63	0.45	-3.49	1.68	0.52	0.04	0	0.01	0.53	0.04	-1.34	1.62	-1.63	0.45	-2.97	1.67	-64.81	1.93	-1.33
	245	246	TRP	478	10.95	2.17	11.64	1.22	22.59	2.69	-4.37	0.81	-2.27	0.63	-6.64	1.09	9.6	1.05	-6.15	1.4	3.45	1.9	16.19	2.37	3.22	1.55	19.4	2.94	-4.45	1.07	-4.4	0.74	-8.85	1.39	0.63	0.07	0.05	0.01	0.68	0.07	-3.82	1.02	-4.35	0.74	-8.17	1.34	12.37	2.3	-1.13
	246	247	ASN	479	11.09	1.66	11.72	1.01	22.82	2.04	-2.03	0.52	-0.6	0.7	-2.62	1.04	-81.21	2.95	4.06	1.53	-77.14	4.06	-72.14	3.22	15.19	1.6	-56.95	4.19	-5.21	2.66	-5.31	0.97	-10.52	3.38	0.56	0.03	0.05	0.01	0.61	0.04	-4.65	2.64	-5.26	0.97	-9.91	3.37	-76.79	1.48	9.93
	247	248	PRO	480	12.17	1.53	14.42	1.38	26.59	2.18	-2.93	0.57	-2.9	0.65	-5.83	0.83	-6.1	1.06	2.61	2.91	-3.49	2.84	3.14	2.16	14.14	3.04	17.27	3.66	5.8	0.97	-12.24	1.99	-6.44	1.95	0.27	0.04	0	0	0.27	0.04	6.07	0.97	-12.24	1.98	-6.17	1.96	9.21	1.71	1.89
	248	249	SER	481	3.63	0.93	10.12	1.29	13.75	1.63	-0.64	0.45	-0.46	0.64	-1.1	0.91	-5.43	2.3	-5.15	1.5	-10.57	2.12	-2.44	2.3	4.51	1.77	2.08	2.37	-0.3	1.37	-10.26	1.24	-10.56	1.28	0.41	0.05	0.2	0.03	0.61	0.05	0.11	1.34	-10.06	1.24	-9.95	1.27	-2.33	1.39	-5.54
	249	250	ASP	482	4.59	1.3	9.77	1.37	14.37	1.76	-1.12	0.75	-0.56	0.69	-1.67	1.12	27.56	5	10.77	1.14	38.33	5.61	31.03	4.84	19.99	1.63	51.02	5.68	-93.08	4.81	-17.35	1.14	-110.43	5.4	0.46	0.04	0.15	0.02	0.62	0.04	-92.61	4.79	-17.2	1.13	-109.82	5.38	-61.58	1.32	2.79
	250	251	ARG	483	13.01	2.74	10.77	1.46	23.79	3.35	-7.35	1.36	0.14	0.8	-7.21	1.62	-250.35	4.73	8.76	2.34	-241.59	4.33	-244.69	4.76	19.67	2.79	-225.02	4.72	54.89	3.87	-6.91	1.95	47.99	3.41	0	0	0.09	0.03	0.09	0.04	54.89	3.87	-6.81	1.93	48.08	3.41	-189.8	2.49	12.86
	251	252	PRO	484	12.42	1.58	12.7	1.03	25.12	1.95	-3.31	0.58	-1.58	0.63	-4.89	0.9	-16.49	1.23	5.36	1.45	-11.12	0.93	-7.37	2.19	16.48	1.92	9.11	2.41	15.87	1.16	-16.24	1.18	-0.37	0.6	0.12	0.04	0.04	0.02	0.17	0.05	15.99	1.14	-16.2	1.18	-0.21	0.59	8.61	1.76	0.28
	252	253	SER	485	3.39	0.95	9.85	1.3	13.24	1.89	-1.04	0.94	-1.26	0.98	-2.29	1.47	-8.6	3.63	-8.19	1.71	-16.78	4.91	-6.25	3.4	0.41	1.9	-5.83	4.61	2.42	2.38	-5.24	0.8	-2.83	2.94	0.24	0.04	0.03	0.02	0.27	0.05	2.66	2.37	-5.21	0.79	-2.55	2.92	-3.59	1.5	-4.8
	253	254	PHE	486	8.37	2.1	11.1	1.45	19.47	2.69	-5.62	0.67	-2.17	0.99	-7.79	1.17	-0.33	0.28	-10.48	1.28	-10.8	1.31	2.42	2.31	-1.54	1.58	0.87	2.87	0.75	0.21	-1.95	0.72	-1.21	0.72	0.01	0.01	0	0	0.01	0.01	0.75	0.21	-1.95	0.72	-1.2	0.72	3.17	2.33	-3.5
	254	255	ALA	487	2.79	0.9	11.15	1.58	13.94	1.89	-1.11	0.23	-2.01	0.75	-3.12	0.79	2.35	0.18	-11.21	1.75	-8.86	1.82	4.03	0.95	-2.07	2.1	1.95	2.52	-0.42	0.12	-0.67	1.06	-1.09	1.15	0.24	0.04	0.01	0.01	0.25	0.05	-0.18	0.13	-0.66	1.06	-0.85	1.15	3.85	0.92	-2.74
	255	256	GLU	488	5.89	1.74	11.13	1.45	17.03	2.41	-1.39	1.1	-1.73	0.84	-3.12	1.47	44.53	7.69	1.86	1.33	46.39	8.29	49.04	7.28	11.26	1.98	60.3	8.19	-106.78	6.97	-11.92	1.06	-118.7	7.63	0.68	0.04	0.04	0.02	0.72	0.04	-106.1	6.96	-11.88	1.06	-117.98	7.62	-57.06	1.94	-0.62
	256	257	ILE	489	9.53	2	11.61	1.3	21.14	2.59	-3.71	1	-1.23	0.88	-4.94	1.32	-8.38	0.35	-1.97	1.25	-10.35	1.31	-2.55	2.19	8.41	1.65	5.85	2.78	6.77	0.31	-7.94	0.67	-1.17	0.62	0	0	0	0	0	0	6.77	0.31	-7.94	0.67	-1.17	0.62	4.22	2.19	0.46
	257	258	HIS	490	25.34	2.04	11.12	1.22	36.46	2.49	-5.78	0.99	-2.48	0.82	-8.26	1.32	-7.95	2.76	-8.23	1.47	-16.18	3.61	11.61	3.72	0.42	1.72	12.03	4.63	-6.78	2.42	-5.29	1.1	-12.07	3.16	0.38	0.11	0.01	0.01	0.38	0.12	-6.41	2.35	-5.28	1.1	-11.69	3.08	5.21	2.3	-4.86
	258	259	GLN	491	13.97	2.27	10.99	1.47	24.96	3.1	-1.42	0.75	-1.22	0.9	-2.64	1.14	-68.31	3.31	-8.75	1.91	-77.06	3.94	-55.76	3.52	1.02	1.98	-54.74	4.46	-6.32	2.46	-4.46	0.97	-10.78	2.74	0.79	0.08	0.03	0.03	0.82	0.1	-5.53	2.4	-4.43	0.95	-9.96	2.67	-61.3	2.21	-3.41
	259	260	ALA	492	2.79	0.9	11.14	1.39	13.93	1.81	-1.29	0.35	-1.65	0.81	-2.94	0.89	2.39	0.14	-8.41	1.78	-6.02	1.82	3.9	0.96	1.08	2.21	4.97	2.58	-0.32	0.07	-0.86	0.97	-1.18	1.01	0.14	0.05	0.07	0.03	0.21	0.05	-0.18	0.08	-0.79	0.96	-0.96	0.99	3.72	0.94	0.29
	260	261	PHE	493	8.21	2.07	11.44	1.35	19.65	2.54	-4.5	0.77	-1.96	0.77	-6.46	1.1	-0.08	0.5	-8.05	1.21	-8.13	1.34	3.64	2.25	1.43	1.66	5.07	2.85	0.73	0.27	-4.41	1.09	-3.68	1.11	0.01	0.02	0.06	0.04	0.08	0.05	0.74	0.27	-4.34	1.08	-3.6	1.09	4.38	2.26	-2.91
	261	262	GLU	494	6.59	1.84	10.36	1.26	16.94	2.44	-1.29	0.79	-0.45	0.75	-1.74	1.26	53.14	4.15	2.83	1.49	55.97	4.89	58.44	4.77	12.74	1.92	71.17	5.64	-115.56	4.51	-14.96	1.23	-130.52	4.92	0.76	0.12	0.13	0.05	0.89	0.1	-114.8	4.44	-14.83	1.23	-129.63	4.87	-56.37	1.65	-2.09
	262	263	THR	495	6.34	1.54	10.24	1.36	16.58	2.21	-0.22	0.75	0.58	0.75	0.36	1.2	-27.1	2.43	-10	3.9	-37.1	3.75	-20.98	2.84	0.81	4.07	-20.17	4.18	2.25	1.96	-5.51	3.3	-3.26	3.11	0.56	0.06	0.12	0.08	0.67	0.12	2.81	1.95	-5.39	3.24	-2.59	3.03	-18.17	1.63	-4.58
	263	264	MET	496	7.71	1.73	10.59	1.48	18.3	2.6	-4.85	0.94	-0.35	0.74	-5.2	1.22	-4.91	0.9	2.52	3.28	-2.38	3.58	-2.05	1.96	12.76	3.19	10.71	4.1	4.29	0.71	-8.15	2.69	-3.86	2.95	0.1	0.07	0.14	0.05	0.23	0.09	4.39	0.7	-8.01	2.68	-3.62	2.93	2.34	1.93	4.75
	264	265	PHE	497	8.38	1.97	6.47	1.44	14.85	2.82	1.37	0.83	0.25	0.53	1.62	1.03	59.88	11.63	-6.93	4.91	52.95	6.95	69.62	11.86	-0.2	5.24	69.42	7.25	-193.28	11.28	67.18	4.67	-126.1	6.7	1.64	0.17	0.08	0.03	1.72	0.16	-191.64	11.3	67.26	4.67	-124.39	6.71	-122.02	2.39	67.06
	265	266	LIG	498	23.49	3.14	0	0	23.49	3.14	-0.51	2.4	0	0	-0.51	2.4	0.6	13.02	0	0	0.6	13.02	23.58	14.92	0	0	23.58	14.92	-9.63	13.19	0	0	-9.63	13.19	2.09	0.54	0	0	2.09	0.54	-7.54	12.78	0	0	-7.54	12.78	16.04	4.16	0
=>>	RECEPTOR
	Number	Residue	Residue Name	Residue ID	SINT		BINT		TINT		SVDW		BVDW		TVDW		SELE		BELE		TELE		SGAS		BGAS		TGAS		SGB		BGB		TGB		SGBSUR		BGBSUR		TGBSUR		SGBSOL		BGBSOL		TGBSOL		SGBTOT		BGBTOT
	0	1	ASP	233	5.3	1.71	3.81	0.78	9.12	2.07	-1.14	0.74	-0.26	0.5	-1.4	1.04	-62.91	7.66	-17.63	1.84	-80.54	7.9	-58.74	7.85	-14.08	1.82	-72.82	7.93	-58.45	7.47	-5.94	1.73	-64.39	7.45	0.97	0.07	0.11	0.04	1.09	0.08	-57.47	7.48	-5.83	1.75	-63.3	7.46	-116.22	2.12	-19.9
	1	2	LYS	234	11.02	2.52	10.74	1.45	21.76	3.17	-0.8	0.8	-0.14	0.65	-0.95	1.14	6.63	5.01	-2.27	1.33	4.36	5.28	16.85	5.6	8.33	1.66	25.17	5.86	-33.3	5.06	-6.02	1.21	-39.32	5.26	1.06	0.1	0.23	0.05	1.29	0.11	-32.24	5.04	-5.79	1.2	-38.03	5.24	-15.4	2.66	2.54
	2	3	TRP	235	10.87	2.18	10.28	1.4	21.15	2.71	-5.49	0.78	-0.78	0.76	-6.27	1.01	8.27	2.04	-17.19	1.35	-8.92	2.19	13.65	2.72	-7.68	1.62	5.96	3.52	-4.27	1.61	-1.84	0.78	-6.1	1.49	0.42	0.09	0.01	0.01	0.42	0.09	-3.85	1.59	-1.83	0.78	-5.68	1.48	9.79	2.2	-9.51
	3	4	GLU	236	6.43	1.68	10.14	1.37	16.57	2.35	-1.37	0.91	-0.79	0.8	-2.15	1.43	3.28	10.65	-4.22	1.87	-0.94	10.72	8.35	10.61	5.13	2.18	13.48	10.67	-66.53	10.39	-7.06	1.47	-73.6	10.44	0.49	0.16	0.11	0.04	0.6	0.16	-66.04	10.28	-6.96	1.46	-73	10.33	-57.7	1.69	-1.82
	4	5	MET	237	7.2	2.05	9.97	1.22	17.17	2.62	-6.14	0.72	-0.79	0.94	-6.93	1.24	-1.83	0.47	-6.2	1.81	-8.02	2.05	-0.76	2.18	2.99	2.53	2.22	3.52	1.48	0.37	-4.45	1.34	-2.97	1.49	0.03	0.02	0.05	0.02	0.08	0.03	1.51	0.36	-4.4	1.33	-2.89	1.47	0.75	2.19	-1.41
	5	6	GLU	238	6.21	2.11	10.36	1.46	16.57	2.62	-1.51	1.04	-1.37	0.83	-2.87	1.51	9.21	11	3.35	1.56	12.57	11.45	13.91	10.74	12.35	1.75	26.26	11.01	-71.9	9.95	-6.93	0.87	-78.83	10.05	0.56	0.14	0.01	0.02	0.57	0.15	-71.34	9.85	-6.91	0.86	-78.26	9.94	-57.43	2.82	5.44
	6	7	ARG	239	12.95	2.66	11.46	1.52	24.41	3.16	-2.82	1.09	-1.71	0.54	-4.53	1.26	-216.04	5.18	-4.5	1.27	-220.54	5.5	-205.91	5.34	5.25	1.72	-200.66	5.74	26.44	4.48	-4.7	0.97	21.74	4.62	0.68	0.07	0.07	0.03	0.75	0.07	27.12	4.47	-4.64	0.97	22.48	4.61	-178.79	2.59	0.61
	7	8	THR	240	6.6	1.26	10.52	1.29	17.12	1.79	-0.29	0.57	0.81	0.87	0.52	1.16	-21.58	1.85	-22.35	2.07	-43.93	2.64	-15.27	1.86	-11.01	2.03	-26.29	2.83	-2.55	1.21	-0.61	1.37	-3.15	1.68	0.67	0.07	0.11	0.03	0.78	0.07	-1.88	1.2	-0.5	1.34	-2.38	1.66	-17.15	1.55	-11.51
	8	9	ASP	241	4.34	1.54	10.56	1.43	14.9	2.32	-3.21	0.68	-1.69	0.94	-4.9	1.28	-9.5	6.17	-7.09	1.46	-16.59	6.73	-8.38	6.09	1.78	1.6	-6.59	6.28	-49.62	6.54	-4.37	0.83	-53.99	6.71	0.19	0.04	0.01	0.01	0.19	0.04	-49.44	6.52	-4.36	0.83	-53.79	6.7	-57.81	1.92	-2.58
	9	10	ILE	242	9.95	1.9	10.76	1.45	20.71	2.58	-4.58	0.92	-0.98	0.76	-5.56	1.34	-5.02	0.35	-5.6	1.34	-10.62	1.25	0.35	1.99	4.18	1.9	4.53	2.86	3.01	0.29	-5.51	0.92	-2.5	0.83	0	0	0.02	0.02	0.02	0.02	3.01	0.29	-5.49	0.91	-2.48	0.82	3.36	1.9	-1.31
	10	11	THR	243	6.81	1.5	10.97	1.41	17.78	2.18	-1.2	0.54	-0.75	0.79	-1.96	0.92	-23.93	2.22	-11.9	1.03	-35.84	2.56	-18.33	2.64	-1.69	1.55	-20.02	3.1	-0.25	1.58	-3.43	0.45	-3.68	1.56	0.39	0.05	0.03	0.01	0.41	0.05	0.14	1.57	-3.41	0.45	-3.26	1.56	-18.19	1.72	-5.09
	11	12	MET	244	7.32	1.89	10.21	1.29	17.53	2.5	-4.93	0.73	-1.03	0.7	-5.97	1.06	0.21	0.56	2.53	0.83	2.74	0.94	2.59	2.13	11.7	1.66	14.3	2.78	-0.16	0.57	-5.56	0.68	-5.72	0.81	0.24	0.04	0.17	0.02	0.42	0.04	0.08	0.58	-5.38	0.68	-5.3	0.81	2.68	2.05	6.32
	12	13	LYS	245	10.85	2.43	12.59	1.4	23.45	3.12	-1.99	1.14	-0.53	0.72	-2.52	1.47	-42.02	8.61	-3.91	0.93	-45.93	8.37	-33.16	8.75	8.16	1.46	-25.01	8.58	13.44	7.42	-5.06	0.83	8.37	7.09	0.62	0.07	0.26	0.04	0.88	0.07	14.05	7.38	-4.8	0.8	9.25	7.05	-19.11	2.73	3.36
	13	14	HIS	246	24.76	1.55	10.03	1.26	34.79	2.28	-3.64	0.68	-0.69	0.64	-4.33	1.05	-15.88	1.68	-4.28	0.93	-20.16	1.78	5.24	2.13	5.06	1.51	10.3	2.65	-0.75	1.23	-5	0.6	-5.75	1.23	0.54	0.05	0.06	0.02	0.61	0.06	-0.21	1.23	-4.94	0.59	-5.14	1.21	5.03	1.72	0.12
	14	15	LYS	247	11.19	2.5	10.3	1.32	21.48	2.87	-2.8	0.64	-1.92	0.68	-4.72	0.86	-21.42	6.11	-4.55	1.36	-25.97	5.95	-13.04	6.78	3.83	1.87	-9.21	6.87	-5.47	5.94	-3	0.81	-8.47	5.77	0.68	0.06	0.03	0.01	0.71	0.05	-4.79	5.93	-2.97	0.81	-7.76	5.76	-17.83	2.75	0.86
	15	16	LEU	248	8.66	1.79	9.68	1.17	18.34	2.2	-3.72	0.97	-2.35	0.87	-6.07	1.4	-26.89	0.38	-7.93	1.25	-34.82	1.3	-21.95	2.07	-0.59	1.71	-22.54	2.79	3.41	0.23	-4.07	0.6	-0.65	0.61	0.01	0.01	0	0	0.01	0.01	3.42	0.22	-4.07	0.6	-0.65	0.62	-18.53	2.02	-4.66
	16	17	GLY	249	0	0	7.99	1.35	7.99	1.35	0	0	-2.25	0.64	-2.25	0.64	0	0	-5.23	0.84	-5.23	0.84	0	0	0.51	1.56	0.51	1.56	0	0	-7.04	0.8	-7.04	0.8	0	0	0.22	0.05	0.22	0.05	0	0	-6.83	0.8	-6.83	0.8	0	0	-6.32
	17	18	GLY	250	0	0	8.26	1.56	8.26	1.56	0	0	-0.52	0.69	-0.52	0.69	0	0	-3.69	2.1	-3.69	2.1	0	0	4.06	2.81	4.06	2.81	0	0	-8.65	1.54	-8.65	1.54	0	0	0.5	0.05	0.5	0.05	0	0	-8.15	1.54	-8.15	1.54	0	0	-4.09
	18	19	GLY	251	0	0	9.62	1.37	9.62	1.37	0	0	-1.33	0.61	-1.33	0.61	0	0	-6.17	1.13	-6.17	1.13	0	0	2.12	1.67	2.12	1.67	0	0	-6.27	1.33	-6.27	1.33	0	0	0.36	0.04	0.36	0.04	0	0	-5.9	1.31	-5.9	1.31	0	0	-3.79
	19	20	GLN	252	12.95	2.02	10.1	1.55	23.04	2.65	-2.93	1.07	-0.28	0.63	-3.21	1.33	-76.43	1.93	-4.25	0.93	-80.67	2.28	-66.41	2.34	5.57	1.75	-60.84	2.99	1.96	1.46	-6.66	0.67	-4.7	1.83	0.23	0.04	0.26	0.03	0.49	0.05	2.19	1.44	-6.41	0.67	-4.22	1.8	-64.22	1.87	-0.84
	20	21	TYR	253	8.63	1.98	8.66	1.36	17.29	2.43	-4.51	0.88	-0.99	0.82	-5.5	1.31	-18.67	1.09	-2.87	0.92	-21.53	1.53	-14.55	2.05	4.81	1.7	-9.74	2.79	-1.84	0.46	-4.17	0.81	-6.01	1	0.06	0.02	0.05	0.03	0.11	0.03	-1.78	0.46	-4.12	0.8	-5.9	0.99	-16.33	2.04	0.69
	21	22	GLY	254	0	0	9.79	1.23	9.79	1.23	0	0	-1.55	0.62	-1.55	0.62	0	0	-10.76	2.1	-10.76	2.1	0	0	-2.52	2.24	-2.52	2.24	0	0	-2.13	1.57	-2.13	1.57	0	0	0.3	0.06	0.3	0.06	0	0	-1.83	1.57	-1.83	1.57	0	0	-4.35
	22	23	GLU	255	6.37	1.84	10.13	1.52	16.49	2.47	-0.69	1.13	-0.69	0.75	-1.38	1.46	-2.42	13.39	-0.51	1.35	-2.93	13.61	3.25	13.56	8.92	1.84	12.18	14.01	-61.45	11.95	-8.24	1.01	-69.69	12.3	0.26	0.09	0.01	0.01	0.27	0.1	-61.19	11.89	-8.23	1.01	-69.43	12.24	-57.94	2.36	0.69
	23	24	VAL	256	5.84	1.72	9.64	1.16	15.49	2.16	-2.88	0.77	-1.02	0.81	-3.9	1.13	-19.66	0.44	-9.44	1	-29.11	0.9	-16.7	1.81	-0.82	1.48	-17.52	2.31	4.54	0.33	-4.48	0.55	0.07	0.39	0.02	0.02	0	0	0.02	0.02	4.56	0.33	-4.48	0.55	0.08	0.39	-12.13	1.79	-5.3
	24	25	TYR	257	8.49	1.9	10.68	1.23	19.17	2.26	-4.28	0.62	-2.62	0.65	-6.91	0.91	-16.47	1.34	-11.29	0.78	-27.76	1.55	-12.26	2.36	-3.23	1.3	-15.49	2.66	-4.65	0.98	-2.59	0.38	-7.23	1.01	0.36	0.07	0	0	0.36	0.07	-4.29	0.96	-2.59	0.38	-6.88	1	-16.55	2.06	-5.82
	25	26	GLU	258	6.04	1.7	9.48	1	15.52	2.08	-3.11	1.19	-2.15	0.83	-5.25	1.45	-3.44	7.8	-8.14	1.2	-11.57	7.87	-0.5	7.26	-0.81	1.71	-1.31	7.26	-57.17	6.95	-3.09	0.66	-60.25	6.95	0.12	0.04	0	0	0.12	0.04	-57.05	6.93	-3.09	0.66	-60.14	6.93	-57.55	2.1	-3.89
	26	27	GLY	259	0	0	8.49	1.51	8.49	1.51	0	0	-3.32	0.98	-3.32	0.98	0	0	-7.96	1.06	-7.96	1.06	0	0	-2.79	1.69	-2.79	1.69	0	0	-2.62	0.66	-2.62	0.66	0	0	0	0	0	0	0	0	-2.62	0.66	-2.62	0.66	0	0	-5.41
	27	28	VAL	260	6.15	1.69	10.04	1.31	16.19	2.37	-2	0.7	-1.63	0.79	-3.63	1.09	-18.3	0.45	-10.51	1.07	-28.81	1.02	-14.15	1.75	-2.1	1.64	-16.25	2.48	2.95	0.34	-3.69	0.67	-0.73	0.58	0.26	0.04	0	0	0.26	0.04	3.21	0.35	-3.69	0.67	-0.47	0.58	-10.94	1.7	-5.78
	28	29	TRP	261	11.52	2.58	11.43	1.13	22.95	3.03	-6.36	0.93	-2.98	0.82	-9.35	1.32	5.97	1.83	-5.64	1.09	0.33	2.1	11.13	3.43	2.81	1.49	13.93	3.77	-0.69	1.17	-0.71	0.43	-1.4	1.25	0.31	0.07	0	0	0.31	0.07	-0.38	1.15	-0.71	0.43	-1.09	1.23	10.75	2.91	2.1
	29	30	LYS	262	11.03	2.38	12.48	1.68	23.51	2.9	-2.24	1.08	-1.37	0.87	-3.61	1.32	-30.97	6.85	-0.67	1.25	-31.64	6.98	-22.17	6.97	10.44	1.78	-11.74	7.3	4.41	6.6	-3.56	0.88	0.85	6.72	0.68	0.06	0.11	0.02	0.79	0.06	5.08	6.56	-3.45	0.87	1.64	6.68	-17.09	2.53	6.99
	30	31	LYS	263	11.13	2.48	11.41	1.52	22.55	2.8	-2.23	0.79	-0.27	0.69	-2.5	1.16	-15.94	8.1	-9.99	1.45	-25.94	8.1	-7.04	7.95	1.15	1.68	-5.89	8	-11.01	7.9	-4.28	0.79	-15.3	7.74	0.77	0.1	0.24	0.02	1.02	0.1	-10.24	7.87	-4.04	0.79	-14.28	7.71	-17.28	2.46	-2.89
	31	32	TYR	264	8.52	1.94	9.56	1.34	18.08	2.53	-0.18	0.65	0.23	0.84	0.04	1.11	-17.99	0.83	-9.11	0.81	-27.1	1.17	-9.66	1.99	0.68	1.51	-8.98	2.61	-4.57	0.71	-5.55	0.65	-10.12	0.95	0.86	0.06	0.19	0.03	1.05	0.07	-3.71	0.68	-5.36	0.64	-9.07	0.91	-13.36	2.02	-4.68
	32	33	SER	265	3.36	1.01	10.62	1.32	13.98	1.81	-0.17	0.43	-0.16	0.74	-0.34	0.98	-2.75	0.93	-4.27	1.59	-7.03	1.98	0.43	1.41	6.18	1.96	6.62	2.67	-2.81	0.91	-6.88	1	-9.68	1.44	0.54	0.04	0.16	0.04	0.7	0.06	-2.26	0.9	-6.72	0.98	-8.98	1.42	-1.83	1.08	-0.53
	33	34	LEU	266	9.07	2.15	10.55	1.35	19.62	2.44	-0.9	0.85	-0.61	0.87	-1.52	1.3	-26.16	0.4	-6.02	1.03	-32.17	1.17	-17.99	2.28	3.92	1.55	-14.07	2.65	2.21	0.29	-3.39	0.39	-1.18	0.45	0.59	0.06	0.03	0.02	0.62	0.05	2.8	0.27	-3.36	0.39	-0.56	0.44	-15.19	2.28	0.56
	34	35	THR	267	6.57	1.54	10.28	1.25	16.85	2.31	-2.24	0.43	-1.43	0.65	-3.67	0.81	-23.34	1.19	-8.32	0.65	-31.65	1.42	-19.01	1.78	0.53	1.46	-18.48	2.62	-0.47	0.74	-5.18	0.5	-5.65	0.83	0.31	0.04	0.06	0.03	0.36	0.05	-0.16	0.73	-5.12	0.49	-5.29	0.82	-19.17	1.54	-4.59
	35	36	VAL	268	5.91	1.96	9.82	1.25	15.73	2.48	-3.98	0.72	-1.12	0.98	-5.11	1.32	-19.74	0.37	-9.25	1.07	-28.99	1.11	-17.82	2.07	-0.56	1.63	-18.37	2.72	4.46	0.27	-5.04	0.5	-0.59	0.46	0	0	0	0	0	0	4.46	0.27	-5.04	0.5	-0.59	0.46	-13.36	2.07	-5.6
	36	37	ALA	269	2.7	0.89	9.97	1.44	12.67	1.93	-2.03	0.4	-2.22	0.86	-4.25	0.92	2.18	0.12	-7.65	0.77	-5.47	0.77	2.85	1.05	0.1	1.45	2.95	1.96	-0.13	0.05	-0.4	0.31	-0.52	0.32	0	0	0	0	0	0	-0.12	0.05	-0.4	0.31	-0.52	0.32	2.73	1.04	-0.3
	37	38	VAL	270	6.02	1.48	10.63	1.42	16.64	2.22	-3.98	0.74	-1.89	0.83	-5.88	1.16	-19.76	0.38	-3.62	0.96	-23.38	0.98	-17.73	1.68	5.11	1.42	-12.62	2.36	4.28	0.27	-4.76	0.45	-0.47	0.37	0	0	0	0	0	0	4.28	0.27	-4.76	0.45	-0.47	0.37	-13.44	1.67	0.35
	38	39	LYS	271	11.56	2.44	10.72	1.33	22.28	2.58	-3.37	1.2	-1.76	0.93	-5.14	1.47	-90.09	8.64	-9	0.98	-99.09	8.88	-81.9	9.01	-0.05	1.58	-81.95	9.31	61.14	7.26	-1.56	0.44	59.58	7.39	0.1	0.03	0	0	0.1	0.03	61.23	7.26	-1.56	0.44	59.68	7.39	-20.67	3.03	-1.61
	39	40	THR	272	6.19	1.42	10.53	1.34	16.72	2.03	-3.16	0.73	-2.01	0.71	-5.17	1.15	-23.51	0.71	-9.9	1.32	-33.42	1.58	-20.49	1.56	-1.38	1.87	-21.87	2.45	-0.74	0.47	-6.22	1.34	-6.95	1.54	0.04	0.02	0.02	0.02	0.06	0.02	-0.7	0.47	-6.2	1.33	-6.9	1.54	-21.18	1.51	-7.58
	40	41	LEU	273	9.11	1.83	10.86	1.4	19.97	2.65	-2.89	1.07	-0.53	0.85	-3.42	1.47	-28.56	0.43	7.13	1.27	-21.42	1.21	-22.33	2.23	17.46	1.83	-4.87	3.23	4.36	0.31	-9.41	1.06	-5.05	0.9	0.16	0.05	0.04	0.02	0.2	0.06	4.52	0.31	-9.38	1.05	-4.86	0.89	-17.81	2.23	8.09
	41	42	LYS	274	11.87	2.5	14	1.84	25.88	3.24	-0.94	0.97	-0.7	0.72	-1.65	1.27	-47.8	16	-10.03	0.84	-57.83	15.84	-36.87	15.9	3.27	1.86	-33.6	15.78	19.64	14.86	-4.31	0.74	15.34	14.57	0.81	0.14	0.16	0.03	0.97	0.13	20.45	14.8	-4.15	0.71	16.3	14.53	-16.42	2.91	-0.88
	42	43	GLU	275	5.81	1.84	9.71	1.4	15.52	2.37	-0.76	0.68	0.08	0.9	-0.68	1.25	37.4	11.79	-9	1.35	28.41	12.05	42.46	11.65	0.79	1.92	43.25	12.17	-101.05	11.02	-9.71	0.93	-110.76	11.27	0.77	0.09	0.05	0.01	0.81	0.08	-100.28	10.94	-9.66	0.93	-109.94	11.2	-57.82	1.85	-8.87
	43	44	ASP	276	4.46	1.11	10.38	1.21	14.84	1.78	-1.09	0.44	-0.39	0.63	-1.47	0.92	33.97	2.61	7.33	1.93	41.3	3.86	37.35	2.86	17.32	2.31	54.67	4.37	-99.11	2.83	-19.35	1.43	-118.46	3.76	0.65	0.06	0.17	0.03	0.82	0.06	-98.46	2.82	-19.17	1.45	-117.63	3.77	-61.11	0.94	-1.85
	44	45	THR	277	6.13	1.63	10.59	1.24	16.72	2.26	-1.77	0.74	-0.33	0.72	-2.1	1.08	-25.53	1.2	-4.13	1.26	-29.66	1.82	-21.17	1.76	6.14	1.79	-15.04	2.48	1.29	0.62	-8.25	1.14	-6.96	1.29	0.2	0.05	0.11	0.04	0.31	0.05	1.49	0.63	-8.14	1.13	-6.66	1.26	-19.69	1.71	-2.01
	45	46	MET	278	7.4	2.24	11.07	1.41	18.47	2.87	-0.66	0.5	-0.06	0.68	-0.72	0.95	-2.64	1.09	-5.13	1.8	-7.77	2.51	4.09	2.67	5.88	2.34	9.97	4.2	1.48	1	-6.98	1.75	-5.5	2.38	1.15	0.06	0.2	0.05	1.35	0.08	2.64	0.98	-6.78	1.72	-4.14	2.33	6.73	2.37	-0.9
	46	47	GLU	279	6.39	2.01	10.9	1.4	17.28	2.67	-0.53	0.71	-0.18	0.71	-0.71	1.13	46.62	6.68	3.98	3.09	50.6	9.09	52.47	6.43	14.7	3.39	67.17	8.84	-108.98	7.23	-12.93	2.16	-121.91	8.82	0.84	0.1	0.08	0.04	0.91	0.13	-108.14	7.22	-12.85	2.13	-121	8.79	-55.67	2.14	1.85
	47	48	VAL	280	6.24	1.54	11.14	1.54	17.38	2.14	-1.29	0.65	0.02	1.03	-1.27	1.31	-22.03	0.64	-9.79	1.72	-31.82	1.72	-17.09	1.65	1.38	2.13	-15.71	2.52	6.73	0.52	-7.76	1.05	-1.03	0.97	0.28	0.08	0.01	0.01	0.29	0.07	7.01	0.53	-7.75	1.04	-0.74	0.95	-10.07	1.53	-6.37
	48	49	GLU	281	5.92	1.6	11.01	1.38	16.93	2.25	-0.75	0.69	-0.42	0.9	-1.17	1.23	31.34	7.85	-5.63	1.92	25.7	8.55	36.51	8.01	4.96	2.13	41.47	8.67	-94.5	7.61	-8.29	1.47	-102.78	8.03	0.82	0.1	0.03	0.02	0.86	0.1	-93.67	7.57	-8.26	1.47	-101.93	7.99	-57.16	1.8	-3.3
	49	50	GLU	282	6.27	1.64	10.55	1.38	16.82	2.33	-0.73	0.83	-0.42	0.76	-1.15	1.21	32.7	13.32	1.67	1.48	34.37	13.86	38.24	13.43	11.8	1.85	50.04	14.01	-95.67	12.9	-12.91	1.39	-108.58	13.37	0.81	0.16	0.17	0.06	0.98	0.18	-94.86	12.8	-12.75	1.36	-107.6	13.24	-56.62	1.72	-0.95
	50	51	PHE	283	8	1.94	11.44	1.32	19.45	2.48	-4.39	0.75	-1.54	0.69	-5.93	1.16	1.41	0.37	-2.09	1.66	-0.69	1.81	5.02	2.32	7.81	2.3	12.83	3.29	-0.77	0.31	-5.34	1.21	-6.11	1.31	0.15	0.05	0.06	0.03	0.21	0.06	-0.61	0.33	-5.28	1.22	-5.89	1.33	4.41	2.26	2.53
	51	52	LEU	284	9.35	2.06	11.52	1.45	20.86	2.81	-1.61	0.79	-1.09	0.8	-2.7	1.14	-27.51	0.7	-0.16	1.01	-27.68	1.18	-19.78	2.28	10.27	1.62	-9.51	2.76	3.48	0.6	-3.31	0.7	0.16	0.82	0.33	0.07	0.02	0.01	0.34	0.07	3.8	0.6	-3.3	0.7	0.51	0.83	-15.98	2.24	6.97
	52	53	LYS	285	11.5	2.11	11.37	1.76	22.87	3.05	-0.82	1.1	-0.39	0.75	-1.22	1.41	-59.25	16.73	-13.47	1.6	-72.72	16.48	-48.58	16.62	-2.5	1.84	-51.07	16.23	30.68	15.27	-0.51	1.02	30.17	14.98	0.92	0.09	0.05	0.02	0.97	0.1	31.6	15.19	-0.46	1.01	31.14	14.9	-16.97	2.74	-2.96
	53	54	GLU	286	5.92	1.68	10.82	1.21	16.73	2.32	-2.38	0.98	-0.83	0.84	-3.21	1.27	22.05	5.22	-12.05	1.3	9.99	5.26	25.58	5.42	-2.06	1.75	23.52	5.79	-81.72	5.05	-5.54	0.92	-87.26	5.19	0.27	0.05	0.04	0.02	0.31	0.05	-81.45	5.05	-5.51	0.92	-86.96	5.18	-55.87	1.85	-7.57
	54	55	ALA	287	2.87	0.89	10.91	1.5	13.77	1.86	-1.74	0.28	-2.07	0.82	-3.81	0.91	2.27	0.16	-9.21	1.63	-6.94	1.66	3.39	0.97	-0.37	2.27	3.02	2.57	-0.34	0.1	0.72	1.09	0.38	1.11	0.04	0.02	0	0	0.04	0.02	-0.3	0.11	0.72	1.09	0.41	1.11	3.09	0.94	0.34
	55	56	ALA	288	2.8	0.8	10.94	1.5	13.74	1.74	-0.72	0.26	-1.7	0.67	-2.42	0.76	2.1	0.12	-4.5	1.58	-2.4	1.61	4.18	0.82	4.74	1.62	8.92	1.91	-0.11	0.08	-2.26	1.35	-2.37	1.36	0.39	0.04	0.07	0.04	0.46	0.05	0.28	0.09	-2.19	1.34	-1.91	1.35	4.46	0.82	2.55
	56	57	VAL	289	6.19	1.67	11.43	1.52	17.63	2.39	-0.97	0.64	-0.33	1.02	-1.3	1.27	-20.48	0.69	-8.66	1.35	-29.14	1.11	-15.26	1.92	2.45	1.59	-12.81	2.36	5.41	0.64	-5.4	0.78	0	0.57	0.36	0.06	0.02	0.01	0.38	0.06	5.76	0.65	-5.38	0.78	0.38	0.56	-9.49	1.75	-2.94
	57	58	MET	290	7.95	1.98	10.77	1.34	18.72	2.41	-5.32	0.66	-1.86	0.78	-7.19	1.11	-1.51	1.06	-2.03	1.17	-3.53	1.66	1.12	2.32	6.88	1.77	8	3.21	1.35	0.92	-3.87	0.74	-2.53	1.26	0.15	0.04	0.01	0.01	0.17	0.04	1.5	0.92	-3.86	0.74	-2.36	1.25	2.62	2.15	3.02
	58	59	LYS	291	10.77	2.25	10.54	1.36	21.31	2.86	-3.1	0.74	-0.56	0.81	-3.66	1.23	-19.18	5.77	-9.62	1.19	-28.8	5.54	-11.51	5.89	0.36	1.54	-11.15	5.84	-6.08	5.78	-3.31	0.78	-9.4	5.6	0.55	0.06	0.2	0.05	0.75	0.08	-5.53	5.76	-3.11	0.78	-8.64	5.58	-17.04	2.19	-2.75
	59	60	GLU	292	6.37	1.53	10.7	1.4	17.07	2.33	-1.14	0.76	-0.42	0.97	-1.56	1.29	7.73	7.16	-11.47	2.1	-3.74	8.04	12.96	6.93	-1.18	2.51	11.77	7.98	-71.62	6.69	-4.38	1.66	-75.99	7.4	0.73	0.08	0.1	0.04	0.83	0.11	-70.89	6.65	-4.28	1.64	-75.16	7.33	-57.93	1.54	-5.46
	60	61	ILE	293	9.26	2.02	10.71	1.3	19.96	2.39	-1.94	1.03	-0.21	0.76	-2.15	1.4	-6.25	0.53	6.12	0.96	-0.13	0.94	1.07	2.33	16.61	1.47	17.68	2.38	4.14	0.46	-9.19	0.61	-5.05	0.59	0.06	0.04	0.01	0.01	0.07	0.04	4.2	0.45	-9.18	0.61	-4.98	0.57	5.27	2.2	7.43
	61	62	LYS	294	10.74	2.53	10.38	1.32	21.13	3.13	-1.34	0.8	-1.2	0.6	-2.54	1.06	-14.92	7.34	-0.79	0.75	-15.7	7.31	-5.52	7.75	8.4	1.64	2.88	8.08	-10.85	7.33	-4.16	0.55	-15.01	7.23	0.77	0.1	0.07	0.02	0.84	0.1	-10.08	7.32	-4.09	0.54	-14.17	7.21	-15.6	2.95	4.31
	62	63	HIS	295	24.62	1.76	11.08	1.25	35.7	2.29	-6.64	0.77	-0.52	0.72	-7.16	1.1	-13.35	1.41	0.17	0.94	-13.18	1.85	4.62	2.21	10.73	1.32	15.35	2.76	-1.58	1.21	-4.93	0.72	-6.51	1.48	0.2	0.03	0.02	0.01	0.23	0.03	-1.38	1.2	-4.91	0.71	-6.28	1.47	3.24	1.86	5.82
	63	64	PRO	296	12.15	1.59	13.98	1.41	26.13	2.54	-1.01	0.45	-1.23	0.61	-2.23	0.75	-7.13	0.94	-2.79	1.46	-9.92	1.17	4.01	1.85	9.97	1.68	13.98	2.73	6.48	0.89	-8.49	1.1	-2.01	0.77	0.68	0.03	0.08	0.03	0.77	0.03	7.17	0.9	-8.41	1.1	-1.24	0.76	11.18	1.64	1.56
	64	65	ASN	297	11.78	1.74	10.55	1.71	22.33	2.76	-4.03	0.68	-1.67	0.82	-5.7	1.15	-81.91	2.16	-7.31	1.02	-89.22	2.51	-74.15	2.38	1.57	1.48	-72.58	2.92	-3.7	1.38	-1.35	0.33	-5.05	1.38	0.16	0.03	0	0	0.16	0.03	-3.54	1.37	-1.35	0.33	-4.89	1.37	-77.69	1.65	0.21
	65	66	LEU	298	9.01	2.05	10.72	1.3	19.73	2.66	-2.75	0.93	-2.38	0.75	-5.13	1.2	-27.91	0.43	-1.2	0.97	-29.11	0.98	-21.64	2.14	7.14	1.55	-14.51	2.7	3.94	0.28	-4.62	0.56	-0.68	0.52	0.17	0.04	0	0	0.17	0.04	4.12	0.29	-4.62	0.56	-0.5	0.52	-17.53	2.13	2.52
	66	67	VAL	299	6.69	1.85	10.63	1.31	17.32	2.34	-2.68	0.79	-1.04	0.83	-3.71	1.28	-21.67	0.54	-6.42	1.33	-28.1	1.21	-17.66	1.89	3.17	1.62	-14.5	2.47	6.49	0.4	-9.65	0.88	-3.17	0.64	0.02	0.01	0.02	0.01	0.04	0.02	6.51	0.4	-9.63	0.88	-3.12	0.64	-11.15	1.84	-6.46
	67	68	GLN	300	14.1	2.06	10.96	1.27	25.06	2.32	-2.92	0.91	-2.4	0.67	-5.32	1.15	-74.15	5.57	-3.7	1.16	-77.86	5.81	-62.97	5.19	4.86	1.38	-58.11	5.16	-0.27	4.29	-4.77	0.61	-5.04	4.41	0.33	0.05	0.01	0.01	0.34	0.06	0.06	4.27	-4.77	0.61	-4.71	4.38	-62.91	2	0.09
	68	69	LEU	301	9.07	1.93	10.75	1.38	19.82	2.47	-4.21	0.93	-2.29	0.66	-6.51	1.1	-26.35	0.47	-0.83	1.52	-27.17	1.4	-21.49	2.13	7.63	2.16	-13.86	2.95	2.44	0.4	-3.7	1.14	-1.26	0.92	0	0	0.02	0.02	0.03	0.02	2.45	0.4	-3.68	1.13	-1.24	0.91	-19.05	2.12	3.95
	69	70	LEU	302	8.17	1.92	10.59	1.24	18.76	2.36	-3.19	0.83	-1.62	0.68	-4.81	1.11	-26.09	0.44	-3.68	0.99	-29.78	1.02	-21.11	2.06	5.29	1.3	-15.82	2.33	2.63	0.3	-4.94	0.76	-2.31	0.68	0.21	0.04	0.07	0.02	0.28	0.05	2.84	0.29	-4.87	0.76	-2.03	0.67	-18.27	2.04	0.42
	70	71	GLY	303	0	0	8.05	1.33	8.05	1.33	0	0	-3.68	0.83	-3.68	0.83	0	0	-11.1	0.97	-11.1	0.97	0	0	-6.73	1.38	-6.73	1.38	0	0	-1.08	0.4	-1.08	0.4	0	0	0	0	0	0	0	0	-1.08	0.4	-1.08	0.4	0	0	-7.8
	71	72	VAL	304	5.96	1.67	9.62	1.37	15.58	2.39	-2.35	0.7	-1.76	0.76	-4.11	1.2	-19.58	0.47	-9.44	1.18	-29.02	1.32	-15.97	1.8	-1.58	1.59	-17.55	2.57	4.09	0.39	-5.15	0.57	-1.06	0.59	0.12	0.03	0	0	0.12	0.03	4.21	0.39	-5.15	0.57	-0.95	0.58	-11.76	1.73	-6.74
	72	73	CYS	305	3.26	1.1	10.26	1.04	13.52	1.66	-3.52	0.59	-2.4	0.7	-5.92	1.01	5.97	0.82	-7.42	1.21	-1.44	1.51	5.72	1.33	0.45	1.56	6.17	2.19	-1.12	0.5	-1.43	0.62	-2.55	0.84	0.01	0.01	0	0	0.01	0.01	-1.12	0.5	-1.43	0.62	-2.54	0.84	4.6	1.21	-0.98
	73	74	THR	306	6.33	1.53	10.51	1.34	16.83	2.17	-1.47	0.64	-0.29	0.64	-1.76	1.1	-24	1.38	1.54	1.09	-22.45	1.91	-19.14	2.04	11.76	1.54	-7.38	2.82	-0.48	0.82	-8.37	0.81	-8.84	1.29	0.26	0.06	0.08	0.02	0.34	0.07	-0.22	0.82	-8.28	0.8	-8.5	1.27	-19.36	1.75	3.48
	74	75	ARG	307	13.16	2.78	10.44	1.39	23.6	3.12	-0.5	1.01	0.4	0.58	-0.09	1.12	-215.31	9.55	-4.1	1.09	-219.42	9.38	-202.65	9.93	6.74	1.52	-195.91	9.83	25.6	7.93	-7.91	0.74	17.69	7.76	1.07	0.16	0.25	0.03	1.33	0.16	26.67	7.83	-7.66	0.74	19.01	7.66	-175.98	3.26	-0.92
	75	76	GLU	308	6	1.62	10.88	1.35	16.88	2.34	-0.85	1.01	0.32	0.75	-0.53	1.26	-1.03	5.97	1.11	0.96	0.09	6.05	4.13	6.01	12.31	1.63	16.44	6.51	-63.06	5.87	-7.93	0.79	-70.99	5.84	0.48	0.09	0.03	0.01	0.51	0.09	-62.57	5.81	-7.91	0.79	-70.48	5.79	-58.45	1.65	4.4
	76	77	PRO	309	12.22	1.44	14.24	1.31	26.47	2.06	-2	0.47	-0.22	0.76	-2.23	0.89	-12.03	0.87	13.5	1.46	1.47	1.12	-1.81	1.66	27.52	1.97	25.71	2.55	11.52	0.85	-13.74	1.46	-2.22	1.05	0.39	0.05	0.05	0.02	0.44	0.05	11.91	0.83	-13.69	1.45	-1.78	1.04	10.1	1.53	13.83
	77	78	PRO	310	12.51	1.48	13.37	1.31	25.87	2.22	-2.91	0.55	-2.32	0.78	-5.23	0.89	-8.77	1.02	5.26	1.2	-3.51	0.82	0.82	1.86	16.31	1.64	17.14	2.42	8.05	0.97	-11.73	1.05	-3.68	0.66	0.23	0.04	0	0	0.23	0.04	8.29	0.97	-11.73	1.05	-3.45	0.65	9.11	1.58	4.58
	78	79	PHE	311	9.15	1.99	9.79	1.16	18.95	2.46	-2.71	0.61	-2.14	0.85	-4.85	1.1	0.4	0.47	-8.24	0.86	-7.84	0.95	6.85	2.21	-0.59	1.4	6.26	2.79	-0.52	0.33	-1.93	0.38	-2.45	0.48	0.25	0.04	0	0	0.25	0.04	-0.27	0.32	-1.93	0.38	-2.2	0.47	6.58	2.19	-2.52
	79	80	TYR	312	9.83	2.06	11.18	1.55	21.01	2.77	-4.94	0.78	-3.14	0.81	-8.07	1.12	-17.24	0.65	-6.71	1.05	-23.95	1.26	-12.35	2.42	1.34	1.48	-11.01	2.85	-2.84	0.49	-1.7	0.36	-4.54	0.61	0.12	0.03	0	0	0.12	0.03	-2.72	0.49	-1.7	0.36	-4.43	0.61	-15.08	2.27	-0.37
	80	81	ILE	313	9.71	2.08	11.35	1.4	21.06	2.65	-3.85	0.92	-1.96	0.89	-5.8	1.4	-6.17	0.46	-5.55	0.94	-11.73	0.93	-0.31	1.96	3.83	1.58	3.53	2.42	4.27	0.41	-4.69	0.41	-0.42	0.27	0	0	0	0	0	0	4.27	0.41	-4.69	0.41	-0.42	0.27	3.97	1.98	-0.86
	81	82	ILE	314	10.68	2.2	10.48	1.29	21.16	2.66	-4.99	0.98	-1.69	0.98	-6.69	1.49	-5.52	0.28	-9.19	1.07	-14.71	1.05	0.16	2.33	-0.4	1.63	-0.24	3	3.53	0.24	-3.48	0.46	0.05	0.37	0	0	0	0	0	0	3.53	0.24	-3.48	0.46	0.05	0.37	3.69	2.32	-3.88
	82	83	ILE	315	9.72	2.49	10.13	1.2	19.85	2.74	-3.5	1.19	-1.31	1	-4.81	1.69	-6.68	0.38	-11.23	0.83	-17.91	0.85	-0.46	2.58	-2.41	1.3	-2.87	2.84	4.53	0.36	-3.82	0.39	0.71	0.45	0.03	0.02	0	0	0.03	0.02	4.56	0.37	-3.82	0.39	0.74	0.46	4.1	2.6	-6.24
	83	84	GLU	316	6.21	1.96	9.99	1.11	16.2	2.41	-3.08	0.98	-2.26	0.74	-5.34	1.25	-7.77	5.79	1.07	0.79	-6.7	5.91	-4.64	5.88	8.8	1.19	4.16	5.92	-53.49	4.85	-10.25	0.67	-63.73	5	0.16	0.02	0.01	0	0.17	0.02	-53.33	4.84	-10.24	0.67	-63.57	4.99	-57.96	2.12	-1.44
	84	85	PHE	317	8.23	1.97	9.83	1.15	18.06	2.37	-2.82	0.59	-1.94	0.63	-4.76	0.87	0.5	0.43	-1.14	0.99	-0.64	1.01	5.91	2.12	6.76	1.43	12.67	2.72	-0.77	0.26	-6.03	0.75	-6.81	0.77	0.3	0.05	0.13	0.02	0.43	0.05	-0.47	0.25	-5.9	0.75	-6.38	0.77	5.44	2.16	0.85
	85	86	MET	318	7.04	1.57	11.23	1.23	18.27	2.04	-6.11	0.86	-2.3	0.66	-8.41	1.18	-2.68	0.62	-2.93	0.7	-5.61	1	-1.74	1.93	5.99	1.4	4.25	2.31	2.75	0.52	-5.39	0.54	-2.64	0.71	0.03	0.02	0.02	0.01	0.05	0.02	2.78	0.51	-5.37	0.53	-2.59	0.7	1.03	1.82	0.62
	86	87	THR	319	6.59	1.43	12.85	1.77	19.43	2.4	-0.81	0.83	-0.89	0.66	-1.7	1.16	-32.59	1.71	-7.86	0.87	-40.45	1.95	-26.81	2.08	4.09	1.48	-22.72	2.66	5.02	0.72	-8.49	0.63	-3.47	0.93	0.28	0.03	0.17	0.02	0.46	0.04	5.31	0.73	-8.32	0.62	-3.01	0.93	-21.5	1.75	-4.23
	87	88	TYR	320	9.26	2.18	9.43	1.54	18.69	2.8	-0.77	0.84	-0.64	0.77	-1.41	1.19	-17.64	0.89	-2.96	0.91	-20.6	1.31	-9.15	2.57	5.83	1.58	-3.32	3.28	-4.29	0.71	-6.86	0.55	-11.15	0.94	0.75	0.06	0.11	0.03	0.86	0.05	-3.54	0.7	-6.75	0.55	-10.29	0.93	-12.69	2.47	-0.92
	88	89	GLY	321	0	0	8.03	1.27	8.03	1.27	0	0	-2.63	0.67	-2.63	0.67	0	0	-9.08	0.94	-9.08	0.94	0	0	-3.68	1.37	-3.68	1.37	0	0	-2.58	0.68	-2.58	0.68	0	0	0.01	0.01	0.01	0.01	0	0	-2.57	0.67	-2.57	0.67	0	0	-6.25
	89	90	ASN	322	12.23	1.92	10.4	1.4	22.63	2.58	-3.67	1.12	-2.86	0.8	-6.53	1.4	-85.77	3.01	-4.62	0.98	-90.4	3.3	-77.21	2.77	2.92	1.59	-74.3	3.6	-1.73	1.39	-3.44	0.66	-5.17	1.81	0.05	0.03	0	0	0.05	0.03	-1.68	1.38	-3.44	0.66	-5.12	1.79	-78.9	2.07	-0.52
	90	91	LEU	323	8.77	1.85	11.66	1.29	20.43	2.32	-4.63	0.95	-2.56	0.91	-7.19	1.45	-28.94	0.34	-0.46	0.84	-29.41	0.95	-24.81	2.04	8.64	1.47	-16.16	2.72	5.15	0.22	-7.63	0.48	-2.48	0.49	0	0	0	0	0	0	5.15	0.22	-7.63	0.48	-2.48	0.49	-19.65	2.07	1.01
	91	92	LEU	324	8.39	1.94	11.77	1.38	20.16	2.49	-2.97	0.89	-2.64	0.79	-5.61	1.27	-28.72	0.54	-5.26	0.97	-33.98	1.21	-23.3	2.22	3.87	1.5	-19.43	2.89	4.7	0.4	-6.97	0.63	-2.27	0.82	0.16	0.04	0	0	0.16	0.04	4.86	0.41	-6.97	0.63	-2.11	0.82	-18.44	2.17	-3.1
	92	93	ASP	325	4.37	1.38	10.78	1.19	15.15	1.94	-1.87	0.75	-2.16	0.6	-4.03	0.99	35	6.92	3.56	1.67	38.55	7.22	37.49	6.92	12.17	1.75	49.67	7.22	-98.19	7.07	-17.13	1.43	-115.31	7.71	0.41	0.05	0.03	0.02	0.44	0.05	-97.77	7.05	-17.1	1.42	-114.87	7.7	-60.28	1.24	-4.92
	93	94	TYR	326	8.59	2.23	10.91	1.26	19.5	2.51	-3.2	0.75	-2.39	0.79	-5.59	1.07	-20.59	0.9	-3.71	1.47	-24.3	1.82	-15.2	2.29	4.82	1.97	-10.39	2.66	-1.63	0.51	-5.23	0.79	-6.86	1.06	0.18	0.04	0.02	0.01	0.2	0.05	-1.45	0.49	-5.21	0.79	-6.66	1.04	-16.65	2.35	-0.39
	94	95	LEU	327	8.73	2.02	11.57	1.56	20.3	2.43	-4.77	0.89	-2.25	0.86	-7.02	1.33	-29.07	0.35	6.67	1.29	-22.4	1.23	-25.11	2.16	15.99	1.92	-9.12	2.99	5.66	0.25	-8.47	1.07	-2.81	0.98	0	0	0	0	0	0	5.66	0.25	-8.47	1.07	-2.81	0.98	-19.44	2.15	7.52
	95	96	ARG	328	12.5	2.87	10.79	1.58	23.3	3.31	-3.84	0.88	-0.86	0.65	-4.71	1.16	-234.43	5.85	-8.61	1.26	-243.04	5.48	-225.77	6.5	1.32	1.7	-224.45	6.28	48.39	5.38	-6.24	0.98	42.15	5.08	0.78	0.06	0.22	0.04	1.01	0.07	49.18	5.36	-6.02	0.98	43.16	5.07	-176.59	2.7	-4.69
	96	97	GLU	329	6.62	1.82	10.64	1.5	17.26	2.51	-0.97	0.56	0.14	0.71	-0.83	0.97	63.52	3.95	-2.93	1.61	60.59	5.09	69.16	4.41	7.85	1.84	77.01	5.54	-126.15	4.04	-15.27	1.28	-141.42	5.02	0.9	0.06	0.15	0.04	1.05	0.06	-125.24	4.04	-15.12	1.28	-140.37	5.03	-56.08	1.59	-7.27
	97	98	CYS	330	3.44	0.95	10.09	1.3	13.54	1.77	-2.91	0.5	-0.97	0.79	-3.89	0.98	5.93	1.28	-6.83	2.13	-0.9	2.5	6.46	1.54	2.28	2.46	8.75	2.94	-1.89	0.76	-1.35	1.63	-3.24	1.83	0.04	0.02	0.1	0.03	0.13	0.04	-1.86	0.76	-1.25	1.61	-3.11	1.8	4.61	1.18	1.03
	98	99	ASN	331	11.15	2	10.54	1.08	21.69	2.44	-1.67	0.63	-0.91	0.84	-2.58	1.17	-84.96	3.44	0.28	1.76	-84.68	4.59	-75.48	3.96	9.9	1.64	-65.57	4.78	-2.79	2.59	-3.49	0.85	-6.28	3.09	0.5	0.06	0.08	0.03	0.58	0.06	-2.29	2.55	-3.42	0.86	-5.7	3.07	-77.76	2.03	6.48
	99	100	ARG	332	13.41	2.86	11.25	1.55	24.66	3.43	-2.88	0.96	-0.96	0.65	-3.84	1.18	-231.24	5.63	-1.02	1.38	-232.26	5.57	-220.71	6.82	9.26	1.75	-211.44	6.97	46.94	5.73	-8.39	1.03	38.55	5.65	0.87	0.13	0.14	0.03	1.01	0.14	47.81	5.65	-8.25	1.03	39.57	5.55	-172.89	2.88	1.02
	100	101	GLN	333	14.49	2.54	10	1.31	24.5	2.91	-0.43	0.74	0.88	0.85	0.45	1.3	-64.36	1.79	-11.1	1.03	-75.46	2.17	-50.29	2.56	-0.21	1.55	-50.51	3.12	-10.39	1.55	-6.55	0.8	-16.94	1.93	1.01	0.07	0.24	0.05	1.25	0.06	-9.38	1.51	-6.31	0.78	-15.69	1.9	-59.68	2.12	-6.53
	101	102	GLU	334	5.93	2	10.6	1.41	16.53	2.57	-0.87	0.6	0.34	0.84	-0.53	1.12	48.4	5.46	2.43	0.98	50.83	5.77	53.46	5.75	13.36	1.44	66.82	6.32	-111.75	5.24	-12.83	0.72	-124.57	5.41	0.81	0.05	0.24	0.03	1.06	0.05	-110.93	5.22	-12.58	0.71	-123.52	5.4	-57.47	1.92	0.78
	102	103	VAL	335	6.14	1.49	10.33	1.29	16.46	2.04	-2.21	0.78	0.2	0.85	-2.01	1.27	-23.05	0.52	0.06	1.4	-22.98	1.41	-19.12	1.71	10.59	1.68	-8.53	2.33	7.74	0.44	-12.97	1.29	-5.22	1.16	0.07	0.04	0.05	0.04	0.12	0.07	7.81	0.44	-12.92	1.26	-5.11	1.12	-11.31	1.65	-2.33
	103	104	ASN	336	11.51	1.63	10.3	1.23	21.81	2.15	-1.1	0.68	-0.51	0.81	-1.61	1.17	-79.12	1.56	-8.17	1.35	-87.28	2.18	-68.71	1.81	1.62	1.42	-67.09	2.57	-7.85	1.31	-2.71	0.73	-10.57	1.39	0.67	0.06	0.05	0.03	0.72	0.07	-7.18	1.28	-2.66	0.73	-9.84	1.35	-75.89	1.46	-1.04
	104	105	ALA	337	2.8	0.76	11.25	1.47	14.05	1.71	-0.96	0.26	-1.19	0.99	-2.15	0.96	2.21	0.14	-5.02	1.14	-2.81	1.18	4.05	0.86	5.04	1.56	9.09	1.85	-0.22	0.06	-2.19	0.53	-2.41	0.55	0.21	0.08	0.04	0.02	0.25	0.09	-0.01	0.09	-2.15	0.53	-2.16	0.55	4.04	0.88	2.88
	105	106	VAL	338	6.72	1.68	10.69	1.39	17.41	2.17	-0.28	0.7	-0.45	0.83	-0.73	1.24	-22.18	0.6	-3.28	1.13	-25.46	1.32	-15.74	1.9	6.95	1.73	-8.79	2.56	6.74	0.49	-10	0.83	-3.26	0.93	0.65	0.1	0.04	0.02	0.69	0.1	7.38	0.5	-9.96	0.82	-2.57	0.91	-8.35	1.82	-3
	106	107	VAL	339	6.12	1.54	10.72	1.29	16.84	2.01	-1.85	0.64	-0.32	1.05	-2.17	1.16	-21.91	0.49	-5.37	1.07	-27.28	1.09	-17.64	1.73	5.03	1.61	-12.61	2.39	6.98	0.36	-8.41	0.56	-1.42	0.53	0.19	0.05	0.01	0.01	0.2	0.05	7.17	0.36	-8.4	0.55	-1.22	0.51	-10.47	1.71	-3.37
	107	108	LEU	340	9.21	2.17	11.17	1.36	20.39	2.61	-3.24	0.85	-2.29	0.76	-5.53	1.24	-28.16	0.46	-1.13	0.93	-29.29	0.98	-22.18	2.3	7.76	1.51	-14.43	2.91	4.9	0.33	-6.28	0.43	-1.38	0.57	0.09	0.03	0.01	0.01	0.09	0.04	4.99	0.33	-6.27	0.43	-1.28	0.56	-17.19	2.31	1.48
	108	109	LEU	341	9	1.98	11.6	1.47	20.6	2.83	-2.04	1.04	-0.93	0.99	-2.96	1.55	-28.56	0.53	-6.72	1.49	-35.28	1.62	-21.59	2.21	3.95	1.68	-17.63	3.05	5.06	0.32	-6.37	0.45	-1.31	0.53	0.2	0.07	0.01	0.01	0.2	0.07	5.26	0.31	-6.36	0.45	-1.1	0.53	-16.33	2.22	-2.41
	109	110	TYR	342	8.47	2.11	10.98	1.31	19.44	2.77	-1.71	0.62	-2.34	0.76	-4.05	1.03	-19.56	0.61	-10.14	0.91	-29.69	1.13	-12.8	2.27	-1.5	1.64	-14.3	3.08	-2.62	0.47	-2.4	0.4	-5.02	0.65	0.74	0.06	0.02	0.01	0.76	0.06	-1.88	0.44	-2.38	0.4	-4.26	0.62	-14.68	2.26	-3.89
	110	111	MET	343	6.99	1.73	11.39	1.17	18.38	2.22	-6.35	0.63	-3.16	0.66	-9.51	0.9	-3.01	0.45	-7.27	1.06	-10.28	1.16	-2.37	2.05	0.95	1.58	-1.42	2.67	3.01	0.3	-3.96	0.56	-0.95	0.6	0	0	0	0	0	0	3.01	0.3	-3.96	0.56	-0.94	0.6	0.64	1.96	-3
	111	112	ALA	344	2.85	0.84	11.32	1.31	14.17	1.63	-1.93	0.4	-3.22	0.99	-5.15	1.11	2.16	0.14	-11.75	1.79	-9.59	1.85	3.08	0.9	-3.65	1.89	-0.56	2.19	-0.24	0.06	-0.12	0.44	-0.36	0.46	0	0	0	0	0	0.01	-0.24	0.06	-0.12	0.44	-0.36	0.46	2.84	0.91	-3.76
	112	113	THR	345	6.29	1.42	11.65	1.46	17.94	2.17	-1.94	0.81	-1.86	1.02	-3.81	1.3	-24.63	0.99	-10.75	2.03	-35.39	2.21	-20.29	1.41	-0.97	2.18	-21.26	2.72	1.22	0.46	-4.24	0.72	-3.02	0.86	0.25	0.07	0	0	0.25	0.07	1.47	0.43	-4.24	0.72	-2.77	0.83	-18.82	1.43	-5.21
	113	114	GLN	346	13.41	1.59	10.91	1.32	24.32	2.14	-5.57	0.88	-2.78	0.78	-8.34	1.2	-74.52	1.59	-4.67	1.74	-79.19	2.19	-66.67	1.92	3.46	1.84	-63.21	2.76	1.27	0.72	-3.28	0.61	-2.02	0.88	0.05	0.02	0.01	0.01	0.06	0.02	1.32	0.71	-3.27	0.61	-1.96	0.87	-65.36	1.67	0.19
	114	115	ILE	347	9.64	2.16	11.22	1.25	20.86	2.57	-3.14	1.14	-1.35	0.95	-4.49	1.56	-7.49	0.33	-4.64	1.24	-12.13	1.23	-0.99	2.4	5.23	1.87	4.24	3.25	5.95	0.26	-6.74	0.53	-0.79	0.52	0	0	0	0	0	0	5.95	0.26	-6.74	0.53	-0.79	0.52	4.96	2.39	-1.51
	115	116	SER	348	3.53	0.85	11.38	1.29	14.91	1.69	-2.86	0.79	-2.8	0.87	-5.66	1.25	-5.72	1.06	-8.27	1.29	-13.99	1.77	-5.05	1.29	0.31	1.65	-4.74	2.04	2.39	0.54	-5.83	0.63	-3.44	0.73	0	0	0	0	0	0	2.39	0.54	-5.83	0.63	-3.44	0.73	-2.65	1.38	-5.53
	116	117	SER	349	3.39	0.97	11.22	1.19	14.61	1.7	-1.93	0.69	-2.96	0.62	-4.9	0.96	-5.21	2.17	-7.47	1.37	-12.67	2.1	-3.75	2.04	0.79	1.69	-2.96	2.43	1.49	1.76	-5.25	0.91	-3.76	1.79	0.13	0.03	0.01	0.01	0.14	0.04	1.62	1.74	-5.25	0.91	-3.62	1.78	-2.12	1.18	-4.46
	117	118	ALA	350	2.77	0.75	11	1.33	13.77	1.66	-2.28	0.29	-3.31	0.73	-5.59	0.81	2.3	0.15	-8.24	0.78	-5.94	0.83	2.79	0.84	-0.55	1.45	2.23	1.78	-0.24	0.07	0.21	0.53	-0.03	0.55	0	0	0.01	0.01	0.01	0.01	-0.24	0.07	0.21	0.53	-0.03	0.55	2.55	0.84	-0.34
	118	119	MET	351	7.07	1.65	10.89	1.45	17.96	2.29	-6.44	0.69	-2.78	0.77	-9.22	1.18	-4.36	0.38	-8.82	1.07	-13.18	1.13	-3.72	1.88	-0.72	1.59	-4.44	2.65	3.96	0.25	-4.08	0.55	-0.11	0.54	0.01	0.01	0	0	0.01	0.01	3.97	0.25	-4.08	0.55	-0.1	0.54	0.25	1.83	-4.79
	119	120	GLU	352	8.15	2.03	10.87	1.44	19.02	2.79	-3.44	1.02	-2.47	0.87	-5.92	1.33	23.6	8.23	-3.64	1.63	19.95	8.38	28.3	7.93	4.75	1.8	33.05	8.35	-83.49	7.66	-8.65	1.23	-92.14	7.61	0.17	0.05	0	0	0.17	0.05	-83.32	7.64	-8.65	1.23	-91.97	7.58	-55.02	1.82	-3.9
	120	121	TYR	353	8.66	1.85	10.69	1.32	19.35	2.4	-2.62	0.8	-2.74	0.71	-5.36	1.19	-17.31	1.02	-6.78	0.99	-24.09	1.63	-11.27	2.24	1.17	1.77	-10.1	3.09	-3.68	0.82	-1.05	0.6	-4.74	1.17	0.47	0.07	0	0	0.47	0.07	-3.21	0.78	-1.05	0.6	-4.26	1.13	-14.48	2.04	0.12
	121	122	LEU	354	9.25	2.15	11.82	1.63	21.07	2.81	-3.16	0.92	-2.56	0.83	-5.73	1.24	-28.7	0.53	-8.39	1.12	-37.09	1.08	-22.62	2.42	0.87	1.7	-21.75	3.17	4.9	0.31	-3.46	0.67	1.44	0.53	0.07	0.03	0	0	0.07	0.03	4.97	0.33	-3.46	0.67	1.51	0.53	-17.65	2.38	-2.59
	122	123	GLU	355	5.86	1.54	11.54	1.41	17.4	2.12	-4.14	1.04	-1.63	0.79	-5.77	1.39	32.05	5.36	-0.12	1.28	31.93	5.8	33.77	5.53	9.79	1.65	43.56	6.12	-88	5.2	-8.02	0.81	-96.02	5.55	0.16	0.03	0.05	0.01	0.21	0.03	-87.84	5.2	-7.97	0.81	-95.82	5.54	-54.08	1.98	1.82
	123	124	LYS	356	12.22	2.66	11.69	1.51	23.91	3.39	-1.13	1.04	-0.68	0.65	-1.81	1.27	-69.98	8.66	0.85	1.17	-69.13	8.87	-58.89	8.09	11.86	1.74	-47.03	8.52	40.38	7.38	-4.13	0.7	36.25	7.54	0.85	0.06	0.26	0.02	1.11	0.06	41.23	7.37	-3.87	0.69	37.36	7.52	-17.66	2.8	7.99
	124	125	LYS	357	11.54	2.47	10.47	1.51	22.01	2.99	-2.86	0.99	-0.12	0.61	-2.98	1.17	-49.6	13.76	-8.89	1.21	-58.48	13.29	-40.92	14.01	1.46	1.5	-39.46	13.56	20.69	12.29	-3.8	1.11	16.88	11.89	0.5	0.12	0.16	0.03	0.66	0.11	21.18	12.19	-3.64	1.1	17.54	11.79	-19.74	3.04	-2.18
	125	126	ASN	358	11.11	1.89	10.99	1.58	22.11	2.41	-0.69	0.51	-0.07	0.76	-0.76	0.98	-75.75	1.54	-14.33	1.87	-90.08	2.19	-65.33	2	-3.41	2.43	-68.74	2.99	-11.04	1.1	-1.58	1.34	-12.62	1.68	0.74	0.05	0.12	0.02	0.86	0.06	-10.31	1.08	-1.46	1.33	-11.76	1.66	-75.64	1.65	-4.87
	126	127	PHE	359	8.28	2.07	10.02	1.2	18.3	2.52	-1.04	0.68	-1.36	0.81	-2.4	1.14	0.22	0.58	-2.47	0.86	-2.24	1.05	7.47	2.27	6.19	1.4	13.66	2.82	-0.44	0.48	-5.55	0.59	-5.99	0.85	0.57	0.08	0.03	0.01	0.6	0.08	0.13	0.45	-5.52	0.58	-5.39	0.83	7.6	2.23	0.67
	127	128	ILE	360	10.11	2.21	10.93	1.52	21.04	2.77	-1.59	1.03	-0.47	0.73	-2.05	1.41	-7.55	0.38	0.09	0.95	-7.46	1	0.97	2.22	10.55	1.65	11.53	2.89	5.12	0.33	-9.08	0.81	-3.96	0.78	0.41	0.06	0.05	0.02	0.47	0.06	5.54	0.32	-9.03	0.81	-3.49	0.76	6.51	2.17	1.52
	128	129	HIS	361	25.18	1.63	11.75	1.28	36.92	2.18	-6.71	0.72	-0.96	0.92	-7.67	1.22	-11.27	1.47	0.37	1.44	-10.9	2.23	7.2	2.17	11.15	1.6	18.35	2.72	-1.47	0.95	-6.58	0.97	-8.06	1.48	0.07	0.03	0.1	0.03	0.17	0.05	-1.4	0.95	-6.48	0.98	-7.88	1.51	5.8	1.92	4.68
	129	130	ARG	362	13.27	2.44	12.87	1.73	26.14	3.24	-4.58	1.09	-1.48	0.76	-6.06	1.41	-217.11	6.25	-12.14	1.12	-229.25	6.1	-208.42	6.28	-0.76	1.8	-209.18	6.42	34.08	5.61	-1.79	0.65	32.29	5.43	0.34	0.06	0.08	0.02	0.42	0.07	34.42	5.58	-1.71	0.65	32.71	5.39	-174	2.52	-2.47
	130	131	ASP	363	4.87	1.47	10.03	1.45	14.9	1.93	-1.83	1.13	-0.6	0.91	-2.43	1.51	20.56	5.21	-5.05	1.39	15.51	5.56	23.6	5.34	4.38	1.83	27.98	5.71	-80.48	5.29	-11.57	0.83	-92.05	5.46	0.11	0.02	0.02	0.01	0.13	0.03	-80.37	5.28	-11.56	0.83	-91.92	5.45	-56.77	1.56	-7.18
	131	132	LEU	364	8.89	1.71	10.61	1.34	19.49	2.16	-4.28	0.81	-1.88	0.7	-6.16	1.08	-29	0.35	2.5	0.73	-26.5	0.83	-24.39	1.91	11.22	1.57	-13.17	2.59	5.18	0.23	-8.73	0.42	-3.54	0.4	0	0	0.01	0.01	0.01	0.01	5.18	0.23	-8.71	0.42	-3.53	0.4	-19.21	1.87	2.51
	132	133	ALA	365	2.33	0.82	9.6	1.22	11.93	1.66	-1.71	0.37	-3.01	0.74	-4.72	0.78	2.55	0.13	-9.08	1.11	-6.53	1.12	3.17	0.93	-2.48	1.39	0.68	1.95	-0.38	0.08	-0.16	0.36	-0.54	0.37	0.02	0.01	0	0	0.02	0.01	-0.36	0.08	-0.16	0.36	-0.52	0.37	2.81	0.94	-2.65
	133	134	ALA	366	2.83	1.02	10.97	1.21	13.8	1.68	-2.24	0.36	-3.21	0.79	-5.45	0.91	2.06	0.13	-0.68	1.21	1.38	1.21	2.66	1.11	7.08	1.54	9.74	2.13	-0.04	0.06	-0.37	0.35	-0.41	0.36	0	0	0	0	0	0	-0.04	0.06	-0.37	0.35	-0.41	0.36	2.62	1.11	6.7
	134	135	ARG	367	12.78	2.74	10.44	1.44	23.21	3.35	-4.72	0.91	-1.76	0.83	-6.48	1.33	-228.78	4.92	-4.92	1.37	-233.7	4.75	-220.72	5.27	3.76	1.62	-216.97	5.46	42.75	4.37	-3.93	0.77	38.83	4.21	0.21	0.04	0.01	0.01	0.21	0.04	42.96	4.36	-3.92	0.76	39.04	4.2	-177.76	2.65	-0.16
	135	136	ASN	368	11.84	1.91	10.07	1.22	21.91	2.39	-4.33	0.87	-1.87	0.75	-6.2	1.1	-85.82	2.7	-12.87	0.85	-98.69	2.85	-78.32	3.1	-4.66	1.41	-82.98	3.56	-0.77	1.21	-1.73	0.55	-2.5	1.38	0	0	0	0	0	0	-0.77	1.21	-1.73	0.55	-2.49	1.38	-79.09	2.33	-6.39
	136	137	CYS	369	3.07	0.97	9.38	1.22	12.45	1.8	-4.22	0.4	-2.33	0.78	-6.56	0.9	6.12	0.53	-6.97	0.9	-0.85	1.04	4.97	1.06	0.08	1.34	5.04	1.98	-1.81	0.24	0.16	0.35	-1.64	0.38	0	0	0	0	0	0	-1.81	0.24	0.16	0.35	-1.64	0.38	3.16	1.02	0.24
	137	138	LEU	370	8.63	1.97	10.02	1.37	18.65	2.61	-3.58	0.89	-2.4	0.8	-5.98	1.18	-27.89	0.35	-2.99	0.95	-30.88	1.01	-22.84	2.25	4.63	1.42	-18.2	2.77	4.57	0.23	-4.77	0.4	-0.2	0.36	0.01	0.01	0	0	0.01	0.01	4.58	0.23	-4.77	0.4	-0.19	0.36	-18.26	2.27	-0.14
	138	139	VAL	371	6.05	1.64	9.23	1.24	15.28	2.28	-3.64	0.8	-1.99	0.77	-5.63	1.18	-23.85	0.41	-7.9	0.97	-31.76	0.99	-21.44	1.8	-0.67	1.34	-22.11	2.2	8.23	0.3	-7.96	0.56	0.28	0.51	0	0	0	0	0	0	8.23	0.3	-7.96	0.56	0.28	0.51	-13.21	1.75	-8.62
	139	140	GLY	372	0	0	8.9	1.29	8.9	1.29	0	0	-3.25	0.89	-3.25	0.89	0	0	-9.46	1.38	-9.46	1.38	0	0	-3.81	1.89	-3.81	1.89	0	0	-4.45	1	-4.45	1	0	0	0.01	0.01	0.01	0.01	0	0	-4.44	1	-4.44	1	0	0	-8.25
	140	141	GLU	373	5.97	1.65	9.6	1.32	15.57	2.29	-0.73	0.81	-0.71	0.78	-1.44	1.21	34.8	2.76	2.97	1.08	37.78	2.84	40.04	2.96	11.87	1.8	51.91	3.44	-96.26	2.65	-11.61	0.75	-107.87	2.7	0.73	0.04	0.04	0.01	0.77	0.04	-95.54	2.66	-11.57	0.75	-107.1	2.69	-55.49	1.53	0.3
	141	142	ASN	374	10.9	1.62	11.06	1.45	21.96	2.28	-0.17	0.42	-0.3	0.74	-0.47	1.03	-75.45	1.26	-4.57	1.54	-80.02	2.16	-64.72	1.95	6.19	1.85	-58.53	2.91	-12.13	0.88	-3.95	1.17	-16.09	1.54	0.87	0.03	0.14	0.02	1.01	0.03	-11.26	0.87	-3.81	1.17	-15.08	1.54	-75.98	1.51	2.38
	142	143	HIS	375	24.66	1.69	11.14	1.61	35.8	2.34	-3.75	0.65	-1.92	0.66	-5.67	1.02	-12.92	1.12	-6.63	0.95	-19.56	1.43	7.99	2.01	2.58	1.59	10.57	2.65	-2.31	0.99	-3.77	0.43	-6.08	1.05	0.33	0.06	0.01	0.01	0.34	0.06	-1.98	0.94	-3.76	0.43	-5.74	1	6.01	1.76	-1.18
	143	144	LEU	376	9.25	2.09	10.43	1.2	19.68	2.58	-1.73	0.94	-1.24	0.9	-2.97	1.36	-28.5	0.38	-2.76	1.26	-31.26	1.32	-20.98	2.38	6.43	1.7	-14.55	3.02	4.54	0.28	-6.24	0.64	-1.69	0.65	0.42	0.04	0	0	0.42	0.04	4.96	0.27	-6.24	0.64	-1.27	0.66	-16.02	2.35	0.19
	144	145	VAL	377	5.83	1.67	9.82	1.07	15.65	2.2	-3.69	0.63	-1.88	0.76	-5.58	1.07	-22.86	0.45	-1.37	1.34	-24.24	1.39	-20.73	1.75	6.56	1.65	-14.16	2.58	7.51	0.32	-7.74	0.66	-0.22	0.54	0	0	0	0	0	0	7.52	0.32	-7.74	0.66	-0.22	0.54	-13.21	1.72	-1.18
	145	146	LYS	378	10.82	2.11	10.39	1.4	21.21	2.56	-5.25	0.91	-2.47	0.79	-7.72	1.32	-71.67	5.41	-7.29	0.81	-78.97	5.53	-66.1	5.75	0.62	1.45	-65.48	5.89	43.7	4.81	-2.18	0.32	41.52	4.83	0.17	0.03	0	0	0.17	0.03	43.87	4.8	-2.18	0.32	41.68	4.83	-22.23	2.39	-1.56
	146	147	VAL	379	6.36	1.76	9.77	1.24	16.13	2.25	-2.97	0.74	-0.97	0.89	-3.94	1.18	-22.25	0.43	-12.24	0.89	-34.49	0.96	-18.86	1.92	-3.44	1.58	-22.3	2.61	7.07	0.3	-6.92	0.52	0.15	0.41	0.02	0.01	0	0	0.02	0.01	7.09	0.3	-6.92	0.52	0.17	0.41	-11.78	1.9	-10.36
	147	148	ALA	380	2.54	0.95	9.96	1.48	12.5	1.96	-1.55	0.43	-2.16	0.73	-3.71	0.82	2.31	0.14	-5.41	1.17	-3.1	1.22	3.3	1.01	2.39	1.73	5.69	2.2	-0.36	0.07	-3.23	0.85	-3.59	0.88	0	0	0.04	0.02	0.04	0.02	-0.36	0.07	-3.19	0.85	-3.55	0.89	2.94	1.02	-0.81
	148	149	ASP	381	3.96	1.75	10.09	1.51	14.05	2.56	-2.23	0.77	-0.96	0.82	-3.19	1.3	33.26	5.55	-2.18	1.97	31.08	6.39	35	5.72	6.95	2.19	41.94	6.66	-94.5	5.34	-9.65	1.27	-104.16	5.77	0.37	0.08	0.04	0.02	0.42	0.08	-94.13	5.31	-9.61	1.27	-103.74	5.74	-59.13	1.72	-2.66
	149	150	PHE	382	7.93	1.8	9.63	1.47	17.55	2.38	-3.33	0.74	-1.07	0.69	-4.4	1.1	1.29	0.38	-5.95	1.76	-4.66	1.83	5.89	2.04	2.6	2.09	8.5	3.2	-0.03	0.31	-1.82	1.03	-1.85	1.09	0.01	0.01	0.04	0.03	0.05	0.03	-0.02	0.31	-1.78	1.04	-1.8	1.1	5.87	2.08	0.83
	150	151	GLY	383	0	0	9.34	1.29	9.34	1.29	0	0	-1.83	0.83	-1.83	0.83	0	0	-12.33	1.96	-12.33	1.96	0	0	-4.82	2.04	-4.82	2.04	0	0	2.13	0.98	2.13	0.98	0	0	0.13	0.04	0.13	0.04	0	0	2.26	0.98	2.26	0.98	0	0	-2.55
	151	152	LEU	384	8.85	1.81	11.05	1.27	19.9	2.21	-3.2	0.91	-1.32	0.73	-4.53	1.16	-27.54	0.51	-8.03	0.96	-35.57	1.11	-21.89	1.97	1.69	1.51	-20.2	2.3	4.04	0.4	-2.41	0.48	1.64	0.56	0.04	0.03	0	0.01	0.05	0.03	4.09	0.38	-2.4	0.48	1.68	0.55	-17.8	1.87	-0.71
	152	153	SER	385	3.89	1.22	10.85	1.42	14.74	2.06	-1.63	0.38	-1.31	0.72	-2.94	0.91	-4.09	1	-3.57	1.42	-7.67	1.9	-1.84	1.73	5.96	1.97	4.13	2.97	0.47	0.93	-2.92	1.16	-2.45	1.57	0.23	0.04	0.02	0.01	0.24	0.05	0.7	0.92	-2.9	1.15	-2.2	1.55	-1.14	1.57	3.06
	153	154	ARG	386	13	2.95	10.52	1.42	23.52	3.53	-1.38	1.45	0.06	0.76	-1.32	1.65	-236.15	8.67	-1.83	1	-237.98	8.58	-224.53	8.77	8.75	1.54	-215.78	9.02	46.39	7.39	-5.46	0.68	40.93	7.23	0.83	0.12	0.22	0.05	1.05	0.13	47.22	7.41	-5.24	0.65	41.98	7.25	-177.31	3.31	3.51
	154	155	LEU	387	8.45	1.79	11.73	1.33	20.17	2.37	-0.67	1.03	-0.34	0.77	-1.01	1.34	-26.64	0.47	-5.89	0.91	-32.53	0.94	-18.87	1.95	5.5	1.32	-13.37	2.27	2.93	0.39	-6.66	0.71	-3.73	0.59	0.53	0.17	0.16	0.05	0.69	0.13	3.46	0.35	-6.5	0.68	-3.04	0.65	-15.41	1.96	-1
	155	156	MET	388	7.08	2.05	11.04	1.4	18.12	2.61	-4.02	0.66	-1.4	0.65	-5.42	1.07	-1.75	0.64	-11.11	1.45	-12.86	1.42	1.31	2.28	-1.47	1.82	-0.16	2.88	1.19	0.61	-3.5	0.49	-2.31	0.64	0.38	0.07	0.02	0.01	0.4	0.07	1.57	0.6	-3.48	0.49	-1.91	0.62	2.88	2.2	-4.95
	156	157	THR	389	6.29	1.35	10.65	1.56	16.94	2.26	-1.27	0.64	-0.05	0.76	-1.32	1.08	-22.5	1.08	-8.18	1.3	-30.67	1.56	-17.48	1.82	2.43	1.81	-15.05	2.71	-2	0.82	-7.85	0.82	-9.85	0.92	0.41	0.07	0.13	0.03	0.53	0.06	-1.59	0.84	-7.72	0.82	-9.31	0.94	-19.08	1.6	-5.29
	157	158	GLY	390	0	0	9.12	1.36	9.12	1.36	0	0	-0.1	0.58	-0.1	0.58	0	0	-5.71	1.49	-5.71	1.49	0	0	3.31	1.99	3.31	1.99	0	0	-8.08	0.91	-8.08	0.91	0	0	0.64	0.02	0.64	0.02	0	0	-7.43	0.91	-7.43	0.91	0	0	-4.12
	158	159	ASP	391	4.08	1.51	12.04	1.46	16.12	2.28	-0.29	1.1	-0.3	0.6	-0.59	1.14	-8.63	5.3	0.84	1.33	-7.79	5.54	-4.84	5.07	12.58	2.06	7.73	5.91	-59.24	4.56	-13.03	1.13	-72.27	4.92	0.38	0.05	0.23	0.03	0.62	0.05	-58.86	4.53	-12.8	1.12	-71.66	4.89	-63.7	1.72	-0.22
	159	160	THR	392	6.74	1.38	11.82	1.45	18.56	2.09	-0.89	1.27	-0.91	0.97	-1.79	1.82	-32.21	1.77	-12.07	1.23	-44.28	2.04	-26.36	2.11	-1.15	1.6	-27.51	2.71	3.67	0.5	-3.68	0.52	-0.02	0.62	0.02	0.02	0.05	0.02	0.08	0.03	3.69	0.5	-3.63	0.52	0.06	0.62	-22.67	1.85	-4.78
	160	161	TYR	393	8.86	2.1	10.76	1.46	19.62	2.8	-5.17	1.13	-2.5	0.77	-7.67	1.31	-27.39	1.46	-5.1	1.73	-32.5	2.43	-23.7	2.36	3.16	1.85	-20.54	3.1	2.23	0.51	-4.75	1.46	-2.51	1.53	0.01	0.01	0.04	0.03	0.05	0.02	2.25	0.51	-4.71	1.44	-2.46	1.52	-21.45	2.25	-1.55
	161	162	THR	394	6.49	1.46	10.78	1.43	17.27	2.1	-2.39	0.8	-0.91	0.79	-3.29	1.06	-24.34	1.5	-12.23	1.34	-36.57	2.15	-20.24	2.28	-2.36	1.92	-22.59	2.9	0.86	1.05	-2.5	0.92	-1.63	1.56	0.23	0.09	0.05	0.01	0.28	0.09	1.09	0.97	-2.44	0.92	-1.35	1.49	-19.14	1.71	-4.8
	162	163	ALA	395	2.77	0.87	10.63	1.34	13.4	1.76	-0.21	0.4	-0.49	0.65	-0.71	0.94	2.1	0.16	1.74	1.48	3.84	1.54	4.66	0.94	11.88	1.76	16.54	2.1	-0.11	0.11	-7.54	0.76	-7.64	0.79	0.48	0.06	0.24	0.06	0.72	0.1	0.37	0.16	-7.3	0.78	-6.93	0.83	5.03	0.98	4.58
	163	164	HIS	396	25.45	2.03	10.08	1.28	35.53	2.5	-4.56	0.96	-0.31	0.92	-4.87	1.42	-11.63	2.27	-5.92	2.21	-17.55	2.66	9.26	3.06	3.85	2.48	13.11	3.62	-4.14	1.72	-5.41	1.82	-9.54	2.08	0.33	0.09	0.15	0.05	0.48	0.09	-3.8	1.68	-5.26	1.8	-9.06	2.07	5.45	2.25	-1.41
	164	165	ALA	397	2.74	0.77	10.27	1.72	13.01	2.01	-0.19	0.24	0.48	0.61	0.29	0.7	2.29	0.12	-3.16	1.26	-0.87	1.28	4.85	0.84	7.58	1.97	12.43	2.34	-0.2	0.07	-7.08	1.4	-7.27	1.41	0.48	0.04	0.35	0.06	0.83	0.09	0.29	0.08	-6.73	1.36	-6.44	1.35	5.14	0.83	0.86
	165	166	GLY	398	0	0	9.41	1.52	9.41	1.52	0	0	-0.38	0.72	-0.38	0.72	0	0	-5.53	3.46	-5.53	3.46	0	0	3.51	3.87	3.51	3.87	0	0	-6.74	2.68	-6.74	2.68	0	0	0.37	0.13	0.37	0.13	0	0	-6.37	2.64	-6.37	2.64	0	0	-2.86
	166	167	ALA	399	2.68	0.89	9.85	1.25	12.53	1.7	-0.64	0.3	-0.97	0.77	-1.62	0.82	2.24	0.15	0.96	2.01	3.2	2.03	4.27	0.91	9.84	2	14.11	2.26	-0.08	0.08	-2.69	1.2	-2.77	1.21	0.31	0.07	0.11	0.05	0.42	0.1	0.23	0.11	-2.58	1.2	-2.35	1.23	4.5	0.92	7.26
	167	168	LYS	400	11.34	2.67	10.27	1.41	21.61	3.23	-3.03	0.78	-1.24	0.81	-4.27	1.25	-32.35	6.49	-3.09	1.56	-35.45	6.43	-24.04	6.47	5.93	1.71	-18.11	6.31	7.01	5.93	-4.21	0.98	2.79	6.05	0.55	0.06	0.06	0.02	0.61	0.07	7.55	5.91	-4.16	0.98	3.4	6.02	-16.49	2.53	1.78
	168	169	PHE	401	7.81	1.83	11.26	1.4	19.07	2.52	-3.88	0.77	-1.65	0.91	-5.52	1.34	0.04	0.94	-5.22	1.11	-5.18	1.47	3.98	2.45	4.4	1.61	8.37	3.3	0.06	0.6	-0.47	0.69	-0.42	1.17	0.1	0.05	0	0	0.1	0.05	0.16	0.57	-0.47	0.69	-0.32	1.13	4.13	2.16	3.92
	169	170	PRO	402	12.69	1.7	14.32	1.11	27	2.24	-3.47	0.65	-2.82	0.83	-6.3	1.02	-10.65	0.87	1.25	1.94	-9.39	1.65	-1.43	2.04	12.74	1.87	11.31	2.64	10.07	0.79	-10.95	0.83	-0.88	0.41	0.04	0.02	0	0	0.04	0.02	10.11	0.79	-10.95	0.83	-0.84	0.41	8.68	1.8	1.79
	170	171	ILE	403	9.56	2.01	13.04	1.33	22.6	2.43	-2.77	0.85	-2.12	0.74	-4.89	1.31	-5.97	0.41	1.17	1.01	-4.8	1.01	0.82	2.11	12.09	1.63	12.91	2.48	4.01	0.34	-6.84	0.66	-2.82	0.63	0.13	0.05	0	0.01	0.13	0.05	4.14	0.34	-6.83	0.66	-2.69	0.62	4.96	2.05	5.26
	171	172	LYS	404	11.23	2.1	10.8	1.38	22.03	2.32	-4.22	0.76	-2.48	0.79	-6.7	1.11	-46.33	4.72	-2.45	0.91	-48.78	4.95	-39.31	5.12	5.87	1.42	-33.44	5.32	22.07	4.38	-5.11	0.54	16.96	4.53	0.32	0.07	0	0	0.32	0.07	22.39	4.34	-5.11	0.54	17.28	4.49	-16.92	2.57	0.76
	172	173	TRP	405	11.24	2.19	9.63	1.38	20.87	2.77	-8.33	0.83	-2.14	0.7	-10.47	1.13	-0.42	1.31	-9.66	1.04	-10.09	1.66	2.49	2.66	-2.18	1.54	0.32	3.27	3.72	0.47	-4.58	0.65	-0.86	0.65	0.09	0.02	0.01	0.02	0.1	0.03	3.8	0.47	-4.57	0.64	-0.76	0.65	6.29	2.51	-6.74
	173	174	THR	406	6.79	1.75	10.15	1.25	16.95	2.37	-3.25	0.73	-1.82	0.67	-5.07	1.06	-25.55	1.34	-9.43	1.36	-34.98	2.06	-22.01	2.33	-1.1	1.78	-23.11	3.02	2.5	0.73	-5.4	0.71	-2.91	1.04	0.01	0.01	0.04	0.02	0.05	0.02	2.51	0.73	-5.37	0.7	-2.86	1.04	-19.5	1.94	-6.47
	174	175	ALA	407	2.54	0.72	11.26	1.44	13.81	1.81	-2.31	0.39	-2	0.76	-4.31	0.83	2.32	0.12	0.96	1.17	3.27	1.21	2.55	0.8	10.22	1.59	12.77	2.01	-0.08	0.05	-0.22	0.37	-0.3	0.39	0	0	0.01	0.01	0.02	0.01	-0.08	0.05	-0.21	0.37	-0.29	0.39	2.47	0.79	10.01
	175	176	PRO	408	12.57	1.49	14.6	1.31	27.18	1.97	-4.25	0.61	-2.92	0.7	-7.17	0.91	-11.7	0.76	-0.34	0.98	-12.03	0.85	-3.37	1.81	11.34	1.58	7.97	2.12	10.83	0.69	-11.32	0.73	-0.48	0.6	0.02	0.01	0	0	0.02	0.01	10.85	0.69	-11.31	0.73	-0.46	0.59	7.48	1.67	0.03
	176	177	GLU	409	7.39	1.72	10.99	1.26	18.38	2.29	-1.91	1.39	-2.09	0.84	-4	1.78	-15.09	4.45	-9.53	1.14	-24.62	4.77	-9.61	4.19	-0.64	1.47	-10.24	4.51	-48.57	3.73	-4.24	0.56	-52.81	3.79	0.12	0.03	0.01	0.01	0.13	0.03	-48.46	3.71	-4.23	0.56	-52.68	3.78	-58.06	2.06	-4.86
	177	178	SER	410	3.79	1.13	11.1	1.27	14.89	1.84	-1.82	0.91	-3.18	0.86	-5.01	1.36	-6.53	1.32	-6.1	0.94	-12.63	1.58	-4.56	1.58	1.82	1.23	-2.74	2.16	0.96	0.42	-3.61	0.65	-2.66	0.61	0	0	0.01	0.01	0.01	0.01	0.96	0.42	-3.61	0.65	-2.64	0.61	-3.6	1.5	-1.79
	178	179	LEU	411	9.13	1.8	12.07	1.49	21.2	2.43	-2.54	1.05	-1.32	0.8	-3.86	1.41	-27.68	0.42	-2.22	0.9	-29.9	1.04	-21.09	1.99	8.53	1.51	-12.56	2.44	3.8	0.25	-7.58	0.75	-3.78	0.69	0.14	0.07	0.11	0.04	0.25	0.07	3.94	0.24	-7.48	0.73	-3.54	0.69	-17.15	1.98	1.05
	179	180	ALA	412	2.64	0.8	11.51	1.49	14.15	1.98	-1.33	0.42	-0.95	0.64	-2.28	0.72	2.14	0.13	-6.67	1	-4.53	0.98	3.45	0.9	3.89	1.61	7.34	2.04	0	0.06	-4.55	0.5	-4.55	0.52	0.08	0.04	0.27	0.02	0.35	0.04	0.08	0.08	-4.28	0.49	-4.2	0.52	3.54	0.9	-0.39
	180	181	TYR	413	8.4	1.72	9.98	1.59	18.38	2.61	0.56	0.56	-0.05	0.69	0.51	0.88	-16.21	0.69	-6.43	1.11	-22.65	1.24	-7.26	2.01	3.5	1.49	-3.76	2.5	-6.37	0.66	-2.74	1.03	-9.11	1.13	0.94	0.08	0.16	0.03	1.09	0.07	-5.44	0.64	-2.58	1.01	-8.01	1.11	-12.69	1.81	0.92
	181	182	ASN	414	11.59	1.6	10.24	1.54	21.83	2.23	-1.1	0.67	-0.79	0.59	-1.89	1.01	-77.35	2.41	-4.21	1.35	-81.56	2.77	-66.87	2.17	5.24	1.82	-61.63	2.74	-8.46	1.51	-1.14	1.06	-9.6	1.87	0.46	0.07	0.09	0.02	0.55	0.08	-8	1.52	-1.05	1.04	-9.05	1.85	-74.87	1.38	4.19
	182	183	LYS	415	10.96	2.25	10.06	1.24	21.02	2.69	-1.79	0.68	-0.75	0.92	-2.54	1.21	-15.32	2.95	-4.72	1.06	-20.03	3.02	-6.14	3.95	4.59	1.4	-1.55	4.22	-11.55	3	-4.4	0.57	-15.95	3.09	0.98	0.05	0.04	0.02	1.02	0.05	-10.57	2.98	-4.36	0.57	-14.93	3.08	-16.71	2.26	0.23
	183	184	PHE	416	7.69	1.62	10.09	1.11	17.78	2.01	-3.4	0.65	-1.33	0.49	-4.73	0.84	-0.63	0.52	-10.31	1.11	-10.94	1.22	3.66	1.81	-1.55	1.55	2.11	2.48	0.54	0.33	-3.33	0.7	-2.79	0.71	0.12	0.03	0.19	0.02	0.32	0.05	0.66	0.32	-3.14	0.7	-2.48	0.7	4.32	1.75	-4.69
	184	185	SER	417	3.26	1.09	9.91	1.19	13.17	1.66	-1.35	0.53	-0.89	0.94	-2.24	1.13	-2.23	1.75	-4.21	1.31	-6.44	2.42	-0.32	1.94	4.81	1.62	4.49	2.73	-2.63	1.44	-5.23	0.72	-7.86	1.79	0.28	0.04	0.03	0.01	0.31	0.04	-2.35	1.43	-5.2	0.72	-7.56	1.78	-2.67	1.29	-0.39
	185	186	ILE	418	10.01	2.06	11.29	1.68	21.31	2.93	-2.04	1.06	-1.19	0.76	-3.23	1.42	-7.47	0.47	6.74	1.12	-0.73	1.14	0.5	2.46	16.84	1.65	17.34	3.11	5.24	0.41	-10.64	0.81	-5.41	0.83	0.25	0.05	0.01	0.01	0.26	0.06	5.48	0.41	-10.63	0.81	-5.15	0.82	5.99	2.32	6.2
	186	187	LYS	419	11.39	2.3	10.49	1.39	21.88	2.62	-2.23	0.79	-0.67	0.93	-2.9	1.21	-39.1	8.31	-8.19	1.14	-47.29	8.76	-29.94	7.81	1.63	1.47	-28.31	8.02	13.18	9.08	-4.05	0.63	9.14	9.42	0.65	0.11	0.01	0.01	0.66	0.11	13.84	8.99	-4.04	0.62	9.8	9.33	-16.1	2.97	-2.41
	187	188	SER	420	3.6	1.06	10.95	1.45	14.55	1.87	-2.13	0.83	-2.13	0.75	-4.25	1.23	-11.24	2.1	-13.73	0.92	-24.97	2.31	-9.77	2.21	-4.9	1.51	-14.67	2.45	4.25	0.68	-4.42	0.5	-0.18	0.7	0.02	0.01	0.01	0.01	0.03	0.01	4.27	0.68	-4.41	0.5	-0.14	0.7	-5.51	1.77	-9.31
	188	189	ASP	421	4.71	1.48	11.18	1.4	15.89	2.13	-4.18	0.65	-2.02	0.69	-6.2	0.99	14.35	3.04	-0.61	0.93	13.74	3.5	14.88	2.8	8.55	1.39	23.43	2.94	-71.4	2.83	-10.25	0.47	-81.66	3.05	0.01	0.01	0	0	0.02	0.01	-71.39	2.83	-10.25	0.47	-81.64	3.05	-56.51	1.34	-1.7
	189	190	VAL	422	6.47	1.69	11.22	1.45	17.7	2.37	-3.63	0.79	-1.71	0.97	-5.33	1.26	-23.37	0.52	-5.53	1.09	-28.9	1.15	-20.53	1.89	3.99	1.51	-16.53	2.27	7.85	0.43	-8.86	0.45	-1.01	0.44	0	0	0	0	0	0	7.85	0.43	-8.86	0.45	-1	0.44	-12.67	1.8	-4.86
	190	191	TRP	423	11.19	2.21	10.97	1.31	22.16	2.51	-10.08	0.86	-3.07	0.81	-13.15	1.26	4.24	0.87	-9.63	1.03	-5.39	1.26	5.34	2.52	-1.73	1.52	3.61	3.02	1.29	0.44	-2.97	0.41	-1.68	0.55	0.01	0.01	0	0	0.01	0.01	1.3	0.44	-2.97	0.41	-1.68	0.55	6.64	2.43	-4.7
	191	192	ALA	424	2.58	0.76	10.94	1.31	13.52	1.72	-1.9	0.26	-3.45	0.72	-5.35	0.78	2.1	0.12	-8.74	0.94	-6.64	0.97	2.78	0.81	-1.25	1.45	1.53	1.86	-0.13	0.06	-0.74	0.41	-0.87	0.44	0.05	0.01	0	0	0.05	0.01	-0.08	0.06	-0.74	0.41	-0.82	0.43	2.7	0.8	-1.99
	192	193	PHE	425	7.78	1.68	10.18	1.42	17.95	2.11	-4.75	0.64	-2.24	0.86	-6.99	1.03	0.19	0.24	-8.37	0.93	-8.19	1.02	3.21	1.91	-0.44	1.53	2.77	2.35	0.44	0.18	-2.2	0.34	-1.76	0.4	0	0	0	0	0	0	0.44	0.18	-2.2	0.34	-1.76	0.4	3.65	1.88	-2.63
	193	194	GLY	426	0	0	9.26	1.22	9.26	1.22	0	0	-5.03	0.77	-5.03	0.77	0	0	-8.2	1	-8.2	1	0	0	-3.97	1.31	-3.97	1.31	0	0	-1.06	0.46	-1.06	0.46	0	0	0	0	0	0	0	0	-1.06	0.46	-1.06	0.46	0	0	-5.03
	194	195	VAL	427	5.9	1.77	11.02	1.32	16.92	2.25	-3.83	0.71	-1.92	0.92	-5.75	1.2	-22.17	0.43	-5.31	0.96	-27.48	1	-20.11	1.83	3.79	1.56	-16.31	2.38	7.02	0.26	-8.02	0.42	-1.01	0.35	0	0	0	0	0	0	7.02	0.26	-8.02	0.42	-1.01	0.35	-13.09	1.79	-4.23
	195	196	LEU	428	9.28	1.77	11.61	1.49	20.9	2.43	-3.77	0.95	-2.32	0.84	-6.09	1.42	-29.24	0.34	-3.22	0.86	-32.46	0.95	-23.73	1.91	6.07	1.57	-17.66	2.24	5.17	0.2	-5.9	0.4	-0.74	0.37	0	0	0	0	0	0	5.17	0.2	-5.9	0.4	-0.74	0.37	-18.56	1.88	0.17
	196	197	LEU	429	9.08	1.88	11.6	1.42	20.68	2.45	-3.89	0.95	-2.13	0.87	-6.02	1.28	-28.65	0.47	-5.04	0.72	-33.7	0.79	-23.47	2.09	4.43	1.56	-19.03	2.63	5.06	0.21	-5.86	0.44	-0.8	0.42	0.01	0.01	0	0	0.01	0.01	5.07	0.21	-5.85	0.44	-0.78	0.42	-18.4	2.1	-1.42
	197	198	TRP	430	11.22	2.34	11.28	1.5	22.5	2.74	-9.63	0.92	-2.93	0.93	-12.57	1.4	3.25	0.7	-14	0.98	-10.75	1.31	4.83	2.5	-5.66	1.58	-0.82	2.77	1.76	0.33	-2.66	0.39	-0.9	0.54	0.04	0.03	0	0	0.04	0.03	1.8	0.32	-2.66	0.39	-0.86	0.54	6.64	2.46	-8.32
	198	199	GLU	431	6.71	1.86	11.65	1.34	18.36	2.5	-5.95	0.9	-3.19	0.8	-9.14	1.18	18.09	3.22	-2.34	1	15.75	3.49	18.85	3.88	6.12	1.67	24.97	4.43	-71.98	3.08	-9.21	0.56	-81.18	3.35	0.01	0.01	0	0	0.01	0.01	-71.97	3.08	-9.21	0.56	-81.17	3.35	-53.12	1.86	-3.09
	199	200	ILE	432	9.59	1.93	12.04	1.28	21.63	2.3	-3.67	1.19	-1.61	0.79	-5.28	1.4	-8.04	0.29	-3.56	0.88	-11.61	0.87	-2.12	2.16	6.86	1.54	4.74	2.45	6.27	0.25	-8.07	0.57	-1.8	0.49	0.02	0.01	0	0	0.02	0.01	6.28	0.25	-8.07	0.57	-1.78	0.49	4.16	2.12	-1.2
	200	201	ALA	433	2.71	0.75	10.63	1.34	13.34	1.7	-1.69	0.37	-2.54	0.68	-4.23	0.82	2.42	0.12	-7.42	1.11	-5	1.13	3.44	0.89	0.68	1.47	4.11	1.85	-0.37	0.07	-2.41	0.86	-2.78	0.88	0.03	0.02	0.03	0.02	0.05	0.03	-0.34	0.07	-2.38	0.85	-2.73	0.88	3.1	0.9	-1.71
	201	202	THR	434	6.89	1.55	10.06	1.39	16.94	2.24	-2.8	0.79	-0.89	0.77	-3.69	1.2	-29.4	1.04	-10.41	1.69	-39.82	1.82	-25.32	1.8	-1.25	1.89	-26.57	2.63	3.61	0.38	-4.67	1.08	-1.06	1.13	0.02	0.02	0.04	0.03	0.07	0.03	3.63	0.38	-4.62	1.06	-0.99	1.11	-21.69	1.72	-5.87
	202	203	TYR	435	9.22	2.12	9.91	1.29	19.13	2.82	-3.24	0.86	-2.33	0.71	-5.57	1.25	-18.61	0.79	-4.46	1.11	-23.07	1.29	-12.63	2.42	3.11	1.95	-9.52	3.35	-1.99	0.6	-4.09	0.88	-6.09	1.04	0.14	0.04	0.04	0.01	0.18	0.04	-1.85	0.6	-4.05	0.87	-5.91	1.04	-14.48	2.32	-0.94
	203	204	GLY	436	0	0	11	1.47	11	1.47	0	0	-2.55	0.92	-2.55	0.92	0	0	-17.03	1.86	-17.03	1.86	0	0	-8.58	2.04	-8.58	2.04	0	0	2.19	0.86	2.19	0.86	0	0	0.02	0.01	0.02	0.01	0	0	2.21	0.85	2.21	0.85	0	0	-6.38
	204	205	MET	437	6.99	1.76	9.86	1.3	16.84	2.36	-2.6	0.66	-1.49	0.78	-4.09	1.05	-1.79	0.69	-0.54	0.81	-2.32	1.18	2.6	1.94	7.83	1.45	10.43	2.59	0.97	0.63	-8.75	0.55	-7.78	0.88	0.75	0.08	0.03	0.01	0.78	0.08	1.72	0.61	-8.72	0.55	-7	0.87	4.32	1.88	-0.89
	205	206	SER	438	3.65	0.84	11.71	1.27	15.36	1.75	-1.02	0.44	-0.28	0.65	-1.29	0.85	-2.52	1.92	5.88	1.19	3.36	2.61	0.12	2.1	17.31	1.65	17.43	2.94	-2.26	1.55	-8.02	0.86	-10.28	1.87	0.35	0.04	0.07	0.02	0.42	0.05	-1.91	1.54	-7.95	0.86	-9.86	1.86	-1.79	1.22	9.36
	206	207	PRO	439	12.49	1.51	13.44	1.27	25.93	1.99	-4.19	0.7	-2.75	0.72	-6.93	1	-12.35	0.93	1.79	2.21	-10.56	1.87	-4.04	1.89	12.48	2.34	8.44	2.62	11.63	0.82	-10.71	1.66	0.92	1.3	0.01	0.01	0	0	0.01	0.01	11.64	0.82	-10.71	1.66	0.93	1.29	7.6	1.62	1.77
	207	208	TYR	440	9.14	2.02	13.01	1.47	22.15	2.72	-4.08	0.85	-0.52	0.78	-4.6	1.2	-20.5	1.42	3.3	1.35	-17.2	1.5	-15.43	2.32	15.78	2.01	0.35	2.84	-0.06	0.5	-3.95	1.01	-4.01	0.94	0.02	0.01	0.02	0.01	0.04	0.01	-0.04	0.5	-3.93	1	-3.96	0.94	-15.47	2.2	11.85
	208	209	PRO	441	12.14	1.41	12.53	1.24	24.68	2.06	-2.06	0.5	-0.63	0.7	-2.69	0.88	-12.74	1.03	8.99	1.54	-3.75	1.14	-2.66	1.85	20.9	1.95	18.24	2.11	11.96	0.97	-16.97	1.35	-5.02	0.91	0.31	0.07	0.09	0.02	0.4	0.07	12.27	0.93	-16.88	1.34	-4.61	0.9	9.61	1.48	4.02
	209	210	GLY	442	0	0	10.12	1.61	10.12	1.61	0	0	-0.58	0.5	-0.58	0.5	0	0	-5.35	0.79	-5.35	0.79	0	0	4.19	1.6	4.19	1.6	0	0	-7.37	0.47	-7.37	0.47	0	0	0.7	0.02	0.7	0.02	0	0	-6.67	0.47	-6.67	0.47	0	0	-2.48
	210	211	ILE	443	10.45	2.21	10.19	1.42	20.64	2.84	-2.53	0.98	1.27	0.9	-1.27	1.42	-7.77	0.38	-3.97	0.82	-11.74	0.93	0.15	2.35	7.49	1.67	7.63	3.12	5.56	0.33	-8.76	0.74	-3.2	0.78	0.16	0.06	0.14	0.04	0.31	0.06	5.72	0.33	-8.62	0.74	-2.9	0.77	5.87	2.32	-1.13
	211	212	ASP	444	4.56	1.71	10.54	1.43	15.09	2.45	-0.54	1.14	-1.05	0.79	-1.59	1.48	16.04	5.73	1.09	1.51	17.13	6.04	20.06	5.31	10.57	2.02	30.63	5.77	-82.52	4.79	-11.68	0.96	-94.2	5.05	0.49	0.06	0.09	0.03	0.58	0.06	-82.03	4.76	-11.59	0.95	-93.62	5.02	-61.97	1.73	-1.01
	212	213	LEU	445	8.75	1.74	11.12	1.54	19.87	2.66	-1.49	0.95	-0.64	0.75	-2.13	1.34	-27.27	0.52	-0.84	0.88	-28.11	0.97	-20.01	2.03	9.65	1.77	-10.37	2.8	3.67	0.32	-7.29	0.65	-3.62	0.67	0.35	0.08	0.09	0.03	0.44	0.08	4.03	0.31	-7.2	0.63	-3.18	0.66	-15.99	2.02	2.44
	213	214	SER	446	3.6	1.1	10.14	1.59	13.74	2.17	0.04	0.83	0.49	0.78	0.53	1.2	-8.13	2.67	-7.82	1.44	-15.94	2.78	-4.49	2.37	2.82	1.95	-1.67	2.73	0.83	1.43	-7.1	1.24	-6.27	1.65	0.48	0.06	0.28	0.04	0.76	0.06	1.3	1.39	-6.81	1.23	-5.51	1.63	-3.18	1.45	-4
	214	215	GLN	447	13.44	2.18	10.04	1.51	23.48	2.81	-1.36	0.85	-0.17	0.91	-1.53	1.4	-67.2	3.64	-4.94	1.92	-72.14	4.44	-55.12	3.62	4.93	2.13	-50.18	4.52	-7.93	2.66	-3.83	1.08	-11.77	3.17	0.67	0.09	0.03	0.02	0.7	0.11	-7.26	2.61	-3.81	1.07	-11.07	3.1	-62.38	1.86	1.13
	215	216	VAL	448	6.53	1.72	11.72	1.64	18.25	2.66	-2.61	0.8	-0.89	0.89	-3.51	1.32	-21.12	0.44	-5.93	0.93	-27.04	1.03	-17.2	1.72	4.9	1.62	-12.3	2.53	6.39	0.31	-8.21	0.5	-1.82	0.47	0.02	0.02	0	0	0.02	0.02	6.41	0.31	-8.21	0.5	-1.8	0.47	-10.79	1.69	-3.31
	216	217	TYR	449	8.64	2.3	11.04	1.24	19.68	2.69	-2.09	0.81	-1.99	0.87	-4.08	1.2	-19.95	2.45	-7.33	1.17	-27.28	3.21	-13.39	3.18	1.72	1.57	-11.67	3.63	-1.3	1.73	-5.11	1.01	-6.41	2.41	0.41	0.1	0.02	0.01	0.42	0.1	-0.89	1.66	-5.1	1.01	-5.99	2.34	-14.29	2.34	-3.37
	217	218	GLU	450	5.99	1.64	10.82	1.64	16.82	2.33	-1.2	0.68	-1.56	0.77	-2.76	1.05	41.96	9.01	0.76	2.19	42.72	10.01	46.75	9.15	10.02	2.84	56.77	10.24	-104.81	8.96	-9.97	1.71	-114.78	9.78	0.71	0.09	0.02	0.02	0.73	0.09	-104.1	8.91	-9.95	1.7	-114.05	9.72	-57.35	1.55	0.07
	218	219	LEU	451	9.09	1.97	11.63	1.36	20.72	2.75	-2.11	0.83	-1.82	0.81	-3.94	1.24	-28.26	0.48	0.15	1.21	-28.11	1.26	-21.28	2.09	9.96	1.81	-11.32	2.9	4.49	0.31	-7.21	0.7	-2.72	0.64	0.34	0.08	0	0	0.34	0.08	4.82	0.32	-7.21	0.7	-2.38	0.65	-16.46	2.06	2.75
	219	220	LEU	452	8.79	1.74	11.4	1.19	20.2	2.16	-3.56	1.09	-2.32	0.93	-5.88	1.46	-28.07	0.44	-8.56	1.75	-36.64	1.75	-22.84	2.03	0.52	1.95	-22.32	2.81	4.4	0.23	-5.96	0.95	-1.56	0.9	0.01	0.01	0.01	0.01	0.02	0.02	4.41	0.24	-5.95	0.94	-1.54	0.89	-18.42	2	-5.43
	220	221	GLU	453	6.48	1.8	11.07	1.28	17.56	2.38	-2.08	0.63	-1.01	0.85	-3.09	1.1	41.46	5.75	3.79	1.37	45.24	6.28	45.86	6.34	13.86	1.74	59.72	7.11	-103.6	5.95	-12.04	1.06	-115.64	6.29	0.6	0.09	0.16	0.03	0.76	0.09	-103	5.9	-11.88	1.06	-114.88	6.24	-57.14	1.66	1.98
	221	222	LYS	454	11.77	2.41	10.9	1.75	22.67	3.01	-0.14	0.78	0.16	0.84	0.02	1.13	-53.32	9.92	-7.82	1.29	-61.14	9.44	-41.69	10.78	3.24	2	-38.45	10.37	25.39	10.29	-4.58	1.05	20.82	9.7	1.07	0.14	0.18	0.05	1.25	0.11	26.47	10.18	-4.4	1.03	22.07	9.61	-15.22	2.62	-1.16
	222	223	ASP	455	4.4	1.39	11.9	1.44	16.31	2.15	-0.49	0.52	-0.38	0.62	-0.87	0.93	31.3	4.03	-3.14	1.71	28.16	4.57	35.21	4.64	8.39	1.99	43.59	5.42	-96.23	4.32	-15.28	1.3	-111.51	4.85	0.69	0.08	0.1	0.03	0.79	0.08	-95.53	4.27	-15.18	1.29	-110.72	4.8	-60.33	1.31	-6.8
	223	224	TYR	456	9.13	2.02	10.27	1.24	19.41	2.47	-3.35	0.72	0.09	1.02	-3.27	1.36	-20.08	0.97	-2.94	1.14	-23.02	1.67	-14.3	2.29	7.42	1.59	-6.88	2.97	-1.06	0.67	-2.61	0.72	-3.67	1.08	0.33	0.05	0.06	0.01	0.39	0.06	-0.73	0.64	-2.56	0.71	-3.28	1.05	-15.02	2.18	4.86
	224	225	ARG	457	13.46	2.79	10.15	1.22	23.61	3.09	-5.72	1.18	-0.9	0.68	-6.62	1.46	-243.86	4.77	-0.14	0.75	-244	4.71	-236.12	5.67	9.11	1.54	-227.01	5.85	56.98	4.38	-7.26	0.58	49.72	4.31	0.16	0.06	0.13	0.02	0.29	0.07	57.13	4.37	-7.13	0.57	50	4.29	-178.98	2.63	1.98
	225	226	MET	458	6.7	1.72	9.85	1.3	16.55	2.16	-6.68	0.77	-1.46	0.69	-8.14	1.08	-3.48	0.4	-9.52	0.82	-13	0.86	-3.45	1.85	-1.13	1.52	-4.58	2.53	2.68	0.24	-6.21	0.69	-3.53	0.7	0.01	0.01	0.02	0.01	0.03	0.02	2.68	0.24	-6.19	0.69	-3.51	0.69	-0.77	1.83	-7.32
	226	227	GLU	459	6.01	1.63	10.03	1.24	16.05	2.1	-0.88	0.58	-0.47	0.87	-1.35	1.09	45.89	2.68	6.27	1.08	52.15	2.94	51.02	3.24	15.83	1.56	66.85	3.61	-108.5	2.78	-10.05	0.74	-118.55	2.97	0.84	0.08	0.07	0.03	0.91	0.07	-107.66	2.76	-9.98	0.74	-117.64	2.95	-56.64	1.64	5.85
	227	228	ARG	460	12.65	2.61	11.76	1.26	24.41	2.99	-3.52	1.19	-0.05	0.7	-3.57	1.55	-244.54	9.01	12.86	1.13	-231.68	9.03	-235.41	9.06	24.58	1.59	-210.83	9.25	54.84	7.6	-9.98	0.87	44.86	7.56	0.62	0.06	0.14	0.03	0.75	0.06	55.45	7.56	-9.84	0.88	45.61	7.52	-179.96	2.75	14.74
	228	229	PRO	461	12.11	1.36	13.11	1.07	25.22	1.82	-3.85	0.68	-1.48	0.62	-5.32	0.88	-13.88	0.77	-0.42	1.3	-14.3	1.2	-5.62	1.57	11.22	1.62	5.6	2.26	13.02	0.68	-12.84	1.13	0.18	0.95	0	0.01	0.04	0.02	0.05	0.02	13.03	0.68	-12.8	1.13	0.23	0.94	7.41	1.39	-1.58
	229	230	GLU	462	6.08	1.7	9	1.22	15.08	2.16	-0.18	0.59	-0.03	0.75	-0.21	1.09	39.8	4.8	4.94	1.99	44.74	5.84	45.7	5.22	13.92	2.33	59.62	6.56	-103.41	5.03	-13.82	1.79	-117.23	6.07	1	0.08	0.14	0.05	1.14	0.1	-102.41	5.02	-13.68	1.76	-116.09	6.04	-56.71	1.63	0.24
	230	231	GLY	463	0	0	9.37	1.37	9.37	1.37	0	0	-0.89	0.52	-0.89	0.52	0	0	-7.89	2.08	-7.89	2.08	0	0	0.59	2.26	0.59	2.26	0	0	-5.05	1.5	-5.05	1.5	0	0	0.48	0.07	0.48	0.07	0	0	-4.57	1.46	-4.57	1.46	0	0	-3.98
	231	232	CYS	464	3.46	1.01	11.43	1.49	14.89	1.87	-3.66	0.47	0.48	0.76	-3.18	0.86	6.55	0.61	-3.51	1.96	3.04	1.85	6.35	1.24	8.4	2.2	14.75	2.49	-1.69	0.25	1.39	0.94	-0.3	0.94	0.01	0.01	0.05	0.02	0.06	0.03	-1.68	0.25	1.44	0.93	-0.25	0.93	4.66	1.17	9.84
	232	233	PRO	465	12.15	1.25	13.21	1.25	25.36	2.02	-2.18	0.62	-1.67	0.71	-3.85	0.9	-11.47	1.07	3.25	1.4	-8.22	1.19	-1.5	1.76	14.8	1.89	13.29	2.58	11.03	1	-14.23	0.99	-3.2	0.9	0.27	0.09	0.07	0.02	0.35	0.09	11.31	1.04	-14.16	0.99	-2.85	0.93	9.8	1.43	0.64
	233	234	GLU	466	6.72	1.94	11.65	1.53	18.38	2.65	-0.35	1.2	-1.43	0.78	-1.77	1.5	22.11	7.42	6.16	1.71	28.26	7.59	28.49	7.22	16.38	1.88	44.87	7.33	-85.8	7.04	-12.02	1.39	-97.82	7.17	0.72	0.09	0.06	0.01	0.78	0.08	-85.08	7.01	-11.96	1.38	-97.05	7.15	-56.6	2.02	4.42
	234	235	LYS	467	11.45	2.38	11	1.47	22.45	2.98	-1.22	0.75	-1.36	0.68	-2.57	1.07	-62.83	7.84	-0.63	1.28	-63.47	7.96	-52.6	8.36	9.01	1.7	-43.59	8.59	35.88	8.06	-6.88	0.95	29.01	8.2	0.9	0.14	0.04	0.02	0.94	0.14	36.78	7.96	-6.83	0.95	29.95	8.1	-15.82	2.7	2.18
	235	236	VAL	468	6.17	1.65	11.1	1.41	17.26	2.34	-2.44	0.8	-1.5	0.76	-3.94	1.25	-21.9	0.45	-8.89	0.93	-30.78	0.96	-18.17	1.78	0.71	1.65	-17.46	2.58	6.76	0.34	-9.11	0.6	-2.35	0.56	0.05	0.03	0	0	0.05	0.03	6.81	0.33	-9.11	0.6	-2.3	0.55	-11.36	1.78	-8.4
	236	237	TYR	469	8.77	2.13	10.97	1.13	19.74	2.55	-4.3	0.66	-2.68	0.72	-6.99	1.07	-19.13	0.87	-11.53	0.83	-30.66	1.21	-14.66	2.34	-3.25	1.14	-17.91	2.66	-2.36	0.65	-2.24	0.53	-4.6	0.86	0.31	0.06	0	0	0.31	0.06	-2.06	0.63	-2.24	0.53	-4.3	0.84	-16.72	2.23	-5.48
	237	238	GLU	470	6.36	1.94	10.88	1.29	17.24	2.64	-1.48	0.62	-1.56	0.79	-3.04	1.01	48.24	4.73	-0.13	1.55	48.11	5.21	53.12	5.37	9.19	1.62	62.3	6.16	-110.38	5.02	-10.19	1.13	-120.57	5.31	0.77	0.07	0.03	0.02	0.8	0.07	-109.62	4.99	-10.16	1.12	-119.78	5.27	-56.5	1.64	-0.97
	238	239	LEU	471	9.12	1.94	11.75	1.47	20.87	2.64	-2.84	0.92	-1.67	0.95	-4.52	1.47	-29.41	0.43	-2.64	1.32	-32.05	1.32	-23.13	2.24	7.43	1.72	-15.7	3.12	5.45	0.3	-6.74	0.53	-1.29	0.47	0.11	0.03	0.02	0.01	0.13	0.03	5.56	0.29	-6.72	0.53	-1.16	0.47	-17.57	2.23	0.71
	239	240	MET	472	7.68	1.71	11.91	1.4	19.59	2.15	-7.53	0.71	-3.52	0.7	-11.06	1.07	-3.73	0.43	-0.24	0.92	-3.97	0.99	-3.58	1.84	8.14	1.53	4.56	2.16	3.67	0.35	-4.52	0.47	-0.85	0.55	0	0	0	0	0	0	3.67	0.35	-4.52	0.47	-0.85	0.55	0.09	1.75	3.62
	240	241	ARG	473	13.06	2.48	11.58	1.45	24.64	2.93	-3.91	0.85	-2.66	0.65	-6.57	1.05	-229.17	4.61	-6.22	1.3	-235.4	4.7	-220.02	5.29	2.7	1.58	-217.33	5.38	44.39	4.46	-3.82	0.92	40.56	4.54	0.72	0.1	0.02	0.01	0.74	0.1	45.11	4.42	-3.8	0.91	41.31	4.49	-174.92	2.33	-1.1
	241	242	ALA	474	2.77	0.89	10.96	1.21	13.74	1.69	-1.3	0.31	-2.52	0.69	-3.82	0.77	2.27	0.12	-13.62	1.03	-11.35	1.05	3.74	0.95	-5.17	1.25	-1.43	1.8	-0.16	0.07	-0.06	0.64	-0.21	0.66	0.19	0.03	0.04	0.02	0.23	0.03	0.04	0.07	-0.02	0.63	0.01	0.64	3.78	0.94	-5.2
	242	243	CYS	475	3.28	1.12	10.49	1.41	13.77	1.94	-3.73	0.61	-3.57	0.81	-7.29	0.98	6.24	0.68	-9.59	0.88	-3.35	1.18	5.79	1.33	-2.66	1.56	3.13	2.34	-2.18	0.31	1.52	0.42	-0.66	0.57	0	0	0	0	0	0	-2.18	0.31	1.52	0.42	-0.66	0.57	3.61	1.28	-1.14
	243	244	TRP	476	11.46	2.35	10.29	1.29	21.75	2.76	-10.51	0.69	-1.22	0.9	-11.73	1.22	6.81	0.63	-13.2	1.97	-6.38	2.02	7.76	2.6	-4.13	1.92	3.63	3.33	1.25	0.37	-0.1	0.6	1.15	0.7	0.01	0.01	0	0	0.02	0.01	1.26	0.37	-0.1	0.6	1.16	0.7	9.02	2.56	-4.22
	244	245	GLN	477	13.82	2.01	9.85	1.03	23.67	2.19	-2.96	0.82	-1.41	0.77	-4.37	1.25	-74.49	2.55	-7.85	1.03	-82.35	2.62	-63.64	2.78	0.59	1.39	-63.04	2.94	-1.7	1.62	-1.92	0.47	-3.62	1.67	0.52	0.04	0	0.01	0.53	0.04	-1.18	1.62	-1.92	0.47	-3.1	1.67	-64.81	1.93	-1.33
	245	246	TRP	478	10.95	2.17	11.64	1.22	22.59	2.69	-4.37	0.81	-2.27	0.63	-6.64	1.09	9.48	1.04	-5.87	1.41	3.61	1.9	16.07	2.37	3.5	1.56	19.56	2.96	-4.33	1.06	-4.68	0.74	-9	1.39	0.63	0.07	0.05	0.01	0.68	0.07	-3.7	1.01	-4.63	0.73	-8.32	1.35	12.37	2.3	-1.13
	246	247	ASN	479	11.09	1.66	11.72	1.01	22.82	2.04	-2.03	0.52	-0.6	0.7	-2.62	1.04	-81.08	2.92	4.01	1.53	-77.07	4.03	-72.01	3.19	15.13	1.61	-56.88	4.16	-5.33	2.63	-5.26	0.97	-10.59	3.34	0.56	0.03	0.05	0.01	0.61	0.04	-4.77	2.61	-5.21	0.98	-9.98	3.33	-76.79	1.48	9.93
	247	248	PRO	480	12.17	1.53	14.42	1.38	26.59	2.18	-2.93	0.57	-2.9	0.65	-5.83	0.83	-7.33	1.08	3.78	2.96	-3.55	2.85	1.91	2.15	15.3	3.1	17.21	3.66	7.02	1	-13.4	2.04	-6.38	1.95	0.27	0.04	0	0	0.27	0.04	7.28	1.01	-13.39	2.04	-6.11	1.96	9.19	1.71	1.91
	248	249	SER	481	3.63	0.93	10.12	1.29	13.75	1.63	-0.64	0.45	-0.46	0.64	-1.1	0.91	-5.66	2.3	-4.89	1.52	-10.55	2.12	-2.67	2.3	4.77	1.78	2.1	2.37	-0.07	1.37	-10.51	1.26	-10.58	1.28	0.41	0.05	0.2	0.03	0.61	0.05	0.34	1.34	-10.31	1.26	-9.97	1.27	-2.33	1.39	-5.54
	249	250	ASP	482	4.59	1.3	9.77	1.37	14.37	1.76	-1.12	0.75	-0.56	0.69	-1.67	1.12	31.56	4.97	11.43	1.15	42.99	5.6	35.04	4.83	20.65	1.62	55.68	5.66	-97.03	4.78	-18.01	1.15	-115.03	5.39	0.46	0.04	0.15	0.02	0.62	0.04	-96.56	4.76	-17.85	1.14	-114.42	5.37	-61.53	1.32	2.79
	250	251	ARG	483	13.01	2.74	10.77	1.46	23.79	3.35	-7.35	1.36	0.14	0.8	-7.21	1.62	-256.77	4.96	8.93	2.35	-247.83	4.33	-251.11	5.05	19.85	2.8	-231.26	4.76	61.23	4.13	-7.08	1.96	54.15	3.47	0	0	0.09	0.03	0.09	0.04	61.23	4.13	-6.99	1.94	54.24	3.48	-189.88	2.5	12.86
	251	252	PRO	484	12.42	1.58	12.7	1.03	25.12	1.95	-3.31	0.58	-1.58	0.63	-4.89	0.9	-17.54	1.25	6.55	1.43	-10.99	0.91	-8.43	2.18	17.67	1.85	9.24	2.4	16.91	1.18	-17.41	1.18	-0.5	0.58	0.12	0.04	0.04	0.02	0.17	0.05	17.03	1.17	-17.37	1.18	-0.34	0.56	8.6	1.76	0.3
	252	253	SER	485	3.39	0.95	9.85	1.3	13.24	1.89	-1.04	0.94	-1.26	0.98	-2.29	1.47	-8.92	3.66	-7.96	1.7	-16.88	4.93	-6.57	3.43	0.64	1.89	-5.93	4.62	2.73	2.41	-5.47	0.79	-2.73	2.96	0.24	0.04	0.03	0.02	0.27	0.05	2.98	2.39	-5.44	0.79	-2.46	2.94	-3.59	1.5	-4.8
	253	254	PHE	486	8.37	2.1	11.1	1.45	19.47	2.69	-5.62	0.67	-2.17	0.99	-7.79	1.17	-0.46	0.27	-10.44	1.28	-10.9	1.32	2.28	2.31	-1.51	1.59	0.77	2.88	0.88	0.2	-1.99	0.71	-1.11	0.71	0.01	0.01	0	0	0.01	0.01	0.89	0.2	-1.99	0.71	-1.1	0.71	3.17	2.33	-3.5
	254	255	ALA	487	2.79	0.9	11.15	1.58	13.94	1.89	-1.11	0.23	-2.01	0.75	-3.12	0.79	2.36	0.18	-11.27	1.74	-8.91	1.82	4.04	0.95	-2.13	2.09	1.91	2.51	-0.43	0.12	-0.62	1.05	-1.05	1.14	0.24	0.04	0.01	0.01	0.25	0.05	-0.19	0.13	-0.61	1.05	-0.8	1.14	3.85	0.92	-2.74
	255	256	GLU	488	5.89	1.74	11.13	1.45	17.03	2.41	-1.39	1.1	-1.73	0.84	-3.12	1.47	48.76	7.42	2.39	1.33	51.15	8.03	53.27	7	11.79	1.99	65.06	7.94	-110.96	6.71	-12.44	1.05	-123.39	7.35	0.68	0.04	0.04	0.02	0.72	0.04	-110.28	6.69	-12.4	1.05	-122.68	7.34	-57.01	1.94	-0.61
	256	257	ILE	489	9.53	2	11.61	1.3	21.14	2.59	-3.71	1	-1.23	0.88	-4.94	1.32	-8.85	0.36	-1.6	1.25	-10.45	1.33	-3.02	2.17	8.78	1.65	5.75	2.78	7.24	0.33	-8.31	0.66	-1.07	0.64	0	0	0	0	0	0	7.24	0.33	-8.31	0.66	-1.07	0.64	4.21	2.19	0.47
	257	258	HIS	490	25.34	2.04	11.12	1.22	36.46	2.49	-5.78	0.99	-2.48	0.82	-8.26	1.32	-8.14	2.76	-8.09	1.47	-16.24	3.62	11.42	3.73	0.55	1.73	11.97	4.65	-6.59	2.43	-5.42	1.11	-12.01	3.17	0.38	0.11	0.01	0.01	0.38	0.12	-6.22	2.35	-5.41	1.11	-11.63	3.08	5.2	2.3	-4.86
	258	259	GLN	491	13.97	2.27	10.99	1.47	24.96	3.1	-1.42	0.75	-1.22	0.9	-2.64	1.14	-68.53	3.35	-8.65	1.9	-77.18	3.96	-55.98	3.55	1.12	1.97	-54.86	4.48	-6.1	2.5	-4.56	0.96	-10.67	2.77	0.79	0.08	0.03	0.03	0.82	0.1	-5.32	2.44	-4.53	0.95	-9.85	2.7	-61.3	2.21	-3.41
	259	260	ALA	492	2.79	0.9	11.14	1.39	13.93	1.81	-1.29	0.35	-1.65	0.81	-2.94	0.89	2.4	0.14	-8.48	1.77	-6.08	1.81	3.9	0.96	1	2.2	4.9	2.58	-0.32	0.07	-0.79	0.96	-1.11	0.99	0.14	0.05	0.07	0.03	0.21	0.05	-0.18	0.08	-0.71	0.95	-0.89	0.98	3.72	0.94	0.29
	260	261	PHE	493	8.21	2.07	11.44	1.35	19.65	2.54	-4.5	0.77	-1.96	0.77	-6.46	1.1	-0.18	0.49	-8.01	1.23	-8.19	1.36	3.54	2.26	1.47	1.67	5.01	2.87	0.82	0.27	-4.45	1.11	-3.62	1.13	0.01	0.02	0.06	0.04	0.08	0.05	0.84	0.27	-4.38	1.1	-3.54	1.11	4.38	2.26	-2.91
	261	262	GLU	494	6.59	1.84	10.36	1.26	16.94	2.44	-1.29	0.79	-0.45	0.75	-1.74	1.26	57.13	3.86	3.32	1.49	60.45	4.58	62.43	4.48	13.23	1.91	75.65	5.32	-119.5	4.2	-15.44	1.23	-134.94	4.62	0.76	0.12	0.13	0.05	0.89	0.1	-118.74	4.14	-15.31	1.24	-134.06	4.57	-56.32	1.65	-2.08
	262	263	THR	495	6.34	1.54	10.24	1.36	16.58	2.21	-0.22	0.75	0.58	0.75	0.36	1.2	-27.32	2.44	-9.82	3.9	-37.14	3.75	-21.2	2.86	0.99	4.07	-20.21	4.18	2.47	1.98	-5.69	3.3	-3.22	3.11	0.56	0.06	0.12	0.08	0.67	0.12	3.03	1.97	-5.57	3.24	-2.54	3.03	-18.18	1.63	-4.58
	263	264	MET	496	7.71	1.73	10.59	1.48	18.3	2.6	-4.85	0.94	-0.35	0.74	-5.2	1.22	-5.14	0.9	2.73	3.3	-2.41	3.61	-2.28	1.96	12.96	3.21	10.68	4.12	4.52	0.71	-8.35	2.71	-3.83	2.98	0.1	0.07	0.14	0.05	0.23	0.09	4.61	0.7	-8.21	2.7	-3.6	2.96	2.34	1.93	4.75
	264	265	PHE	497	8.38	1.97	6.47	1.44	14.85	2.82	1.37	0.83	0.25	0.53	1.62	1.03	66.26	11.48	-9.27	4.85	56.99	6.86	76	11.69	-2.54	5.18	73.46	7.15	-199.59	11.13	69.49	4.61	-130.1	6.62	1.64	0.17	0.08	0.03	1.72	0.16	-197.94	11.15	69.57	4.61	-128.38	6.64	-121.94	2.39	67.03
=>>	LIGAND
	Number	Residue	Residue Name	Residue ID	SINT		BINT		TINT		SVDW		BVDW		TVDW		SELE		BELE		TELE		SGAS		BGAS		TGAS		SGB		BGB		TGB		SGBSUR		BGBSUR		TGBSUR		SGBSOL		BGBSOL		TGBSOL		SGBTOT		BGBTOT
	0	266	LIG	498	23.49	3.14	0	0	23.49	3.14	1.71	1.42	0	0	1.71	1.42	53.11	1.38	0	0	53.11	1.38	78.31	3.43	0	0	78.31	3.43	-61.85	1.17	0	0	-61.85	1.17	2.71	0.03	0	0	2.71	0.03	-59.14	1.16	0	0	-59.14	1.16	19.17	3.37	0
=>>	DELTA
	Number	Residue	Residue Name	Residue ID	SINT		BINT		TINT		SVDW		BVDW		TVDW		SELE		BELE		TELE		SGAS		BGAS		TGAS		SGB		BGB		TGB		SGBSUR		BGBSUR		TGBSUR		SGBSOL		BGBSOL		TGBSOL		SGBTOT		BGBTOT
	0	1	ASP	233	0	0	0	0	0	0	0	0	0	0	0	0	-0.59	0.36	0.02	0.03	-0.57	0.34	-0.59	0.36	0.02	0.03	-0.57	0.34	0.58	0.35	-0.02	0.03	0.56	0.34	0	0	0	0	0	0	0.58	0.35	-0.02	0.03	0.56	0.34	-0.01	0	0
	1	2	LYS	234	0	0	0	0	0	0	0	0	0	0	0	0	5.46	1.46	-0.13	0.04	5.34	1.44	5.46	1.46	-0.13	0.04	5.34	1.44	-5.39	1.44	0.13	0.04	-5.27	1.42	0	0	0	0	0	0	-5.39	1.44	0.13	0.04	-5.27	1.42	0.07	0.02	0
	2	3	TRP	235	0	0	0	0	0	0	0	0	0	0	0	0	0.14	0.04	-0.24	0.09	-0.1	0.08	0.14	0.04	-0.24	0.09	-0.1	0.08	-0.14	0.04	0.24	0.09	0.1	0.08	0	0	0	0	0	0	-0.14	0.04	0.24	0.09	0.1	0.08	0	0	0
	3	4	GLU	236	0	0	0	0	0	0	0	0	0	0	0	0	-4.73	1.27	-0.57	0.14	-5.31	1.39	-4.73	1.27	-0.57	0.14	-5.31	1.39	4.67	1.25	0.57	0.14	5.24	1.37	0	0	0	0	0	0	4.67	1.25	0.57	0.14	5.24	1.37	-0.06	0.02	-0.01
	4	5	MET	237	0	0	0	0	0	0	0	0	0	0	0	0	0.24	0.05	-0.33	0.11	-0.1	0.07	0.24	0.05	-0.33	0.11	-0.1	0.07	-0.23	0.05	0.33	0.11	0.09	0.07	0	0	0	0	0	0	-0.23	0.05	0.33	0.11	0.09	0.07	0	0	0
	5	6	GLU	238	0	0	0	0	0	0	0	0	0	0	0	0	-4.16	0.91	-0.62	0.16	-4.78	1.06	-4.16	0.91	-0.62	0.16	-4.78	1.06	4.11	0.9	0.62	0.15	4.72	1.05	0	0	0	0	0	0	4.11	0.9	0.62	0.15	4.72	1.05	-0.05	0.01	-0.01
	6	7	ARG	239	0	0	0	0	0	0	0	0	0	0	0	0	5.59	1.37	-0.2	0.05	5.39	1.33	5.59	1.37	-0.2	0.05	5.39	1.33	-5.52	1.35	0.19	0.05	-5.32	1.32	0	0	0	0	0	0	-5.52	1.35	0.19	0.05	-5.32	1.32	0.07	0.02	0
	7	8	THR	240	0	0	0	0	0	0	0	0	0	0	0	0	0.23	0.05	-0.21	0.04	0.01	0.04	0.23	0.05	-0.21	0.04	0.01	0.04	-0.22	0.05	0.21	0.04	-0.01	0.04	0	0	0	0	0	0	-0.22	0.05	0.21	0.04	-0.01	0.04	0	0	0
	8	9	ASP	241	0	0	0	0	0	0	0	0	0	0	0	0	-4.02	0.84	-0.65	0.12	-4.67	0.96	-4.02	0.84	-0.65	0.12	-4.67	0.96	3.97	0.83	0.64	0.12	4.61	0.95	0	0	0	0	0	0	3.97	0.83	0.64	0.12	4.61	0.95	-0.05	0.01	-0.01
	9	10	ILE	242	0	0	0	0	0	0	0	0	0	0	0	0	0.49	0.12	-0.45	0.11	0.04	0.04	0.49	0.12	-0.45	0.11	0.04	0.04	-0.48	0.12	0.44	0.11	-0.04	0.04	0	0	0	0	0	0	-0.48	0.12	0.44	0.11	-0.04	0.04	0.01	0	-0.01
	10	11	THR	243	0	0	0	0	0	0	0	0	0	0	0	0	0.27	0.07	-0.28	0.07	0	0.05	0.27	0.07	-0.28	0.07	0	0.05	-0.27	0.07	0.28	0.07	0	0.05	0	0	0	0	0	0	-0.27	0.07	0.28	0.07	0	0.05	0	0	0
	11	12	MET	244	0	0	0	0	0	0	0	0	0	0	0	0	0.25	0.08	-0.18	0.03	0.07	0.07	0.25	0.08	-0.18	0.03	0.07	0.07	-0.25	0.08	0.18	0.03	-0.07	0.07	0	0	0	0	0	0	-0.25	0.08	0.18	0.03	-0.07	0.07	0	0	0
	12	13	LYS	245	0	0	0	0	0	0	0	0	0	0	0	0	4.88	0.92	-0.08	0.05	4.8	0.93	4.88	0.92	-0.08	0.05	4.8	0.93	-4.82	0.91	0.08	0.05	-4.74	0.92	0	0	0	0	0	0	-4.82	0.91	0.08	0.05	-4.74	0.92	0.06	0.01	0
	13	14	HIS	246	0	0	0	0	0	0	0	0	0	0	0	0	0.24	0.08	-0.22	0.07	0.02	0.03	0.24	0.08	-0.22	0.07	0.02	0.03	-0.24	0.08	0.21	0.07	-0.02	0.03	0	0	0	0	0	0	-0.24	0.08	0.21	0.07	-0.02	0.03	0	0	0
	14	15	LYS	247	0	0	0	0	0	0	0	0	0	0	0	0	6.36	1.6	-0.02	0.05	6.34	1.64	6.36	1.6	-0.02	0.05	6.34	1.64	-6.28	1.58	0.02	0.05	-6.26	1.62	0	0	0	0	0	0	-6.28	1.58	0.02	0.05	-6.26	1.62	0.08	0.02	0
	15	16	LEU	248	0	0	0	0	0	0	0	0	0	0	0	0	0.48	0.14	-0.47	0.12	0.01	0.05	0.48	0.14	-0.47	0.12	0.01	0.05	-0.48	0.14	0.47	0.12	-0.01	0.05	0	0	0	0	0	0	-0.48	0.14	0.47	0.12	-0.01	0.05	0.01	0	-0.01
	16	17	GLY	249	0	0	0	0	0	0	0	0	0	0	0	0	0	0	0	0.03	0	0.03	0	0	0	0.03	0	0.03	0	0	0	0.03	0	0.03	0	0	0	0	0	0	0	0	0	0.03	0	0.03	0	0	0
	17	18	GLY	250	0	0	0	0	0	0	0	0	0	0	0	0	0	0	0.04	0.04	0.04	0.04	0	0	0.04	0.04	0.04	0.04	0	0	-0.04	0.04	-0.04	0.04	0	0	0	0	0	0	0	0	-0.04	0.04	-0.04	0.04	0	0	0
	18	19	GLY	251	0	0	0	0	0	0	0	0	0	0	0	0	0	0	0.01	0.05	0.01	0.05	0	0	0.01	0.05	0.01	0.05	0	0	-0.01	0.05	-0.01	0.05	0	0	0	0	0	0	0	0	-0.01	0.05	-0.01	0.05	0	0	0
	19	20	GLN	252	0	0	0	0	0	0	0	0	0	0	0	0	0.06	0.06	-0.29	0.11	-0.23	0.15	0.06	0.06	-0.29	0.11	-0.23	0.15	-0.06	0.06	0.29	0.11	0.22	0.15	0	0	0	0	0	0	-0.06	0.06	0.29	0.11	0.22	0.15	0	0	0
	20	21	TYR	253	0	0	0	0	0	0	0	0	0	0	0	0	0.31	0.15	-0.01	0.07	0.3	0.21	0.31	0.15	-0.01	0.07	0.3	0.21	-0.31	0.15	0.02	0.06	-0.29	0.21	0	0	0	0	0	0	-0.31	0.15	0.02	0.06	-0.29	0.21	0	0	0
	21	22	GLY	254	0	0	0	0	0	0	0	0	0	0	0	0	0	0	0.19	0.14	0.19	0.14	0	0	0.19	0.14	0.19	0.14	0	0	-0.18	0.14	-0.18	0.14	0	0	0	0	0	0	0	0	-0.18	0.14	-0.18	0.14	0	0	0
	22	23	GLU	255	0	0	0	0	0	0	0	0	0	0	0	0	-8.55	3.24	-0.93	0.31	-9.48	3.54	-8.55	3.24	-0.93	0.31	-9.48	3.54	8.46	3.21	0.92	0.31	9.37	3.51	0	0	0	0	0	0	8.46	3.21	0.92	0.31	9.37	3.51	-0.1	0.03	-0.01
	23	24	VAL	256	0	0	0	0	0	0	0	0	0	0	0	0	0.8	0.27	-0.74	0.23	0.05	0.07	0.8	0.27	-0.74	0.23	0.05	0.07	-0.79	0.27	0.73	0.22	-0.05	0.07	0	0	0	0	0	0	-0.79	0.27	0.73	0.22	-0.05	0.07	0.01	0	-0.01
	24	25	TYR	257	0	0	0	0	0	0	0	0	0	0	0	0	0.11	0.02	-0.28	0.12	-0.17	0.11	0.11	0.02	-0.28	0.12	-0.17	0.11	-0.11	0.02	0.27	0.12	0.16	0.11	0	0	0	0	0	0	-0.11	0.02	0.27	0.12	0.16	0.11	0	0	0
	25	26	GLU	258	0	0	0	0	0	0	0	0	0	0	0	0	-4.49	0.92	-0.71	0.19	-5.2	1.1	-4.49	0.92	-0.71	0.19	-5.2	1.1	4.44	0.91	0.7	0.19	5.14	1.08	0	0	0	0	0	0	4.44	0.91	0.7	0.19	5.14	1.08	-0.06	0.01	-0.01
	26	27	GLY	259	0	0	0	0	0	0	0	0	0	0	0	0	0	0	0	0.03	0	0.03	0	0	0	0.03	0	0.03	0	0	0	0.03	0	0.03	0	0	0	0	0	0	0	0	0	0.03	0	0.03	0	0	0
	27	28	VAL	260	0	0	0	0	0	0	0	0	0	0	0	0	0.51	0.1	-0.56	0.13	-0.04	0.04	0.51	0.1	-0.56	0.13	-0.04	0.04	-0.51	0.1	0.55	0.13	0.04	0.04	0	0	0	0	0	0	-0.51	0.1	0.55	0.13	0.04	0.04	0.01	0	-0.01
	28	29	TRP	261	0	0	0	0	0	0	0	0	0	0	0	0	0.13	0.03	-0.11	0.03	0.02	0.05	0.13	0.03	-0.11	0.03	0.02	0.05	-0.13	0.03	0.11	0.03	-0.02	0.05	0	0	0	0	0	0	-0.13	0.03	0.11	0.03	-0.02	0.05	0	0	0
	29	30	LYS	262	0	0	0	0	0	0	0	0	0	0	0	0	4.67	0.9	-0.06	0.03	4.61	0.91	4.67	0.9	-0.06	0.03	4.61	0.91	-4.61	0.89	0.06	0.03	-4.55	0.9	0	0	0	0	0	0	-4.61	0.89	0.06	0.03	-4.55	0.9	0.06	0.01	0
	30	31	LYS	263	0	0	0	0	0	0	0	0	0	0	0	0	4.66	0.96	-0.05	0.02	4.61	0.97	4.66	0.96	-0.05	0.02	4.61	0.97	-4.6	0.95	0.05	0.02	-4.55	0.96	0	0	0	0	0	0	-4.6	0.95	0.05	0.02	-4.55	0.96	0.06	0.01	0
	31	32	TYR	264	0	0	0	0	0	0	0	0	0	0	0	0	0.1	0.02	-0.1	0.03	0	0.02	0.1	0.02	-0.1	0.03	0	0.02	-0.1	0.02	0.1	0.03	0	0.02	0	0	0	0	0	0	-0.1	0.02	0.1	0.03	0	0.02	0	0	0
	32	33	SER	265	0	0	0	0	0	0	0	0	0	0	0	0	0.24	0.05	-0.21	0.05	0.03	0.04	0.24	0.05	-0.21	0.05	0.03	0.04	-0.23	0.05	0.21	0.05	-0.03	0.04	0	0	0	0	0	0	-0.23	0.05	0.21	0.05	-0.03	0.04	0	0	0
	33	34	LEU	266	0	0	0	0	0	0	0	0	0	0	0	0	0.36	0.07	-0.38	0.09	-0.02	0.04	0.36	0.07	-0.38	0.09	-0.02	0.04	-0.36	0.07	0.37	0.09	0.02	0.04	0	0	0	0	0	0	-0.36	0.07	0.37	0.09	0.02	0.04	0	0	0
	34	35	THR	267	0	0	0	0	0	0	0	0	0	0	0	0	0.29	0.07	-0.27	0.07	0.02	0.03	0.29	0.07	-0.27	0.07	0.02	0.03	-0.28	0.07	0.27	0.07	-0.02	0.03	0	0	0	0	0	0	-0.28	0.07	0.27	0.07	-0.02	0.03	0	0	0
	35	36	VAL	268	0	0	0	0	0	0	0	0	0	0	0	0	0.6	0.15	-0.51	0.1	0.08	0.06	0.6	0.15	-0.51	0.1	0.08	0.06	-0.59	0.15	0.5	0.1	-0.08	0.06	0	0	0	0	0	0	-0.59	0.15	0.5	0.1	-0.08	0.06	0.01	0	-0.01
	36	37	ALA	269	0	0	0	0	0	0	0	0	0	0	0	0	0	0	0.03	0.04	0.02	0.04	0	0	0.03	0.04	0.02	0.04	0	0	-0.03	0.03	-0.02	0.04	0	0	0	0	0	0	0	0	-0.03	0.03	-0.02	0.04	0	0	0
	37	38	VAL	270	0	0	0	0	0	0	0	0	0	0	0	0	0.69	0.21	-0.67	0.19	0.02	0.04	0.69	0.21	-0.67	0.19	0.02	0.04	-0.69	0.2	0.66	0.19	-0.02	0.04	0	0	0	0	0	0	-0.69	0.2	0.66	0.19	-0.02	0.04	0.01	0	-0.01
	38	39	LYS	271	0	0	0	0	0	0	0	0	0	0	0	0	10.52	4.96	-0.09	0.06	10.42	4.96	10.51	4.96	-0.09	0.06	10.42	4.95	-10.38	4.9	0.09	0.06	-10.29	4.89	0	0	0	0	0	0	-10.38	4.9	0.09	0.06	-10.29	4.89	0.13	0.06	0
	39	40	THR	272	0	0	0	0	0	0	0	0	0	0	0	0	0.31	0.1	-0.55	0.24	-0.23	0.15	0.31	0.1	-0.55	0.24	-0.23	0.16	-0.31	0.1	0.54	0.24	0.23	0.15	0	0	0	0	0	0	-0.31	0.1	0.54	0.24	0.23	0.15	0	0	-0.01
	40	41	LEU	273	0	0	0	0	0	0	0	0.01	0	0	0	0.01	0.65	0.23	-0.72	0.27	-0.07	0.09	0.65	0.23	-0.73	0.27	-0.07	0.09	-0.65	0.23	0.72	0.27	0.07	0.09	0	0	0	0	0	0	-0.65	0.23	0.72	0.27	0.07	0.09	0.01	0	-0.01
	41	42	LYS	274	0	0	0	0	0	0	0	0	0	0	0	0	8.06	2.61	-0.11	0.03	7.95	2.59	8.06	2.61	-0.11	0.03	7.95	2.59	-7.96	2.57	0.11	0.03	-7.85	2.55	0	0	0	0	0	0	-7.96	2.57	0.11	0.03	-7.85	2.55	0.11	0.04	0
	42	43	GLU	275	0	0	0	0	0	0	0	0	0	0	0	0	-6.83	2.32	-1.05	0.37	-7.88	2.66	-6.83	2.32	-1.05	0.37	-7.88	2.66	6.75	2.3	1.03	0.36	7.79	2.63	0	0	0	0	0	0	6.75	2.3	1.03	0.36	7.79	2.63	-0.08	0.02	-0.01
	43	44	ASP	276	0	0	0	0	0	0	0	0	0	0	0	0	-5.9	2	-1.12	0.41	-7.02	2.39	-5.9	2	-1.12	0.41	-7.02	2.39	5.83	1.98	1.11	0.41	6.94	2.37	0	0	0	0	0	0	5.83	1.98	1.11	0.41	6.94	2.37	-0.07	0.02	-0.01
	44	45	THR	277	0	0	0	0	0	0	0	0.01	0	0	-0.01	0.01	0.38	0.16	-0.29	0.15	0.09	0.16	0.37	0.16	-0.29	0.15	0.08	0.15	-0.37	0.15	0.29	0.15	-0.08	0.15	0	0.01	0	0	0	0.01	-0.37	0.15	0.29	0.15	-0.08	0.15	0	0.01	0
	45	46	MET	278	0	0	0	0	0	0	-0.01	0.08	-0.01	0.03	-0.02	0.11	0.53	0.38	-0.38	0.25	0.15	0.4	0.51	0.35	-0.39	0.27	0.13	0.39	-0.51	0.37	0.38	0.26	-0.14	0.38	0	0.03	0	0	0	0.03	-0.52	0.38	0.38	0.26	-0.14	0.39	-0.01	0.08	-0.01
	46	47	GLU	279	0	0	0	0	0	0	-0.11	0.3	-0.03	0.07	-0.14	0.35	-11.14	6.05	-1.38	0.65	-12.52	6.59	-11.25	6.25	-1.4	0.68	-12.66	6.82	11.16	6.24	1.38	0.66	12.54	6.8	-0.04	0.1	0	0.01	-0.04	0.1	11.12	6.17	1.38	0.66	12.5	6.72	-0.13	0.22	-0.02
	47	48	VAL	280	0	0	0	0	0	0	0	0	-0.01	0.01	-0.01	0.01	1.01	0.39	-1.18	0.53	-0.17	0.27	1.01	0.39	-1.19	0.53	-0.18	0.26	-1	0.39	1.17	0.52	0.17	0.26	0	0	0	0	0	0	-1	0.39	1.17	0.52	0.17	0.26	0.01	0	-0.02
	48	49	GLU	281	0	0	0	0	0	0	-0.01	0.02	-0.01	0.01	-0.02	0.03	-9.2	3.97	-1.52	0.93	-10.71	4.71	-9.21	3.98	-1.53	0.93	-10.73	4.73	9.11	3.95	1.51	0.93	10.62	4.69	0	0	0	0	0	0	9.11	3.94	1.51	0.93	10.62	4.68	-0.1	0.04	-0.02
	49	50	GLU	282	0	0	0	0	0	0	-0.18	0.3	-0.04	0.06	-0.22	0.34	-15.04	7.95	-1.98	1.34	-17.01	8.82	-15.22	8.13	-2.02	1.37	-17.24	9.02	15.26	8.31	2.01	1.38	17.27	9.19	-0.07	0.1	-0.01	0.02	-0.08	0.1	15.19	8.24	2	1.37	17.2	9.11	-0.02	0.3	-0.01
	50	51	PHE	283	0	0	0	0	0	0	-0.01	0.01	-0.01	0.01	-0.02	0.02	0.17	0.06	-0.43	0.45	-0.26	0.43	0.16	0.06	-0.44	0.46	-0.28	0.44	-0.16	0.06	0.43	0.45	0.27	0.43	0	0	0	0	0	0	-0.16	0.06	0.43	0.45	0.27	0.43	0	0	-0.01
	51	52	LEU	284	0	0	0	0	0	0	0	0	0	0.01	-0.01	0.01	0.69	0.27	-0.55	0.25	0.14	0.16	0.68	0.27	-0.55	0.25	0.13	0.16	-0.68	0.26	0.55	0.25	-0.13	0.16	0	0	0	0	0	0	-0.68	0.26	0.55	0.25	-0.13	0.16	0.01	0	-0.01
	52	53	LYS	285	0	0	0	0	0	0	-0.07	0.15	-0.01	0.02	-0.09	0.16	14.64	7.84	0.05	0.18	14.69	7.91	14.56	7.75	0.04	0.17	14.6	7.81	-14.36	7.64	-0.05	0.18	-14.41	7.7	-0.03	0.07	0	0	-0.03	0.07	-14.39	7.68	-0.05	0.18	-14.44	7.74	0.17	0.17	-0.01
	53	54	GLU	286	0	0	0	0	0	0	-0.01	0.02	-0.01	0.01	-0.03	0.03	-9.99	5.08	-1.02	0.46	-11.01	5.5	-10	5.09	-1.03	0.48	-11.03	5.53	9.91	5.07	1.01	0.46	10.92	5.49	0	0.01	0	0	0	0.01	9.91	5.06	1.01	0.46	10.92	5.49	-0.09	0.04	-0.02
	54	55	ALA	287	0	0	0	0	0	0	0	0	0	0	0	0	-0.03	0.02	0.21	0.14	0.18	0.13	-0.03	0.02	0.21	0.14	0.18	0.13	0.03	0.02	-0.2	0.14	-0.17	0.12	0	0	0	0	0	0	0.03	0.02	-0.2	0.14	-0.17	0.12	0	0	0.01
	55	56	ALA	288	0	0	0	0	0	0	0	0	0	0	0	0	0	0.01	0.34	0.26	0.34	0.26	0	0.01	0.34	0.26	0.33	0.26	0	0.01	-0.33	0.25	-0.33	0.25	0	0	0	0	0	0	0	0.01	-0.33	0.25	-0.33	0.25	0	0	0
	56	57	VAL	289	0	0	0	0	0	0	-0.01	0.02	0	0	-0.02	0.02	1.08	0.55	-0.67	0.22	0.41	0.35	1.07	0.54	-0.68	0.23	0.4	0.33	-1.07	0.55	0.66	0.22	-0.41	0.34	0	0.01	0	0	0	0.01	-1.07	0.55	0.66	0.22	-0.41	0.35	0	0.02	-0.01
	57	58	MET	290	0	0	0	0	0	0	0	0	0	0	0	0	0.46	0.25	-0.21	0.05	0.24	0.23	0.45	0.25	-0.21	0.05	0.24	0.23	-0.45	0.25	0.21	0.05	-0.23	0.22	0	0	0	0	0	0	-0.45	0.25	0.21	0.05	-0.23	0.22	0.01	0	0
	58	59	LYS	291	0	0	0	0	0	0	0	0	0	0	0	0	7.19	2.5	0.02	0.09	7.21	2.58	7.19	2.5	0.02	0.09	7.21	2.58	-7.09	2.47	-0.02	0.09	-7.11	2.55	0	0	0	0	0	0	-7.09	2.47	-0.02	0.09	-7.11	2.55	0.09	0.03	0
	59	60	GLU	292	0	0	0	0	0	0	0	0	0	0	0	0	-5.96	2.11	-0.65	0.17	-6.61	2.28	-5.96	2.12	-0.65	0.17	-6.61	2.28	5.89	2.09	0.64	0.17	6.53	2.26	0	0	0	0	0	0	5.89	2.09	0.64	0.17	6.53	2.26	-0.07	0.02	-0.01
	60	61	ILE	293	0	0	0	0	0	0	0	0	0	0	0	0	0.69	0.28	-0.75	0.34	-0.07	0.06	0.68	0.28	-0.75	0.34	-0.07	0.06	-0.68	0.28	0.74	0.33	0.07	0.06	0	0	0	0	0	0	-0.68	0.28	0.74	0.33	0.07	0.06	0.01	0	-0.01
	61	62	LYS	294	0	0	0	0	0	0	0	0	0	0	0	0	5.93	1.69	-0.14	0.05	5.79	1.65	5.93	1.69	-0.14	0.05	5.79	1.65	-5.85	1.67	0.14	0.05	-5.72	1.63	0	0	0	0	0	0	-5.85	1.67	0.14	0.05	-5.72	1.63	0.08	0.02	0
	62	63	HIS	295	0	0	0	0	0	0	0	0	0	0	0	0	0.13	0.04	-0.34	0.16	-0.21	0.17	0.13	0.04	-0.34	0.16	-0.21	0.17	-0.12	0.04	0.33	0.15	0.21	0.17	0	0	0	0	0	0	-0.12	0.04	0.33	0.15	0.21	0.17	0	0	0
	63	64	PRO	296	0	0	0	0	0	0	0	0	0	0	0	0	1.11	0.28	-1.15	0.31	-0.04	0.04	1.11	0.28	-1.15	0.31	-0.04	0.04	-1.1	0.28	1.14	0.3	0.04	0.03	0	0	0	0	0	0	-1.1	0.28	1.14	0.3	0.04	0.03	0.01	0	-0.01
	64	65	ASN	297	0	0	0	0	0	0	0	0	0	0	0	0	0.03	0.05	-0.03	0.04	0.01	0.03	0.03	0.05	-0.03	0.04	0.01	0.03	-0.03	0.05	0.03	0.04	-0.01	0.03	0	0	0	0	0	0	-0.03	0.05	0.03	0.04	-0.01	0.03	0	0	0
	65	66	LEU	298	0	0	0	0	0	0	0	0	0	0	0	0	0.54	0.2	-0.36	0.07	0.18	0.15	0.54	0.2	-0.36	0.07	0.18	0.15	-0.53	0.2	0.35	0.07	-0.18	0.15	0	0	0	0	0	0	-0.53	0.2	0.35	0.07	-0.18	0.15	0.01	0	0
	66	67	VAL	299	0	0	0	0	0	0	0	0	0	0	0	0	0.76	0.28	-0.93	0.42	-0.17	0.15	0.76	0.28	-0.93	0.42	-0.17	0.15	-0.75	0.27	0.92	0.42	0.17	0.15	0	0	0	0	0	0	-0.75	0.27	0.92	0.42	0.17	0.15	0.01	0	-0.01
	67	68	GLN	300	0	0	0	0	0	0	0	0	0	0	0	0	0.27	0.11	-0.23	0.08	0.04	0.06	0.27	0.1	-0.23	0.08	0.04	0.06	-0.26	0.1	0.22	0.08	-0.04	0.06	0	0	0	0	0	0	-0.26	0.1	0.22	0.08	-0.04	0.06	0	0	0
	68	69	LEU	301	0	0	0	0	0	0	0	0	0	0	0	0	0.54	0.19	-0.4	0.11	0.14	0.1	0.54	0.19	-0.4	0.11	0.14	0.1	-0.53	0.19	0.39	0.11	-0.14	0.1	0	0	0	0	0	0	-0.53	0.19	0.39	0.11	-0.14	0.1	0.01	0	0
	69	70	LEU	302	0	0	0	0	0	0	0	0	0	0	0	0	0.44	0.13	-0.35	0.08	0.09	0.06	0.44	0.13	-0.35	0.08	0.09	0.06	-0.44	0.12	0.35	0.08	-0.09	0.06	0	0	0	0	0	0	-0.44	0.12	0.35	0.08	-0.09	0.06	0.01	0	0
	70	71	GLY	303	0	0	0	0	0	0	0	0	0	0	0	0	0	0	-0.09	0.07	-0.09	0.07	0	0	-0.09	0.07	-0.09	0.07	0	0	0.09	0.07	0.09	0.07	0	0	0	0	0	0	0	0	0.09	0.07	0.09	0.07	0	0	0
	71	72	VAL	304	0	0	0	0	0	0	0	0	0	0	0	0	0.74	0.25	-0.58	0.16	0.16	0.09	0.74	0.25	-0.58	0.16	0.16	0.09	-0.73	0.24	0.57	0.16	-0.16	0.09	0	0	0	0	0	0	-0.73	0.24	0.57	0.16	-0.16	0.09	0.01	0	-0.01
	72	73	CYS	305	0	0	0	0	0	0	0	0	0	0	0	0	-0.1	0.05	-0.01	0.04	-0.11	0.08	-0.1	0.05	-0.01	0.04	-0.11	0.08	0.1	0.05	0.01	0.04	0.11	0.08	0	0	0	0	0	0	0.1	0.05	0.01	0.04	0.11	0.08	0	0	0
	73	74	THR	306	0	0	0	0	0	0	0	0	0	0	0	0	0.44	0.17	-0.42	0.15	0.02	0.09	0.44	0.17	-0.42	0.15	0.02	0.09	-0.43	0.17	0.42	0.15	-0.02	0.09	0	0	0	0	0	0	-0.43	0.17	0.42	0.15	-0.02	0.09	0.01	0	0
	74	75	ARG	307	0	0	0	0	0	0	0	0	0	0	0	0	5.35	1.31	-0.19	0.07	5.16	1.26	5.35	1.31	-0.19	0.07	5.16	1.26	-5.28	1.3	0.19	0.07	-5.1	1.24	0	0	0	0	0	0	-5.28	1.3	0.19	0.07	-5.1	1.24	0.07	0.02	0
	75	76	GLU	308	0	0	0	0	0	0	0	0	0	0	0	0	-4.59	1.13	-0.77	0.23	-5.35	1.36	-4.59	1.13	-0.77	0.23	-5.35	1.36	4.53	1.12	0.76	0.23	5.29	1.34	0	0	0	0	0	0	4.53	1.12	0.76	0.23	5.29	1.34	-0.06	0.01	-0.01
	76	77	PRO	309	0	0	0	0	0	0	0	0	0	0	0	0	1.29	0.38	-1.1	0.29	0.19	0.1	1.29	0.38	-1.1	0.29	0.19	0.1	-1.27	0.38	1.09	0.28	-0.18	0.1	0	0	0	0	0	0	-1.27	0.38	1.09	0.28	-0.18	0.1	0.02	0	-0.01
	77	78	PRO	310	0	0	0	0	0	0	0	0	0	0	0	0	1.31	0.37	-1.14	0.28	0.17	0.09	1.31	0.37	-1.14	0.28	0.17	0.09	-1.29	0.36	1.13	0.28	-0.17	0.09	0	0	0	0	0	0	-1.29	0.36	1.13	0.28	-0.17	0.09	0.02	0	-0.01
	78	79	PHE	311	0	0	0	0	0	0	0	0	0	0	0	0	0.15	0.06	-0.2	0.09	-0.05	0.06	0.15	0.06	-0.2	0.09	-0.06	0.06	-0.15	0.05	0.2	0.09	0.06	0.06	0	0	0	0	0	0	-0.15	0.05	0.2	0.09	0.06	0.06	0	0	0
	79	80	TYR	312	0	0	0	0	0	0	0	0	0	0	0	0	0.14	0.04	-0.17	0.08	-0.03	0.07	0.14	0.04	-0.17	0.08	-0.03	0.07	-0.14	0.04	0.17	0.08	0.03	0.07	0	0	0	0	0	0	-0.14	0.04	0.17	0.08	0.03	0.07	0	0	0
	80	81	ILE	313	0	0	0	0	0	0	0	0	0	0	0	0	0.73	0.28	-0.7	0.25	0.02	0.05	0.73	0.28	-0.7	0.25	0.02	0.05	-0.72	0.27	0.69	0.24	-0.02	0.05	0	0	0	0	0	0	-0.72	0.27	0.69	0.24	-0.02	0.05	0.01	0	-0.01
	81	82	ILE	314	0	0	0	0	0	0	0	0	0	0	0	0	0.56	0.17	-0.66	0.24	-0.1	0.08	0.56	0.17	-0.66	0.24	-0.1	0.08	-0.55	0.16	0.65	0.24	0.1	0.08	0	0	0	0	0	0	-0.55	0.16	0.65	0.24	0.1	0.08	0.01	0	-0.01
	82	83	ILE	315	0	0	0	0	0	0	0	0	0	0	0	0	0.63	0.22	-0.52	0.14	0.11	0.09	0.63	0.22	-0.52	0.14	0.11	0.09	-0.62	0.22	0.51	0.14	-0.11	0.09	0	0	0	0	0	0	-0.62	0.22	0.51	0.14	-0.11	0.09	0.01	0	-0.01
	83	84	GLU	316	0	0	0	0	0	0	0	0	0	0	0	0	-5.28	1.49	-0.88	0.32	-6.16	1.8	-5.28	1.49	-0.88	0.32	-6.16	1.8	5.21	1.47	0.87	0.31	6.09	1.78	0	0	0	0	0	0	5.21	1.47	0.87	0.31	6.09	1.78	-0.07	0.02	-0.01
	84	85	PHE	317	0	0	0	0	0	0	0	0	0	0	0	0	0.1	0.02	-0.08	0.04	0.02	0.04	0.1	0.02	-0.08	0.04	0.02	0.04	-0.1	0.02	0.08	0.04	-0.02	0.04	0	0	0	0	0	0	-0.1	0.02	0.08	0.04	-0.02	0.04	0	0	0
	85	86	MET	318	0	0	0	0	0	0	0	0	0	0	0	0	0.31	0.1	-0.32	0.1	-0.01	0.06	0.31	0.1	-0.32	0.1	-0.01	0.06	-0.31	0.1	0.32	0.1	0.01	0.06	0	0	0	0	0	0	-0.31	0.1	0.32	0.1	0.01	0.06	0	0	0
	86	87	THR	319	0	0	0	0	0	0	0	0	0	0	0	0	0.22	0.04	-0.26	0.05	-0.03	0.05	0.22	0.04	-0.26	0.05	-0.03	0.05	-0.22	0.04	0.25	0.05	0.03	0.05	0	0	0	0	0	0	-0.22	0.04	0.25	0.05	0.03	0.05	0	0	0
	87	88	TYR	320	0	0	0	0	0	0	0	0	0	0	0	0	0.14	0.03	-0.13	0.02	0.01	0.03	0.14	0.03	-0.13	0.02	0.01	0.03	-0.14	0.03	0.12	0.02	-0.01	0.02	0	0	0	0	0	0	-0.14	0.03	0.12	0.02	-0.01	0.02	0	0	0
	88	89	GLY	321	0	0	0	0	0	0	0	0	0	0	0	0	0	0	0.03	0.05	0.03	0.05	0	0	0.03	0.05	0.03	0.05	0	0	-0.03	0.05	-0.03	0.05	0	0	0	0	0	0	0	0	-0.03	0.05	-0.03	0.05	0	0	0
	89	90	ASN	322	0	0	0	0	0	0	0	0	0	0	0	0	-0.05	0.07	0.18	0.12	0.13	0.12	-0.05	0.07	0.18	0.12	0.13	0.12	0.05	0.06	-0.18	0.12	-0.13	0.12	0	0	0	0	0	0	0.05	0.06	-0.18	0.12	-0.13	0.12	0	0	0
	90	91	LEU	323	0	0	0	0	0	0	0	0	0	0	0	0	0.45	0.12	-0.31	0.04	0.14	0.11	0.45	0.12	-0.31	0.04	0.14	0.11	-0.45	0.12	0.31	0.04	-0.14	0.11	0	0	0	0	0	0	-0.45	0.12	0.31	0.04	-0.14	0.11	0.01	0	0
	91	92	LEU	324	0	0	0	0	0	0	0	0	0	0	0	0	0.46	0.12	-0.31	0.04	0.15	0.11	0.46	0.12	-0.31	0.04	0.15	0.11	-0.46	0.12	0.31	0.04	-0.15	0.1	0	0	0	0	0	0	-0.46	0.12	0.31	0.04	-0.15	0.1	0.01	0	0
	92	93	ASP	325	0	0	0	0	0	0	0	0	0	0	0	0	-4.95	1.17	-0.69	0.11	-5.63	1.27	-4.95	1.17	-0.69	0.11	-5.63	1.27	4.89	1.16	0.68	0.11	5.56	1.26	0	0	0	0	0	0	4.89	1.16	0.68	0.11	5.56	1.26	-0.06	0.01	-0.01
	93	94	TYR	326	0	0	0	0	0	0	0	0	0	0	0	0	0.16	0.04	-0.05	0.05	0.11	0.07	0.16	0.04	-0.05	0.05	0.11	0.07	-0.16	0.04	0.05	0.05	-0.11	0.07	0	0	0	0	0	0	-0.16	0.04	0.05	0.05	-0.11	0.07	0	0	0
	94	95	LEU	327	0	0	0	0	0	0	0	0	0	0	0	0	0.4	0.08	-0.29	0.05	0.11	0.08	0.4	0.08	-0.29	0.05	0.11	0.08	-0.39	0.08	0.28	0.05	-0.11	0.08	0	0	0	0	0	0	-0.39	0.08	0.28	0.05	-0.11	0.08	0.01	0	0
	95	96	ARG	328	0	0	0	0	0	0	0	0	0	0	0	0	5.76	1.16	-0.12	0.02	5.65	1.16	5.76	1.16	-0.12	0.02	5.65	1.16	-5.69	1.14	0.12	0.02	-5.58	1.15	0	0	0	0	0	0	-5.69	1.14	0.12	0.02	-5.58	1.15	0.07	0.02	0
	96	97	GLU	329	0	0	0	0	0	0	0	0	0	0	0	0	-4.05	0.61	-0.5	0.07	-4.54	0.68	-4.05	0.61	-0.5	0.07	-4.54	0.68	4	0.6	0.49	0.07	4.49	0.67	0	0	0	0	0	0	4	0.6	0.49	0.07	4.49	0.67	-0.05	0.01	-0.01
	97	98	CYS	330	0	0	0	0	0	0	0	0	0	0	0	0	-0.09	0.03	0.1	0.05	0	0.03	-0.09	0.03	0.1	0.05	0	0.03	0.09	0.03	-0.09	0.05	0	0.03	0	0	0	0	0	0	0.09	0.03	-0.09	0.05	0	0.03	0	0	0
	98	99	ASN	331	0	0	0	0	0	0	0	0	0	0	0	0	-0.02	0.03	0	0.03	-0.02	0.03	-0.02	0.03	0	0.03	-0.02	0.03	0.02	0.03	0	0.03	0.02	0.03	0	0	0	0	0	0	0.02	0.03	0	0.03	0.02	0.03	0	0	0
	99	100	ARG	332	0	0	0	0	0	0	0	0	0	0	0	0	4.53	0.61	-0.15	0.05	4.38	0.58	4.53	0.61	-0.15	0.05	4.38	0.58	-4.47	0.6	0.15	0.05	-4.32	0.57	0	0	0	0	0	0	-4.47	0.6	0.15	0.05	-4.32	0.57	0.06	0.01	0
	100	101	GLN	333	0	0	0	0	0	0	0	0	0	0	0	0	0.11	0.05	-0.11	0.07	0	0.07	0.11	0.05	-0.11	0.07	0	0.07	-0.11	0.05	0.11	0.07	0	0.07	0	0	0	0	0	0	-0.11	0.05	0.11	0.07	0	0.07	0	0	0
	101	102	GLU	334	0	0	0	0	0	0	0	0	0	0	0	0	-3.55	0.74	-0.48	0.16	-4.03	0.9	-3.55	0.74	-0.48	0.16	-4.03	0.9	3.51	0.74	0.47	0.15	3.98	0.88	0	0	0	0	0	0	3.51	0.74	0.47	0.15	3.98	0.88	-0.04	0.01	-0.01
	102	103	VAL	335	0	0	0	0	0	0	0	0	0	0	0	0	0.46	0.09	-0.42	0.08	0.04	0.03	0.46	0.09	-0.42	0.08	0.04	0.03	-0.46	0.09	0.41	0.08	-0.04	0.03	0	0	0	0	0	0	-0.46	0.09	0.41	0.08	-0.04	0.03	0.01	0	-0.01
	103	104	ASN	336	0	0	0	0	0	0	0	0	0	0	0	0	-0.05	0.07	-0.03	0.04	-0.07	0.09	-0.05	0.07	-0.03	0.04	-0.07	0.09	0.05	0.07	0.03	0.04	0.07	0.09	0	0	0	0	0	0	0.05	0.07	0.03	0.04	0.07	0.09	0	0	0
	104	105	ALA	337	0	0	0	0	0	0	0	0	0	0	0	0	-0.01	0	-0.05	0.05	-0.06	0.05	-0.01	0	-0.05	0.05	-0.06	0.05	0.01	0	0.05	0.05	0.06	0.04	0	0	0	0	0	0	0.01	0	0.05	0.05	0.06	0.04	0	0	0
	105	106	VAL	338	0	0	0	0	0	0	0	0	0	0	0	0	0.46	0.12	-0.5	0.11	-0.05	0.05	0.46	0.12	-0.5	0.11	-0.05	0.05	-0.45	0.12	0.5	0.11	0.04	0.05	0	0	0	0	0	0	-0.45	0.12	0.5	0.11	0.04	0.05	0.01	0	-0.01
	106	107	VAL	339	0	0	0	0	0	0	0	0	0	0	0	0	0.48	0.11	-0.54	0.12	-0.06	0.04	0.48	0.11	-0.54	0.12	-0.06	0.04	-0.48	0.1	0.53	0.12	0.06	0.04	0	0	0	0	0	0	-0.48	0.1	0.53	0.12	0.06	0.04	0.01	0	-0.01
	107	108	LEU	340	0	0	0	0	0	0	0	0	0	0	0	0	0.35	0.06	-0.43	0.11	-0.08	0.06	0.35	0.06	-0.43	0.11	-0.08	0.06	-0.35	0.06	0.43	0.11	0.08	0.06	0	0	0	0	0	0	-0.35	0.06	0.43	0.11	0.08	0.06	0	0	-0.01
	108	109	LEU	341	0	0	0	0	0	0	0	0	0	0	0	0	0.34	0.07	-0.42	0.1	-0.08	0.08	0.34	0.07	-0.42	0.1	-0.08	0.08	-0.34	0.07	0.41	0.1	0.07	0.08	0	0	0	0	0	0	-0.34	0.07	0.41	0.1	0.07	0.08	0	0	-0.01
	109	110	TYR	342	0	0	0	0	0	0	0	0	0	0	0	0	0.13	0.03	-0.19	0.07	-0.06	0.07	0.13	0.03	-0.19	0.07	-0.07	0.07	-0.13	0.03	0.19	0.07	0.06	0.07	0	0	0	0	0	0	-0.13	0.03	0.19	0.07	0.06	0.07	0	0	0
	110	111	MET	343	0	0	0	0	0	0	0	0	0	0	0	0	0.24	0.06	-0.34	0.12	-0.1	0.09	0.24	0.06	-0.34	0.12	-0.1	0.09	-0.24	0.06	0.34	0.11	0.1	0.09	0	0	0	0	0	0	-0.24	0.06	0.34	0.11	0.1	0.09	0	0	0
	111	112	ALA	344	0	0	0	0	0	0	0	0	0	0	0	0	-0.01	0.01	-0.07	0.08	-0.09	0.08	-0.01	0.01	-0.07	0.08	-0.09	0.08	0.01	0.01	0.07	0.08	0.09	0.08	0	0	0	0	0	0	0.01	0.01	0.07	0.08	0.09	0.08	0	0	0
	112	113	THR	345	0	0	0	0	0	0	0	0	0	0	0	0	0.3	0.07	-0.34	0.12	-0.03	0.06	0.3	0.07	-0.34	0.12	-0.03	0.06	-0.3	0.07	0.33	0.11	0.03	0.06	0	0	0	0	0	0	-0.3	0.07	0.33	0.11	0.03	0.06	0	0	0
	113	114	GLN	346	0	0	0	0	0	0	0	0	0	0	0	0	0.14	0.05	-0.24	0.1	-0.1	0.11	0.14	0.05	-0.24	0.1	-0.1	0.11	-0.14	0.05	0.24	0.1	0.1	0.11	0	0	0	0	0	0	-0.14	0.05	0.24	0.1	0.1	0.11	0	0	0
	114	115	ILE	347	0	0	0	0	0	0	0	0	0	0	0	0	0.54	0.16	-0.63	0.23	-0.09	0.08	0.54	0.16	-0.63	0.23	-0.09	0.08	-0.54	0.15	0.62	0.23	0.09	0.08	0	0	0	0	0	0	-0.54	0.15	0.62	0.23	0.09	0.08	0.01	0	-0.01
	115	116	SER	348	0	0	0	0	0	0	0	0	0	0	0	0	0.36	0.11	-0.39	0.15	-0.04	0.05	0.36	0.11	-0.39	0.15	-0.04	0.05	-0.35	0.11	0.39	0.15	0.04	0.05	0	0	0	0	0	0	-0.35	0.11	0.39	0.15	0.04	0.05	0	0	0
	116	117	SER	349	0	0	0	0	0	0	0	0	0	0	0	0	0.25	0.06	-0.34	0.11	-0.09	0.1	0.25	0.06	-0.34	0.11	-0.09	0.1	-0.25	0.06	0.34	0.11	0.09	0.1	0	0	0	0	0	0	-0.25	0.06	0.34	0.11	0.09	0.1	0	0	0
	117	118	ALA	350	0	0	0	0	0	0	0	0	0	0	0	0	0	0	-0.04	0.06	-0.04	0.06	0	0	-0.04	0.06	-0.04	0.06	0	0	0.04	0.06	0.04	0.06	0	0	0	0	0	0	0	0	0.04	0.06	0.04	0.06	0	0	0
	118	119	MET	351	0	0	0	0	0	0	0	0	0	0	0	0	0.27	0.06	-0.41	0.17	-0.13	0.12	0.27	0.06	-0.41	0.17	-0.13	0.12	-0.27	0.06	0.4	0.17	0.13	0.12	0	0	0	0	0	0	-0.27	0.06	0.4	0.17	0.13	0.12	0	0	-0.01
	119	120	GLU	352	0	0	0	0	0	0	0	0	0	0	0	0	-4.69	1.16	-0.76	0.25	-5.45	1.4	-4.69	1.16	-0.76	0.25	-5.46	1.4	4.64	1.14	0.75	0.25	5.39	1.38	0	0	0	0	0	0	4.64	1.14	0.75	0.25	5.39	1.38	-0.06	0.01	-0.01
	120	121	TYR	353	0	0	0	0	0	0	0	0	0	0	0	0	0.24	0.11	-0.17	0.07	0.07	0.07	0.24	0.11	-0.17	0.07	0.07	0.07	-0.24	0.1	0.17	0.07	-0.07	0.06	0	0	0	0	0	0	-0.24	0.1	0.17	0.07	-0.07	0.06	0	0	0
	121	122	LEU	354	0	0	0	0	0	0	0	0	0	0	0	0	0.59	0.24	-0.58	0.23	0.01	0.05	0.58	0.24	-0.58	0.23	0	0.05	-0.58	0.24	0.57	0.23	-0.01	0.05	0	0	0	0	0	0	-0.58	0.24	0.57	0.23	-0.01	0.05	0	0	-0.01
	122	123	GLU	355	0	0	0	0	0	0	0	0	0	0	0	0	-5.18	1.42	-0.82	0.29	-6.01	1.71	-5.18	1.42	-0.82	0.29	-6.01	1.71	5.12	1.41	0.81	0.29	5.93	1.69	0	0	0	0	0	0	5.12	1.41	0.81	0.29	5.93	1.69	-0.06	0.02	-0.01
	123	124	LYS	356	0	0	0	0	0	0	0	0	0	0	0	0	5.48	1.39	-0.1	0.03	5.39	1.4	5.48	1.39	-0.1	0.03	5.39	1.4	-5.41	1.37	0.09	0.03	-5.32	1.38	0	0	0	0	0	0	-5.41	1.37	0.09	0.03	-5.32	1.38	0.07	0.02	0
	124	125	LYS	357	0	0	0	0	0	0	0	0	0	0	0	0	6.66	2.3	-0.26	0.13	6.4	2.18	6.66	2.3	-0.26	0.13	6.4	2.18	-6.57	2.27	0.26	0.13	-6.31	2.15	0	0	0	0	0	0	-6.57	2.27	0.26	0.13	-6.31	2.15	0.09	0.03	0
	125	126	ASN	358	0	0	0	0	0	0	0	0	0	0	0	0	-0.16	0.16	-0.1	0.1	-0.26	0.21	-0.16	0.16	-0.1	0.1	-0.26	0.22	0.16	0.16	0.1	0.1	0.26	0.22	0	0	0	0	0	0	0.16	0.16	0.1	0.1	0.26	0.22	0	0	0
	126	127	PHE	359	0	0	0	0	0	0	-0.02	0.04	0	0	-0.03	0.04	0.23	0.14	0.1	0.17	0.33	0.3	0.2	0.11	0.1	0.16	0.3	0.27	-0.2	0.11	-0.1	0.17	-0.3	0.27	-0.01	0.02	0	0	-0.01	0.02	-0.2	0.12	-0.1	0.17	-0.31	0.27	0	0.03	0
	127	128	ILE	360	0	0	0	0	0	0	-0.05	0.07	-0.02	0.03	-0.07	0.1	0.89	0.43	-1.18	0.78	-0.29	0.4	0.84	0.38	-1.2	0.8	-0.36	0.46	-0.88	0.43	1.19	0.81	0.31	0.42	-0.01	0.03	0	0.01	-0.01	0.03	-0.89	0.44	1.19	0.8	0.3	0.41	-0.05	0.1	-0.01
	128	129	HIS	361	0	0	0	0	0	0	-0.01	0.02	-0.06	0.1	-0.07	0.12	-0.11	0.31	-1.16	1.02	-1.27	1.3	-0.13	0.33	-1.21	1.1	-1.34	1.4	0.14	0.34	1.21	1.1	1.35	1.41	0	0	-0.01	0.02	-0.01	0.02	0.14	0.34	1.2	1.08	1.34	1.4	0.01	0.02	-0.02
	129	130	ARG	362	0	0	0	0	0	0	-0.4	0.58	-0.05	0.08	-0.44	0.64	13.73	7.07	-0.91	0.68	12.81	6.44	13.33	6.66	-0.96	0.75	12.37	5.99	-13.31	6.72	0.94	0.73	-12.37	6.06	-0.09	0.11	0	0	-0.09	0.12	-13.4	6.81	0.94	0.72	-12.46	6.15	-0.07	0.4	-0.02
	130	131	ASP	363	0	0	0	0	0	0	-0.07	0.14	-0.02	0.04	-0.09	0.17	-10.99	6.24	-1.56	0.82	-12.56	7.04	-11.06	6.34	-1.59	0.85	-12.65	7.17	11.01	6.36	1.55	0.82	12.56	7.17	-0.02	0.03	0	0	-0.02	0.03	10.99	6.34	1.55	0.82	12.54	7.14	-0.07	0.05	-0.03
	131	132	LEU	364	0	0	0	0	0	0	0	0	0	0	0	0.01	0.6	0.24	-0.65	0.27	-0.06	0.08	0.6	0.23	-0.66	0.27	-0.06	0.08	-0.59	0.23	0.66	0.28	0.07	0.08	0	0	0	0	0	0	-0.59	0.23	0.66	0.28	0.07	0.08	0.01	0	0
	132	133	ALA	365	0	0	0	0	0	0	0	0	0	0	0	0	0	0.01	-0.12	0.13	-0.13	0.13	0	0.01	-0.13	0.13	-0.13	0.13	0	0.01	0.12	0.13	0.13	0.13	0	0	0	0	0	0	0	0.01	0.12	0.13	0.13	0.13	0	0	0
	133	134	ALA	366	0	0	0	0	0	0	0	0	0	0	0	0	-0.03	0.02	0	0.05	-0.03	0.05	-0.03	0.02	0	0.05	-0.03	0.05	0.03	0.01	0	0.05	0.03	0.05	0	0	0	0	0	0	0.03	0.01	0	0.05	0.03	0.05	0	0	0
	134	135	ARG	367	0	0	0	0	0	0	0	0	0	0	0	0	8.39	2.89	-0.29	0.11	8.1	2.79	8.38	2.89	-0.29	0.12	8.09	2.78	-8.28	2.85	0.29	0.11	-7.99	2.75	0	0	0	0	0	0	-8.28	2.85	0.29	0.11	-7.99	2.75	0.11	0.04	0
	135	136	ASN	368	0	0	0	0	0	0	0	0.01	0	0	-0.01	0.01	0.09	0.16	-0.08	0.1	0.01	0.12	0.09	0.16	-0.08	0.11	0.01	0.12	-0.09	0.16	0.08	0.1	-0.01	0.12	0	0	0	0	0	0	-0.09	0.16	0.08	0.1	-0.01	0.12	0	0.01	0
	136	137	CYS	369	0	0	0	0	0	0	0	0	0	0	0	0	-0.17	0.09	0.13	0.06	-0.04	0.06	-0.17	0.09	0.13	0.06	-0.04	0.06	0.17	0.09	-0.12	0.06	0.04	0.06	0	0	0	0	0	0	0.17	0.09	-0.12	0.06	0.04	0.06	0	0	0
	137	138	LEU	370	0	0	0	0	0	0	0	0	0	0	0	0	0.5	0.16	-0.5	0.16	0	0.03	0.5	0.16	-0.5	0.16	0	0.03	-0.49	0.16	0.49	0.16	0	0.03	0	0	0	0	0	0	-0.49	0.16	0.49	0.16	0	0.03	0.01	0	-0.01
	138	139	VAL	371	0	0	0	0	0	0	0	0	0	0	0	0	0.59	0.14	-0.64	0.18	-0.05	0.06	0.59	0.14	-0.64	0.18	-0.05	0.06	-0.58	0.14	0.63	0.18	0.05	0.06	0	0	0	0	0	0	-0.58	0.14	0.63	0.18	0.05	0.06	0.01	0	-0.01
	139	140	GLY	372	0	0	0	0	0	0	0	0	0	0	0	0	0	0	-0.01	0.02	-0.01	0.02	0	0	-0.01	0.02	-0.01	0.02	0	0	0.01	0.02	0.01	0.02	0	0	0	0	0	0	0	0	0.01	0.02	0.01	0.02	0	0	0
	140	141	GLU	373	0	0	0	0	0	0	0	0	0	0	0	0	-4.1	0.86	-0.64	0.15	-4.74	0.99	-4.1	0.86	-0.64	0.15	-4.74	0.99	4.05	0.85	0.63	0.15	4.68	0.98	0	0	0	0	0	0	4.05	0.85	0.63	0.15	4.68	0.98	-0.05	0.01	-0.01
	141	142	ASN	374	0	0	0	0	0	0	0	0	0	0	0	0	-0.02	0.03	0	0.02	-0.02	0.04	-0.02	0.03	0	0.02	-0.02	0.04	0.02	0.03	0	0.02	0.02	0.03	0	0	0	0	0	0	0.02	0.03	0	0.02	0.02	0.03	0	0	0
	142	143	HIS	375	0	0	0	0	0	0	0	0	0	0	0	0	0.1	0.11	-0.19	0.05	-0.09	0.1	0.1	0.11	-0.19	0.05	-0.09	0.1	-0.1	0.11	0.19	0.05	0.09	0.09	0	0	0	0	0	0	-0.1	0.11	0.19	0.05	0.09	0.09	0	0	0
	143	144	LEU	376	0	0	0	0	0	0	0	0	0	0	0	0	0.39	0.09	-0.4	0.09	-0.02	0.03	0.39	0.09	-0.4	0.09	-0.02	0.03	-0.38	0.09	0.4	0.09	0.02	0.03	0	0	0	0	0	0	-0.38	0.09	0.4	0.09	0.02	0.03	0	0	0
	144	145	VAL	377	0	0	0	0	0	0	0	0	0	0	0	0	0.6	0.15	-0.54	0.12	0.06	0.06	0.6	0.15	-0.54	0.12	0.06	0.06	-0.6	0.15	0.54	0.12	-0.06	0.05	0	0	0	0	0	0	-0.6	0.15	0.54	0.12	-0.06	0.05	0.01	0	-0.01
	145	146	LYS	378	0	0	0	0	0	0	0	0	0	0	0	0	5.97	1.61	-0.15	0.04	5.82	1.58	5.97	1.61	-0.15	0.04	5.82	1.58	-5.89	1.59	0.15	0.04	-5.75	1.56	0	0	0	0	0	0	-5.89	1.59	0.15	0.04	-5.75	1.56	0.08	0.02	0
	146	147	VAL	379	0	0	0	0	0	0	0	0	0	0	0	0	0.78	0.3	-0.67	0.21	0.12	0.11	0.78	0.3	-0.67	0.21	0.12	0.11	-0.77	0.29	0.66	0.2	-0.12	0.11	0	0	0	0	0	0	-0.77	0.29	0.66	0.2	-0.12	0.11	0.01	0	-0.01
	147	148	ALA	380	0	0	0	0	0	0	0	0	0	0	0	0	-0.03	0.02	-0.06	0.11	-0.09	0.13	-0.03	0.02	-0.06	0.12	-0.09	0.13	0.03	0.02	0.06	0.12	0.09	0.13	0	0	0	0	0	0	0.03	0.02	0.06	0.12	0.09	0.13	0	0	0
	148	149	ASP	381	0	0	0	0	0	0	-0.04	0.08	-0.01	0.01	-0.05	0.09	-12.18	7.78	-1.14	0.43	-13.32	8.18	-12.23	7.85	-1.14	0.43	-13.37	8.25	12.26	8.01	1.11	0.41	13.37	8.39	-0.02	0.04	0	0	-0.02	0.04	12.25	7.98	1.11	0.41	13.35	8.36	0.02	0.19	-0.03
	149	150	PHE	382	0	0	0	0	0	0	0	0	-0.01	0.01	-0.01	0.02	0.14	0.05	0.02	0.25	0.16	0.28	0.14	0.05	0.01	0.24	0.15	0.27	-0.14	0.05	-0.01	0.24	-0.15	0.27	0	0	0	0	0	0	-0.14	0.05	-0.01	0.24	-0.15	0.27	0	0	0
	150	151	GLY	383	0	0	0	0	0	0	0	0	-0.06	0.15	-0.06	0.15	0	0	0.27	0.5	0.27	0.5	0	0	0.2	0.49	0.2	0.49	0	0	-0.22	0.49	-0.22	0.49	0	0	-0.02	0.04	-0.02	0.04	0	0	-0.24	0.5	-0.24	0.5	0	0	-0.04
	151	152	LEU	384	0	0	0	0	0	0	0	0.01	-0.01	0.03	-0.02	0.03	0.75	0.34	-0.66	0.24	0.09	0.25	0.74	0.33	-0.68	0.26	0.07	0.23	-0.74	0.34	0.66	0.24	-0.09	0.25	0	0	0	0	0	0	-0.74	0.34	0.66	0.24	-0.09	0.25	0	0.01	-0.02
	152	153	SER	385	0	0	0	0	0	0	-0.06	0.17	-0.03	0.06	-0.09	0.2	0.38	0.59	-0.31	0.44	0.07	0.7	0.32	0.61	-0.34	0.4	-0.02	0.68	-0.22	0.64	0.31	0.43	0.09	0.63	-0.05	0.08	0	0	-0.05	0.08	-0.27	0.61	0.31	0.43	0.04	0.63	0.05	0.21	-0.03
	153	154	ARG	386	0	0	0	0	0	0	-0.04	0.08	-0.02	0.04	-0.06	0.12	12.54	5.7	-0.3	0.24	12.24	5.71	12.5	5.65	-0.32	0.23	12.18	5.63	-12.36	5.6	0.31	0.23	-12.05	5.61	-0.01	0.03	0	0	-0.01	0.03	-12.37	5.62	0.31	0.23	-12.06	5.63	0.13	0.07	-0.01
	154	155	LEU	387	0	0	0	0	0	0	0	0	0	0	-0.01	0.01	0.72	0.3	-0.56	0.22	0.16	0.31	0.72	0.29	-0.56	0.22	0.15	0.31	-0.71	0.29	0.56	0.21	-0.15	0.31	0	0	0	0	0	0	-0.71	0.29	0.56	0.21	-0.15	0.31	0.01	0	0
	155	156	MET	388	0	0	0	0	0	0	0	0	0	0	0	0	0.41	0.17	-0.33	0.1	0.08	0.16	0.41	0.17	-0.33	0.1	0.07	0.16	-0.4	0.17	0.33	0.1	-0.07	0.16	0	0	0	0	0	0	-0.4	0.17	0.33	0.1	-0.07	0.16	0	0	0
	156	157	THR	389	0	0	0	0	0	0	0	0	0	0	0	0.01	0.65	0.28	-0.42	0.15	0.23	0.24	0.65	0.28	-0.43	0.15	0.22	0.23	-0.64	0.27	0.42	0.15	-0.21	0.23	0	0	0	0	0	0	-0.64	0.27	0.42	0.15	-0.21	0.23	0.01	0.01	0
	157	158	GLY	390	0	0	0	0	0	0	0	0	0	0	0	0	0	0	0.09	0.11	0.09	0.11	0	0	0.09	0.11	0.09	0.11	0	0	-0.09	0.11	-0.09	0.11	0	0	0	0	0	0	0	0	-0.09	0.11	-0.09	0.11	0	0	0
	158	159	ASP	391	0	0	0	0	0	0	0	0	0	0	0	0	-6.36	1.81	-0.94	0.26	-7.3	2.01	-6.36	1.81	-0.94	0.26	-7.3	2.01	6.28	1.79	0.93	0.26	7.21	1.99	0	0	0	0	0	0	6.28	1.79	0.93	0.26	7.21	1.99	-0.08	0.02	-0.01
	159	160	THR	392	0	0	0	0	0	0	0	0	0	0	0	0	0.3	0.09	-0.36	0.11	-0.06	0.1	0.3	0.09	-0.36	0.11	-0.06	0.1	-0.29	0.09	0.36	0.11	0.06	0.1	0	0	0	0	0	0	-0.29	0.09	0.36	0.11	0.06	0.1	0	0	0
	160	161	TYR	393	0	0	0	0	0	0	-0.02	0.03	0	0	-0.02	0.03	0.57	0.38	-0.19	0.19	0.38	0.48	0.56	0.36	-0.2	0.19	0.36	0.45	-0.56	0.37	0.2	0.19	-0.37	0.47	0	0	0	0	0	0	-0.56	0.37	0.2	0.19	-0.37	0.47	-0.01	0.02	0
	161	162	THR	394	0	0	0	0	0	0	0	0	0	0	0	0	0.56	0.28	-0.91	0.49	-0.35	0.36	0.56	0.28	-0.92	0.49	-0.35	0.36	-0.55	0.27	0.91	0.49	0.35	0.36	0	0	0	0	0	0	-0.55	0.27	0.91	0.49	0.35	0.36	0.01	0.01	-0.01
	162	163	ALA	395	0	0	0	0	0	0	0	0	0	0.01	0	0.01	-0.03	0.03	0.17	0.26	0.14	0.25	-0.03	0.03	0.17	0.26	0.14	0.25	0.03	0.03	-0.16	0.26	-0.13	0.25	0	0	0	0	0	0	0.03	0.03	-0.16	0.26	-0.13	0.25	0	0	0.01
	163	164	HIS	396	0	0	0	0	0	0	-0.01	0.01	-0.01	0.01	-0.02	0.02	-0.08	0.32	-0.71	0.43	-0.79	0.62	-0.08	0.33	-0.72	0.44	-0.8	0.63	0.09	0.32	0.72	0.44	0.8	0.63	0	0	0	0	0	0	0.09	0.32	0.72	0.44	0.8	0.63	0	0.01	0
	164	165	ALA	397	0	0	0	0	0	0	0	0.01	-0.02	0.03	-0.02	0.03	-0.04	0.03	-0.35	0.49	-0.4	0.51	-0.05	0.03	-0.37	0.51	-0.42	0.53	0.04	0.03	0.38	0.52	0.42	0.54	0	0	0	0.02	-0.01	0.02	0.04	0.03	0.37	0.51	0.42	0.52	0	0.01	0
	165	166	GLY	398	0	0	0	0	0	0	0	0	-0.06	0.11	-0.06	0.11	0	0	-0.28	0.66	-0.28	0.66	0	0	-0.35	0.69	-0.35	0.69	0	0	0.36	0.71	0.36	0.71	0	0	-0.02	0.04	-0.02	0.04	0	0	0.35	0.69	0.35	0.69	0	0	0
	166	167	ALA	399	0	0	0	0	0	0	-0.16	0.24	-0.11	0.14	-0.27	0.37	0.03	0.09	0.66	0.7	0.69	0.75	-0.13	0.19	0.55	0.61	0.42	0.55	-0.03	0.08	-0.61	0.65	-0.64	0.7	-0.09	0.11	-0.01	0.02	-0.1	0.12	-0.12	0.19	-0.62	0.66	-0.74	0.81	-0.25	0.34	-0.07
	167	168	LYS	400	0	0	0	0	0	0	-0.03	0.03	-0.04	0.06	-0.07	0.08	13.42	5.37	-0.8	0.72	12.62	4.97	13.39	5.35	-0.84	0.77	12.55	4.92	-13.18	5.25	0.84	0.76	-12.34	4.82	0	0.02	-0.01	0.02	-0.01	0.02	-13.18	5.26	0.83	0.76	-12.35	4.83	0.21	0.1	-0.01
	168	169	PHE	401	0	0	0	0	0	0	-0.01	0.01	-0.01	0.01	-0.02	0.02	0.19	0.07	-0.15	0.17	0.03	0.2	0.18	0.06	-0.16	0.16	0.02	0.18	-0.18	0.07	0.15	0.16	-0.03	0.19	0	0	0	0	0	0	-0.18	0.07	0.15	0.16	-0.03	0.19	0	0	-0.01
	169	170	PRO	402	0	0	0	0	0	0	-0.01	0.01	0	0	-0.01	0.01	2.07	0.9	-1.97	0.83	0.09	0.09	2.06	0.89	-1.98	0.84	0.08	0.08	-2.04	0.88	1.95	0.83	-0.09	0.09	0	0	0	0	0	0	-2.04	0.88	1.95	0.83	-0.09	0.09	0.02	0.01	-0.03
	170	171	ILE	403	0	0	0	0	0	0	0	0	0	0	0	0	0.69	0.19	-0.62	0.19	0.07	0.08	0.69	0.19	-0.62	0.19	0.07	0.08	-0.68	0.19	0.61	0.19	-0.07	0.08	0	0	0	0	0	0	-0.68	0.19	0.61	0.19	-0.07	0.08	0.01	0	-0.01
	171	172	LYS	404	0	0	0	0	0	0	0	0	0	0	0	0	6.66	1.59	-0.02	0.06	6.64	1.63	6.66	1.59	-0.02	0.06	6.64	1.63	-6.58	1.57	0.02	0.06	-6.55	1.61	0	0	0	0	0	0	-6.58	1.57	0.02	0.06	-6.55	1.61	0.09	0.02	0
	172	173	TRP	405	0	0	0	0	0	0	0	0	0	0	0	0	0.14	0.04	-0.2	0.14	-0.05	0.11	0.14	0.04	-0.2	0.14	-0.05	0.11	-0.14	0.04	0.2	0.14	0.05	0.11	0	0	0	0	0	0	-0.14	0.04	0.2	0.14	0.05	0.11	0	0	0
	173	174	THR	406	0	0	0	0	0	0	0	0	0	0	0	0	0.27	0.09	-0.23	0.08	0.05	0.12	0.27	0.09	-0.23	0.08	0.04	0.12	-0.27	0.09	0.23	0.07	-0.04	0.11	0	0	0	0	0	0	-0.27	0.09	0.23	0.07	-0.04	0.11	0	0	0
	174	175	ALA	407	0	0	0	0	0	0	0	0	0	0	0	0	-0.01	0.01	-0.14	0.08	-0.16	0.08	-0.01	0.01	-0.15	0.08	-0.16	0.08	0.01	0.01	0.14	0.08	0.15	0.08	0	0	0	0	0	0	0.01	0.01	0.14	0.08	0.15	0.08	0	0	0
	175	176	PRO	408	0	0	0	0	0	0	0	0	0	0	0	0	1.3	0.32	-1.44	0.38	-0.15	0.08	1.3	0.32	-1.44	0.38	-0.15	0.08	-1.28	0.32	1.43	0.38	0.15	0.08	0	0	0	0	0	0	-1.28	0.32	1.43	0.38	0.15	0.08	0.02	0	-0.02
	176	177	GLU	409	0	0	0	0	0	0	0	0	0	0	0	0	-6.03	1.7	-0.94	0.27	-6.98	1.95	-6.03	1.7	-0.94	0.27	-6.98	1.95	5.96	1.68	0.93	0.26	6.89	1.92	0	0	0	0	0	0	5.96	1.68	0.93	0.26	6.89	1.92	-0.07	0.02	-0.01
	177	178	SER	410	0	0	0	0	0	0	0	0	0	0	0	0	0.53	0.19	-0.6	0.22	-0.08	0.09	0.53	0.19	-0.6	0.22	-0.08	0.09	-0.52	0.18	0.6	0.22	0.08	0.09	0	0	0	0	0	0	-0.52	0.18	0.6	0.22	0.08	0.09	0.01	0	-0.01
	178	179	LEU	411	0	0	0	0	0	0	0	0	0	0	0	0	0.55	0.15	-0.73	0.22	-0.18	0.1	0.55	0.15	-0.73	0.22	-0.18	0.1	-0.54	0.15	0.72	0.22	0.18	0.1	0	0	0	0	0	0	-0.54	0.15	0.72	0.22	0.18	0.1	0.01	0	-0.01
	179	180	ALA	412	0	0	0	0	0	0	0	0	0	0	0	0	-0.03	0.01	-0.03	0.1	-0.06	0.09	-0.03	0.01	-0.03	0.1	-0.06	0.09	0.03	0.01	0.03	0.09	0.06	0.09	0	0	0	0	0	0	0.03	0.01	0.03	0.09	0.06	0.09	0	0	0
	180	181	TYR	413	0	0	0	0	0	0	0	0	0	0	0	0	0.2	0.06	-0.2	0.07	0	0.06	0.2	0.06	-0.2	0.07	0	0.06	-0.2	0.06	0.2	0.08	0	0.06	0	0	0	0	0	0	-0.2	0.06	0.2	0.08	0	0.06	0	0	0
	181	182	ASN	414	0	0	0	0	0	0	-0.01	0.01	0	0	-0.01	0.01	-0.24	0.32	-0.09	0.15	-0.33	0.37	-0.24	0.32	-0.09	0.15	-0.34	0.38	0.26	0.32	0.09	0.15	0.35	0.39	0	0	0	0	0	0	0.26	0.32	0.09	0.15	0.35	0.39	0.01	0.01	0
	182	183	LYS	415	0	0	0	0	0	0	0	0	0	0	0	0	6.96	1.83	-0.17	0.09	6.78	1.79	6.95	1.83	-0.17	0.09	6.78	1.79	-6.87	1.8	0.17	0.09	-6.69	1.76	0	0	0	0	0	0	-6.87	1.8	0.17	0.09	-6.69	1.76	0.09	0.02	0
	183	184	PHE	416	0	0	0	0	0	0	-0.03	0.03	0	0	-0.03	0.04	0.13	0.05	-0.19	0.13	-0.06	0.12	0.1	0.06	-0.19	0.13	-0.09	0.13	-0.13	0.05	0.2	0.13	0.07	0.12	0	0	0	0	0	0	-0.13	0.05	0.2	0.13	0.07	0.12	-0.02	0.03	0
	184	185	SER	417	0	0	0	0	0	0	0	0	0	0	0	0	0.44	0.16	-0.55	0.23	-0.11	0.12	0.44	0.16	-0.55	0.23	-0.11	0.13	-0.43	0.16	0.54	0.23	0.11	0.12	0	0	0	0	0	0	-0.43	0.16	0.54	0.23	0.11	0.12	0.01	0	-0.01
	185	186	ILE	418	0	0	0	0	0	0	0	0	0	0	0	0	0.62	0.21	-0.63	0.22	0	0.05	0.62	0.21	-0.63	0.22	-0.01	0.06	-0.61	0.21	0.62	0.22	0.01	0.05	0	0	0	0	0	0	-0.61	0.21	0.62	0.22	0.01	0.05	0.01	0	-0.01
	186	187	LYS	419	0	0	0	0	0	0	0	0	0	0	0	0	5.98	1.5	-0.05	0.05	5.93	1.54	5.98	1.5	-0.05	0.05	5.93	1.54	-5.9	1.48	0.05	0.05	-5.86	1.52	0	0	0	0	0	0	-5.9	1.48	0.05	0.05	-5.86	1.52	0.08	0.02	0
	187	188	SER	420	0	0	0	0	0	0	0	0	0	0	0	0	0.39	0.12	-0.3	0.08	0.09	0.09	0.39	0.12	-0.3	0.08	0.09	0.09	-0.38	0.12	0.3	0.08	-0.09	0.09	0	0	0	0	0	0	-0.38	0.12	0.3	0.08	-0.09	0.09	0.01	0	0
	188	189	ASP	421	0	0	0	0	0	0	0	0	0	0	0	0.01	-7.88	3.49	-1.02	0.34	-8.9	3.82	-7.88	3.49	-1.02	0.34	-8.9	3.82	7.8	3.46	1.01	0.33	8.81	3.79	0	0	0	0	0	0	7.8	3.46	1.01	0.33	8.81	3.79	-0.08	0.03	-0.01
	189	190	VAL	422	0	0	0	0	0	0	0	0	0	0	0	0	0.67	0.19	-0.65	0.18	0.02	0.03	0.67	0.19	-0.65	0.18	0.02	0.03	-0.66	0.19	0.64	0.18	-0.02	0.03	0	0	0	0	0	0	-0.66	0.19	0.64	0.18	-0.02	0.03	0.01	0	-0.01
	190	191	TRP	423	0	0	0	0	0	0	0	0	0	0	0	0	0.26	0.09	-0.07	0.04	0.18	0.12	0.26	0.09	-0.07	0.04	0.18	0.12	-0.25	0.09	0.07	0.04	-0.18	0.12	0	0	0	0	0	0	-0.25	0.09	0.07	0.04	-0.18	0.12	0	0	0
	191	192	ALA	424	0	0	0	0	0	0	0	0	0	0	0	0	0.01	0.01	0.13	0.1	0.14	0.12	0.01	0.01	0.13	0.1	0.14	0.11	-0.01	0.01	-0.12	0.1	-0.13	0.11	0	0	0	0	0	0	-0.01	0.01	-0.12	0.1	-0.13	0.11	0	0	0
	192	193	PHE	425	0	0	0	0	0	0	0	0	0	0	0	0	0.12	0.03	-0.07	0.03	0.05	0.05	0.12	0.03	-0.07	0.03	0.05	0.05	-0.12	0.03	0.07	0.03	-0.05	0.05	0	0	0	0	0	0	-0.12	0.03	0.07	0.03	-0.05	0.05	0	0	0
	193	194	GLY	426	0	0	0	0	0	0	0	0	0	0	0	0	0	0	0.09	0.07	0.09	0.07	0	0	0.09	0.07	0.09	0.07	0	0	-0.09	0.07	-0.09	0.07	0	0	0	0	0	0	0	0	-0.09	0.07	-0.09	0.07	0	0	0
	194	195	VAL	427	0	0	0	0	0	0	0	0	0	0	0	0	0.68	0.18	-0.53	0.09	0.15	0.11	0.68	0.18	-0.53	0.09	0.15	0.11	-0.67	0.18	0.52	0.09	-0.15	0.1	0	0	0	0	0	0	-0.67	0.18	0.52	0.09	-0.15	0.1	0.01	0	-0.01
	195	196	LEU	428	0	0	0	0	0	0	0	0	0	0	0	0	0.49	0.15	-0.38	0.06	0.11	0.09	0.49	0.15	-0.38	0.06	0.11	0.09	-0.48	0.15	0.37	0.06	-0.11	0.09	0	0	0	0	0	0	-0.48	0.15	0.37	0.06	-0.11	0.09	0.01	0	0
	196	197	LEU	429	0	0	0	0	0	0	0	0	0	0	0	0	0.41	0.09	-0.35	0.06	0.06	0.05	0.41	0.09	-0.35	0.06	0.06	0.05	-0.4	0.09	0.35	0.06	-0.06	0.05	0	0	0	0	0	0	-0.4	0.09	0.35	0.06	-0.06	0.05	0.01	0	0
	197	198	TRP	430	0	0	0	0	0	0	0	0	0	0	0	0	0.11	0.01	-0.07	0.04	0.04	0.04	0.11	0.01	-0.07	0.04	0.04	0.04	-0.11	0.01	0.07	0.04	-0.04	0.04	0	0	0	0	0	0	-0.11	0.01	0.07	0.04	-0.04	0.04	0	0	0
	198	199	GLU	431	0	0	0	0	0	0	0	0	0	0	0	0	-5.9	1.7	-0.56	0.08	-6.46	1.77	-5.9	1.7	-0.56	0.08	-6.46	1.77	5.83	1.68	0.55	0.08	6.38	1.75	0	0	0	0	0	0	5.83	1.68	0.55	0.08	6.38	1.75	-0.07	0.02	-0.01
	199	200	ILE	432	0	0	0	0	0	0	0	0	0	0	0	0	0.47	0.1	-0.41	0.06	0.06	0.05	0.47	0.1	-0.41	0.06	0.06	0.05	-0.47	0.1	0.4	0.06	-0.06	0.05	0	0	0	0	0	0	-0.47	0.1	0.4	0.06	-0.06	0.05	0.01	0	-0.01
	200	201	ALA	433	0	0	0	0	0	0	0	0	0	0	0	0	-0.01	0	0.08	0.05	0.07	0.05	-0.01	0	0.08	0.05	0.07	0.05	0.01	0	-0.08	0.05	-0.07	0.05	0	0	0	0	0	0	0.01	0	-0.08	0.05	-0.07	0.05	0	0	0
	201	202	THR	434	0	0	0	0	0	0	0	0	0	0	0	0	0.23	0.04	-0.21	0.02	0.02	0.03	0.23	0.04	-0.21	0.02	0.02	0.03	-0.23	0.04	0.21	0.02	-0.02	0.03	0	0	0	0	0	0	-0.23	0.04	0.21	0.02	-0.02	0.03	0	0	0
	202	203	TYR	435	0	0	0	0	0	0	0	0	0	0	0	0	0.12	0.02	-0.1	0.02	0.03	0.03	0.12	0.02	-0.1	0.02	0.03	0.03	-0.12	0.02	0.09	0.02	-0.02	0.03	0	0	0	0	0	0	-0.12	0.02	0.09	0.02	-0.02	0.03	0	0	0
	203	204	GLY	436	0	0	0	0	0	0	0	0	0	0	0	0	0	0	0.03	0.04	0.03	0.04	0	0	0.03	0.04	0.03	0.04	0	0	-0.03	0.04	-0.03	0.04	0	0	0	0	0	0	0	0	-0.03	0.04	-0.03	0.04	0	0	0
	204	205	MET	437	0	0	0	0	0	0	0	0	0	0	0	0	0.27	0.05	-0.35	0.11	-0.07	0.07	0.27	0.05	-0.35	0.11	-0.07	0.07	-0.27	0.05	0.34	0.11	0.07	0.07	0	0	0	0	0	0	-0.27	0.05	0.34	0.11	0.07	0.07	0	0	0
	205	206	SER	438	0	0	0	0	0	0	0	0	0	0	0	0	0.3	0.08	-0.21	0.03	0.1	0.08	0.3	0.08	-0.21	0.03	0.1	0.08	-0.3	0.08	0.2	0.03	-0.09	0.08	0	0	0	0	0	0	-0.3	0.08	0.2	0.03	-0.09	0.08	0	0	0
	206	207	PRO	439	0	0	0	0	0	0	0	0	0	0	0	0	1.28	0.32	-1.27	0.3	0.01	0.07	1.28	0.32	-1.27	0.3	0.01	0.07	-1.27	0.31	1.26	0.29	-0.01	0.07	0	0	0	0	0	0	-1.27	0.31	1.26	0.29	-0.01	0.07	0.02	0	-0.02
	207	208	TYR	440	0	0	0	0	0	0	0	0	0	0	0	0	0.25	0.08	-0.25	0.09	0	0.05	0.25	0.08	-0.25	0.09	0	0.05	-0.24	0.08	0.24	0.09	0	0.05	0	0	0	0	0	0	-0.24	0.08	0.24	0.09	0	0.05	0	0	0
	208	209	PRO	441	0	0	0	0	0	0	0	0	0	0	0	0	1.07	0.2	-1.08	0.22	-0.01	0.04	1.07	0.2	-1.08	0.22	-0.01	0.04	-1.06	0.2	1.07	0.21	0.01	0.04	0	0	0	0	0	0	-1.06	0.2	1.07	0.21	0.01	0.04	0.01	0	-0.01
	209	210	GLY	442	0	0	0	0	0	0	0	0	0	0	0	0	0	0	0.03	0.05	0.03	0.05	0	0	0.03	0.05	0.03	0.05	0	0	-0.03	0.05	-0.03	0.05	0	0	0	0	0	0	0	0	-0.03	0.05	-0.03	0.05	0	0	0
	210	211	ILE	443	0	0	0	0	0	0	0	0	0	0	0	0	0.48	0.12	-0.52	0.11	-0.04	0.07	0.48	0.11	-0.52	0.11	-0.04	0.07	-0.47	0.11	0.51	0.11	0.04	0.07	0	0	0	0	0	0	-0.47	0.11	0.51	0.11	0.04	0.07	0.01	0	-0.01
	211	212	ASP	444	0	0	0	0	0	0	0	0	0	0	0	0	-5.19	1.85	-0.83	0.25	-6.02	2.08	-5.19	1.85	-0.83	0.25	-6.02	2.09	5.13	1.83	0.82	0.24	5.95	2.07	0	0	0	0	0	0	5.13	1.83	0.82	0.24	5.95	2.07	-0.06	0.02	-0.01
	212	213	LEU	445	0	0	0	0	0	0	0	0	0	0	0	0	0.5	0.13	-0.57	0.17	-0.08	0.06	0.5	0.13	-0.57	0.17	-0.08	0.06	-0.49	0.13	0.57	0.17	0.08	0.06	0	0	0	0	0	0	-0.49	0.13	0.57	0.17	0.08	0.06	0.01	0	-0.01
	213	214	SER	446	0	0	0	0	0	0	0	0.01	0	0.01	0	0.01	0.34	0.12	-0.44	0.28	-0.1	0.31	0.34	0.12	-0.44	0.28	-0.1	0.32	-0.33	0.12	0.44	0.28	0.11	0.32	0	0.01	0	0	0	0.01	-0.33	0.12	0.44	0.28	0.1	0.32	0	0	0
	214	215	GLN	447	0	0	0	0	0	0	0	0.02	0	0	0	0.02	0.23	0.18	-0.14	0.07	0.08	0.18	0.23	0.19	-0.15	0.07	0.08	0.19	-0.22	0.19	0.14	0.07	-0.08	0.19	0	0.01	0	0	0	0.01	-0.22	0.18	0.14	0.07	-0.08	0.18	0	0.01	0
	215	216	VAL	448	0	0	0	0	0	0	0	0	0	0	0	0	0.67	0.18	-0.55	0.13	0.12	0.06	0.67	0.18	-0.55	0.13	0.12	0.06	-0.66	0.18	0.54	0.13	-0.12	0.06	0	0	0	0	0	0	-0.66	0.18	0.54	0.13	-0.12	0.06	0.01	0	-0.01
	216	217	TYR	449	0	0	0	0	0	0	0	0	0	0	0	0	0.15	0.08	-0.08	0.07	0.08	0.14	0.15	0.08	-0.08	0.07	0.08	0.14	-0.15	0.08	0.08	0.07	-0.07	0.14	0	0	0	0	0	0	-0.15	0.08	0.08	0.07	-0.07	0.14	0	0	0
	217	218	GLU	450	0	0	0	0	0	0	0	0.01	0	0	0	0.01	-5.07	2.41	-0.58	0.13	-5.65	2.52	-5.07	2.42	-0.58	0.13	-5.65	2.53	5.01	2.41	0.58	0.13	5.59	2.52	0	0	0	0	0	0	5.01	2.41	0.58	0.13	5.59	2.52	-0.06	0.02	-0.01
	218	219	LEU	451	0	0	0	0	0	0	0	0	0	0	0	0	0.4	0.11	-0.3	0.06	0.1	0.05	0.4	0.11	-0.3	0.06	0.1	0.05	-0.4	0.11	0.3	0.06	-0.1	0.05	0	0	0	0	0	0	-0.4	0.11	0.3	0.06	-0.1	0.05	0	0	0
	219	220	LEU	452	0	0	0	0	0	0	0	0	0	0	0	0	0.44	0.1	-0.32	0.05	0.12	0.06	0.44	0.1	-0.32	0.05	0.12	0.06	-0.43	0.1	0.31	0.05	-0.12	0.06	0	0	0	0	0	0	-0.43	0.1	0.31	0.05	-0.12	0.06	0.01	0	0
	220	221	GLU	453	0	0	0	0	0	0	0	0	0	0	0	0	-4.67	1.31	-0.54	0.09	-5.21	1.39	-4.67	1.31	-0.54	0.09	-5.21	1.39	4.62	1.3	0.53	0.09	5.15	1.38	0	0	0	0	0	0	4.62	1.3	0.53	0.09	5.15	1.38	-0.06	0.01	-0.01
	221	222	LYS	454	0	0	0	0	0	0	0	0	0	0	0	0	4.79	1.15	-0.08	0.03	4.72	1.13	4.79	1.15	-0.08	0.03	4.72	1.13	-4.73	1.14	0.07	0.03	-4.66	1.12	0	0	0	0	0	0	-4.73	1.14	0.07	0.03	-4.66	1.12	0.06	0.02	0
	222	223	ASP	455	0	0	0	0	0	0	0	0	0	0	0	0	-3.91	0.67	-0.62	0.11	-4.53	0.77	-3.91	0.67	-0.62	0.11	-4.53	0.77	3.86	0.66	0.61	0.1	4.47	0.76	0	0	0	0	0	0	3.86	0.66	0.61	0.1	4.47	0.76	-0.05	0.01	-0.01
	223	224	TYR	456	0	0	0	0	0	0	0	0	0	0	0	0	0.1	0.02	-0.2	0.06	-0.1	0.06	0.1	0.02	-0.2	0.06	-0.1	0.06	-0.1	0.02	0.2	0.05	0.1	0.05	0	0	0	0	0	0	-0.1	0.02	0.2	0.05	0.1	0.05	0	0	0
	224	225	ARG	457	0	0	0	0	0	0	0	0	0	0	0	0	5.38	1.03	-0.11	0.04	5.26	1.02	5.38	1.03	-0.11	0.04	5.26	1.02	-5.31	1.02	0.11	0.04	-5.2	1.01	0	0	0	0	0	0	-5.31	1.02	0.11	0.04	-5.2	1.01	0.07	0.01	0
	225	226	MET	458	0	0	0	0	0	0	0	0	0	0	0	0	0.25	0.05	-0.21	0.03	0.04	0.03	0.25	0.05	-0.21	0.03	0.04	0.03	-0.25	0.05	0.21	0.03	-0.04	0.03	0	0	0	0	0	0	-0.25	0.05	0.21	0.03	-0.04	0.03	0	0	0
	226	227	GLU	459	0	0	0	0	0	0	0	0	0	0	0	0	-3.95	0.58	-0.64	0.12	-4.59	0.69	-3.95	0.58	-0.64	0.12	-4.59	0.69	3.9	0.57	0.63	0.12	4.53	0.68	0	0	0	0	0	0	3.9	0.57	0.63	0.12	4.53	0.68	-0.05	0.01	-0.01
	227	228	ARG	460	0	0	0	0	0	0	0	0	0	0	0	0	4.27	0.56	-0.13	0.02	4.14	0.56	4.27	0.56	-0.13	0.02	4.14	0.56	-4.22	0.55	0.12	0.02	-4.09	0.55	0	0	0	0	0	0	-4.22	0.55	0.12	0.02	-4.09	0.55	0.05	0.01	0
	228	229	PRO	461	0	0	0	0	0	0	0	0	0	0	0	0	0.96	0.15	-0.89	0.12	0.06	0.04	0.96	0.15	-0.89	0.12	0.06	0.04	-0.94	0.14	0.88	0.12	-0.06	0.04	0	0	0	0	0	0	-0.94	0.14	0.88	0.12	-0.06	0.04	0.01	0	-0.01
	229	230	GLU	462	0	0	0	0	0	0	0	0	0	0	0	0	-3.49	0.4	-0.56	0.09	-4.06	0.48	-3.49	0.4	-0.56	0.09	-4.06	0.48	3.45	0.39	0.56	0.09	4.01	0.48	0	0	0	0	0	0	3.45	0.39	0.56	0.09	4.01	0.48	-0.04	0.01	-0.01
	230	231	GLY	463	0	0	0	0	0	0	0	0	0	0	0	0	0	0	-0.02	0.03	-0.02	0.03	0	0	-0.02	0.03	-0.02	0.03	0	0	0.02	0.03	0.02	0.03	0	0	0	0	0	0	0	0	0.02	0.03	0.02	0.03	0	0	0
	231	232	CYS	464	0	0	0	0	0	0	0	0	0	0	0	0	-0.11	0.03	0.14	0.04	0.03	0.02	-0.11	0.03	0.14	0.04	0.03	0.02	0.11	0.03	-0.14	0.04	-0.03	0.02	0	0	0	0	0	0	0.11	0.03	-0.14	0.04	-0.03	0.02	0	0	0
	232	233	PRO	465	0	0	0	0	0	0	0	0	0	0	0	0	0.88	0.15	-0.94	0.15	-0.06	0.06	0.88	0.15	-0.94	0.15	-0.06	0.06	-0.87	0.15	0.93	0.15	0.06	0.06	0	0	0	0	0	0	-0.87	0.15	0.93	0.15	0.06	0.06	0.01	0	-0.01
	233	234	GLU	466	0	0	0	0	0	0	0	0	0	0	0	0	-3.52	0.51	-0.55	0.09	-4.07	0.59	-3.52	0.51	-0.55	0.09	-4.07	0.59	3.48	0.5	0.54	0.09	4.02	0.58	0	0	0	0	0	0	3.48	0.5	0.54	0.09	4.02	0.58	-0.04	0.01	-0.01
	234	235	LYS	467	0	0	0	0	0	0	0	0	0	0	0	0	4.12	0.72	-0.14	0.04	3.98	0.71	4.12	0.72	-0.14	0.04	3.98	0.71	-4.07	0.71	0.14	0.04	-3.93	0.7	0	0	0	0	0	0	-4.07	0.71	0.14	0.04	-3.93	0.7	0.05	0.01	0
	235	236	VAL	468	0	0	0	0	0	0	0	0	0	0	0	0	0.49	0.08	-0.55	0.11	-0.06	0.05	0.49	0.08	-0.55	0.11	-0.06	0.05	-0.48	0.08	0.54	0.11	0.06	0.05	0	0	0	0	0	0	-0.48	0.08	0.54	0.11	0.06	0.05	0.01	0	-0.01
	236	237	TYR	469	0	0	0	0	0	0	0	0	0	0	0	0	0.09	0.01	-0.19	0.06	-0.1	0.06	0.09	0.01	-0.19	0.06	-0.1	0.06	-0.09	0.01	0.19	0.06	0.1	0.06	0	0	0	0	0	0	-0.09	0.01	0.19	0.06	0.1	0.06	0	0	0
	237	238	GLU	470	0	0	0	0	0	0	0	0	0	0	0	0	-3.63	0.49	-0.59	0.11	-4.22	0.57	-3.63	0.49	-0.59	0.11	-4.22	0.57	3.59	0.48	0.58	0.1	4.16	0.57	0	0	0	0	0	0	3.59	0.48	0.58	0.1	4.16	0.57	-0.05	0.01	-0.01
	238	239	LEU	471	0	0	0	0	0	0	0	0	0	0	0	0	0.36	0.07	-0.41	0.1	-0.05	0.05	0.36	0.07	-0.41	0.1	-0.05	0.05	-0.36	0.07	0.41	0.1	0.05	0.05	0	0	0	0	0	0	-0.36	0.07	0.41	0.1	0.05	0.05	0	0	-0.01
	239	240	MET	472	0	0	0	0	0	0	0	0	0	0	0	0	0.26	0.05	-0.34	0.1	-0.08	0.07	0.26	0.05	-0.34	0.1	-0.08	0.07	-0.25	0.05	0.33	0.1	0.08	0.07	0	0	0	0	0	0	-0.25	0.05	0.33	0.1	0.08	0.07	0	0	0
	240	241	ARG	473	0	0	0	0	0	0	0	0	0	0	0	0	4.7	0.7	-0.22	0.06	4.48	0.64	4.7	0.7	-0.22	0.06	4.48	0.64	-4.64	0.69	0.22	0.06	-4.43	0.64	0	0	0	0	0	0	-4.64	0.69	0.22	0.06	-4.43	0.64	0.06	0.01	0
	241	242	ALA	474	0	0	0	0	0	0	0	0	0	0	0	0	-0.01	0	-0.03	0.04	-0.04	0.04	-0.01	0	-0.03	0.04	-0.04	0.04	0.01	0	0.03	0.04	0.04	0.04	0	0	0	0	0	0	0.01	0	0.03	0.04	0.04	0.04	0	0	0
	242	243	CYS	475	0	0	0	0	0	0	0	0	0	0	0	0	-0.12	0.05	0.02	0.04	-0.1	0.07	-0.12	0.05	0.02	0.04	-0.1	0.07	0.12	0.05	-0.02	0.04	0.1	0.07	0	0	0	0	0	0	0.12	0.05	-0.02	0.04	0.1	0.07	0	0	0
	243	244	TRP	476	0	0	0	0	0	0	0	0	0	0	0	0	0.25	0.09	-0.15	0.04	0.09	0.08	0.25	0.09	-0.15	0.04	0.09	0.08	-0.24	0.09	0.15	0.04	-0.09	0.08	0	0	0	0	0	0	-0.24	0.09	0.15	0.04	-0.09	0.08	0	0	0
	244	245	GLN	477	0	0	0	0	0	0	0	0	0	0	0	0	0.16	0.05	-0.3	0.1	-0.13	0.07	0.16	0.05	-0.3	0.1	-0.13	0.07	-0.16	0.04	0.29	0.1	0.13	0.07	0	0	0	0	0	0	-0.16	0.04	0.29	0.1	0.13	0.07	0	0	0
	245	246	TRP	478	0	0	0	0	0	0	0	0	0	0	0	0	0.12	0.03	-0.28	0.1	-0.16	0.1	0.12	0.03	-0.28	0.1	-0.16	0.1	-0.12	0.03	0.28	0.1	0.16	0.09	0	0	0	0	0	0	-0.12	0.03	0.28	0.1	0.16	0.09	0	0	0
	246	247	ASN	479	0	0	0	0	0	0	0	0	0	0	0	0	-0.13	0.08	0.05	0.04	-0.07	0.08	-0.13	0.08	0.05	0.04	-0.07	0.08	0.13	0.08	-0.05	0.04	0.07	0.08	0	0	0	0	0	0	0.13	0.08	-0.05	0.04	0.07	0.08	0	0	0
	247	248	PRO	480	0	0	0	0	0	0	0	0	0	0	0	0	1.23	0.3	-1.17	0.27	0.06	0.05	1.23	0.3	-1.17	0.27	0.06	0.05	-1.21	0.3	1.15	0.27	-0.06	0.05	0	0	0	0	0	0	-1.21	0.3	1.15	0.27	-0.06	0.05	0.02	0	-0.01
	248	249	SER	481	0	0	0	0	0	0	0	0	0	0	0	0	0.24	0.05	-0.25	0.06	-0.02	0.05	0.24	0.05	-0.25	0.06	-0.02	0.05	-0.23	0.05	0.25	0.05	0.02	0.05	0	0	0	0	0	0	-0.23	0.05	0.25	0.05	0.02	0.05	0	0	0
	249	250	ASP	482	0	0	0	0	0	0	0	0	0	0	0	0	-4	0.67	-0.66	0.11	-4.66	0.78	-4	0.67	-0.66	0.11	-4.66	0.78	3.95	0.66	0.65	0.11	4.6	0.77	0	0	0	0	0	0	3.95	0.66	0.65	0.11	4.6	0.77	-0.05	0.01	-0.01
	250	251	ARG	483	0	0	0	0	0	0	0	0	0	0	0	0	6.42	1.63	-0.18	0.04	6.24	1.59	6.42	1.63	-0.18	0.04	6.24	1.59	-6.34	1.61	0.17	0.04	-6.16	1.57	0	0	0	0	0	0	-6.34	1.61	0.17	0.04	-6.16	1.57	0.08	0.02	0
	251	252	PRO	484	0	0	0	0	0	0	0	0	0	0	0	0	1.06	0.22	-1.19	0.3	-0.13	0.08	1.06	0.22	-1.19	0.3	-0.13	0.08	-1.04	0.22	1.17	0.29	0.13	0.08	0	0	0	0	0	0	-1.04	0.22	1.17	0.29	0.13	0.08	0.01	0	-0.01
	252	253	SER	485	0	0	0	0	0	0	0	0	0	0	0	0	0.32	0.09	-0.22	0.03	0.1	0.09	0.32	0.09	-0.22	0.03	0.1	0.09	-0.32	0.09	0.22	0.03	-0.09	0.09	0	0	0	0	0	0	-0.32	0.09	0.22	0.03	-0.09	0.09	0	0	0
	253	254	PHE	486	0	0	0	0	0	0	0	0	0	0	0	0	0.14	0.05	-0.04	0.05	0.1	0.08	0.14	0.05	-0.04	0.05	0.1	0.08	-0.13	0.05	0.04	0.05	-0.1	0.08	0	0	0	0	0	0	-0.13	0.05	0.04	0.05	-0.1	0.08	0	0	0
	254	255	ALA	487	0	0	0	0	0	0	0	0	0	0	0	0	-0.01	0	0.06	0.05	0.05	0.05	-0.01	0	0.06	0.05	0.05	0.05	0.01	0	-0.06	0.05	-0.05	0.05	0	0	0	0	0	0	0.01	0	-0.06	0.05	-0.05	0.05	0	0	0
	255	256	GLU	488	0	0	0	0	0	0	0	0	0	0	0	0	-4.23	0.88	-0.53	0.1	-4.76	0.96	-4.23	0.88	-0.53	0.1	-4.76	0.96	4.18	0.87	0.52	0.1	4.7	0.95	0	0	0	0	0	0	4.18	0.87	0.52	0.1	4.7	0.95	-0.05	0.01	-0.01
	256	257	ILE	489	0	0	0	0	0	0	0	0	0	0	0	0	0.47	0.11	-0.37	0.07	0.1	0.08	0.47	0.11	-0.37	0.07	0.1	0.08	-0.47	0.11	0.37	0.07	-0.1	0.08	0	0	0	0	0	0	-0.47	0.11	0.37	0.07	-0.1	0.08	0.01	0	0
	257	258	HIS	490	0	0	0	0	0	0	0	0	0	0	0	0	0.19	0.05	-0.13	0.05	0.06	0.07	0.19	0.05	-0.13	0.05	0.06	0.07	-0.19	0.05	0.13	0.05	-0.06	0.07	0	0	0	0	0	0	-0.19	0.05	0.13	0.05	-0.06	0.07	0	0	0
	258	259	GLN	491	0	0	0	0	0	0	0	0	0	0	0	0	0.22	0.08	-0.1	0.06	0.12	0.1	0.22	0.08	-0.1	0.06	0.12	0.1	-0.22	0.08	0.1	0.05	-0.11	0.1	0	0	0	0	0	0	-0.22	0.08	0.1	0.05	-0.11	0.1	0	0	0
	259	260	ALA	492	0	0	0	0	0	0	0	0	0	0	0	0	0	0	0.07	0.06	0.07	0.06	0	0	0.07	0.06	0.07	0.06	0	0	-0.07	0.06	-0.07	0.06	0	0	0	0	0	0	0	0	-0.07	0.06	-0.07	0.06	0	0	0
	260	261	PHE	493	0	0	0	0	0	0	0	0	0	0	0	0	0.1	0.02	-0.04	0.07	0.06	0.07	0.1	0.02	-0.04	0.07	0.06	0.07	-0.1	0.02	0.04	0.06	-0.06	0.07	0	0	0	0	0	0	-0.1	0.02	0.04	0.06	-0.06	0.07	0	0	0
	261	262	GLU	494	0	0	0	0	0	0	0	0	0	0	0	0	-3.99	0.95	-0.49	0.13	-4.48	1.07	-3.99	0.95	-0.49	0.13	-4.48	1.07	3.94	0.93	0.48	0.13	4.42	1.06	0	0	0	0	0	0	3.94	0.93	0.48	0.13	4.42	1.06	-0.05	0.01	-0.01
	262	263	THR	495	0	0	0	0	0	0	0	0	0	0	0	0	0.22	0.05	-0.18	0.05	0.04	0.04	0.22	0.05	-0.18	0.05	0.04	0.04	-0.22	0.04	0.18	0.05	-0.04	0.04	0	0	0	0	0	0	-0.22	0.04	0.18	0.05	-0.04	0.04	0	0	0
	263	264	MET	496	0	0	0	0	0	0	0	0	0	0	0	0	0.23	0.05	-0.2	0.08	0.03	0.05	0.23	0.05	-0.2	0.08	0.03	0.05	-0.23	0.05	0.2	0.08	-0.03	0.05	0	0	0	0	0	0	-0.23	0.05	0.2	0.08	-0.03	0.05	0	0	0
	264	265	PHE	497	0	0	0	0	0	0	0	0	0	0	0	0	-6.38	1.73	2.34	0.64	-4.04	1.09	-6.38	1.73	2.34	0.64	-4.04	1.09	6.3	1.7	-2.31	0.63	3.99	1.08	0	0	0	0	0	0	6.3	1.7	-2.31	0.63	3.99	1.08	-0.08	0.02	0.03
	265	266	LIG	498	0	0	0	0	0	0	-2.22	1.99	0	0	-2.22	1.99	-52.51	12.88	0	0	-52.51	12.88	-54.73	14.43	0	0	-54.73	14.43	52.22	12.96	0	0	52.22	12.96	-0.62	0.54	0	0	-0.62	0.54	51.6	12.54	0	0	51.6	12.54	-3.13	2.4	0
[truncated: 3 more columns]

## Sheet: T315I_nicergoline
=>>	COMPLEX
	Number	Residue	Residue Name	Residue ID	SINT		BINT		TINT		SVDW		BVDW		TVDW		SELE		BELE		TELE		SGAS		BGAS		TGAS		SGB		BGB		TGB		SGBSUR		BGBSUR		TGBSUR		SGBSOL		BGBSOL		TGBSOL		SGBTOT		BGBTOT
	0	1	ASP	233	5.6	1.59	3.99	0.83	9.58	2.02	-1.14	0.91	-0.33	0.44	-1.47	1.11	-65.73	7.3	-17.05	2.54	-82.78	7.47	-61.27	7.38	-13.39	2.51	-74.66	7.53	-55.74	7.25	-6.42	2.26	-62.16	7.25	0.93	0.06	0.12	0.04	1.05	0.09	-54.81	7.23	-6.3	2.27	-61.11	7.22	-116.09	1.67	-19.69
	1	2	LYS	234	11.18	2.37	10.4	1.37	21.58	2.83	-0.23	0.83	-0.01	0.66	-0.24	1.09	13.9	4.54	-2.67	1.33	11.24	4.78	24.85	5.24	7.72	1.52	32.57	5.49	-40.92	4.48	-6.03	1.29	-46.95	4.61	1.2	0.12	0.24	0.05	1.44	0.12	-39.73	4.48	-5.79	1.27	-45.52	4.6	-14.87	2.63	1.93
	2	3	TRP	235	10.67	2.02	10.35	1.35	21.02	2.46	-5.37	0.83	-0.74	0.95	-6.11	1.34	10.27	1.54	-17.08	1.26	-6.81	1.92	15.57	2.57	-7.47	1.53	8.1	2.92	-5.68	1.29	-1.96	0.81	-7.63	1.46	0.43	0.11	0.01	0.01	0.44	0.11	-5.25	1.3	-1.94	0.81	-7.19	1.46	10.32	2.16	-9.42
	3	4	GLU	236	6.32	1.71	9.97	1.09	16.29	2.03	-1.67	0.91	-0.94	0.76	-2.61	1.32	-15.29	8.94	-4.42	2.58	-19.71	8.54	-10.64	8.53	4.61	2.55	-6.03	8.15	-47.85	8.17	-7.34	2.13	-55.19	7.92	0.27	0.07	0.08	0.04	0.36	0.07	-47.58	8.16	-7.26	2.12	-54.84	7.91	-58.22	1.73	-2.65
	4	5	MET	237	7.59	2.18	9.91	1.21	17.51	2.83	-6.26	0.71	-1.1	0.71	-7.35	1.1	-1.41	0.65	-7.05	1.58	-8.46	1.7	-0.08	2.59	1.76	2.08	1.69	3.84	1.18	0.54	-4.69	1.17	-3.51	1.25	0.04	0.02	0.05	0.03	0.09	0.04	1.22	0.54	-4.64	1.16	-3.42	1.24	1.15	2.4	-2.87
	5	6	GLU	238	6.38	1.66	10.3	1.36	16.68	2.26	-1.12	0.65	-0.47	0.84	-1.58	1.14	5.1	7.59	5.82	2.61	10.92	7.76	10.36	7.83	15.64	2.85	26.01	7.88	-67.61	7.58	-8.46	1.62	-76.08	7.66	0.76	0.11	0.04	0.03	0.81	0.12	-66.85	7.55	-8.42	1.61	-75.27	7.62	-56.48	1.63	7.22
	6	7	ARG	239	14.55	3.01	11.98	1.44	26.53	3.41	-1.49	1.48	0.04	0.71	-1.45	1.9	-201.75	11.53	-4.24	1.69	-206	12.42	-188.7	11.51	7.78	2.33	-180.91	12.49	14.64	10.16	-6.53	1.61	8.1	11.08	0.87	0.14	0.15	0.05	1.02	0.16	15.5	10.07	-6.38	1.6	9.12	10.98	-173.19	3.06	1.4
	7	8	THR	240	6.36	1.44	10.57	1.57	16.92	2.37	0.08	0.62	1.28	0.92	1.36	1.26	-20.87	1.76	-21.76	2.52	-42.63	2.56	-14.43	2.01	-9.92	2.82	-24.35	3.15	-3.59	1.14	-0.21	1.68	-3.8	1.68	0.71	0.05	0.08	0.03	0.79	0.06	-2.88	1.13	-0.13	1.66	-3.02	1.66	-17.31	1.64	-10.05
	8	9	ASP	241	5.1	1.65	10.98	1.38	16.08	2.25	-3.09	0.74	-1.22	0.97	-4.31	1.35	-15.3	8.42	-8.62	1.55	-23.92	9.08	-13.29	8.27	1.14	2.04	-12.15	9.01	-43.82	8.16	-3.01	1.36	-46.83	8.6	0.12	0.06	0.01	0.01	0.13	0.06	-43.71	8.14	-3	1.36	-46.7	8.59	-56.99	1.95	-1.85
	9	10	ILE	242	9.8	1.94	10.33	1.31	20.14	2.4	-3.82	0.93	-0.41	0.7	-4.22	1.27	-4.39	0.48	-5.52	1.18	-9.92	1.11	1.59	2.13	4.4	1.75	6	2.69	2.47	0.43	-5.97	1.1	-3.5	0.93	0.01	0.01	0.1	0.03	0.1	0.04	2.47	0.42	-5.87	1.09	-3.4	0.92	4.07	2.07	-1.47
	10	11	THR	243	6.51	1.47	10.75	1.27	17.26	2.18	-1.13	0.57	-0.46	0.95	-1.59	1.09	-21.96	1.78	-12.39	1.08	-34.35	2.17	-16.58	2.13	-2.1	1.62	-18.68	3.03	-1.76	1.36	-2.56	0.72	-4.32	1.45	0.43	0.07	0.03	0.01	0.46	0.07	-1.33	1.34	-2.53	0.72	-3.86	1.44	-17.91	1.53	-4.63
	11	12	MET	244	7.36	1.87	10.08	1.15	17.44	2.33	-4.49	0.82	-1.01	0.61	-5.5	1.08	-0.01	0.64	2.31	0.94	2.3	1.1	2.86	2.02	11.38	1.58	14.24	2.47	-0.24	0.5	-5.6	0.76	-5.84	0.79	0.33	0.08	0.19	0.03	0.52	0.09	0.09	0.52	-5.41	0.76	-5.33	0.81	2.95	1.95	5.96
	12	13	LYS	245	10.99	2.41	12.08	1.33	23.07	2.6	-1.88	1.06	-0.46	0.79	-2.34	1.35	-30.96	7.55	-3.58	0.94	-34.54	7.3	-21.85	7.97	8.04	1.58	-13.81	7.95	3.11	6.97	-5.31	0.93	-2.21	6.92	0.59	0.1	0.25	0.05	0.84	0.12	3.69	6.9	-5.06	0.89	-1.37	6.84	-18.15	2.93	2.97
	13	14	HIS	246	25.53	1.97	10.16	1.31	35.69	2.37	-3.53	0.73	-0.85	0.81	-4.38	1.24	-14.34	1.9	-4.32	0.92	-18.66	2.04	7.67	2.37	4.98	1.76	12.65	2.81	-2.39	1.2	-4.7	0.68	-7.09	1.21	0.61	0.07	0.07	0.03	0.68	0.07	-1.78	1.18	-4.63	0.66	-6.41	1.18	5.89	2.04	0.36
	14	15	LYS	247	11.33	2.41	10.44	1.27	21.77	2.77	-3.09	1.1	-1.88	0.72	-4.96	1.38	-29.29	9.46	-3.8	1.63	-33.09	9.38	-21.05	9.29	4.76	1.95	-16.28	9.31	1.85	8.88	-3.13	1.31	-1.28	8.81	0.44	0.07	0.12	0.03	0.57	0.08	2.29	8.85	-3.01	1.29	-0.71	8.78	-18.75	2.58	1.76
	15	16	LEU	248	8.68	1.73	10.68	1.48	19.36	2.36	-4.36	0.81	-2.13	0.78	-6.49	1.21	-25.78	0.39	-5.89	1.4	-31.67	1.33	-21.47	2.07	2.66	1.94	-18.8	2.84	2.07	0.26	-5.01	0.83	-2.95	0.8	0.02	0.01	0	0.01	0.02	0.02	2.08	0.26	-5.01	0.83	-2.93	0.79	-19.38	2.05	-2.35
	16	17	GLY	249	0	0	9.4	1.54	9.4	1.54	0	0	-2.21	0.7	-2.21	0.7	0	0	-8.29	1.55	-8.29	1.55	0	0	-1.11	1.99	-1.11	1.99	0	0	-4.45	0.93	-4.45	0.93	0	0	0.15	0.06	0.15	0.06	0	0	-4.3	0.92	-4.3	0.92	0	0	-5.41
	17	18	GLY	250	0	0	8.74	1.51	8.74	1.51	0	0	-0.67	0.72	-0.67	0.72	0	0	-5.94	1.77	-5.94	1.77	0	0	2.13	2.05	2.13	2.05	0	0	-6.23	1.7	-6.23	1.7	0	0	0.5	0.09	0.5	0.09	0	0	-5.73	1.63	-5.73	1.63	0	0	-3.59
	18	19	GLY	251	0	0	9.23	1.49	9.23	1.49	0	0	-1.48	0.74	-1.48	0.74	0	0	-5.55	1.31	-5.55	1.31	0	0	2.21	2.08	2.21	2.08	0	0	-5.63	1.16	-5.63	1.16	0	0	0.24	0.07	0.24	0.07	0	0	-5.38	1.12	-5.38	1.12	0	0	-3.18
	19	20	GLN	252	14.04	2.32	9.86	1.44	23.9	2.92	-2.5	0.93	-1.62	0.87	-4.12	1.39	-65.55	2.31	-4.41	0.88	-69.96	2.51	-54.01	3.12	3.82	1.56	-50.19	3.7	-8.04	1.56	-4.88	0.61	-12.92	1.82	0.51	0.11	0.01	0.02	0.52	0.11	-7.53	1.5	-4.87	0.61	-12.39	1.75	-61.54	2.59	-1.04
	20	21	TYR	253	8.68	2.12	8.27	1.35	16.96	2.59	-4.07	0.68	-1.21	0.8	-5.27	1.15	-17.63	1.04	-2.26	0.99	-19.9	1.58	-13.02	2.38	4.8	1.56	-8.22	2.99	-2.83	0.66	-5.27	0.68	-8.1	0.92	0.09	0.03	0.01	0.01	0.1	0.03	-2.74	0.65	-5.26	0.68	-8	0.92	-15.76	2.25	-0.45
	21	22	GLY	254	0	0	7.96	1.42	7.96	1.42	0	0	-1.84	0.8	-1.84	0.8	0	0	-12.76	2.02	-12.76	2.02	0	0	-6.64	2.67	-6.64	2.67	0	0	0.02	1.47	0.02	1.47	0	0	0.06	0.03	0.06	0.03	0	0	0.08	1.47	0.08	1.47	0	0	-6.55
	22	23	GLU	255	7	2.13	11.05	1.31	18.06	2.64	-1.02	1.15	-1.88	0.76	-2.9	1.58	-23.3	17.54	-1.76	1.69	-25.06	18.37	-17.31	17.19	7.41	2.05	-9.9	18.15	-40.88	16.41	-7.36	1.11	-48.24	17.01	0.4	0.07	0.05	0.02	0.45	0.07	-40.48	16.38	-7.3	1.09	-47.78	16.97	-57.8	2.16	0.11
	23	24	VAL	256	6.15	1.42	10.52	1.1	16.68	1.83	-3.72	0.65	-1.18	0.88	-4.9	1.13	-18.47	0.52	-10.87	1.11	-29.34	1.08	-16.03	1.61	-1.54	1.38	-17.56	2.08	3.7	0.4	-3.13	0.63	0.58	0.36	0.01	0.01	0	0	0.01	0.01	3.71	0.4	-3.13	0.63	0.59	0.36	-12.32	1.57	-4.66
	24	25	TYR	257	8.28	1.92	9.98	1.17	18.26	2.41	-4.4	0.77	-2.03	0.93	-6.43	1.2	-17.73	1.28	-11.26	0.82	-28.99	1.62	-13.85	2.25	-3.31	1.34	-17.16	2.78	-3.73	0.88	-2.61	0.35	-6.34	0.94	0.3	0.06	0	0	0.3	0.06	-3.43	0.88	-2.61	0.35	-6.04	0.94	-17.28	2.05	-5.92
	25	26	GLU	258	6.05	1.76	9.34	1.23	15.4	2.33	-3.4	1.06	-2.06	0.93	-5.46	1.41	-19.34	7.19	-8.32	1.65	-27.66	7.33	-16.69	7.12	-1.03	1.92	-17.73	7.37	-40.73	6.67	-2.44	0.92	-43.18	6.74	0.1	0.04	0	0	0.1	0.04	-40.63	6.64	-2.44	0.92	-43.07	6.71	-57.32	1.84	-3.48
	26	27	GLY	259	0	0	8.03	1.38	8.03	1.38	0	0	-3.23	0.85	-3.23	0.85	0	0	-8.46	0.99	-8.46	0.99	0	0	-3.66	1.64	-3.66	1.64	0	0	-2.06	0.73	-2.06	0.73	0	0	0	0	0	0	0	0	-2.06	0.73	-2.06	0.73	0	0	-5.72
	27	28	VAL	260	6.12	1.66	9.68	1.09	15.8	2.17	-1.75	0.77	-1.58	0.71	-3.33	1.13	-17.2	0.53	-11.62	1.09	-28.82	1.07	-12.83	1.93	-3.52	1.55	-16.35	2.5	1.95	0.49	-2.53	0.72	-0.58	0.62	0.3	0.05	0	0	0.3	0.05	2.25	0.49	-2.53	0.72	-0.28	0.6	-10.58	1.85	-6.05
	28	29	TRP	261	11.58	2.23	11.22	1.21	22.81	2.73	-6.7	0.71	-2.74	0.86	-9.45	1.18	4.54	2.53	-5.72	1.18	-1.18	3.19	9.42	3.75	2.76	1.6	12.18	4.57	0.05	1.65	-0.79	0.48	-0.74	1.95	0.27	0.06	0	0	0.27	0.06	0.32	1.63	-0.79	0.48	-0.47	1.93	9.74	2.78	1.97
	29	30	LYS	262	11.2	2.35	12.17	1.57	23.37	3.02	-2.1	1.15	-0.92	0.78	-3.01	1.47	-17.23	8.06	-0.05	1.57	-17.28	8.68	-8.13	8.64	11.21	2.18	3.08	9.53	-9.3	7.8	-3.98	1.03	-13.28	8	0.74	0.1	0.12	0.03	0.86	0.09	-8.56	7.74	-3.86	1.01	-12.42	7.94	-16.69	2.86	7.35
	30	31	LYS	263	11.35	2.53	11.4	1.43	22.75	3.01	-2.18	0.85	-0.41	0.7	-2.59	1.2	-12.23	9.59	-9.35	1.8	-21.58	10.01	-3.06	10.17	1.64	2.11	-1.42	10.64	-14.89	9.11	-4.4	1.1	-19.28	9.36	0.77	0.1	0.24	0.03	1.02	0.1	-14.12	9.1	-4.15	1.09	-18.27	9.34	-17.18	2.94	-2.51
	31	32	TYR	264	8.31	1.94	9.58	1.36	17.9	2.17	-0.42	0.68	0.11	0.73	-0.3	1.04	-17.54	0.91	-8.5	0.97	-26.03	1.39	-9.64	2.37	1.19	1.43	-8.44	2.71	-4.93	0.79	-6.13	0.62	-11.06	1.04	0.84	0.07	0.19	0.02	1.03	0.07	-4.09	0.76	-5.94	0.61	-10.02	1.01	-13.73	2.14	-4.74
	32	33	SER	265	3.38	0.98	10.8	1.39	14.18	1.75	-0.18	0.4	-0.1	0.63	-0.28	0.84	-2.84	1.02	-3.49	1.63	-6.33	2.03	0.35	1.52	7.22	2.17	7.57	2.64	-2.78	0.96	-7.62	1.02	-10.41	1.38	0.56	0.03	0.18	0.03	0.74	0.05	-2.22	0.95	-7.44	1	-9.66	1.36	-1.87	1.08	-0.22
	33	34	LEU	266	8.86	1.63	10.75	1.29	19.61	2.13	-0.89	0.82	-0.88	0.7	-1.77	1.1	-26.04	0.51	-6.8	0.98	-32.84	0.96	-18.08	1.77	3.07	1.53	-15.01	2.27	2.02	0.43	-2.62	0.51	-0.59	0.45	0.6	0.08	0.03	0.02	0.63	0.07	2.62	0.43	-2.59	0.51	0.04	0.44	-15.46	1.73	0.48
	34	35	THR	267	6.64	1.31	10.22	1.46	16.86	2.02	-2.27	0.6	-1.39	0.62	-3.66	0.94	-23.01	1.15	-8	0.84	-31.01	1.32	-18.63	1.67	0.82	1.38	-17.81	2.26	-0.77	0.8	-5.47	0.66	-6.24	0.81	0.3	0.04	0.04	0.02	0.34	0.04	-0.46	0.8	-5.43	0.65	-5.9	0.81	-19.1	1.4	-4.61
	35	36	VAL	268	5.62	1.62	9.66	1.13	15.28	2.17	-4.12	0.69	-1.42	0.92	-5.54	1.27	-18.94	0.5	-10.35	1.02	-29.3	1.05	-17.45	1.87	-2.12	1.54	-19.57	2.49	3.65	0.42	-3.76	0.65	-0.1	0.45	0	0	0	0	0	0	3.65	0.42	-3.76	0.65	-0.1	0.45	-13.8	1.81	-5.87
	36	37	ALA	269	2.75	0.92	10.24	1.4	12.99	1.75	-1.91	0.32	-2.62	0.84	-4.52	0.87	2.22	0.12	-6.79	0.9	-4.57	0.91	3.06	1.02	0.83	1.57	3.89	1.95	-0.17	0.05	-0.96	0.34	-1.13	0.35	0.02	0.01	0	0	0.02	0.01	-0.15	0.05	-0.96	0.34	-1.11	0.35	2.91	1.01	-0.13
	37	38	VAL	270	5.98	1.58	10.41	1.21	16.39	2.2	-3.64	0.76	-1.05	1.01	-4.69	1.42	-18.91	0.53	-4.88	0.95	-23.79	0.88	-16.57	1.74	4.47	1.57	-12.1	2.39	3.47	0.39	-3.6	0.55	-0.13	0.33	0	0	0	0	0	0	3.47	0.39	-3.6	0.55	-0.13	0.32	-13.1	1.74	0.87
	38	39	LYS	271	10.62	2.61	10.8	1.13	21.41	3.02	-3.03	0.82	-1.96	0.82	-4.99	1.14	-70.48	8.52	-10.22	1.07	-80.7	8.85	-62.89	8.55	-1.39	1.36	-64.28	8.96	42.44	7.57	-1.23	0.53	41.21	7.8	0.24	0.07	0	0	0.24	0.07	42.68	7.54	-1.23	0.53	41.45	7.76	-20.21	2.72	-2.62
	39	40	THR	272	6.12	1.16	10.42	1.14	16.54	1.78	-3.2	0.7	-2.15	0.72	-5.34	1.22	-22.92	0.87	-10.96	1.28	-33.89	1.43	-20	1.41	-2.69	1.69	-22.69	2.14	-1.3	0.54	-5.4	1.08	-6.7	1.17	0.05	0.03	0.03	0.02	0.08	0.04	-1.25	0.55	-5.37	1.07	-6.63	1.17	-21.25	1.31	-8.07
	40	41	LEU	273	8.96	1.64	10.58	1.21	19.54	2.06	-3.2	1.1	-0.35	0.84	-3.54	1.47	-28.73	0.44	8.05	1.26	-20.68	1.23	-22.97	1.96	18.29	1.72	-4.68	2.46	4.51	0.38	-10.23	0.79	-5.72	0.72	0.14	0.06	0.06	0.02	0.21	0.06	4.66	0.35	-10.17	0.79	-5.51	0.73	-18.31	1.89	8.12
	41	42	LYS	274	11.37	2.3	12.96	1.67	24.32	2.94	-1.1	1.13	-0.69	0.72	-1.8	1.38	-39.22	12.22	-9.67	0.96	-48.88	12.16	-28.96	12.61	2.6	1.73	-26.36	12.88	11.07	11.26	-4.53	0.72	6.54	11.28	0.67	0.09	0.13	0.03	0.8	0.09	11.75	11.27	-4.41	0.71	7.34	11.28	-17.21	2.91	-1.81
	42	43	GLU	275	5.76	1.88	9.52	1.21	15.28	2.31	-0.79	0.65	0.15	1.01	-0.63	1.31	39.32	8.84	-8.31	1.6	31.02	9.16	44.3	8.86	1.36	1.9	45.66	8.75	-102.66	8.83	-9.71	1.05	-112.37	8.62	0.8	0.08	0.04	0.02	0.83	0.08	-101.87	8.78	-9.67	1.05	-111.54	8.58	-57.57	1.79	-8.31
	43	44	ASP	276	4.26	1.29	10.47	1.21	14.73	2	-1.04	0.5	-0.22	0.64	-1.26	0.92	32.62	2.89	5.79	2	38.41	3.71	35.83	3.19	16.04	2.03	51.88	4.04	-97.66	3.25	-18.12	1.44	-115.78	3.96	0.62	0.07	0.19	0.04	0.82	0.07	-97.04	3.23	-17.92	1.46	-114.96	3.95	-61.2	1.13	-1.88
	44	45	THR	277	6.19	1.64	10.59	1.22	16.78	2.2	-1.59	0.73	-0.39	0.64	-1.98	1	-25.12	1.05	-4.26	1.61	-29.38	1.94	-20.52	2.02	5.95	1.89	-14.58	2.75	1.42	0.97	-8.27	1.3	-6.85	1.15	0.24	0.08	0.08	0.03	0.33	0.07	1.66	0.96	-8.18	1.29	-6.52	1.14	-18.86	1.92	-2.24
	45	46	MET	278	7.45	1.56	11.07	1.4	18.53	2.21	-0.45	0.51	0.09	0.73	-0.36	1.06	-2.33	0.97	-2.25	1.79	-4.58	1.95	4.67	1.78	8.91	2.1	13.58	2.77	1.24	0.92	-9.26	1.42	-8.03	1.64	1.22	0.06	0.17	0.05	1.38	0.09	2.45	0.92	-9.1	1.41	-6.64	1.63	7.13	1.53	-0.19
	46	47	GLU	279	6.66	2.04	10.64	1.54	17.3	2.73	-1.08	0.73	-0.32	0.95	-1.41	1.16	50.47	4.92	1.21	2.14	51.68	6.05	56.05	5.69	11.52	2.63	67.57	6.95	-112.91	5.23	-11.59	1.27	-124.5	5.95	0.73	0.09	0.04	0.02	0.78	0.1	-112.18	5.22	-11.54	1.27	-123.72	5.93	-56.13	1.8	-0.02
	47	48	VAL	280	6.61	1.81	10.9	1.43	17.51	2.61	-1.5	0.83	-0.22	0.86	-1.72	1.22	-21.72	0.51	-10.44	1.32	-32.16	1.43	-16.61	2.05	0.24	1.77	-16.37	3.01	7.1	0.42	-6.53	0.8	0.57	0.92	0.25	0.06	0	0	0.25	0.06	7.35	0.4	-6.53	0.8	0.82	0.89	-9.26	1.93	-6.29
	48	49	GLU	281	6.41	1.86	10.64	1.38	17.05	2.42	-0.76	0.64	-0.49	0.8	-1.25	1.13	41.58	6.05	-6.48	1.57	35.1	6.51	47.22	6.17	3.67	1.98	50.9	6.87	-105.17	5.79	-7.64	1.42	-112.8	6.39	0.88	0.08	0.09	0.04	0.97	0.09	-104.28	5.81	-7.55	1.41	-111.83	6.4	-57.06	1.69	-3.87
	49	50	GLU	282	6.26	1.8	10.55	1.21	16.81	2.15	-1.18	0.67	-0.64	0.76	-1.83	1.15	41.47	8.45	-1.66	1.49	39.81	8.63	46.55	8.72	8.24	1.75	54.79	9.08	-104.3	8.54	-9.35	1.28	-113.66	8.67	0.77	0.1	0.08	0.04	0.85	0.1	-103.53	8.5	-9.28	1.27	-112.81	8.63	-56.98	1.65	-1.04
	50	51	PHE	283	7.95	1.83	11.33	1.19	19.27	2.4	-4.29	0.77	-1.91	0.82	-6.19	1.23	1.27	0.36	-5.16	1.29	-3.89	1.43	4.93	2.06	4.26	1.7	9.19	2.96	-0.77	0.29	-2.95	0.79	-3.72	0.9	0.15	0.05	0.06	0.03	0.22	0.06	-0.62	0.29	-2.89	0.78	-3.51	0.88	4.32	2.07	1.37
	51	52	LEU	284	9.15	1.89	11.25	1.49	20.4	2.56	-1.45	0.88	-0.94	0.83	-2.39	1.31	-26.93	0.56	-1.4	1.12	-28.33	1.15	-19.23	2.13	8.91	1.67	-10.32	2.91	3.05	0.37	-2.41	0.74	0.63	0.65	0.37	0.08	0.01	0.01	0.38	0.08	3.41	0.38	-2.4	0.73	1.01	0.64	-15.82	2.14	6.51
	52	53	LYS	285	11.5	2.31	11.14	1.38	22.65	2.92	-0.92	0.75	-1.04	0.75	-1.96	1.01	-43.31	10.4	-12.64	1.42	-55.94	10.27	-32.73	11.21	-2.53	1.95	-35.26	11.34	15.66	9.73	-0.57	1.12	15.09	9.37	1.01	0.07	0.04	0.02	1.05	0.07	16.67	9.69	-0.53	1.11	16.14	9.33	-16.06	2.63	-3.06
	53	54	GLU	286	6.17	2.04	11.05	1.23	17.22	2.59	-1.58	0.77	-1.08	0.75	-2.66	1.11	17.92	10.86	-11.52	1.48	6.4	11.08	22.51	10.74	-1.55	1.88	20.96	11.16	-78.48	10.45	-5.75	0.98	-84.22	10.81	0.35	0.1	0.04	0.02	0.4	0.11	-78.12	10.37	-5.7	0.97	-83.82	10.72	-55.61	1.87	-7.25
	54	55	ALA	287	2.64	0.75	10.9	1.41	13.54	1.78	-1.71	0.36	-2.2	0.8	-3.91	0.92	2.31	0.13	-8.63	1.22	-6.33	1.25	3.24	0.88	0.06	1.87	3.3	2.22	-0.34	0.07	0.31	0.94	-0.03	0.96	0.02	0.01	0	0.01	0.02	0.01	-0.33	0.08	0.31	0.94	-0.01	0.96	2.91	0.88	0.38
	55	56	ALA	288	2.97	0.86	10.97	1.33	13.94	1.76	-0.9	0.25	-1.61	0.66	-2.51	0.74	2.17	0.14	-3.52	1.55	-1.35	1.56	4.24	0.91	5.83	1.98	10.08	2.28	-0.14	0.08	-3.47	1.63	-3.61	1.63	0.32	0.04	0.07	0.04	0.39	0.05	0.17	0.09	-3.4	1.61	-3.23	1.61	4.42	0.9	2.44
	56	57	VAL	289	6.44	1.76	11.49	1.43	17.93	2.67	-0.95	0.71	-0.46	0.83	-1.41	1.14	-20.14	0.66	-9.91	1.35	-30.05	1.16	-14.66	1.91	1.12	1.57	-13.53	2.64	4.92	0.61	-4.73	0.74	0.19	0.53	0.41	0.07	0.01	0.01	0.41	0.07	5.33	0.62	-4.73	0.73	0.6	0.53	-9.33	1.88	-3.6
	57	58	MET	290	7.69	1.84	10.65	1.33	18.33	2.52	-4.68	0.57	-2.16	0.72	-6.84	0.93	-1.14	1.06	-2.58	1.04	-3.72	1.34	1.87	2.03	5.9	1.69	7.77	2.8	0.94	0.93	-3.01	0.83	-2.07	1.11	0.22	0.04	0.01	0.01	0.23	0.04	1.17	0.94	-3	0.83	-1.84	1.11	3.04	1.85	2.9
	58	59	LYS	291	11.06	2.27	10.57	1.33	21.63	2.82	-3.16	0.77	-0.82	0.73	-3.99	1.02	-15.77	7.31	-12.25	1.3	-28.01	7.26	-7.87	7.42	-2.5	1.85	-10.37	7.57	-9.77	6.87	-0.54	1.15	-10.3	6.74	0.58	0.1	0.09	0.04	0.67	0.11	-9.19	6.81	-0.45	1.13	-9.64	6.67	-17.06	2.35	-2.95
	59	60	GLU	292	6.01	1.7	11.16	1.41	17.17	2.33	-1.58	0.5	-0.58	0.77	-2.15	1	14.33	4.8	-12.01	1.98	2.32	5.83	18.76	5.06	-1.42	2.22	17.34	5.98	-77.37	4.91	-3.42	1.69	-80.79	5.88	0.76	0.05	0.13	0.03	0.89	0.07	-76.61	4.89	-3.3	1.66	-79.9	5.84	-57.85	1.53	-4.72
	60	61	ILE	293	9.74	2.03	11.12	1.16	20.86	2.39	-2.04	0.98	-0.61	0.78	-2.65	1.42	-5.95	0.42	3.95	1	-2	0.95	1.74	2.18	14.47	1.31	16.21	2.77	3.91	0.39	-7.7	0.68	-3.79	0.61	0.12	0.04	0.02	0.01	0.14	0.05	4.03	0.4	-7.68	0.68	-3.65	0.6	5.77	2.21	6.79
	61	62	LYS	294	11.15	2.26	10.63	1.22	21.77	2.58	-1.89	0.97	-1.35	0.69	-3.24	1.22	-13.3	8.25	-2.55	1.11	-15.85	7.8	-4.05	8.77	6.73	1.56	2.68	8.22	-11.61	8.5	-3.6	1.01	-15.21	8.02	0.68	0.13	0.09	0.02	0.77	0.13	-10.93	8.43	-3.51	1	-14.44	7.95	-14.98	2.46	3.22
	62	63	HIS	295	24.84	2.03	10.93	1.3	35.77	2.4	-6.82	0.75	-0.45	0.79	-7.27	1.09	-13.76	1.73	-0.12	1	-13.88	2.33	4.26	2.62	10.36	1.69	14.62	3.31	-1.16	1.54	-4.69	0.68	-5.85	1.93	0.2	0.04	0.04	0.02	0.25	0.04	-0.96	1.52	-4.65	0.68	-5.61	1.92	3.3	2.11	5.71
	63	64	PRO	296	12.33	1.26	13.89	1.29	26.23	2.03	-0.94	0.49	-1.02	0.64	-1.97	0.78	-6.42	1.31	-3.69	1.65	-10.12	1.12	4.97	1.82	9.18	1.81	14.14	2.2	5.77	1.27	-7.69	1.32	-1.92	0.81	0.68	0.03	0.09	0.03	0.77	0.04	6.46	1.27	-7.6	1.3	-1.15	0.8	11.42	1.33	1.57
	64	65	ASN	297	11.29	1.56	10.37	1.36	21.66	2.05	-3.99	0.63	-1.61	0.93	-5.6	1.12	-82.21	1.71	-7.51	1.02	-89.72	1.78	-74.91	2.02	1.25	1.36	-73.67	2.36	-3.48	1.06	-1.09	0.4	-4.57	0.93	0.14	0.02	0	0	0.14	0.02	-3.34	1.06	-1.09	0.4	-4.43	0.92	-78.25	1.62	0.16
	65	66	LEU	298	8.76	1.88	10.65	1.24	19.41	2.49	-2.95	0.9	-2.21	0.72	-5.16	1.14	-27.41	0.45	-1.53	1.12	-28.95	1.09	-21.6	2.21	6.91	1.9	-14.69	3.22	3.53	0.3	-4.32	0.7	-0.78	0.53	0.15	0.03	0	0	0.15	0.03	3.69	0.3	-4.31	0.7	-0.63	0.52	-17.91	2.22	2.6
	66	67	VAL	299	6.33	1.35	10.62	1.19	16.95	1.85	-2.78	0.63	-1.11	0.8	-3.89	1.04	-20.8	0.41	-6.97	0.87	-27.77	0.99	-17.25	1.51	2.53	1.35	-14.72	1.96	5.64	0.33	-8.92	0.6	-3.29	0.64	0.05	0.02	0.03	0.02	0.07	0.03	5.68	0.33	-8.9	0.59	-3.22	0.63	-11.57	1.46	-6.36
	67	68	GLN	300	14.33	2.14	11.36	1.33	25.69	2.49	-2.81	0.82	-2.53	0.7	-5.33	1.15	-71.81	4.56	-4.56	0.96	-76.36	4.68	-60.28	4.77	4.28	1.46	-56.01	5.07	-2.2	3.75	-4.12	0.51	-6.32	3.82	0.38	0.08	0.01	0.01	0.39	0.08	-1.82	3.71	-4.11	0.51	-5.93	3.78	-62.1	2.08	0.17
	68	69	LEU	301	9.23	1.64	10.67	1.34	19.9	2.41	-4.1	0.96	-2.45	0.67	-6.54	1.2	-26.28	0.47	-0.36	1.43	-26.64	1.38	-21.15	1.64	7.86	1.8	-13.29	2.46	2.43	0.37	-4.3	1.07	-1.87	0.96	0	0	0.02	0.02	0.02	0.02	2.44	0.37	-4.28	1.06	-1.85	0.95	-18.71	1.64	3.57
	69	70	LEU	302	8.53	1.82	10.76	1.38	19.28	2.31	-3.37	0.77	-1.42	0.69	-4.79	0.99	-25.84	0.45	-3.32	1.06	-29.16	0.97	-20.68	2.08	6.02	1.56	-14.66	2.4	2.39	0.36	-5.54	0.89	-3.15	0.72	0.18	0.04	0.08	0.03	0.26	0.05	2.57	0.35	-5.46	0.87	-2.89	0.7	-18.11	2.02	0.56
	70	71	GLY	303	0	0	8.11	1.28	8.11	1.28	0	0	-3.57	0.86	-3.57	0.86	0	0	-11.13	0.85	-11.13	0.85	0	0	-6.59	1.34	-6.59	1.34	0	0	-0.85	0.38	-0.85	0.38	0	0	0	0	0	0	0	0	-0.85	0.38	-0.85	0.38	0	0	-7.44
	71	72	VAL	304	6.14	1.63	9.66	1.45	15.8	2.34	-2.33	0.87	-1.81	0.91	-4.13	1.43	-18.91	0.62	-10.36	1.32	-29.27	1.23	-15.1	1.82	-2.51	1.94	-17.61	2.76	3.52	0.45	-4.73	0.91	-1.22	0.7	0.08	0.04	0	0	0.08	0.04	3.59	0.47	-4.73	0.91	-1.14	0.69	-11.51	1.82	-7.24
	72	73	CYS	305	3.11	0.93	10.84	1.44	13.96	1.83	-3.02	0.48	-2.35	0.71	-5.37	0.85	6.18	0.84	-6.45	1.33	-0.26	1.67	6.28	1.34	2.05	1.72	8.33	2.4	-1.5	0.58	-2.17	0.78	-3.67	0.95	0.05	0.03	0.01	0.01	0.06	0.04	-1.45	0.58	-2.16	0.78	-3.61	0.94	4.83	1.17	-0.11
	73	74	THR	306	6.25	1.49	11.13	1.27	17.38	1.98	-1.56	0.72	-0.39	0.87	-1.96	1.32	-23.99	2	1.03	1.61	-22.95	2.69	-19.3	2.47	11.77	1.83	-7.53	3.2	-0.18	1.18	-7.73	1.21	-7.91	1.65	0.18	0.06	0.07	0.03	0.26	0.07	0.01	1.15	-7.66	1.21	-7.65	1.61	-19.29	1.77	4.11
	74	75	ARG	307	12.84	2.76	10.85	1.48	23.7	3.23	-1.02	1.05	0.32	0.59	-0.69	1.25	-205.19	7.74	-4.36	1.31	-209.55	7.54	-193.36	7.77	6.82	1.92	-186.55	7.75	13.85	6.94	-7.57	1.2	6.28	6.82	1.02	0.08	0.23	0.03	1.25	0.09	14.87	6.96	-7.34	1.19	7.53	6.84	-178.49	2.81	-0.52
	75	76	GLU	308	5.73	1.6	11.23	1.33	16.95	2.3	-0.41	0.93	0.49	0.73	0.08	1.13	6.52	7.98	0.86	1.5	7.39	8.41	11.84	7.72	12.57	2.17	24.42	8.39	-71.21	7.14	-7.93	1.25	-79.14	7.42	0.67	0.08	0.05	0.02	0.73	0.09	-70.53	7.09	-7.88	1.25	-78.42	7.36	-58.69	1.88	4.69
	76	77	PRO	309	12.25	1.36	14.18	1.27	26.43	1.9	-1.9	0.62	0.15	0.62	-1.74	0.89	-11.95	0.82	15.52	1.17	3.58	1.06	-1.59	1.57	29.85	1.68	28.26	2.15	11.43	0.79	-16.58	1.01	-5.15	0.96	0.37	0.07	0.13	0.02	0.5	0.07	11.8	0.76	-16.45	1.01	-4.65	0.96	10.2	1.48	13.4
	77	78	PRO	310	12.1	1.21	12.85	1.08	24.95	1.77	-2.43	0.52	-1.61	0.68	-4.04	0.84	-9.95	1.11	6.65	1.58	-3.3	1.23	-0.28	1.69	17.89	1.67	17.61	1.87	9.19	1.11	-13.19	1.45	-4	0.93	0.36	0.06	0.01	0.01	0.37	0.06	9.55	1.11	-13.18	1.45	-3.63	0.94	9.27	1.33	4.71
	78	79	PHE	311	8.74	1.7	9.64	1.09	18.38	2.07	-2.25	0.76	-2.13	0.73	-4.38	1.18	0.76	0.52	-6.98	1.19	-6.22	1.22	7.24	1.91	0.53	1.53	7.78	2.18	-0.74	0.35	-2.62	0.72	-3.36	0.78	0.27	0.05	0	0	0.28	0.05	-0.47	0.32	-2.62	0.72	-3.09	0.76	6.78	1.84	-2.09
	79	80	TYR	312	9.77	2.09	10.27	1.49	20.05	2.61	-3.76	0.8	-3.5	0.53	-7.25	0.95	-17.83	1.34	-6.8	0.97	-24.63	1.71	-11.81	2.76	-0.03	1.69	-11.84	3.45	-2.86	1.08	-1.73	0.42	-4.58	1.14	0.25	0.07	0	0	0.25	0.07	-2.6	1.04	-1.72	0.42	-4.33	1.11	-14.42	2.43	-1.75
	80	81	ILE	313	9.44	2.08	10.45	1.22	19.88	2.56	-3.28	1.03	-1.49	0.83	-4.77	1.28	-5.51	0.35	-6.52	0.8	-12.03	0.81	0.65	2.17	2.44	1.4	3.09	2.68	3.62	0.33	-3.93	0.45	-0.31	0.33	0.01	0.01	0	0	0.01	0.01	3.64	0.33	-3.93	0.45	-0.3	0.33	4.28	2.15	-1.5
	81	82	ILE	314	10.27	2.17	10.48	1.08	20.74	2.53	-4.91	0.99	-1.63	0.9	-6.54	1.43	-4.85	0.33	-9.31	0.98	-14.16	0.95	0.51	2.18	-0.46	1.56	0.05	2.6	2.97	0.29	-3.29	0.44	-0.32	0.34	0	0	0	0	0	0	2.97	0.29	-3.29	0.44	-0.32	0.34	3.48	2.13	-3.75
	82	83	ILE	315	9.56	1.87	10.1	1.3	19.66	2.44	-3.19	1.03	-1.68	0.93	-4.87	1.36	-6.09	0.33	-11.87	0.84	-17.95	0.87	0.28	2.03	-3.45	1.44	-3.17	2.43	3.92	0.28	-3.15	0.46	0.78	0.43	0.1	0.04	0	0	0.1	0.04	4.02	0.29	-3.15	0.46	0.87	0.44	4.3	1.92	-6.6
	83	84	GLU	316	6.46	1.82	10.13	1.28	16.59	2.39	-3.09	1.18	-2.36	0.65	-5.45	1.26	-13.37	6.48	-0.82	0.89	-14.19	6.44	-10	6.41	6.95	1.26	-3.05	6.59	-48.73	5.51	-8.53	0.65	-57.26	5.58	0.16	0.03	0.02	0.01	0.18	0.03	-48.58	5.5	-8.51	0.64	-57.08	5.57	-58.58	2.23	-1.56
	84	85	PHE	317	7.79	1.62	9.81	1.16	17.59	2.03	-3.73	0.61	-2.21	0.59	-5.94	0.94	0.33	0.4	-0.68	1.16	-0.36	1.2	4.38	1.82	6.91	1.54	11.3	2.55	-0.25	0.38	-6.53	0.85	-6.78	0.92	0.16	0.04	0.11	0.02	0.28	0.04	-0.09	0.37	-6.41	0.85	-6.5	0.9	4.29	1.82	0.5
	85	86	MET	318	6.69	1.9	11.49	1.19	18.18	2.39	-6.35	0.74	-2.16	0.71	-8.51	1.09	-1.37	0.57	-5.4	0.91	-6.77	1.1	-1.03	1.93	3.92	1.48	2.89	2.41	1.39	0.37	-2.84	0.54	-1.46	0.6	0.03	0.02	0.01	0	0.04	0.02	1.41	0.37	-2.83	0.54	-1.42	0.6	0.38	1.91	1.09
	86	87	THR	319	7.03	1.58	13.08	1.3	20.11	2.2	-1.34	0.84	-1.53	0.78	-2.87	1.35	-25.99	3.65	-11	1.35	-36.98	4.24	-20.29	3.81	0.55	1.61	-19.74	4.41	1.17	1.83	-4.58	1.28	-3.4	2.52	0.35	0.07	0.04	0.02	0.39	0.08	1.52	1.78	-4.54	1.27	-3.02	2.47	-18.77	2.34	-3.98
	87	88	TYR	320	9.33	2.11	9.12	1.5	18.45	2.68	-2.84	0.98	-2.07	0.73	-4.92	1.24	-17.93	0.75	-3.9	0.89	-21.83	1.07	-11.45	2.47	3.15	1.49	-8.3	2.73	-3.86	0.73	-5.4	0.7	-9.27	0.89	0.47	0.09	0.01	0.01	0.48	0.09	-3.4	0.67	-5.4	0.7	-8.79	0.86	-14.84	2.32	-2.25
	88	89	GLY	321	0	0	8.27	1.47	8.27	1.47	0	0	-3.4	0.91	-3.4	0.91	0	0	-8.27	1.25	-8.27	1.25	0	0	-3.39	1.55	-3.39	1.55	0	0	-3.98	0.87	-3.98	0.87	0	0	0	0	0	0	0	0	-3.97	0.87	-3.97	0.87	0	0	-7.37
	89	90	ASN	322	12.46	1.89	10.61	1.46	23.06	2.46	-4.23	0.9	-2.99	0.76	-7.22	1.4	-78.1	1.76	-2.05	1.35	-80.15	2.34	-69.88	2.16	5.56	1.75	-64.31	3.02	-6.87	1.11	-4.36	0.85	-11.22	1.58	0.08	0.03	0.01	0.01	0.09	0.03	-6.79	1.11	-4.35	0.84	-11.14	1.58	-76.66	1.8	1.21
	90	91	LEU	323	8.45	1.59	11.08	1.21	19.54	2.03	-4.51	0.79	-2.46	1	-6.97	1.32	-27.86	0.3	-1.6	0.88	-29.46	0.85	-23.92	1.91	7.01	1.48	-16.9	2.45	4.1	0.19	-6.48	0.5	-2.38	0.44	0	0	0	0	0	0	4.1	0.19	-6.48	0.5	-2.38	0.44	-19.82	1.91	0.53
	91	92	LEU	324	8.27	1.67	11.58	1.19	19.85	2.02	-2.61	0.9	-2.74	0.86	-5.35	1.3	-27.47	0.47	-4.94	1.03	-32.41	1.23	-21.82	2.03	3.91	1.65	-17.91	2.62	3.51	0.29	-6.97	0.54	-3.47	0.66	0.18	0.05	0	0	0.18	0.05	3.69	0.3	-6.97	0.54	-3.28	0.65	-18.13	1.99	-3.07
	92	93	ASP	325	4.35	1.44	10.47	1.27	14.82	1.97	-1.97	0.37	-2.19	0.78	-4.16	0.91	25.43	6.38	1.42	1.48	26.85	7.24	27.81	6.65	9.7	1.76	37.51	7.61	-89.21	6.5	-16.25	1.41	-105.46	7.49	0.48	0.05	0.01	0.01	0.49	0.05	-88.74	6.5	-16.24	1.41	-104.97	7.49	-60.92	1.32	-6.54
	93	94	TYR	326	8.62	2.27	11.4	1.1	20.01	2.62	-4.41	0.84	-2.48	0.86	-6.89	1.23	-19.07	1.62	-4.63	1.26	-23.7	2.35	-14.86	3.01	4.29	1.78	-10.57	3.96	-2.26	1.02	-4.67	0.69	-6.93	1.4	0.11	0.05	0	0.01	0.11	0.05	-2.15	0.99	-4.67	0.68	-6.82	1.37	-17.01	2.6	-0.38
	94	95	LEU	327	8.68	1.54	11.51	1.3	20.19	2.35	-4.71	0.89	-2.29	0.78	-7	1.3	-28.13	0.35	4.9	1.65	-23.23	1.67	-24.16	1.81	14.11	1.96	-10.05	2.7	4.71	0.19	-6.92	1.16	-2.21	1.12	0	0.01	0	0.01	0.01	0.01	4.71	0.19	-6.91	1.16	-2.2	1.12	-19.45	1.74	7.2
	95	96	ARG	328	12.61	2.52	10.74	1.42	23.35	3.1	-3.71	0.86	-0.75	0.64	-4.46	1.15	-225.54	4.19	-8.6	1.21	-234.14	4.05	-216.63	4.81	1.38	1.49	-215.25	4.88	39.92	3.68	-6.01	0.92	33.91	3.69	0.77	0.05	0.21	0.04	0.97	0.05	40.69	3.67	-5.8	0.9	34.89	3.68	-175.95	2.39	-4.42
	96	97	GLU	329	6.74	1.68	10.97	1.56	17.71	2.33	-1.19	0.71	0.11	0.84	-1.08	1.36	49.11	3.57	-4.45	1.4	44.66	4.03	54.66	3.82	6.63	1.88	61.28	4.55	-111.96	3.69	-13.67	0.99	-125.64	4.1	0.79	0.08	0.16	0.04	0.95	0.09	-111.18	3.69	-13.51	1	-124.69	4.08	-56.52	1.57	-6.88
	97	98	CYS	330	3.36	0.97	9.99	1.76	13.36	1.97	-3.21	0.6	-0.5	0.76	-3.71	0.95	6.22	0.92	-5.73	1.48	0.49	1.78	6.37	1.39	3.76	2.13	10.13	2.45	-1.67	0.59	-2.36	1.33	-4.02	1.49	0.02	0.02	0.08	0.04	0.1	0.05	-1.65	0.59	-2.28	1.32	-3.93	1.48	4.72	1.13	1.48
	98	99	ASN	331	11.17	1.78	10.74	1.3	21.91	2.27	-1.5	0.64	-0.81	0.75	-2.31	1.13	-83.61	2.55	0.17	1.85	-83.43	3.54	-73.94	3.34	10.1	1.6	-63.84	4.14	-4.19	2.19	-3.53	0.81	-7.72	2.68	0.53	0.07	0.09	0.02	0.62	0.07	-3.66	2.14	-3.44	0.82	-7.1	2.64	-77.6	1.82	6.66
	99	100	ARG	332	12.76	2.72	11.05	1.38	23.81	3.25	-3.09	0.91	-0.81	0.66	-3.9	1.16	-222.31	3.75	-2.27	1.25	-224.58	3.92	-212.63	4.56	7.96	1.78	-204.67	4.66	37.69	3.68	-6.99	0.92	30.7	3.77	0.96	0.08	0.15	0.04	1.11	0.1	38.65	3.64	-6.84	0.91	31.81	3.73	-173.99	2.46	1.13
	100	101	GLN	333	13.64	2.22	10.23	1.3	23.87	2.67	-0.27	0.7	0.67	0.86	0.4	1.3	-64.57	1.57	-11.71	1.53	-76.28	2.34	-51.2	2.39	-0.82	1.9	-52.02	3.15	-10.6	1.4	-5.71	1.27	-16.31	2.23	1.05	0.06	0.23	0.07	1.27	0.09	-9.56	1.37	-5.48	1.22	-15.04	2.16	-60.76	2.15	-6.3
	101	102	GLU	334	6	1.97	11.2	1.56	17.2	2.54	-1.26	0.66	-0.45	0.83	-1.71	1.16	37.52	4.62	0.15	1.61	37.67	5.24	42.25	4.84	10.9	1.89	53.16	5.56	-100.19	4.79	-10.3	1.19	-110.49	5.26	0.73	0.08	0.12	0.05	0.85	0.12	-99.46	4.76	-10.18	1.16	-109.63	5.21	-57.21	1.71	0.73
	102	103	VAL	335	6.26	1.42	10.45	1.4	16.71	2.09	-2.47	0.78	-0.76	0.9	-3.23	1.36	-22.05	0.52	-1.7	1.6	-23.75	1.73	-18.26	1.64	8	2.1	-10.27	2.85	6.77	0.39	-10.63	1.28	-3.86	1.29	0.02	0.03	0.01	0.02	0.03	0.05	6.79	0.4	-10.62	1.27	-3.83	1.26	-11.48	1.59	-2.62
	103	104	ASN	336	11.45	2.11	10.14	1.3	21.58	2.64	-1.9	0.67	-0.38	0.88	-2.29	1.2	-81.54	2.22	-8	1.3	-89.53	2.87	-71.99	2.7	1.75	1.7	-70.24	3.6	-4.94	1.76	-3.07	0.53	-8.01	2.06	0.49	0.06	0.03	0.02	0.52	0.08	-4.44	1.73	-3.04	0.52	-7.48	2.02	-76.44	1.88	-1.28
	104	105	ALA	337	2.91	0.98	11.08	1.47	13.98	1.9	-0.93	0.23	-1.79	0.72	-2.72	0.81	2.23	0.11	-3.43	0.89	-1.21	0.92	4.2	1.05	5.86	1.31	10.06	1.83	-0.23	0.06	-3.51	0.53	-3.74	0.54	0.19	0.05	0.07	0.02	0.26	0.06	-0.05	0.07	-3.44	0.52	-3.49	0.52	4.15	1.06	2.42
	105	106	VAL	338	6.21	1.43	10.9	1.46	17.12	2.1	0.01	0.68	-0.2	0.97	-0.19	1.18	-21.31	0.53	-4.19	1.21	-25.5	1.16	-15.09	1.54	6.51	1.9	-8.57	2.38	6.06	0.44	-8.71	0.87	-2.65	0.71	0.59	0.08	0.01	0.01	0.6	0.08	6.66	0.42	-8.7	0.87	-2.04	0.71	-8.43	1.51	-2.19
	106	107	VAL	339	6.05	1.55	11.21	1.24	17.26	2.35	-2.37	0.9	-0.66	0.91	-3.03	1.24	-21.33	0.62	-6.39	0.93	-27.72	1.06	-17.66	1.88	4.16	1.52	-13.5	2.61	6.46	0.44	-7.61	0.57	-1.15	0.53	0.14	0.06	0.01	0.01	0.15	0.06	6.6	0.44	-7.59	0.57	-1	0.53	-11.06	1.77	-3.43
	107	108	LEU	340	9.28	1.95	11.14	1.27	20.42	2.26	-3.3	0.83	-2.26	0.73	-5.56	1.15	-27.5	0.38	-2.76	0.95	-30.26	0.95	-21.52	2.1	6.12	1.27	-15.4	2.43	4.25	0.24	-5.68	0.4	-1.43	0.43	0.09	0.03	0.01	0.01	0.11	0.03	4.34	0.24	-5.67	0.39	-1.33	0.42	-17.18	2.12	0.45
	108	109	LEU	341	9.85	1.94	11.67	1.23	21.52	2.48	-1.98	0.96	-1.44	0.88	-3.41	1.27	-28.75	0.44	-7.61	1.25	-36.35	1.21	-20.88	2.15	2.63	1.35	-18.25	2.56	4.78	0.31	-5.64	0.48	-0.85	0.44	0.12	0.04	0.01	0.01	0.14	0.04	4.9	0.3	-5.62	0.48	-0.72	0.44	-15.97	2.09	-2.99
	109	110	TYR	342	8.59	2.2	11.29	1.36	19.87	2.81	-1.63	0.62	-2.53	0.72	-4.16	1.01	-19.38	0.6	-10.86	1.03	-30.25	1.14	-12.43	2.23	-2.11	1.41	-14.53	2.82	-2.95	0.43	-2.09	0.39	-5.04	0.53	0.76	0.06	0.01	0.01	0.77	0.06	-2.19	0.42	-2.08	0.39	-4.27	0.53	-14.62	2.23	-4.18
	110	111	MET	343	7.11	1.8	11.72	1.4	18.82	2.25	-6.51	0.48	-2.86	0.73	-9.38	0.89	-2.53	0.4	-8.21	1.11	-10.74	1.25	-1.93	2	0.64	1.65	-1.29	2.64	2.58	0.32	-3.25	0.34	-0.67	0.47	0.01	0.01	0	0	0.01	0.01	2.59	0.32	-3.25	0.34	-0.66	0.46	0.66	1.96	-2.61
	111	112	ALA	344	2.82	0.91	11.12	1.33	13.94	1.68	-1.87	0.36	-3.49	0.77	-5.37	0.89	2.17	0.12	-11.47	1.7	-9.3	1.75	3.11	1.02	-3.84	1.62	-0.73	2.07	-0.22	0.05	0.1	0.42	-0.12	0.44	0.01	0.01	0	0	0.01	0.01	-0.21	0.05	0.1	0.42	-0.11	0.44	2.9	1.02	-3.73
[truncated: 692 more rows]
[truncated: 3 more columns]

## Sheet: T315I_plerixafor
=>>	COMPLEX
[truncated: 805 more rows]
[truncated: 3 more columns]

## Sheet: T315I_ponatinib
=>>	COMPLEX
[truncated: 805 more rows]
[truncated: 3 more columns]

## Sheet: T315I_ticlopidine
=>>	COMPLEX
[truncated: 805 more rows]
[truncated: 3 more columns]
